# Supplementary material for: Sequencing of Aspergillus nidulans and comparative analysis with A. fumigatus and A. oryzae
Source: Springer Nature journal article supplement (doi:10.1038/nature04341), 2005-12-01
Supplement: 41586_2005_BFnature04341_MOESM1_ESM.doc [file 41586_2005_BFnature04341_MOESM1_ESM.doc]

# Detailed Methods

***A. nidulans* Sequencing and Assembly.** The *A. nidulans* genome strain FGSC A4 was sequenced by the whole-genome shotgun method. A total of 10x coverage was produced at the Broad Institute from Plasmid (4kb and 10kb inserts), Fosmids (40kb inserts), and BACs (110kb inserts) (<http://www.broad.mit.edu/annotation/fungi/aspergillus/background.html>). The BAC library for strain FGSC A4 was provided by Ralph Dean at North Carolina State University and is available at Clemson University Genomics Institute (<https://www.genome.clemson.edu/orders/>). All inserts were sequenced from both ends to generate paired-reads. An additional 3x sequence coverage was provided by Monsanto (<http://www.monsanto.com/>). All sequence was assembled using Arachne1. The assembly was anchored to a genetic map based on 260 markers (201 with unambiguous sequences in Genbank). Six discrepancies in the genome assembly were detected by comparison with the genetic map and corrected (see <http://www.broad.mit.edu/annotation/fungi/aspergillus/markers.html> for more details). *A. fumigatus* and *A. oryzae* genomes were assembled as described in separate reports2,3.

***A. nidulans* Annotation and Analysis.** The *A. nidulans* genome was annotated using the Calhoun annotation system. The genome sequence was searched against the public protein databases using BLASTX with threshold E<1e-5. Genes were predicted using a combination of FGENESH, FGENESH+, and GENEWISE. Predicted genes were validated against ESTs aligned to the genome using Blat4. All predicted proteins were searched against the PFAM set of hidden Markov models5 using the HMMER program and the public protein databases using BLASTP. Transfer RNAs were identified using the tRNAScan-SE program6. Repeat sequences were detected by searching the genome sequence against itself using CrossMatch, filtering for alignments longer than 200bp in length, and clustering pairs based on region overlap. Repeats were characterized using RepeatMasker (<http://ftp.genome.washington.edu/RM/RepeatMasker.html>) and RepBase7 followed by manual inspection. The *A. fumigatus* and *A. oryzae* genomes were annotated as described in separated reports2,3.

**Phylogenetic Analysis.** A total of 3034 orthologs among *A. nidulans, A. oryzae, A. fumigatus, N. crassa,* and *F. graminearum* were predicted using the COG definition8 using BlastP (e<10-5 and alignment length at least 60% of both genes) and aligned at the protein level using ClustalW9. Alignments were then back translated to DNA codons and large gaps (>9b) were removed. Random sets of 20 DNA alignments were concatenated and passed to Phylip to generate 100 bootstrap replicates of alignments using seqboot and a consensus maximum parsimony tree using protpars and consense. Maximum likelihood trees were calculated on each replicate and a consensus tree produced. Repeating the analysis with 1000 bootstrap samples led to essentially identical results. For rooting with *C. immitis*, orthologs from each Aspergillus species were compared to the *C. immitis* genome sequence with TBlastN (e<1e-10). Results were filtered such that: (1) only genes in the Aspergilli that hit to a single locus in *C. immitis* were considered, (2) the best HSP for each gene must not contain a stop codon in *C. immitis* not aligned with a gap position, and (3) all three Aspergillus orthologs must hit the same locus in *C. immitis*. Regions of the *C. immitis* genome corresponding to the intersection of the Aspergillus hits were retrieved, translated, and aligned at the protein level with the aligned portions of the Aspergillus genes. Alignment regions with large gaps (>9bp) were removed. Maximum parsimony trees were then generated using the protpars program of Phylip and trees filtered for those with 100% bootstrap values at all nodes. Raw data are available in Supplementary Material. The C. immitis genome sequence is available at <http://www.broad.mit.edu/annotation/fungi/coccidioides_immitis/>.

**Hierarchical Synteny Mapping.** Protein homology anchors were detected using BlastP (e<1e-5 and length >60% of longest protein) and then filtering to retain only those hits scoring >80% of the score of the best hit to each query protein. The clustering algorithm was initiated by finding contiguous sets of homologous proteins with conserved order and orientation and grouping each into a cluster. Then during each iteration of the algorithm, pairs of clusters were merged into successively larger clusters by tolerating successively larger breaks between clusters. The distance between cluster X and Y was the Euclidean distance between the two nearest points of the rectangle bounding the clusters in a dot plot if (1) the cluster X is orientated toward cluster Y and (2) both are on the same supercontig. Otherwise the distance was infinite. After merging two clusters, the slope of the resulting merged cluster was determined as the slope of a line through the merged clusters. During each merge, the characteristics of the break (microrearrangement) between the merged clusters were tracked. The algorithm was terminated when no clusters within 100Kb of one another were available to be merged.

**Branch-Specific Rearrangements.** Branch-specific breaks were determined by identifying regions without breaks between a reference species, R, and query species, Q, and then identifying breaks in that region between R and a target species, T. Such breaks are considered specific to T. For example, if region 1-10Kb in *A. nidulans* (R) is conserved without microrearrangements when compared to *A. fumigatus* (Q), but the same region shows an inversion when compared to *A. oryzae* (T), this inversion would be considered an *A. oryzae*-specific rearrangement. For a given R, Q, and T, only pairwise blocks longer than 20kb, breaks between R and T larger than 10 kb on either genome, and breaks between R and Q larger than 5kb on either genome were considered. Also, breaks between R and T within 5 kb of contig ends were not considered. Breaks in T that are wholly contained within an inversion between R and Q were considered T specific breaks. The number of breaks specific to T was converted to a rate by dividing by the total number of nucleotides in R used in the analysis. For each target genome, two different R versus Q comparisons were possible. The error bars in Error: Reference source not foundA correspond to the minimum and maximum values for the two comparisons. Breaks were characterized as follows:

- Insertion – at least 10Kb is present in T that does not map to R,Q
- Deletion – at least 10Kb is present in R,Q but does not map to T
- Complex Indel – a combination of Insertion and Deletion
- Inversion – a block of at least 10kb is inverted in T relative to R,Q
- Intrachromosomal Translocation – a break between two syntenic blocks between R,T that are adjacent in R and where the blocks between R,T are on the same chromosome.
- Interchromosomal Translocation – a break between two syntenic blocks between R,T that are adjacent in R and where the blocks between R,T are on different chromosome.

**Identification of Non-coding Conserved Sequences.** Pairwise orthologs were identified as best bidirectional hits (BBHs) within all-vs-all comparison of two genome protein sets using Blastp (e<1e-5) and requiring > 60% coverage of each gene. Threeway orthologs were identified as sets of three genes from each genome in which each gene is a BBH of each of the other two genes. A total of 4936 threeway orthologs were thus predicted.

Genomic sequence for threeway orthologs including 1kb upstream and downstream were multiply aligned using the Mlagan program10 with the phylogenetic tree (AN, (AF, AO)). Within the multiple alignments, unambiguous non-coding regions were defined as regions not annotated as a coding sequence in any of the three genomes. Duplicate regions in alignments of neighboring genes were removed. An additive scoring function (match=3, mismatch=-2, and gap=-20) was used with a linear time algorithm11 to identify maximal scoring subsequences. A score cutoff of 22 was used to define High-scoring Conserved Sequences (HCSs) unlikely to occur by chance (p<0.015) according to models of neutral sequence and random sequence alignment as described next.

**Models of Neutral and Random Alignments.** To model alignments of neutrally evolving sequence, ortholog protein sequences were aligned using ClustalW and subsequently back-translated to DNA codons. Aligned columns of 4-fold degenerate sites from these alignments were placed into a pool, and columns from this pool were then selected randomly with replacement and concatenated to generate synthetic aligned sequences. Both 1000bp fixed length synthetic alignments were generated as well as variable length alignments drawn from a normal distribution approximating observed intergenic lengths in *A. nidulans* (=1110, =140). To model alignments of random sequence, randomly selected intergenic regions were aligned from unrelated loci from each of the three genomes. Both fixed length alignments (800bp clipped from selected intergenic regions) and variable length alignments (full length of each intergenic region aligned) were generated.

A total of 1000 simulated alignments from both the fixed and variable length neutral and random models were generated. For each set of alignments from each model, maximal scoring subsequences were identified as described above. The number of subsequences for each score was normalized by the number of aligned nucleotides in the set of the alignments to produce a spatial rate of the number of subsequences of score X per Mb. These distributions were used to determine a threshold for identifying HCSs as described in the text.

**Prediction of Functional Motifs.**  Each HCS was represented as a position specific probability matrix (PSPM) derived from the threeway alignment. The probability assigned to each base at each position of the matrix was (Cn+B/4)/(N+B) where Cn is the number of occurrences of the letter at that position, N is the number of sequences, and B is the total number of pseudocounts added at each position (0.001). Pseudocounts adjust for the small number of observed sequences by preventing entries of zero in the PSPM as required for log-odds scoring12. Each PSPM was then compared to each other PSPM to find the best scoring pairwise local alignment. Local alignments were scored by summing a log-odds function, F, across each aligned column where F=log2(q/p) and q=dot-product of the columns from the two PSPMs and p=0.25. A minimum length of 8bp and score of 12 was required for local alignments. PSPMs were then clustered according to an iterative greedy clustering algorithm. Specifically, at each iteration if PSPMs X and Y share a local alignment and are part of cluster C, and PSPMs X and Z share a local alignment, and if the local alignments overlap on X within 3bp at each boundary, Z would be added to cluster C. The region of X and Z covered by the corresponding local alignment was then masked, and the algorithm re-iterated. Given clusters of PSPMs, local multiple alignments for each cluster were generated from the genomic sequences corresponding to each PSPM. Specifically, the sequences from all three species corresponding to each PSPM, as well as 6bp of padding on each side, were aligned using the program MEME13 (with the “oops” model). The resulting multiple alignments and corresponding weight matrices were termed CONserved PATterns (conpats). Raw conpats from MEME were trimmed to require 2 consecutive bases with information content exceeding 0.75 bits/position at each end. Additionally, low quality patterns (MEME expect >1e-5 or conpats with <1.2 bits/base information content) were removed.

For each conpat, we used the corresponding weight matrix with the MAST14 program to identify instances where the conpat co-occurred upstream or co-occurred downstream of orthologous genes in each of the three Aspergillus species. Matches on either strand were permitted. To associate matches with upstream/downstream regions, we identified a unique non-coding “upstream-half region” and “downstream-half region” for each ortholog triplet: for orthologs with no neighboring gene within 1000bp, 500bp of aligned sequence upstream/downstream was used; for orthologs with a neighboring gene, the unambiguous intergenic region was split in half. The MAST expect threshold was determined in order to generate <1 false positive co-occurrence in the 4936 orthologous genes, based on a null model assuming randomly occurring motifs will occur independently in each of 3 orthologous regions according to background base frequency. A series of conservation tests were then applied to the set of predicted co-occurrences for each conpat:

- *Co-occurrence enrichment*: used to identify conpats that co-occur more often than random patterns of the same length and degeneracy. For each conpat, we generated 1000 different patterns by randomly assigning the weights at each position of the conpat to letters (A,C,G,T). Co-occurrences of randomized patterns were then identified as described above. The co-occurrence p-value was defined based on the number of random patterns with co-occurrence counts at least as great as the actual conpat. Conpats with p-values <0.01 were considered enriched by this test.
- *Upstream/Downstream Bias*: used to identify conpats with a preference for co-occurring in upstream or downstream regions. We assigned p-values based on binomial distribution with Prob(upstream co-occurrence)=p=0.56 (calculated from upstream/downstream distribution of all HCSs). Conpats with p-values <0.01 were considered biased by this test.
- *Functional Category Enrichment*: used to identify conpats that were enriched in co-occurrences neighboring genes of particular COG categories. COG categories were assigned using the NCBI COG database followed by manual inspection. For each conpat and each category C, we calculated the enrichment p-value according to a hypergeometric distribution and corrected for multiple testing using the Bonferroni correction (multiplying by the number of categories associated with the particular conpat). If a conpat exhibits upstream/downstream preference, only the corresponding upstream/downstream co-occurrences were used for category enrichment testing. Categories with corrected p-values<0.01 were considered enriched.
- *Cellular Location Enrichment*: used to identify conpats that are enriched in co-occurrences associated with genes whose predicted yeast BBHs have a particular cellular localization. Cellular localization for S. cerevisiae genes from http://yeastgfp.ucsf.edu/15. Categories “ambiguous” and “punctuate” were not considered. The enrichment p-value was calculated using a hypergeometric distribution with Bonferroni corrections in the same manner as with the functional category enrichment test.

Conpats with similar weight matrices (CompareACE16 score>0.85 and manual inspection) and identical statistical signatures were collapsed. A total of 69 conserved patterns (“conpats”) that occurred in at least 4 HCSs, showed enrichment in co-occurrences, and a bias for occurring upstream or downstream of genes were identified and considered in this analysis. The full set of conpats are provided in Supplementary Material.

**Prediction of Upstream Open Reading Frames.** Genome sequences for the set of 4936 ortholog triplets, including 1000bp upstream and downstream, were multiply aligned using Mlagan. For 25% of *A. nidulans* genes with overlapping EST alignments, the entire length of the EST alignment upstream of the predicted AUG was taken as the 5’ UTR. Using the length distribution of these EST-predicted UTRs, we found that 60% of all predicted 5’ UTR first exons were longer than 60bp. Thus for genes lacking EST alignments, we used 60bp upstream of predicted AUGs as a conservative estimate of 5’ UTRs. To correct for annotation ambiguities when no ESTs were available, UTRs for orthologs where considered when all three annotated start codons aligned within 40bp. For each species, we identified all upstream open reading frames >= 12bp, with a maximum 1bp overlap with the protein-coding gene’s ATG. Conserved uORFs were identified as those whose start and stop codons were aligned within the multiple species alignment, with no minimum uORF protein identity.

**Experimental Validation of Upstream Open Reading Frames.** The impact of predicted uORFs on downstream gene translation was assessed by adapting a protocol previously described17-20. Synthetic oligonucleotides were designed to obtain 5’-leader sequences containing each uORF including 26nt upstream of the uORF, the region between the uORF and the protein coding AUG, and the first four codons of the protein coding gene. Oligonucleotides were obtained from Sigma-Genosys. These leader sequences were fused in frame with a firefly luciferase gene. Three different control constructs were also generated: one eliminated the initiation codon for the uORF, one eliminated the initiation codon for the predicted gene luciferase fusion, and the third eliminated both. Thus four constructs were made for each uORF: +/+ (both uORF and downstream product AUG codons), -/+ (no uORF AUG), +/- (no downstream AUG) and -/- (neither AUG). The first two constructs evaluate uORF function; the latter two establish that reporter activity is arising from initiation at the correct downstream start codon. Capped and polyadenylated synthetic mRNA were prepared from each construct and equal amounts were used to program cell-free extracts from *N. crassa*. Each set of transcripts was produced by two independent transcription reactions and analyzed in the linear activity range using two independently prepared extracts from each organism. All reactions contained Renilla luciferase mRNA as an internal control for normalization. Differential expression of the reporter gene between the intact construct and the controls was measured using a luciferase activity assay21 as well as through the production of 35S-Met labeled firefly luciferase obtained by in vitro translation of the same mRNAs.

Only a small number of genes in Aspergillus with validated uORFs have been previously reported22-27.

References

1. Batzoglou, S. et al. ARACHNE: a whole-genome shotgun assembler. *Genome Res* **12**, 177-89 (2002).

2. Nierman, W. C., et al. Genomic sequence of the pathogenic and allergenic Aspergillus fumigatus. (Submitted).

3. Machida, M., et al. Genome sequencing and analysis of *Aspergillus oryzae*. (Submitted).

4. Kent, W. J. BLAT--the BLAST-like alignment tool. *Genome Res* **12**, 656-64. (2002).

5. Bateman, A. et al. The Pfam protein families database. *Nucleic Acids Res* **28**, 263-6 (2000).

6. Lowe, T. M. & Eddy, S. R. tRNAscan-SE: a program for improved detection of transfer RNA genes in genomic sequence. *Nucleic Acids Res* **25**, 955-64. (1997).

7. Jurka, J. Repbase Update: a database and an electronic journal of repetitive elements. *Trends Genet* **16**, 418-419 (1000).

8. Tatusov, R. L. et al. The COG database: an updated version includes eukaryotes. *BMC Bioinformatics* **4**, 41 (2003).

9. Chenna, R. et al. Multiple sequence alignment with the Clustal series of programs. *Nucleic Acids Res* **31**, 3497-500 (2003).

10. Brudno, M. et al. LAGAN and Multi-LAGAN: efficient tools for large-scale multiple alignment of genomic DNA. *Genome Res* **13**, 721-31 (2003).

11. Ruzzo, W. L. & Tompa, M. A linear time algorithm for finding all maximal scoring subsequences. *Proc Int Conf Intell Syst Mol Biol*, 234-41 (1999).

12. Henikoff, J. G. & Henikoff, S. Using substitution probabilities to improve position-specific scoring matrices. *Comput Appl Biosci* **12**, 135-43 (1996).

13. Bailey, T. L. & Elkan, C. Fitting a mixture model by expectation maximization to discover motifs in biopolymers. *Proc Int Conf Intell Syst Mol Biol* **2**, 28-36 (1994).

14. Bailey, T. L. & Gribskov, M. Combining evidence using p-values: application to sequence homology searches. *Bioinformatics* **14**, 48-54 (1998).

15. Huh, W. K. et al. Global analysis of protein localization in budding yeast. *Nature* **425**, 686-91 (2003).

16. Roth, F. P., Hughes, J. D., Estep, P. W. & Church, G. M. Finding DNA regulatory motifs within unaligned noncoding sequences clustered by whole-genome mRNA quantitation. *Nat Biotechnol* **16**, 939-45 (1998).

17. Gaba, A., Wang, Z., Krishnamoorthy, T., Hinnebusch, A. G. & Sachs, M. S. Physical evidence for distinct mechanisms of translational control by upstream open reading frames. *EMBO J.* **20**, 6453-6463 (2001).

18. Wang, Z. & Sachs, M. S. Arginine-specific regulation mediated by the *Neurospora crassa arg-2* upstream open reading frame in a homologous, cell-free *in vitro* translation system. *J. Biol. Chem.* **272**, 255-261 (1997).

19. Lee, I. Y. et al. Complete genomic sequence and analysis of the prion protein gene region from three mammalian species. *Genome Res* **8**, 1022-37 (1998).

20. Wang, Z., Gaba, A. & Sachs, M. S. A highly conserved mechanism of regulated ribosome stalling mediated by fungal arginine attenuator peptides that appears independent of the charging status of arginyl-tRNAs. *J. Biol. Chem.* **274**, 37565-37574 (1999).

21. Fang, P., Wang, Z. & Sachs, M. S. Evolutionarily conserved features of the arginine attenuator peptide provide the necessary requirements for its function in translational regulation. *J Biol Chem* **275**, 26710-9 (2000).

22. Krappmann, S. et al. The Aspergillus fumigatus transcriptional activator CpcA contributes significantly to the virulence of this fungal pathogen. *Mol Microbiol* **52**, 785-99 (2004).

23. Hoffmann, B., Valerius, O., Andermann, M. & Braus, G. H. Transcriptional autoregulation and inhibition of mRNA translation of amino acid regulator gene cpcA of filamentous fungus Aspergillus nidulans. *Mol Biol Cell* **12**, 2846-57 (2001).

24. Morrice, J., MacKenzie, D. A., Parr, A. J. & Archer, D. B. Isolation and characterisation of the acetyl-CoA carboxylase gene from Aspergillus nidulans. *Curr Genet* **34**, 379-85 (1998).

25. Dutton, J. R., Johns, S. & Miller, B. L. StuAp is a sequence-specific transcription factor that regulates developmental complexity in Aspergillus nidulans. *Embo J* **16**, 5710-21 (1997).

26. Wu, J. & Miller, B. L. Aspergillus asexual reproduction and sexual reproduction are differentially affected by transcriptional and translational mechanisms regulating stunted gene expression. *Mol Cell Biol* **17**, 6191-201 (1997).

27. Han, S., Navarro, J., Greve, R. A. & Adams, T. H. Translational repression of brlA expression prevents premature development in Aspergillus. *Embo J* **12**, 2449-57 (1993).
