# Supplementary material for: Sequencing of Aspergillus nidulans and comparative analysis with A. fumigatus and A. oryzae
Source: Springer Nature journal article supplement (doi:10.1038/nature04341), 2005-12-01
Supplement: 41586_2005_BFnature04341_MOESM3_ESM.doc [file 41586_2005_BFnature04341_MOESM3_ESM.doc]

# Synteny Analysis

## Hierarchical Synteny Clustering Method

Blocks of snyteny were predicted using a hierarchical clustering technique (Figure S2.1A). The algorithm is initiated by detecting clusters of sequence anchors with conserved order and orientation. These regions are then merged in to successively larger syntenic clusters by tolerating successively larger rearrangements within blocks. Specifically:

*Given:* two genome sequences with a set of pairwise alignments defined on a two-dimensional coordinate system formed by the concatenation of the contigs of each genome.

*Step1: Calculate Exact Syntenic Clusters*. Find blocks of anchors with exact conservation of order and orientation and cluster them. The orientation of each cluster is either "+" or "-" (defined as expected from the given coordinate system). Create a list, L, of these seed clusters.

*Step2: Initialize the Cluster Distance Matrix*. Define the bounds of a cluster as its endpoints on each axis of the coordinate system (this defines a box). Define the asymmetric distance between cluster X and cluster Y as the cartesian distance between the two nearest points on the bounds if (a) these clusters are on the same supercontig, (b) the distance is less than a scale factor D, and (c) *only if cluster X is oriented toward cluster Y* (see Figure S2.1)*.* Otherwise the distance is infinity. Calculate the complete distance matrix, dij, between all pairs of clusters (in practice only one half of the matrix is required).

*Step3: Merge Nearest Cluster*. Find the minimum entry in the distance matrix and merge the two corresponding clusters into a new cluster. Create pointers in the new cluster to the merged clusters. Remove the merged clusters from L, and add the new cluster.

*Step4: Calculate Merged Cluster Orientation.* The orientation of the new cluster is defined according to the slope of the line through the merged clusters.

*Step5: Update Distance Matrix*. Remove the entries in dij for the merged clusters and create an entry for the new cluster. Recalculate those entries impacted by this procedure. Increase the scale factor D and repeat steps 3-5 until D exceeds the size of the largest supercontig.

*Output:* When no new clusters can be merged, output L. Each cluster in L is a tree defining a hierarchical relationship between merged clusters.

An example of the algorithm applied to a 1Mb region of synteny between *A. nidulans* and *A. fumigatus* is shown in Figure S2.1B. The clustering function produces a tree-based data structure that can be manipulated by standard tree traversal algorithms. Using these structures, the number of rearrangement events (at a any given level of resolution) in pairwise comparisons can be calculated. Given multiple pairwise comparisons, branch specific rearrangements can be calculated as described in the methods.


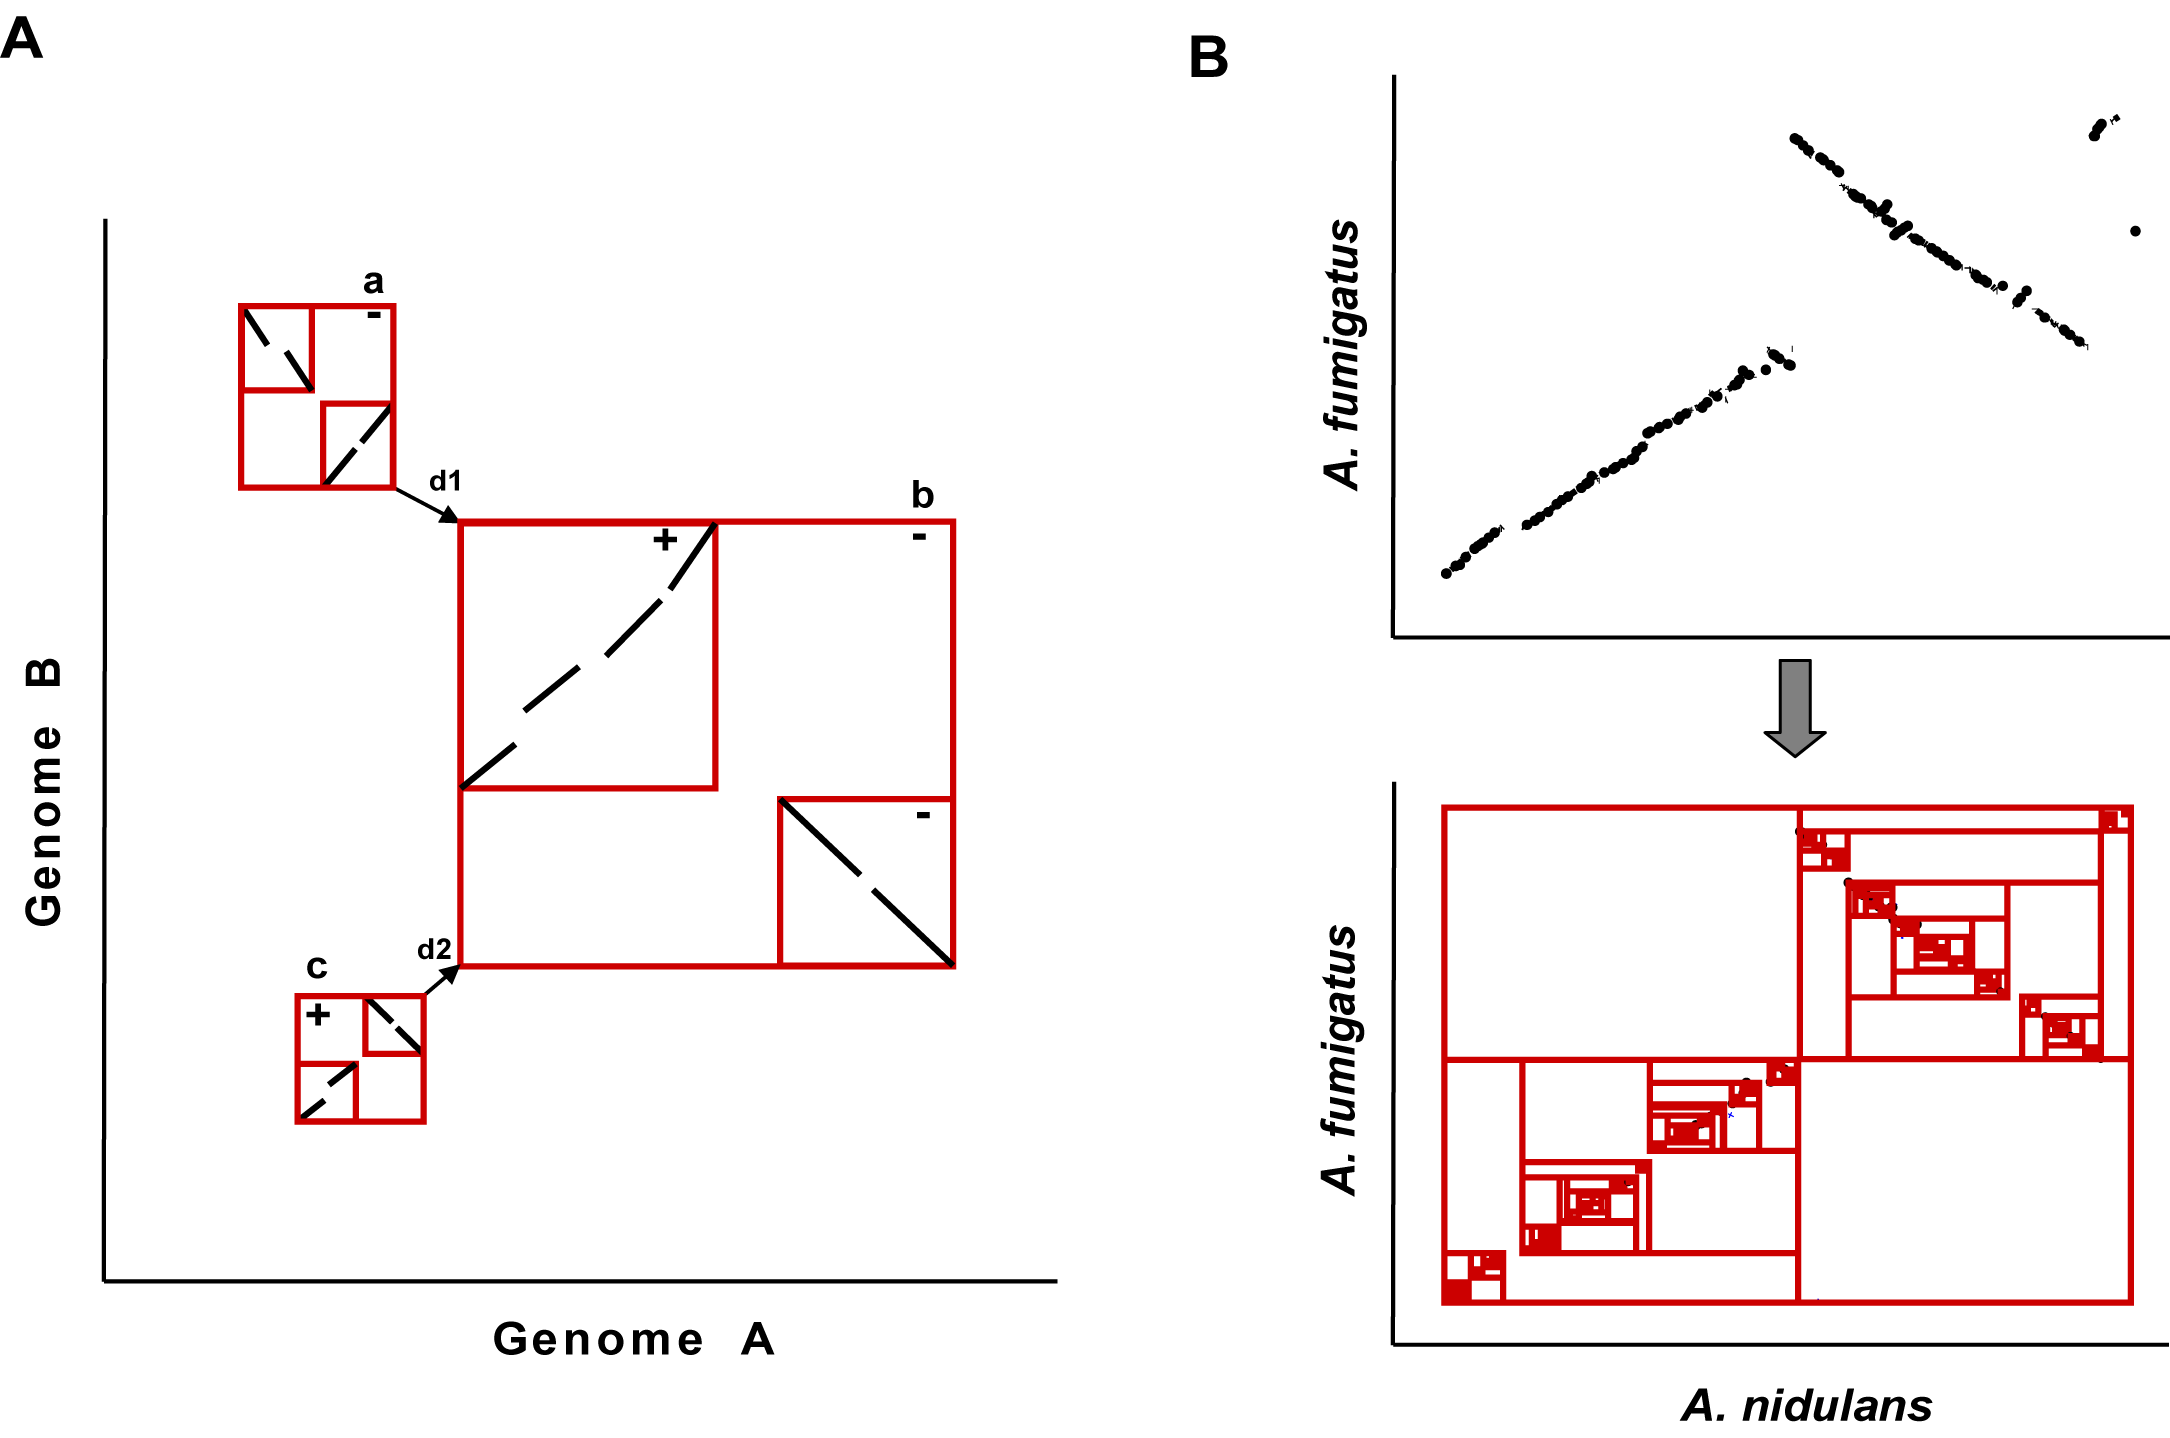


Figure S2.1. Hierarchical clustering algorithm for whole genome synteny mapping. (A) Algorithm schematic. Each cluster (boxes) is associated with an orientation ('+' or '-' symbols). An asymmetric distance is defined between all pairs of clusters. If a cluster is oriented "toward" another, the distance is defined to be the cartesian distance (e.g. dab=d1). Otherwise the distance is infinity (e.g. dba=∞). The method merges the closest pair of clusters at each iteration. Information about merged clusters is maintained (boxes within boxes). See text for more details. (B) Application to 1Mb region of synteny between *A. nidulans* and *A. fumigatus*. The method identifies the large inversion, as well as rearrangements within rearrangements (boxes within boxes).

## Syntenic breaks are associated with repeats and telomeres

As described in the main text, an examination of the pattern of pairwise syteny between the three Aspergilli reveals large regions lacking detectable long range synteny. Repeat sequences are enriched in these non-syntenic regions, with 40% of *A. nidulans* repeats sequences in breaks with both *A. fumigatus* and *A. oryzae*, compared to 27% expected (p<1e-116 – similar enrichments for *A. fumigatus* and *A. oryzae*). Extensive rearrangement is also observed at the ends of Aspergillus chromosomes. This association of large-scale genome rearrangement with repeats and chromosome ends has been observed for a number organisms including mammals, nematodes, and yeasts7,9-13, and our data confirm these trends for the Aspergilli.

In addition, the observed subtelomeric rearrangement may have specific implications for fungi. Growing evidence suggests that subtelomeric regions in fungi contain genes with roles in niche adaptation and virulence. It is thus noteworthy that sub-telomeric regions in both *A. nidulans* and *A. fumigatus* show enrichment for gene clusters with predicted roles in secondary metabolism. In *A. fumigatus*, 8 of 24 secondary metabolite clusters are found within 100Kb of the nearest telomere (p<1e5), while in *A. nidulans*, 11 different secondary metabolite gene clusters, including a penicillin and a sterigmatocystin cluster, are situated within 100 kb of the nearest telomere. Further, over 30% of predicted non ribosomal peptide synthetases and polyketide synthases genes in *A. nidulans* and *A. fumigatus* reside within just 100 kb of a telomere (a 5.5-fold enrichment). This enrichment suggests that these genes may play an important role in the ecology of these fungi. The rapid rearrangement of subtelomeric regions may facilitate the species specific evolution of these genes, and in this regard it is conspicuous that *A. nidulans* and *A. fumigatus* do not have any telomere-associated secondary metabolite gene clusters in common.

## The Random Breakage Model of Genome Evolution

As described in the main text, it has long been proposed that genomes evolve according to random breakage model which predicts that distances between breakpoints should follow an exponential distribution of the form f(x) = 1/L e-x/L, where L is the average size of all unbroken segments14,15. To determine whether conserved syntenic blocks in Aspergilli follow random breakage, we analyzed the distribution of lengths of unbroken regions between micro-rearrangements within pairwise syntenic blocks (see Methods). As shown in XXXXX, although the mean breakpoint length differs between the three pairwise comparisons, in all three cases the distribution of lengths shows close agreement with the model prediction. It thus appears that syntenic blocks, comprising the majority of the Aspergillus chromosomes, are evolving in a manner consistent with random breakage.


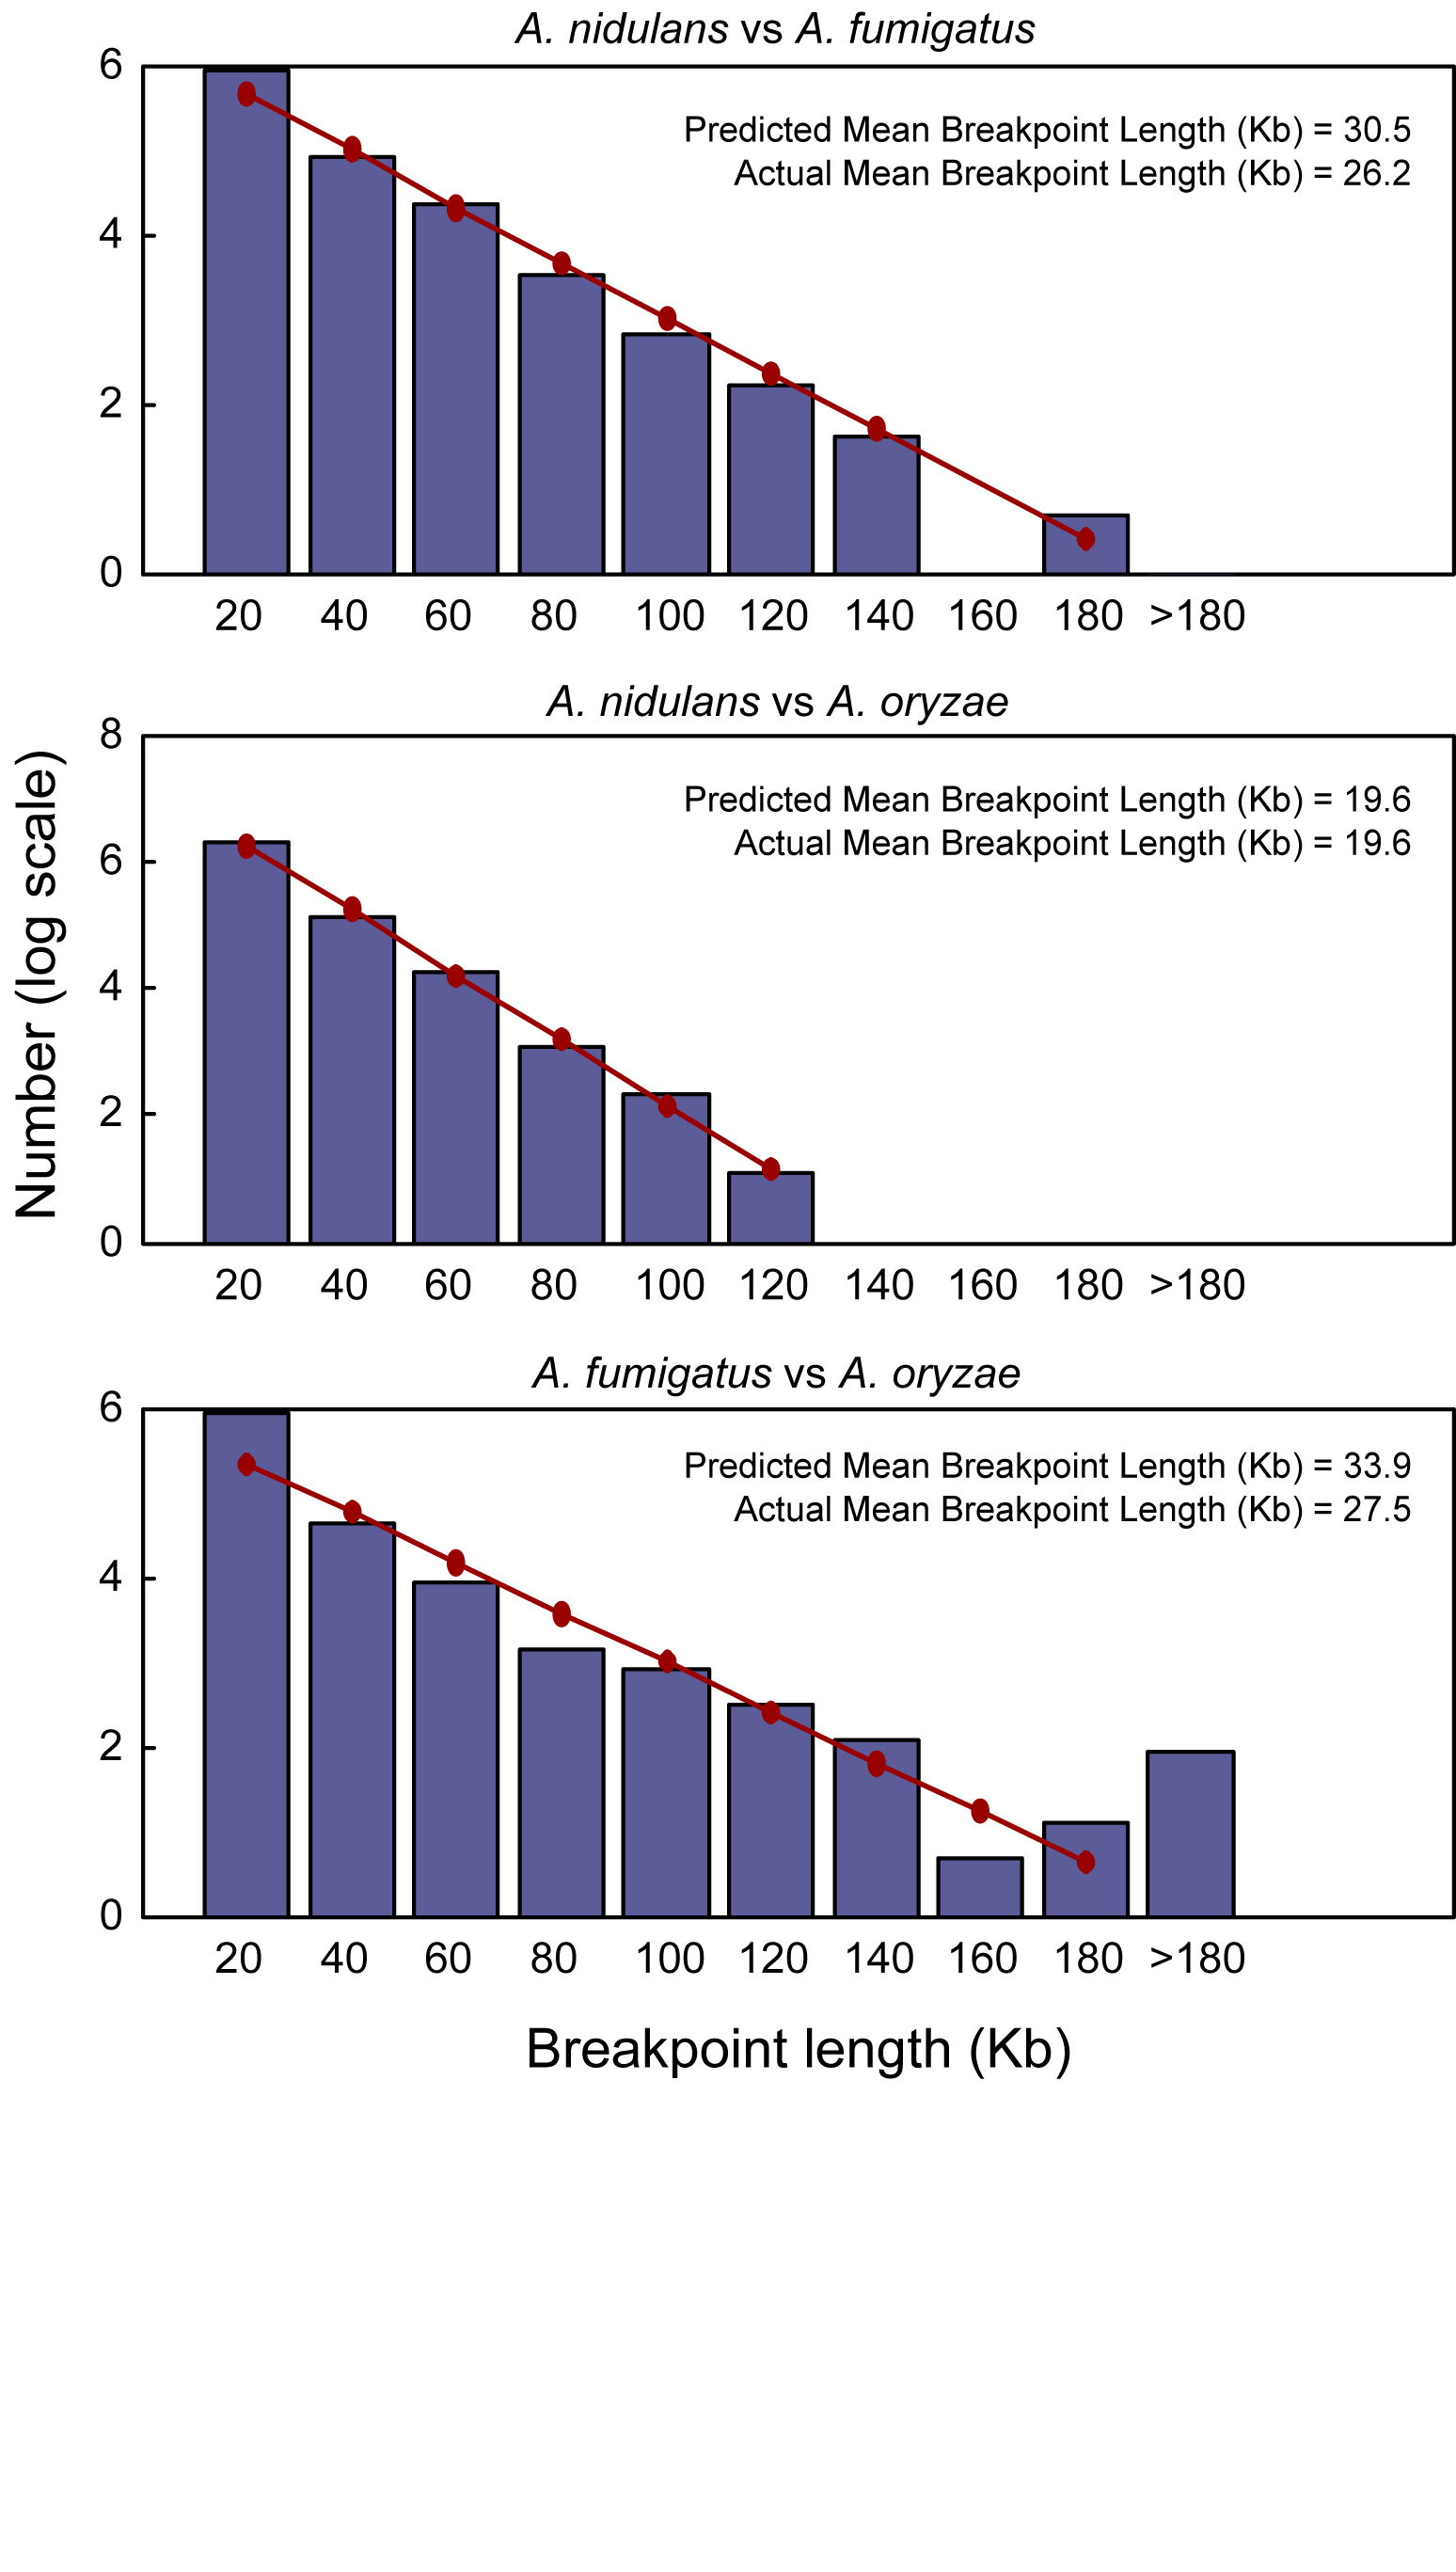


Figure S2.2 Random Distribution of Breakpoints in Conserved Syntenic Blocks. Histogram of length distributions between microrearrangement breakpoints within conserved pairwise syntenic blocks. Red line indicates fit to random breakage model which predicts an exponential distribution of breakpoint lengths of the form f(x)=e-x/L where L is the predicted mean breakpoint length.

## No Deceleration of Rearrangement in A. fumigatus

The data in Figure 4 reveal a greater rate of rearrangement in *A. oryzae* relative to *A. fumigatus*. In principle, this could be due to a deceleration in breakage in *A. fumigatus*, possibly consistent with parasitic lifestyle. However, if this were the case, and the rate remained constant in *A. oryzae* and *A. nidulans*, syntenic blocks between *A. fumigatus* and *A. oryzae* would be larger than those between *A. fumigatus* and *A. nidulans*. Instead the opposite is observed Table 2. We note also that a greater rate of rearrangement is consistent with the smaller average syntenic block sizes for *A. oryzae* (Table 2).

## Similar Rates of Protein Evolution in A. fumigatus and A. oryzae

We compared the rates of molecular evolution in *A. oryzae* and *A. fumigatus* with *A. nidulans* as an outgroup using a number of different but related methods. First, an examination of threeway orthologs revealed the distribution of amino acid identity to be nearly identical for both *A. oryzae* and *A. fumigatus*, relative to *A. nidulans*. Equivalently, a scatter plot of non-synonymous divergences of *A. fumigatus* and *A. oryzae* threeway orthologs relative to A. nidulans reveales a strong correlation between *A. fumigatus* and *A. oryzae* divergences with an overall slope of nearly 1. Finally, branch lengths predicted from both single gene and concatenated gene phylogenies indicate a comparable rate of substitution in both the *A. oryzae* and *A. fumigatus* lineages.

**Figure S2.3. Correlation between non-synonymous divergence rates (substitutions/site) of three way orthologs in *A. fumigatus* and *A. oryzae* relative to *A. nidulans*.**
