# Supplementary material for: Sequencing of Aspergillus nidulans and comparative analysis with A. fumigatus and A. oryzae
Source: Springer Nature journal article supplement (doi:10.1038/nature04341), 2005-12-01
Supplement: 41586_2005_BFnature04341_MOESM4_ESM.xls [file 41586_2005_BFnature04341_MOESM4_ESM.xls]

## Sheet: Description
§S3 Upstream open reading frames (uORFs)
Method:
To search for uORFs conserved between the three Aspergillus species, we started with the set of 4936 ortholog triplets and 1000bp upstream regions multiply aligned using MLAGAN. For the 25% of A. nidulans genes with EST alignments indicating 5’ UTRs, the entire length of the EST alignment was searched for uORFs. Otherwise the search was conservatively constrained to the upstream 60bp region, sinc…
We also include here, under the "extended_data_300bp" tab, those uORFs not within 60bp or in UTRs, but within 300bp of aligned upstream sequence. These may not be within the mRNA transcript.
For each data set, we also search for uORFs in the An gene's ortholog in other fully-sequenced fungi: Neurospora crassa (Nc), Fusarium graminearum (Fg), Magnaporthe grisea (Mg), Saccharomyces cerevisiae (Sc), Saccharomyces bayanus (Sb), Saccharomyces mikatae (Sm), and Saccharomyces paradoxus (Sp). Orthologs are defined as best bidirectional hit within an all-vs-all blastp analysis (expect < 1e-5,…
The 38 uORFs mentioned in the text that are conserved in all three Aspergilli are provided in the tab "Aspergillus Conserved uORFs"
Abbreviations:
an: Aspergillus nidulans
af: Aspergillus fumigatus
ao: Aspergillus oryzae
Data fields: (use tab "data" below)
uORF_id: unique identifier for each uORF
ortholog_cluster_id: unique identifier for each 3-way ortholog
species: species that contains the uORF; "conserved" indicates uORF is found in all 3 species with the start and stop codons aligned
an_gene,af_gene,ao_gene: locus identifier for each of the 3-way orthologs
in_utr: 1 if the location of the uORF overlaps a 5' An UTR (as defined by an EST alignment)
an_rel_start, af_rel_start, ao_rel_start: coordinate of the uORF's ATG relative to the protein-coding gene's start codon
an_rel_stop, af_rel_stop, ao_rel_stop: coordinate of the stop codon relative to the protein-coding gene's start codon (1 indicates that the "A" of the stop codon's TGA/TAA overlaps with the gene's ATG)
consensus_dna: uORF consensus DNA sequence, using the degenerate DNA code if the uORF is conserved
an_dna,af_dna,ao_dna: DNA sequence of the uORF in each species
consensus_aa: uORF amino acid sequence from An, with capital letters representing 3-way conserved amino acids (if not conserved, use the species specific amino acid sequence)
an_aa, af_aa, ao_aa : uORF amino acid sequence in each species
context_up_consensus: 10bp upstream of uORF start codon, in degenerate code if the uORF is conserved
context_down_consensus: 10bp down of uORF stop codon, in degenerate code if the uORF is conserved
within_60bp : 1 if the uORF is within 60bp of the protein-coding gene's start codon
COG category: functional category designation of the An gene
fg_uorf_utr: name of Fusarium ortholog with a uORF contained within the 5' UTR (defined by EST alignment)
mg_uorf_utr: name of Magnaporthe ortholog with a uORF contained within the 5' UTR (defined by EST alignment)
nc_uorf_utr: name of Neurospora ortholog with a uORF contained within the 5' UTR (defined by EST alignment)
sc_uorf_utr: name of S.cerevisiae ortholog with a uORF contained within the upstream 100bp
sc_cooccur_orf_100bp: name of S.cerevisiae ortholog with a uORF contained within the upstream 100bp, where uORF is also found upstream of orthologs in Sb, Sm, and Sp

## Sheet: Aspergillus Conserved uORFs 
Genes with conserved upstream ORFs
A. nidulans Locus	Predicted function	uORF pos†	Length (aa)
AN8076.1	Splicing coactivator SRm160/300 subunit SRm300	-11	3
AN0244.1	Vacuolar assembly/sorting protein VPS8	-23	7
AN2905.1	DNA-binding proteins Bright/BRCAA1/RBP1	-23	3
AN3144.1	FYVE finger-containing protein	-23	3
AN4486.1	hypothetical protein	-26	8
AN1179.1	Vacuolar import and degradation protein	-27*	5
AN4864.1	Glucosyltransferase - Alg6p	-30	4
AN1341.1	Membrane coat complex Retromer subunit VPS29	-31*	3
AN5627.1	Nuclear pore complex, Nup98 component	-33	3
AN0877.1	hypothetical protein	-34	6
AN0118.1	Dyneins, heavy chain	-36	8
AN5885.1	Glycogen synthase	-36	4
AN1168.1	Voltage-gated Ca2+ channels, alpha1 subunits	-37§	5
AN4597.1	Structural maintenance of chromosome protein 4	-38	12
AN5151.1	Predicted membrane protein	-48*	3
AN4460.1	18S rRNA processing complex subunit	-52	3
AN9125.1	RNA polymerase III, subunit C34	-52*	8
AN1854.1	hypothetical protein	-57	17
AN1494.1	TATA binding protein associated factor	-60	15
AN1014.1	Peroxisomal long-chain acyl-CoA transporter	-67*§	8
AN6642.1	Ca2+ transporting ATPase	-68*	4
AN5528.1	Mitochondrial Fe/S cluster exporter	-69*	3
AN8846.1	Protein involved in beta-1,3-glucan synthesis	-87*	7
AN8723.1	predicted protein	-93*	17
AN5966.1	FOG: Zn-finger	-100*	5
AN6642.1	Ca2+ transporting ATPase	-101*	15
AN5452.1	Splicing factor 3b, subunit 3	-105*	6
AN2902.1	TFIIF-interacting CTD phosphatases	-143*	3
AN4670.1	FOG: WD40 repeat	-171*	3
AN1779.1	Protein kinase (DNA replication initiation)	-177*	4
AN1546.1	Histone deacetylase complex, SIN3 component	-185*	3
AN8009.1	ABC-type nitrate/sulfonate/bicarbonate transport	-191*	21
AN1521.1	DNA-directed RNA polymerase subunit E'	-207*	3
AN0412.1	FOG: Immunoglobin and related proteins	-228*	5
AN4984.1	Cyclin	-236*	4
AN1082.1	Nucleoside phosphatase	-243*	8
AN1349.1	mRNA-binding protein Encore	-254*	17
AN6843.1	Mitochondrial/chloroplast ribosomal protein L4	-278*§	13
AN1349.1	mRNA-binding protein Encore	-418*	5
†uORF start position relative to gene start codon. * uORF overlaps 5' EST alignment. Bold rows indicate experimentally tested loci. §Predicted orthologs in S. cerevisiae contain uORFs conserved in 4 related yeast species18. Also note that AN1349.1 has two uORFs.

## Sheet: data
uORF_id	ortholog_cluster_id	species	an_gene	af_gene	ao_gene	in_utr	an_rel_start	an_rel_stop	af_rel_start	af_rel_stop	ao_rel_start	ao_rel_stop	consensus_dna	an_dna	af_dna	ao_dna	consensus_aa	an_aa	af_aa	ao_aa	context_up_consensus	context_down_consensus	within 60bp	COG category	fg_uorf_utr	mg_uorf_utr	nc_uorf_utr	sc_uorf_100bp	sc_cooccur_orf_100bp
5	4	conserved	AN0877.1	70.m15480	AO070320000036	0	-34	-14	-34	-14	-34	-14	ATGTGTkGTGAyCACGGmTGA	ATGTGTTGTGATCACGGATGA	ATGTGTTGTGACCACGGCTGA	ATGTGTGGTGACCACGGATGA	MCcDHG*	MCCDHG*	MCCDHG*	MCGDHG*	yrrrTGysmv	hhAyTyGCTC	1		0	0	0	0	0
7	4	an	AN0877.1	70.m15480	AO070320000036	0	-41	-24					ATGCCCGATGTGTTGTGA	ATGCCCGATGTGTTGTGA			MPDVL*	MPDVL*			CAACGCTCAA	TCACGGATGA	1		0	0	0	0	0
22	19	af	AN6250.1	72.m19408	AO070304000038	1			-568	-557			ATGGATACCTAA		ATGGATACCTAA		MDT*		MDT*		GGTCTTGAGG	GGCTGCTTCA	0	O	0	MG06681.1	0	0	0
23	19	af	AN6250.1	72.m19408	AO070304000038	1			-501	-451			ATGGAGAGTAGTGAGCAATCTATTATTTTTCTCTACTCCGTAATCTACTAG		ATGGAGAGTAGTGAGCAATCTATTATTTTTCTCTACTCCGTAATCTACTAG		MESSEQSIIFLYSVIY*		MESSEQSIIFLYSVIY*		GGCTGGCCGT	ACATCAACGA	0	O	0	MG06681.1	0	0	0
24	19	af	AN6250.1	72.m19408	AO070304000038	1			-398	-219			ATGGTCAACCGTCATCGTCGTAACCAAGTACAGCGCGACCAGCTCATCGTTGTTAGTCCCTCCTCGTGGCTCTCTTTTTGCCGCCTCCGACCTCCAATACTCATTATTTCTTCCCTTCCCGCCTTGAGCGCTGGCAATAATATAACTGATCCGCGACTTCCACCGCCATCTTTTCTCTGA		ATGGTCAACCGTCATCGTCGTAACCAAGTACAGCGCGACCAGCTCATCGTTGTTAGTCCCTCCTCGTGGCTCTCTTTTTGCCGCCTCCGACCTCCAATACTCATTATTTCTTCCCTTCCCGCCTTGAGCGCTGGCAATAATATAACTGATCCGCGACTTCCACCGCCATCTTTTCTCTGA		MVNRHRRNQVQRDQLIVVSPSSWLSFCRLRPPILIISSLPALSAGNNITDPRLPPPSFL*		MVNRHRRNQVQRDQLIVVSPSSWLSFCRLRPPILIISSLPALSAGNNITDPRLPPPSFL*		TCTCCATCCT	ACGATCCGAT	0	O	0	MG06681.1	0	0	0
46	46	an	AN2446.1	69.m15213	AO070264000031	0	-41	-18					ATGCCGTCTGAATCACGTCCATAG	ATGCCGTCTGAATCACGTCCATAG			MPSESRP*	MPSESRP*			AAACGATTAT	ATTCAGATCT	1		0	0	0	0	0
66	51	ao	AN1507.1	55.m03019	AO070334000226	0					-47	-30	ATGACTTGGATCGTGTGA			ATGACTTGGATCGTGTGA	MTWIV*			MTWIV*	GTATTCACGC	GTAGGTTTGT	1		0	0	0	0	0
75	61	an	AN8809.1	71.m15615	AO070276000049	0	-40	-20					ATGAAGGCAAAGGGCCTTTGA	ATGAAGGCAAAGGGCCTTTGA			MKAKGL*	MKAKGL*			TATTTCCCGC	TCGTCATCGG	1	R	0	0	0	0	0
77	61	af	AN8809.1	71.m15615	AO070276000049	0			-43	-32			ATGAAGTTATAA		ATGAAGTTATAA		MKL*		MKL*		TGAACACCCT	TACCATCAAC	1	R	0	0	0	0	0
82	61	ao	AN8809.1	71.m15615	AO070276000049	0					-42	-22	ATGAGGCCGACATTTCCGTGA			ATGAGGCCGACATTTCCGTGA	MRPTFP*			MRPTFP*	TCGTGACTGC	AACACAGGCG	1	R	0	0	0	0	0
116	85	conserved	AN1521.1	55.m03040	AO070334000239	1	-207	-196	-283	-272	-282	-271	ATGArybryTrA	ATGAATCATTAA	ATGAGCGACTGA	ATGAGCTGCTGA	Mnh*	MNH*	MSD*	MSC*	kmbwsykryC	khTyhbddyh	0	K	0	0	0	0	0
117	85	af	AN1521.1	55.m03040	AO070334000239	1			-363	-337			ATGTCTCGGTTCTATACCCTCCATTAG		ATGTCTCGGTTCTATACCCTCCATTAG		MSRFYTLH*		MSRFYTLH*		TCTGTTCTTG	CGTTTTTCAA	0	K	0	0	0	0	0
119	92	af	AN8843.1	71.m15975	AO070271000034	0			-55	-44			ATGCCTTTCTAA		ATGCCTTTCTAA		MPF*		MPF*		ACTTTCTTTC	TCAGACCGTT	1	E	FG10211.1	0	0	YHR025W	YHR025W
140	109	af	AN2928.1	59.m09067	AO070337000181	1			-342	-316			ATGCTAGACAAAGGGTGGCGCTGGTAG		ATGCTAGACAAAGGGTGGCGCTGGTAG		MLDKGWRW*		MLDKGWRW*		TTTGGCACCA	TGGTCCGCCA	0	WV	0	0	0	0	0
141	109	af	AN2928.1	59.m09067	AO070337000181	1			-298	-275			ATGAGACTGGGGAGTGCTTTCTAG		ATGAGACTGGGGAGTGCTTTCTAG		MRLGSAF*		MRLGSAF*		CCAATCGTGT	TCTCTCCATC	0	WV	0	0	0	0	0
142	109	af	AN2928.1	59.m09067	AO070337000181	1			-264	-232			ATGGCCGGCCATACTTGCATCCCCCAGGGGTAG		ATGGCCGGCCATACTTGCATCCCCCAGGGGTAG		MAGHTCIPQG*		MAGHTCIPQG*		TCTCTCCATC	TATATATACC	0	WV	0	0	0	0	0
143	109	af	AN2928.1	59.m09067	AO070337000181	1			-215	-195			ATGATCTACCTTTCCGATTGA		ATGATCTACCTTTCCGATTGA		MIYLSD*		MIYLSD*		TACCTGGATA	TCATCAACTC	0	WV	0	0	0	0	0
148	115	an	AN8288.1	65.m07464	AO070190000002	1	-368	-348					ATGGGACTCAGAATACGTTAA	ATGGGACTCAGAATACGTTAA			MGLRIR*	MGLRIR*			TGACACACGC	TGGACTGCTT	0	U	0	0	0	0	0
149	115	an	AN8288.1	65.m07464	AO070190000002	1	-348	-316					ATGGACTGCTTATTGATACGTACTCTAGCCTAA	ATGGACTGCTTATTGATACGTACTCTAGCCTAA			MDCLLIRTLA*	MDCLLIRTLA*			GAATACGTTA	TCACTACGGA	0	U	0	0	0	0	0
150	115	an	AN8288.1	65.m07464	AO070190000002	1	-262	-218					ATGTCAAGCCGCGCTTCTGAAGGGCTGAGCAGTCGCCAGTGTTAG	ATGTCAAGCCGCGCTTCTGAAGGGCTGAGCAGTCGCCAGTGTTAG			MSSRASEGLSSRQC*	MSSRASEGLSSRQC*			CCCGTTATCG	CCAATTCAAC	0	U	0	0	0	0	0
151	115	an	AN8288.1	65.m07464	AO070190000002	1	-35	-3					ATGCTCAAAGTCATCATTCAGGATCTCAATTGA	ATGCTCAAAGTCATCATTCAGGATCTCAATTGA			MLKVIIQDLN*	MLKVIIQDLN*			GCTGCCCGCC	TAATGCCTAG	1	U	0	0	0	0	0
152	115	af	AN8288.1	65.m07464	AO070190000002	1			-299	-285			ATGAGGTCTCCTTAG		ATGAGGTCTCCTTAG		MRSP*		MRSP*		GCCCCAAAGT	GGCCTTGGCG	0	U	0	0	0	0	0
153	115	af	AN8288.1	65.m07464	AO070190000002	1			-249	-160			ATGACCTTCCATATTCATCACGAATATAACACTCAACTTACTGAGACTAATATATTATTTCCAGATACTAATATTGACTCTTTTACCTAG		ATGACCTTCCATATTCATCACGAATATAACACTCAACTTACTGAGACTAATATATTATTTCCAGATACTAATATTGACTCTTTTACCTAG		MTFHIHHEYNTQLTETNILFPDTNIDSFT*		MTFHIHHEYNTQLTETNILFPDTNIDSFT*		CCAAATCTTA	ACTAATAGTC	0	U	0	0	0	0	0
154	115	af	AN8288.1	65.m07464	AO070190000002	1			-139	-128			ATGTGCTGTTAA		ATGTGCTGTTAA		MCC*		MCC*		AAGCATTATA	TCATTTAAGT	0	U	0	0	0	0	0
155	115	ao	AN8288.1	65.m07464	AO070190000002	1					-38	-9	ATGAAAATGGTCATTAGATACGTTGGATAG			ATGAAAATGGTCATTAGATACGTTGGATAG	MKMVIRYVG*			MKMVIRYVG*	TTAAGCCTGT	CCTATAACAT	1	U	0	0	0	0	0
156	115	ao	AN8288.1	65.m07464	AO070190000002	1					-32	-9	ATGGTCATTAGATACGTTGGATAG			ATGGTCATTAGATACGTTGGATAG	MVIRYVG*			MVIRYVG*	CTGTATGAAA	CCTATAACAT	1	U	0	0	0	0	0
160	120	af	AN0668.1	70.m15271	AO070343000552	0			-57	-31			ATGCTACCTTACTGGACACGGGCTTGA		ATGCTACCTTACTGGACACGGGCTTGA		MLPYWTRA*		MLPYWTRA*		GCTTGTTTCT	TCCGTCCCGA	1	R	0	0	0	0	0
173	138	conserved	AN5627.1	58.m08920	AO070301000027	0	-33	-22	-37	-26	-34	-23	ATGAAbCywTAA	ATGAAGCTATAA	ATGAATCCTTAA	ATGAACCTATAA	Mkl*	MKL*	MNP*	MNL*	bwhhsAACvd	kmhyCrmwkw	1	YU	0	0	0	0	0
176	140	an	AN8891.1	56.m02304	AO070293000026	0	-20	-6					ATGCGCCAACGCTGA	ATGCGCCAACGCTGA			MRQR*	MRQR*			CTCGACGCGA	TCACCATGAG	1	M	0	0	0	0	0
184	141	ao	AN4461.1	58.m07863	AO070305000132	0					-54	-31	ATGGGTCTACGTCATTTTACTTAA			ATGGGTCTACGTCATTTTACTTAA	MGLRHFT*			MGLRHFT*	CCTATCTGGC	CTGTCGCGAT	1	K	0	0	0	0	0
200	150	ao	AN0287.1	54.m06482	AO070334000066	0					-56	-33	ATGATCCAAACCCAAGCAGATTGA			ATGATCCAAACCCAAGCAGATTGA	MIQTQAD*			MIQTQAD*	GTTGCGCGCA	ACACCGTCTG	1	R	0	0	0	0	0
217	166	ao	AN2105.1	57.m05806	AO070341000263	1					-220	-197	ATGCGATTAATGCCCGCACTATGA			ATGCGATTAATGCCCGCACTATGA	MRLMPAL*			MRLMPAL*	TGACTAAGCT	GTAACGTGAG	0	A	FG00358.1	MG04741.1	NCU00505.1	YGR074W	0
218	166	ao	AN2105.1	57.m05806	AO070341000263	1					-211	-197	ATGCCCGCACTATGA			ATGCCCGCACTATGA	MPAL*			MPAL*	TATGCGATTA	GTAACGTGAG	0	A	FG00358.1	MG04741.1	NCU00505.1	YGR074W	0
219	166	ao	AN2105.1	57.m05806	AO070341000263	1					-200	-174	ATGAGTAACGTGAGGATGGGTGACTAA			ATGAGTAACGTGAGGATGGGTGACTAA	MSNVRMGD*			MSNVRMGD*	TGCCCGCACT	GCAGAACCAC	0	A	FG00358.1	MG04741.1	NCU00505.1	YGR074W	0
220	166	ao	AN2105.1	57.m05806	AO070341000263	1					-185	-174	ATGGGTGACTAA			ATGGGTGACTAA	MGD*			MGD*	TAACGTGAGG	GCAGAACCAC	0	A	FG00358.1	MG04741.1	NCU00505.1	YGR074W	0
238	182	an	AN4899.1	59.m08798	AO070338000053	1	-128	-81					ATGCAGCAGAAGTTATCCAAAAGCTTGCATTCTTCTTTCTCTCTTTAG	ATGCAGCAGAAGTTATCCAAAAGCTTGCATTCTTCTTTCTCTCTTTAG			MQQKLSKSLHSSFSL*	MQQKLSKSLHSSFSL*			CAACCAACAA	TCTATTATTA	0	U	0	0	0	0	0
240	182	af	AN4899.1	59.m08798	AO070338000053	1			-99	-13			ATGCGTGCGTCTGCCAAACTCCCCTTTCACCACAGCGCTGGTCTCTCCTTTCCAGTCATTTCCTCAGAATTGTTCAGGAGTATATGA		ATGCGTGCGTCTGCCAAACTCCCCTTTCACCACAGCGCTGGTCTCTCCTTTCCAGTCATTTCCTCAGAATTGTTCAGGAGTATATGA		MRASAKLPFHHSAGLSFPVISSELFRSI*		MRASAKLPFHHSAGLSFPVISSELFRSI*		TCTTCTTCAC	CTTTCAGACA	0	U	0	0	0	0	0
270	212	af	AN1798.1	72.m19550	AO070309000133	1			-117	-49			ATGACCTCTTCTGTGGTCACTTGTTCACTTCAGCTTTCCTTCTTCCATCTTTGGCCCTGGCCAAAATGA		ATGACCTCTTCTGTGGTCACTTGTTCACTTCAGCTTTCCTTCTTCCATCTTTGGCCCTGGCCAAAATGA		MTSSVVTCSLQLSFFHLWPWPK*		MTSSVVTCSLQLSFFHLWPWPK*		AACGCTCACC	GGCCTTTTGC	0	I	0	0	0	0	0
271	212	af	AN1798.1	72.m19550	AO070309000133	1			-52	-5			ATGAGGCCTTTTGCAGTCTTTACTACATTCACATTCACAAGCCCCTGA		ATGAGGCCTTTTGCAGTCTTTACTACATTCACATTCACAAGCCCCTGA		MRPFAVFTTFTFTSP*		MRPFAVFTTFTFTSP*		CCTGGCCAAA	CACCATGTTG	1	I	0	0	0	0	0
273	214	af	AN6864.1	71.m15275	AO070314000084	0			-46	-17			ATGCCCCTCTCCCTTTCGCGGTCGCGTTAA		ATGCCCCTCTCCCTTTCGCGGTCGCGTTAA		MPLSLSRSR*		MPLSLSRSR*		AAAGTCGCCA	ATTAGTTGAG	1	J	0	0	0	0	0
276	214	ao	AN6864.1	71.m15275	AO070314000084	0					-49	-17	ATGCCCCTCCGCTCCGTCGTCATCGTCATTTAG			ATGCCCCTCCGCTCCGTCGTCATCGTCATTTAG	MPLRSVVIVI*			MPLRSVVIVI*	AAAGTCGCCA	TCCGCTTCTT	1	J	0	0	0	0	0
277	221	af	AN6588.1	62.m03177	AO070326000036	1			-197	-30			ATGATGATGATGATGATGGGAAGACTGCCTGACGTCCTTGGACTGGTCATTGACGGGAAGGGAAATGTGACAGCACGACCGCCTTTTTTTGGATTCAATACACTCGTTCATCGAATACTCGAGCTCGTTAAAGAGCCAGCAAGAATCGGTGGCGAGACGCGTCGCTAG		ATGATGATGATGATGATGGGAAGACTGCCTGACGTCCTTGGACTGGTCATTGACGGGAAGGGAAATGTGACAGCACGACCGCCTTTTTTTGGATTCAATACACTCGTTCATCGAATACTCGAGCTCGTTAAAGAGCCAGCAAGAATCGGTGGCGAGACGCGTCGCTAG		MMMMMMGRLPDVLGLVIDGKGNVTARPPFFGFNTLVHRILELVKEPARIGGETRR*		MMMMMMGRLPDVLGLVIDGKGNVTARPPFFGFNTLVHRILELVKEPARIGGETRR*		AGTGTAAGTG	GGTACACCTG	0		0	MG04986.1	0	0	0
278	221	af	AN6588.1	62.m03177	AO070326000036	1			-194	-30			ATGATGATGATGATGGGAAGACTGCCTGACGTCCTTGGACTGGTCATTGACGGGAAGGGAAATGTGACAGCACGACCGCCTTTTTTTGGATTCAATACACTCGTTCATCGAATACTCGAGCTCGTTAAAGAGCCAGCAAGAATCGGTGGCGAGACGCGTCGCTAG		ATGATGATGATGATGGGAAGACTGCCTGACGTCCTTGGACTGGTCATTGACGGGAAGGGAAATGTGACAGCACGACCGCCTTTTTTTGGATTCAATACACTCGTTCATCGAATACTCGAGCTCGTTAAAGAGCCAGCAAGAATCGGTGGCGAGACGCGTCGCTAG		MMMMMGRLPDVLGLVIDGKGNVTARPPFFGFNTLVHRILELVKEPARIGGETRR*		MMMMMGRLPDVLGLVIDGKGNVTARPPFFGFNTLVHRILELVKEPARIGGETRR*		GTAAGTGATG	GGTACACCTG	0		0	MG04986.1	0	0	0
279	221	af	AN6588.1	62.m03177	AO070326000036	1			-191	-30			ATGATGATGATGGGAAGACTGCCTGACGTCCTTGGACTGGTCATTGACGGGAAGGGAAATGTGACAGCACGACCGCCTTTTTTTGGATTCAATACACTCGTTCATCGAATACTCGAGCTCGTTAAAGAGCCAGCAAGAATCGGTGGCGAGACGCGTCGCTAG		ATGATGATGATGGGAAGACTGCCTGACGTCCTTGGACTGGTCATTGACGGGAAGGGAAATGTGACAGCACGACCGCCTTTTTTTGGATTCAATACACTCGTTCATCGAATACTCGAGCTCGTTAAAGAGCCAGCAAGAATCGGTGGCGAGACGCGTCGCTAG		MMMMGRLPDVLGLVIDGKGNVTARPPFFGFNTLVHRILELVKEPARIGGETRR*		MMMMGRLPDVLGLVIDGKGNVTARPPFFGFNTLVHRILELVKEPARIGGETRR*		AGTGATGATG	GGTACACCTG	0		0	MG04986.1	0	0	0
280	221	af	AN6588.1	62.m03177	AO070326000036	1			-188	-30			ATGATGATGGGAAGACTGCCTGACGTCCTTGGACTGGTCATTGACGGGAAGGGAAATGTGACAGCACGACCGCCTTTTTTTGGATTCAATACACTCGTTCATCGAATACTCGAGCTCGTTAAAGAGCCAGCAAGAATCGGTGGCGAGACGCGTCGCTAG		ATGATGATGGGAAGACTGCCTGACGTCCTTGGACTGGTCATTGACGGGAAGGGAAATGTGACAGCACGACCGCCTTTTTTTGGATTCAATACACTCGTTCATCGAATACTCGAGCTCGTTAAAGAGCCAGCAAGAATCGGTGGCGAGACGCGTCGCTAG		MMMGRLPDVLGLVIDGKGNVTARPPFFGFNTLVHRILELVKEPARIGGETRR*		MMMGRLPDVLGLVIDGKGNVTARPPFFGFNTLVHRILELVKEPARIGGETRR*		GATGATGATG	GGTACACCTG	0		0	MG04986.1	0	0	0
281	221	af	AN6588.1	62.m03177	AO070326000036	1			-185	-30			ATGATGGGAAGACTGCCTGACGTCCTTGGACTGGTCATTGACGGGAAGGGAAATGTGACAGCACGACCGCCTTTTTTTGGATTCAATACACTCGTTCATCGAATACTCGAGCTCGTTAAAGAGCCAGCAAGAATCGGTGGCGAGACGCGTCGCTAG		ATGATGGGAAGACTGCCTGACGTCCTTGGACTGGTCATTGACGGGAAGGGAAATGTGACAGCACGACCGCCTTTTTTTGGATTCAATACACTCGTTCATCGAATACTCGAGCTCGTTAAAGAGCCAGCAAGAATCGGTGGCGAGACGCGTCGCTAG		MMGRLPDVLGLVIDGKGNVTARPPFFGFNTLVHRILELVKEPARIGGETRR*		MMGRLPDVLGLVIDGKGNVTARPPFFGFNTLVHRILELVKEPARIGGETRR*		GATGATGATG	GGTACACCTG	0		0	MG04986.1	0	0	0
282	221	af	AN6588.1	62.m03177	AO070326000036	1			-182	-30			ATGGGAAGACTGCCTGACGTCCTTGGACTGGTCATTGACGGGAAGGGAAATGTGACAGCACGACCGCCTTTTTTTGGATTCAATACACTCGTTCATCGAATACTCGAGCTCGTTAAAGAGCCAGCAAGAATCGGTGGCGAGACGCGTCGCTAG		ATGGGAAGACTGCCTGACGTCCTTGGACTGGTCATTGACGGGAAGGGAAATGTGACAGCACGACCGCCTTTTTTTGGATTCAATACACTCGTTCATCGAATACTCGAGCTCGTTAAAGAGCCAGCAAGAATCGGTGGCGAGACGCGTCGCTAG		MGRLPDVLGLVIDGKGNVTARPPFFGFNTLVHRILELVKEPARIGGETRR*		MGRLPDVLGLVIDGKGNVTARPPFFGFNTLVHRILELVKEPARIGGETRR*		GATGATGATG	GGTACACCTG	0		0	MG04986.1	0	0	0
283	225	an	AN2288.1	71.m15935	AO070295000067	1	-91	-41					ATGTGCGCATCGTATTGGCGTCAGAAAATCGCCGCTGGAGTAAACCGCTAG	ATGTGCGCATCGTATTGGCGTCAGAAAATCGCCGCTGGAGTAAACCGCTAG			MCASYWRQKIAAGVNR*	MCASYWRQKIAAGVNR*			GTGGACTATT	GGAGCGTCAA	0	P	0	0	0	0	0
285	225	ao	AN2288.1	71.m15935	AO070295000067	1					-240	-154	ATGTGCGCCTTGGTCTGGCGCCAGAGACTCGCAGCTGGAGCTAACCGCTTGGTGTCATCCGCTGTCGTGGTTGCGTGGCCTTCGTAA			ATGTGCGCCTTGGTCTGGCGCCAGAGACTCGCAGCTGGAGCTAACCGCTTGGTGTCATCCGCTGTCGTGGTTGCGTGGCCTTCGTAA	MCALVWRQRLAAGANRLVSSAVVVAWPS*			MCALVWRQRLAAGANRLVSSAVVVAWPS*	CCAGTGGATT	GCATGGCTAG	0	P	0	0	0	0	0
308	241	an	AN5631.1	58.m08951	AO070301000030	0	-32	-12					ATGAATCGTTTCTTCCGGTAA	ATGAATCGTTTCTTCCGGTAA			MNRFFR*	MNRFFR*			CTTTTTTTAC	TTTAATCCAA	1	D	0	0	0	0	0
309	241	af	AN5631.1	58.m08951	AO070301000030	0			-27	-4			ATGACGATTTTCTCTCTGATCTAG		ATGACGATTTTCTCTCTGATCTAG		MTIFSLI*		MTIFSLI*		CTTGTTTTCC	TTCATGATGT	1	D	0	0	0	0	0
310	249	af	AN2741.1	54.m06957	AO070338000230	1			-176	-144			ATGCGCGATTTCAGAAATCCGCCGACTCGCTGA		ATGCGCGATTTCAGAAATCCGCCGACTCGCTGA		MRDFRNPPTR*		MRDFRNPPTR*		CAACGTAACC	CATCATCAAC	0	O	0	0	0	0	0
311	249	af	AN2741.1	54.m06957	AO070338000230	1			-127	-80			ATGCAACTAAATACCACCTTTGCATCTCACCAGCTCTCCAGTCAATAA		ATGCAACTAAATACCACCTTTGCATCTCACCAGCTCTCCAGTCAATAA		MQLNTTFASHQLSSQ*		MQLNTTFASHQLSSQ*		CAACCACCTC	TCAAATCACC	0	O	0	0	0	0	0
312	249	ao	AN2741.1	54.m06957	AO070338000230	1					-237	-193	ATGGACGAAATCCACACGAAGAAGAGCCTCAAGCTCTTCTTTTAG			ATGGACGAAATCCACACGAAGAAGAGCCTCAAGCTCTTCTTTTAG	MDEIHTKKSLKLFF*			MDEIHTKKSLKLFF*	AGAGCCCGCC	TTGTCCTCGC	0	O	0	0	0	0	0
318	254	af	AN0331.1	54.m06427	AO070318000004	0			-54	-31			ATGACACCAGCCTCGTTATACTAG		ATGACACCAGCCTCGTTATACTAG		MTPASLY*		MTPASLY*		TGCTCGTGAA	ATCGAATCTC	1		0	0	0	0	0
336	270	af	AN6412.1	56.m02547	AO070339000013	1			-52	-41			ATGCAGGTCTAA		ATGCAGGTCTAA		MQV*		MQV*		TTTCAGGACG	TTTCTCCATT	1	U	0	0	0	0	0
352	284	ao	AN3081.1	59.m08917	AO070224000005	1					-247	-230	ATGTCGGTACTGTTTTAA			ATGTCGGTACTGTTTTAA	MSVLF*			MSVLF*	ATATCAGACT	GATCAGCGGG	0	E	0	0	0	0	0
353	284	ao	AN3081.1	59.m08917	AO070224000005	1					-179	-117	ATGCATTCACGTCTTCGTCCATTGACACGCGTTATATTAAACTTGAGCATAAAGTGCTGTTAA			ATGCATTCACGTCTTCGTCCATTGACACGCGTTATATTAAACTTGAGCATAAAGTGCTGTTAA	MHSRLRPLTRVILNLSIKCC*			MHSRLRPLTRVILNLSIKCC*	CACAGCTGTA	CTCTCAGCGA	0	E	0	0	0	0	0
370	299	af	AN4305.1	58.m08019	AO070330000015	0			-60	-46			ATGATAACCAACTAA		ATGATAACCAACTAA		MITN*		MITN*		ATCGTCGCAT	TAGTTCCTGT	1	PD	0	0	0	0	0
375	301	an	AN1114.1	70.m15121	AO070285000024	1	-286	-245					ATGGCTGCTGCGCTGTTTTCTCTCGAGTGCGCCACCAGTTGA	ATGGCTGCTGCGCTGTTTTCTCTCGAGTGCGCCACCAGTTGA			MAAALFSLECATS*	MAAALFSLECATS*			AAAGGGTACC	GCACGGTGCC	0	K	0	0	0	0	0
376	301	an	AN1114.1	70.m15121	AO070285000024	1	-219	-118					ATGCCTGCTCGGGTACAAGGAAGAATATCCTCCCCGGTCTCATTAATATCCCGTTCTTTGCATCTCAAGGCAAGAAAATTGTACAACACCCGTGACAAGTGA	ATGCCTGCTCGGGTACAAGGAAGAATATCCTCCCCGGTCTCATTAATATCCCGTTCTTTGCATCTCAAGGCAAGAAAATTGTACAACACCCGTGACAAGTGA			MPARVQGRISSPVSLISRSLHLKARKLYNTRDK*	MPARVQGRISSPVSLISRSLHLKARKLYNTRDK*			TATACATTGG	ACCTGCCCGT	0	K	0	0	0	0	0
377	301	af	AN1114.1	70.m15121	AO070285000024	1			-432	-328			ATGTCTTCCGGCTGGTCGAATCATCTTCTCAGGAAGAGGCAGCACGCCTCTTCCTTCCGCTATCAGCACGGTATTCGCATCTACACCGTGTTTCCGGCTTGGTGA		ATGTCTTCCGGCTGGTCGAATCATCTTCTCAGGAAGAGGCAGCACGCCTCTTCCTTCCGCTATCAGCACGGTATTCGCATCTACACCGTGTTTCCGGCTTGGTGA		MSSGWSNHLLRKRQHASSFRYQHGIRIYTVFPAW*		MSSGWSNHLLRKRQHASSFRYQHGIRIYTVFPAW*		CTCTCTGCAC	ACAATGTCCC	0	K	0	0	0	0	0
378	301	af	AN1114.1	70.m15121	AO070285000024	1			-324	-310			ATGTCCCAGATTTGA		ATGTCCCAGATTTGA		MSQI*		MSQI*		TTGGTGAACA	AGTGTCTTAG	0	K	0	0	0	0	0
379	301	af	AN1114.1	70.m15121	AO070285000024	1			-265	-134			ATGAGTACAGAATACGCAATTGACCCGTTCTTAAGAGGCCTGAGGCTGCTGTCTCTTTTTCTTCGGGTTCCGTCTTTCTCTTACTCCCTTGTTGCCCGTCTCACACGTGTCTCTTCTACGGTCAATTTGTAA		ATGAGTACAGAATACGCAATTGACCCGTTCTTAAGAGGCCTGAGGCTGCTGTCTCTTTTTCTTCGGGTTCCGTCTTTCTCTTACTCCCTTGTTGCCCGTCTCACACGTGTCTCTTCTACGGTCAATTTGTAA		MSTEYAIDPFLRGLRLLSLFLRVPSFSYSLVARLTRVSSTVNL*		MSTEYAIDPFLRGLRLLSLFLRVPSFSYSLVARLTRVSSTVNL*		TTTCTCCTAT	AACGACAATT	0	K	0	0	0	0	0
380	301	ao	AN1114.1	70.m15121	AO070285000024	1					-360	-307	ATGCCGGTGCCTCTTGGATCCGTTTATCCAATTTATTCCTGTTCTATTGGGTAA			ATGCCGGTGCCTCTTGGATCCGTTTATCCAATTTATTCCTGTTCTATTGGGTAA	MPVPLGSVYPIYSCSIG*			MPVPLGSVYPIYSCSIG*	GCTCTCCACC	TCTCTCCCCA	0	K	0	0	0	0	0
381	301	ao	AN1114.1	70.m15121	AO070285000024	1					-297	-280	ATGTATCCGTACCTTTAA			ATGTATCCGTACCTTTAA	MYPYL*			MYPYL*	ATCTCTCCCC	GGGAGTTAAA	0	K	0	0	0	0	0
409	329	af	AN7950.1	52.m03642	AO070342000340	1			-127	-98			ATGTTCAATTCAGTCGTTCTCTCCCTCTAG		ATGTTCAATTCAGTCGTTCTCTCCCTCTAG		MFNSVVLSL*		MFNSVVLSL*		CTGACATCCG	GTTCATTCTT	0	G	0	0	0	0	0
413	332	an	AN5724.1	54.m06844	AO070324000127	0	-46	-26					ATGCAGTTGCCCTTAATTTGA	ATGCAGTTGCCCTTAATTTGA			MQLPLI*	MQLPLI*			TTCGTTCTGC	AAGAAGAGAC	1	OU	0	0	0	0	0
423	340	an	AN6680.1	65.m07300	AO070289000022	1	-73	-14					ATGACCAACACGCTCAACGTCGCATCGGCCGCATCAGTTACGTTTCAAGAATTGCAATAG	ATGACCAACACGCTCAACGTCGCATCGGCCGCATCAGTTACGTTTCAAGAATTGCAATAG			MTNTLNVASAASVTFQELQ*	MTNTLNVASAASVTFQELQ*			CACCCGAGAT	TGACACTTGC	0		0	0	0	0	0
424	340	af	AN6680.1	65.m07300	AO070289000022	1			-115	-104			ATGGCCGTTTAG		ATGGCCGTTTAG		MAV*		MAV*		GGTAGAGTTC	GTGCCCCGCC	0		0	0	0	0	0
425	341	af	AN5866.1	72.m19268	AO070308000130	1			-267	-124			ATGTTCTCTCATATCACCCGCATTGAGCTGCTCCACAAGTCCACTCACTCACTTTTTCTAGGCTTTCCCGCCGAACCGGAAACCCCTCTAATTTTCAGCCCTTCCCCGTCATCTCCGCCATCGCTGTTACTACGGTCTACCTAG		ATGTTCTCTCATATCACCCGCATTGAGCTGCTCCACAAGTCCACTCACTCACTTTTTCTAGGCTTTCCCGCCGAACCGGAAACCCCTCTAATTTTCAGCCCTTCCCCGTCATCTCCGCCATCGCTGTTACTACGGTCTACCTAG		MFSHITRIELLHKSTHSLFLGFPAEPETPLIFSPSPSSPPSLLLRST*		MFSHITRIELLHKSTHSLFLGFPAEPETPLIFSPSPSSPPSLLLRST*		CATTCCACTA	GTACCCGTGC	0	R	0	0	0	0	0
427	343	an	AN6277.1	72.m19363	AO070304000003	0	-37	-11					ATGCTAACGTGGGCCCGACAGTGGTGA	ATGCTAACGTGGGCCCGACAGTGGTGA			MLTWARQW*	MLTWARQW*			TATAAGGGCA	TTCAACCAAG	1	R	0	MG04158.1	NCU06519.1	0	0
455	364	af	AN7677.1	57.m05454	AO070325000067	1			-423	-385			ATGTTTCAACTCTCTATCTCGACGCAGATTCTAGCTTAG		ATGTTTCAACTCTCTATCTCGACGCAGATTCTAGCTTAG		MFQLSISTQILA*		MFQLSISTQILA*		ATGCAGCTTC	GGCATGATGG	0		0	0	0	YDR479C	0
456	364	ao	AN7677.1	57.m05454	AO070325000067	1					-44	-12	ATGTCTTTGCTTACTATCAATCTCTTTCGGTAG			ATGTCTTTGCTTACTATCAATCTCTTTCGGTAG	MSLLTINLFR*			MSLLTINLFR*	GCTGTCGGAA	CTGAATCTAT	1		0	0	0	YDR479C	0
465	369	af	AN3650.1	58.m07449	AO070328000098	1			-146	-66			ATGCTGTATTGGTATGTCTTTTCGTTCTTCGTCATTGAGGTCGTGAAACCTCCGTTCTTGCGCGTTTGTCGAGTCGCATAG		ATGCTGTATTGGTATGTCTTTTCGTTCTTCGTCATTGAGGTCGTGAAACCTCCGTTCTTGCGCGTTTGTCGAGTCGCATAG		MLYWYVFSFFVIEVVKPPFLRVCRVA*		MLYWYVFSFFVIEVVKPPFLRVCRVA*		ACGCCTTCCA	TCCCGAGAGC	0		0	0	0	0	0
466	369	af	AN3650.1	58.m07449	AO070328000098	1			-133	-101			ATGTCTTTTCGTTCTTCGTCATTGAGGTCGTGA		ATGTCTTTTCGTTCTTCGTCATTGAGGTCGTGA		MSFRSSSLRS*		MSFRSSSLRS*		CTGTATTGGT	AACCTCCGTT	0		0	0	0	0	0
467	369	ao	AN3650.1	58.m07449	AO070328000098	1					-229	-143	ATGCTCCTGGCGCTGCCTGTCTTTAATAGTTGCGTTATTGGGGTTTGGCGCCTCCTATCTGCCGACGGGTATCCAACCTTTACTTAA			ATGCTCCTGGCGCTGCCTGTCTTTAATAGTTGCGTTATTGGGGTTTGGCGCCTCCTATCTGCCGACGGGTATCCAACCTTTACTTAA	MLLALPVFNSCVIGVWRLLSADGYPTFT*			MLLALPVFNSCVIGVWRLLSADGYPTFT*	TTGCCGTCCA	TCGCAATCCG	0		0	0	0	0	0
481	387	ao	AN7754.1	71.m15786	AO070325000185	0					-58	-23	ATGCGCTACTGGATATCTCTAGTACCCGAGTACTAA			ATGCGCTACTGGATATCTCTAGTACCCGAGTACTAA	MRYWISLVPEY*			MRYWISLVPEY*	ACCCCCCTTG	TCACCGTGTG	1		0	0	0	0	0
482	390	an	AN4408.1	58.m07896	AO070273000028	1	-162	-139					ATGCGTTCATCTCTATTTATCTAA	ATGCGTTCATCTCTATTTATCTAA			MRSSLFI*	MRSSLFI*			CAATTATTGC	TTTATGTAAA	0		0	0	0	0	0
483	390	an	AN4408.1	58.m07896	AO070273000028	1	-118	-74					ATGAGGCCTCTAAACTGGTCATATCTGGCCCGATTCGCCGTCTGA	ATGAGGCCTCTAAACTGGTCATATCTGGCCCGATTCGCCGTCTGA			MRPLNWSYLARFAV*	MRPLNWSYLARFAV*			TTATAGTCAA	TCAGCCTCAA	0		0	0	0	0	0
484	390	af	AN4408.1	58.m07896	AO070273000028	1			-200	-102			ATGCTTCAAGTATGGATACCTTACTTAACAGTCCATCAACTTATTCTTGTTCTGCTCTTCTTTGATCCTATTATTGTTATAGATTGCATCTTTCTATAG		ATGCTTCAAGTATGGATACCTTACTTAACAGTCCATCAACTTATTCTTGTTCTGCTCTTCTTTGATCCTATTATTGTTATAGATTGCATCTTTCTATAG		MLQVWIPYLTVHQLILVLLFFDPIIVIDCIFL*		MLQVWIPYLTVHQLILVLLFFDPIIVIDCIFL*		AGTCTATCCG	TACTTGTGTA	0		0	0	0	0	0
485	390	af	AN4408.1	58.m07896	AO070273000028	1			-189	-136			ATGGATACCTTACTTAACAGTCCATCAACTTATTCTTGTTCTGCTCTTCTTTGA		ATGGATACCTTACTTAACAGTCCATCAACTTATTCTTGTTCTGCTCTTCTTTGA		MDTLLNSPSTYSCSALL*		MDTLLNSPSTYSCSALL*		TGCTTCAAGT	TCCTATTATT	0		0	0	0	0	0
486	390	ao	AN4408.1	58.m07896	AO070273000028	1					-278	-246	ATGATTGCCGATCATCACGGTGATTCAAACTGA			ATGATTGCCGATCATCACGGTGATTCAAACTGA	MIADHHGDSN*			MIADHHGDSN*	TTAGCGTGGT	TAGGCTATAC	0		0	0	0	0	0
489	396	ao	AN1342.1	70.m14891	AO070247000022	1					-251	-210	ATGGATATATGCAATTGTGTCGTTGGAGTTAGCTTCTACTAG			ATGGATATATGCAATTGTGTCGTTGGAGTTAGCTTCTACTAG	MDICNCVVGVSFY*			MDICNCVVGVSFY*	ATAACTTGAG	TGGAAATTGG	0	R	0	0	0	0	0
490	396	ao	AN1342.1	70.m14891	AO070247000022	1					-243	-220	ATGCAATTGTGTCGTTGGAGTTAG			ATGCAATTGTGTCGTTGGAGTTAG	MQLCRWS*			MQLCRWS*	AGATGGATAT	CTTCTACTAG	0	R	0	0	0	0	0
491	396	ao	AN1342.1	70.m14891	AO070247000022	1					-126	-49	ATGTTGGATAAATATATAATTCTCCGCAGCATACGGGTTCCGAATGTTCTAAAACCCAGACGCAACAATGGAATATGA			ATGTTGGATAAATATATAATTCTCCGCAGCATACGGGTTCCGAATGTTCTAAAACCCAGACGCAACAATGGAATATGA	MLDKYIILRSIRVPNVLKPRRNNGI*			MLDKYIILRSIRVPNVLKPRRNNGI*	ATACACAATT	TGTTTTCATT	0	R	0	0	0	0	0
492	397	an	AN3450.1	59.m09313	AO070265000025	1	-115	-50					ATGATTTATTTTCATAACAGACCTTTTCCCTCCCTTCCATACGGCGGCGAAACCCATCGAGTGTAA	ATGATTTATTTTCATAACAGACCTTTTCCCTCCCTTCCATACGGCGGCGAAACCCATCGAGTGTAA			MIYFHNRPFPSLPYGGETHRV*	MIYFHNRPFPSLPYGGETHRV*			TTGATTCTTT	TCCGGCCGCT	0	L	0	0	0	0	0
494	397	af	AN3450.1	59.m09313	AO070265000025	1			-238	-176			ATGGATCATACACAATTACATACGCGCCTACCGTGGCCATCAACCGCGAAATTGATGATTTGA		ATGGATCATACACAATTACATACGCGCCTACCGTGGCCATCAACCGCGAAATTGATGATTTGA		MDHTQLHTRLPWPSTAKLMI*		MDHTQLHTRLPWPSTAKLMI*		GACCATTTTG	GAAATCCTCG	0	L	0	0	0	0	0
495	397	af	AN3450.1	59.m09313	AO070265000025	1			-81	-67			ATGCAAGATATTTGA		ATGCAAGATATTTGA		MQDI*		MQDI*		ACCTCAGTCC	GGAACCCCTC	0	L	0	0	0	0	0
505	400	af	AN8262.1	53.m04209	AO070310000038	0			-57	-46			ATGGATCTGTGA		ATGGATCTGTGA		MDL*		MDL*		CGTTCCTTGC	AGATCCTTCG	1		0	0	0	0	0
565	429	af	AN3001.1	59.m09013	AO070337000111	1			-355	-284			ATGCGCCTTGGTTGCCCGTTGTCTACCTATTACTTACTCGCTTATTGCGTCAGACATCTATATAATTTCTGA		ATGCGCCTTGGTTGCCCGTTGTCTACCTATTACTTACTCGCTTATTGCGTCAGACATCTATATAATTTCTGA		MRLGCPLSTYYLLAYCVRHLYNF*		MRLGCPLSTYYLLAYCVRHLYNF*		AATCCAGAGT	CGCATATAAC	0	T	0	0	0	0	0
579	433	an	AN6824.1	71.m15292	AO070314000104	0	-59	-27					ATGCGGGCGAGCAGTACATGCTCTCAAGTCTAG	ATGCGGGCGAGCAGTACATGCTCTCAAGTCTAG			MRASSTCSQV*	MRASSTCSQV*			TTGTTCTAAT	GACTCGCTCT	1	G	0	0	0	YJR049C	YJR049C
587	441	an	AN7485.1	57.m05867	AO070287000048	1	-183	-148					ATGGTTGCCTTGTCACATCTGGCTTTCGGCAGCTGA	ATGGTTGCCTTGTCACATCTGGCTTTCGGCAGCTGA			MVALSHLAFGS*	MVALSHLAFGS*			CTTCGGTCTT	TCTCGTTTGC	0	R	0	0	NCU07564.1	0	0
588	441	af	AN7485.1	57.m05867	AO070287000048	1			-259	-164			ATGGCACAATCGACCAAATGGAACAACACAGCGATGATGAAGGCGAACGGTTTCTCCAGGAACAGTGTGATACTGGCAGATTTAGTAGTGACATAA		ATGGCACAATCGACCAAATGGAACAACACAGCGATGATGAAGGCGAACGGTTTCTCCAGGAACAGTGTGATACTGGCAGATTTAGTAGTGACATAA		MAQSTKWNNTAMMKANGFSRNSVILADLVVT*		MAQSTKWNNTAMMKANGFSRNSVILADLVVT*		GGACCCTCTT	CGTCAATTTC	0	R	0	0	NCU07564.1	0	0
589	441	af	AN7485.1	57.m05867	AO070287000048	1			-242	-30			ATGGAACAACACAGCGATGATGAAGGCGAACGGTTTCTCCAGGAACAGTGTGATACTGGCAGATTTAGTAGTGACATAACGTCAATTTCGGAAGATTCGGTGCAGGAAGGCGTTAGAAAAATCGAAGCGATCAATTTGACTTGGACTGCACGGTCTCTGGTCATAGCATATGTCAGGTCGGTCCCTCTGGGACACGTGCGGCGCGTCTTATAA		ATGGAACAACACAGCGATGATGAAGGCGAACGGTTTCTCCAGGAACAGTGTGATACTGGCAGATTTAGTAGTGACATAACGTCAATTTCGGAAGATTCGGTGCAGGAAGGCGTTAGAAAAATCGAAGCGATCAATTTGACTTGGACTGCACGGTCTCTGGTCATAGCATATGTCAGGTCGGTCCCTCTGGGACACGTGCGGCGCGTCTTATAA		MEQHSDDEGERFLQEQCDTGRFSSDITSISEDSVQEGVRKIEAINLTWTARSLVIAYVRSVPLGHVRRVL*		MEQHSDDEGERFLQEQCDTGRFSSDITSISEDSVQEGVRKIEAINLTWTARSLVIAYVRSVPLGHVRRVL*		AATCGACCAA	TACTGACATA	0	R	0	0	NCU07564.1	0	0
590	441	af	AN7485.1	57.m05867	AO070287000048	1			-226	-164			ATGATGAAGGCGAACGGTTTCTCCAGGAACAGTGTGATACTGGCAGATTTAGTAGTGACATAA		ATGATGAAGGCGAACGGTTTCTCCAGGAACAGTGTGATACTGGCAGATTTAGTAGTGACATAA		MMKANGFSRNSVILADLVVT*		MMKANGFSRNSVILADLVVT*		CAACACAGCG	CGTCAATTTC	0	R	0	0	NCU07564.1	0	0
591	441	af	AN7485.1	57.m05867	AO070287000048	1			-223	-164			ATGAAGGCGAACGGTTTCTCCAGGAACAGTGTGATACTGGCAGATTTAGTAGTGACATAA		ATGAAGGCGAACGGTTTCTCCAGGAACAGTGTGATACTGGCAGATTTAGTAGTGACATAA		MKANGFSRNSVILADLVVT*		MKANGFSRNSVILADLVVT*		CACAGCGATG	CGTCAATTTC	0	R	0	0	NCU07564.1	0	0
594	443	an	AN8039.1	53.m03907	AO070330000007	1	-278	-219					ATGCCCTGGCATTCATCATCTCGAGTCATGGCCATAGCTGGGCTTCGGTTGGGATGGTGA	ATGCCCTGGCATTCATCATCTCGAGTCATGGCCATAGCTGGGCTTCGGTTGGGATGGTGA			MPWHSSSRVMAIAGLRLGW*	MPWHSSSRVMAIAGLRLGW*			CGGCACGCCG	GGTGGTTCCC	0	B	FG01627.1	0	NCU05347.1	0	0
595	443	an	AN8039.1	53.m03907	AO070330000007	1	-251	-219					ATGGCCATAGCTGGGCTTCGGTTGGGATGGTGA	ATGGCCATAGCTGGGCTTCGGTTGGGATGGTGA			MAIAGLRLGW*	MAIAGLRLGW*			ATCTCGAGTC	GGTGGTTCCC	0	B	FG01627.1	0	NCU05347.1	0	0
596	443	an	AN8039.1	53.m03907	AO070330000007	1	-225	-196					ATGGTGAGGTGGTTCCCTAATCTGGACTAG	ATGGTGAGGTGGTTCCCTAATCTGGACTAG			MVRWFPNLD*	MVRWFPNLD*			TTCGGTTGGG	CGGCGTTTGA	0	B	FG01627.1	0	NCU05347.1	0	0
597	443	af	AN8039.1	53.m03907	AO070330000007	1			-259	-227			ATGCCTTCTCAGCTCGCCTTTGGAAGCATCTGA		ATGCCTTCTCAGCTCGCCTTTGGAAGCATCTGA		MPSQLAFGSI*		MPSQLAFGSI*		CTTGCTCAGT	GTCGAAGTTG	0	B	FG01627.1	0	NCU05347.1	0	0
598	443	ao	AN8039.1	53.m03907	AO070330000007	1					-318	-298	ATGCAATTGAAATCTGCTTAG			ATGCAATTGAAATCTGCTTAG	MQLKSA*			MQLKSA*	TGGATATGCA	CTGCTTTGCT	0	B	FG01627.1	0	NCU05347.1	0	0
599	443	ao	AN8039.1	53.m03907	AO070330000007	1					-225	-205	ATGATGTTCTTGGTTTCCTAA			ATGATGTTCTTGGTTTCCTAA	MMFLVS*			MMFLVS*	GAGACTTGGG	TCAGGACTAG	0	B	FG01627.1	0	NCU05347.1	0	0
600	443	ao	AN8039.1	53.m03907	AO070330000007	1					-222	-205	ATGTTCTTGGTTTCCTAA			ATGTTCTTGGTTTCCTAA	MFLVS*			MFLVS*	ACTTGGGATG	TCAGGACTAG	0	B	FG01627.1	0	NCU05347.1	0	0
601	443	ao	AN8039.1	53.m03907	AO070330000007	1					-157	-47	ATGGCTTTGACATTTCTGACTCCTTCATCCATCAACAACGCGCGTGCCGCTGGTGTATCGAATCGCTTCAACGTCCACCATCGTGCTCTATCACTTCAAACACCCGTTTGA			ATGGCTTTGACATTTCTGACTCCTTCATCCATCAACAACGCGCGTGCCGCTGGTGTATCGAATCGCTTCAACGTCCACCATCGTGCTCTATCACTTCAAACACCCGTTTGA	MALTFLTPSSINNARAAGVSNRFNVHHRALSLQTPV*			MALTFLTPSSINNARAAGVSNRFNVHHRALSLQTPV*	AGCGACCAGG	CGCGACATTT	0	B	FG01627.1	0	NCU05347.1	0	0
614	458	an	AN0315.1	54.m06443	AO070334000017	1	-164	-138					ATGACGCTGATGGATAACTGCCTTTGA	ATGACGCTGATGGATAACTGCCTTTGA			MTLMDNCL*	MTLMDNCL*			CTTCGCAGCC	GAGCCATCAT	0		0	0	0	0	0
615	458	an	AN0315.1	54.m06443	AO070334000017	1	-155	-138					ATGGATAACTGCCTTTGA	ATGGATAACTGCCTTTGA			MDNCL*	MDNCL*			CATGACGCTG	GAGCCATCAT	0		0	0	0	0	0
616	458	an	AN0315.1	54.m06443	AO070334000017	1	-65	-54					ATGCTGAATTGA	ATGCTGAATTGA			MLN*	MLN*			ACAGATCTCA	ACGAATCGGC	0		0	0	0	0	0
617	458	af	AN0315.1	54.m06443	AO070334000017	1			-346	-224			ATGTTGTCTGTCAATCTTCCTTGGCATTTTGATAGTATTGCTGTAGTATCTGTCAATTCATTGATGCGGTGTCACCATTTGCTGCGGGAGTTCCCAAACTGGCAATGGAAACCCAAGCAATGA		ATGTTGTCTGTCAATCTTCCTTGGCATTTTGATAGTATTGCTGTAGTATCTGTCAATTCATTGATGCGGTGTCACCATTTGCTGCGGGAGTTCCCAAACTGGCAATGGAAACCCAAGCAATGA		MLSVNLPWHFDSIAVVSVNSLMRCHHLLREFPNWQWKPKQ*		MLSVNLPWHFDSIAVVSVNSLMRCHHLLREFPNWQWKPKQ*		GATAGAAGGT	ATAGCTCTGC	0		0	0	0	0	0
618	458	af	AN0315.1	54.m06443	AO070334000017	1			-283	-224			ATGCGGTGTCACCATTTGCTGCGGGAGTTCCCAAACTGGCAATGGAAACCCAAGCAATGA		ATGCGGTGTCACCATTTGCTGCGGGAGTTCCCAAACTGGCAATGGAAACCCAAGCAATGA		MRCHHLLREFPNWQWKPKQ*		MRCHHLLREFPNWQWKPKQ*		CAATTCATTG	ATAGCTCTGC	0		0	0	0	0	0
619	458	af	AN0315.1	54.m06443	AO070334000017	1			-242	-54			ATGGAAACCCAAGCAATGAATAGCTCTGCATATGATATAGAATGTATTCGAGATTTGGCATCCTTGCTCCATGCTGTAATCTGCTCTTCCAATTGTATCCCTAGACGAGTTTTAATTTATTCAGAGACATATGCTAACAGCTTGTTTAGATCTACTCTATCTCATATCAAGCCCAACATGACCATATAG		ATGGAAACCCAAGCAATGAATAGCTCTGCATATGATATAGAATGTATTCGAGATTTGGCATCCTTGCTCCATGCTGTAATCTGCTCTTCCAATTGTATCCCTAGACGAGTTTTAATTTATTCAGAGACATATGCTAACAGCTTGTTTAGATCTACTCTATCTCATATCAAGCCCAACATGACCATATAG		METQAMNSSAYDIECIRDLASLLHAVICSSNCIPRRVLIYSETYANSLFRSTLSHIKPNMTI*		METQAMNSSAYDIECIRDLASLLHAVICSSNCIPRRVLIYSETYANSLFRSTLSHIKPNMTI*		CAAACTGGCA	ACCACTTTTA	0		0	0	0	0	0
620	458	af	AN0315.1	54.m06443	AO070334000017	1			-227	-54			ATGAATAGCTCTGCATATGATATAGAATGTATTCGAGATTTGGCATCCTTGCTCCATGCTGTAATCTGCTCTTCCAATTGTATCCCTAGACGAGTTTTAATTTATTCAGAGACATATGCTAACAGCTTGTTTAGATCTACTCTATCTCATATCAAGCCCAACATGACCATATAG		ATGAATAGCTCTGCATATGATATAGAATGTATTCGAGATTTGGCATCCTTGCTCCATGCTGTAATCTGCTCTTCCAATTGTATCCCTAGACGAGTTTTAATTTATTCAGAGACATATGCTAACAGCTTGTTTAGATCTACTCTATCTCATATCAAGCCCAACATGACCATATAG		MNSSAYDIECIRDLASLLHAVICSSNCIPRRVLIYSETYANSLFRSTLSHIKPNMTI*		MNSSAYDIECIRDLASLLHAVICSSNCIPRRVLIYSETYANSLFRSTLSHIKPNMTI*		AACCCAAGCA	ACCACTTTTA	0		0	0	0	0	0
621	458	af	AN0315.1	54.m06443	AO070334000017	1			-201	-139			ATGTATTCGAGATTTGGCATCCTTGCTCCATGCTGTAATCTGCTCTTCCAATTGTATCCCTAG		ATGTATTCGAGATTTGGCATCCTTGCTCCATGCTGTAATCTGCTCTTCCAATTGTATCCCTAG		MYSRFGILAPCCNLLFQLYP*		MYSRFGILAPCCNLLFQLYP*		ATGATATAGA	ACGAGTTTTA	0		0	0	0	0	0
622	458	af	AN0315.1	54.m06443	AO070334000017	1			-112	-62			ATGCTAACAGCTTGTTTAGATCTACTCTATCTCATATCAAGCCCAACATGA		ATGCTAACAGCTTGTTTAGATCTACTCTATCTCATATCAAGCCCAACATGA		MLTACLDLLYLISSPT*		MLTACLDLLYLISSPT*		TCAGAGACAT	CCATATAGAC	0		0	0	0	0	0
623	458	af	AN0315.1	54.m06443	AO070334000017	1			-65	-54			ATGACCATATAG		ATGACCATATAG		MTI*		MTI*		CAAGCCCAAC	ACCACTTTTA	0		0	0	0	0	0
624	458	ao	AN0315.1	54.m06443	AO070334000017	1					-188	-171	ATGGTAAGATCGTATTGA			ATGGTAAGATCGTATTGA	MVRSY*			MVRSY*	GGCCTAATTT	CATTGAATCA	0		0	0	0	0	0
625	458	ao	AN0315.1	54.m06443	AO070334000017	1					-50	-39	ATGACCGTCTAG			ATGACCGTCTAG	MTV*			MTV*	GACTAGAACC	CAGCAGCGTC	1		0	0	0	0	0
632	460	ao	AN4206.1	54.m06765	AO070231000018	1					-36	-13	ATGATCAATTTATGTATTCATTGA			ATGATCAATTTATGTATTCATTGA	MINLCIH*			MINLCIH*	ACAAGTTTGG	GTTGTCCAAA	1	A	0	0	0	0	0
642	464	an	AN0082.1	71.m15360	AO070311000135	1	-285	-271					ATGAAACACCGTTGA	ATGAAACACCGTTGA			MKHR*	MKHR*			CGGGGCACAG	GTTGTCACAA	0	T	0	0	0	0	0
643	464	an	AN0082.1	71.m15360	AO070311000135	1	-66	-43					ATGCTGCAGACCTTACGTATATAA	ATGCTGCAGACCTTACGTATATAA			MLQTLRI*	MLQTLRI*			CTGCTCACGG	GTGTTTCACC	0	T	0	0	0	0	0
648	466	af	AN4505.1	57.m05626	AO070311000058	1			-29	-9			ATGACAGCATATCCTATATAA		ATGACAGCATATCCTATATAA		MTAYPI*		MTAYPI*		TTACCATCTT	ACATCACCAT	1	R	0	0	0	0	0
656	472	af	AN9090.1	66.m04770	AO070332000188	1			-59	-6			ATGTTCCCAGATAGCATTAACGCGATTCCCATCTTTACGACTGTCGGAGTTTAG		ATGTTCCCAGATAGCATTAACGCGATTCCCATCTTTACGACTGTCGGAGTTTAG		MFPDSINAIPIFTTVGV*		MFPDSINAIPIFTTVGV*		ACTAATTACT	TCAACATGTC	1	R	0	0	0	0	0
673	485	an	AN8293.1	52.m04044	AO070274000002	0	-41	-21					ATGTTGAACCAATTTAGGTAG	ATGTTGAACCAATTTAGGTAG			MLNQFR*	MLNQFR*			AAAAACTTCA	TGAATAGTAC	1	R	0	MG06038.1	NCU07011.1	YLR409C	YLR409C
674	485	af	AN8293.1	52.m04044	AO070274000002	0			-31	-5			ATGCTACGGAGACCCGACCCGAATTAA		ATGCTACGGAGACCCGACCCGAATTAA		MLRRPDPN*		MLRRPDPN*		GAAACTGGTA	CATGATGCCT	1	R	0	MG06038.1	NCU07011.1	YLR409C	YLR409C
680	492	ao	AN8710.1	62.m03358	AO070315000137	0					-45	-31	ATGCGCCATCAATAA			ATGCGCCATCAATAA	MRHQ*			MRHQ*	TCTTTCTTTT	TCGATTAACT	1	S	0	0	0	0	0
693	513	an	AN6881.1	55.m03218	AO070342000371	1	-54	-31					ATGTATCTCTGGAGGACGTCCTAA	ATGTATCTCTGGAGGACGTCCTAA			MYLWRTS*	MYLWRTS*			GCTCTTATTT	ACCTCAAAAT	1		0	0	0	0	0
698	516	conserved	AN5151.1	69.m14882	AO070237000013	1	-48	-37	-365	-354	-101	-90	ATGydsvTTTGA	ATGTACCTTTGA	ATGCGGGTTTGA	ATGCTGATTTGA	Myl*	MYL*	MRV*	MLI*	mhhsmAGrhy	TmTbsmmdwd	0	RT	0	0	0	0	0
711	522	an	AN1559.1	55.m03275	AO070339000294	1	-76	-50					ATGGATATACTGTTGACATATACTTGA	ATGGATATACTGTTGACATATACTTGA			MDILLTYT*	MDILLTYT*			GAAACCTGCG	ATTGAACACA	0	R	0	0	0	0	0
712	522	ao	AN1559.1	55.m03275	AO070339000294	1					-241	-191	ATGGACTTGTGCTACCCGCTTATTTCCTCACTCCCTATCCTTAACTTGTAA			ATGGACTTGTGCTACCCGCTTATTTCCTCACTCCCTATCCTTAACTTGTAA	MDLCYPLISSLPILNL*			MDLCYPLISSLPILNL*	TTTGAGAGTC	CTCTTCTTCG	0	R	0	0	0	0	0
713	533	an	AN5527.1	69.m15430	AO070341000362	1	-324	-211					ATGTTATTCCACCAGCAAAATATAATCCCCTCCAGCCGCGAGTCCGAACGATATCCTTGGCGACTGTCCACGATGAGACTCCCGGGCAAGCGTCAAGCTGTGCTCGGCATTTGA	ATGTTATTCCACCAGCAAAATATAATCCCCTCCAGCCGCGAGTCCGAACGATATCCTTGGCGACTGTCCACGATGAGACTCCCGGGCAAGCGTCAAGCTGTGCTCGGCATTTGA			MLFHQQNIIPSSRESERYPWRLSTMRLPGKRQAVLGI*	MLFHQQNIIPSSRESERYPWRLSTMRLPGKRQAVLGI*			TCTCTAGCAC	TGAATTCTGT	0	L	0	0	0	0	0
714	533	an	AN5527.1	69.m15430	AO070341000362	1	-252	-211					ATGAGACTCCCGGGCAAGCGTCAAGCTGTGCTCGGCATTTGA	ATGAGACTCCCGGGCAAGCGTCAAGCTGTGCTCGGCATTTGA			MRLPGKRQAVLGI*	MRLPGKRQAVLGI*			ACTGTCCACG	TGAATTCTGT	0	L	0	0	0	0	0
715	533	an	AN5527.1	69.m15430	AO070341000362	1	-211	-125					ATGAATTCTGTTGGGGAGGAAACTGTCCAGCTGGCAATTCCGCCTAAGGCCCCAGCAAGCCAAAGTTTATATAGAGCACAATTTTGA	ATGAATTCTGTTGGGGAGGAAACTGTCCAGCTGGCAATTCCGCCTAAGGCCCCAGCAAGCCAAAGTTTATATAGAGCACAATTTTGA			MNSVGEETVQLAIPPKAPASQSLYRAQF*	MNSVGEETVQLAIPPKAPASQSLYRAQF*			TCGGCATTTG	GGGTTGGTGG	0	L	0	0	0	0	0
718	533	ao	AN5527.1	69.m15430	AO070341000362	1					-491	-474	ATGGCTCCTCCGAAATAA			ATGGCTCCTCCGAAATAA	MAPPK*			MAPPK*	AGCACAGGTT	AGCCCCCTCC	0	L	0	0	0	0	0
719	533	ao	AN5527.1	69.m15430	AO070341000362	1					-424	-383	ATGACGCTCCCGGGCGTGAGTCAAGTTGCGTTCGGCATTTGA			ATGACGCTCCCGGGCGTGAGTCAAGTTGCGTTCGGCATTTGA	MTLPGVSQVAFGI*			MTLPGVSQVAFGI*	ACGGTCCAAG	TAAACTCAGT	0	L	0	0	0	0	0
745	550	ao	AN5596.1	58.m07520	AO070328000008	0					-31	-11	ATGTTGAAGAGAAATAACTAG			ATGTTGAAGAGAAATAACTAG	MLKRNN*			MLKRNN*	TAGAGGAATT	CCCTCCCATC	1	R	0	0	0	0	0
763	565	af	AN0768.1	70.m15371	AO070316000076	0			-34	-23			ATGTTTCTGTAA		ATGTTTCTGTAA		MFL*		MFL*		TCTTGTGTAT	AGAGAAGTTA	1	M	0	0	0	0	0
771	570	ao	AN3020.1	59.m09444	AO070337000094	0					-54	-28	ATGTTCCTTCTGAAGCGGGTTGACTAG			ATGTTCCTTCTGAAGCGGGTTGACTAG	MFLLKRVD*			MFLLKRVD*	ATCTCCCGGT	GCTTTATCTG	1	O	0	0	0	0	0
791	586	af	AN2750.1	54.m06682	AO070338000222	0			-31	-17			ATGAGCAGTGGCTGA		ATGAGCAGTGGCTGA		MSSG*		MSSG*		GAAACCTCCA	GCCTTTTGTG	1		0	0	0	0	0
796	610	an	AN5790.1	69.m14806	AO070249000036	1	-188	-174					ATGATCCTTAGATAA	ATGATCCTTAGATAA			MILR*	MILR*			GCAGATTGAG	GATCGGGCCG	0	E	FG05733.1	MG01995.1	0	0	0
797	610	af	AN5790.1	69.m14806	AO070249000036	1			-269	-237			ATGATATTATGGCGCGGAGAGGGGGAAAGATAA		ATGATATTATGGCGCGGAGAGGGGGAAAGATAA		MILWRGEGER*		MILWRGEGER*		TTGAGGACTG	GATCGGGCCG	0	E	FG05733.1	MG01995.1	0	0	0
798	610	af	AN5790.1	69.m14806	AO070249000036	1			-261	-160			ATGGCGCGGAGAGGGGGAAAGATAAGATCGGGCCGTGTTCTGAGACAGGTTGGTGCGCAAATTATACATGGAAGGACGGCACCTTGGTGGATGCCGAGATGA		ATGGCGCGGAGAGGGGGAAAGATAAGATCGGGCCGTGTTCTGAGACAGGTTGGTGCGCAAATTATACATGGAAGGACGGCACCTTGGTGGATGCCGAGATGA		MARRGGKIRSGRVLRQVGAQIIHGRTAPWWMPR*		MARRGGKIRSGRVLRQVGAQIIHGRTAPWWMPR*		TGATGATATT	TCCGCCGTTT	0	E	FG05733.1	MG01995.1	0	0	0
799	610	af	AN5790.1	69.m14806	AO070249000036	1			-171	-160			ATGCCGAGATGA		ATGCCGAGATGA		MPR*		MPR*		ACCTTGGTGG	TCCGCCGTTT	0	E	FG05733.1	MG01995.1	0	0	0
800	610	af	AN5790.1	69.m14806	AO070249000036	1			-163	-107			ATGATCCGCCGTTTTTTCCGGCGCCCCCTTCTTGTGGCCCTGCATCTCGTTTTCTAA		ATGATCCGCCGTTTTTTCCGGCGCCCCCTTCTTGTGGCCCTGCATCTCGTTTTCTAA		MIRRFFRRPLLVALHLVF*		MIRRFFRRPLLVALHLVF*		GGATGCCGAG	CTCCATCTGT	0	E	FG05733.1	MG01995.1	0	0	0
801	610	ao	AN5790.1	69.m14806	AO070249000036	1					-247	-236	ATGGGACCCTAA			ATGGGACCCTAA	MGP*			MGP*	TAATTGAGTG	AGATAAGATC	0	E	FG05733.1	MG01995.1	0	0	0
802	610	ao	AN5790.1	69.m14806	AO070249000036	1					-187	-2	ATGGATGCCGAGACGATCCGCCGTTTTTTCCGGCGTCTCGTGCACTCCCTGTCCTTAGCCTTGGCCGCCTTTCTTTCCCGTCCTCCGTCTCTCTTCCCTCTGCACGCCTTTTTCTCTCCTCTAGCTAGATTCGCTTTTCGCCTCTCTCCTCTCCCTCCCTTCCCCCACCCCCTGGTTCATTGTTAA			ATGGATGCCGAGACGATCCGCCGTTTTTTCCGGCGTCTCGTGCACTCCCTGTCCTTAGCCTTGGCCGCCTTTCTTTCCCGTCCTCCGTCTCTCTTCCCTCTGCACGCCTTTTTCTCTCCTCTAGCTAGATTCGCTTTTCGCCTCTCTCCTCTCCCTCCCTTCCCCCACCCCCTGGTTCATTGTTAA	MDAETIRRFFRRLVHSLSLALAAFLSRPPSLFPLHAFFSPLARFAFRLSPLPPFPHPLVHC*			MDAETIRRFFRRLVHSLSLALAAFLSRPPSLFPLHAFFSPLARFAFRLSPLPPFPHPLVHC*	GTTGGCTTTC	GATGTTTTCC	0	E	FG05733.1	MG01995.1	0	0	0
803	610	ao	AN5790.1	69.m14806	AO070249000036	1					-183	-130	ATGCCGAGACGATCCGCCGTTTTTTCCGGCGTCTCGTGCACTCCCTGTCCTTAG			ATGCCGAGACGATCCGCCGTTTTTTCCGGCGTCTCGTGCACTCCCTGTCCTTAG	MPRRSAVFSGVSCTPCP*			MPRRSAVFSGVSCTPCP*	GCTTTCATGG	CCTTGGCCGC	0	E	FG05733.1	MG01995.1	0	0	0
812	613	af	AN2919.1	59.m09077	AO070337000216	1			-663	-613			ATGCTCAACTTGGCCCTCCCTCCTATCCTCGATATTCGCTTTTTGAAGTGA		ATGCTCAACTTGGCCCTCCCTCCTATCCTCGATATTCGCTTTTTGAAGTGA		MLNLALPPILDIRFLK*		MLNLALPPILDIRFLK*		CCTTACCTGT	TTCTTAACGT	0	R	0	0	0	0	0
813	613	af	AN2919.1	59.m09077	AO070337000216	1			-289	-212			ATGTGTTTGCACCTTCGGTTTAGATTTTATGCTTTTCATCGGGTGCTTCATCCTCGTTGCTTGTCTGGGATTAAATAG		ATGTGTTTGCACCTTCGGTTTAGATTTTATGCTTTTCATCGGGTGCTTCATCCTCGTTGCTTGTCTGGGATTAAATAG		MCLHLRFRFYAFHRVLHPRCLSGIK*		MCLHLRFRFYAFHRVLHPRCLSGIK*		TCATCACGGT	CTAATTCTTG	0	R	0	0	0	0	0
817	613	ao	AN2919.1	59.m09077	AO070337000216	0					-56	-45	ATGGACCACTAG			ATGGACCACTAG	MDH*			MDH*	CTACTTATCA	ACATTTAAAT	1	R	0	0	0	0	0
828	630	an	AN6166.1	72.m19013	AO070340000049	1	-200	-177					ATGGCAGCTTCTCCCAGTTCATAA	ATGGCAGCTTCTCCCAGTTCATAA			MAASPSS*	MAASPSS*			CTGTGAACGG	TCCCATTTCT	0	K	0	0	0	0	0
829	630	an	AN6166.1	72.m19013	AO070340000049	1	-122	-96					ATGCTAAAGTTTGAAAGTCAGGTCTAG	ATGCTAAAGTTTGAAAGTCAGGTCTAG			MLKFESQV*	MLKFESQV*			AAACGGAGAT	TACCTCATTA	0	K	0	0	0	0	0
830	630	af	AN6166.1	72.m19013	AO070340000049	1			-135	-115			ATGTCCCTCGTCTCTCGTTAA		ATGTCCCTCGTCTCTCGTTAA		MSLVSR*		MSLVSR*		ACGGAAAAGA	AGCTCTGTCC	0	K	0	0	0	0	0
831	630	ao	AN6166.1	72.m19013	AO070340000049	1					-819	-799	ATGCTACTCGTTTTGCGCTGA			ATGCTACTCGTTTTGCGCTGA	MLLVLR*			MLLVLR*	AAAAAAAGCC	CCTTAGTACG	0	K	0	0	0	0	0
835	640	af	AN4324.1	58.m07999	AO070240000001	1			-103	-80			ATGCTCTGTCTGAGCTTCGGTTAA		ATGCTCTGTCTGAGCTTCGGTTAA		MLCLSFG*		MLCLSFG*		CCTCGGTTCT	TCTTTCCAAA	0		0	0	0	0	0
876	660	af	AN4732.1	71.m15501	AO070323000052	1			-202	-164			ATGTATTCGTCGGTTGCCTCCTTCCCACACCTCGTTTAA		ATGTATTCGTCGGTTGCCTCCTTCCCACACCTCGTTTAA		MYSSVASFPHLV*		MYSSVASFPHLV*		GATTTCTTGA	AGCGACTCTC	0		0	0	0	0	0
877	660	ao	AN4732.1	71.m15501	AO070323000052	1					-554	-525	ATGGCCCCCTTCATCCTTCTCCCGAAATAG			ATGGCCCCCTTCATCCTTCTCCCGAAATAG	MAPFILLPK*			MAPFILLPK*	CGTCGGTCGC	AACCACTCCG	0		0	0	0	0	0
878	665	an	AN4515.1	57.m05614	AO070311000076	0	-39	-19					ATGATTCTCGGCCTATCCTGA	ATGATTCTCGGCCTATCCTGA			MILGLS*	MILGLS*			TTCTCTGTAT	CCCCATCACG	1	G	0	0	0	0	0
887	677	an	AN4071.1	54.m06996	AO070342000060	1	-332	-315					ATGCAGTCATCCAACTGA	ATGCAGTCATCCAACTGA			MQSSN*	MQSSN*			TAGCACCATT	TCTTAACCGT	0	I	0	0	0	0	0
888	677	an	AN4071.1	54.m06996	AO070342000060	1	-280	-236					ATGCTGACAATGGGCACTCTTTGTTCAGTTCATGGGAAGAAATGA	ATGCTGACAATGGGCACTCTTTGTTCAGTTCATGGGAAGAAATGA			MLTMGTLCSVHGKK*	MLTMGTLCSVHGKK*			ACTTTTCAGC	TGTGTCCGAC	0	I	0	0	0	0	0
889	677	an	AN4071.1	54.m06996	AO070342000060	1	-271	-236					ATGGGCACTCTTTGTTCAGTTCATGGGAAGAAATGA	ATGGGCACTCTTTGTTCAGTTCATGGGAAGAAATGA			MGTLCSVHGKK*	MGTLCSVHGKK*			CATGCTGACA	TGTGTCCGAC	0	I	0	0	0	0	0
890	677	an	AN4071.1	54.m06996	AO070342000060	1	-249	-184					ATGGGAAGAAATGATGTGTCCGACGTGATGCTCAAGTTGCGAAACCTCGCTTGCGGCGTATCGTAA	ATGGGAAGAAATGATGTGTCCGACGTGATGCTCAAGTTGCGAAACCTCGCTTGCGGCGTATCGTAA			MGRNDVSDVMLKLRNLACGVS*	MGRNDVSDVMLKLRNLACGVS*			TGTTCAGTTC	TCAAACCTCA	0	I	0	0	0	0	0
891	677	an	AN4071.1	54.m06996	AO070342000060	1	-239	-222					ATGATGTGTCCGACGTGA	ATGATGTGTCCGACGTGA			MMCPT*	MMCPT*			ATGGGAAGAA	TGCTCAAGTT	0	I	0	0	0	0	0
892	677	an	AN4071.1	54.m06996	AO070342000060	1	-236	-222					ATGTGTCCGACGTGA	ATGTGTCCGACGTGA			MCPT*	MCPT*			GGAAGAAATG	TGCTCAAGTT	0	I	0	0	0	0	0
893	677	an	AN4071.1	54.m06996	AO070342000060	1	-222	-184					ATGCTCAAGTTGCGAAACCTCGCTTGCGGCGTATCGTAA	ATGCTCAAGTTGCGAAACCTCGCTTGCGGCGTATCGTAA			MLKLRNLACGVS*	MLKLRNLACGVS*			GTCCGACGTG	TCAAACCTCA	0	I	0	0	0	0	0
894	677	an	AN4071.1	54.m06996	AO070342000060	1	-139	-68					ATGGTCATTTTTACCACCACAATTGTTGGCACTAACCTGGCAATTATCGCAACTTTGATCGCAGTTCTTTGA	ATGGTCATTTTTACCACCACAATTGTTGGCACTAACCTGGCAATTATCGCAACTTTGATCGCAGTTCTTTGA			MVIFTTTIVGTNLAIIATLIAVL*	MVIFTTTIVGTNLAIIATLIAVL*			CCTGGTCTTG	GAGAGTAGGG	0	I	0	0	0	0	0
895	677	af	AN4071.1	54.m06996	AO070342000060	1			-341	-321			ATGTCCGCAGCGCAAGAATAA		ATGTCCGCAGCGCAAGAATAA		MSAAQE*		MSAAQE*		GGCGATTGCA	CTAGATTTAG	0	I	0	0	0	0	0
896	677	af	AN4071.1	54.m06996	AO070342000060	1			-250	-239			ATGGTATGGTGA		ATGGTATGGTGA		MVW*		MVW*		GCCAAATTCT	TCCGCTCGGT	0	I	0	0	0	0	0
897	677	af	AN4071.1	54.m06996	AO070342000060	1			-245	-222			ATGGTGATCCGCTCGGTTGCGTGA		ATGGTGATCCGCTCGGTTGCGTGA		MVIRSVA*		MVIRSVA*		ATTCTATGGT	TCCGCTCGCT	0	I	0	0	0	0	0
898	677	ao	AN4071.1	54.m06996	AO070342000060	1					-479	-429	ATGTGTTGTTTACCTACAACTTTACTGACTAATAATTACTTTACTCCATGA			ATGTGTTGTTTACCTACAACTTTACTGACTAATAATTACTTTACTCCATGA	MCCLPTTLLTNNYFTP*			MCCLPTTLLTNNYFTP*	TCAAAATGAA	ATACCAAACA	0	I	0	0	0	0	0
899	677	ao	AN4071.1	54.m06996	AO070342000060	1					-432	-403	ATGAATACCAAACAAAGAGGCGAAATTTAG			ATGAATACCAAACAAAGAGGCGAAATTTAG	MNTKQRGEI*			MNTKQRGEI*	ACTTTACTCC	AGCTAGTTCA	0	I	0	0	0	0	0
900	677	ao	AN4071.1	54.m06996	AO070342000060	1					-393	-301	ATGTTATTTTCTACTGGCTTCTCACGAGACCACGGTGGAACCCAAAGGATGCCGATTATTACTCGGTTTGGGGGTTTGTTTATGATTTTATGA			ATGTTATTTTCTACTGGCTTCTCACGAGACCACGGTGGAACCCAAAGGATGCCGATTATTACTCGGTTTGGGGGTTTGTTTATGATTTTATGA	MLFSTGFSRDHGGTQRMPIITRFGGLFMIL*			MLFSTGFSRDHGGTQRMPIITRFGGLFMIL*	GAGCTAGTTC	CTGCTCATCT	0	I	0	0	0	0	0
901	677	ao	AN4071.1	54.m06996	AO070342000060	1					-345	-301	ATGCCGATTATTACTCGGTTTGGGGGTTTGTTTATGATTTTATGA			ATGCCGATTATTACTCGGTTTGGGGGTTTGTTTATGATTTTATGA	MPIITRFGGLFMIL*			MPIITRFGGLFMIL*	AACCCAAAGG	CTGCTCATCT	0	I	0	0	0	0	0
902	677	ao	AN4071.1	54.m06996	AO070342000060	1					-312	-301	ATGATTTTATGA			ATGATTTTATGA	MIL*			MIL*	GGGTTTGTTT	CTGCTCATCT	0	I	0	0	0	0	0
903	677	ao	AN4071.1	54.m06996	AO070342000060	1					-304	-128	ATGACTGCTCATCTTGCCTTGGCCTGTGGAGTCTCGGTGGTTTTTGTTCTCCACAAACAGCAGTCGAACGTGTCTCATCGTTGTGACAGAACAGGGACCATCGTCAGTGTAAGTAATGCGAATACGAGGTTTCACCTGCGGGCAAAGTCCAGATCGCGTCCTGGAACCATTCCATGA			ATGACTGCTCATCTTGCCTTGGCCTGTGGAGTCTCGGTGGTTTTTGTTCTCCACAAACAGCAGTCGAACGTGTCTCATCGTTGTGACAGAACAGGGACCATCGTCAGTGTAAGTAATGCGAATACGAGGTTTCACCTGCGGGCAAAGTCCAGATCGCGTCCTGGAACCATTCCATGA	MTAHLALACGVSVVFVLHKQQSNVSHRCDRTGTIVSVSNANTRFHLRAKSRSRPGTIP*			MTAHLALACGVSVVFVLHKQQSNVSHRCDRTGTIVSVSNANTRFHLRAKSRSRPGTIP*	TTATGATTTT	GCAAAACAAA	0	I	0	0	0	0	0
904	677	ao	AN4071.1	54.m06996	AO070342000060	1					-189	-16	ATGCGAATACGAGGTTTCACCTGCGGGCAAAGTCCAGATCGCGTCCTGGAACCATTCCATGAGCAAAACAAACCCCAGAGTGGTGTGCTGTCTGTCGAACTAGTCTTTTCAAGTTTTTTTTTGATCTTCAATCAATTTCCCTCCGCCCATCATCTGCGGGTTCCCTCCACGTAG			ATGCGAATACGAGGTTTCACCTGCGGGCAAAGTCCAGATCGCGTCCTGGAACCATTCCATGAGCAAAACAAACCCCAGAGTGGTGTGCTGTCTGTCGAACTAGTCTTTTCAAGTTTTTTTTTGATCTTCAATCAATTTCCCTCCGCCCATCATCTGCGGGTTCCCTCCACGTAG	MRIRGFTCGQSPDRVLEPFHEQNKPQSGVLSVELVFSSFFLIFNQFPSAHHLRVPST*			MRIRGFTCGQSPDRVLEPFHEQNKPQSGVLSVELVFSSFFLIFNQFPSAHHLRVPST*	AGTGTAAGTA	GGGACAAGAA	0	I	0	0	0	0	0
905	677	ao	AN4071.1	54.m06996	AO070342000060	1					-131	-87	ATGAGCAAAACAAACCCCAGAGTGGTGTGCTGTCTGTCGAACTAG			ATGAGCAAAACAAACCCCAGAGTGGTGTGCTGTCTGTCGAACTAG	MSKTNPRVVCCLSN*			MSKTNPRVVCCLSN*	GAACCATTCC	TCTTTTCAAG	0	I	0	0	0	0	0
920	690	an	AN6119.1	72.m19041	AO070340000085	0	-27	-16					ATGGCTTATTGA	ATGGCTTATTGA			MAY*	MAY*			TGACAGAACC	TACGAGTGTC	1	S	FG01898.1	0	0	YHR132C	YHR132C
923	690	af	AN6119.1	72.m19041	AO070340000085	0			-37	-26			ATGACAGCATAA		ATGACAGCATAA		MTA*		MTA*		GACAGAAACA	TTGTTGTCTC	1	S	FG01898.1	0	0	YHR132C	YHR132C
930	690	ao	AN6119.1	72.m19041	AO070340000085	0					-45	-28	ATGAAGATTTTGGCATAG			ATGAAGATTTTGGCATAG	MKILA*			MKILA*	GGATCTGACA	CTTTTCTGCG	1	S	FG01898.1	0	0	YHR132C	YHR132C
937	694	an	AN3035.1	59.m08982	AO070337000077	0	-60	-40					ATGCCTCCCTCGAGTCTGTGA	ATGCCTCCCTCGAGTCTGTGA			MPPSSL*	MPPSSL*			TATCCCACTG	AAAACACGAG	1	L	0	0	0	0	0
943	694	ao	AN3035.1	59.m08982	AO070337000077	0					-54	-34	ATGTTCAACTTGACGACCTAA			ATGTTCAACTTGACGACCTAA	MFNLTT*			MFNLTT*	CCCGTTTTGG	CGAGGAGCAG	1	L	0	0	0	0	0
955	699	an	AN0476.1	54.m06594	AO070328000164	0	-54	-31					ATGATAACTGTTATTCCAAGGTGA	ATGATAACTGTTATTCCAAGGTGA			MITVIPR*	MITVIPR*			ATCTCCGTCG	ATTTGTTCGT	1	J	0	0	0	0	0
958	700	conserved	AN8076.1	53.m03929	AO070330000034	0	-11		-11		-11		ATGryCyGGTGA	ATGGTCCGGTGA	ATGACCTGGTGA	ATGACCTGGTGA	Mvr*	MVR*	MTW*	MTW*	myyTTywrky	TGTCTkCrCG	1	A	0	0	0	0	0
966	700	af	AN8076.1	53.m03929	AO070330000034	1			-899	-864			ATGTTGCATCTCCATTTTTCATGCTCGGCGAGCTAA		ATGTTGCATCTCCATTTTTCATGCTCGGCGAGCTAA		MLHLHFSCSAS*		MLHLHFSCSAS*		AATTTAATAC	AGTGAAGGAT	0	A	0	0	0	0	0
967	700	af	AN8076.1	53.m03929	AO070330000034	1			-879	-859			ATGCTCGGCGAGCTAAAGTGA		ATGCTCGGCGAGCTAAAGTGA		MLGELK*		MLGELK*		TCCATTTTTC	AGGATCACCT	0	A	0	0	0	0	0
977	709	an	AN7770.1	71.m15812	AO070286000023	0	-57	-19					ATGCCCATCCTACACTTGCCTCATACTCATTCCTTTTGA	ATGCCCATCCTACACTTGCCTCATACTCATTCCTTTTGA			MPILHLPHTHSF*	MPILHLPHTHSF*			TTTCAGGTTT	TTTCTGTGAC	1	R	FG00407.1	MG05138.1	NCU07958.1	0	0
979	710	an	AN3071.1	59.m08927	AO070337000003	0	-47	-18					ATGCCGGTTACGTTTCACCTGAGTTCATGA	ATGCCGGTTACGTTTCACCTGAGTTCATGA			MPVTFHLSS*	MPVTFHLSS*			AAACGCGTGG	TAGATCTCTT	1	B	0	0	0	0	0
1005	733	an	AN8291.1	65.m07469	AO070190000007	1	-327	-292					ATGCCCTCGTTATCCAACGAATTGGCGTATACGTAA	ATGCCCTCGTTATCCAACGAATTGGCGTATACGTAA			MPSLSNELAYT*	MPSLSNELAYT*			CTGTCGACCT	AGAATTTCGC	0	U	0	0	0	0	0
1007	733	an	AN8291.1	65.m07469	AO070190000007	1	-207	-193					ATGGGGTACAATTAA	ATGGGGTACAATTAA			MGYN*	MGYN*			CATTCCACGC	CAAAGCCTCC	0	U	0	0	0	0	0
1008	737	af	AN4615.1	57.m05532	AO070267000032	1			-158	-126			ATGTTCGAAATCTTCTTCACGACTCTGTTCTGA		ATGTTCGAAATCTTCTTCACGACTCTGTTCTGA		MFEIFFTTLF*		MFEIFFTTLF*		TCTGCGGCAC	CCGTCTAAAT	0		0	0	0	0	0
1009	737	af	AN4615.1	57.m05532	AO070267000032	1			-96	-82			ATGCTAGTTTCTTAG		ATGCTAGTTTCTTAG		MLVS*		MLVS*		TGGGCCTTTG	CTTTACCAAG	0		0	0	0	0	0
1010	737	ao	AN4615.1	57.m05532	AO070267000032	1					-231	-79	ATGGGTCGCCGGGACTGCCGGAATTTCGCTTTAATACCTAAAGCCCTAGCTGTGTTCTCCCACTTTCATCGTCTTCGACTCCTCTTCCTTCCTTTTCGCCTTCAACTCTTCCCATTGTATACCCAAACTGGCCAGTTGAACATTTGGGATTGA			ATGGGTCGCCGGGACTGCCGGAATTTCGCTTTAATACCTAAAGCCCTAGCTGTGTTCTCCCACTTTCATCGTCTTCGACTCCTCTTCCTTCCTTTTCGCCTTCAACTCTTCCCATTGTATACCCAAACTGGCCAGTTGAACATTTGGGATTGA	MGRRDCRNFALIPKALAVFSHFHRLRLLFLPFRLQLFPLYTQTGQLNIWD*			MGRRDCRNFALIPKALAVFSHFHRLRLLFLPFRLQLFPLYTQTGQLNIWD*	CCCCGTGAAC	ACCATATTGA	0		0	0	0	0	0
1011	739	an	AN8881.1	56.m02292	AO070293000011	1	-244	-227					ATGCTTTCTAGTTTCTGA	ATGCTTTCTAGTTTCTGA			MLSSF*	MLSSF*			CTTGCAAGCG	GCTCTTCAGG	0	C	0	0	0	0	0
1012	739	an	AN8881.1	56.m02292	AO070293000011	1	-123	-109					ATGCTTTCCCGATAA	ATGCTTTCCCGATAA			MLSR*	MLSR*			CCTTTCTACG	AATCTACCAA	0	C	0	0	0	0	0
1013	739	af	AN8881.1	56.m02292	AO070293000011	1			-450	-433			ATGTGCATTGGCCTTTGA		ATGTGCATTGGCCTTTGA		MCIGL*		MCIGL*		TGAATCAATC	GGCCTAATCC	0	C	0	0	0	0	0
1014	739	af	AN8881.1	56.m02292	AO070293000011	1			-410	-399			ATGCACACTTAG		ATGCACACTTAG		MHT*		MHT*		CTCATAAGCG	TTGCTTCACC	0	C	0	0	0	0	0
1015	739	af	AN8881.1	56.m02292	AO070293000011	1			-292	-278			ATGCTTCACCAATAA		ATGCTTCACCAATAA		MLHQ*		MLHQ*		GACTTATACA	GTCTTACACT	0	C	0	0	0	0	0
1016	739	ao	AN8881.1	56.m02292	AO070293000011	1					-250	-236	ATGCTCACTTGCTGA			ATGCTCACTTGCTGA	MLTC*			MLTC*	TCTGCAGGCG	TTTTATCGCG	0	C	0	0	0	0	0
1017	739	ao	AN8881.1	56.m02292	AO070293000011	1					-99	-85	ATGTCCTGCCGATAG			ATGTCCTGCCGATAG	MSCR*			MSCR*	GAACCATACA	GGTTTCGTCT	0	C	0	0	0	0	0
1051	757	conserved	AN1854.1	58.m08938	AO070292000029	0	-57	-4	-51	-4	-51	-4	ATGsTkywThyvmsvArrrhdrkhhymmkwmmhhvhCwvvmmACkwvrACGTGA	ATGGTGTTTTCCAGAAAGGTTGGATCAAGAACAACTCAACACACGACGACGTGA	ATGGTTCATATACGGAGAGCGAGTACCATACATCGACTGGCCACTTGA	ATGCTTCTTCCGCCCAAAAAAATCCTACTTCACTACCTCACAACTTAA	MvfsrkvgsrttqhTtt*	MVFSRKVGSRTTQHTTT*	MVHIRRASTIHRLAT*	MLLPPKKILLHYLTT*	yvvbGwGrCm	CsrATGACvm	1		0	0	0	0	0
1057	759	ao	AN1712.1	58.m07778	AO070305000028	0					-56	-45	ATGTTGCTATAG			ATGTTGCTATAG	MLL*			MLL*	TCTACTCCGT	ATTCAACATA	1		0	0	0	0	0
1058	760	an	AN8234.1	53.m03735	AO070310000074	1	-234	-175					ATGCGACCTGATTCAGCTCTGCGGTTAGACCCTTCAGCTGACTTGGGATCTGGTATATAG	ATGCGACCTGATTCAGCTCTGCGGTTAGACCCTTCAGCTGACTTGGGATCTGGTATATAG			MRPDSALRLDPSADLGSGI*	MRPDSALRLDPSADLGSGI*			AGGAGGGTGA	GTACAAACAG	0		0	0	0	0	0
1059	760	ao	AN8234.1	53.m03735	AO070310000074	1					-157	-131	ATGATCTTTGCGATCTCAGCTGACTAG			ATGATCTTTGCGATCTCAGCTGACTAG	MIFAISAD*			MIFAISAD*	CCTCAGTTTC	GTTTTCCTTG	0		0	0	0	0	0
1063	762	an	AN4036.1	54.m06576	AO070328000140	0	-57	-25					ATGCATTTCTTCTTTGCAGGCCGAGGCTATTGA	ATGCATTTCTTCTTTGCAGGCCGAGGCTATTGA			MHFFFAGRGY*	MHFFFAGRGY*			GCCCCTATCT	TTTACGTGCA	1	T	0	0	0	0	0
1066	762	af	AN4036.1	54.m06576	AO070328000140	0			-55	-32			ATGAGATTTTGTGTCTTCTATTAA		ATGAGATTTTGTGTCTTCTATTAA		MRFCVFY*		MRFCVFY*		CTGTTAAGAG	GGAGCGAGCT	1	T	0	0	0	0	0
1070	763	an	AN4707.1	71.m15695	AO070329000169	1	-259	-182					ATGAGTAGCGTCCGTCATGAGCATTACCTAAGAAATGCCTCAAATTCGTTTGATGCTGGCGGTGTCTATAGAGCTTGA	ATGAGTAGCGTCCGTCATGAGCATTACCTAAGAAATGCCTCAAATTCGTTTGATGCTGGCGGTGTCTATAGAGCTTGA			MSSVRHEHYLRNASNSFDAGGVYRA*	MSSVRHEHYLRNASNSFDAGGVYRA*			AGCCAATCCG	AGTGCTGTTT	0	A	0	0	0	0	0
1071	763	an	AN4707.1	71.m15695	AO070329000169	1	-243	-229					ATGAGCATTACCTAA	ATGAGCATTACCTAA			MSIT*	MSIT*			AGCGTCCGTC	GAAATGCCTC	0	A	0	0	0	0	0
1072	763	ao	AN4707.1	71.m15695	AO070329000169	1					-232	-218	ATGAACTTGCAGTAA			ATGAACTTGCAGTAA	MNLQ*			MNLQ*	CCTACAAATA	GTTTATTCAC	0	A	0	0	0	0	0
1073	763	ao	AN4707.1	71.m15695	AO070329000169	1					-78	-25	ATGAGGGCATATTTCTTCCACCCCCATCTCTTGTCCCCTCCAGATTTGCATTGA			ATGAGGGCATATTTCTTCCACCCCCATCTCTTGTCCCCTCCAGATTTGCATTGA	MRAYFFHPHLLSPPDLH*			MRAYFFHPHLLSPPDLH*	TTGCCATGAC	GATCGACTCG	0	A	0	0	0	0	0
1101	786	af	AN1358.1	70.m15731	AO070237000002	1			-541	-494			ATGCGTGACTTGTGGCCCGAGAAAAAAAATTTCTCTCACCATCTTTGA		ATGCGTGACTTGTGGCCCGAGAAAAAAAATTTCTCTCACCATCTTTGA		MRDLWPEKKNFSHHL*		MRDLWPEKKNFSHHL*		ACTTTTGTGG	TATTCTCAAG	0	T	0	0	0	0	0
1102	786	ao	AN1358.1	70.m15731	AO070237000002	1					-58	-20	ATGTGCATTTCTGGCCTACAGTCTTCCCAGAACCTCTAA			ATGTGCATTTCTGGCCTACAGTCTTCCCAGAACCTCTAA	MCISGLQSSQNL*			MCISGLQSSQNL*	TGAGTTGTGC	ATCGTGATCA	1	T	0	0	0	0	0
1107	789	an	AN4501.1	57.m05629	AO070311000054	0	-57	-31					ATGTGCATACTTGGTGACAGCCGCTAA	ATGTGCATACTTGGTGACAGCCGCTAA			MCILGDSR*	MCILGDSR*			TTGCCAACGA	CTTTCGTCTA	1	O	0	0	0	0	0
1144	803	ao	AN5959.1	72.m19175	AO070340000312	1					-82	-71	ATGTTGTGTTAA			ATGTTGTGTTAA	MLC*			MLC*	CAACGATTTG	TTGCTCTGGC	0	E	0	0	NCU00468.1	0	0
1154	806	af	AN8276.1	53.m03684	AO070310000024	0			-46	-26			ATGTCTTTCGTACTGCGCTGA		ATGTCTTTCGTACTGCGCTGA		MSFVLR*		MSFVLR*		TGGTAATTGT	GATCCCTGAA	1	AK	0	0	0	0	0
1155	813	an	AN5660.1	58.m07314	AO070342000252	1	-271	-245					ATGGGCATCGACTCCAAGGGATACTGA	ATGGGCATCGACTCCAAGGGATACTGA			MGIDSKGY*	MGIDSKGY*			GCGACCGTTA	AACACACTAA	0	GO	0	0	0	0	0
1156	813	af	AN5660.1	58.m07314	AO070342000252	1			-643	-575			ATGTTCGAAGGTTTCGACTCCAGTAACCACCCTTATTGCATTCTTTGTCAACGTCCTTGTCGTTTCTAG		ATGTTCGAAGGTTTCGACTCCAGTAACCACCCTTATTGCATTCTTTGTCAACGTCCTTGTCGTTTCTAG		MFEGFDSSNHPYCILCQRPCRF*		MFEGFDSSNHPYCILCQRPCRF*		TTTCTACTGT	ATTTCATCTT	0	GO	0	0	0	0	0
1164	820	an	AN2318.1	71.m15516	AO070323000040	1	-222	-205					ATGATATTTCGCTTCTGA	ATGATATTTCGCTTCTGA			MIFRF*	MIFRF*			GTTTTCGCCA	AACTGAGCCC	0		0	0	0	0	0
1165	820	an	AN2318.1	71.m15516	AO070323000040	1	-103	-74					ATGATCGGGCGCTGCGGCCAATTTGCTTAA	ATGATCGGGCGCTGCGGCCAATTTGCTTAA			MIGRCGQFA*	MIGRCGQFA*			AGGATACAAC	GAGGTTGACC	0		0	0	0	0	0
1166	820	af	AN2318.1	71.m15516	AO070323000040	1			-401	-372			ATGAGAACCGAGTTTGGTTACTTCGCTTGA		ATGAGAACCGAGTTTGGTTACTTCGCTTGA		MRTEFGYFA*		MRTEFGYFA*		AGACACCACC	TAACGCATCT	0		0	0	0	0	0
1167	820	ao	AN2318.1	71.m15516	AO070323000040	1					-161	-141	ATGAGAGAGTCTGCCGACTAA			ATGAGAGAGTCTGCCGACTAA	MRESAD*			MRESAD*	AAGCAGCAAC	ATTATTGGCC	0		0	0	0	0	0
1168	823	an	AN0448.1	54.m06640	AO070338000312	0	-48	-16					ATGGAACGGACAGGGCGACGGTCACTTAACTGA	ATGGAACGGACAGGGCGACGGTCACTTAACTGA			MERTGRRSLN*	MERTGRRSLN*			ACTAGCAGTC	CAATACTCAA	1		0	0	0	0	0
1169	823	af	AN0448.1	54.m06640	AO070338000312	0			-57	-40			ATGCTTGACGAAGTTTGA		ATGCTTGACGAAGTTTGA		MLDEV*		MLDEV*		GCTACAAACC	TCGCAGCTCA	1		0	0	0	0	0
1182	825	an	AN5890.1	72.m19240	AO070245000018	0	-55	-44					ATGTGTCTATGA	ATGTGTCTATGA			MCL*	MCL*			ACCTCCCCTC	CTTTACCCCT	1	E	0	0	0	0	0
1199	847	an	AN4488.1	57.m05643	AO070311000040	0	-35	-3					ATGCCTTTGTTTCATTCAATGTGCCTTGATTGA	ATGCCTTTGTTTCATTCAATGTGCCTTGATTGA			MPLFHSMCLD*	MPLFHSMCLD*			GATCTCGGAT	ATATGGTGGA	1		0	0	0	0	0
1200	847	an	AN4488.1	57.m05643	AO070311000040	0	-17	-3					ATGTGCCTTGATTGA	ATGTGCCTTGATTGA			MCLD*	MCLD*			GTTTCATTCA	ATATGGTGGA	1		0	0	0	0	0
1202	847	af	AN4488.1	57.m05643	AO070311000040	0			-46	-23			ATGGTCTTATTCTACCAGACGTAG		ATGGTCTTATTCTACCAGACGTAG		MVLFYQT*		MVLFYQT*		GGCTACAGAA	ATGTCTCCAT	1		0	0	0	0	0
1215	867	af	AN5191.1	69.m15628	AO070237000021	0			-25	-5			ATGTTGCTTCCTTGTCAATGA		ATGTTGCTTCCTTGTCAATGA		MLLPCQ*		MLLPCQ*		ACTGACATTT	CCTCATGAAC	1	S	0	0	0	0	0
1222	875	an	AN8129.1	53.m03824	AO070266000018	1	-84	-64					ATGTTTTTCCTCTTCTGTTAA	ATGTTTTTCCTCTTCTGTTAA			MFFLFC*	MFFLFC*			TCTCATCAAG	TCGTCTCTTG	0		0	0	0	0	0
1223	875	af	AN8129.1	53.m03824	AO070266000018	1			-239	-225			ATGGTGTATCACTAA		ATGGTGTATCACTAA		MVYH*		MVYH*		GTACTTTTGA	GTTTGCCGTA	0		0	0	0	0	0
1224	875	af	AN8129.1	53.m03824	AO070266000018	1			-158	-129			ATGATTATTACCGGTCAAATCAATCGTTAA		ATGATTATTACCGGTCAAATCAATCGTTAA		MIITGQINR*		MIITGQINR*		TTCTCTAGCT	TTGTGCCCCA	0		0	0	0	0	0
1225	875	ao	AN8129.1	53.m03824	AO070266000018	1					-137	-111	ATGTTCTTCCCCTCAATGAGGTGTTAA			ATGTTCTTCCCCTCAATGAGGTGTTAA	MFFPSMRC*			MFFPSMRC*	CTCTCCCCCA	TTCTTATTCC	0		0	0	0	0	0
1226	875	ao	AN8129.1	53.m03824	AO070266000018	1					-122	-111	ATGAGGTGTTAA			ATGAGGTGTTAA	MRC*			MRC*	CTTCCCCTCA	TTCTTATTCC	0		0	0	0	0	0
1265	899	af	AN6913.1	71.m15219	AO070219000018	0			-32	-3			ATGCTGTCGTCGTTCTTTTCTTCTGGTTAG		ATGCTGTCGTCGTTCTTTTCTTCTGGTTAG		MLSSFFSSG*		MLSSFFSSG*		AAAAGCCTCT	CCATGAATGC	1	O	0	0	0	0	0
1285	910	an	AN7658.1	57.m05422	AO070268000027	1	-34	-5					ATGTGCCAAAGTCACTGGTACAGTTGTTAG	ATGTGCCAAAGTCACTGGTACAGTTGTTAG			MCQSHWYSC*	MCQSHWYSC*			CGCAGGTCGC	AACAATGGCA	1	Z	0	0	0	0	0
1286	910	af	AN7658.1	57.m05422	AO070268000027	1			-639	-604			ATGCCCGCACCAACAACGGAGTTTAACATGAGATGA		ATGCCCGCACCAACAACGGAGTTTAACATGAGATGA		MPAPTTEFNMR*		MPAPTTEFNMR*		CGCTTCCGCA	CAATACCCTT	0	Z	0	0	0	0	0
1287	910	af	AN7658.1	57.m05422	AO070268000027	1			-607	-551			ATGACAATACCCTTTTGGTCGTGTCTTATCAGACATTTCCTATTTTTATTAACTTAG		ATGACAATACCCTTTTGGTCGTGTCTTATCAGACATTTCCTATTTTTATTAACTTAG		MTIPFWSCLIRHFLFLLT*		MTIPFWSCLIRHFLFLLT*		TTAACATGAG	CGACTTGTGA	0	Z	0	0	0	0	0
1288	910	af	AN7658.1	57.m05422	AO070268000027	1			-397	-368			ATGCGCCGAGCTACACCAGAGGCCCTCTAA		ATGCGCCGAGCTACACCAGAGGCCCTCTAA		MRRATPEAL*		MRRATPEAL*		ACTGTGTCTT	AAGATGGCAA	0	Z	0	0	0	0	0
1289	910	ao	AN7658.1	57.m05422	AO070268000027	1					-249	-94	ATGCCCCCTTCAGGTAGCCTGATAGATTGTCAGGTACAGATCCGCTTAGCGGTTGGTCACTCCTTTATATCCAGAGCGAAATCACGACGAATCATTCGTGTCGCACAAGAAAAGACAGCACGTGGAGGTACGTGGCTAAGCCAGTCCCAATCATAG			ATGCCCCCTTCAGGTAGCCTGATAGATTGTCAGGTACAGATCCGCTTAGCGGTTGGTCACTCCTTTATATCCAGAGCGAAATCACGACGAATCATTCGTGTCGCACAAGAAAAGACAGCACGTGGAGGTACGTGGCTAAGCCAGTCCCAATCATAG	MPPSGSLIDCQVQIRLAVGHSFISRAKSRRIIRVAQEKTARGGTWLSQSQS*			MPPSGSLIDCQVQIRLAVGHSFISRAKSRRIIRVAQEKTARGGTWLSQSQS*	CCGCTTCCGC	CTGCCTAAGT	0	Z	0	0	0	0	0
1296	916	an	AN1524.1	55.m03268	AO070334000242	0	-59	-45					ATGAAACGGCATTAA	ATGAAACGGCATTAA			MKRH*	MKRH*			TCCATCACCC	CTCATTCTCA	1	H	FG00417.1	0	0	0	0
1303	917	conserved	AN4670.1	71.m15658	AO070284000036	1	-171	-160	-308	-297	-158	-147	ATGArbCyhTrA	ATGAGGCTCTGA	ATGAGTCCATAA	ATGAACCCTTGA	Mrl*	MRL*	MSP*	MNP*	bhmksArGCC	wyTsssvrsd	0	R	0	0	0	0	0
1304	917	an	AN4670.1	71.m15658	AO070284000036	1	-254	-222					ATGTCAACCGTCTCTTTATTTTTCTTCTCCTGA	ATGTCAACCGTCTCTTTATTTTTCTTCTCCTGA			MSTVSLFFFS*	MSTVSLFFFS*			TTGAACTCTT	CAGCAGATCT	0	R	0	0	0	0	0
1305	917	af	AN4670.1	71.m15658	AO070284000036	1			-418	-380			ATGTGGTGCATGAATCGAAAAGCCTTGTTTCGACTTTAG		ATGTGGTGCATGAATCGAAAAGCCTTGTTTCGACTTTAG		MWCMNRKALFRL*		MWCMNRKALFRL*		TCCTGGCTTC	GGGTTCTACT	0	R	0	0	0	0	0
1306	917	af	AN4670.1	71.m15658	AO070284000036	1			-409	-380			ATGAATCGAAAAGCCTTGTTTCGACTTTAG		ATGAATCGAAAAGCCTTGTTTCGACTTTAG		MNRKALFRL*		MNRKALFRL*		CATGTGGTGC	GGGTTCTACT	0	R	0	0	0	0	0
1307	917	ao	AN4670.1	71.m15658	AO070284000036	1					-123	-112	ATGGGCCATTGA			ATGGGCCATTGA	MGH*			MGH*	CCACCGAGAG	GAAAGAGCTC	0	R	0	0	0	0	0
1314	918	af	AN7240.1	72.m19809	AO070290000007	0			-60	-40			ATGCGGTGGATCTTCCAGTGA		ATGCGGTGGATCTTCCAGTGA		MRWIFQ*		MRWIFQ*		TACATATATA	GAAAGAAGCA	1	G	0	0	0	0	0
1354	935	af	AN0657.1	70.m15789	AO070343000569	1			-110	-99			ATGCTAGTCTGA		ATGCTAGTCTGA		MLV*		MLV*		GGTATCTTTT	CGTGAGATAC	0	U	0	0	0	0	0
1355	936	conserved	AN1082.1	70.m15156	AO070285000082	1	-243	-217	-285	-259	-116	-90	ATGrTyyyhvykyvyTTyrryysyTAA	ATGATTCTAGCGTCCTTCAATTCCTAA	ATGGTCCTCACTCGTTTTAGTCGCTAA	ATGGTTTCTCTTCATTTCGACCGTTAA	MilasFns*	MILASFNS*	MVLTRFSR*	MVSLHFDR*	ysvwGvmyCk	hhwvTCTyTC	0	F	FG05143.1	MG08146.1	0	0	0
1356	936	af	AN1082.1	70.m15156	AO070285000082	1			-293	-255			ATGAATCGATGGTCCTCACTCGTTTTAGTCGCTAATTAG		ATGAATCGATGGTCCTCACTCGTTTTAGTCGCTAATTAG		MNRWSSLVLVAN*		MNRWSSLVLVAN*		GAGGCTTCTG	TCTCTCATTT	0	F	FG05143.1	MG08146.1	0	0	0
1357	939	an	AN8655.1	55.m03152	AO070296000035	1	-253	-206					ATGCGTGCGAAGTTCTTGCTAGTGGTAGTGCCGGTGTTGTCATGTTGA	ATGCGTGCGAAGTTCTTGCTAGTGGTAGTGCCGGTGTTGTCATGTTGA			MRAKFLLVVVPVLSC*	MRAKFLLVVVPVLSC*			TGGAAGGCCA	TGTTTCCCTC	0		0	0	0	0	0
1358	939	an	AN8655.1	55.m03152	AO070296000035	1	-212	-141					ATGTTGATGTTTCCCTCCCCTCTTCTCCTTCCCTTCCTCATCGCCCTCTCTTATTGCACCAGCGCGTTCTAG	ATGTTGATGTTTCCCTCCCCTCTTCTCCTTCCCTTCCTCATCGCCCTCTCTTATTGCACCAGCGCGTTCTAG			MLMFPSPLLLPFLIALSYCTSAF*	MLMFPSPLLLPFLIALSYCTSAF*			CGGTGTTGTC	CGCCTCAAGC	0		0	0	0	0	0
1359	939	an	AN8655.1	55.m03152	AO070296000035	1	-206	-141					ATGTTTCCCTCCCCTCTTCTCCTTCCCTTCCTCATCGCCCTCTCTTATTGCACCAGCGCGTTCTAG	ATGTTTCCCTCCCCTCTTCTCCTTCCCTTCCTCATCGCCCTCTCTTATTGCACCAGCGCGTTCTAG			MFPSPLLLPFLIALSYCTSAF*	MFPSPLLLPFLIALSYCTSAF*			TGTCATGTTG	CGCCTCAAGC	0		0	0	0	0	0
1360	939	af	AN8655.1	55.m03152	AO070296000035	1			-475	-365			ATGGTTGATCTCGCTCCTCAGCGAGATTTGAACGTCATCATCATCGTCATATTCTTCTATTGCTCTTTGGTGCATATAGTTTACGAGCTCGTCTTGACATATTCAAGCTGA		ATGGTTGATCTCGCTCCTCAGCGAGATTTGAACGTCATCATCATCGTCATATTCTTCTATTGCTCTTTGGTGCATATAGTTTACGAGCTCGTCTTGACATATTCAAGCTGA		MVDLAPQRDLNVIIIVIFFYCSLVHIVYELVLTYSS*		MVDLAPQRDLNVIIIVIFFYCSLVHIVYELVLTYSS*		CCCTACTTGG	TTCGGTATAA	0		0	0	0	0	0
1361	939	ao	AN8655.1	55.m03152	AO070296000035	1					-264	-205	ATGGCAAAAGTATTCGGGATCTCATCGGGAATTCTCCTACCTTCCTTTGCATTGGAATGA			ATGGCAAAAGTATTCGGGATCTCATCGGGAATTCTCCTACCTTCCTTTGCATTGGAATGA	MAKVFGISSGILLPSFALE*			MAKVFGISSGILLPSFALE*	CTTCAACTCC	AGATTTTATT	0		0	0	0	0	0
1362	939	ao	AN8655.1	55.m03152	AO070296000035	1					-208	-44	ATGAAGATTTTATTTTTATTATCATTTTCTTACATTATTTTTTCTTTTTCCTTCTTCCCCCCCCTCCGTCCTTCCCTGCTACACGCTGGATTCACCATGACTGGCCGTTGCGGGGGTATTTATCATAACCCCTTACATCACCGCAGAGCTATATCCTTTGATTAA			ATGAAGATTTTATTTTTATTATCATTTTCTTACATTATTTTTTCTTTTTCCTTCTTCCCCCCCCTCCGTCCTTCCCTGCTACACGCTGGATTCACCATGACTGGCCGTTGCGGGGGTATTTATCATAACCCCTTACATCACCGCAGAGCTATATCCTTTGATTAA	MKILFLLSFSYIIFSFSFFPPLRPSLLHAGFTMTGRCGGIYHNPLHHRRAISFD*			MKILFLLSFSYIIFSFSFFPPLRPSLLHAGFTMTGRCGGIYHNPLHHRRAISFD*	TTGCATTGGA	CTTTCTCTAT	0		0	0	0	0	0
1363	939	ao	AN8655.1	55.m03152	AO070296000035	1					-112	-44	ATGACTGGCCGTTGCGGGGGTATTTATCATAACCCCTTACATCACCGCAGAGCTATATCCTTTGATTAA			ATGACTGGCCGTTGCGGGGGTATTTATCATAACCCCTTACATCACCGCAGAGCTATATCCTTTGATTAA	MTGRCGGIYHNPLHHRRAISFD*			MTGRCGGIYHNPLHHRRAISFD*	TGGATTCACC	CTTTCTCTAT	0		0	0	0	0	0
1372	952	an	AN1604.1	55.m03110	AO070339000257	0	-38	-18					ATGATTATCAGTCCAATCTGA	ATGATTATCAGTCCAATCTGA			MIISPI*	MIISPI*			TTTCTCCGAC	AGCGAACCTG	1		0	0	0	0	0
1387	958	ao	AN1634.1	58.m09021	AO070299000045	0					-57	-40	ATGGTCATCCATTGGTGA			ATGGTCATCCATTGGTGA	MVIHW*			MVIHW*	AAGCCGCGGC	TTCCGAAACA	1	A	0	0	0	0	0
1390	960	an	AN5694.1	65.m07419	AO070309000110	0	-54	-43					ATGCTTCCGTGA	ATGCTTCCGTGA			MLP*	MLP*			ATTCATATCT	TCCTTCTGGT	1	L	0	0	0	0	0
1406	965	an	AN8604.1	66.m04790	AO070340000151	0	-56	-33					ATGTATAAACGTCCCGGACCGTGA	ATGTATAAACGTCCCGGACCGTGA			MYKRPGP*	MYKRPGP*			CCATCCAGCA	AAATGTGTCC	1	J	0	0	0	YIR042C	0
1430	982	an	AN1564.1	55.m03090	AO070339000288	0	-50	-6					ATGCGTATATGTCTCATACATGACGAGCCAATTTTACCCTCGTGA	ATGCGTATATGTCTCATACATGACGAGCCAATTTTACCCTCGTGA			MRICLIHDEPILPS*	MRICLIHDEPILPS*			TGCAGTTAAT	CGGAAATGCC	1	L	0	0	0	0	0
1431	982	an	AN1564.1	55.m03090	AO070339000288	0	-42	-28					ATGTCTCATACATGA	ATGTCTCATACATGA			MSHT*	MSHT*			ATATGCGTAT	CGAGCCAATT	1	L	0	0	0	0	0
1432	982	af	AN1564.1	55.m03090	AO070339000288	0			-58	-29			ATGAAAGGGATCAATACATCTAGAGGATGA		ATGAAAGGGATCAATACATCTAGAGGATGA		MKGINTSRG*		MKGINTSRG*		ATCAATAAAA	TCCGAGAATC	1	L	0	0	0	0	0
1433	982	af	AN1564.1	55.m03090	AO070339000288	0			-32	-3			ATGATCCGAGAATCCCGTCATCGCCGTTGA		ATGATCCGAGAATCCCGTCATCGCCGTTGA		MIRESRHRR*		MIRESRHRR*		CATCTAGAGG	GGATGCCGAT	1	L	0	0	0	0	0
1434	982	ao	AN1564.1	55.m03090	AO070339000288	0					-35	-3	ATGGTCTCTCGTTTGCATAAGTACAATCTCTAA			ATGGTCTCTCGTTTGCATAAGTACAATCTCTAA	MVSRLHKYNL*			MVSRLHKYNL*	TATAGGAGCA	AGATGCCGAT	1	L	0	0	0	0	0
1460	997	af	AN7258.1	72.m19792	AO070297000014	1			-453	-421			ATGCACATAACTCTCCGGAGCTGCTGCAAGTAA		ATGCACATAACTCTCCGGAGCTGCTGCAAGTAA		MHITLRSCCK*		MHITLRSCCK*		GATCAATTGC	GACATTTTGG	0	R	0	0	0	0	0
1461	997	ao	AN7258.1	72.m19792	AO070297000014	1					-526	-512	ATGACCTGCATATAG			ATGACCTGCATATAG	MTCI*			MTCI*	TTTTCGATAC	GAAGAAACCC	0	R	0	0	0	0	0
1471	1011	af	AN0990.1	70.m15631	AO070318000147	0			-40	-11			ATGAGATTGAGCCCTCAGCTCATACTCTAG		ATGAGATTGAGCCCTCAGCTCATACTCTAG		MRLSPQLIL*		MRLSPQLIL*		TTCCAATGCT	GCCTTACTCC	1	A	0	0	0	0	0
1474	1011	ao	AN0990.1	70.m15631	AO070318000147	0					-39	-13	ATGAATTGTCTTAACAAAACTTGCTAA			ATGAATTGTCTTAACAAAACTTGCTAA	MNCLNKTC*			MNCLNKTC*	CAAAAGATAG	ATACAGTGCA	1	A	0	0	0	0	0
1487	1023	af	AN4871.1	59.m08766	AO070338000089	1			-159	-145			ATGCCCTTTAAATAA		ATGCCCTTTAAATAA		MPFK*		MPFK*		TGGTAACGCC	TTTCTTCTCC	0	G	0	0	0	YDR371W	0
1510	1035	af	AN3747.1	65.m07387	AO070309000075	1			-151	-77			ATGCTTCTGCTATCATCTAGCCGTGGAGGGACCGCACAGAATCTGCTTCGCCTACCTGAACCTGTTTCGAGCTAA		ATGCTTCTGCTATCATCTAGCCGTGGAGGGACCGCACAGAATCTGCTTCGCCTACCTGAACCTGTTTCGAGCTAA		MLLLSSSRGGTAQNLLRLPEPVSS*		MLLLSSSRGGTAQNLLRLPEPVSS*		GGTGCTTTCA	TACGAACCTC	0	O	0	0	0	0	0
1528	1046	conserved	AN1494.1	55.m03004	AO070334000211	0	-60	-13	-60	-13	-60	-13	ATGACGGTrGAkGryCAGskwrGCGCTCGyGGCGCAGTrCACGAyTGA	ATGACGGTGGATGGTCAGCTTGGCGCTCGTGGCGCAGTACACGACTGA	ATGACGGTGGATGGTCAGCGTGGCGCTCGCGGCGCAGTGCACGATTGA	ATGACGGTAGAGGACCAGGGAAGCGCTCGCGGCGCAGTGCACGACTGA	MTVdgQlgARGAVHD*	MTVDGQLGARGAVHD*	MTVDGQRGARGAVHD*	MTVEDQGSARGAVHD*	krrsyTGGAC	GTAyyyTGCG	1	K	0	0	NCU02052.1	0	0
1532	1051	an	AN9467.1	53.m03848	AO070322000047	0	-26	-3					ATGTGGCTTTCTTACCAGTGGTGA	ATGTGGCTTTCTTACCAGTGGTGA			MWLSYQW*	MWLSYQW*			GTCCGAGTAC	CAATGAAGGG	1	T	0	0	0	0	0
1570	1064	an	AN5100.1	54.m06960	AO070291000079	1	-24	-7					ATGGAATGGGTCTTATGA	ATGGAATGGGTCTTATGA			MEWVL*	MEWVL*			ATATTTCTCT	GAAACTATGT	1	DKT	0	0	0	0	0
1585	1083	af	AN2143.1	72.m19698	AO070343000190	0			-57	-40			ATGCAGCTTACTGACTGA		ATGCAGCTTACTGACTGA		MQLTD*		MQLTD*		GGGTCAGCTT	TAATTTATTC	1	D	FG07139.1	MG07070.1	0	0	0
1586	1083	ao	AN2143.1	72.m19698	AO070343000190	0					-47	-33	ATGCATCTACGATGA			ATGCATCTACGATGA	MHLR*			MHLR*	ATGTGAACTA	CTATCTAGTG	1	D	FG07139.1	MG07070.1	0	0	0
1587	1083	ao	AN2143.1	72.m19698	AO070343000190	0					-36	-25	ATGACTATCTAG			ATGACTATCTAG	MTI*			MTI*	TGCATCTACG	TGTTCTAAAT	1	D	FG07139.1	MG07070.1	0	0	0
1619	1104	af	AN5328.1	52.m03790	AO070339000247	0			-54	-10			ATGAGAGGACACACAAGCGTCCCTTCCGAGTCTACAGTCCGATAG		ATGAGAGGACACACAAGCGTCCCTTCCGAGTCTACAGTCCGATAG		MRGHTSVPSESTVR*		MRGHTSVPSESTVR*		TTATGCCAGT	CAAAAGAAGA	1	Q	0	0	0	0	0
1638	1112	an	AN4268.1	65.m07446	AO070343000043	1	-211	-200					ATGAATCATTGA	ATGAATCATTGA			MNH*	MNH*			CAAAGGAAAG	TGCCTACGAG	0	R	0	0	NCU03949.1	0	0
1639	1112	an	AN4268.1	65.m07446	AO070343000043	1	-200	-165					ATGCCTACGAGTACGAGTGATGCAAATACTTATTAG	ATGCCTACGAGTACGAGTGATGCAAATACTTATTAG			MPTSTSDANTY*	MPTSTSDANTY*			TGAATCATTG	ACTGTTCAAC	0	R	0	0	NCU03949.1	0	0
1640	1112	an	AN4268.1	65.m07446	AO070343000043	1	-181	-116					ATGCAAATACTTATTAGACTGTTCAACGAGAAGACGCCCGAACATCTCCGCGCGTGGTTGATTTGA	ATGCAAATACTTATTAGACTGTTCAACGAGAAGACGCCCGAACATCTCCGCGCGTGGTTGATTTGA			MQILIRLFNEKTPEHLRAWLI*	MQILIRLFNEKTPEHLRAWLI*			AGTACGAGTG	CTCAAATGCC	0	R	0	0	NCU03949.1	0	0
1641	1112	an	AN4268.1	65.m07446	AO070343000043	1	-110	-81					ATGCCCCCGCGGCCGAATATTCCCGACTGA	ATGCCCCCGCGGCCGAATATTCCCGACTGA			MPPRPNIPD*	MPPRPNIPD*			TTTGACTCAA	CAATTATATA	0	R	0	0	NCU03949.1	0	0
1642	1112	an	AN4268.1	65.m07446	AO070343000043	1	-71	-42					ATGCTCATCCAATACTACTCGTGTAAATAA	ATGCTCATCCAATACTACTCGTGTAAATAA			MLIQYYSCK*	MLIQYYSCK*			ACAATTATAT	CCCCTCCACA	0	R	0	0	NCU03949.1	0	0
1643	1112	af	AN4268.1	65.m07446	AO070343000043	1			-125	-78			ATGTGGAACAACATCGGGATGGCGGGTGGAAGCGATCCGCAAGTTTAA		ATGTGGAACAACATCGGGATGGCGGGTGGAAGCGATCCGCAAGTTTAA		MWNNIGMAGGSDPQV*		MWNNIGMAGGSDPQV*		AGTCCAGAGG	TATAGTATCT	0	R	0	0	NCU03949.1	0	0
1644	1112	af	AN4268.1	65.m07446	AO070343000043	1			-107	-78			ATGGCGGGTGGAAGCGATCCGCAAGTTTAA		ATGGCGGGTGGAAGCGATCCGCAAGTTTAA		MAGGSDPQV*		MAGGSDPQV*		CAACATCGGG	TATAGTATCT	0	R	0	0	NCU03949.1	0	0
1652	1125	conserved	AN1546.1	55.m03274	AO070339000308	1	-185	-174	-657	-646	-177	-166	ATGkykyTGTGA	ATGTTTCTGTGA	ATGGCTTTGTGA	ATGTCGCTGTGA	MfL*	MFL*	MAL*	MSL*	yArymCAGTG	rATGAsydGG	0	B	0	0	0	0	0
1653	1125	an	AN1546.1	55.m03274	AO070339000308	1	-172	-152					ATGAGTGGGAAGAGAAACTGA	ATGAGTGGGAAGAGAAACTGA			MSGKRN*	MSGKRN*			TTTCTGTGAG	TCCGTGCGAA	0	B	0	0	0	0	0
1654	1125	af	AN1546.1	55.m03274	AO070339000308	1			-644	-621			ATGACCAGGAGCAAGATCACTTGA		ATGACCAGGAGCAAGATCACTTGA		MTRSKIT*		MTRSKIT*		GCTTTGTGAA	GAGTGCAAAA	0	B	0	0	0	0	0
1655	1125	ao	AN1546.1	55.m03274	AO070339000308	1					-164	-123	ATGACTTGGAGAAAGAGTACTCAACCGTGCGAAAAGGAATAA			ATGACTTGGAGAAAGAGTACTCAACCGTGCGAAAAGGAATAA	MTWRKSTQPCEKE*			MTWRKSTQPCEKE*	TCGCTGTGAA	CAGATCAAGA	0	B	0	0	0	0	0
1660	1127	af	AN0847.1	70.m15446	AO070216000006	0			-52	-32			ATGGTGCTCAGCTTTGTCTGA		ATGGTGCTCAGCTTTGTCTGA		MVLSFV*		MVLSFV*		CTCTTCCTCC	CCTCTATTAT	1	O	0	MG06648.1	NCU09485.1	0	0
1674	1133	af	AN3539.1	56.m02549	AO070331000053	1			-287	-270			ATGGTTAAAATGCCTTGA		ATGGTTAAAATGCCTTGA		MVKMP*		MVKMP*		GTTTGAAGCC	TCACCCTGGA	0		0	0	0	0	0
1675	1133	af	AN3539.1	56.m02549	AO070331000053	1			-221	-207			ATGAACCCTTACTAG		ATGAACCCTTACTAG		MNPY*		MNPY*		CCACCAATGC	TTTGTACTCG	0		0	0	0	0	0
1676	1133	ao	AN3539.1	56.m02549	AO070331000053	1					-256	-191	ATGGTATGTTCAGCTAGGCAAATGGCAAGGAAGCTTGGCGCATGTCCAAGTAATATTAAAACATAA			ATGGTATGTTCAGCTAGGCAAATGGCAAGGAAGCTTGGCGCATGTCCAAGTAATATTAAAACATAA	MVCSARQMARKLGACPSNIKT*			MVCSARQMARKLGACPSNIKT*	GCACTTGTCA	TAATATTGTA	0		0	0	0	0	0
1677	1133	ao	AN3539.1	56.m02549	AO070331000053	1					-251	-240	ATGTTCAGCTAG			ATGTTCAGCTAG	MFS*			MFS*	TGTCAATGGT	GCAAATGGCA	0		0	0	0	0	0
1678	1133	ao	AN3539.1	56.m02549	AO070331000053	1					-235	-191	ATGGCAAGGAAGCTTGGCGCATGTCCAAGTAATATTAAAACATAA			ATGGCAAGGAAGCTTGGCGCATGTCCAAGTAATATTAAAACATAA	MARKLGACPSNIKT*			MARKLGACPSNIKT*	AGCTAGGCAA	TAATATTGTA	0		0	0	0	0	0
1679	1133	ao	AN3539.1	56.m02549	AO070331000053	1					-215	-204	ATGTCCAAGTAA			ATGTCCAAGTAA	MSK*			MSK*	AGCTTGGCGC	TATTAAAACA	0		0	0	0	0	0
1691	1144	af	AN6528.1	62.m03116	AO070270000028	1			-399	-364			ATGCATCACATTTCAGCACCTACAGTCTCAGGATAA		ATGCATCACATTTCAGCACCTACAGTCTCAGGATAA		MHHISAPTVSG*		MHHISAPTVSG*		AGCTGGCCTG	TCATCAATCG	0	O	0	0	0	0	0
1697	1152	an	AN4517.1	57.m05611	AO070321000123	1	-518	-489					ATGCTCGTTGCATTCTATCCTCTTGGGTAG	ATGCTCGTTGCATTCTATCCTCTTGGGTAG			MLVAFYPLG*	MLVAFYPLG*			CTTCCTTCTC	TCTTTGCTTC	0	P	0	0	NCU00010.1	0	0
1698	1152	an	AN4517.1	57.m05611	AO070321000123	1	-68	-54					ATGGAAATACTTTAA	ATGGAAATACTTTAA			MEIL*	MEIL*			TCGTCGTGCC	TCGACGGTCT	0	P	0	0	NCU00010.1	0	0
1699	1152	af	AN4517.1	57.m05611	AO070321000123	1			-665	-642			ATGGCCCAATGCTTCACCATATAG		ATGGCCCAATGCTTCACCATATAG		MAQCFTI*		MAQCFTI*		TATTTCTTGT	TAGGGGTTTT	0	P	0	0	NCU00010.1	0	0
1700	1152	af	AN4517.1	57.m05611	AO070321000123	1			-657	-595			ATGCTTCACCATATAGTAGGGGTTTTTCCTTCATCCCTGTTCGTGTCCTCGTCCCACATATAG		ATGCTTCACCATATAGTAGGGGTTTTTCCTTCATCCCTGTTCGTGTCCTCGTCCCACATATAG		MLHHIVGVFPSSLFVSSSHI*		MLHHIVGVFPSSLFVSSSHI*		GTATGGCCCA	CTTTTTAATC	0	P	0	0	NCU00010.1	0	0
1701	1152	af	AN4517.1	57.m05611	AO070321000123	1			-251	-237			ATGGAAACATTTTGA		ATGGAAACATTTTGA		METF*		METF*		CAATTGTGTC	TGAACGTGTG	0	P	0	0	NCU00010.1	0	0
1702	1152	af	AN4517.1	57.m05611	AO070321000123	1			-237	-226			ATGAACGTGTGA		ATGAACGTGTGA		MNV*		MNV*		AAACATTTTG	TTGTGTCGGA	0	P	0	0	NCU00010.1	0	0
1703	1152	ao	AN4517.1	57.m05611	AO070321000123	1					-63	-34	ATGGAAATACCCTATGGTGGTTTGATCTGA			ATGGAAATACCCTATGGTGGTTTGATCTGA	MEIPYGGLI*			MEIPYGGLI*	TTGTCGTGTC	GCTTGTTGGA	0	P	0	0	NCU00010.1	0	0
1704	1152	ao	AN4517.1	57.m05611	AO070321000123	1					-50	-39	ATGGTGGTTTGA			ATGGTGGTTTGA	MVV*			MVV*	GAAATACCCT	TCTGAGCTTG	1	P	0	0	NCU00010.1	0	0
1715	1165	an	AN0414.1	54.m06661	AO070338000256	0	-41	-12					ATGAGACAAAGATTGTTTTGCATTTTCTAA	ATGAGACAAAGATTGTTTTGCATTTTCTAA			MRQRLFCIF*	MRQRLFCIF*			TTATTGATTG	AGAAGTATAC	1	Z	0	0	0	0	0
1718	1165	ao	AN0414.1	54.m06661	AO070338000256	0					-57	-19	ATGCCTTATATTGCACCATACTCACTTCAGATCGGTTAG			ATGCCTTATATTGCACCATACTCACTTCAGATCGGTTAG	MPYIAPYSLQIG*			MPYIAPYSLQIG*	ATAAGGTCTT	ACACTGTTCA	1	Z	0	0	0	0	0
1733	1173	an	AN9065.1	66.m04528	AO070332000209	0	-59	-9					ATGTGCCAGCCAGTACATCATACGATTCCCAACTCAGAGCCATACTTTTAA	ATGTGCCAGCCAGTACATCATACGATTCCCAACTCAGAGCCATACTTTTAA			MCQPVHHTIPNSEPYF*	MCQPVHHTIPNSEPYF*			GGCGAAATAA	CCAACGAAAT	1		0	0	0	0	0
1745	1176	af	AN2336.1	65.m07340	AO070343000082	0			-51	-28			ATGGCCAAACTGCTCAGCAAGTGA		ATGGCCAAACTGCTCAGCAAGTGA		MAKLLSK*		MAKLLSK*		AGTATAAAAG	CAATGGGTAA	1	M	0	0	0	0	0
1751	1177	ao	AN7587.1	72.m19609	AO070343000300	0					-14	-3	ATGGCGAGCTGA			ATGGCGAGCTGA	MAS*			MAS*	TGGAACGAGT	GAATGCAGGT	1	S	0	0	0	0	0
1752	1179	ao	AN8870.1	71.m16010	AO070271000001	1					-397	-386	ATGCTTAATTAG			ATGCTTAATTAG	MLN*			MLN*	TCATTGTCAT	AGATTCACGC	0	J	FG07480.1	0	NCU01452.1	0	0
1775	1186	ao	AN1722.1	58.m07789	AO070305000037	0					-51	-37	ATGAGGGTTCAATGA			ATGAGGGTTCAATGA	MRVQ*			MRVQ*	ACCTCGTTCT	CAGTTCAAAC	1	H	0	0	0	0	0
1776	1186	ao	AN1722.1	58.m07789	AO070305000037	0					-40	-14	ATGACAGTTCAAACAGATCCTTCTTAA			ATGACAGTTCAAACAGATCCTTCTTAA	MTVQTDPS*			MTVQTDPS*	TGAGGGTTCA	TGTCCTTCTC	1	H	0	0	0	0	0
1777	1189	an	AN0772.1	70.m15377	AO070316000067	0	-51	-25					ATGGCGTTATCACTACTTCAGCTCTAG	ATGGCGTTATCACTACTTCAGCTCTAG			MALSLLQL*	MALSLLQL*			AGCACTGAAA	ATCTGGTTTG	1	IQR	0	0	0	0	0
1782	1189	af	AN0772.1	70.m15377	AO070316000067	0			-57	-25			ATGTGCTACTGTTACCAAAATTTAGCACTCTGA		ATGTGCTACTGTTACCAAAATTTAGCACTCTGA		MCYCYQNLAL*		MCYCYQNLAL*		AATATGGCCC	GTTGAATCTG	1	IQR	0	0	0	0	0
1821	1215	an	AN6725.1	65.m07245	AO070339000169	0	-42	-28					ATGCGGCCACCCTGA	ATGCGGCCACCCTGA			MRPP*	MRPP*			TATTCATACT	ATCGACAGTA	1	A	0	MG07164.1	NCU06763.1	0	0
1827	1215	ao	AN6725.1	65.m07245	AO070339000169	0					-40	-29	ATGACCGCATAA			ATGACCGCATAA	MTA*			MTA*	TCACTGTGAC	TCGCGAGAGA	1	A	0	MG07164.1	NCU06763.1	0	0
1858	1224	an	AN8565.1	71.m15702	AO070311000007	0	-45	-31					ATGCGGCGGCCATGA	ATGCGGCGGCCATGA			MRRP*	MRRP*			TGCAAATGCA	TCCGTTCACA	1	E	0	0	0	0	0
1859	1224	an	AN8565.1	71.m15702	AO070311000007	0	-34	-2					ATGATCCGTTCACATCGCCCTCGTGCCTGCTGA	ATGATCCGTTCACATCGCCCTCGTGCCTGCTGA			MIRSHRPRAC*	MIRSHRPRAC*			TGCGGCGGCC	AATGAGTCCG	1	E	0	0	0	0	0
1866	1231	an	AN4162.1	58.m07363	AO070342000192	1	-41	-15					ATGAGTCGATATATATTTGCAAGTTAA	ATGAGTCGATATATATTTGCAAGTTAA			MSRYIFAS*	MSRYIFAS*			GGATCCCTTG	AGTTCGCTTC	1		0	0	0	0	0
1892	1240	an	AN4861.1	59.m09110	AO070329000146	1	-122	-105					ATGCTTCATGCACCTTGA	ATGCTTCATGCACCTTGA			MLHAP*	MLHAP*			TGAAACTCCC	TTCCAACATA	0	K	0	0	0	0	0
1905	1243	an	AN2884.1	59.m08731	AO070338000130	0	-25	-8					ATGGCCTGTCATATGTGA	ATGGCCTGTCATATGTGA			MACHM*	MACHM*			CCGGCCTTAC	CCTCACGATG	1		0	0	0	0	0
1907	1243	ao	AN2884.1	59.m08731	AO070338000130	0					-27	-16	ATGGCTCATTAG			ATGGCTCATTAG	MAH*			MAH*	ATGTATATGT	AGGTAAACGT	1		0	0	0	0	0
1947	1264	af	AN5588.1	58.m07509	AO070328000021	1			-246	-220			ATGGCAGTCATCCCGATCAAAGATTGA		ATGGCAGTCATCCCGATCAAAGATTGA		MAVIPIKD*		MAVIPIKD*		CTCGTTGGCG	GCTACCATCT	0	O	FG01475.1	0	0	0	0
1948	1264	ao	AN5588.1	58.m07509	AO070328000021	1					-113	-87	ATGGCATTTGCGTTCACTAAGAGATAA			ATGGCATTTGCGTTCACTAAGAGATAA	MAFAFTKR*			MAFAFTKR*	CTGATCAGTG	TCTCGTCTCA	0	O	FG01475.1	0	0	0	0
1958	1276	an	AN7470.1	57.m05874	AO070287000056	0	-60	-19					ATGATCTACCCATCAATTGACCTTTACATCCAGCTCAATTGA	ATGATCTACCCATCAATTGACCTTTACATCCAGCTCAATTGA			MIYPSIDLYIQLN*	MIYPSIDLYIQLN*			GCGTGAACGA	GATAGTCTTT	1		0	0	0	0	0
1963	1276	af	AN7470.1	57.m05874	AO070287000056	1			-159	-79			ATGCCAGCAGTATTTGCCAGTGAGGATGTCGAGTCGTTCAGCGAGTACACTGCTAATCTACAAAGGTCAAAAATACTATAA		ATGCCAGCAGTATTTGCCAGTGAGGATGTCGAGTCGTTCAGCGAGTACACTGCTAATCTACAAAGGTCAAAAATACTATAA		MPAVFASEDVESFSEYTANLQRSKIL*		MPAVFASEDVESFSEYTANLQRSKIL*		TATTATATAA	TTATCAGCAT	0		0	0	0	0	0
1964	1276	af	AN7470.1	57.m05874	AO070287000056	1			-134	-66			ATGTCGAGTCGTTCAGCGAGTACACTGCTAATCTACAAAGGTCAAAAATACTATAATTATCAGCATTGA		ATGTCGAGTCGTTCAGCGAGTACACTGCTAATCTACAAAGGTCAAAAATACTATAATTATCAGCATTGA		MSSRSASTLLIYKGQKYYNYQH*		MSSRSASTLLIYKGQKYYNYQH*		GCCAGTGAGG	GATTTCCCAA	0		0	0	0	0	0
1970	1279	an	AN0905.1	70.m15514	AO070320000080	0	-33	-22					ATGATGGCCTAG	ATGATGGCCTAG			MMA*	MMA*			CTCGTATTAT	AGCACTTTGG	1	DO	0	0	0	0	0
1982	1283	af	AN2447.1	69.m15212	AO070264000030	1			-37	-14			ATGCGATTAAGCGGGACCGCCTGA		ATGCGATTAAGCGGGACCGCCTGA		MRLSGTA*		MRLSGTA*		CTTGGCGCAG	TCGCCCGGCC	1		FG01481.1	MG03241.1	0	0	0
1983	1287	conserved	AN6642.1	62.m03239	AO070295000022	1	-101	-54	-86	-39	-139	-92	ATGGACTCkCAyTssyTkGwdGAyACrATmTAyATGrAGCCTCCyTAr	ATGGACTCGCATTCCTTGGTTGACACGATCTATATGGAGCCTCCCTAA	ATGGACTCTCACTCGCTTGAAGATACGATATACATGAAGCCTCCTTAG	ATGGACTCGCATTGCCTGGAGGATACAATCTATATGGAGCCTCCCTAA	MDSHsLvDTIYMePP*	MDSHSLVDTIYMEPP*	MDSHSLEDTIYMKPP*	MDSHCLEDTIYMEPP*	sTbbwkGTGy	rrdmmmbsmh	0	P	0	0	0	0	0
1984	1287	conserved	AN6642.1	62.m03239	AO070295000022	1	-68	-54	-53	-39	-106	-92	ATGrAGCCTCCyTAr	ATGGAGCCTCCCTAA	ATGAAGCCTCCTTAG	ATGGAGCCTCCCTAA	MePP*	MEPP*	MKPP*	MEPP*	yACrATmTAy	rrdmmmbsmh	0	P	0	0	0	0	0
1992	1294	an	AN5549.1	69.m14939	AO070341000115	1	-300	-226					ATGACAAAATGGACCAAATCCTGGATGAAATGGCAGAGATACCTTGCTCTCTCTTTACAGCGACGCTGGGCCTGA	ATGACAAAATGGACCAAATCCTGGATGAAATGGCAGAGATACCTTGCTCTCTCTTTACAGCGACGCTGGGCCTGA			MTKWTKSWMKWQRYLALSLQRRWA*	MTKWTKSWMKWQRYLALSLQRRWA*			GAGGAGTGGA	AAATTCCATC	0	P	0	0	0	0	0
1993	1294	an	AN5549.1	69.m14939	AO070341000115	1	-292	-176					ATGGACCAAATCCTGGATGAAATGGCAGAGATACCTTGCTCTCTCTTTACAGCGACGCTGGGCCTGAAAATTCCATCAGATTCCGCAGGATTGACAGGCCCCAGCAGCCCAATTTGA	ATGGACCAAATCCTGGATGAAATGGCAGAGATACCTTGCTCTCTCTTTACAGCGACGCTGGGCCTGAAAATTCCATCAGATTCCGCAGGATTGACAGGCCCCAGCAGCCCAATTTGA			MDQILDEMAEIPCSLFTATLGLKIPSDSAGLTGPSSPI*	MDQILDEMAEIPCSLFTATLGLKIPSDSAGLTGPSSPI*			GAATGACAAA	TCCTACCTAG	0	P	0	0	0	0	0
1994	1294	an	AN5549.1	69.m14939	AO070341000115	1	-276	-226					ATGAAATGGCAGAGATACCTTGCTCTCTCTTTACAGCGACGCTGGGCCTGA	ATGAAATGGCAGAGATACCTTGCTCTCTCTTTACAGCGACGCTGGGCCTGA			MKWQRYLALSLQRRWA*	MKWQRYLALSLQRRWA*			CAAATCCTGG	AAATTCCATC	0	P	0	0	0	0	0
1995	1294	an	AN5549.1	69.m14939	AO070341000115	1	-271	-176					ATGGCAGAGATACCTTGCTCTCTCTTTACAGCGACGCTGGGCCTGAAAATTCCATCAGATTCCGCAGGATTGACAGGCCCCAGCAGCCCAATTTGA	ATGGCAGAGATACCTTGCTCTCTCTTTACAGCGACGCTGGGCCTGAAAATTCCATCAGATTCCGCAGGATTGACAGGCCCCAGCAGCCCAATTTGA			MAEIPCSLFTATLGLKIPSDSAGLTGPSSPI*	MAEIPCSLFTATLGLKIPSDSAGLTGPSSPI*			CCTGGATGAA	TCCTACCTAG	0	P	0	0	0	0	0
1996	1295	an	AN4401.1	58.m07925	AO070261000045	1	-275	-255					ATGACGCCGCTGGGAATGTAG	ATGACGCCGCTGGGAATGTAG			MTPLGM*	MTPLGM*			TTGCCGGCCA	CTGTTATCTT	0	E	0	0	0	0	0
1997	1295	an	AN4401.1	58.m07925	AO070261000045	1	-238	-137					ATGAGTCAGTTCTGTCAGTGTCCCTCTTTCACCCAGATTTTTTTGGAGGCCGAAATCGCCCCTCGATTCCGCCCCGCCGACGGGACCGGGACCCTACCTTGA	ATGAGTCAGTTCTGTCAGTGTCCCTCTTTCACCCAGATTTTTTTGGAGGCCGAAATCGCCCCTCGATTCCGCCCCGCCGACGGGACCGGGACCCTACCTTGA			MSQFCQCPSFTQIFLEAEIAPRFRPADGTGTLP*	MSQFCQCPSFTQIFLEAEIAPRFRPADGTGTLP*			TCTTATCGAG	CATTTTAAAA	0	E	0	0	0	0	0
1998	1295	af	AN4401.1	58.m07925	AO070261000045	1			-240	-226			ATGAAATGTGGTTAG		ATGAAATGTGGTTAG		MKCG*		MKCG*		AAAAACTCCG	TGTAGGGACG	0	E	0	0	0	0	0
1999	1295	af	AN4401.1	58.m07925	AO070261000045	1			-235	-221			ATGTGGTTAGTGTAG		ATGTGGTTAGTGTAG		MWLV*		MWLV*		CTCCGATGAA	GGACGGCAGT	0	E	0	0	0	0	0
2000	1295	af	AN4401.1	58.m07925	AO070261000045	1			-191	-114			ATGAGTCAAAGATTTGTGGCCGAAATCGCCTCTCGGTCATTGTTCTGCCCCGCCAGTCTGGCTCCAGCTTTCCTTTAA		ATGAGTCAAAGATTTGTGGCCGAAATCGCCTCTCGGTCATTGTTCTGCCCCGCCAGTCTGGCTCCAGCTTTCCTTTAA		MSQRFVAEIASRSLFCPASLAPAFL*		MSQRFVAEIASRSLFCPASLAPAFL*		TATCGGGGGT	AATTTCCCTC	0	E	0	0	0	0	0
2015	1300	ao	AN3123.1	59.m08613	AO070303000024	0					-38	-9	ATGTCTGGAATCTTCCTGCAGCCTGAATAA			ATGTCTGGAATCTTCCTGCAGCCTGAATAA	MSGIFLQPE*			MSGIFLQPE*	CTTGTTACCG	ACTGCAACAT	1	PT	FG04030.1	0	NCU04512.1	0	0
2020	1301	ao	AN8251.1	53.m03716	AO070310000057	0					-59	-48	ATGACCCGCTGA			ATGACCCGCTGA	MTR*			MTR*	ACCCGGGGAC	CTTCTACCCA	1		0	0	0	0	0
2039	1311	af	AN8363.1	52.m04104	AO070274000030	1			-165	-61			ATGTTCCGCATAGGACAGGACGTTCACGCGATGTGGATCCCCTCGGCAGACGTCTTAGTCTGGTCTCCTGAAAATCTCCCTTCTGCTTTCACAAGCCACAGGTAA		ATGTTCCGCATAGGACAGGACGTTCACGCGATGTGGATCCCCTCGGCAGACGTCTTAGTCTGGTCTCCTGAAAATCTCCCTTCTGCTTTCACAAGCCACAGGTAA		MFRIGQDVHAMWIPSADVLVWSPENLPSAFTSHR*		MFRIGQDVHAMWIPSADVLVWSPENLPSAFTSHR*		ATCAACAAGG	CCAACAACTC	0	R	0	0	0	0	0
2040	1311	af	AN8363.1	52.m04104	AO070274000030	1			-135	-61			ATGTGGATCCCCTCGGCAGACGTCTTAGTCTGGTCTCCTGAAAATCTCCCTTCTGCTTTCACAAGCCACAGGTAA		ATGTGGATCCCCTCGGCAGACGTCTTAGTCTGGTCTCCTGAAAATCTCCCTTCTGCTTTCACAAGCCACAGGTAA		MWIPSADVLVWSPENLPSAFTSHR*		MWIPSADVLVWSPENLPSAFTSHR*		CGTTCACGCG	CCAACAACTC	0	R	0	0	0	0	0
2042	1311	ao	AN8363.1	52.m04104	AO070274000030	1					-146	-108	ATGAAAGAATATCCCGAGCGAAGCAGCCGTCACATGTAA			ATGAAAGAATATCCCGAGCGAAGCAGCCGTCACATGTAA	MKEYPERSSRHM*			MKEYPERSSRHM*	GGTGCCCTGT	TGTGAGAAAA	0	R	0	0	0	0	0
2043	1321	af	AN1451.1	55.m02953	AO070302000016	1			-225	-193			ATGAGACTTGTCTATCTTCGTCCAAATCTATAG		ATGAGACTTGTCTATCTTCGTCCAAATCTATAG		MRLVYLRPNL*		MRLVYLRPNL*		GGAGACATCT	CCACCGGGTT	0		FG00185.1	0	NCU00537.1	0	0
2044	1321	ao	AN1451.1	55.m02953	AO070302000016	1					-294	-232	ATGCACGGCTTGAGTCAGTGGACTTGTAATTTGATCCAGTTTTCGTTATTGTCTTCAGCTTGA			ATGCACGGCTTGAGTCAGTGGACTTGTAATTTGATCCAGTTTTCGTTATTGTCTTCAGCTTGA	MHGLSQWTCNLIQFSLLSSA*			MHGLSQWTCNLIQFSLLSSA*	TCGAATCTGT	CTTAATTGAG	0		FG00185.1	0	NCU00537.1	0	0
2055	1323	an	AN4495.1	57.m05636	AO070311000047	0	-47	-36					ATGATATTATAA	ATGATATTATAA			MIL*	MIL*			AACATTGAAC	TAAATATCAT	1	L	0	0	0	0	0
2074	1331	an	AN4270.1	65.m07444	AO070277000018	0	-20						ATGCCGGTGCATCTTAACTAA	ATGCCGGTGCATCTTAACTAA			MPVHLN*	MPVHLN*			TCTGCTGTTG	TGTATTCTTC	1	TU	0	0	0	0	0
2075	1331	af	AN4270.1	65.m07444	AO070277000018	0			-14				ATGCGAGCGCTGTGA		ATGCGAGCGCTGTGA		MRAL*		MRAL*		TCCCACTCTA	TGTACTCGTC	1	TU	0	0	0	0	0
2078	1331	ao	AN4270.1	65.m07444	AO070277000018	0					-43	-32	ATGGCTGCTTGA			ATGGCTGCTTGA	MAA*			MAA*	TCTTTCTTAT	TTGTTTTTCT	1	TU	0	0	0	0	0
2079	1331	ao	AN4270.1	65.m07444	AO070277000018	0					-20		ATGCAAGGGCTGTGTTGGTAA			ATGCAAGGGCTGTGTTGGTAA	MQGLCW*			MQGLCW*	TGTTTTTCTA	TGTACTCTTC	1	TU	0	0	0	0	0
2081	1333	an	AN7481.1	57.m05862	AO070287000038	0	-48	-28					ATGTTCATTGCGTCTATCTGA	ATGTTCATTGCGTCTATCTGA			MFIASI*	MFIASI*			AACATCCTTT	CTGGGCTGAA	1	D	0	0	0	0	0
2089	1341	an	AN4878.1	59.m09408	AO070338000082	1	-287	-252					ATGATTGCGCGATTGCCGGCTTCATTTATCATCTAA	ATGATTGCGCGATTGCCGGCTTCATTTATCATCTAA			MIARLPASFII*	MIARLPASFII*			CGGTCGTACA	TCTATACCTA	0	K	0	0	0	0	0
2090	1341	af	AN4878.1	59.m09408	AO070338000082	1			-413	-354			ATGCTGAGTCTAGCGGCGATTCGTCGATCACCGTTCTTGTCAACCGTCAATTCCGCTTGA		ATGCTGAGTCTAGCGGCGATTCGTCGATCACCGTTCTTGTCAACCGTCAATTCCGCTTGA		MLSLAAIRRSPFLSTVNSA*		MLSLAAIRRSPFLSTVNSA*		CCTGATCCGA	CTCTTTAGCT	0	K	0	0	0	0	0
2091	1341	ao	AN4878.1	59.m09408	AO070338000082	1					-105	-25	ATGTTATCTTTATTGGCACTCCCTTCTTCACCTCTTCCCAGCTTTCAGCCCCCATCCCTGGGCCTACCGTCTGGGTACTAA			ATGTTATCTTTATTGGCACTCCCTTCTTCACCTCTTCCCAGCTTTCAGCCCCCATCCCTGGGCCTACCGTCTGGGTACTAA	MLSLLALPSSPLPSFQPPSLGLPSGY*			MLSLLALPSSPLPSFQPPSLGLPSGY*	CTTGAGCCGG	ATACACGCCC	0	K	0	0	0	0	0
2117	1358	an	AN4915.1	59.m09401	AO070338000028	1	-320	-303					ATGTTGCAAGGCATCTAA	ATGTTGCAAGGCATCTAA			MLQGI*	MLQGI*			TGCCTTACCT	AATTCTGCAG	0	U	FG05501.1	MG06241.1	NCU06410.1	0	YOR089C
2118	1359	an	AN3600.1	58.m07398	AO070342000153	1	-182	-141					ATGCTTTCATTGTGCTCGCGTGGTGGGTCTGCAGGACAATGA	ATGCTTTCATTGTGCTCGCGTGGTGGGTCTGCAGGACAATGA			MLSLCSRGGSAGQ*	MLSLCSRGGSAGQ*			TGAGCGATAC	ATATCCCTGC	0		0	0	0	0	0
2119	1359	an	AN3600.1	58.m07398	AO070342000153	1	-144	-103					ATGAATATCCCTGCCAACGGTTCAGGCGATTCTGTGAATTGA	ATGAATATCCCTGCCAACGGTTCAGGCGATTCTGTGAATTGA			MNIPANGSGDSVN*	MNIPANGSGDSVN*			CTGCAGGACA	GCTTGACGAT	0		0	0	0	0	0
2120	1359	an	AN3600.1	58.m07398	AO070342000153	1	-74	-54					ATGCGCACAGGTTCTCGGTGA	ATGCGCACAGGTTCTCGGTGA			MRTGSR*	MRTGSR*			ACCCCTTGCC	CCTACTTTTA	0		0	0	0	0	0
2121	1359	af	AN3600.1	58.m07398	AO070342000153	1			-65	-27			ATGGCTCATTGCAGAATTTCCTCATTTTTCGACTGGTGA		ATGGCTCATTGCAGAATTTCCTCATTTTTCGACTGGTGA		MAHCRISSFFDW*		MAHCRISSFFDW*		CGGAAAGCAT	AGAAATAGAG	0		0	0	0	0	0
2122	1359	ao	AN3600.1	58.m07398	AO070342000153	1					-225	-193	ATGGATCATTCTCTGCGTCGGACTGCGTCCTGA			ATGGATCATTCTCTGCGTCGGACTGCGTCCTGA	MDHSLRRTAS*			MDHSLRRTAS*	TCTCTCTTCC	CATAATTCTT	0		0	0	0	0	0
2123	1359	ao	AN3600.1	58.m07398	AO070342000153	1					-67	-23	ATGCAAACCATCCCTGGCAGATCCACCTTAACGCTCGACCGATGA			ATGCAAACCATCCCTGGCAGATCCACCTTAACGCTCGACCGATGA	MQTIPGRSTLTLDR*			MQTIPGRSTLTLDR*	GTGCACGAGA	GAACAGGGAT	0		0	0	0	0	0
2124	1359	ao	AN3600.1	58.m07398	AO070342000153	1					-26	-3	ATGAGAACAGGGATTTTGTTTTAG			ATGAGAACAGGGATTTTGTTTTAG	MRTGILF*			MRTGILF*	CGCTCGACCG	AAATGGATAT	1		0	0	0	0	0
2125	1364	af	AN1090.1	70.m15142	AO070285000059	1			-368	-357			ATGATACTCTGA		ATGATACTCTGA		MIL*		MIL*		GAGCTCTTCA	CCGAATAAAT	0	R	0	0	0	0	0
2126	1364	af	AN1090.1	70.m15142	AO070285000059	1			-333	-247			ATGTATCTTATGCATCATCTGTTTCGATCAATGCATAGTCGTCGTCAGTGTTTGTCCTCGACTCAGCGACGAGATACCCAAACATGA		ATGTATCTTATGCATCATCTGTTTCGATCAATGCATAGTCGTCGTCAGTGTTTGTCCTCGACTCAGCGACGAGATACCCAAACATGA		MYLMHHLFRSMHSRRQCLSSTQRRDTQT*		MYLMHHLFRSMHSRRQCLSSTQRRDTQT*		GTGTCCTTAT	GAGAACCATA	0	R	0	0	0	0	0
2127	1364	af	AN1090.1	70.m15142	AO070285000059	1			-324	-247			ATGCATCATCTGTTTCGATCAATGCATAGTCGTCGTCAGTGTTTGTCCTCGACTCAGCGACGAGATACCCAAACATGA		ATGCATCATCTGTTTCGATCAATGCATAGTCGTCGTCAGTGTTTGTCCTCGACTCAGCGACGAGATACCCAAACATGA		MHHLFRSMHSRRQCLSSTQRRDTQT*		MHHLFRSMHSRRQCLSSTQRRDTQT*		TATGTATCTT	GAGAACCATA	0	R	0	0	0	0	0
2128	1364	af	AN1090.1	70.m15142	AO070285000059	1			-303	-247			ATGCATAGTCGTCGTCAGTGTTTGTCCTCGACTCAGCGACGAGATACCCAAACATGA		ATGCATAGTCGTCGTCAGTGTTTGTCCTCGACTCAGCGACGAGATACCCAAACATGA		MHSRRQCLSSTQRRDTQT*		MHSRRQCLSSTQRRDTQT*		GTTTCGATCA	GAGAACCATA	0	R	0	0	0	0	0
2129	1364	af	AN1090.1	70.m15142	AO070285000059	1			-250	-236			ATGAGAGAACCATAG		ATGAGAGAACCATAG		MREP*		MREP*		ATACCCAAAC	ACATGCTGCC	0	R	0	0	0	0	0
2130	1364	af	AN1090.1	70.m15142	AO070285000059	1			-233	-213			ATGCTGCCAGAAACAAACTAA		ATGCTGCCAGAAACAAACTAA		MLPETN*		MLPETN*		AACCATAGAC	CTTTGTCGCA	0	R	0	0	0	0	0
2131	1364	ao	AN1090.1	70.m15142	AO070285000059	1					-350	-183	ATGATATTCTTTGTCCTTTCGTGCAGAACGTCAAAATTGCCTACGATCTTACATCGTCATGATTGCGCTCCTCCTGGCCCTTTCATTGGTCTCATGTGGTCTCAGAAACCAGTGGTACCTACTCAGGTACCTGCCTGGCGGGAGTGCTATTGGAGTTGCTGCGTTTAA			ATGATATTCTTTGTCCTTTCGTGCAGAACGTCAAAATTGCCTACGATCTTACATCGTCATGATTGCGCTCCTCCTGGCCCTTTCATTGGTCTCATGTGGTCTCAGAAACCAGTGGTACCTACTCAGGTACCTGCCTGGCGGGAGTGCTATTGGAGTTGCTGCGTTTAA	MIFFVLSCRTSKLPTILHRHDCAPPGPFIGLMWSQKPVVPTQVPAWRECYWSCCV*			MIFFVLSCRTSKLPTILHRHDCAPPGPFIGLMWSQKPVVPTQVPAWRECYWSCCV*	GTGGTAGGTA	TCTATCTCCC	0	R	0	0	0	0	0
2132	1364	ao	AN1090.1	70.m15142	AO070285000059	1					-292	-116	ATGATTGCGCTCCTCCTGGCCCTTTCATTGGTCTCATGTGGTCTCAGAAACCAGTGGTACCTACTCAGGTACCTGCCTGGCGGGAGTGCTATTGGAGTTGCTGCGTTTAATCTATCTCCCGTCTCATTCCAGGTTTTCAGGCACCCCTGTTACAACTTGCGTCAGCTGCGGACCTGA			ATGATTGCGCTCCTCCTGGCCCTTTCATTGGTCTCATGTGGTCTCAGAAACCAGTGGTACCTACTCAGGTACCTGCCTGGCGGGAGTGCTATTGGAGTTGCTGCGTTTAATCTATCTCCCGTCTCATTCCAGGTTTTCAGGCACCCCTGTTACAACTTGCGTCAGCTGCGGACCTGA	MIALLLALSLVSCGLRNQWYLLRYLPGGSAIGVAAFNLSPVSFQVFRHPCYNLRQLRT*			MIALLLALSLVSCGLRNQWYLLRYLPGGSAIGVAAFNLSPVSFQVFRHPCYNLRQLRT*	TTACATCGTC	CTTGATCAAC	0	R	0	0	0	0	0
2133	1364	ao	AN1090.1	70.m15142	AO070285000059	1					-257	-183	ATGTGGTCTCAGAAACCAGTGGTACCTACTCAGGTACCTGCCTGGCGGGAGTGCTATTGGAGTTGCTGCGTTTAA			ATGTGGTCTCAGAAACCAGTGGTACCTACTCAGGTACCTGCCTGGCGGGAGTGCTATTGGAGTTGCTGCGTTTAA	MWSQKPVVPTQVPAWRECYWSCCV*			MWSQKPVVPTQVPAWRECYWSCCV*	CATTGGTCTC	TCTATCTCCC	0	R	0	0	0	0	0
2149	1381	af	AN4390.1	58.m07933	AO070261000036	0			-50	-27			ATGACATTACTGACCTTGCTTTGA		ATGACATTACTGACCTTGCTTTGA		MTLLTLL*		MTLLTLL*		AAGCCTGCTA	GAATCTAGTA	1		0	0	0	0	0
2152	1381	ao	AN4390.1	58.m07933	AO070261000036	0					-47	-3	ATGTCCAACGTGCTAACAGTATCTCCATTAGAAGAAATCACATAA			ATGTCCAACGTGCTAACAGTATCTCCATTAGAAGAAATCACATAA	MSNVLTVSPLEEIT*			MSNVLTVSPLEEIT*	GACCTTGATC	CAATGTTCAT	1		0	0	0	0	0
2171	1387	af	AN1832.1	58.m07674	AO070318000085	0			-50	-21			ATGCAAGAGTCACGCACCATCCAACCTTGA		ATGCAAGAGTCACGCACCATCCAACCTTGA		MQESRTIQP*		MQESRTIQP*		TCTGGCTACA	AAAAGAAAAT	1		0	0	0	0	0
2179	1396	conserved	AN5452.1	69.m15743	AO070239000031	1	-105	-85	-103	-83	-106	-86	ATGGGAdTrvTwyyAywhTrA	ATGGGAGTACTTTTATTATAA	ATGGGATTGATTCTATTCTGA	ATGGGAATGGTATCACATTAA	MGvlll*	MGVLLL*	MGLILF*	MGMVSH*	mTCTGCAGCA	AGwCAmmywd	0	A	0	MG06457.1	0	0	0
2181	1396	ao	AN5452.1	69.m15743	AO070239000031	1					-100	-86	ATGGTATCACATTAA			ATGGTATCACATTAA	MVSH*			MVSH*	AGCAATGGGA	AGTCAACTTT	0	A	0	MG06457.1	0	0	0
2185	1399	an	AN6524.1	62.m03113	AO070270000023	0	-58	-23					ATGGGCTCTAAGTTATTGAAACTGTGCCGCCCGTAG	ATGGGCTCTAAGTTATTGAAACTGTGCCGCCCGTAG			MGSKLLKLCRP*	MGSKLLKLCRP*			AGGTCGGTAG	GATTACGAAT	1		0	0	0	0	0
2194	1400	af	AN4674.1	71.m15664	AO070284000032	1			-251	-222			ATGCTCTTAGCGTCTTATAGCTTGCCGTAA		ATGCTCTTAGCGTCTTATAGCTTGCCGTAA		MLLASYSLP*		MLLASYSLP*		CACGGAGCAG	ACGCTTCGTC	0	GO	0	0	0	0	0
2197	1400	ao	AN4674.1	71.m15664	AO070284000032	1					-380	-345	ATGTGTTCGTGGTCTGTGGCTGATCGACGTCAGTAA			ATGTGTTCGTGGTCTGTGGCTGATCGACGTCAGTAA	MCSWSVADRRQ*			MCSWSVADRRQ*	GCCCATTTCC	TTAACTGCCA	0	GO	0	0	0	0	0
2200	1407	af	AN5983.1	72.m19943	AO070340000297	0			-24	-4			ATGCTTGCCCGAAGTCGATGA		ATGCTTGCCCGAAGTCGATGA		MLARSR*		MLARSR*		GTCTATTTTG	ACCATGACGC	1	S	0	0	0	0	0
2201	1407	ao	AN5983.1	72.m19943	AO070340000297	0					-54	-43	ATGTATATCTAA			ATGTATATCTAA	MYI*			MYI*	GCATCTCACA	ATACATGTGC	1	S	0	0	0	0	0
2202	1407	ao	AN5983.1	72.m19943	AO070340000297	0					-38	-27	ATGTGCCCTTAG			ATGTGCCCTTAG	MCP*			MCP*	ATCTAAATAC	ACTTTTTGAA	1	S	0	0	0	0	0
2203	1408	conserved	AN5966.1	72.m19965	AO070340000323	1	-100	-83	-175	-158	-77	-60	ATGAwCGGGATACCGTGA	ATGATCGGGATACCGTGA	ATGAACGGGATACCGTGA	ATGATCGGGATACCGTGA	MiGIP*	MIGIP*	MNGIP*	MIGIP*	TyTGyrATCr	AmyyydysyC	0	R	0	0	0	0	0
2211	1421	an	AN6730.1	65.m07240	AO070339000174	0	-34	-17					ATGATACGTCGAGATTGA	ATGATACGTCGAGATTGA			MIRRD*	MIRRD*			AGGCTCCCGC	TCGTTCAACG	1	F	0	0	0	0	0
2213	1433	af	AN5725.1	54.m06845	AO070324000126	0			-23	-3			ATGTCTCTTGTCTCGTGTTGA		ATGTCTCTTGTCTCGTGTTGA		MSLVSC*		MSLVSC*		TTCATTGACT	TCATGATGCT	1	M	0	0	NCU06779.1	YNL048W	YNL048W
2215	1433	ao	AN5725.1	54.m06845	AO070324000126	0					-43	-29	ATGAGACTACAATAG			ATGAGACTACAATAG	MRLQ*			MRLQ*	CAACGTACGG	TGATGTCCGT	1	M	0	0	NCU06779.1	YNL048W	YNL048W
2216	1433	ao	AN5725.1	54.m06845	AO070324000126	0					-26	-6	ATGTCCGTTGTCTTTTGTTAG			ATGTCCGTTGTCTTTTGTTAG	MSVVFC*			MSVVFC*	TACAATAGTG	CCATGATGCT	1	M	0	0	NCU06779.1	YNL048W	YNL048W
2217	1436	an	AN1510.1	55.m03022	AO070334000228	1	-146	-132					ATGGCCACGTTCTGA	ATGGCCACGTTCTGA			MATF*	MATF*			TTGGACGTTT	TTAGCCACTC	0	OU	0	0	0	0	0
2218	1436	af	AN1510.1	55.m03022	AO070334000228	1			-227	-186			ATGGTCTTCCAGTCTCCTTGGCTCCGTCTTTGCTTTGATTGA		ATGGTCTTCCAGTCTCCTTGGCTCCGTCTTTGCTTTGATTGA		MVFQSPWLRLCFD*		MVFQSPWLRLCFD*		TTGCTATTGC	TAATCCTCGA	0	OU	0	0	0	0	0
2219	1436	af	AN1510.1	55.m03022	AO070334000228	1			-85	-74			ATGCATTTCTGA		ATGCATTTCTGA		MHF*		MHF*		TTACTAGTAT	GAACTTGATC	0	OU	0	0	0	0	0
2220	1436	ao	AN1510.1	55.m03022	AO070334000228	1					-289	-248	ATGATTTTCTCGGTCGCATTGGATTTTGTTGCGTCTTTTTAA			ATGATTTTCTCGGTCGCATTGGATTTTGTTGCGTCTTTTTAA	MIFSVALDFVASF*			MIFSVALDFVASF*	TCTCTTTTTT	TTTTTTCGTT	0	OU	0	0	0	0	0
2221	1436	ao	AN1510.1	55.m03022	AO070334000228	1					-166	-140	ATGAGTTTGTTTAGACCCTTGATCTGA			ATGAGTTTGTTTAGACCCTTGATCTGA	MSLFRPLI*			MSLFRPLI*	ACAGAAGATC	TTGACAATTT	0	OU	0	0	0	0	0
2235	1441	an	AN8445.1	52.m03678	AO070341000302	0	-51	-25					ATGAAACAAGGGCGATCAGGGCTTTAG	ATGAAACAAGGGCGATCAGGGCTTTAG			MKQGRSGL*	MKQGRSGL*			CCCTTCCTGC	GACACGTCCG	1	R	0	0	0	0	0
2281	1457	af	AN7418.1	57.m05460	AO070323000154	0			-54	-34			ATGCCTACTCTTCTTTATTGA		ATGCCTACTCTTCTTTATTGA		MPTLLY*		MPTLLY*		TTGCAAGCAC	TATGCAAACT	1	HC	0	0	0	0	0
2287	1457	ao	AN7418.1	57.m05460	AO070323000154	0					-55	-35	ATGTTACGCTTCCGGCCATAG			ATGTTACGCTTCCGGCCATAG	MLRFRP*			MLRFRP*	GGCACTTTAA	CTCAGATAAG	1	HC	0	0	0	0	0
2312	1473	an	AN5307.1	70.m15393	AO070316000053	0	-36	-19					ATGCAGGTGAAAGGATGA	ATGCAGGTGAAAGGATGA			MQVKG*	MQVKG*			CAGCGGAAGG	ATCAAGCCAG	1	C	0	0	0	0	0
2322	1473	ao	AN5307.1	70.m15393	AO070316000053	0					-57	-16	ATGTCAGTGTCTGCAACTCCACCCGGAGAGGCTGGTTCCTAA			ATGTCAGTGTCTGCAACTCCACCCGGAGAGGCTGGTTCCTAA	MSVSATPPGEAGS*			MSVSATPPGEAGS*	TTCGATCAAT	AATAATATAC	1	C	0	0	0	0	0
2332	1488	an	AN1097.1	70.m15134	AO070285000045	1	-173	-162					ATGGCTCGATAA	ATGGCTCGATAA			MAR*	MAR*			CCGATAGTCG	GATACTCCAC	0	T	0	0	0	0	0
2333	1488	an	AN1097.1	70.m15134	AO070285000045	1	-49	-29					ATGACTTATAACTCTTTCTAA	ATGACTTATAACTCTTTCTAA			MTYNSF*	MTYNSF*			TACATACTTC	AGGCCTTCTT	1	T	0	0	0	0	0
2359	1510	an	AN7759.1	71.m15791	AO070286000006	1	-129	-13					ATGCTCTCCGCATCTCTAATCTTTGCTCTCCCCTCCTTCACTGCTTCTGAACATCTCGCTACACCCGACCCAATGCTCTGCCCACGGCGAATCACCACTCATCAGCCTTGGGCTTGA	ATGCTCTCCGCATCTCTAATCTTTGCTCTCCCCTCCTTCACTGCTTCTGAACATCTCGCTACACCCGACCCAATGCTCTGCCCACGGCGAATCACCACTCATCAGCCTTGGGCTTGA			MLSASLIFALPSFTASEHLATPDPMLCPRRITTHQPWA*	MLSASLIFALPSFTASEHLATPDPMLCPRRITTHQPWA*			TGAACATCTA	ACCCCGCTCA	0	WV	0	0	0	0	0
2360	1510	an	AN7759.1	71.m15791	AO070286000006	1	-57	-13					ATGCTCTGCCCACGGCGAATCACCACTCATCAGCCTTGGGCTTGA	ATGCTCTGCCCACGGCGAATCACCACTCATCAGCCTTGGGCTTGA			MLCPRRITTHQPWA*	MLCPRRITTHQPWA*			ACCCGACCCA	ACCCCGCTCA	1	WV	0	0	0	0	0
2386	1523	ao	AN3015.1	59.m09005	AO070337000100	0					-49	-20	ATGAGTATACAGAACCTACACACTCACTAG			ATGAGTATACAGAACCTACACACTCACTAG	MSIQNLHTH*			MSIQNLHTH*	GTGTTTATAT	ACTCCCTCAA	1	S	0	0	0	0	0
2390	1529	an	AN9384.1	54.m06360	AO070253000015	0	-59	-30					ATGCCCAGGACCAACGGACTGACTGACTGA	ATGCCCAGGACCAACGGACTGACTGACTGA			MPRTNGLTD*	MPRTNGLTD*			ATTCGCCAGG	CTGACGAACT	1	QI	0	0	0	0	0
2396	1533	an	AN2053.1	58.m07641	AO070292000020	1	-76	-50					ATGGGCCTAGCTCTGTTACACTCCTAA	ATGGGCCTAGCTCTGTTACACTCCTAA			MGLALLHS*	MGLALLHS*			ACTTTTGATA	TTACAATTCG	0	F	0	0	NCU00356.1	0	0
2400	1533	af	AN2053.1	58.m07641	AO070292000020	1			-115	-53			ATGGTGGGCAGTGGTTCGTGCAAGCCACGAAATGTTAACCATGACTTGATTGCCGCCGTTTGA		ATGGTGGGCAGTGGTTCGTGCAAGCCACGAAATGTTAACCATGACTTGATTGCCGCCGTTTGA		MVGSGSCKPRNVNHDLIAAV*		MVGSGSCKPRNVNHDLIAAV*		CCTTGGCTTC	TTTATCCACT	0	F	0	0	NCU00356.1	0	0
2401	1533	af	AN2053.1	58.m07641	AO070292000020	1			-84	-67			ATGTTAACCATGACTTGA		ATGTTAACCATGACTTGA		MLTMT*		MLTMT*		AAGCCACGAA	TTGCCGCCGT	0	F	0	0	NCU00356.1	0	0
2403	1533	ao	AN2053.1	58.m07641	AO070292000020	0					-54	-10	ATGTCCCGTTTCTACCTCCAGGAAGGGACTTATATCACACTATAA			ATGTCCCGTTTCTACCTCCAGGAAGGGACTTATATCACACTATAA	MSRFYLQEGTYITL*			MSRFYLQEGTYITL*	GTCCCATTTT	TCGAAAGCAA	1	F	0	0	NCU00356.1	0	0
2410	1534	af	AN2534.1	59.m08439	AO070300000048	0			-50	-27			ATGCCTCTTTTCTCACCATTGTGA		ATGCCTCTTTTCTCACCATTGTGA		MPLFSPL*		MPLFSPL*		CCCTCCTACC	AATTGACTGG	1	G	0	0	0	0	0
2412	1536	af	AN7710.1	71.m15734	AO070325000117	1			-233	-90			ATGTTTGCCACTTGCGTCCTACTTTATCCCGGTCCAATCCACTCCAACGATTCGTTCCCTTTCCGCTTAACCCAAACAGCTCCCATATTTGCCTTTCTTTACGGCTACTTTTACCCACTTCCTCTCCCTTCATCTCTCCTCTAG		ATGTTTGCCACTTGCGTCCTACTTTATCCCGGTCCAATCCACTCCAACGATTCGTTCCCTTTCCGCTTAACCCAAACAGCTCCCATATTTGCCTTTCTTTACGGCTACTTTTACCCACTTCCTCTCCCTTCATCTCTCCTCTAG		MFATCVLLYPGPIHSNDSFPFRLTQTAPIFAFLYGYFYPLPLPSSLL*		MFATCVLLYPGPIHSNDSFPFRLTQTAPIFAFLYGYFYPLPLPSSLL*		CAGCCCGTTG	CAGACTTCTT	0	R	FG05132.1	MG08166.1	0	0	0
2438	1561	ao	AN2060.1	57.m05964	AO070328000072	0					-52	-32	ATGAGAGAAGTATGCTTCTGA			ATGAGAGAAGTATGCTTCTGA	MREVCF*			MREVCF*	TGTCTTTGTT	CTAGACTTGT	1		0	0	0	0	0
2465	1603	an	AN5720.1	54.m07022	AO070324000130	1	-92	-18					ATGTTGGAAATCTCTGCGCGGCGCTCTCGCACCAGCTATTATCTCATGCGACCTTTTCAATACTCATATAATTGA	ATGTTGGAAATCTCTGCGCGGCGCTCTCGCACCAGCTATTATCTCATGCGACCTTTTCAATACTCATATAATTGA			MLEISARRSRTSYYLMRPFQYSYN*	MLEISARRSRTSYYLMRPFQYSYN*			CAAGTTTCAA	GTGTCTACCC	0	S	0	MG02855.1	0	YOL092W	0
2466	1603	an	AN5720.1	54.m07022	AO070324000130	1	-47	-18					ATGCGACCTTTTCAATACTCATATAATTGA	ATGCGACCTTTTCAATACTCATATAATTGA			MRPFQYSYN*	MRPFQYSYN*			CTATTATCTC	GTGTCTACCC	1	S	0	MG02855.1	0	YOL092W	0
2467	1603	af	AN5720.1	54.m07022	AO070324000130	1			-274	-245			ATGCGGCCACCAAACGGGAAGAGCTGCTAA		ATGCGGCCACCAAACGGGAAGAGCTGCTAA		MRPPNGKSC*		MRPPNGKSC*		CTCTTATCGG	GAGCTGCTAT	0	S	0	MG02855.1	0	YOL092W	0
2468	1603	af	AN5720.1	54.m07022	AO070324000130	1			-236	-129			ATGAATAGAGTCGCAGCAAGGAAAATCTTCATTTTTCGCTTTGACAACTTTTTTTGGTTTCAGATAGCCGAAAGTCGAAAAGCTGGATGTACTTTGGCTAGTGACTAG		ATGAATAGAGTCGCAGCAAGGAAAATCTTCATTTTTCGCTTTGACAACTTTTTTTGGTTTCAGATAGCCGAAAGTCGAAAAGCTGGATGTACTTTGGCTAGTGACTAG		MNRVAARKIFIFRFDNFFWFQIAESRKAGCTLASD*		MNRVAARKIFIFRFDNFFWFQIAESRKAGCTLASD*		AAGAGCTGCT	AACTCGTTCC	0	S	0	MG02855.1	0	YOL092W	0
2469	1603	af	AN5720.1	54.m07022	AO070324000130	1			-150	-136			ATGTACTTTGGCTAG		ATGTACTTTGGCTAG		MYFG*		MYFG*		GAAAAGCTGG	TGACTAGAAC	0	S	0	MG02855.1	0	YOL092W	0
2470	1603	ao	AN5720.1	54.m07022	AO070324000130	1					-338	-246	ATGCCCCCTCACAATTCTCGCAGCTTAGTAAAACATTCTCCGAGAGGCAGCGGTTCCGCCCGTAACTATAATAAAATCCTACTTCGACCGTGA			ATGCCCCCTCACAATTCTCGCAGCTTAGTAAAACATTCTCCGAGAGGCAGCGGTTCCGCCCGTAACTATAATAAAATCCTACTTCGACCGTGA	MPPHNSRSLVKHSPRGSGSARNYNKILLRP*			MPPHNSRSLVKHSPRGSGSARNYNKILLRP*	GGTGAAAAAG	CACTTGCTTC	0	S	0	MG02855.1	0	YOL092W	0
2471	1603	ao	AN5720.1	54.m07022	AO070324000130	1					-231	-142	ATGCGTGGGATTGTCCATATCTTGTTCGATGAGAACACTATCGGGAAAATTTCAATCATTAGATTGGATTTCGCCACTGCACTATATTAG			ATGCGTGGGATTGTCCATATCTTGTTCGATGAGAACACTATCGGGAAAATTTCAATCATTAGATTGGATTTCGCCACTGCACTATATTAG	MRGIVHILFDENTIGKISIIRLDFATALY*			MRGIVHILFDENTIGKISIIRLDFATALY*	TGCTTCTGCC	TGACTCATGT	0	S	0	MG02855.1	0	YOL092W	0
2472	1603	ao	AN5720.1	54.m07022	AO070324000130	1					-203	-93	ATGAGAACACTATCGGGAAAATTTCAATCATTAGATTGGATTTCGCCACTGCACTATATTAGTGACTCATGTGCTATCACGTTACATCCGAGCGCTTCGCGAGATAGCTAA			ATGAGAACACTATCGGGAAAATTTCAATCATTAGATTGGATTTCGCCACTGCACTATATTAGTGACTCATGTGCTATCACGTTACATCCGAGCGCTTCGCGAGATAGCTAA	MRTLSGKFQSLDWISPLHYISDSCAITLHPSASRDS*			MRTLSGKFQSLDWISPLHYISDSCAITLHPSASRDS*	ATCTTGTTCG	CTTTTTCCTT	0	S	0	MG02855.1	0	YOL092W	0
2473	1603	ao	AN5720.1	54.m07022	AO070324000130	1					-135	-97	ATGTGCTATCACGTTACATCCGAGCGCTTCGCGAGATAG			ATGTGCTATCACGTTACATCCGAGCGCTTCGCGAGATAG	MCYHVTSERFAR*			MCYHVTSERFAR*	TTAGTGACTC	CTAACTTTTT	0	S	0	MG02855.1	0	YOL092W	0
2479	1613	an	AN3460.1	59.m09482	AO070265000037	1	-71	-51					ATGCCTGCCCCGCAAATTTAG	ATGCCTGCCCCGCAAATTTAG			MPAPQI*	MPAPQI*			TTTCGATTCT	TATGACCGGT	0	A	0	0	NCU02402.1	0	0
2480	1613	af	AN3460.1	59.m09482	AO070265000037	1			-226	-161			ATGGAGATAAATTTCGGACTTAAGAAGGTAGCTAACAAGACACGCGGCGACGCGACTCAGCAATAG		ATGGAGATAAATTTCGGACTTAAGAAGGTAGCTAACAAGACACGCGGCGACGCGACTCAGCAATAG		MEINFGLKKVANKTRGDATQQ*		MEINFGLKKVANKTRGDATQQ*		ACTTGACCCG	ATGCTAATTA	0	A	0	0	NCU02402.1	0	0
2481	1613	af	AN3460.1	59.m09482	AO070265000037	1			-160	-47			ATGCTAATTATTGCGCTGAGCTCCATATTAAGTCTCACCTTGGGATTCTTTCAGGCGCAGCCGTGTCCCGTTTTTGCAAATGCTCTGCAGCGGGAAGACTTGACGCATCGCTAG		ATGCTAATTATTGCGCTGAGCTCCATATTAAGTCTCACCTTGGGATTCTTTCAGGCGCAGCCGTGTCCCGTTTTTGCAAATGCTCTGCAGCGGGAAGACTTGACGCATCGCTAG		MLIIALSSILSLTLGFFQAQPCPVFANALQREDLTHR*		MLIIALSSILSLTLGFFQAQPCPVFANALQREDLTHR*		TCAGCAATAG	GCTAGCATGA	0	A	0	0	NCU02402.1	0	0
2482	1613	af	AN3460.1	59.m09482	AO070265000037	1			-81	-58			ATGCTCTGCAGCGGGAAGACTTGA		ATGCTCTGCAGCGGGAAGACTTGA		MLCSGKT*		MLCSGKT*		GTTTTTGCAA	CGCATCGCTA	0	A	0	0	NCU02402.1	0	0
2483	1613	af	AN3460.1	59.m09482	AO070265000037	1			-40	-23			ATGATTACAATTTCATGA		ATGATTACAATTTCATGA		MITIS*		MITIS*		CTAGGCTAGC	CCAAAAACTT	1	A	0	0	NCU02402.1	0	0
2484	1613	af	AN3460.1	59.m09482	AO070265000037	0			-26				ATGACCAAAAACTTATCCGCTCCTTGA		ATGACCAAAAACTTATCCGCTCCTTGA		MTKNLSAP*		MTKNLSAP*		TTACAATTTC	TGATGGCGTC	1	A	0	0	NCU02402.1	0	0
2485	1613	ao	AN3460.1	59.m09482	AO070265000037	1					-136	-89	ATGGGTTTTTATTTGACCTTGATCGGAAGGCCGCTAGATCCTGTGTAG			ATGGGTTTTTATTTGACCTTGATCGGAAGGCCGCTAGATCCTGTGTAG	MGFYLTLIGRPLDPV*			MGFYLTLIGRPLDPV*	TTCGCATCCA	TGGCTCTTGA	0	A	0	0	NCU02402.1	0	0
2486	1613	ao	AN3460.1	59.m09482	AO070265000037	1					-45	-19	ATGAATAATTACTGTTCATTTGTATGA			ATGAATAATTACTGTTCATTTGTATGA	MNNYCSFV*			MNNYCSFV*	TACTTCTAGT	CCCGGTCGCA	1	A	0	0	NCU02402.1	0	0
2487	1615	an	AN5114.1	54.m06909	AO070291000065	1	-234	-193					ATGGCTGATACAGTGAAGAAACATTGTTATTCTTGCTTCTAA	ATGGCTGATACAGTGAAGAAACATTGTTATTCTTGCTTCTAA			MADTVKKHCYSCF*	MADTVKKHCYSCF*			TCCGCCTTCG	TTCAGTCTCG	0	L	FG00834.1	MG06959.1	0	YNL072W	0
2488	1615	an	AN5114.1	54.m06909	AO070291000065	1	-174	-130					ATGCACCATTGTACGAGTTTGTCTTTTCGAACCAGCCAAATTTAA	ATGCACCATTGTACGAGTTTGTCTTTTCGAACCAGCCAAATTTAA			MHHCTSLSFRTSQI*	MHHCTSLSFRTSQI*			CGTCACATGC	GTGGAACGCG	0	L	FG00834.1	MG06959.1	0	YNL072W	0
2489	1615	af	AN5114.1	54.m06909	AO070291000065	1			-310	-278			ATGCAGGGGAACACCCTGTGCCTCGTGCACTAA		ATGCAGGGGAACACCCTGTGCCTCGTGCACTAA		MQGNTLCLVH*		MQGNTLCLVH*		GACGTATCTC	TAGGATGTTA	0	L	FG00834.1	MG06959.1	0	YNL072W	0
2490	1615	af	AN5114.1	54.m06909	AO070291000065	1			-273	-235			ATGTTAAGGGAGGGGAGTTTAAGCGTTGGGCAAGAGTAA		ATGTTAAGGGAGGGGAGTTTAAGCGTTGGGCAAGAGTAA		MLREGSLSVGQE*		MLREGSLSVGQE*		CACTAATAGG	AGATGATGGT	0	L	FG00834.1	MG06959.1	0	YNL072W	0
2491	1615	af	AN5114.1	54.m06909	AO070291000065	1			-232	-92			ATGATGGTTACTTGGGAGGGGAATTACATTGGTATTCATGATGGGCGGCGAACAACGCGCGGAAGTGCCGCTAGTCCGGAACGGTTCTTGACGCGTCCAAACCCTCCCAAAGTGCAGTCGCCAGGCCATACAAGCATGTGA		ATGATGGTTACTTGGGAGGGGAATTACATTGGTATTCATGATGGGCGGCGAACAACGCGCGGAAGTGCCGCTAGTCCGGAACGGTTCTTGACGCGTCCAAACCCTCCCAAAGTGCAGTCGCCAGGCCATACAAGCATGTGA		MMVTWEGNYIGIHDGRRTTRGSAASPERFLTRPNPPKVQSPGHTSM*		MMVTWEGNYIGIHDGRRTTRGSAASPERFLTRPNPPKVQSPGHTSM*		AAGAGTAAAG	GTGTCTTCCA	0	L	FG00834.1	MG06959.1	0	YNL072W	0
2492	1615	af	AN5114.1	54.m06909	AO070291000065	1			-229	-92			ATGGTTACTTGGGAGGGGAATTACATTGGTATTCATGATGGGCGGCGAACAACGCGCGGAAGTGCCGCTAGTCCGGAACGGTTCTTGACGCGTCCAAACCCTCCCAAAGTGCAGTCGCCAGGCCATACAAGCATGTGA		ATGGTTACTTGGGAGGGGAATTACATTGGTATTCATGATGGGCGGCGAACAACGCGCGGAAGTGCCGCTAGTCCGGAACGGTTCTTGACGCGTCCAAACCCTCCCAAAGTGCAGTCGCCAGGCCATACAAGCATGTGA		MVTWEGNYIGIHDGRRTTRGSAASPERFLTRPNPPKVQSPGHTSM*		MVTWEGNYIGIHDGRRTTRGSAASPERFLTRPNPPKVQSPGHTSM*		AGTAAAGATG	GTGTCTTCCA	0	L	FG00834.1	MG06959.1	0	YNL072W	0
2493	1615	af	AN5114.1	54.m06909	AO070291000065	1			-195	-142			ATGATGGGCGGCGAACAACGCGCGGAAGTGCCGCTAGTCCGGAACGGTTCTTGA		ATGATGGGCGGCGAACAACGCGCGGAAGTGCCGCTAGTCCGGAACGGTTCTTGA		MMGGEQRAEVPLVRNGS*		MMGGEQRAEVPLVRNGS*		ATTGGTATTC	CGCGTCCAAA	0	L	FG00834.1	MG06959.1	0	YNL072W	0
2494	1615	af	AN5114.1	54.m06909	AO070291000065	1			-192	-142			ATGGGCGGCGAACAACGCGCGGAAGTGCCGCTAGTCCGGAACGGTTCTTGA		ATGGGCGGCGAACAACGCGCGGAAGTGCCGCTAGTCCGGAACGGTTCTTGA		MGGEQRAEVPLVRNGS*		MGGEQRAEVPLVRNGS*		GGTATTCATG	CGCGTCCAAA	0	L	FG00834.1	MG06959.1	0	YNL072W	0
2495	1615	ao	AN5114.1	54.m06909	AO070291000065	1					-129	-94	ATGGTTTGGGACGCGTCTAGAGCTCAACCTTCATAG			ATGGTTTGGGACGCGTCTAGAGCTCAACCTTCATAG	MVWDASRAQPS*			MVWDASRAQPS*	CTAGTCCGGA	CTTACAACTA	0	L	FG00834.1	MG06959.1	0	YNL072W	0
2497	1617	an	AN1488.1	55.m02995	AO070334000200	1	-82	-44					ATGCTTGCGTTGAAGCGACTACGGCCTTCCACATCTTGA	ATGCTTGCGTTGAAGCGACTACGGCCTTCCACATCTTGA			MLALKRLRPSTS*	MLALKRLRPSTS*			ACATCTGTCA	CGTCGTCAAT	0	O	0	0	0	0	0
2498	1617	af	AN1488.1	55.m02995	AO070334000200	1			-91	-74			ATGCCTTATTGCACTTGA		ATGCCTTATTGCACTTGA		MPYCT*		MPYCT*		AGACTTTCTA	CTTTGGCTGC	0	O	0	0	0	0	0
2499	1617	ao	AN1488.1	55.m02995	AO070334000200	1					-79	-68	ATGTCCCTCTGA			ATGTCCCTCTGA	MSL*			MSL*	GCCGCTGTCG	CAACCTTACT	0	O	0	0	0	0	0
2539	1634	an	AN3759.1	65.m07497	AO070309000045	0	-59	-33					ATGGCATGCTTCTTCAGCACAACTTAA	ATGGCATGCTTCTTCAGCACAACTTAA			MACFFSTT*	MACFFSTT*			CGTTCGCCGC	TCAGGGAACC	1	O	0	0	0	0	0
2548	1635	af	AN6894.1	71.m16019	AO070314000028	0			-60	-25			ATGAAATCAACTACACAGATTGATTTGGCCAAATAA		ATGAAATCAACTACACAGATTGATTTGGCCAAATAA		MKSTTQIDLAK*		MKSTTQIDLAK*		GCTGAAGATC	ATCCTAACTC	1	O	FG05403.1	0	NCU00181.1	0	0
2589	1659	af	AN3620.1	58.m07407	AO070342000132	0			-43	-5			ATGCGTTTCTCCGGCTATCTGTACAGACAAGAGTCCTAG		ATGCGTTTCTCCGGCTATCTGTACAGACAAGAGTCCTAG		MRFSGYLYRQES*		MRFSGYLYRQES*		TCATTGTTTT	GGCCATGGAA	1	DL	FG00281.1	MG03676.1	0	0	0
2596	1668	an	AN5633.1	58.m07557	AO070301000032	1	-174	-160					ATGTCGGGACTTTGA	ATGTCGGGACTTTGA			MSGL*	MSGL*			CGTTCGGGCA	AGTGCAACTC	0	P	0	0	0	0	0
2597	1668	af	AN5633.1	58.m07557	AO070301000032	1			-228	-211			ATGGACGTAGGATATTGA		ATGGACGTAGGATATTGA		MDVGY*		MDVGY*		CGTCAACCTC	TGCGCAACTG	0	P	0	0	0	0	0
2598	1668	af	AN5633.1	58.m07557	AO070301000032	1			-211	-137			ATGCGCAACTGTCTACAAGGAACAACTGCAATCGGGAAGTTTCGGGCCTTCTTTCCCGCAGGCCCCCAGCTTTGA		ATGCGCAACTGTCTACAAGGAACAACTGCAATCGGGAAGTTTCGGGCCTTCTTTCCCGCAGGCCCCCAGCTTTGA		MRNCLQGTTAIGKFRAFFPAGPQL*		MRNCLQGTTAIGKFRAFFPAGPQL*		TAGGATATTG	TTCCGGCGTA	0	P	0	0	0	0	0
2599	1668	ao	AN5633.1	58.m07557	AO070301000032	1					-216	-166	ATGTACCCACTTTGTAGTGAATGTGTCGCACTGGGACTGGGACTACCGTAG			ATGTACCCACTTTGTAGTGAATGTGTCGCACTGGGACTGGGACTACCGTAG	MYPLCSECVALGLGLP*			MYPLCSECVALGLGLP*	CTCTTACTGC	CCGGGGAAAT	0	P	0	0	0	0	0
2600	1668	ao	AN5633.1	58.m07557	AO070301000032	1					-196	-125	ATGTGTCGCACTGGGACTGGGACTACCGTAGCCGGGGAAATTCGGCCATTCGTTCCCGCACGTTACTCTTGA			ATGTGTCGCACTGGGACTGGGACTACCGTAGCCGGGGAAATTCGGCCATTCGTTCCCGCACGTTACTCTTGA	MCRTGTGTTVAGEIRPFVPARYS*			MCRTGTGTTVAGEIRPFVPARYS*	TTTGTAGTGA	TTTGGTTTCC	0	P	0	0	0	0	0
2613	1669	ao	AN1986.1	58.m07593	AO070301000073	0					-57	-40	ATGATATCCATCTCCTAG			ATGATATCCATCTCCTAG	MISIS*			MISIS*	CCCTCTTCGA	AAGACAGTCT	1	P	0	0	0	0	0
2616	1671	ao	AN6626.1	62.m03217	AO070315000108	0					-52	-35	ATGCTCACCACCTCCTGA			ATGCTCACCACCTCCTGA	MLTTS*			MLTTS*	AAAATACATA	ACATCATCAT	1	R	0	0	0	0	0
2620	1675	ao	AN3308.1	52.m03702	AO070330000181	0					-52	-29	ATGAACTGGGGTTACACGAGTTAA			ATGAACTGGGGTTACACGAGTTAA	MNWGYTS*			MNWGYTS*	TCATCACTCT	GGATCCACCG	1	G	0	0	0	0	0
2624	1679	an	AN1923.1	69.m14941	AO070341000112	1	-444	-415					ATGTGCGGACACCGCTGCGGCGGGCAGTGA	ATGTGCGGACACCGCTGCGGCGGGCAGTGA			MCGHRCGGQ*	MCGHRCGGQ*			ATCGCAACCC	CTTTCCAGCC	0	E	0	0	0	0	0
2625	1679	an	AN1923.1	69.m14941	AO070341000112	1	-399	-337					ATGCTCGGCTCGCGCGACAGAGCCAGATTTATCAGTCTCGTTCGTTCTCTCGAGCAGCGTTAG	ATGCTCGGCTCGCGCGACAGAGCCAGATTTATCAGTCTCGTTCGTTCTCTCGAGCAGCGTTAG			MLGSRDRARFISLVRSLEQR*	MLGSRDRARFISLVRSLEQR*			CAGCCGAATA	CCGCGGGAAG	0	E	0	0	0	0	0
2639	1679	ao	AN1923.1	69.m14941	AO070341000112	1					-375	-292	ATGCTCACTTTCCCGGCCGAATGGTCCGTGGCATATCCCGCGGGCGTCTTCCAGCAGCACAAGGTTCCCCGCCGGGGCTTTTAG			ATGCTCACTTTCCCGGCCGAATGGTCCGTGGCATATCCCGCGGGCGTCTTCCAGCAGCACAAGGTTCCCCGCCGGGGCTTTTAG	MLTFPAEWSVAYPAGVFQQHKVPRRGF*			MLTFPAEWSVAYPAGVFQQHKVPRRGF*	CTCCGCTACG	GCCTTCTTCA	0	E	0	0	0	0	0
2646	1679	ao	AN1923.1	69.m14941	AO070341000112	1					-77	-30	ATGCTCCATCCGGGCGAGCGCTCGACTCCATCAAAGCAAGACAACTGA			ATGCTCCATCCGGGCGAGCGCTCGACTCCATCAAAGCAAGACAACTGA	MLHPGERSTPSKQDN*			MLHPGERSTPSKQDN*	TATCCAATGG	CCCCTCTCGA	0	E	0	0	0	0	0
2660	1685	af	AN8755.1	62.m03322	AO070250000017	0			-31	-11			ATGCTCATACCGGAAATCTAA		ATGCTCATACCGGAAATCTAA		MLIPEI*		MLIPEI*		TTTCCCCCTC	TTAGGACAAG	1	C	0	MG02616.1	0	0	0
2664	1688	an	AN2531.1	59.m08446	AO070300000119	0	-50	-18					ATGGGCGATTTCTCCAGATTATTGAATATTTGA	ATGGGCGATTTCTCCAGATTATTGAATATTTGA			MGDFSRLLNI*	MGDFSRLLNI*			CATTCGTCCA	AAATTCATAC	1	R	0	MG07444.1	0	0	0
2674	1695	af	AN6009.1	72.m19134	AO070340000270	1			-612	-595			ATGTCAGCGCGATCTTGA		ATGTCAGCGCGATCTTGA		MSARS*		MSARS*		CACTTCAACA	CGAACCATCA	0	R	0	0	0	0	0
2675	1695	ao	AN6009.1	72.m19134	AO070340000270	1					-875	-864	ATGTCACCTTAG			ATGTCACCTTAG	MSP*			MSP*	CTTTCCAACG	TCTAGCCTCG	0	R	0	0	0	0	0
2700	1704	ao	AN1087.1	52.m04007	AO070293000079	0					-57	-37	ATGGATCTTCACAAAGCCTAA			ATGGATCTTCACAAAGCCTAA	MDLHKA*			MDLHKA*	GTCACGACTG	GACTTCAACA	1	Q	0	0	0	0	0
2712	1723	an	AN4479.1	57.m05654	AO070311000025	0	-34	-20					ATGTCCGATTTTTAA	ATGTCCGATTTTTAA			MSDF*	MSDF*			CTACCTTGAC	CTGAGTATCC	1	T	0	0	0	0	0
2716	1723	af	AN4479.1	57.m05654	AO070311000025	0			-33	-16			ATGTCCCAAGTTAACTAA		ATGTCCCAAGTTAACTAA		MSQVN*		MSQVN*		GGCTATCCCT	TTTACAACAG	1	T	0	0	0	0	0
2718	1723	ao	AN4479.1	57.m05654	AO070311000025	0					-34	-20	ATGTCCCGTTTGTGA			ATGTCCCGTTTGTGA	MSRL*			MSRL*	AACACTACTT	TTGAGTCGTC	1	T	0	0	0	0	0
2719	1726	an	AN7741.1	71.m16099	AO070325000162	0	-55	-26					ATGTACATCTCCAGTCCCCTCACCCCCTAA	ATGTACATCTCCAGTCCCCTCACCCCCTAA			MYISSPLTP*	MYISSPLTP*			TCACGGCTGA	CCTTACCACC	1	U	0	MG05484.1	NCU09673.1	YOL062C	0
2722	1727	an	AN4014.1	54.m06948	AO070328000150	1	-33	-19					ATGATATCCTCCTAA	ATGATATCCTCCTAA			MISS*	MISS*			CCTCTTTAAC	TATCCTTCGC	1	UZ	0	0	0	0	0
2723	1727	af	AN4014.1	54.m06948	AO070328000150	1			-245	-222			ATGTTGTGCATGACAGTCCTCTAA		ATGTTGTGCATGACAGTCCTCTAA		MLCMTVL*		MLCMTVL*		AGGGTGGAGT	TTCTGGCGAG	0	UZ	0	0	0	0	0
2724	1727	af	AN4014.1	54.m06948	AO070328000150	1			-236	-222			ATGACAGTCCTCTAA		ATGACAGTCCTCTAA		MTVL*		MTVL*		TATGTTGTGC	TTCTGGCGAG	0	UZ	0	0	0	0	0
2725	1727	af	AN4014.1	54.m06948	AO070328000150	1			-200	-165			ATGCCTCTATGTCTACAAGCTGTCTTTCTTGAATAG		ATGCCTCTATGTCTACAAGCTGTCTTTCTTGAATAG		MPLCLQAVFLE*		MPLCLQAVFLE*		CGGCTGAGAT	CCTGAGTTGC	0	UZ	0	0	0	0	0
2726	1727	af	AN4014.1	54.m06948	AO070328000150	1			-192	-169			ATGTCTACAAGCTGTCTTTCTTGA		ATGTCTACAAGCTGTCTTTCTTGA		MSTSCLS*		MSTSCLS*		ATATGCCTCT	ATAGCCTGAG	0	UZ	0	0	0	0	0
2727	1727	af	AN4014.1	54.m06948	AO070328000150	1			-125	-93			ATGCCACCAGTGTGGAGAGCTTGCCAGGCATAG		ATGCCACCAGTGTGGAGAGCTTGCCAGGCATAG		MPPVWRACQA*		MPPVWRACQA*		ATTGCATTGC	ATCTATAAAC	0	UZ	0	0	0	0	0
2742	1728	ao	AN8078.1	53.m03931	AO070330000044	0					-57	-37	ATGAGATTTTCCCTTCGATAA			ATGAGATTTTCCCTTCGATAA	MRFSLR*			MRFSLR*	TTTAGCTGCA	CGACCATCTT	1	Q	0	0	0	0	0
2765	1740	an	AN5197.1	69.m14896	AO070237000027	0	-41	-21					ATGGTGAATCATTTTGTCTAG	ATGGTGAATCATTTTGTCTAG			MVNHFV*	MVNHFV*			AGTTGTAATA	TATTTCCACA	1	S	0	0	0	0	0
2767	1740	af	AN5197.1	69.m14896	AO070237000027	0			-58	-35			ATGATAATGATATCAACCACCTAA		ATGATAATGATATCAACCACCTAA		MIMISTT*		MIMISTT*		ATGACTAGTG	TCTCTGCAGC	1	S	0	0	0	0	0
2768	1740	af	AN5197.1	69.m14896	AO070237000027	0			-52	-35			ATGATATCAACCACCTAA		ATGATATCAACCACCTAA		MISTT*		MISTT*		AGTGATGATA	TCTCTGCAGC	1	S	0	0	0	0	0
2769	1740	ao	AN5197.1	69.m14896	AO070237000027	0					-55	-26	ATGAGAATGACCCAATTCAATAGCCCATAG			ATGAGAATGACCCAATTCAATAGCCCATAG	MRMTQFNSP*			MRMTQFNSP*	CACATTCACG	CTCTTTCGCC	1	S	0	0	0	0	0
2770	1740	ao	AN5197.1	69.m14896	AO070237000027	0					-49	-26	ATGACCCAATTCAATAGCCCATAG			ATGACCCAATTCAATAGCCCATAG	MTQFNSP*			MTQFNSP*	CACGATGAGA	CTCTTTCGCC	1	S	0	0	0	0	0
2811	1770	af	AN1292.1	70.m14916	AO070303000054	1			-70	-56			ATGTCAACAGAATAA		ATGTCAACAGAATAA		MSTE*		MSTE*		CTTGACTCAG	TTGCTTGCGT	0	I	0	0	0	0	0
2815	1772	ao	AN8707.1	62.m03362	AO070315000134	1					-43	-8	ATGAGTACAAAACTAAACAAAATCATCCTTGTCTAG			ATGAGTACAAAACTAAACAAAATCATCCTTGTCTAG	MSTKLNKIILV*			MSTKLNKIILV*	CATTGACCTA	CTCCATCATG	1	C	0	0	0	0	0
2817	1776	af	AN3010.1	59.m09008	AO070337000106	0			-60	-49			ATGTCCCAATAG		ATGTCCCAATAG		MSQ*		MSQ*		GTATTATCTT	GACATAGCTT	1	S	0	0	0	YOL093W	YOL093W
2846	1792	conserved	AN8723.1	62.m03343	AO070315000151	1	-93	-40	-93	-40	-93	-40	ATGAAmTysGGTCCrTysyvTCymymCrswTysAGAwCGryyGGyGCwTCyTAG	ATGAACTTCGGTCCGTCCTGTCCATCCACATTGAGATCGGCTGGTGCATCCTAG	ATGAAATCGGGTCCATTGTCTCTATACGGTTCCAGATCGATCGGCGCTTCTTAG	ATGAAATTCGGTCCGTCCCATCTCCACACATCGAGAACGACCGGCGCTTCCTAG	MnfGPscpstlRsaGAS*	MNFGPSCPSTLRSAGAS*	MKSGPLSLYGSRSIGAS*	MKFGPSHLHTSRTTGAS*	vvyhAsCATC	ACTybwGTCr	0		0	0	0	0	0
2850	1792	af	AN8723.1	62.m03343	AO070315000151	1			-538	-458			ATGTTCCTGTGCATGTCTGATAAGCTCCATCATCATCAATCAACTCAGATCAGATCGACCTCGCGCGCCTCGTCAGTGTAA		ATGTTCCTGTGCATGTCTGATAAGCTCCATCATCATCAATCAACTCAGATCAGATCGACCTCGCGCGCCTCGTCAGTGTAA		MFLCMSDKLHHHQSTQIRSTSRASSV*		MFLCMSDKLHHHQSTQIRSTSRASSV*		AAGATTCGAC	CCTGACAGGC	0		0	0	0	0	0
2851	1792	af	AN8723.1	62.m03343	AO070315000151	1			-526	-458			ATGTCTGATAAGCTCCATCATCATCAATCAACTCAGATCAGATCGACCTCGCGCGCCTCGTCAGTGTAA		ATGTCTGATAAGCTCCATCATCATCAATCAACTCAGATCAGATCGACCTCGCGCGCCTCGTCAGTGTAA		MSDKLHHHQSTQIRSTSRASSV*		MSDKLHHHQSTQIRSTSRASSV*		GTTCCTGTGC	CCTGACAGGC	0		0	0	0	0	0
2854	1797	af	AN6577.1	62.m03163	AO070326000023	0			-60	-16			ATGGCAATAATGCAGTTTCACTGTTCTGGTGTAGAGTCGTCCTGA		ATGGCAATAATGCAGTTTCACTGTTCTGGTGTAGAGTCGTCCTGA		MAIMQFHCSGVESS*		MAIMQFHCSGVESS*		GTATTTTTCC	CTAAAAAGTA	1	J	0	0	0	0	0
2855	1797	af	AN6577.1	62.m03163	AO070326000023	0			-51	-16			ATGCAGTTTCACTGTTCTGGTGTAGAGTCGTCCTGA		ATGCAGTTTCACTGTTCTGGTGTAGAGTCGTCCTGA		MQFHCSGVESS*		MQFHCSGVESS*		CATGGCAATA	CTAAAAAGTA	1	J	0	0	0	0	0
2858	1809	af	AN7661.1	57.m05428	AO070268000032	0			-27	-7			ATGGTCCAAGACCAGCAGTGA		ATGGTCCAAGACCAGCAGTGA		MVQDQQ*		MVQDQQ*		AGTACATCTG	AACACGATGT	1	K	0	0	0	0	0
2901	1817	af	AN2723.1	70.m15716	AO070309000061	0			-60	-46			ATGCGCAAATTCTAA		ATGCGCAAATTCTAA		MRKF*		MRKF*		GATCAATGAA	GTGCAATCTT	1	E	0	0	0	0	0
2914	1821	af	AN8018.1	53.m04191	AO070322000067	0			-48	-34			ATGAGCCAAAATTGA		ATGAGCCAAAATTGA		MSQN*		MSQN*		CGCCATTGGG	TTTCAGCGCT	1	S	FG03429.1	MG03349.1	NCU09799.1	0	0
2916	1838	an	AN6186.1	72.m19284	AO070308000114	0	-56	-27					ATGCATGTTCTTCTATCCTTTTCCGATTAA	ATGCATGTTCTTCTATCCTTTTCCGATTAA			MHVLLSFSD*	MHVLLSFSD*			ACACCTTCAA	TTACCTTTAT	1	L	FG05269.1	MG01699.1	0	0	0
2923	1844	conserved	AN4864.1	59.m09108	AO070329000150	0	-30	-16	-27	-13	-35	-21	ATGGrwsACmvbTrA	ATGGAAGACCACTGA	ATGGGAGACAGGTGA	ATGGGTCACCCTTAA	Medh*	MEDH*	MGDR*	MGHP*	TwyksrGyCA	whvydhyhhv	1	GE	0	MG09310.1	0	YOR002W	0
2927	1846	an	AN5748.1	69.m14846	AO070341000005	1	-173	-162					ATGCCGGCTTAA	ATGCCGGCTTAA			MPA*	MPA*			GGATCTATCC	GCTGCAGTTA	0	G	0	0	0	YJR131W	0
2928	1846	an	AN5748.1	69.m14846	AO070341000005	1	-82	-68					ATGACTACCGCCTAG	ATGACTACCGCCTAG			MTTA*	MTTA*			GTTATCATCT	CTGGAGCATC	0	G	0	0	0	YJR131W	0
2930	1846	af	AN5748.1	69.m14846	AO070341000005	1			-258	-175			ATGTTTGTTTGTGTCTGCGGGACGGAGAATTTAGCGAGCTCAATCACCAAGCTCAAGACTGGTGTCGAATTCCAAGGTTGCTAA		ATGTTTGTTTGTGTCTGCGGGACGGAGAATTTAGCGAGCTCAATCACCAAGCTCAAGACTGGTGTCGAATTCCAAGGTTGCTAA		MFVCVCGTENLASSITKLKTGVEFQGC*		MFVCVCGTENLASSITKLKTGVEFQGC*		GTACATTGAT	CGTTTCGTCT	0	G	0	0	0	YJR131W	0
2931	1846	af	AN5748.1	69.m14846	AO070341000005	1			-100	-86			ATGCGATCCCATTGA		ATGCGATCCCATTGA		MRSH*		MRSH*		TCGCGCATCT	TTTCTCTTCG	0	G	0	0	0	YJR131W	0
2932	1846	ao	AN5748.1	69.m14846	AO070341000005	1					-508	-488	ATGAATCCCCCATTGCAATAA			ATGAATCCCCCATTGCAATAA	MNPPLQ*			MNPPLQ*	AAATCCCAGA	TTGTCTAACC	0	G	0	0	0	YJR131W	0
2936	1846	ao	AN5748.1	69.m14846	AO070341000005	1					-278	-174	ATGGTTGTAAGCAATATTTCTAACGTTTCCTCCCCCATCTATGTAGGAATTATTCTCCCGTCACCAATTTGCCCTATAGATAGTTGTACCTTGTTCAAGAGTTGA			ATGGTTGTAAGCAATATTTCTAACGTTTCCTCCCCCATCTATGTAGGAATTATTCTCCCGTCACCAATTTGCCCTATAGATAGTTGTACCTTGTTCAAGAGTTGA	MVVSNISNVSSPIYVGIILPSPICPIDSCTLFKS*			MVVSNISNVSSPIYVGIILPSPICPIDSCTLFKS*	TATGTGAACC	CACCGATCGG	0	G	0	0	0	YJR131W	0
2937	1846	ao	AN5748.1	69.m14846	AO070341000005	1					-103	-71	ATGCCGATTGACTGTTCACTTTCTTCGCTATAG			ATGCCGATTGACTGTTCACTTTCTTCGCTATAG	MPIDCSLSSL*			MPIDCSLSSL*	GCTAGCGCCT	CGAGTGGGTT	0	G	0	0	0	YJR131W	0
2958	1857	af	AN0998.1	70.m15216	AO070312000041	1			-82	-35			ATGAGCGACATACCTAGTACAGTTCGACTTTTGGCTGGATACCGTTAG		ATGAGCGACATACCTAGTACAGTTCGACTTTTGGCTGGATACCGTTAG		MSDIPSTVRLLAGYR*		MSDIPSTVRLLAGYR*		CTACCTGAGG	GTGTTGAGCT	0		0	0	0	0	0
2964	1858	an	AN8706.1	62.m03363	AO070315000133	1	-125	-96					ATGGTGACATTGTTCACATACTTAGTCTGA	ATGGTGACATTGTTCACATACTTAGTCTGA			MVTLFTYLV*	MVTLFTYLV*			ACGACTCCGT	AACTCAATCT	0	M	0	0	0	0	0
2965	1863	an	AN5048.1	59.m08678	AO070338000188	1	-112	-74					ATGGTGCCAGTGTTTTTTCTCGCATTCTCTTCTTTTTAG	ATGGTGCCAGTGTTTTTTCTCGCATTCTCTTCTTTTTAG			MVPVFFLAFSSF*	MVPVFFLAFSSF*			CTTCCACGCA	CTCTAATTGT	0	R	0	0	0	0	0
2966	1863	an	AN5048.1	59.m08678	AO070338000188	1	-42	-13					ATGCTGCCGTTCCGTGTCGACTCTACATAA	ATGCTGCCGTTCCGTGTCGACTCTACATAA			MLPFRVDST*	MLPFRVDST*			CTTCGTCCTT	CCACCACCCA	1	R	0	0	0	0	0
2968	1863	af	AN5048.1	59.m08678	AO070338000188	1			-124	-110			ATGTCAATGTTCTGA		ATGTCAATGTTCTGA		MSMF*		MSMF*		ATTCTCCTCC	TCCTTTTTAT	0	R	0	0	0	0	0
2969	1863	af	AN5048.1	59.m08678	AO070338000188	1			-48	-31			ATGTCACACCGATCTTGA		ATGTCACACCGATCTTGA		MSHRS*		MSHRS*		CAATTCCCCC	ATCCTATCGA	1	R	0	0	0	0	0
2971	1863	ao	AN5048.1	59.m08678	AO070338000188	1					-30	-16	ATGCTTTTATCCTAA			ATGCTTTTATCCTAA	MLLS*			MLLS*	TCTAGCCCTC	CCTATCAACT	1	R	0	0	0	0	0
2987	1871	ao	AN6290.1	72.m19345	AO070308000002	0					-24	-13	ATGATTATTTGA			ATGATTATTTGA	MII*			MII*	TCGCTCCTCT	AGAGACTTAG	1		0	0	0	0	0
2989	1874	ao	AN0874.1	70.m15477	AO070320000033	0					-31	-14	ATGATCCTGTACCTTTAA			ATGATCCTGTACCTTTAA	MILYL*			MILYL*	TAAGCACCGC	CTAGACAGTC	1	A	0	MG06313.1	0	0	0
3012	1889	af	AN6438.1	58.m07697	AO070299000087	0			-38	-12			ATGCAAGTACCTCGCTGTGGCTGCTAG		ATGCAAGTACCTCGCTGTGGCTGCTAG		MQVPRCGC*		MQVPRCGC*		CAGGGAGGCG	CCGCAGTCAA	1	O	0	0	NCU02515.1	0	0
3046	1907	conserved	AN4597.1	57.m05519	AO070267000013	0	-38		-38		-38		ATGmGryhyyyybwwdCvdryydyAbyhyhmydhymTAA	ATGCGATACCTTCTATCATACTTTAGTCTACCTCTCTAA	ATGAGGCTTTCTGATACCAGTTGCATTTTTACGACATAA	ATGAGGCCCTCCTTTGCGGACCATACCACCATATCATAA	MRyllsyfslpl*	MRYLLSYFSLPL*	MRLSDTSCIFTT*	MRPSFADHTTIS*	mhyyGsCTTs	TGwCrTCwwy	1	BD	0	0	0	0	0
3106	1928	an	AN1487.1	55.m02993	AO070334000194	1	-288	-262					ATGCTTCTGTCTGTTCGCAGGGGTTAA	ATGCTTCTGTCTGTTCGCAGGGGTTAA			MLLSVRRG*	MLLSVRRG*			ACAGCTTCAT	CAATGCGATT	0		0	0	0	0	0
3107	1928	an	AN1487.1	55.m02993	AO070334000194	1	-259	-248					ATGCGATTCTAA	ATGCGATTCTAA			MRF*	MRF*			GGGGTTAACA	TGCATGCCTC	0		0	0	0	0	0
3108	1928	an	AN1487.1	55.m02993	AO070334000194	1	-248	-225					ATGCATGCCTCTCGCTCCGTTTAA	ATGCATGCCTCTCGCTCCGTTTAA			MHASRSV*	MHASRSV*			TGCGATTCTA	CTTGCTGGTA	0		0	0	0	0	0
3124	1939	af	AN4230.1	54.m06786	AO070234000016	0			-55	-41			ATGCACATCGGCTAA		ATGCACATCGGCTAA		MHIG*		MHIG*		ACTGTCATAC	GCCTTGAAAG	1	I	0	MG09516.1	0	0	0
3128	1939	ao	AN4230.1	54.m06786	AO070234000016	0					-24	-7	ATGTACCGCTTCAAGTGA			ATGTACCGCTTCAAGTGA	MYRFK*			MYRFK*	TGGAAACCAC	AGGACAATGA	1	I	0	MG09516.1	0	0	0
3142	1951	an	AN0868.1	70.m15459	AO070320000019	0	-48	-37					ATGCCATACTAG	ATGCCATACTAG			MPY*	MPY*			AACTCACTTG	CCCTTGCGAC	1	I	0	MG02999.1	NCU00580.1	0	0
3165	1961	an	AN3927.1	69.m15001	AO070341000039	0	-60	-16					ATGGATGGGGAGCTTTATCTCATCTCCACACTCAATTCTCTATGA	ATGGATGGGGAGCTTTATCTCATCTCCACACTCAATTCTCTATGA			MDGELYLISTLNSL*	MDGELYLISTLNSL*			TTACTATTAC	TGTAGACTCC	1	T	0	0	0	0	0
3170	1961	af	AN3927.1	69.m15001	AO070341000039	0			-49	-17			ATGCGTTTCTTACGGCTCTCGTCGATCATTTGA		ATGCGTTTCTTACGGCTCTCGTCGATCATTTGA		MRFLRLSSII*		MRFLRLSSII*		CAATCTGAGA	TATACTGACA	1	T	0	0	0	0	0
3198	1965	an	AN9405.1	52.m04032	AO070274000012	1	-58	-44					ATGATTTCATCCTAA	ATGATTTCATCCTAA			MISS*	MISS*			AAAAATTGCA	CATACTGTCT	1		0	0	0	0	0
3202	1965	af	AN9405.1	52.m04032	AO070274000012	1			-102	-82			ATGATGATGACGATGCGATGA		ATGATGATGACGATGCGATGA		MMMTMR*		MMMTMR*		AGGCTTGATC	ACTTATGAGT	0		0	0	0	0	0
3203	1965	af	AN9405.1	52.m04032	AO070274000012	1			-99	-82			ATGATGACGATGCGATGA		ATGATGACGATGCGATGA		MMTMR*		MMTMR*		CTTGATCATG	ACTTATGAGT	0		0	0	0	0	0
3204	1965	af	AN9405.1	52.m04032	AO070274000012	1			-96	-82			ATGACGATGCGATGA		ATGACGATGCGATGA		MTMR*		MTMR*		GATCATGATG	ACTTATGAGT	0		0	0	0	0	0
3205	1965	af	AN9405.1	52.m04032	AO070274000012	1			-85	-74			ATGAACTTATGA		ATGAACTTATGA		MNL*		MNL*		TGACGATGCG	GTCGTTTAAT	0		0	0	0	0	0
3206	1965	af	AN9405.1	52.m04032	AO070274000012	1			-77	-30			ATGAGTCGTTTAATATTCATTGCAATTATTCATCTGACTCGGTTTTAG		ATGAGTCGTTTAATATTCATTGCAATTATTCATCTGACTCGGTTTTAG		MSRLIFIAIIHLTRF*		MSRLIFIAIIHLTRF*		CGATGAACTT	CTAGAGATAT	0		0	0	0	0	0
3213	1966	an	AN8796.1	71.m15603	AO070276000064	1	-123	-91					ATGTCAATGGAAACCAGGAGCATCGGATGCTGA	ATGTCAATGGAAACCAGGAGCATCGGATGCTGA			MSMETRSIGC*	MSMETRSIGC*			TGACTTCTCA	ACTTACCCCC	0	T	FG05865.1	0	NCU01099.1	YML121W	0
3214	1966	an	AN8796.1	71.m15603	AO070276000064	1	-117	-91					ATGGAAACCAGGAGCATCGGATGCTGA	ATGGAAACCAGGAGCATCGGATGCTGA			METRSIGC*	METRSIGC*			CTCAATGTCA	ACTTACCCCC	0	T	FG05865.1	0	NCU01099.1	YML121W	0
3215	1966	an	AN8796.1	71.m15603	AO070276000064	1	-97	-11					ATGCTGAACTTACCCCCTGCGAGAGCTGTTTCTCCCTTCGATGGCAGCTGCGGGGTACCGGTTGAACTAAGCAGCATCTCCAATTGA	ATGCTGAACTTACCCCCTGCGAGAGCTGTTTCTCCCTTCGATGGCAGCTGCGGGGTACCGGTTGAACTAAGCAGCATCTCCAATTGA			MLNLPPARAVSPFDGSCGVPVELSSISN*	MLNLPPARAVSPFDGSCGVPVELSSISN*			GGAGCATCGG	GTGAGCAACG	0	T	FG05865.1	0	NCU01099.1	YML121W	0
3216	1966	an	AN8796.1	71.m15603	AO070276000064	1	-57	-28					ATGGCAGCTGCGGGGTACCGGTTGAACTAA	ATGGCAGCTGCGGGGTACCGGTTGAACTAA			MAAAGYRLN*	MAAAGYRLN*			TCTCCCTTCG	GCAGCATCTC	1	T	FG05865.1	0	NCU01099.1	YML121W	0
3219	1966	af	AN8796.1	71.m15603	AO070276000064	1			-143	-102			ATGTATATGAGGAGCCTACAGAACCCGCACCTCACACGATAG		ATGTATATGAGGAGCCTACAGAACCCGCACCTCACACGATAG		MYMRSLQNPHLTR*		MYMRSLQNPHLTR*		AGTTGCACAT	CGCTGCAGGT	0	T	FG05865.1	0	NCU01099.1	YML121W	0
3220	1966	af	AN8796.1	71.m15603	AO070276000064	1			-137	-102			ATGAGGAGCCTACAGAACCCGCACCTCACACGATAG		ATGAGGAGCCTACAGAACCCGCACCTCACACGATAG		MRSLQNPHLTR*		MRSLQNPHLTR*		ACATATGTAT	CGCTGCAGGT	0	T	FG05865.1	0	NCU01099.1	YML121W	0
3223	1966	ao	AN8796.1	71.m15603	AO070276000064	1					-113	-72	ATGTCCGGAACCAGTCCACCACGCCCCCCTCTCCCCCATTGA			ATGTCCGGAACCAGTCCACCACGCCCCCCTCTCCCCCATTGA	MSGTSPPRPPLPH*			MSGTSPPRPPLPH*	AACTCAACCG	ACTAAAAGAA	0	T	FG05865.1	0	NCU01099.1	YML121W	0
3234	1973	an	AN0954.1	70.m15601	AO070320000155	0	-17						ATGCCAATCTACTCATGA	ATGCCAATCTACTCATGA			MPIYS*	MPIYS*			AACATCTCAG	TGTCTGAAGT	1	R	0	0	0	0	0
3235	1973	af	AN0954.1	70.m15601	AO070320000155	1			-198	-157			ATGAATTCAAATTATATACCAGTTGCACGTCGCGCTCCATAA		ATGAATTCAAATTATATACCAGTTGCACGTCGCGCTCCATAA		MNSNYIPVARRAP*		MNSNYIPVARRAP*		GCAGCTCTGA	TTGTGAAACC	0	R	0	0	0	0	0
3236	1973	af	AN0954.1	70.m15601	AO070320000155	1			-36	-16			ATGCCATCCAGCATTATCTGA		ATGCCATCCAGCATTATCTGA		MPSSII*		MPSSII*		AACAAACCAA	ACAACAACCA	1	R	0	0	0	0	0
3237	1973	ao	AN0954.1	70.m15601	AO070320000155	1					-250	-236	ATGAACATAAGTTGA			ATGAACATAAGTTGA	MNIS*			MNIS*	TGAGTTCAAA	AACTCGAGAT	0	R	0	0	0	0	0
3238	1973	ao	AN0954.1	70.m15601	AO070320000155	1					-52	-41	ATGCCACCTTAA			ATGCCACCTTAA	MPP*			MPP*	TGCACTTTCC	CCAAACCAAA	1	R	0	0	0	0	0
3254	1980	an	AN3957.1	69.m14963	AO070341000077	1	-370	-260					ATGTATTATGATAACGCTACGAGCTTTCGTCGGTGCTCCAGGCTGATAGACTGTCTGATGCACTCAACTGATAAGATGGGTGTTCCCCACCACCCCGCCAGAGCCCGGTAA	ATGTATTATGATAACGCTACGAGCTTTCGTCGGTGCTCCAGGCTGATAGACTGTCTGATGCACTCAACTGATAAGATGGGTGTTCCCCACCACCCCGCCAGAGCCCGGTAA			MYYDNATSFRRCSRLIDCLMHSTDKMGVPHHPARAR*	MYYDNATSFRRCSRLIDCLMHSTDKMGVPHHPARAR*			TTCGAATAAT	ATAGTACAAA	0	JIT	0	0	0	0	0
3255	1980	an	AN3957.1	69.m14963	AO070341000077	1	-363	-325					ATGATAACGCTACGAGCTTTCGTCGGTGCTCCAGGCTGA	ATGATAACGCTACGAGCTTTCGTCGGTGCTCCAGGCTGA			MITLRAFVGAPG*	MITLRAFVGAPG*			AATATGTATT	TAGACTGTCT	0	JIT	0	0	0	0	0
3256	1980	an	AN3957.1	69.m14963	AO070341000077	1	-313	-260					ATGCACTCAACTGATAAGATGGGTGTTCCCCACCACCCCGCCAGAGCCCGGTAA	ATGCACTCAACTGATAAGATGGGTGTTCCCCACCACCCCGCCAGAGCCCGGTAA			MHSTDKMGVPHHPARAR*	MHSTDKMGVPHHPARAR*			AGACTGTCTG	ATAGTACAAA	0	JIT	0	0	0	0	0
3257	1980	an	AN3957.1	69.m14963	AO070341000077	1	-295	-260					ATGGGTGTTCCCCACCACCCCGCCAGAGCCCGGTAA	ATGGGTGTTCCCCACCACCCCGCCAGAGCCCGGTAA			MGVPHHPARAR*	MGVPHHPARAR*			AACTGATAAG	ATAGTACAAA	0	JIT	0	0	0	0	0
3258	1980	an	AN3957.1	69.m14963	AO070341000077	1	-203	-165					ATGGACATGAACTTATCGACCTGCCGTTTTAAGGGCTAG	ATGGACATGAACTTATCGACCTGCCGTTTTAAGGGCTAG			MDMNLSTCRFKG*	MDMNLSTCRFKG*			GAGCTCTTCC	TTTCGTCCAA	0	JIT	0	0	0	0	0
3259	1980	an	AN3957.1	69.m14963	AO070341000077	1	-197	-165					ATGAACTTATCGACCTGCCGTTTTAAGGGCTAG	ATGAACTTATCGACCTGCCGTTTTAAGGGCTAG			MNLSTCRFKG*	MNLSTCRFKG*			TTCCATGGAC	TTTCGTCCAA	0	JIT	0	0	0	0	0
3260	1980	an	AN3957.1	69.m14963	AO070341000077	1	-145	-110					ATGTCTACCTATCGTAGTTTCCGATGGAGGGGTTGA	ATGTCTACCTATCGTAGTTTCCGATGGAGGGGTTGA			MSTYRSFRWRG*	MSTYRSFRWRG*			ATCTTCGCCG	GATCTTGATA	0	JIT	0	0	0	0	0
3261	1980	an	AN3957.1	69.m14963	AO070341000077	1	-122	-102					ATGGAGGGGTTGAGATCTTGA	ATGGAGGGGTTGAGATCTTGA			MEGLRS*	MEGLRS*			GTAGTTTCCG	TACGAGGAGT	0	JIT	0	0	0	0	0
3262	1980	an	AN3957.1	69.m14963	AO070341000077	1	-89	-27					ATGGGTATATATATATTGATACAGTTACCCCTCTCATGTCTTGAAGACAGGTCTAATGCCTGA	ATGGGTATATATATATTGATACAGTTACCCCTCTCATGTCTTGAAGACAGGTCTAATGCCTGA			MGIYILIQLPLSCLEDRSNA*	MGIYILIQLPLSCLEDRSNA*			CGAGGAGTCT	ACTTACATTA	0	JIT	0	0	0	0	0
3263	1980	af	AN3957.1	69.m14963	AO070341000077	1			-508	-446			ATGTTCATAGTGCCGATATCCATTGCGGGAAAAAGCAAGAGATTCGCCAGGCCTAGGTACTAG		ATGTTCATAGTGCCGATATCCATTGCGGGAAAAAGCAAGAGATTCGCCAGGCCTAGGTACTAG		MFIVPISIAGKSKRFARPRY*		MFIVPISIAGKSKRFARPRY*		TACCTTCTAA	CCAACCTACT	0	JIT	0	0	0	0	0
3264	1980	af	AN3957.1	69.m14963	AO070341000077	1			-411	-373			ATGCCGAATATGTACCATAGGACTCCAACTACTCCATAG		ATGCCGAATATGTACCATAGGACTCCAACTACTCCATAG		MPNMYHRTPTTP*		MPNMYHRTPTTP*		AGCTTCCCCA	GCTCACATCC	0	JIT	0	0	0	0	0
3265	1980	af	AN3957.1	69.m14963	AO070341000077	1			-402	-373			ATGTACCATAGGACTCCAACTACTCCATAG		ATGTACCATAGGACTCCAACTACTCCATAG		MYHRTPTTP*		MYHRTPTTP*		AATGCCGAAT	GCTCACATCC	0	JIT	0	0	0	0	0
3266	1980	af	AN3957.1	69.m14963	AO070341000077	1			-361	-326			ATGGTTCTCCAACTTTATATTTCTGTTGGAGAATAG		ATGGTTCTCCAACTTTATATTTCTGTTGGAGAATAG		MVLQLYISVGE*		MVLQLYISVGE*		CTCACATCCA	GTAGAATACG	0	JIT	0	0	0	0	0
3267	1980	af	AN3957.1	69.m14963	AO070341000077	1			-302	-285			ATGTTAGTGGACAGATAA		ATGTTAGTGGACAGATAA		MLVDR*		MLVDR*		TGCATCTCAG	CGCTGCCCCA	0	JIT	0	0	0	0	0
3268	1980	af	AN3957.1	69.m14963	AO070341000077	1			-183	-133			ATGTCTCTCGACCTGCCTAATCGGAAAAGATATGAGGTTCCTGACACCTAA		ATGTCTCTCGACCTGCCTAATCGGAAAAGATATGAGGTTCCTGACACCTAA		MSLDLPNRKRYEVPDT*		MSLDLPNRKRYEVPDT*		AGTCCAGGGC	GATAAGGAGA	0	JIT	0	0	0	0	0
3269	1980	af	AN3957.1	69.m14963	AO070341000077	1			-152	-120			ATGAGGTTCCTGACACCTAAGATAAGGAGATGA		ATGAGGTTCCTGACACCTAAGATAAGGAGATGA		MRFLTPKIRR*		MRFLTPKIRR*		CGGAAAAGAT	CCCCATTCTC	0	JIT	0	0	0	0	0
3270	1980	af	AN3957.1	69.m14963	AO070341000077	1			-123	-88			ATGACCCCATTCTCCAACTGCCTGCACCCGATTTAA		ATGACCCCATTCTCCAACTGCCTGCACCCGATTTAA		MTPFSNCLHPI*		MTPFSNCLHPI*		AGATAAGGAG	GGCAGCCGTT	0	JIT	0	0	0	0	0
3271	1980	ao	AN3957.1	69.m14963	AO070341000077	1					-318	-304	ATGTGTTTTGCGTAA			ATGTGTTTTGCGTAA	MCFA*			MCFA*	AAAGCGTGTG	CAGATAACTC	0	JIT	0	0	0	0	0
3272	1980	ao	AN3957.1	69.m14963	AO070341000077	1					-70	-11	ATGTGTTTCATAGCGCAACATCATATACCTCCTACCTTCCCCTTAGTTGATCCCCAATAG			ATGTGTTTCATAGCGCAACATCATATACCTCCTACCTTCCCCTTAGTTGATCCCCAATAG	MCFIAQHHIPPTFPLVDPQ*			MCFIAQHHIPPTFPLVDPQ*	GCTTCCTTTG	CTTACTGACT	0	JIT	0	0	0	0	0
3312	1999	ao	AN2748.1	54.m06683	AO070338000223	0					-45	-34	ATGAAACCATAG			ATGAAACCATAG	MKP*			MKP*	ATTGTCTTGG	GCTTGGGGGC	1	R	0	0	0	YPR186C	0
3323	2005	an	AN6512.1	62.m03099	AO070270000007	0	-52	-29					ATGACTTGGGCTGTTCCTAATTAA	ATGACTTGGGCTGTTCCTAATTAA			MTWAVPN*	MTWAVPN*			CTACTGATTT	ACTGAGTTCA	1	RK	FG07165.1	0	0	YFL028C	0
3330	2007	an	AN7483.1	57.m05865	AO070287000044	1	-83	-66					ATGACTTGCCATGCCTGA	ATGACTTGCCATGCCTGA			MTCHA*	MTCHA*			TATCTGTGCA	GGAATGGGTG	0		0	0	0	0	0
3331	2007	an	AN7483.1	57.m05865	AO070287000044	1	-73	-26					ATGCCTGAGGAATGGGTGCCCTTTTCATGCTGTTTTTTCCACCTTTGA	ATGCCTGAGGAATGGGTGCCCTTTTCATGCTGTTTTTTCCACCTTTGA			MPEEWVPFSCCFFHL*	MPEEWVPFSCCFFHL*			ATGACTTGCC	CTGTGACCAG	0		0	0	0	0	0
3335	2007	af	AN7483.1	57.m05865	AO070287000044	1			-45	-16			ATGTGTCGGCAAATCACTTCCAGCAGCTGA		ATGTGTCGGCAAATCACTTCCAGCAGCTGA		MCRQITSSS*		MCRQITSSS*		CATTCGAGGA	TGACGATTCT	1		0	0	0	0	0
3338	2007	ao	AN7483.1	57.m05865	AO070287000044	1					-33	-13	ATGTTTTCTTCATTCATGTGA			ATGTTTTCTTCATTCATGTGA	MFSSFM*			MFSSFM*	GGCTAGGCGG	CGATCATTCG	1		0	0	0	0	0
3356	2013	ao	AN6870.1	71.m15261	AO070314000052	0					-47	-30	ATGTACAGTACTGTTTAA			ATGTACAGTACTGTTTAA	MYSTV*			MYSTV*	ATTCTCTTGT	CTAGTTTACC	1	R	FG02207.1	MG10534.1	0	0	0
3357	2016	conserved	AN1779.1	69.m15647	AO070324000017	1	-177	-163	-188	-174	-129	-115	ATGrCbTyTyTsTrA	ATGGCCTTTCTCTGA	ATGACTTCTCTCTAA	ATGGCGTCTTTGTGA	MafL*	MAFL*	MTSL*	MASL*	mryryswACA	kykAmvvTyy	0	LD	0	0	0	0	0
3358	2017	an	AN2243.1	71.m15877	AO070326000130	1	-296	-285					ATGTCCTTCTAA	ATGTCCTTCTAA			MSF*	MSF*			ACGAAAGCCC	AACAACATCC	0	R	0	MG01743.1	0	0	0
3363	2017	af	AN2243.1	71.m15877	AO070326000130	1			-303	-292			ATGTCTTTTTAG		ATGTCTTTTTAG		MSF*		MSF*		TGATCGATTC	ACACCACACC	0	R	0	MG01743.1	0	0	0
3369	2017	ao	AN2243.1	71.m15877	AO070326000130	1					-337	-326	ATGTCGATCTAA			ATGTCGATCTAA	MSI*			MSI*	CATCTCGTCG	TCAACCCTTT	0	R	0	MG01743.1	0	0	0
3384	2032	conserved	AN8846.1	71.m15980	AO070271000030	1	-87	-64	-260	-237	-89	-66	ATGAyCmrybkbyGsTwydCdTrA	ATGATCCGTTGGCGCTTTGCATAA	ATGACCCACCTTCGGTACACTTGA	ATGATCAGTGTCTGGTACTCGTAA	Mirwrfa*	MIRWRFA*	MTHLRYT*	MISVWYS*	CmkywATymA	rwwyyysrAr	0	G	0	0	0	0	0
3385	2032	an	AN8846.1	71.m15980	AO070271000030	1	-318	-295					ATGCCATTCCAGCCAGTGCTTTAA	ATGCCATTCCAGCCAGTGCTTTAA			MPFQPVL*	MPFQPVL*			TTTCTATCGC	CTTCTCTTTC	0	G	0	0	0	0	0
3386	2032	an	AN8846.1	71.m15980	AO070271000030	1	-101	-84					ATGCCCTTTATCCAATGA	ATGCCCTTTATCCAATGA			MPFIQ*	MPFIQ*			CCCCTCTTGC	TCCGTTGGCG	0	G	0	0	0	0	0
3393	2034	an	AN3376.1	66.m04646	AO070281000020	1	-155	-108					ATGTACATTACTTCTCTATTGTGTACTAATACGCCAATTTGCTGCTAA	ATGTACATTACTTCTCTATTGTGTACTAATACGCCAATTTGCTGCTAA			MYITSLLCTNTPICC*	MYITSLLCTNTPICC*			AGAGAGCCTT	TTTTGCCTCC	0	I	0	0	0	0	0
3394	2034	ao	AN3376.1	66.m04646	AO070281000020	1					-103	-86	ATGACTATCTCCTTTTGA			ATGACTATCTCCTTTTGA	MTISF*			MTISF*	TATTTTCTGT	CACAGCGTAT	0	I	0	0	0	0	0
3401	2036	af	AN8767.1	52.m03894	AO070299000022	0			-31	-17			ATGAACAGACGATAA		ATGAACAGACGATAA		MNRR*		MNRR*		ATACTCACTT	CACTTCGTTT	1	M	0	0	0	0	0
3412	2040	ao	AN3233.1	58.m07220	AO070307000047	0					-48	-16	ATGTCCCCGGACTCATCTTCCTTCGCTACATGA			ATGTCCCCGGACTCATCTTCCTTCGCTACATGA	MSPDSSSFAT*			MSPDSSSFAT*	CTTCCCCGGA	AAACCCCTTG	1	R	0	0	0	0	0
3428	2045	an	AN0770.1	70.m15373	AO070316000074	0	-58	-44					ATGAACACCTGGTGA	ATGAACACCTGGTGA			MNTW*	MNTW*			TACCTGCTGA	CTCCAGTTCG	1	T	0	0	NCU01928.1	0	0
3430	2045	af	AN0770.1	70.m15373	AO070316000074	0			-23	-3			ATGGATCACGACTCTCATTAA		ATGGATCACGACTCTCATTAA		MDHDSH*		MDHDSH*		CTGTCGTTGT	CTATGTCCTC	1	T	0	0	NCU01928.1	0	0
3431	2045	ao	AN0770.1	70.m15373	AO070316000074	0					-23	-3	ATGGATCGAGCCATTGATTGA			ATGGATCGAGCCATTGATTGA	MDRAID*			MDRAID*	CCCAATTTGT	CAATGTCCTC	1	T	0	0	NCU01928.1	0	0
3432	2046	an	AN0766.1	70.m15369	AO070316000078	1	-336	-199					ATGACCCCCGCTTGTTTCTCGTCGTTTTGCAGGTCCCTCTCTGCCCGCCGCCTTCTGGCCGAATCTAAACCCGCATTGGAGCGTCCGGCTCCGCCATCGGTAGCACCTCCTCTGCCAGCGTTTCCTATTACTCAATAA	ATGACCCCCGCTTGTTTCTCGTCGTTTTGCAGGTCCCTCTCTGCCCGCCGCCTTCTGGCCGAATCTAAACCCGCATTGGAGCGTCCGGCTCCGCCATCGGTAGCACCTCCTCTGCCAGCGTTTCCTATTACTCAATAA			MTPACFSSFCRSLSARRLLAESKPALERPAPPSVAPPLPAFPITQ*	MTPACFSSFCRSLSARRLLAESKPALERPAPPSVAPPLPAFPITQ*			TCGCTATCCT	CCACCCGCCT	0		0	0	0	0	0
3433	2046	af	AN0766.1	70.m15369	AO070316000078	1			-209	-174			ATGCTCCGCCGTCACTCACCATCGATCGCCATTTGA		ATGCTCCGCCGTCACTCACCATCGATCGCCATTTGA		MLRRHSPSIAI*		MLRRHSPSIAI*		CTGGAGCCTT	CTTTTTTTTC	0		0	0	0	0	0
3437	2047	an	AN9511.1	69.m15659	AO070324000090	0	-25	-8					ATGTCTTGGTCACGCTAG	ATGTCTTGGTCACGCTAG			MSWSR*	MSWSR*			TACTTCACCC	AGCCACCATG	1	R	0	0	0	0	0
3441	2047	af	AN9511.1	69.m15659	AO070324000090	0			-58	-2			ATGGACGAGCATTGGAACATGGGACTTGACGCACTGTCGCTCATTTGGTCTACCTAA		ATGGACGAGCATTGGAACATGGGACTTGACGCACTGTCGCTCATTTGGTCTACCTAA		MDEHWNMGLDALSLIWST*		MDEHWNMGLDALSLIWST*		CCGTTTCATG	CATGGCGAGC	1	R	0	0	0	0	0
3442	2047	af	AN9511.1	69.m15659	AO070324000090	0			-40	-2			ATGGGACTTGACGCACTGTCGCTCATTTGGTCTACCTAA		ATGGGACTTGACGCACTGTCGCTCATTTGGTCTACCTAA		MGLDALSLIWST*		MGLDALSLIWST*		GCATTGGAAC	CATGGCGAGC	1	R	0	0	0	0	0
3499	2082	af	AN5742.1	69.m14840	AO070193000003	0			-59	-18			ATGAAGGATTCCTTTACAAGACACCATCAGGCCTGCCATTAA		ATGAAGGATTCCTTTACAAGACACCATCAGGCCTGCCATTAA		MKDSFTRHHQACH*		MKDSFTRHHQACH*		GCGTTTCTTT	CCTCCGCAAT	1	G	FG01593.1	0	0	0	0
3512	2083	af	AN1397.1	70.m14825	AO070233000013	0			-36	-25			ATGAGCAACTGA		ATGAGCAACTGA		MSN*		MSN*		AACATTGACC	ATTTCTGTTG	1	Q	0	0	0	0	0
3560	2107	af	AN6697.1	65.m07286	AO070339000128	1			-52	-26			ATGAATATAAGATTACCGACATTGTGA		ATGAATATAAGATTACCGACATTGTGA		MNIRLPTL*		MNIRLPTL*		GCTAATTGGC	GCGCAGTATT	1		FG01351.1	0	NCU02668.1	0	0
3575	2110	ao	AN2153.1	72.m19688	AO070343000202	0					-17		ATGCCAAGTAATGTGTAA			ATGCCAAGTAATGTGTAA	MPSNV*			MPSNV*	ATTTTATCGG	TGACTGACCG	1	J	0	MG07084.1	NCU08026.1	0	0
3578	2111	an	AN7437.1	57.m05908	AO070229000007	0	-53	-33					ATGTGTTCCAAACCCAAGTGA	ATGTGTTCCAAACCCAAGTGA			MCSKPK*	MCSKPK*			AGCGCCTCGA	TTACTATAAG	1	R	0	0	NCU07504.1	0	0
3587	2113	ao	AN6655.1	62.m03451	AO070269000011	0					-59	-30	ATGTCCCCGCCGAGGATAACTACTCACTGA			ATGTCCCCGCCGAGGATAACTACTCACTGA	MSPPRITTH*			MSPPRITTH*	CAGAAGTCCG	GAATCGCTTG	1	IQR	FG00177.1	0	0	0	0
3608	2121	an	AN0213.1	71.m15479	AO070323000085	1	-180	-166					ATGGAACTGGCCTAG	ATGGAACTGGCCTAG			MELA*	MELA*			CTCCTGACCC	GGTGCCGCCC	0		0	0	0	0	0
3609	2121	an	AN0213.1	71.m15479	AO070323000085	1	-83	-57					ATGATACCACGACGGAACGAATTTTGA	ATGATACCACGACGGAACGAATTTTGA			MIPRRNEF*	MIPRRNEF*			CATCGAGCTG	TTCCATCGAT	0		0	0	0	0	0
3610	2121	af	AN0213.1	71.m15479	AO070323000085	1			-393	-319			ATGACGGCCATCCCTCAGCTATTTGCCGTTTTCTATCCTGCCATACGATTTGCGGCCTTTCAGTTCCTACATTGA		ATGACGGCCATCCCTCAGCTATTTGCCGTTTTCTATCCTGCCATACGATTTGCGGCCTTTCAGTTCCTACATTGA		MTAIPQLFAVFYPAIRFAAFQFLH*		MTAIPQLFAVFYPAIRFAAFQFLH*		ACTTTGCTGC	GGACGATATT	0		0	0	0	0	0
3611	2121	af	AN0213.1	71.m15479	AO070323000085	1			-248	-117			ATGATCATTTTCTCCGCCTCATGGGAGGATCCTGAGGAACCAGCAGGTTCCGACCGCGGTCAACGGTACTCGCCACTAGTCTATCGAACCTCACGACTCACGACGGCACGATTATTTGAATACCATTTCTAA		ATGATCATTTTCTCCGCCTCATGGGAGGATCCTGAGGAACCAGCAGGTTCCGACCGCGGTCAACGGTACTCGCCACTAGTCTATCGAACCTCACGACTCACGACGGCACGATTATTTGAATACCATTTCTAA		MIIFSASWEDPEEPAGSDRGQRYSPLVYRTSRLTTARLFEYHF*		MIIFSASWEDPEEPAGSDRGQRYSPLVYRTSRLTTARLFEYHF*		TCACTGTTTG	ATAGGATTGG	0		0	0	0	0	0
3612	2121	af	AN0213.1	71.m15479	AO070323000085	1			-228	-214			ATGGGAGGATCCTGA		ATGGGAGGATCCTGA		MGGS*		MGGS*		TCTCCGCCTC	GGAACCAGCA	0		0	0	0	0	0
3613	2121	ao	AN0213.1	71.m15479	AO070323000085	1					-375	-364	ATGTTCTTTTAG			ATGTTCTTTTAG	MFF*			MFF*	CCTTTTCTTT	CTAGTCTCTC	0		0	0	0	0	0
3614	2121	ao	AN0213.1	71.m15479	AO070323000085	1					-235	-224	ATGGAACTGTAG			ATGGAACTGTAG	MEL*			MEL*	TCGTCATTCC	TGAGGACCCA	0		0	0	0	0	0
3632	2131	an	AN6711.1	65.m07264	AO070339000151	1	-75	-58					ATGACACTCATTTCTTGA	ATGACACTCATTTCTTGA			MTLIS*	MTLIS*			TTCCCTTGAG	CCGGCTCATT	0	FE	FG04261.1	0	NCU05254.1	0	0
3633	2131	an	AN6711.1	65.m07264	AO070339000151	1	-34	-17					ATGTCTATGATTCTTTGA	ATGTCTATGATTCTTTGA			MSMIL*	MSMIL*			TTTCAGCTTG	TCCGCTCGAT	1	FE	FG04261.1	0	NCU05254.1	0	0
3634	2131	an	AN6711.1	65.m07264	AO070339000151	1	-28	-17					ATGATTCTTTGA	ATGATTCTTTGA			MIL*	MIL*			CTTGATGTCT	TCCGCTCGAT	1	FE	FG04261.1	0	NCU05254.1	0	0
3635	2131	af	AN6711.1	65.m07264	AO070339000151	1			-90	-10			ATGCCCTTCACAACCCCTACCTCCTTTCTACTCTCCCCTCTCGTCTCCTCATTGTACATGCCTTCATTTCGCAGTACTTAA		ATGCCCTTCACAACCCCTACCTCCTTTCTACTCTCCCCTCTCGTCTCCTCATTGTACATGCCTTCATTTCGCAGTACTTAA		MPFTTPTSFLLSPLVSSLYMPSFRST*		MPFTTPTSFLLSPLVSSLYMPSFRST*		GCCATTTGAA	TAGGTCACAA	0	FE	FG04261.1	0	NCU05254.1	0	0
3636	2131	af	AN6711.1	65.m07264	AO070339000151	1			-33	-10			ATGCCTTCATTTCGCAGTACTTAA		ATGCCTTCATTTCGCAGTACTTAA		MPSFRST*		MPSFRST*		CTCATTGTAC	TAGGTCACAA	1	FE	FG04261.1	0	NCU05254.1	0	0
3637	2131	ao	AN6711.1	65.m07264	AO070339000151	1					-479	-459	ATGTCTTATTCTAGCACATAA			ATGTCTTATTCTAGCACATAA	MSYSST*			MSYSST*	TCCCTTGTCC	TTACACCAAA	0	FE	FG04261.1	0	NCU05254.1	0	0
3647	2138	af	AN5005.1	59.m08905	AO070255000035	0			-58	-29			ATGCTCCTACCTTACTATCCTATCTTTTAA		ATGCTCCTACCTTACTATCCTATCTTTTAA		MLLPYYPIF*		MLLPYYPIF*		TTAACCACAT	TCCCACCATT	1		0	0	0	0	0
3649	2138	ao	AN5005.1	59.m08905	AO070255000035	0					-59	-45	ATGTTCCTTCCATAA			ATGTTCCTTCCATAA	MFLP*			MFLP*	AATTGTCTAT	TCTATATCTC	1		0	0	0	0	0
3650	2143	an	AN8886.1	56.m03088	AO070293000018	1	-253	-173					ATGACAGCTGCCTCCGACCACTCCCTGCCCGAAACCTCCTTCACTCCGCATTGCGCTTATCGTTCCCCGGTTTCCCCTTAA	ATGACAGCTGCCTCCGACCACTCCCTGCCCGAAACCTCCTTCACTCCGCATTGCGCTTATCGTTCCCCGGTTTCCCCTTAA			MTAASDHSLPETSFTPHCAYRSPVSP*	MTAASDHSLPETSFTPHCAYRSPVSP*			CCATTGCAGC	GATATGGGAG	0	E	0	0	NCU04358.1	0	0
3651	2143	an	AN8886.1	56.m03088	AO070293000018	1	-169	-158					ATGGGAGTTTAG	ATGGGAGTTTAG			MGV*	MGV*			CCCTTAAGAT	GAGATGAATC	0	E	0	0	NCU04358.1	0	0
3652	2143	af	AN8886.1	56.m03088	AO070293000018	1			-362	-255			ATGTTTCTTACTGTACCCCATACCTCCTCATCCCTCGTCCTTCCAAATCTCCACGCGTGCCGCAGCTGTGCAGTTGTGAGACTTTTCTATTCGCAGCACGTTAACTGA		ATGTTTCTTACTGTACCCCATACCTCCTCATCCCTCGTCCTTCCAAATCTCCACGCGTGCCGCAGCTGTGCAGTTGTGAGACTTTTCTATTCGCAGCACGTTAACTGA		MFLTVPHTSSSLVLPNLHACRSCAVVRLFYSQHVN*		MFLTVPHTSSSLVLPNLHACRSCAVVRLFYSQHVN*		AATCACTAAT	GACTGAGAGA	0	E	0	0	NCU04358.1	0	0
3653	2143	af	AN8886.1	56.m03088	AO070293000018	1			-96	-64			ATGGCGCCTAAAAAAGAAAACAACTTTGGATAA		ATGGCGCCTAAAAAAGAAAACAACTTTGGATAA		MAPKKENNFG*		MAPKKENNFG*		TTATCGAGAG	ATTGGGACAA	0	E	0	0	NCU04358.1	0	0
3654	2143	ao	AN8886.1	56.m03088	AO070293000018	1					-267	-181	ATGCTCGCTGTGAATCGTTGCATCGTCTCAAGGCATATGCGCCCCGATTATCTACTACGTCCTTATCTCGTTATCAAGCTCGAGTAG			ATGCTCGCTGTGAATCGTTGCATCGTCTCAAGGCATATGCGCCCCGATTATCTACTACGTCCTTATCTCGTTATCAAGCTCGAGTAG	MLAVNRCIVSRHMRPDYLLRPYLVIKLE*			MLAVNRCIVSRHMRPDYLLRPYLVIKLE*	CAGTCACAGC	TGGATTCAGG	0	E	0	0	NCU04358.1	0	0
3655	2143	ao	AN8886.1	56.m03088	AO070293000018	1					-231	-181	ATGCGCCCCGATTATCTACTACGTCCTTATCTCGTTATCAAGCTCGAGTAG			ATGCGCCCCGATTATCTACTACGTCCTTATCTCGTTATCAAGCTCGAGTAG	MRPDYLLRPYLVIKLE*			MRPDYLLRPYLVIKLE*	CTCAAGGCAT	TGGATTCAGG	0	E	0	0	NCU04358.1	0	0
3656	2143	ao	AN8886.1	56.m03088	AO070293000018	1					-134	-108	ATGGTTCCACTTATGATTGTTCGCTGA			ATGGTTCCACTTATGATTGTTCGCTGA	MVPLMIVR*			MVPLMIVR*	CAGCTGAATC	AGATAGTGAG	0	E	0	0	NCU04358.1	0	0
3657	2143	ao	AN8886.1	56.m03088	AO070293000018	1					-122	-108	ATGATTGTTCGCTGA			ATGATTGTTCGCTGA	MIVR*			MIVR*	GGTTCCACTT	AGATAGTGAG	0	E	0	0	NCU04358.1	0	0
3681	2153	af	AN9526.1	59.m09117	AO070327000084	1			-171	-145			ATGTTTACTTATTCTGCCCCTATTTGA		ATGTTTACTTATTCTGCCCCTATTTGA		MFTYSAPI*		MFTYSAPI*		GACTCACTCG	CTAACGCCGC	0	U	0	0	0	0	0
3695	2156	ao	AN2830.1	71.m15507	AO070330000102	0					-52	-20	ATGGGGTGCAACGTTTTCCCTAACCGATCATAA			ATGGGGTGCAACGTTTTCCCTAACCGATCATAA	MGCNVFPNRS*			MGCNVFPNRS*	CCCCCTCCCC	CATAGCAGAA	1	I	0	0	0	0	0
3699	2157	af	AN6721.1	53.m03953	AO070335000072	0			-51	-34			ATGGCAACAGTAGATTGA		ATGGCAACAGTAGATTGA		MATVD*		MATVD*		TATATTATAT	TTCGCTGGAT	1	R	0	0	0	0	0
3764	2186	ao	AN2236.1	71.m15828	AO070326000140	0					-42	-28	ATGTGTGGCGCATAG			ATGTGTGGCGCATAG	MCGA*			MCGA*	CTCTTTCTTT	ACGGTAGGCG	1	S	0	0	0	0	0
3770	2191	ao	AN3793.1	57.m05691	AO070337000236	1					-505	-419	ATGTGGTGCATGATATCGACATCGCTAACCGTCGTATCGCAGAAGCTTACTTCGGGCGAATCGGAACTTTCCCTTCCGACCAACTAG			ATGTGGTGCATGATATCGACATCGCTAACCGTCGTATCGCAGAAGCTTACTTCGGGCGAATCGGAACTTTCCCTTCCGACCAACTAG	MWCMISTSLTVVSQKLTSGESELSLPTN*			MWCMISTSLTVVSQKLTSGESELSLPTN*	TGTTGGTCCC	TTCGCCGGTG	0	TR	0	0	0	0	0
3771	2191	ao	AN3793.1	57.m05691	AO070337000236	1					-496	-419	ATGATATCGACATCGCTAACCGTCGTATCGCAGAAGCTTACTTCGGGCGAATCGGAACTTTCCCTTCCGACCAACTAG			ATGATATCGACATCGCTAACCGTCGTATCGCAGAAGCTTACTTCGGGCGAATCGGAACTTTCCCTTCCGACCAACTAG	MISTSLTVVSQKLTSGESELSLPTN*			MISTSLTVVSQKLTSGESELSLPTN*	CATGTGGTGC	TTCGCCGGTG	0	TR	0	0	0	0	0
3775	2192	ao	AN5992.1	72.m19148	AO070340000285	1					-80	-69	ATGCGAGTCTAG			ATGCGAGTCTAG	MRV*			MRV*	CCCCCGATCG	TACTGTCGCC	0	L	0	0	0	0	0
3796	2204	an	AN6779.1	71.m15523	AO070292000024	0	-36	-7					ATGGTTCTTCTTTCTACGGACAGCAGCTGA	ATGGTTCTTCTTTCTACGGACAGCAGCTGA			MVLLSTDSS*	MVLLSTDSS*			TGCCAGCGTT	TTGACAATGT	1	Q	0	0	0	0	0
3814	2215	af	AN4763.1	59.m09489	AO070327000053	0			-54	-31			ATGATCAATCGGCGTTCCTGCTAA		ATGATCAATCGGCGTTCCTGCTAA		MINRRSC*		MINRRSC*		AAACTATGCC	GTAGAGATTC	1	R	0	0	0	0	0
3824	2218	an	AN9144.1	66.m04609	AO070332000114	0	-55	-26					ATGCGCCATAGTAGATTTGACAAGTTTTGA	ATGCGCCATAGTAGATTTGACAAGTTTTGA			MRHSRFDKF*	MRHSRFDKF*			TACCCCTGCA	GAATTTACGC	1	E	0	0	0	0	0
3827	2218	af	AN9144.1	66.m04609	AO070332000114	0			-58	-41			ATGCTTATAGCATTCTAG		ATGCTTATAGCATTCTAG		MLIAF*		MLIAF*		CTCGCTTGCG	TATCATCCCG	1	E	0	0	0	0	0
3828	2218	ao	AN9144.1	66.m04609	AO070332000114	0					-49	-38	ATGCTTCTATAG			ATGCTTCTATAG	MLL*			MLL*	CGAACTTGCT	TAAACTATAC	1	E	0	0	0	0	0
3832	2222	af	AN1555.1	55.m03072	AO070339000298	0			-59	-30			ATGTTGATGGATACCGGCCAGGGTCACTGA		ATGTTGATGGATACCGGCCAGGGTCACTGA		MLMDTGQGH*		MLMDTGQGH*		GTTCTGTCAG	CAATGTCTTT	1	M	0	0	0	0	0
3833	2222	af	AN1555.1	55.m03072	AO070339000298	0			-53	-30			ATGGATACCGGCCAGGGTCACTGA		ATGGATACCGGCCAGGGTCACTGA		MDTGQGH*		MDTGQGH*		TCAGATGTTG	CAATGTCTTT	1	M	0	0	0	0	0
3834	2222	af	AN1555.1	55.m03072	AO070339000298	0			-27	-16			ATGTCTTTCTGA		ATGTCTTTCTGA		MSF*		MSF*		GTCACTGACA	ATCCATAGAA	1	M	0	0	0	0	0
3838	2222	ao	AN1555.1	55.m03072	AO070339000298	0					-30	-16	ATGCTCACACTCTAG			ATGCTCACACTCTAG	MLTL*			MLTL*	GCATCTCGCC	TTCCTTAGAA	1	M	0	0	0	0	0
3852	2228	an	AN5657.1	58.m07322	AO070342000247	0	-35	-18					ATGCTTGTCTATCTTTGA	ATGCTTGTCTATCTTTGA			MLVYL*	MLVYL*			TCAGGGCTCT	ACTATTTTAC	1		0	0	0	0	0
3864	2229	af	AN4111.1	52.m03714	AO070342000382	0			-22	-5			ATGCTCATCAAAGACTAG		ATGCTCATCAAAGACTAG		MLIKD*		MLIKD*		CAAGGTTGTT	CACCATGGCT	1	Q	0	0	0	0	0
3957	2274	af	AN3220.1	67.m02928	AO070330000070	1			-117	-103			ATGCACGGGGTATAA		ATGCACGGGGTATAA		MHGV*		MHGV*		CGCAGTGTTC	AGCTGGGAAG	0	GEPR	FG10483.1	MG05600.1	0	0	0
3990	2291	an	AN5333.1	69.m15580	AO070290000026	0	-39	-25					ATGAAACCCAGGTGA	ATGAAACCCAGGTGA			MKPR*	MKPR*			GACATAGGCC	ATCGCAAAAA	1		0	0	0	0	0
4001	2294	an	AN8726.1	66.m04723	AO070300000100	0	-36	-16					ATGTTTCGTGGCCTTATGTAA	ATGTTTCGTGGCCTTATGTAA			MFRGLM*	MFRGLM*			TCTTCCTTTC	TTGATCGTTG	1	E	0	0	0	0	0
4002	2300	an	AN8689.1	62.m03383	AO070315000110	1	-311	-261					ATGAAATTATCTCGGCCTTGCTTCATTTTACCTCTTTATGAATTATTATAA	ATGAAATTATCTCGGCCTTGCTTCATTTTACCTCTTTATGAATTATTATAA			MKLSRPCFILPLYELL*	MKLSRPCFILPLYELL*			CTCCGTGTCG	TCGTCCGTTC	0	G	0	0	0	0	0
4005	2300	ao	AN8689.1	62.m03383	AO070315000110	1					-234	-190	ATGCGCCCTCAATATTATCGCTTGGATACCATGCAACCTATATAA			ATGCGCCCTCAATATTATCGCTTGGATACCATGCAACCTATATAA	MRPQYYRLDTMQPI*			MRPQYYRLDTMQPI*	TTCCCTACGT	TTCCAAGAAA	0	G	0	0	0	0	0
4006	2300	ao	AN8689.1	62.m03383	AO070315000110	1					-204	-190	ATGCAACCTATATAA			ATGCAACCTATATAA	MQPI*			MQPI*	CTTGGATACC	TTCCAAGAAA	0	G	0	0	0	0	0
4038	2310	an	AN1176.1	70.m15041	AO070331000171	1	-39	-7					ATGCTCTCTCTCCTATGTTCTTGTCCCTCCTAG	ATGCTCTCTCTCCTATGTTCTTGTCCCTCCTAG			MLSLLCSCPS*	MLSLLCSCPS*			TTTAAATCCT	GAAAAAATGG	1	IT	0	0	0	0	0
4039	2310	af	AN1176.1	70.m15041	AO070331000171	1			-169	-146			ATGAAGTACCTATGTCAAAGCTGA		ATGAAGTACCTATGTCAAAGCTGA		MKYLCQS*		MKYLCQS*		CTAAGAAATA	CTCTACCTCA	0	IT	0	0	0	0	0
4040	2310	af	AN1176.1	70.m15041	AO070331000171	1			-158	-87			ATGTCAAAGCTGACTCTACCTCAATCTCGAACATCCTACAAGGAGTTCTTGCCTTTTTCATTCTTATATTGA		ATGTCAAAGCTGACTCTACCTCAATCTCGAACATCCTACAAGGAGTTCTTGCCTTTTTCATTCTTATATTGA		MSKLTLPQSRTSYKEFLPFSFLY*		MSKLTLPQSRTSYKEFLPFSFLY*		TGAAGTACCT	CTATCATTAT	0	IT	0	0	0	0	0
4041	2310	ao	AN1176.1	70.m15041	AO070331000171	1					-247	-215	ATGAAACCAAGTCAGCCAATTCTTTTTTATTAA			ATGAAACCAAGTCAGCCAATTCTTTTTTATTAA	MKPSQPILFY*			MKPSQPILFY*	CAACATTTAA	TTTTTCGACA	0	IT	0	0	0	0	0
4042	2310	ao	AN1176.1	70.m15041	AO070331000171	1					-201	-175	ATGATCATCTATTTAGCCTTTTCCTGA			ATGATCATCTATTTAGCCTTTTCCTGA	MIIYLAFS*			MIIYLAFS*	TTCGACATTT	ACCTCCGCCC	0	IT	0	0	0	0	0
4045	2311	an	AN1198.1	70.m15021	AO070331000203	0	-20						ATGCTACGAATTAACCCATAA	ATGCTACGAATTAACCCATAA			MLRINP*	MLRINP*			TTTTTTTCAT	TGTCTGCTTT	1	E	0	MG04826.1	NCU02727.1	0	0
4054	2314	an	AN0247.1	54.m06700	AO070338000240	0	-60	-4					ATGCAGAGACTTCGCGTGCAGTATCTTCTAGAGTTCAGAGATCTAGCGGTTGCATGA	ATGCAGAGACTTCGCGTGCAGTATCTTCTAGAGTTCAGAGATCTAGCGGTTGCATGA			MQRLRVQYLLEFRDLAVA*	MQRLRVQYLLEFRDLAVA*			TTTTTTTTTA	AAGATGCCTC	1	R	FG00732.1	0	0	0	0
4071	2318	ao	AN8968.1	70.m15193	AO070342000435	0					-33	-22	ATGCATGTATGA			ATGCATGTATGA	MHV*			MHV*	AAGCATCTAC	TCTCAAGAAA	1		0	0	0	0	0
4072	2318	ao	AN8968.1	70.m15193	AO070342000435	0					-25	-5	ATGATCTCAAGAAACAGATGA			ATGATCTCAAGAAACAGATGA	MISRNR*			MISRNR*	ACATGCATGT	CAAAATGGCT	1		0	0	0	0	0
4111	2326	an	AN3363.1	66.m04629	AO070281000032	0	-48	-22					ATGTCCAATTATTGTTTCTGTACCTAA	ATGTCCAATTATTGTTTCTGTACCTAA			MSNYCFCT*	MSNYCFCT*			GTTTGGTCTT	TTCCTACCGT	1	Z	FG00697.1	0	0	0	0
4120	2333	an	AN6890.1	71.m15249	AO070314000031	0	-52	-38					ATGACGACTGGATGA	ATGACGACTGGATGA			MTTG*	MTTG*			ATTGACTTGC	AGACAGAAGT	1	R	0	0	0	0	0
4122	2333	af	AN6890.1	71.m15249	AO070314000031	0			-56	-18			ATGATCGGACGAATACAACACTCGCACTGCTATTGCTGA		ATGATCGGACGAATACAACACTCGCACTGCTATTGCTGA		MIGRIQHSHCYC*		MIGRIQHSHCYC*		GCTCACTAGA	GTCCTTAACC	1	R	0	0	0	0	0
4127	2333	ao	AN6890.1	71.m15249	AO070314000031	0					-38	-18	ATGACTGCGCACATCAACTAA			ATGACTGCGCACATCAACTAA	MTAHIN*			MTAHIN*	TGCACATATA	ACAATCAAGC	1	R	0	0	0	0	0
4154	2336	ao	AN0947.1	70.m15586	AO070320000146	0					-53		ATGCCGGAAACAGTTGGGCTTGCGTCGCCGTTTCGCCCCAATCCCTGCTCATGA			ATGCCGGAAACAGTTGGGCTTGCGTCGCCGTTTCGCCCCAATCCCTGCTCATGA	MPETVGLASPFRPNPCS*			MPETVGLASPFRPNPCS*	ATTTATTGAT	TGACTGGATT	1	H	0	0	0	0	0
4167	2345	an	AN6147.1	72.m19018	AO070340000055	0	-29	-15					ATGGGACTTCTGTGA	ATGGGACTTCTGTGA			MGLL*	MGLL*			GCTTGATTAC	TAAGCTATCT	1	B	0	0	0	0	0
4169	2345	ao	AN6147.1	72.m19018	AO070340000055	0					-29	-15	ATGGGAAATCTGTGA			ATGGGAAATCTGTGA	MGNL*			MGNL*	CAATCTTTAT	TCTCGCAGAT	1	B	0	0	0	0	0
4175	2347	ao	AN3590.1	58.m07390	AO070342000142	1					-459	-304	ATGAATGTGACTTGCTCTTTCCCTGACATCAATTCATTTAAATACCATCCCCTCATAACCTCTCACTACCCCAGTGGTTCCCTCAGATTATTATTACTCGCATCCTCCTCCTCAGCACTAACTGTGGCTAACCTCCATCCATTTTTTATTTCTTGA			ATGAATGTGACTTGCTCTTTCCCTGACATCAATTCATTTAAATACCATCCCCTCATAACCTCTCACTACCCCAGTGGTTCCCTCAGATTATTATTACTCGCATCCTCCTCCTCAGCACTAACTGTGGCTAACCTCCATCCATTTTTTATTTCTTGA	MNVTCSFPDINSFKYHPLITSHYPSGSLRLLLLASSSSALTVANLHPFFIS*			MNVTCSFPDINSFKYHPLITSHYPSGSLRLLLLASSSSALTVANLHPFFIS*	GGAAAGGCAC	CTTGTATACT	0		0	MG09900.1	0	0	0
4198	2350	ao	AN0646.1	70.m15248	AO070343000583	1					-143	-129	ATGACCGATTCGTGA			ATGACCGATTCGTGA	MTDS*			MTDS*	AAGCTCGTGT	TTTTGATCTG	0	A	0	0	0	0	0
4203	2352	ao	AN1427.1	55.m02928	AO070242000025	1					-397	-353	ATGATACCCTTCGATTTGTTCCTGCCATTCACTTGCTTCCGGTAG			ATGATACCCTTCGATTTGTTCCTGCCATTCACTTGCTTCCGGTAG	MIPFDLFLPFTCFR*			MIPFDLFLPFTCFR*	CTACACATTG	CTTCCCTTTT	0	S	0	0	0	0	0
4204	2352	ao	AN1427.1	55.m02928	AO070242000025	1					-326	-144	ATGTGTGTATCCTTCTCCAAGTTCTCCTTCCCTCCCTCTTCCTTCTGTTTACCTTGCTCCACCTATTTGCCCCCCCTTTTCCTCCTCCTACATTCTTCCTCATCCCTCTTCCTTTCAAGCTTGACCACCACCAAACTCTCCTCCATTCTTGTCTCTCTTTCTCCCCTTTCAATATTTCTTTGA			ATGTGTGTATCCTTCTCCAAGTTCTCCTTCCCTCCCTCTTCCTTCTGTTTACCTTGCTCCACCTATTTGCCCCCCCTTTTCCTCCTCCTACATTCTTCCTCATCCCTCTTCCTTTCAAGCTTGACCACCACCAAACTCTCCTCCATTCTTGTCTCTCTTTCTCCCCTTTCAATATTTCTTTGA	MCVSFSKFSFPPSSFCLPCSTYLPPLFLLLHSSSSLFLSSLTTTKLSSILVSLSPLSIFL*			MCVSFSKFSFPPSSFCLPCSTYLPPLFLLLHSSSSLFLSSLTTTKLSSILVSLSPLSIFL*	ATTTATTTTC	TCCACTATTG	0	S	0	0	0	0	0
4211	2355	ao	AN6409.1	67.m02948	AO070276000080	0					-55	-26	ATGTGCACTATCGTCTCCTCAATCTACTAG			ATGTGCACTATCGTCTCCTCAATCTACTAG	MCTIVSSIY*			MCTIVSSIY*	TCTTTATTTT	CAACCCATCC	1		0	0	0	0	0
4214	2359	ao	AN8880.1	56.m02291	AO070293000010	0					-20	-6	ATGTTTCAAGAGTAG			ATGTTTCAAGAGTAG	MFQE*			MFQE*	GTTGTTTCAA	CGGTCATGAT	1	R	FG00615.1	0	0	0	0
4223	2364	an	AN3828.1	58.m07804	AO070305000065	0	-28	-11					ATGTTCATACTCCCATGA	ATGTTCATACTCCCATGA			MFILP*	MFILP*			GCGGCCGTTG	ATCTCGAGGC	1		0	0	0	0	0
4229	2364	af	AN3828.1	58.m07804	AO070305000065	0			-23	-6			ATGACTCTCTTAGACTGA		ATGACTCTCTTAGACTGA		MTLLD*		MTLLD*		TAGGAGACGC	AAACAATGTC	1		0	0	0	0	0
4259	2373	ao	AN1772.1	69.m15064	AO070324000030	0					-34	-23	ATGTCTCCGTGA			ATGTCTCCGTGA	MSP*			MSP*	GCAGAGGAAA	ACAACAACCA	1		0	0	0	0	0
4261	2374	af	AN6618.1	62.m03214	AO070326000068	0			-58	-38			ATGATGAGAACTTTTCTCTGA		ATGATGAGAACTTTTCTCTGA		MMRTFL*		MMRTFL*		AGTCTTTCGC	AAAAACATCT	1	T	0	0	0	0	0
4262	2374	af	AN6618.1	62.m03214	AO070326000068	0			-55	-38			ATGAGAACTTTTCTCTGA		ATGAGAACTTTTCTCTGA		MRTFL*		MRTFL*		CTTTCGCATG	AAAAACATCT	1	T	0	0	0	0	0
4272	2377	an	AN0484.1	69.m15370	AO070336000183	1	-143	-99					ATGTGTGGAAGCCGCCAAGGATACCAAGGCGGGCCATGGAGATAA	ATGTGTGGAAGCCGCCAAGGATACCAAGGCGGGCCATGGAGATAA			MCGSRQGYQGGPWR*	MCGSRQGYQGGPWR*			TGCTGACTGC	GTATGTGCTA	0		0	0	0	0	0
4276	2377	af	AN0484.1	69.m15370	AO070336000183	1			-139	-122			ATGCGAACTGGGGAGTGA		ATGCGAACTGGGGAGTGA		MRTGE*		MRTGE*		TACTGCTGCC	ACGGTTTTTC	0		0	0	0	0	0
4277	2377	ao	AN0484.1	69.m15370	AO070336000183	1					-185	-108	ATGGGAAGCAAGGGACGGAATTGTGATATGCTCCAACCTCGTGAACCGGGCCGACAGAGGCTTCCGGTTCGAGGATAA			ATGGGAAGCAAGGGACGGAATTGTGATATGCTCCAACCTCGTGAACCGGGCCGACAGAGGCTTCCGGTTCGAGGATAA	MGSKGRNCDMLQPREPGRQRLPVRG*			MGSKGRNCDMLQPREPGRQRLPVRG*	CTTATCAGAT	ATAGGAGCTT	0		0	0	0	0	0
4278	2377	ao	AN0484.1	69.m15370	AO070336000183	1					-158	-108	ATGCTCCAACCTCGTGAACCGGGCCGACAGAGGCTTCCGGTTCGAGGATAA			ATGCTCCAACCTCGTGAACCGGGCCGACAGAGGCTTCCGGTTCGAGGATAA	MLQPREPGRQRLPVRG*			MLQPREPGRQRLPVRG*	GAATTGTGAT	ATAGGAGCTT	0		0	0	0	0	0
4285	2379	af	AN0249.1	54.m06702	AO070338000242	0			-47	-27			ATGACCTTTAATTGCTGCTAG		ATGACCTTTAATTGCTGCTAG		MTFNCC*		MTFNCC*		TCTTCTGGTG	ATACTCTCCC	1		0	0	0	0	0
4286	2379	af	AN0249.1	54.m06702	AO070338000242	0			-16	-2			ATGCACCACAGTTAA		ATGCACCACAGTTAA		MHHS*		MHHS*		ATACTCTCCC	AATGATGGCG	1		0	0	0	0	0
4292	2379	ao	AN0249.1	54.m06702	AO070338000242	0					-60	-34	ATGCTTGACTCTCCTCTGCGCTCGTGA			ATGCTTGACTCTCCTCTGCGCTCGTGA	MLDSPLRS*			MLDSPLRS*	CATTTTCTCT	ACAGAAGCTC	1		0	0	0	0	0
4301	2383	an	AN3711.1	69.m15416	AO070341000337	1	-190	-140					ATGCTCTCGGACGGCGCGATATATTCAATTCAAATCCGTCAAGTTATTTGA	ATGCTCTCGGACGGCGCGATATATTCAATTCAAATCCGTCAAGTTATTTGA			MLSDGAIYSIQIRQVI*	MLSDGAIYSIQIRQVI*			AAGACGCACA	AGCCGAAGTA	0	O	0	0	0	0	0
4302	2383	an	AN3711.1	69.m15416	AO070341000337	1	-126	-109					ATGTTTAACCTGCTCTGA	ATGTTTAACCTGCTCTGA			MFNLL*	MFNLL*			CGAAGTATAC	GCCGTGTATG	0	O	0	0	0	0	0
4306	2383	af	AN3711.1	69.m15416	AO070341000337	1			-238	-194			ATGCTCTGGCACCTAGGCCCTTACCTCTGTTTCCTAAGCCTTTGA		ATGCTCTGGCACCTAGGCCCTTACCTCTGTTTCCTAAGCCTTTGA		MLWHLGPYLCFLSL*		MLWHLGPYLCFLSL*		AAAACGCACA	CGGTGGATGA	0	O	0	0	0	0	0
4307	2383	af	AN3711.1	69.m15416	AO070341000337	1			-187	-140			ATGATCTCCCAAAGCAAAAGGGAGGCCTGCGTACTGCTTCTCTGCTAA		ATGATCTCCCAAAGCAAAAGGGAGGCCTGCGTACTGCTTCTCTGCTAA		MISQSKREACVLLLC*		MISQSKREACVLLLC*		TTGACGGTGG	GGCCAAAGTA	0	O	0	0	0	0	0
4311	2383	ao	AN3711.1	69.m15416	AO070341000337	1					-491	-417	ATGCTTTGGCTCCTCGCTCCAGATCCGGGGAATCGGCTACTACACAAAAAGGCCTACGTACAACTAGCTTTTTAA			ATGCTTTGGCTCCTCGCTCCAGATCCGGGGAATCGGCTACTACACAAAAAGGCCTACGTACAACTAGCTTTTTAA	MLWLLAPDPGNRLLHKKAYVQLAF*			MLWLLAPDPGNRLLHKKAYVQLAF*	AAGACACATA	AACCAAAGTA	0	O	0	0	0	0	0
4351	2394	af	AN3432.1	59.m09292	AO070265000009	1			-86	-75			ATGCCCAATTGA		ATGCCCAATTGA		MPN*		MPN*		AACAACTCGC	ACTACTTAAC	0	G	FG06059.1	MG03853.1	NCU09705.1	YNR071C	0
4352	2394	af	AN3432.1	59.m09292	AO070265000009	1			-52	-38			ATGTCCAACCAGTGA		ATGTCCAACCAGTGA		MSNQ*		MSNQ*		CATTAAGTCC	CAAGATCCCA	1	G	FG06059.1	MG03853.1	NCU09705.1	YNR071C	0
4370	2399	af	AN4991.1	59.m08894	AO070288000071	1			-389	-366			ATGCAGCGCCTCCTAGCGATTTAA		ATGCAGCGCCTCCTAGCGATTTAA		MQRLLAI*		MQRLLAI*		AAATTGTTTT	CCTCGTTCTC	0		0	0	0	0	0
4409	2407	an	AN6923.1	59.m08483	AO070318000108	0	-52	-32					ATGCTTTTCTTCATTGATTAG	ATGCTTTTCTTCATTGATTAG			MLFFID*	MLFFID*			CTTCTTCCTG	TGTGCTGTTG	1	R	0	0	NCU08152.1	0	0
4412	2407	ao	AN6923.1	59.m08483	AO070318000108	0					-55	-41	ATGTTCTCTGCTTGA			ATGTTCTCTGCTTGA	MFSA*			MFSA*	CTTTCTTCAC	TCCGACCTTG	1	R	0	0	NCU08152.1	0	0
4420	2408	ao	AN2342.1	71.m15578	AO070319000156	0					-53	-30	ATGTCTCTGAGTACAGTTCAGTAA			ATGTCTCTGAGTACAGTTCAGTAA	MSLSTVQ*			MSLSTVQ*	CTTTTCATTA	ATTAGCACAT	1		0	0	0	0	0
4469	2422	an	AN2176.1	72.m19664	AO070343000248	1	-145	-83					ATGACTCAACTCCGCACTTCTCGACTGCAGCAATTGCTCCCTATCACGCTCCCTTGTGGATAA	ATGACTCAACTCCGCACTTCTCGACTGCAGCAATTGCTCCCTATCACGCTCCCTTGTGGATAA			MTQLRTSRLQQLLPITLPCG*	MTQLRTSRLQQLLPITLPCG*			ACCATTGCCC	TCTCACGCGT	0		0	0	0	0	0
4470	2422	af	AN2176.1	72.m19664	AO070343000248	1			-364	-296			ATGGTGATGACAGCTGCAAGGGTGGATTCAGGCTGCCATAAGTTCATGATGCGTATACTGGATGATTGA		ATGGTGATGACAGCTGCAAGGGTGGATTCAGGCTGCCATAAGTTCATGATGCGTATACTGGATGATTGA		MVMTAARVDSGCHKFMMRILDD*		MVMTAARVDSGCHKFMMRILDD*		CCTAGGAGTG	CTCAACCCAG	0		0	0	0	0	0
4471	2422	af	AN2176.1	72.m19664	AO070343000248	1			-358	-296			ATGACAGCTGCAAGGGTGGATTCAGGCTGCCATAAGTTCATGATGCGTATACTGGATGATTGA		ATGACAGCTGCAAGGGTGGATTCAGGCTGCCATAAGTTCATGATGCGTATACTGGATGATTGA		MTAARVDSGCHKFMMRILDD*		MTAARVDSGCHKFMMRILDD*		AGTGATGGTG	CTCAACCCAG	0		0	0	0	0	0
4472	2422	af	AN2176.1	72.m19664	AO070343000248	1			-319	-296			ATGATGCGTATACTGGATGATTGA		ATGATGCGTATACTGGATGATTGA		MMRILDD*		MMRILDD*		CCATAAGTTC	CTCAACCCAG	0		0	0	0	0	0
4473	2422	af	AN2176.1	72.m19664	AO070343000248	1			-316	-296			ATGCGTATACTGGATGATTGA		ATGCGTATACTGGATGATTGA		MRILDD*		MRILDD*		TAAGTTCATG	CTCAACCCAG	0		0	0	0	0	0
4474	2422	af	AN2176.1	72.m19664	AO070343000248	1			-303	-259			ATGATTGACTCAACCCAGCGGTGCCCACACTCATTTCTCGAGTGA		ATGATTGACTCAACCCAGCGGTGCCCACACTCATTTCTCGAGTGA		MIDSTQRCPHSFLE*		MIDSTQRCPHSFLE*		CGTATACTGG	CATTGAATTG	0		0	0	0	0	0
4475	2422	ao	AN2176.1	72.m19664	AO070343000248	1					-413	-354	ATGGGAGCTCAATTGAGGGCGGTGACGGAAATAATGATGACGGGTACAATGGGTAACTGA			ATGGGAGCTCAATTGAGGGCGGTGACGGAAATAATGATGACGGGTACAATGGGTAACTGA	MGAQLRAVTEIMMTGTMGN*			MGAQLRAVTEIMMTGTMGN*	TACACCTAGT	AGGTATCTAA	0		0	0	0	0	0
4476	2422	ao	AN2176.1	72.m19664	AO070343000248	1					-380	-354	ATGATGACGGGTACAATGGGTAACTGA			ATGATGACGGGTACAATGGGTAACTGA	MMTGTMGN*			MMTGTMGN*	GACGGAAATA	AGGTATCTAA	0		0	0	0	0	0
4477	2422	ao	AN2176.1	72.m19664	AO070343000248	1					-377	-354	ATGACGGGTACAATGGGTAACTGA			ATGACGGGTACAATGGGTAACTGA	MTGTMGN*			MTGTMGN*	GGAAATAATG	AGGTATCTAA	0		0	0	0	0	0
4478	2422	ao	AN2176.1	72.m19664	AO070343000248	1					-365	-354	ATGGGTAACTGA			ATGGGTAACTGA	MGN*			MGN*	GACGGGTACA	AGGTATCTAA	0		0	0	0	0	0
4482	2424	an	AN5883.1	72.m19248	AO070245000025	0	-30	-13					ATGGCTCGAGCAGAATAA	ATGGCTCGAGCAGAATAA			MARAE*	MARAE*			AACAGTGCTG	GCAGCCCGCA	1	E	0	0	NCU07690.1	0	0
4493	2426	ao	AN7511.1	57.m05828	AO070258000009	1					-164	-129	ATGCTGTACTTCTTGGCAAGGTATGAGAACCCATAA			ATGCTGTACTTCTTGGCAAGGTATGAGAACCCATAA	MLYFLARYENP*			MLYFLARYENP*	TGCCCTGCAT	ATAATTCGGT	0		0	0	0	0	0
4494	2426	ao	AN7511.1	57.m05828	AO070258000009	1					-142	-125	ATGAGAACCCATAAATAA			ATGAGAACCCATAAATAA	MRTHK*			MRTHK*	TTGGCAAGGT	TTCGGTAGAG	0		0	0	0	0	0
4495	2426	ao	AN7511.1	57.m05828	AO070258000009	1					-103	-32	ATGATGAACCATGCCTTGTTTTGGGTACGGAGGAGATTAGTAAGGTTCGAGATAACCCTTTGCAACCACTGA			ATGATGAACCATGCCTTGTTTTGGGTACGGAGGAGATTAGTAAGGTTCGAGATAACCCTTTGCAACCACTGA	MMNHALFWVRRRLVRFEITLCNH*			MMNHALFWVRRRLVRFEITLCNH*	AGTCGGTTTC	ATGACGGTAG	0		0	0	0	0	0
4496	2426	ao	AN7511.1	57.m05828	AO070258000009	1					-100	-32	ATGAACCATGCCTTGTTTTGGGTACGGAGGAGATTAGTAAGGTTCGAGATAACCCTTTGCAACCACTGA			ATGAACCATGCCTTGTTTTGGGTACGGAGGAGATTAGTAAGGTTCGAGATAACCCTTTGCAACCACTGA	MNHALFWVRRRLVRFEITLCNH*			MNHALFWVRRRLVRFEITLCNH*	CGGTTTCATG	ATGACGGTAG	0		0	0	0	0	0
4497	2426	ao	AN7511.1	57.m05828	AO070258000009	1					-93	-64	ATGCCTTGTTTTGGGTACGGAGGAGATTAG			ATGCCTTGTTTTGGGTACGGAGGAGATTAG	MPCFGYGGD*			MPCFGYGGD*	ATGATGAACC	TAAGGTTCGA	0		0	0	0	0	0
4498	2426	ao	AN7511.1	57.m05828	AO070258000009	1					-31	-17	ATGACGGTAGAATAG			ATGACGGTAGAATAG	MTVE*			MTVE*	CAACCACTGA	AGGAGAAGAT	1		0	0	0	0	0
4509	2429	an	AN3459.1	59.m09320	AO070265000036	1	-188	-150					ATGTATCCAGCAGAATGCCCCTCACCCTGCGTAGCATAA	ATGTATCCAGCAGAATGCCCCTCACCCTGCGTAGCATAA			MYPAECPSPCVA*	MYPAECPSPCVA*			AGAAGACTGC	CGACTTCCTT	0	E	FG09893.1	MG00256.1	0	0	0
4510	2429	af	AN3459.1	59.m09320	AO070265000036	1			-226	-125			ATGATTCATCCGTCAACCATAGGTGATTCCTACTGTAGCCGCCCAAATGCCCCTCCCCCTCCGTCGCATTGCAACGTCCCTGACAGACCAAACTCTTCATAA		ATGATTCATCCGTCAACCATAGGTGATTCCTACTGTAGCCGCCCAAATGCCCCTCCCCCTCCGTCGCATTGCAACGTCCCTGACAGACCAAACTCTTCATAA		MIHPSTIGDSYCSRPNAPPPPSHCNVPDRPNSS*		MIHPSTIGDSYCSRPNAPPPPSHCNVPDRPNSS*		TCATCCAATA	GCTCTACAAA	0	E	FG09893.1	MG00256.1	0	0	0
4511	2430	an	AN8832.1	71.m15963	AO070271000047	1	-184	-146					ATGGCCAGATTCTGTTCCCCACACGCCAAAGAGCTCTGA	ATGGCCAGATTCTGTTCCCCACACGCCAAAGAGCTCTGA			MARFCSPHAKEL*	MARFCSPHAKEL*			AAGCTCCGTG	CCTGACGATC	0	J	FG02093.1	0	0	0	0
4512	2430	an	AN8832.1	71.m15963	AO070271000047	1	-120	-79					ATGGGTCAGACCTTTCAGAATTTGTCAAACATCAATCAATAA	ATGGGTCAGACCTTTCAGAATTTGTCAAACATCAATCAATAA			MGQTFQNLSNINQ*	MGQTFQNLSNINQ*			TACAGAGATC	CAGCTTCAAC	0	J	FG02093.1	0	0	0	0
4513	2430	af	AN8832.1	71.m15963	AO070271000047	1			-240	-202			ATGCAATTGAGCTCCTGGTTCGCTCATTGCATTACCTGA		ATGCAATTGAGCTCCTGGTTCGCTCATTGCATTACCTGA		MQLSSWFAHCIT*		MQLSSWFAHCIT*		CGACGAATTT	TTTGGCTCTC	0	J	FG02093.1	0	0	0	0
4514	2430	ao	AN8832.1	71.m15963	AO070271000047	1					-204	-163	ATGGACACTTTTCCTTTTCAATTGTACACCTACGTTCTCTGA			ATGGACACTTTTCCTTTTCAATTGTACACCTACGTTCTCTGA	MDTFPFQLYTYVL*			MDTFPFQLYTYVL*	ACGACATCCC	TGGTGTACTG	0	J	FG02093.1	0	0	0	0
4515	2430	ao	AN8832.1	71.m15963	AO070271000047	1					-163	-152	ATGGTGTACTGA			ATGGTGTACTGA	MVY*			MVY*	ACGTTCTCTG	TTCCGTCCTC	0	J	FG02093.1	0	0	0	0
4521	2431	ao	AN8829.1	72.m19523	AO070271000051	0					-60	-19	ATGTACCCATCACAAGTACATTCTATATCGTCTCTAAAATAG			ATGTACCCATCACAAGTACATTCTATATCGTCTCTAAAATAG	MYPSQVHSISSLK*			MYPSQVHSISSLK*	CATTCCTCAT	CTATTAGTTT	1		0	0	0	0	0
4526	2436	an	AN4684.1	71.m15668	AO070284000040	0	-44	-27					ATGCATCTCAGTAACTAG	ATGCATCTCAGTAACTAG			MHLSN*	MHLSN*			TAACCAAGTT	CTAACTGTTG	1	I	FG08571.1	MG02622.1	0	0	0
4559	2446	ao	AN6330.1	72.m19449	AO070304000108	1					-280	-260	ATGCATGCTCCCGTGTATTGA			ATGCATGCTCCCGTGTATTGA	MHAPVY*			MHAPVY*	AGCCTGCGTC	TTGATTAGAT	0	J	0	MG01742.1	0	0	0
4560	2446	ao	AN6330.1	72.m19449	AO070304000108	1					-276	-256	ATGCTCCCGTGTATTGATTGA			ATGCTCCCGTGTATTGATTGA	MLPCID*			MLPCID*	TGCGTCATGC	TTAGATTTGG	0	J	0	MG01742.1	0	0	0
4561	2446	ao	AN6330.1	72.m19449	AO070304000108	1					-196	-182	ATGATACGCATATAG			ATGATACGCATATAG	MIRI*			MIRI*	ACGGTACATA	ACATACATGC	0	J	0	MG01742.1	0	0	0
4592	2468	an	AN2173.1	72.m19667	AO070343000244	1	-125	-21					ATGCCCCTGCTATTCATACGCCAAAACTCCCCTACTTCGCCGGGGATACACTCAGTTCGCGCGTTCTTGAGCCCCTCGTTCAAAATAATGACGGAAGCCCGATAA	ATGCCCCTGCTATTCATACGCCAAAACTCCCCTACTTCGCCGGGGATACACTCAGTTCGCGCGTTCTTGAGCCCCTCGTTCAAAATAATGACGGAAGCCCGATAA			MPLLFIRQNSPTSPGIHSVRAFLSPSFKIMTEAR*	MPLLFIRQNSPTSPGIHSVRAFLSPSFKIMTEAR*			CGCAGATTCG	TAATCTTATA	0	F	0	0	0	YNL083W	YNL083W
4593	2468	an	AN2173.1	72.m19667	AO070343000244	1	-38	-21					ATGACGGAAGCCCGATAA	ATGACGGAAGCCCGATAA			MTEAR*	MTEAR*			GTTCAAAATA	TAATCTTATA	1	F	0	0	0	YNL083W	YNL083W
4595	2468	af	AN2173.1	72.m19667	AO070343000244	1			-176	-162			ATGCACAGCATATAG		ATGCACAGCATATAG		MHSI*		MHSI*		TGCAATAATA	CGGTTTTTTC	0	F	0	0	0	YNL083W	YNL083W
4596	2468	af	AN2173.1	72.m19667	AO070343000244	1			-123	-52			ATGCACCAGTCATCACGAAAACATACGAACCCCTGCCCTCACAGGGAAAGCTCCGACCTCAAATTTTTGTGA		ATGCACCAGTCATCACGAAAACATACGAACCCCTGCCCTCACAGGGAAAGCTCCGACCTCAAATTTTTGTGA		MHQSSRKHTNPCPHRESSDLKFL*		MHQSSRKHTNPCPHRESSDLKFL*		TACGGATTCG	CCTCTCCGAA	0	F	0	0	0	YNL083W	YNL083W
4597	2468	af	AN2173.1	72.m19667	AO070343000244	1			-37	-17			ATGACGGGTCCTCGGCTATAG		ATGACGGGTCCTCGGCTATAG		MTGPRL*		MTGPRL*		TCCGAAAATA	TCGATAAACA	1	F	0	0	0	YNL083W	YNL083W
4598	2468	ao	AN2173.1	72.m19667	AO070343000244	1					-177	-148	ATGTATGCGGAACCTCTCCTCTCTTTATAA			ATGTATGCGGAACCTCTCCTCTCTTTATAA	MYAEPLLSL*			MYAEPLLSL*	AGACATACCA	ACTAGCTCCA	0	F	0	0	0	YNL083W	YNL083W
4599	2468	ao	AN2173.1	72.m19667	AO070343000244	1					-173	-42	ATGCGGAACCTCTCCTCTCTTTATAAACTAGCTCCACAGATTCGATGCACAAGCTATTATCGCAGTCTACCCTACTACCACCCTGTTTTGACAGGGACACCTCCGCTCTCAAGTCCCGTGACCCCTCCTTGA			ATGCGGAACCTCTCCTCTCTTTATAAACTAGCTCCACAGATTCGATGCACAAGCTATTATCGCAGTCTACCCTACTACCACCCTGTTTTGACAGGGACACCTCCGCTCTCAAGTCCCGTGACCCCTCCTTGA	MRNLSSLYKLAPQIRCTSYYRSLPYYHPVLTGTPPLSSPVTPP*			MRNLSSLYKLAPQIRCTSYYRSLPYYHPVLTGTPPLSSPVTPP*	ATACCAATGT	AAATAATGTC	0	F	0	0	0	YNL083W	YNL083W
4600	2468	ao	AN2173.1	72.m19667	AO070343000244	1					-129	-19	ATGCACAAGCTATTATCGCAGTCTACCCTACTACCACCCTGTTTTGACAGGGACACCTCCGCTCTCAAGTCCCGTGACCCCTCCTTGAAAATAATGTCGGATAGCCGATGA			ATGCACAAGCTATTATCGCAGTCTACCCTACTACCACCCTGTTTTGACAGGGACACCTCCGCTCTCAAGTCCCGTGACCCCTCCTTGAAAATAATGTCGGATAGCCGATGA	MHKLLSQSTLLPPCFDRDTSALKSRDPSLKIMSDSR*			MHKLLSQSTLLPPCFDRDTSALKSRDPSLKIMSDSR*	CACAGATTCG	TAAATTTACA	0	F	0	0	0	YNL083W	YNL083W
4601	2468	ao	AN2173.1	72.m19667	AO070343000244	1					-36	-19	ATGTCGGATAGCCGATGA			ATGTCGGATAGCCGATGA	MSDSR*			MSDSR*	CTTGAAAATA	TAAATTTACA	1	F	0	0	0	YNL083W	YNL083W
4610	2472	ao	AN2016.1	58.m07624	AO070202000009	0					-47	-15	ATGATTTCTAAAGGCTCCACATCGGCGAGATAG			ATGATTTCTAAAGGCTCCACATCGGCGAGATAG	MISKGSTSAR*			MISKGSTSAR*	GCGGGATGCC	TATCCTATCC	1		0	0	0	0	0
4614	2474	af	AN0842.1	70.m15442	AO070216000002	0			-56	-3			ATGTGGACCCGAATGAGAGACGTCGTGATCTGTTCTTACCAAGCGCTTCTGTGA		ATGTGGACCCGAATGAGAGACGTCGTGATCTGTTCTTACCAAGCGCTTCTGTGA		MWTRMRDVVICSYQALL*		MWTRMRDVVICSYQALL*		AACTTCTCAT	ACATGGCGGA	1	R	0	0	0	0	0
4615	2474	af	AN0842.1	70.m15442	AO070216000002	0			-44	-3			ATGAGAGACGTCGTGATCTGTTCTTACCAAGCGCTTCTGTGA		ATGAGAGACGTCGTGATCTGTTCTTACCAAGCGCTTCTGTGA		MRDVVICSYQALL*		MRDVVICSYQALL*		GTGGACCCGA	ACATGGCGGA	1	R	0	0	0	0	0
4617	2474	ao	AN0842.1	70.m15442	AO070216000002	0					-40	-23	ATGAGAGCCCCTCATTAA			ATGAGAGCCCCTCATTAA	MRAPH*			MRAPH*	GCGGATTCGC	GTTCATATTC	1	R	0	0	0	0	0
4638	2493	af	AN3812.1	57.m05670	AO070311000009	1			-49	-11			ATGAAGAAAAGAAATTGGTGGACGATAACAATAATTTGA		ATGAAGAAAAGAAATTGGTGGACGATAACAATAATTTGA		MKKRNWWTITII*		MKKRNWWTITII*		AAGCCGGTTG	ACAACTCAGG	1	J	FG09363.1	MG06785.1	0	0	0
4643	2494	af	AN8344.1	53.m04018	AO070312000017	0			-47	-9			ATGCCGGAACAGTACGAACGTGATCCTCACCTCGGTTGA		ATGCCGGAACAGTACGAACGTGATCCTCACCTCGGTTGA		MPEQYERDPHLG*		MPEQYERDPHLG*		TACATTCCTG	TCGACCCTAT	1	Q	0	0	0	0	0
4656	2496	an	AN3359.1	66.m04660	AO070317000081	0	-36	-22					ATGAGCTTTCAATGA	ATGAGCTTTCAATGA			MSFQ*	MSFQ*			CCTCTACATC	ATATCTACAC	1	E	0	0	0	0	0
4688	2508	an	AN5455.1	69.m15477	AO070341000411	0	-44	-21					ATGGACACATTGCTCGAATTTTAA	ATGGACACATTGCTCGAATTTTAA			MDTLLEF*	MDTLLEF*			TTATCGAGGG	AAAGGATTTG	1	S	FG07262.1	MG04995.1	0	0	0
4690	2508	af	AN5455.1	69.m15477	AO070341000411	0			-48	-37			ATGGCCGTCTAA		ATGGCCGTCTAA		MAV*		MAV*		TCGTTGAGCG	TCTGATTGCC	1	S	FG07262.1	MG04995.1	0	0	0
4691	2508	ao	AN5455.1	69.m15477	AO070341000411	0					-47	-21	ATGGGTTACTATTGTAAATACGGTTAA			ATGGGTTACTATTGTAAATACGGTTAA	MGYYCKYG*			MGYYCKYG*	TTTCTGAGGG	GAAACAATTT	1	S	FG07262.1	MG04995.1	0	0	0
4716	2517	an	AN2278.1	71.m15923	AO070295000054	0	-27	-13					ATGAATAGACAATAA	ATGAATAGACAATAA			MNRQ*	MNRQ*			TCTTATATTT	ACGCGCTCGA	1	BK	0	0	0	0	0
4718	2517	ao	AN2278.1	71.m15923	AO070295000054	0					-27	-4	ATGAACAGTAAAACTACGCGCTAA			ATGAACAGTAAAACTACGCGCTAA	MNSKTTR*			MNSKTTR*	TACTCCGTCT	ATCATGGCTT	1	BK	0	0	0	0	0
4724	2521	af	AN1685.1	58.m07761	AO070305000004	0			-56	-12			ATGGTTTCCCGATCAGATTCAACGACGGAGGAATCGCAACCCTAA		ATGGTTTCCCGATCAGATTCAACGACGGAGGAATCGCAACCCTAA		MVSRSDSTTEESQP*		MVSRSDSTTEESQP*		CGAGGGGAGG	TTGTCGGTAT	1	R	0	0	0	0	0
4734	2524	an	AN8206.1	53.m03768	AO070310000111	0	-55	-20					ATGACAGAACACTTCTACCTCAATCATCTACGCTGA	ATGACAGAACACTTCTACCTCAATCATCTACGCTGA			MTEHFYLNHLR*	MTEHFYLNHLR*			GGTCTCCAAA	GAGGCGATGC	1	Q	0	0	0	0	0
4757	2532	af	AN4007.1	54.m06583	AO070328000146	0			-25	-14			ATGAGCAACTGA		ATGAGCAACTGA		MSN*		MSN*		ACTCATTTGA	TCCAGGTCCG	1	C	0	0	0	0	0
4778	2535	af	AN1129.1	70.m15106	AO070331000121	0			-43	-17			ATGTTGCTAGATCGTGGAACTGACTGA		ATGTTGCTAGATCGTGGAACTGACTGA		MLLDRGTD*		MLLDRGTD*		TATATTTAGA	ACACATCATC	1	P	0	0	0	0	0
4785	2541	an	AN2985.1	59.m09028	AO070337000137	0	-13	-2					ATGTGCTGGTGA	ATGTGCTGGTGA			MCW*	MCW*			TCGTACTATT	AATGGCGGCA	1	R	0	0	0	0	0
4787	2545	an	AN2895.1	59.m08744	AO070338000115	1	-72	-25					ATGATTTTTCTAAGCCATTCAAGGCTCTGCCTAGCGTCTCCGCACTAA	ATGATTTTTCTAAGCCATTCAAGGCTCTGCCTAGCGTCTCCGCACTAA			MIFLSHSRLCLASPH*	MIFLSHSRLCLASPH*			CTTGTTATTC	GAAGGCCCTA	0	S	0	0	0	0	0
4817	2556	an	AN4323.1	58.m08000	AO070230000015	1	-61	-38					ATGATCCCTTCGCTGTTTTGCTGA	ATGATCCCTTCGCTGTTTTGCTGA			MIPSLFC*	MIPSLFC*			CGGCATTGAT	GAATTGACTA	0	E	0	MG02489.1	0	YHR208W	0
4855	2566	ao	AN0590.1	69.m15259	AO070280000012	1					-98	-78	ATGCGGAGCTTTTATCAGTAG			ATGCGGAGCTTTTATCAGTAG	MRSFYQ*			MRSFYQ*	TCTATTCTCC	CATCCGAATC	0	O	FG09767.1	MG04180.1	NCU07713.1	0	0
4856	2569	af	AN5154.1	54.m06864	AO070291000014	0			-44	-6			ATGTCACTTGGGAGGTCGCCTTTTATTGTGGTGAGCTGA		ATGTCACTTGGGAGGTCGCCTTTTATTGTGGTGAGCTGA		MSLGRSPFIVVS*		MSLGRSPFIVVS*		TAGAGCTTGG	CAGAAATGTC	1	A	0	0	0	0	0
4930	2592	af	AN9086.1	66.m04759	AO070332000191	0			-14	-3			ATGCAAAGCTAG		ATGCAAAGCTAG		MQS*		MQS*		AAACATTTAG	ACATGTCGTC	1	U	FG02649.1	MG04694.1	0	YKR068C	0
4940	2597	an	AN6722.1	65.m07248	AO070339000165	1	-299	-270					ATGAACGTACTGCCCTATTTCCGAAACTAG	ATGAACGTACTGCCCTATTTCCGAAACTAG			MNVLPYFRN*	MNVLPYFRN*			ATATTGCGGA	GTGGGCCCTC	0	R	0	0	0	0	0
4941	2597	an	AN6722.1	65.m07248	AO070339000165	1	-156	-61					ATGAGCTCGATCTTGCGTTATTCGAGCTCCGATACGGGAACCTATCGATTGCCAATGTTACCGTGCCATTCGTTAGTGGAGGTGTCGTTAGTTTGA	ATGAGCTCGATCTTGCGTTATTCGAGCTCCGATACGGGAACCTATCGATTGCCAATGTTACCGTGCCATTCGTTAGTGGAGGTGTCGTTAGTTTGA			MSSILRYSSSDTGTYRLPMLPCHSLVEVSLV*	MSSILRYSSSDTGTYRLPMLPCHSLVEVSLV*			GTCGCTTTCA	TATAACAGTC	0	R	0	0	0	0	0
4942	2597	an	AN6722.1	65.m07248	AO070339000165	1	-102	-61					ATGTTACCGTGCCATTCGTTAGTGGAGGTGTCGTTAGTTTGA	ATGTTACCGTGCCATTCGTTAGTGGAGGTGTCGTTAGTTTGA			MLPCHSLVEVSLV*	MLPCHSLVEVSLV*			TCGATTGCCA	TATAACAGTC	0	R	0	0	0	0	0
4943	2597	af	AN6722.1	65.m07248	AO070339000165	1			-227	-180			ATGCTATCCAACTCTACCATAAATCTACTCTGCATGCAAATCGTGTGA		ATGCTATCCAACTCTACCATAAATCTACTCTGCATGCAAATCGTGTGA		MLSNSTINLLCMQIV*		MLSNSTINLLCMQIV*		TTTTTCTTTG	GATTTCAAAT	0	R	0	0	0	0	0
4944	2597	af	AN6722.1	65.m07248	AO070339000165	1			-194	-180			ATGCAAATCGTGTGA		ATGCAAATCGTGTGA		MQIV*		MQIV*		TCTACTCTGC	GATTTCAAAT	0	R	0	0	0	0	0
4945	2597	af	AN6722.1	65.m07248	AO070339000165	1			-157	-119			ATGATCTCCTCCTGGATATACCGTATTAGTGTGCACTGA		ATGATCTCCTCCTGGATATACCGTATTAGTGTGCACTGA		MISSWIYRISVH*		MISSWIYRISVH*		ATCAACTTGC	TGTAATTATA	0	R	0	0	0	0	0
4946	2597	ao	AN6722.1	65.m07248	AO070339000165	1					-322	-281	ATGGGACCTCGGTTATATTTCGTGAATGTTTCAATCCCTTGA			ATGGGACCTCGGTTATATTTCGTGAATGTTTCAATCCCTTGA	MGPRLYFVNVSIP*			MGPRLYFVNVSIP*	TGTAAACCAA	ACTTCATAGT	0	R	0	0	0	0	0
4947	2597	ao	AN6722.1	65.m07248	AO070339000165	1					-297	-235	ATGTTTCAATCCCTTGAACTTCATAGTGGCTGCTGGTTCTTTGTTGGCTTCCGGCGCACCTGA			ATGTTTCAATCCCTTGAACTTCATAGTGGCTGCTGGTTCTTTGTTGGCTTCCGGCGCACCTGA	MFQSLELHSGCWFFVGFRRT*			MFQSLELHSGCWFFVGFRRT*	TATTTCGTGA	GCAACCGCTG	0	R	0	0	0	0	0
4952	2599	an	AN5932.1	72.m19197	AO070340000348	0	-49	-26					ATGCCTATCATTTCTATGGAATAA	ATGCCTATCATTTCTATGGAATAA			MPIISME*	MPIISME*			ATCACATTCC	TTGCCAGGCT	1	L	FG05421.1	MG06397.1	0	0	0
4955	2599	af	AN5932.1	72.m19197	AO070340000348	0			-39	-22			ATGACCACCCATCGATAA		ATGACCACCCATCGATAA		MTTHR*		MTTHR*		GAGGTCATTG	GTCGGCTAGA	1	L	FG05421.1	MG06397.1	0	0	0
4958	2599	ao	AN5932.1	72.m19197	AO070340000348	0					-38	-21	ATGGACGCCAATTCTTAG			ATGGACGCCAATTCTTAG	MDANS*			MDANS*	AAGGTGTTTA	GGATCTTCTA	1	L	FG05421.1	MG06397.1	0	0	0
4973	2603	an	AN0673.1	70.m15275	AO070343000547	1	-78	-43					ATGATCTCTTTTGTCTCTCTCTCTCGAATTGATTGA	ATGATCTCTTTTGTCTCTCTCTCTCGAATTGATTGA			MISFVSLSRID*	MISFVSLSRID*			CCTCATATTC	CATATCTTCA	0	Z	0	0	NCU07171.1	0	0
4979	2603	ao	AN0673.1	70.m15275	AO070343000547	1					-67	-32	ATGATCGCATTTGTTTGTTACTCTGGAATTATTTGA			ATGATCGCATTTGTTTGTTACTCTGGAATTATTTGA	MIAFVCYSGII*			MIAFVCYSGII*	CTACATCCCC	GCATTTACTA	0	Z	0	0	NCU07171.1	0	0
4989	2604	af	AN0654.1	70.m15258	AO070343000572	0			-60	-22			ATGTTTGACACCTCGTGGGCAGAGCACGTTCTAAAGTGA		ATGTTTGACACCTCGTGGGCAGAGCACGTTCTAAAGTGA		MFDTSWAEHVLK*		MFDTSWAEHVLK*		TTTCACGTGC	GAGCCGTTGA	1	H	FG10097.1	0	0	0	0
5002	2608	af	AN5908.1	72.m19223	AO070245000002	1			-442	-425			ATGACTAGCAGATATTGA		ATGACTAGCAGATATTGA		MTSRY*		MTSRY*		GAAGCATCCC	CAAGACAAGT	0	G	FG06702.1	0	NCU07550.1	0	0
5007	2608	af	AN5908.1	72.m19223	AO070245000002	1			-196	-38			ATGACATTCCTGTCATTCCCCAGAATGCTTACTCCCCTCATTGGCAGCCAAATTGTACCTATCCTAGAGCCTATCCGAGGGGCATCCGAGCTCGCATCCTGCCTTCGCTACCAGTCGCTCAATCAACAACAGAGGACCAGAATCAACAGAGAACAATAA		ATGACATTCCTGTCATTCCCCAGAATGCTTACTCCCCTCATTGGCAGCCAAATTGTACCTATCCTAGAGCCTATCCGAGGGGCATCCGAGCTCGCATCCTGCCTTCGCTACCAGTCGCTCAATCAACAACAGAGGACCAGAATCAACAGAGAACAATAA		MTFLSFPRMLTPLIGSQIVPILEPIRGASELASCLRYQSLNQQQRTRINREQ*		MTFLSFPRMLTPLIGSQIVPILEPIRGASELASCLRYQSLNQQQRTRINREQ*		GAAGAGTGGC	ATACTCAAGC	0	G	FG06702.1	0	NCU07550.1	0	0
5008	2608	af	AN5908.1	72.m19223	AO070245000002	1			-172	-38			ATGCTTACTCCCCTCATTGGCAGCCAAATTGTACCTATCCTAGAGCCTATCCGAGGGGCATCCGAGCTCGCATCCTGCCTTCGCTACCAGTCGCTCAATCAACAACAGAGGACCAGAATCAACAGAGAACAATAA		ATGCTTACTCCCCTCATTGGCAGCCAAATTGTACCTATCCTAGAGCCTATCCGAGGGGCATCCGAGCTCGCATCCTGCCTTCGCTACCAGTCGCTCAATCAACAACAGAGGACCAGAATCAACAGAGAACAATAA		MLTPLIGSQIVPILEPIRGASELASCLRYQSLNQQQRTRINREQ*		MLTPLIGSQIVPILEPIRGASELASCLRYQSLNQQQRTRINREQ*		ATTCCCCAGA	ATACTCAAGC	0	G	FG06702.1	0	NCU07550.1	0	0
5009	2608	ao	AN5908.1	72.m19223	AO070245000002	1					-516	-436	ATGCATTCGCGTGGGACGATCGACTGTCTCCTCTTTCTGTCGCTGGGGAAGCCCACTTGGTTACCGAAACTCATGTTTTAG			ATGCATTCGCGTGGGACGATCGACTGTCTCCTCTTTCTGTCGCTGGGGAAGCCCACTTGGTTACCGAAACTCATGTTTTAG	MHSRGTIDCLLFLSLGKPTWLPKLMF*			MHSRGTIDCLLFLSLGKPTWLPKLMF*	CCGCCGGGGG	TCCCAGACTT	0	G	FG06702.1	0	NCU07550.1	0	0
5014	2609	an	AN0827.1	70.m15428	AO070255000018	0	-56	-45					ATGACCCCTTAA	ATGACCCCTTAA			MTP*	MTP*			TCGATCAACA	CGACGGTCTG	1	S	0	0	NCU00913.1	YJL091C	0
5036	2616	af	AN3970.1	54.m06355	AO070286000067	1			-67	-56			ATGTTGACTTAA		ATGTTGACTTAA		MLT*		MLT*		GCTATTTCCA	ATTCAAGTTG	0	Z	0	0	0	0	0
5070	2627	af	AN3829.1	58.m07805	AO070305000066	1			-376	-221			ATGCGTGCTGTTCTAAGAATGACGTCGACCCACGTGATGGACATCTCTCCCCGCTTAGAGGAAACTGGTGGTAATGAATGCTTGACAAGCTCGGAGATACGATTAGCATTACTTTACATACTCCATCGTTGGATCCATCCTTCCCTGGATTTATAA		ATGCGTGCTGTTCTAAGAATGACGTCGACCCACGTGATGGACATCTCTCCCCGCTTAGAGGAAACTGGTGGTAATGAATGCTTGACAAGCTCGGAGATACGATTAGCATTACTTTACATACTCCATCGTTGGATCCATCCTTCCCTGGATTTATAA		MRAVLRMTSTHVMDISPRLEETGGNECLTSSEIRLALLYILHRWIHPSLDL*		MRAVLRMTSTHVMDISPRLEETGGNECLTSSEIRLALLYILHRWIHPSLDL*		TGGAGAATAG	AGTATAAAGA	0	C	FG06752.1	0	0	0	0
5071	2627	af	AN3829.1	58.m07805	AO070305000066	1			-358	-221			ATGACGTCGACCCACGTGATGGACATCTCTCCCCGCTTAGAGGAAACTGGTGGTAATGAATGCTTGACAAGCTCGGAGATACGATTAGCATTACTTTACATACTCCATCGTTGGATCCATCCTTCCCTGGATTTATAA		ATGACGTCGACCCACGTGATGGACATCTCTCCCCGCTTAGAGGAAACTGGTGGTAATGAATGCTTGACAAGCTCGGAGATACGATTAGCATTACTTTACATACTCCATCGTTGGATCCATCCTTCCCTGGATTTATAA		MTSTHVMDISPRLEETGGNECLTSSEIRLALLYILHRWIHPSLDL*		MTSTHVMDISPRLEETGGNECLTSSEIRLALLYILHRWIHPSLDL*		TGTTCTAAGA	AGTATAAAGA	0	C	FG06752.1	0	0	0	0
5072	2627	af	AN3829.1	58.m07805	AO070305000066	1			-340	-221			ATGGACATCTCTCCCCGCTTAGAGGAAACTGGTGGTAATGAATGCTTGACAAGCTCGGAGATACGATTAGCATTACTTTACATACTCCATCGTTGGATCCATCCTTCCCTGGATTTATAA		ATGGACATCTCTCCCCGCTTAGAGGAAACTGGTGGTAATGAATGCTTGACAAGCTCGGAGATACGATTAGCATTACTTTACATACTCCATCGTTGGATCCATCCTTCCCTGGATTTATAA		MDISPRLEETGGNECLTSSEIRLALLYILHRWIHPSLDL*		MDISPRLEETGGNECLTSSEIRLALLYILHRWIHPSLDL*		GACCCACGTG	AGTATAAAGA	0	C	FG06752.1	0	0	0	0
5073	2627	af	AN3829.1	58.m07805	AO070305000066	1			-303	-292			ATGAATGCTTGA		ATGAATGCTTGA		MNA*		MNA*		ACTGGTGGTA	CAAGCTCGGA	0	C	FG06752.1	0	0	0	0
5074	2627	af	AN3829.1	58.m07805	AO070305000066	1			-299	-189			ATGCTTGACAAGCTCGGAGATACGATTAGCATTACTTTACATACTCCATCGTTGGATCCATCCTTCCCTGGATTTATAAAGTATAAAGATAACTTTTTCCTCCTCCCGTAG		ATGCTTGACAAGCTCGGAGATACGATTAGCATTACTTTACATACTCCATCGTTGGATCCATCCTTCCCTGGATTTATAAAGTATAAAGATAACTTTTTCCTCCTCCCGTAG		MLDKLGDTISITLHTPSLDPSFPGFIKYKDNFFLLP*		MLDKLGDTISITLHTPSLDPSFPGFIKYKDNFFLLP*		GTGGTAATGA	ATAAAGCCCT	0	C	FG06752.1	0	0	0	0
5075	2627	ao	AN3829.1	58.m07805	AO070305000066	1					-440	-357	ATGACGTCGATACACGTGACGCGGAGCTTCCCCGCTGGACGGCATTACAGGGAGCAGCTCGGAGGCATTCTCAACAATGATTAG			ATGACGTCGATACACGTGACGCGGAGCTTCCCCGCTGGACGGCATTACAGGGAGCAGCTCGGAGGCATTCTCAACAATGATTAG	MTSIHVTRSFPAGRHYREQLGGILNND*			MTSIHVTRSFPAGRHYREQLGGILNND*	AAATAGAGAA	TCTCCACGCG	0	C	FG06752.1	0	0	0	0
5076	2627	ao	AN3829.1	58.m07805	AO070305000066	1					-364	-317	ATGATTAGTCTCCACGCGATGGATCAACCTCGCTCCTGCAGTATATAA			ATGATTAGTCTCCACGCGATGGATCAACCTCGCTCCTGCAGTATATAA	MISLHAMDQPRSCSI*			MISLHAMDQPRSCSI*	ATTCTCAACA	GTCTGAAGCA	0	C	FG06752.1	0	0	0	0
5077	2627	ao	AN3829.1	58.m07805	AO070305000066	1					-346	-317	ATGGATCAACCTCGCTCCTGCAGTATATAA			ATGGATCAACCTCGCTCCTGCAGTATATAA	MDQPRSCSI*			MDQPRSCSI*	TCTCCACGCG	GTCTGAAGCA	0	C	FG06752.1	0	0	0	0
5111	2649	an	AN6720.1	65.m07477	AO070339000162	1	-253	-197					ATGACCTCACCGCAATCCAGGTCCGCATCGACTTCCACCCTGTTCTGCTGCTATTGA	ATGACCTCACCGCAATCCAGGTCCGCATCGACTTCCACCCTGTTCTGCTGCTATTGA			MTSPQSRSASTSTLFCCY*	MTSPQSRSASTSTLFCCY*			GCGTTACTCA	TCGTGTGATA	0	G	0	0	0	0	0
5127	2654	af	AN1918.1	69.m14936	AO070341000122	1			-339	-289			ATGCATGTACCCGTGCGTTATCATCCATTATCCACGAGTCATCAAGAATAA		ATGCATGTACCCGTGCGTTATCATCCATTATCCACGAGTCATCAAGAATAA		MHVPVRYHPLSTSHQE*		MHVPVRYHPLSTSHQE*		TCTCAGCCCG	TTTATCCCTT	0	C	FG08601.1	0	NCU09873.1	0	0
5128	2654	af	AN1918.1	69.m14936	AO070341000122	1			-335	-252			ATGTACCCGTGCGTTATCATCCATTATCCACGAGTCATCAAGAATAATTTATCCCTTCCCGATCAGTCCTCCCTGCAGCACTAA		ATGTACCCGTGCGTTATCATCCATTATCCACGAGTCATCAAGAATAATTTATCCCTTCCCGATCAGTCCTCCCTGCAGCACTAA		MYPCVIIHYPRVIKNNLSLPDQSSLQH*		MYPCVIIHYPRVIKNNLSLPDQSSLQH*		AGCCCGATGC	GTACGTCGTC	0	C	FG08601.1	0	NCU09873.1	0	0
5129	2654	af	AN1918.1	69.m14936	AO070341000122	1			-143	-3			ATGAGAGGCATTTTTGTTCACTCCACGGCTAACCATCATCGCTGCAGACTCATTCCTCAACCCCGACATCACCCGCGGAACTGTGGAGAAGTAGATCGGAGAGGATCCTTGAAACTGCCCTTGAGACCTGTATCATCGTGA		ATGAGAGGCATTTTTGTTCACTCCACGGCTAACCATCATCGCTGCAGACTCATTCCTCAACCCCGACATCACCCGCGGAACTGTGGAGAAGTAGATCGGAGAGGATCCTTGAAACTGCCCTTGAGACCTGTATCATCGTGA		MRGIFVHSTANHHRCRLIPQPRHHPRNCGEVDRRGSLKLPLRPVSS*		MRGIFVHSTANHHRCRLIPQPRHHPRNCGEVDRRGSLKLPLRPVSS*		CGGACAGTCT	GCATGGCTCC	0	C	FG08601.1	0	NCU09873.1	0	0
5130	2654	ao	AN1918.1	69.m14936	AO070341000122	1					-449	-135	ATGAGACATTTCTTGACTGGATACCATCCGCGCGTTATCATAATCCAGAGACACACCCCTTTATTTTCATTCCGAAAATCGCATTTTCTTGCTTCTAGTTGGTGCACCCGACCGGTTTTCCCGGAACCACTTCGTGCCTACATCTGGGGTTCGGAACAAGTCGGAGAACCCACAAGAGGCATTTTACACACTCCAGAGTCCACGGTTACCAACGCTGCCTCAGCCCGGTCTTCAGCCCCGACATCTCCCGTCAAACTGTGGAGAAGCATATCGGAGTCGAAGACTGAAACGCCTTCTGGACTTACTTTGCTGTGA			ATGAGACATTTCTTGACTGGATACCATCCGCGCGTTATCATAATCCAGAGACACACCCCTTTATTTTCATTCCGAAAATCGCATTTTCTTGCTTCTAGTTGGTGCACCCGACCGGTTTTCCCGGAACCACTTCGTGCCTACATCTGGGGTTCGGAACAAGTCGGAGAACCCACAAGAGGCATTTTACACACTCCAGAGTCCACGGTTACCAACGCTGCCTCAGCCCGGTCTTCAGCCCCGACATCTCCCGTCAAACTGTGGAGAAGCATATCGGAGTCGAAGACTGAAACGCCTTCTGGACTTACTTTGCTGTGA	MRHFLTGYHPRVIIIQRHTPLFSFRKSHFLASSWCTRPVFPEPLRAYIWGSEQVGEPTRGILHTPESTVTNAASARSSAPTSPVKLWRSISESKTETPSGLTLL*			MRHFLTGYHPRVIIIQRHTPLFSFRKSHFLASSWCTRPVFPEPLRAYIWGSEQVGEPTRGILHTPESTVTNAASARSSAPTSPVKLWRSISESKTETPSGLTLL*	TTGCTCCTGC	TCATGGCTCC	0	C	FG08601.1	0	NCU09873.1	0	0
5131	2655	conserved	AN5528.1	69.m15427	AO070341000360	1	-69	-58	-59	-48	-67	-56	ATGsTyyCyTGA	ATGCTCCCCTGA	ATGGTCTCTTGA	ATGGTTCCTTGA	Mlp*	MLP*	MVS*	MVP*	CrCkmywAhr	skAhAvrbhG	0	U	0	0	NCU05029.1	0	0
5133	2655	af	AN5528.1	69.m15427	AO070341000360	1			-62	-48			ATGATGGTCTCTTGA		ATGATGGTCTCTTGA		MMVS*		MMVS*		ACACACGCCT	CGATACATCG	0	U	0	0	NCU05029.1	0	0
5139	2662	ao	AN7387.1	71.m15107	AO070343000118	1					-203	-75	ATGTTTATATCCAACCCCGCCCTGCAACTCCCATCCCGGCACCGCCTTCCCTATTTCAGGACAAGTAATGCCAACTTCGGCGGGCGGTCGGTTTGTGCCCCGCCTTTTGACCGAGTGGGGGAATTTTAG			ATGTTTATATCCAACCCCGCCCTGCAACTCCCATCCCGGCACCGCCTTCCCTATTTCAGGACAAGTAATGCCAACTTCGGCGGGCGGTCGGTTTGTGCCCCGCCTTTTGACCGAGTGGGGGAATTTTAG	MFISNPALQLPSRHRLPYFRTSNANFGGRSVCAPPFDRVGEF*			MFISNPALQLPSRHRLPYFRTSNANFGGRSVCAPPFDRVGEF*	TTTTTACGTC	GATCATGTCC	0	E	0	0	0	0	0
5142	2664	af	AN2163.1	72.m19677	AO070343000222	1			-700	-665			ATGTCCCCTGTTTCAAAACTTGTTGTCTGTATGTAA		ATGTCCCCTGTTTCAAAACTTGTTGTCTGTATGTAA		MSPVSKLVVCM*		MSPVSKLVVCM*		CTTTCTTTGC	GTATCAATCA	0	D	0	0	0	0	0
5164	2669	af	AN4333.1	58.m09007	AO070240000012	0			-39	-19			ATGTGGCAGCCAGGTTGTTGA		ATGTGGCAGCCAGGTTGTTGA		MWQPGC*		MWQPGC*		CTCAAAGGAC	AATAAATTGA	1		0	0	NCU10035.1	0	0
5165	2671	conserved	AN3144.1	59.m08521	AO070256000047	0	-23	-12	-25	-14	-23	-12	ATGCTCymmTAA	ATGCTCCCATAA	ATGCTCCCATAA	ATGCTCTACTAA	MLp*	MLP*	MLP*	MLY*	TyyhyyTCCC	yCbrmdyCwm	1	R	FG04221.1	MG09837.1	0	YDR323C	0
5173	2672	an	AN5808.1	72.m18938	AO070260000039	1	-310	-281					ATGCCGAACCATCGCAGTTACCCATGTTGA	ATGCCGAACCATCGCAGTTACCCATGTTGA			MPNHRSYPC*	MPNHRSYPC*			GTCTAGAGAC	CCTGGGCTAC	0		0	0	0	0	0
5177	2672	af	AN5808.1	72.m18938	AO070260000039	1			-277	-266			ATGGGCTTCTAA		ATGGGCTTCTAA		MGF*		MGF*		AAATCTCACC	TCGTTGTGTA	0		0	0	0	0	0
5178	2672	af	AN5808.1	72.m18938	AO070260000039	1			-179	-144			ATGTTCCAAGCCACAGGACAGAGAGTTTGGTCTTAG		ATGTTCCAAGCCACAGGACAGAGAGTTTGGTCTTAG		MFQATGQRVWS*		MFQATGQRVWS*		CATTTCGAGG	GTGACGGGTA	0		0	0	0	0	0
5180	2672	ao	AN5808.1	72.m18938	AO070260000039	1					-277	-248	ATGAATTTACCCCAGTATTATGATAATTAA			ATGAATTTACCCCAGTATTATGATAATTAA	MNLPQYYDN*			MNLPQYYDN*	ACTGACTAGA	GTGCTCAAAT	0		0	0	0	0	0
5182	2672	ao	AN5808.1	72.m18938	AO070260000039	1					-239	-201	ATGAACTTCTGTCCTTATTTTCGTCCAATGCAGCTATGA			ATGAACTTCTGTCCTTATTTTCGTCCAATGCAGCTATGA	MNFCPYFRPMQL*			MNFCPYFRPMQL*	AAGTGCTCAA	GACACTCCAC	0		0	0	0	0	0
5183	2672	ao	AN5808.1	72.m18938	AO070260000039	1					-212	-201	ATGCAGCTATGA			ATGCAGCTATGA	MQL*			MQL*	TTTTCGTCCA	GACACTCCAC	0		0	0	0	0	0
5185	2672	ao	AN5808.1	72.m18938	AO070260000039	1					-161	-114	ATGGTAATCCAACTGCTGCTTACTTCACTCGTCCCCCACACATACTGA			ATGGTAATCCAACTGCTGCTTACTTCACTCGTCCCCCACACATACTGA	MVIQLLLTSLVPHTY*			MVIQLLLTSLVPHTY*	ACCGTCGGTT	TGAACAACAG	0		0	0	0	0	0
5188	2673	an	AN3439.1	59.m09299	AO070265000013	0	-45	-16					ATGAAAGTCCCTTCTATGTTCGCGTCCTAG	ATGAAAGTCCCTTCTATGTTCGCGTCCTAG			MKVPSMFAS*	MKVPSMFAS*			CACGCCGTAT	GAAATCTGAC	1	S	0	0	0	0	0
5189	2673	an	AN3439.1	59.m09299	AO070265000013	0	-30	-16					ATGTTCGCGTCCTAG	ATGTTCGCGTCCTAG			MFAS*	MFAS*			AGTCCCTTCT	GAAATCTGAC	1	S	0	0	0	0	0
5194	2679	an	AN7785.1	71.m15814	AO070286000027	1	-26	-6					ATGTTTGTTTCTAATCTCTGA	ATGTTTGTTTCTAATCTCTGA			MFVSNL*	MFVSNL*			TTTTCTTTCC	TCGCTATGAC	1		0	0	0	0	0
5195	2679	af	AN7785.1	71.m15814	AO070286000027	1			-33	-19			ATGTGTGCTTTTTAA		ATGTGTGCTTTTTAA		MCAF*		MCAF*		CTTTTACCTC	AACTTGTTGC	1		0	0	0	0	0
5196	2679	ao	AN7785.1	71.m15814	AO070286000027	1					-32	-18	ATGTCCATCCTCTAA			ATGTCCATCCTCTAA	MSIL*			MSIL*	TCCAACTCTC	CTCCTTCCAC	1		0	0	0	0	0
5238	2688	an	AN6182.1	72.m19274	AO070308000124	0	-32	-18					ATGTTAATTCAATAA	ATGTTAATTCAATAA			MLIQ*	MLIQ*			CTGTATCTTG	TCAATATCCT	1	C	FG05668.1	MG05098.1	0	0	0
5264	2704	an	AN2764.1	59.m09260	AO070327000027	1	-233	-174					ATGTGGCTGTGGCAGTTCTCAGGTCTAGTACTTCAGGGCTCCGTAGAGGACTTAGTCTAG	ATGTGGCTGTGGCAGTTCTCAGGTCTAGTACTTCAGGGCTCCGTAGAGGACTTAGTCTAG			MWLWQFSGLVLQGSVEDLV*	MWLWQFSGLVLQGSVEDLV*			TGTCGAGCCA	ATAGGTAGGA	0	L	0	0	0	0	0
5265	2704	an	AN2764.1	59.m09260	AO070327000027	1	-129	-58					ATGACGCTATACCAAATGCAGTCTAATGGTGTCAGCGCGTTCAACGCGTTTCATGCCCGCCACCGTGCTTGA	ATGACGCTATACCAAATGCAGTCTAATGGTGTCAGCGCGTTCAACGCGTTTCATGCCCGCCACCGTGCTTGA			MTLYQMQSNGVSAFNAFHARHRA*	MTLYQMQSNGVSAFNAFHARHRA*			TATATATCGC	CTGCTCTGCT	0	L	0	0	0	0	0
5266	2704	an	AN2764.1	59.m09260	AO070327000027	1	-114	-58					ATGCAGTCTAATGGTGTCAGCGCGTTCAACGCGTTTCATGCCCGCCACCGTGCTTGA	ATGCAGTCTAATGGTGTCAGCGCGTTCAACGCGTTTCATGCCCGCCACCGTGCTTGA			MQSNGVSAFNAFHARHRA*	MQSNGVSAFNAFHARHRA*			GCTATACCAA	CTGCTCTGCT	0	L	0	0	0	0	0
5267	2704	ao	AN2764.1	59.m09260	AO070327000027	1					-543	-385	ATGGGGTTTTCTAGCGGGGAAGTCACGTGGAATGTGTGTCGCCGGAAGCTAACCCCGAAGAGGTCTAATGATGTATTCCCGCCCGTCGCGCGTTCTCGAAGCTCGGCGCGCGTTTGGTCGCGGTATCACTCTAGAAACCTTTTCTGTGATCTTGGTTAA			ATGGGGTTTTCTAGCGGGGAAGTCACGTGGAATGTGTGTCGCCGGAAGCTAACCCCGAAGAGGTCTAATGATGTATTCCCGCCCGTCGCGCGTTCTCGAAGCTCGGCGCGCGTTTGGTCGCGGTATCACTCTAGAAACCTTTTCTGTGATCTTGGTTAA	MGFSSGEVTWNVCRRKLTPKRSNDVFPPVARSRSSARVWSRYHSRNLFCDLG*			MGFSSGEVTWNVCRRKLTPKRSNDVFPPVARSRSSARVWSRYHSRNLFCDLG*	GGCGAAAGGA	ACCAAGGGAG	0	L	0	0	0	0	0
5268	2704	ao	AN2764.1	59.m09260	AO070327000027	1					-512	-492	ATGTGTGTCGCCGGAAGCTAA			ATGTGTGTCGCCGGAAGCTAA	MCVAGS*			MCVAGS*	GTCACGTGGA	CCCCGAAGAG	0	L	0	0	0	0	0
5269	2704	ao	AN2764.1	59.m09260	AO070327000027	1					-476	-372	ATGATGTATTCCCGCCCGTCGCGCGTTCTCGAAGCTCGGCGCGCGTTTGGTCGCGGTATCACTCTAGAAACCTTTTCTGTGATCTTGGTTAAACCAAGGGAGTAG			ATGATGTATTCCCGCCCGTCGCGCGTTCTCGAAGCTCGGCGCGCGTTTGGTCGCGGTATCACTCTAGAAACCTTTTCTGTGATCTTGGTTAAACCAAGGGAGTAG	MMYSRPSRVLEARRAFGRGITLETFSVILVKPRE*			MMYSRPSRVLEARRAFGRGITLETFSVILVKPRE*	AAGAGGTCTA	TTCTGACTGG	0	L	0	0	0	0	0
5270	2704	ao	AN2764.1	59.m09260	AO070327000027	1					-473	-372	ATGTATTCCCGCCCGTCGCGCGTTCTCGAAGCTCGGCGCGCGTTTGGTCGCGGTATCACTCTAGAAACCTTTTCTGTGATCTTGGTTAAACCAAGGGAGTAG			ATGTATTCCCGCCCGTCGCGCGTTCTCGAAGCTCGGCGCGCGTTTGGTCGCGGTATCACTCTAGAAACCTTTTCTGTGATCTTGGTTAAACCAAGGGAGTAG	MYSRPSRVLEARRAFGRGITLETFSVILVKPRE*			MYSRPSRVLEARRAFGRGITLETFSVILVKPRE*	AGGTCTAATG	TTCTGACTGG	0	L	0	0	0	0	0
5282	2715	an	AN5228.1	57.m05703	AO070337000249	1	-137	-63					ATGTCTCGTAGTCTCCAATCTTCCCTAAAACTACACCACACTACTCTACACAACTTTACATTACTACATACTTAA	ATGTCTCGTAGTCTCCAATCTTCCCTAAAACTACACCACACTACTCTACACAACTTTACATTACTACATACTTAA			MSRSLQSSLKLHHTTLHNFTLLHT*	MSRSLQSSLKLHHTTLHNFTLLHT*			CTTGCTCAGA	CTCCTGCTCC	0	CR	0	0	0	0	0
5294	2719	an	AN5925.1	72.m19206	AO070340000359	1	-545	-507					ATGCGACAAGGTTCCATTCAGCTTCGAATTCGTCATTGA	ATGCGACAAGGTTCCATTCAGCTTCGAATTCGTCATTGA			MRQGSIQLRIRH*	MRQGSIQLRIRH*			ATATTTTCCT	TTGAGCCTTG	0	A	0	0	NCU06365.1	YDR291W	0
5300	2719	an	AN5925.1	72.m19206	AO070340000359	1	-67	-32					ATGTGCTCCTTCTCTCTTCTTGCCACATTAAGTTAG	ATGTGCTCCTTCTCTCTTCTTGCCACATTAAGTTAG			MCSFSLLATLS*	MCSFSLLATLS*			ACACCCCTGC	GAAGCTCAGG	0	A	0	0	NCU06365.1	YDR291W	0
5339	2730	af	AN5175.1	69.m14872	AO070247000006	1			-161	-111			ATGGATTACACTGCTTGTCGTCGCGTCACTTTTAGGTCATTGCTTCATTAG		ATGGATTACACTGCTTGTCGTCGCGTCACTTTTAGGTCATTGCTTCATTAG		MDYTACRRVTFRSLLH*		MDYTACRRVTFRSLLH*		AGCGTCTTTA	TATTTGGCTA	0	R	0	0	0	0	0
5371	2743	ao	AN1701.1	58.m07777	AO070305000027	0					-58	-47	ATGTCCGAGTAG			ATGTCCGAGTAG	MSE*			MSE*	TATAGTTTTA	CTTCTATCTA	1	S	0	0	0	0	0
5394	2755	an	AN4645.1	57.m05476	AO070316000119	1	-226	-194					ATGCGCGGAGAACGACAAATACAGTGCAGGTGA	ATGCGCGGAGAACGACAAATACAGTGCAGGTGA			MRGERQIQCR*	MRGERQIQCR*			AGGACTAGGC	TGAGGGCTTC	0	P	0	0	NCU01356.1	0	0
5395	2755	an	AN4645.1	57.m05476	AO070316000119	1	-194	-180					ATGAGGGCTTCCTGA	ATGAGGGCTTCCTGA			MRAS*	MRAS*			AGTGCAGGTG	GTAGCGAAAA	0	P	0	0	NCU01356.1	0	0
5396	2755	an	AN4645.1	57.m05476	AO070316000119	1	-152	-6					ATGCACATAGCAACTTCTCGAGATATATTCTCAACGCGGTACTTCCGCACGCTTTTCCTAGACTCAGTACGTCAGATCCATCATTTCGAAATAATCGATAGTCATTCTTTGAGCTCCACAACTTCCATATCCTCTGGAGCTGAATGA	ATGCACATAGCAACTTCTCGAGATATATTCTCAACGCGGTACTTCCGCACGCTTTTCCTAGACTCAGTACGTCAGATCCATCATTTCGAAATAATCGATAGTCATTCTTTGAGCTCCACAACTTCCATATCCTCTGGAGCTGAATGA			MHIATSRDIFSTRYFRTLFLDSVRQIHHFEIIDSHSLSSTTSISSGAE*	MHIATSRDIFSTRYFRTLFLDSVRQIHHFEIIDSHSLSSTTSISSGAE*			GTTGCTGGGA	ACATAATGCT	0	P	0	0	NCU01356.1	0	0
5397	2755	af	AN4645.1	57.m05476	AO070316000119	1			-590	-555			ATGAGCCACTGCCCGTTCAACGAGTTGGCTACCTAG		ATGAGCCACTGCCCGTTCAACGAGTTGGCTACCTAG		MSHCPFNELAT*		MSHCPFNELAT*		ACTGGAATAC	TTGCCGTCCA	0	P	0	0	NCU01356.1	0	0
5398	2755	af	AN4645.1	57.m05476	AO070316000119	1			-530	-489			ATGTCTAGTTTCCCACCCTTGTCACTCGCTTCTCTGCAGTGA		ATGTCTAGTTTCCCACCCTTGTCACTCGCTTCTCTGCAGTGA		MSSFPPLSLASLQ*		MSSFPPLSLASLQ*		TTACCTCGCT	GTTTAAACTG	0	P	0	0	NCU01356.1	0	0
5399	2755	ao	AN4645.1	57.m05476	AO070316000119	1					-573	-562	ATGCGTGCATGA			ATGCGTGCATGA	MRA*			MRA*	TGTGGGGAGA	GGGTAGTTGG	0	P	0	0	NCU01356.1	0	0
5400	2755	ao	AN4645.1	57.m05476	AO070316000119	1					-565	-440	ATGAGGGTAGTTGGCGAGGCCTTGGGCTTTTTCAGGTGGGAGGAAGAAGGCCGAACCGTTGGACATGTTGAGAATGATCGAATTAAAATTACCACTAGGGCTGTATCTGGAGGTTTTAGGCGATAA			ATGAGGGTAGTTGGCGAGGCCTTGGGCTTTTTCAGGTGGGAGGAAGAAGGCCGAACCGTTGGACATGTTGAGAATGATCGAATTAAAATTACCACTAGGGCTGTATCTGGAGGTTTTAGGCGATAA	MRVVGEALGFFRWEEEGRTVGHVENDRIKITTRAVSGGFRR*			MRVVGEALGFFRWEEEGRTVGHVENDRIKITTRAVSGGFRR*	GAATGCGTGC	ATCAATTTAA	0	P	0	0	NCU01356.1	0	0
5401	2755	ao	AN4645.1	57.m05476	AO070316000119	1					-501	-430	ATGTTGAGAATGATCGAATTAAAATTACCACTAGGGCTGTATCTGGAGGTTTTAGGCGATAAATCAATTTAA			ATGTTGAGAATGATCGAATTAAAATTACCACTAGGGCTGTATCTGGAGGTTTTAGGCGATAAATCAATTTAA	MLRMIELKLPLGLYLEVLGDKSI*			MLRMIELKLPLGLYLEVLGDKSI*	ACCGTTGGAC	AAAAGGCGGG	0	P	0	0	NCU01356.1	0	0
5402	2755	ao	AN4645.1	57.m05476	AO070316000119	1					-492	-430	ATGATCGAATTAAAATTACCACTAGGGCTGTATCTGGAGGTTTTAGGCGATAAATCAATTTAA			ATGATCGAATTAAAATTACCACTAGGGCTGTATCTGGAGGTTTTAGGCGATAAATCAATTTAA	MIELKLPLGLYLEVLGDKSI*			MIELKLPLGLYLEVLGDKSI*	CATGTTGAGA	AAAAGGCGGG	0	P	0	0	NCU01356.1	0	0
5438	2761	af	AN8056.1	53.m03887	AO070322000144	1			-82	-68			ATGAGATGCAAATGA		ATGAGATGCAAATGA		MRCK*		MRCK*		ACAGCAATAA	CTGTCTGAGA	0	BD	0	MG08841.1	0	0	0
5439	2761	af	AN8056.1	53.m03887	AO070322000144	1			-77	-60			ATGCAAATGACTGTCTGA		ATGCAAATGACTGTCTGA		MQMTV*		MQMTV*		AATAAATGAG	GATGACCTAA	0	BD	0	MG08841.1	0	0	0
5440	2761	af	AN8056.1	53.m03887	AO070322000144	1			-71	-60			ATGACTGTCTGA		ATGACTGTCTGA		MTV*		MTV*		TGAGATGCAA	GATGACCTAA	0	BD	0	MG08841.1	0	0	0
5441	2761	ao	AN8056.1	53.m03887	AO070322000144	1					-99	-85	ATGACACGATTTTGA			ATGACACGATTTTGA	MTRF*			MTRF*	AATCTATGCT	GATGTTATCT	0	BD	0	MG08841.1	0	0	0
5442	2761	ao	AN8056.1	53.m03887	AO070322000144	1					-83	-69	ATGTTATCTGACTGA			ATGTTATCTGACTGA	MLSD*			MLSD*	CGATTTTGAG	CTTATGCGAC	0	BD	0	MG08841.1	0	0	0
5443	2761	ao	AN8056.1	53.m03887	AO070322000144	1					-65	-45	ATGCGACAACTCCTTACTTGA			ATGCGACAACTCCTTACTTGA	MRQLLT*			MRQLLT*	TGACTGACTT	CCGACACATT	0	BD	0	MG08841.1	0	0	0
5450	2762	ao	AN1735.1	69.m15034	AO070324000065	0					-33	-10	ATGACTCTTTTTCTTCCAGAGTAA			ATGACTCTTTTTCTTCCAGAGTAA	MTLFLPE*			MTLFLPE*	AACTCTTTAG	AGCGCGACAA	1	F	0	0	0	0	0
5453	2764	af	AN7751.1	71.m15782	AO070325000182	0			-59	-45			ATGCTTCGCAGGTGA		ATGCTTCGCAGGTGA		MLRR*		MLRR*		GTTTATATCA	CGCCCATAGA	1	I	0	0	0	0	0
5456	2764	ao	AN7751.1	71.m15782	AO070325000182	0					-59	-45	ATGCTCTATCAGTGA			ATGCTCTATCAGTGA	MLYQ*			MLYQ*	AATTCCCCTG	TATCTCAATT	1	I	0	0	0	0	0
5460	2766	an	AN4836.1	59.m09142	AO070327000142	1	-235	-161					ATGTCCAGGATCTTTACCGTCGCGGCTCTCCCACTACCCACCCGAACGCCGACGAGGTCGAGCTTCAGAATCTAG	ATGTCCAGGATCTTTACCGTCGCGGCTCTCCCACTACCCACCCGAACGCCGACGAGGTCGAGCTTCAGAATCTAG			MSRIFTVAALPLPTRTPTRSSFRI*	MSRIFTVAALPLPTRTPTRSSFRI*			TCCTCTATCC	CATGCAGGAT	0	P	0	0	0	0	0
5461	2766	an	AN4836.1	59.m09142	AO070327000142	1	-159	-142					ATGCAGGATCAGAGATAA	ATGCAGGATCAGAGATAA			MQDQR*	MQDQR*			AGAATCTAGC	ATCACAAACA	0	P	0	0	0	0	0
5462	2766	af	AN4836.1	59.m09142	AO070327000142	1			-245	-198			ATGTACCTACAGTTAGGCTGCAAAAGACGCGAAGAAAAGAGCTGCTAG		ATGTACCTACAGTTAGGCTGCAAAAGACGCGAAGAAAAGAGCTGCTAG		MYLQLGCKRREEKSC*		MYLQLGCKRREEKSC*		TCAAGATCGG	CCTTTTCCAT	0	P	0	0	0	0	0
5463	2766	af	AN4836.1	59.m09142	AO070327000142	1			-189	-160			ATGATCCCCCAGTCCCTGGACTATTATTAG		ATGATCCCCCAGTCCCTGGACTATTATTAG		MIPQSLDYY*		MIPQSLDYY*		AGCCTTTTCC	CCGACCTCCG	0	P	0	0	0	0	0
5464	2766	ao	AN4836.1	59.m09142	AO070327000142	1					-232	-221	ATGCAGAATTGA			ATGCAGAATTGA	MQN*			MQN*	ATCGACTAGT	CCAGGGGCCA	0	P	0	0	0	0	0
5466	2767	ao	AN4834.1	59.m09144	AO070327000147	0					-35		ATGTTTTCTGCGGATCAAATTCCTCCAATCGCATGA			ATGTTTTCTGCGGATCAAATTCCTCCAATCGCATGA	MFSADQIPPIA*			MFSADQIPPIA*	TCTGCGCCGT	TGCAGTCCAG	1		0	0	0	0	0
5469	2768	af	AN3634.1	58.m07467	AO070328000078	1			-119	-54			ATGACTCCTCCGGTGATACAAGCTGAGGGGCTGTTTGCTACTTCCACCTTCCTTTGTCATTGCTGA		ATGACTCCTCCGGTGATACAAGCTGAGGGGCTGTTTGCTACTTCCACCTTCCTTTGTCATTGCTGA		MTPPVIQAEGLFATSTFLCHC*		MTPPVIQAEGLFATSTFLCHC*		CCGAGTGCCG	CATTTGGAGT	0	E	FG00598.1	MG05168.1	NCU04411.1	0	0
5470	2768	ao	AN3634.1	58.m07467	AO070328000078	1					-122	-105	ATGACGGATTCTATATGA			ATGACGGATTCTATATGA	MTDSI*			MTDSI*	GCCTACGCCG	GGGGTGCATT	0	E	FG00598.1	MG05168.1	NCU04411.1	0	0
5471	2768	ao	AN3634.1	58.m07467	AO070328000078	1					-108	-91	ATGAGGGGTGCATTTTGA			ATGAGGGGTGCATTTTGA	MRGAF*			MRGAF*	CGGATTCTAT	GTCAGAGATT	0	E	FG00598.1	MG05168.1	NCU04411.1	0	0
5480	2774	af	AN3498.1	58.m07225	AO070333000036	0			-60	-43			ATGGACTCGGGCGTCTGA		ATGGACTCGGGCGTCTGA		MDSGV*		MDSGV*		CGGCCTTTGA	ATCTTTCACC	1	R	0	0	0	0	0
5506	2778	ao	AN3061.1	59.m08953	AO070337000012	1					-198	-178	ATGGGTCCGGCTTTTGTCTAG			ATGGGTCCGGCTTTTGTCTAG	MGPAFV*			MGPAFV*	CTGGAGTCGA	TCTTTATCTG	0	O	FG10964.1	0	NCU06942.1	YPR173C	0
5509	2780	af	AN5216.1	69.m14914	AO070337000263	0			-60	-25			ATGTTGCCTTTTATGCCAGATATTTCTTGGCAATAG		ATGTTGCCTTTTATGCCAGATATTTCTTGGCAATAG		MLPFMPDISWQ*		MLPFMPDISWQ*		TACATCAGCT	TATCGCTTCA	1	L	0	0	0	0	0
5510	2780	af	AN5216.1	69.m14914	AO070337000263	0			-48	-25			ATGCCAGATATTTCTTGGCAATAG		ATGCCAGATATTTCTTGGCAATAG		MPDISWQ*		MPDISWQ*		GTTGCCTTTT	TATCGCTTCA	1	L	0	0	0	0	0
5513	2780	ao	AN5216.1	69.m14914	AO070337000263	0					-56	-33	ATGTCGTCGAGAGTACTACTATGA			ATGTCGTCGAGAGTACTACTATGA	MSSRVLL*			MSSRVLL*	TCACAAGGTC	CGCAACCTTA	1	L	0	0	0	0	0
5514	2780	ao	AN5216.1	69.m14914	AO070337000263	0					-36	-22	ATGACGCAACCTTAG			ATGACGCAACCTTAG	MTQP*			MTQP*	GAGTACTACT	ATCCGCCATT	1	L	0	0	0	0	0
5516	2782	an	AN2872.1	59.m08720	AO070338000142	0	-47	-18					ATGCCAATCACCGACACCTCTGAAATTTGA	ATGCCAATCACCGACACCTCTGAAATTTGA			MPITDTSEI*	MPITDTSEI*			AAAATCCCCA	CAGATTTATC	1		0	0	0	0	0
5528	2789	an	AN2090.1	57.m05792	AO070341000248	0	-55	-29					ATGCTGCTAGATCGAACCCATCACTAA	ATGCTGCTAGATCGAACCCATCACTAA			MLLDRTHH*	MLLDRTHH*			TCCAAGGGTG	CAAACTCCAT	1	R	0	0	0	YPL263C	0
5531	2794	an	AN7443.1	57.m05901	AO070229000015	1	-46	-23					ATGCGGTTTCGCCTGAGATCATAA	ATGCGGTTTCGCCTGAGATCATAA			MRFRLRS*	MRFRLRS*			TAAGGACCTC	ATTACAACCC	1		0	0	0	0	0
5532	2794	ao	AN7443.1	57.m05901	AO070229000015	1					-47	-21	ATGTTGGCACTTGAACTTAAGTATTAG			ATGTTGGCACTTGAACTTAAGTATTAG	MLALELKY*			MLALELKY*	AACACGTTTG	AAAAGATTGT	1		0	0	0	0	0
5535	2801	an	AN1660.1	58.m08995	AO070299000020	0	-48	-4					ATGTTCCGTTTTCTCTCCTCCTTCTACCACTGCTTCTTGTCTTGA	ATGTTCCGTTTTCTCTCCTCCTTCTACCACTGCTTCTTGTCTTGA			MFRFLSSFYHCFLS*	MFRFLSSFYHCFLS*			CCGTCTCGCA	ACTATGGTTG	1	RP	0	0	0	0	0
5542	2802	an	AN1665.1	58.m07733	AO070299000047	0	-57	-7					ATGGTTACGGGCTTTTACCCTCTTGCCTTATTGGGAGATATGCCGCCTTGA	ATGGTTACGGGCTTTTACCCTCTTGCCTTATTGGGAGATATGCCGCCTTGA			MVTGFYPLALLGDMPP*	MVTGFYPLALLGDMPP*			TAAATCTCTC	TTGATAATGG	1	T	FG07520.1	MG00700.1	0	YJL057C	0
5543	2802	an	AN1665.1	58.m07733	AO070299000047	0	-18	-7					ATGCCGCCTTGA	ATGCCGCCTTGA			MPP*	MPP*			ATTGGGAGAT	TTGATAATGG	1	T	FG07520.1	MG00700.1	0	YJL057C	0
5548	2802	ao	AN1665.1	58.m07733	AO070299000047	0					-53	-24	ATGATATTCTCTTGTTCCCCTAATTCTTGA			ATGATATTCTCTTGTTCCCCTAATTCTTGA	MIFSCSPNS*			MIFSCSPNS*	CTCTTCGAGA	GATGCGCGTG	1	T	FG07520.1	MG00700.1	0	YJL057C	0
5549	2804	conserved	AN4460.1	58.m07864	AO070305000133	0	-52	-41	-49	-38	-51	-40	ATGGCGCGmTAr	ATGGCGCGCTAA	ATGGCGCGCTAG	ATGGCGCGATAG	MAR*	MAR*	MAR*	MAR*	krkwyrkrks	wwhbywyrsm	1	A	FG06788.1	0	NCU03628.1	0	0
5552	2804	af	AN4460.1	58.m07864	AO070305000133	0			-52	-38			ATGATGGCGCGCTAG		ATGATGGCGCGCTAG		MMAR*		MMAR*		TTCTGGACGT	TTCTCTTGCA	1	A	FG06788.1	0	NCU03628.1	0	0
5585	2820	ao	AN0756.1	70.m15358	AO070343000444	0					-51	-34	ATGGGAAATCTGCTGTAA			ATGGGAAATCTGCTGTAA	MGNLL*			MGNLL*	CCCCCGAAAC	GCTCTCACTG	1	G	0	0	0	0	0
5599	2827	an	AN2015.1	58.m07623	AO070202000008	1	-70	-56					ATGCGTATGCGATAG	ATGCGTATGCGATAG			MRMR*	MRMR*			AGCGCTCGCG	TGTCGTATTC	0	G	0	0	0	0	0
5600	2827	af	AN2015.1	58.m07623	AO070202000008	1			-123	-7			ATGGTCGGTCGGGATGTACATGCTGTTGTCGACACGGTAATCGGTTTCTGTCTCTATCGTCGCTGGTTAATCGAGCTTGGGTTTGAACGAGGGAAAGCGGAACACATACAGGAATAA		ATGGTCGGTCGGGATGTACATGCTGTTGTCGACACGGTAATCGGTTTCTGTCTCTATCGTCGCTGGTTAATCGAGCTTGGGTTTGAACGAGGGAAAGCGGAACACATACAGGAATAA		MVGRDVHAVVDTVIGFCLYRRWLIELGFERGKAEHIQE*		MVGRDVHAVVDTVIGFCLYRRWLIELGFERGKAEHIQE*		CAGTTTCTTC	ACTCAAATGT	0	G	0	0	0	0	0
5601	2827	af	AN2015.1	58.m07623	AO070202000008	1			-110	-84			ATGTACATGCTGTTGTCGACACGGTAA		ATGTACATGCTGTTGTCGACACGGTAA		MYMLLSTR*		MYMLLSTR*		GTCGGTCGGG	TCGGTTTCTG	0	G	0	0	0	0	0
5602	2827	af	AN2015.1	58.m07623	AO070202000008	1			-104	-84			ATGCTGTTGTCGACACGGTAA		ATGCTGTTGTCGACACGGTAA		MLLSTR*		MLLSTR*		CGGGATGTAC	TCGGTTTCTG	0	G	0	0	0	0	0
5603	2827	ao	AN2015.1	58.m07623	AO070202000008	1					-89	-63	ATGATCGAGATGCTTATGCTTTTCTAG			ATGATCGAGATGCTTATGCTTTTCTAG	MIEMLMLF*			MIEMLMLF*	GCCGTGCTGG	TGCGGTACCT	0	G	0	0	0	0	0
5604	2827	ao	AN2015.1	58.m07623	AO070202000008	1					-80	-63	ATGCTTATGCTTTTCTAG			ATGCTTATGCTTTTCTAG	MLMLF*			MLMLF*	GATGATCGAG	TGCGGTACCT	0	G	0	0	0	0	0
5605	2827	ao	AN2015.1	58.m07623	AO070202000008	1					-74	-63	ATGCTTTTCTAG			ATGCTTTTCTAG	MLF*			MLF*	CGAGATGCTT	TGCGGTACCT	0	G	0	0	0	0	0
5616	2833	af	AN6911.1	71.m15221	AO070219000015	0			-23				ATGAATACAAGTAAACACAATTAA		ATGAATACAAGTAAACACAATTAA		MNTSKHN*		MNTSKHN*		CTTTTTATTA	TGGCGCCATC	1	U	0	0	0	0	0
5626	2838	af	AN4316.1	58.m08008	AO070230000004	0			-33	-4			ATGTCTAGCGGTGGAAAGAAAGAAGCTTAA		ATGTCTAGCGGTGGAAAGAAAGAAGCTTAA		MSSGGKKEA*		MSSGGKKEA*		TATACTACCA	GCGATGAATC	1	R	0	0	0	0	0
5687	2862	conserved	AN1341.1	70.m15733	AO070247000023	1	-31	-20	-46	-35	-34	-23	ATGGGCyGTTGA	ATGGGCCGTTGA	ATGGGCCGTTGA	ATGGGCTGTTGA	MGr*	MGR*	MGR*	MGC*	TkdyyTTGGA	vyyvyymrhw	1	U	FG01552.1	0	0	0	0
5690	2866	an	AN5783.1	69.m14814	AO070249000028	1	-217	-65					ATGAATATCCCTTGTCCATCCTTTCTATATCTGCGATGTAATAGTCTGAGAGATTATATTACCCATCATCTATACTTCTACTGCAACATTGATATCGGACATCAGCTTTCCCAGGGACTATTTGGAAATGATGCTGGGACTTGGGAATTATGA	ATGAATATCCCTTGTCCATCCTTTCTATATCTGCGATGTAATAGTCTGAGAGATTATATTACCCATCATCTATACTTCTACTGCAACATTGATATCGGACATCAGCTTTCCCAGGGACTATTTGGAAATGATGCTGGGACTTGGGAATTATGA			MNIPCPSFLYLRCNSLRDYITHHLYFYCNIDIGHQLSQGLFGNDAGTWEL*	MNIPCPSFLYLRCNSLRDYITHHLYFYCNIDIGHQLSQGLFGNDAGTWEL*			CTCTGCCTTA	AAGCAGTAGT	0	O	0	0	0	0	0
5691	2866	af	AN5783.1	69.m14814	AO070249000028	1			-289	-248			ATGATTTTAATGGTAGTTATGGTGAAGGACAACATGCTTTGA		ATGATTTTAATGGTAGTTATGGTGAAGGACAACATGCTTTGA		MILMVVMVKDNML*		MILMVVMVKDNML*		TTCTGATCTC	ATGGATTGAC	0	O	0	0	0	0	0
5692	2866	af	AN5783.1	69.m14814	AO070249000028	1			-280	-248			ATGGTAGTTATGGTGAAGGACAACATGCTTTGA		ATGGTAGTTATGGTGAAGGACAACATGCTTTGA		MVVMVKDNML*		MVVMVKDNML*		CATGATTTTA	ATGGATTGAC	0	O	0	0	0	0	0
5693	2866	af	AN5783.1	69.m14814	AO070249000028	1			-271	-248			ATGGTGAAGGACAACATGCTTTGA		ATGGTGAAGGACAACATGCTTTGA		MVKDNML*		MVKDNML*		AATGGTAGTT	ATGGATTGAC	0	O	0	0	0	0	0
5694	2866	ao	AN5783.1	69.m14814	AO070249000028	1					-448	-401	ATGAGTACTCAAAGGCAACTGTATATATCTAGTATTCGTGGAGTTTAA			ATGAGTACTCAAAGGCAACTGTATATATCTAGTATTCGTGGAGTTTAA	MSTQRQLYISSIRGV*			MSTQRQLYISSIRGV*	ATCGTAATCC	CAAAGGAGCA	0	O	0	0	0	0	0
5701	2868	af	AN8745.1	62.m03335	AO070250000030	0			-59	-9			ATGATACAAGACTTGGTTTCTTTATATTTAAAATCGGCACCCTATAAGTGA		ATGATACAAGACTTGGTTTCTTTATATTTAAAATCGGCACCCTATAAGTGA		MIQDLVSLYLKSAPYK*		MIQDLVSLYLKSAPYK*		TCCTTCATAT	CCCGCGCAAT	1	G	0	0	0	0	0
5716	2870	af	AN7201.1	69.m15184	AO070252000010	0			-59	-30			ATGAAGCGGTTCCCCAGGCCGTCTTGCTAG		ATGAAGCGGTTCCCCAGGCCGTCTTGCTAG		MKRFPRPSC*		MKRFPRPSC*		AAACATTTAT	GTACACACAA	1	O	0	0	0	0	0
5741	2876	af	AN3153.1	59.m08513	AO070256000033	1			-72	-4			ATGAAACCTCCAAGCTACCTACATTTGTTGAATAGCTTTCCAATTCATCAAAAGCGTCAAACTCCTTAA		ATGAAACCTCCAAGCTACCTACATTTGTTGAATAGCTTTCCAATTCATCAAAAGCGTCAAACTCCTTAA		MKPPSYLHLLNSFPIHQKRQTP*		MKPPSYLHLLNSFPIHQKRQTP*		CTTTCAGCAT	ACAATGTCAC	0	BK	0	0	0	0	0
5775	2892	an	AN7663.1	57.m05430	AO070268000034	0	-32	-21					ATGATTCTCTGA	ATGATTCTCTGA			MIL*	MIL*			CAACTGGCTA	AAAACAACAA	1	C	0	0	0	0	0
5778	2892	af	AN7663.1	57.m05430	AO070268000034	0			-57	-40			ATGGAGGACAAGCCGTAG		ATGGAGGACAAGCCGTAG		MEDKP*		MEDKP*		GACAACTCCC	CCCTAGTATA	1	C	0	0	0	0	0
5806	2899	an	AN6546.1	62.m03127	AO070270000039	1	-159	-148					ATGATTGAGTAG	ATGATTGAGTAG			MIE*	MIE*			GATTAATCTG	ATTGGTCGAG	0	T	0	0	0	0	0
5807	2899	an	AN6546.1	62.m03127	AO070270000039	1	-103	-35					ATGCAGTCGCTTGCTTTCCGCACAAGACAGTCCTACAACAACTTCCTTTGCCCGCTGCCCGCTGCCTGA	ATGCAGTCGCTTGCTTTCCGCACAAGACAGTCCTACAACAACTTCCTTTGCCCGCTGCCCGCTGCCTGA			MQSLAFRTRQSYNNFLCPLPAA*	MQSLAFRTRQSYNNFLCPLPAA*			GAGGAGTTAT	AGCTTGAGCT	0	T	0	0	0	0	0
5808	2899	af	AN6546.1	62.m03127	AO070270000039	1			-137	-114			ATGCAGACAAAACAGTCCCTGTGA		ATGCAGACAAAACAGTCCCTGTGA		MQTKQSL*		MQTKQSL*		GACCGTCTCG	TTTAGATCAT	0	T	0	0	0	0	0
5809	2899	ao	AN6546.1	62.m03127	AO070270000039	1					-140	-117	ATGCTGAAGGAGCGTTGTCTATAA			ATGCTGAAGGAGCGTTGTCTATAA	MLKERCL*			MLKERCL*	CAACGTCTCC	ATCAAGCTTC	0	T	0	0	0	0	0
5860	2922	ao	AN1133.1	71.m15635	AO070276000007	1					-50	-33	ATGCTGCACTTTTCCTAG			ATGCTGCACTTTTCCTAG	MLHFS*			MLHFS*	ATCGACGTGC	AATAGTCAAC	1	T	FG09422.1	MG03089.1	NCU02463.1	0	0
5861	2923	an	AN8820.1	71.m15631	AO070276000022	1	-315	-289					ATGCTTCTCGAGCAGCCTATCGCGTGA	ATGCTTCTCGAGCAGCCTATCGCGTGA			MLLEQPIA*	MLLEQPIA*			GCGACAGAAC	TCAACAAGAG	0	R	0	0	0	0	0
5864	2924	an	AN8810.1	71.m15616	AO070276000047	1	-45	-31					ATGCTTCCTCTTTGA	ATGCTTCCTCTTTGA			MLPL*	MLPL*			TAATAAACTG	AGTGACAGTT	1		FG06805.1	0	0	YHR045W	0
5867	2924	ao	AN8810.1	71.m15616	AO070276000047	0					-35	-12	ATGACGACGTATTGTCGATCATAA			ATGACGACGTATTGTCGATCATAA	MTTYCRS*			MTTYCRS*	CACATCCTAC	GTAAACCAAA	1		FG06805.1	0	0	YHR045W	0
5875	2926	ao	AN8283.1	65.m07459	AO070277000005	0					-52	-20	ATGTCATTATTCCCCCTTTCGTCTACCTGTTGA			ATGTCATTATTCCCCCTTTCGTCTACCTGTTGA	MSLFPLSSTC*			MSLFPLSSTC*	TTTCCTTTTC	CCCCTACTGT	1	Q	0	MG04432.1	0	0	0
5883	2930	an	AN7354.1	72.m19725	AO070278000046	0	-20	-3					ATGCTAACAATTGCGTGA	ATGCTAACAATTGCGTGA			MLTIA*	MLTIA*			AGGTTCATTG	AGATGGTCCT	1	J	0	MG05248.1	0	0	0
5884	2930	af	AN7354.1	72.m19725	AO070278000046	0			-56	-30			ATGTTCATTCTGCATATTTGCGTCTGA		ATGTTCATTCTGCATATTTGCGTCTGA		MFILHICV*		MFILHICV*		CCGACAAGGT	TGCATTGAGG	1	J	0	MG05248.1	0	0	0
5886	2930	ao	AN7354.1	72.m19725	AO070278000046	0					-55	-44	ATGCCGGGATGA			ATGCCGGGATGA	MPG*			MPG*	GGTATGTTCT	TGGCTTTATA	1	J	0	MG05248.1	0	0	0
5887	2930	ao	AN7354.1	72.m19725	AO070278000046	0					-47	-18	ATGATGGCTTTATATTGTCGTTATTCTTGA			ATGATGGCTTTATATTGTCGTTATTCTTGA	MMALYCRYS*			MMALYCRYS*	CTATGCCGGG	TACTAATTGG	1	J	0	MG05248.1	0	0	0
5888	2930	ao	AN7354.1	72.m19725	AO070278000046	0					-44	-18	ATGGCTTTATATTGTCGTTATTCTTGA			ATGGCTTTATATTGTCGTTATTCTTGA	MALYCRYS*			MALYCRYS*	TGCCGGGATG	TACTAATTGG	1	J	0	MG05248.1	0	0	0
5891	2931	af	AN6364.1	72.m19496	AO070279000050	0			-53	-36			ATGTTCTGGATGCAATAG		ATGTTCTGGATGCAATAG		MFWMQ*		MFWMQ*		TGGCTGCGTG	CTGTCATTTA	1	D	0	MG04988.1	NCU07554.1	YJL074C	YJL074C
5892	2931	ao	AN6364.1	72.m19496	AO070279000050	0					-55	-29	ATGATCTGGTTGTTGTGCCTGCCATAA			ATGATCTGGTTGTTGTGCCTGCCATAA	MIWLLCLP*			MIWLLCLP*	CGGTCGCGTG	CTTCCCGTGT	1	D	0	MG04988.1	NCU07554.1	YJL074C	YJL074C
5898	2939	an	AN1069.1	70.m15145	AO070285000067	0	-60	-43					ATGACCAGAGTTCATTGA	ATGACCAGAGTTCATTGA			MTRVH*	MTRVH*			GGGGAACTGC	TCGAGTCGAG	1		0	0	0	0	0
5955	2961	af	AN8877.1	56.m03107	AO070293000006	0			-46	-2			ATGGCATACTACGACGCTCGGTCACACACGGAGCAACTCGTCTGA		ATGGCATACTACGACGCTCGGTCACACACGGAGCAACTCGTCTGA		MAYYDARSHTEQLV*		MAYYDARSHTEQLV*		TGGATGTCCG	AATGGAGGGC	1	T	0	0	NCU03264.1	0	0
5963	2962	an	AN8896.1	56.m02307	AO070293000029	0	-56	-33					ATGCCACCTGATTACTCTTCCTAG	ATGCCACCTGATTACTCTTCCTAG			MPPDYSS*	MPPDYSS*			CAATCTAGTC	TTTTCGCATC	1	Q	0	0	0	0	0
6012	2970	af	AN4336.1	70.m15045	AO070295000006	0			-45	-31			ATGGAGCCTGATTGA		ATGGAGCCTGATTGA		MEPD*		MEPD*		CGATTCCAGA	TCACCAAACT	1	Q	0	MG01231.1	NCU00643.1	0	0
6079	2990	an	AN1965.1	58.m07570	AO070301000046	1	-136	-104					ATGGTTATATCCAGGTCTTTGCAGCTGCTCTAG	ATGGTTATATCCAGGTCTTTGCAGCTGCTCTAG			MVISRSLQLL*	MVISRSLQLL*			TCGACACTGC	CATCACTCTA	0	FE	0	MG07148.1	0	0	0
6081	2990	af	AN1965.1	58.m07570	AO070301000046	1			-144	-121			ATGACTCTACGTCTCTTCTTCTGA		ATGACTCTACGTCTCTTCTTCTGA		MTLRLFF*		MTLRLFF*		GTTCCCTGAC	ATATACATTC	0	FE	0	MG07148.1	0	0	0
6082	2990	ao	AN1965.1	58.m07570	AO070301000046	1					-152	-120	ATGTATCACCTTTTGTTTGACTCTGGGGTTTGA			ATGTATCACCTTTTGTTTGACTCTGGGGTTTGA	MYHLLFDSGV*			MYHLLFDSGV*	CGGGGCATTT	TTGTCCTCAG	0	FE	0	MG07148.1	0	0	0
6098	2992	an	AN1970.1	58.m07575	AO070301000054	0	-59	-42					ATGCTCCAGCTTGTTTGA	ATGCTCCAGCTTGTTTGA			MLQLV*	MLQLV*			TGACCTTGCC	GACTCTATTC	1	J	0	0	0	0	0
6102	2992	af	AN1970.1	58.m07575	AO070301000054	0			-40	-14			ATGCCATTGCTCATGCAGTTTCTATAA		ATGCCATTGCTCATGCAGTTTCTATAA		MPLLMQFL*		MPLLMQFL*		TCCTACTGTC	CTTGATTATC	1	J	0	0	0	0	0
6103	2992	af	AN1970.1	58.m07575	AO070301000054	0			-28	-14			ATGCAGTTTCTATAA		ATGCAGTTTCTATAA		MQFL*		MQFL*		GCCATTGCTC	CTTGATTATC	1	J	0	0	0	0	0
6107	2992	ao	AN1970.1	58.m07575	AO070301000054	0					-35	-9	ATGGTCGATACGATATCGACCTTTTGA			ATGGTCGATACGATATCGACCTTTTGA	MVDTISTF*			MVDTISTF*	TTTCCCTGTC	TCAAGACAAT	1	J	0	0	0	0	0
6109	2993	af	AN1971.1	58.m07576	AO070301000055	1			-107	-81			ATGACCCTCCTTCGCAACCCTTTCTAA		ATGACCCTCCTTCGCAACCCTTTCTAA		MTLLRNPF*		MTLLRNPF*		TTTCCTTTGC	TACCTGATCA	0	L	0	0	0	YDR190C	YDR190C
6125	3008	af	AN6256.1	72.m19400	AO070304000032	1			-45	-34			ATGGCTCAATAA		ATGGCTCAATAA		MAQ*		MAQ*		CGGTTCTCAT	TCAGTCTCAT	1	O	0	MG01109.1	NCU06739.1	0	0
6126	3008	ao	AN6256.1	72.m19400	AO070304000032	1					-55	-44	ATGGTGCGATAA			ATGGTGCGATAA	MVR*			MVR*	CTACAACTCT	GCTCTCCGGC	1	O	0	MG01109.1	NCU06739.1	0	0
6140	3017	ao	AN4464.1	58.m07849	AO070305000118	1					-179	-42	ATGTTGTTGTGGTTCTTGTTCCCCGGGTGTGCCCCTCCGACTGCTTGCAGTGTTGATTGTGGAGGGGTCGTGGGGATAAATTTTTCCCCTCCTTCAATTTTCTTTTCCCTTCCTTTTTCTTGTCTTTCTGGTCCCTGA			ATGTTGTTGTGGTTCTTGTTCCCCGGGTGTGCCCCTCCGACTGCTTGCAGTGTTGATTGTGGAGGGGTCGTGGGGATAAATTTTTCCCCTCCTTCAATTTTCTTTTCCCTTCCTTTTTCTTGTCTTTCTGGTCCCTGA	MLLWFLFPGCAPPTACSVDCGGVVGINFSPPSIFFSLPFSCLSGP*			MLLWFLFPGCAPPTACSVDCGGVVGINFSPPSIFFSLPFSCLSGP*	CTTCCCTTCG	CCTTGACGTG	0	F	0	MG04435.1	NCU02629.1	0	0
6221	3048	conserved	AN1014.1	70.m15232	AO070312000004	1	-67	-41	-120	-94	-73	-47	ATGTTvbCyywmGyyGAyyCyGGmTrr	ATGTTGCCTTACGTTGATTCCGGATAA	ATGTTCGCCTTCGCCGACCCTGGATAG	ATGTTATCCCAAGTTGACTCTGGCTGA	MlpyvDsG*	MLPYVDSG*	MFAFADPG*	MLSQVDSG*	bhbbmTrGhy	wvyywwwwby	0	I	0	0	NCU01751.1	YKL188C	YKL188C
6227	3048	ao	AN1014.1	70.m15232	AO070312000004	1					-79	-47	ATGGCCATGTTATCCCAAGTTGACTCTGGCTGA			ATGGCCATGTTATCCCAAGTTGACTCTGGCTGA	MAMLSQVDSG*			MAMLSQVDSG*	AATCCGCTTC	AATTAATTCT	0	I	0	0	NCU01751.1	YKL188C	YKL188C
6232	3051	ao	AN2500.1	59.m09384	AO070312000055	0					-56	-21	ATGACAATTTTGCACCACCTGATCCCCCGTGAATAG			ATGACAATTTTGCACCACCTGATCCCCCGTGAATAG	MTILHHLIPRE*			MTILHHLIPRE*	TCTGGTTCGA	GGGGCGCGAC	1	R	0	0	0	YLR285W	YLR285W
6233	3053	af	AN6920.1	71.m15192	AO070313000059	1			-141	-127			ATGCTTTTGCGATAA		ATGCTTTTGCGATAA		MLLR*		MLLR*		ACACAACTTG	CGTAGCCTTG	0	U	0	0	0	0	0
6271	3060	an	AN6841.1	71.m15298	AO070314000098	0	-43	-32					ATGACGACCTGA	ATGACGACCTGA			MTT*	MTT*			AAAGAATGAA	AGCATACAAT	1	O	0	0	0	YMR150C	YMR150C
6300	3071	ao	AN8698.1	62.m03470	AO070315000125	1					-52	-35	ATGGTACCAGCGGAGTAA			ATGGTACCAGCGGAGTAA	MVPAE*			MVPAE*	TAAGTTGTTG	CAACGGAGAC	1	Z	0	0	0	0	0
6329	3083	an	AN0633.1	70.m15649	AO070318000123	1	-338	-303					ATGGCACGTCAGACCATTGTCCATTCCTTCTCCTAA	ATGGCACGTCAGACCATTGTCCATTCCTTCTCCTAA			MARQTIVHSFS*	MARQTIVHSFS*			CCTTCCCCTC	TGTAACGACG	0		0	0	0	0	0
6330	3083	an	AN0633.1	70.m15649	AO070318000123	1	-286	-224					ATGGCTGTCCAGTTACCTCCCCGTCGCTCGAGGGTAGTACTGGTCTCCGGTTTTTGGCTTTAA	ATGGCTGTCCAGTTACCTCCCCGTCGCTCGAGGGTAGTACTGGTCTCCGGTTTTTGGCTTTAA			MAVQLPPRRSRVVLVSGFWL*	MAVQLPPRRSRVVLVSGFWL*			GACGTCTCTC	CTTCTCTGTT	0		0	0	0	0	0
6331	3083	af	AN0633.1	70.m15649	AO070318000123	1			-198	-88			ATGGCCAAACCCAAACCCAAACCCCCAATCCGAGCCTCCATAAACTCCCCTCATGTAATCACTACTGATCAGATTATGATCTTGTTTGCTTCTCCATGGCCTTCCAGTTGA		ATGGCCAAACCCAAACCCAAACCCCCAATCCGAGCCTCCATAAACTCCCCTCATGTAATCACTACTGATCAGATTATGATCTTGTTTGCTTCTCCATGGCCTTCCAGTTGA		MAKPKPKPPIRASINSPHVITTDQIMILFASPWPSS*		MAKPKPKPPIRASINSPHVITTDQIMILFASPWPSS*		ACCCCCGTTT	TCAACCTTCA	0		0	0	0	0	0
6332	3083	af	AN0633.1	70.m15649	AO070318000123	1			-123	-88			ATGATCTTGTTTGCTTCTCCATGGCCTTCCAGTTGA		ATGATCTTGTTTGCTTCTCCATGGCCTTCCAGTTGA		MILFASPWPSS*		MILFASPWPSS*		TGATCAGATT	TCAACCTTCA	0		0	0	0	0	0
6333	3083	af	AN0633.1	70.m15649	AO070318000123	1			-103	-47			ATGGCCTTCCAGTTGATCAACCTTCATGTGAAGGTAGTAAACAGGTTCGCCGGTTGA		ATGGCCTTCCAGTTGATCAACCTTCATGTGAAGGTAGTAAACAGGTTCGCCGGTTGA		MAFQLINLHVKVVNRFAG*		MAFQLINLHVKVVNRFAG*		TTGCTTCTCC	TCGGGGCCAC	0		0	0	0	0	0
6334	3083	ao	AN0633.1	70.m15649	AO070318000123	1					-171	-118	ATGTGCGCCTCTCACGCCATCTTCCTGCAGCAATTTCTGCCATCTCAGATGTAA			ATGTGCGCCTCTCACGCCATCTTCCTGCAGCAATTTCTGCCATCTCAGATGTAA	MCASHAIFLQQFLPSQM*			MCASHAIFLQQFLPSQM*	GATCCGCTCA	CCTCTTTCGA	0		0	0	0	0	0
6335	3083	ao	AN0633.1	70.m15649	AO070318000123	1					-92	-72	ATGTCCTTCACAGGAAGGTAG			ATGTCCTTCACAGGAAGGTAG	MSFTGR*			MSFTGR*	TAACGGCTTC	TGGTGCCGTG	0		0	0	0	0	0
6359	3088	af	AN0873.1	70.m15476	AO070320000032	0			-60	-7			ATGGAGACGCTCAATTCCTTCATTCTCATAGAAATATCTCTTTTTGTATACTAA		ATGGAGACGCTCAATTCCTTCATTCTCATAGAAATATCTCTTTTTGTATACTAA		METLNSFILIEISLFVY*		METLNSFILIEISLFVY*		ATTTGAGAGC	GTCAACATGT	1	R	0	0	0	0	0
6402	3102	an	AN0189.1	71.m15459	AO070321000054	0	-60	-22					ATGCATTTTCTCGAACCGAACTCAGGGAATCAAATTTAA	ATGCATTTTCTCGAACCGAACTCAGGGAATCAAATTTAA			MHFLEPNSGNQI*	MHFLEPNSGNQI*			ATAAATCTGA	CTACGATAAT	1	A	0	MG01893.1	0	0	0
6407	3103	an	AN0182.1	71.m16065	AO070321000058	1	-342	-283					ATGCTAAGTCGAGGCAGCCAAGCGAATCGCGTCCCGGCTCACACTCAATTCCGCCTGTGA	ATGCTAAGTCGAGGCAGCCAAGCGAATCGCGTCCCGGCTCACACTCAATTCCGCCTGTGA			MLSRGSQANRVPAHTQFRL*	MLSRGSQANRVPAHTQFRL*			AAAACCTTGC	CAGAGTTCCA	0	R	0	0	0	0	0
6413	3109	af	AN4539.1	57.m05582	AO070321000157	1			-380	-291			ATGATCCCTTTCACCCGGTGCTACAGCCGCTGTTTCCGAATTCCCCCATATATACTTTCCTACTTCCAAAGTTGTACAGTCAGTCCATAA		ATGATCCCTTTCACCCGGTGCTACAGCCGCTGTTTCCGAATTCCCCCATATATACTTTCCTACTTCCAAAGTTGTACAGTCAGTCCATAA		MIPFTRCYSRCFRIPPYILSYFQSCTVSP*		MIPFTRCYSRCFRIPPYILSYFQSCTVSP*		GTCAACATAC	AGCGGGGAGC	0	R	0	0	0	0	0
6416	3115	conserved	AN8009.1	53.m03858	AO070322000058	1	-191	-126	-317	-141	-325	-125	ATGACAGGTGTTCGdyykGGryywvhsyykGwhGhyykGhsmTyhyhsTdybdyAwsyTsdhCydsysTGTskkTmTyyyTTTrrsskkkrkrsmCsyCkmrsrrrmsGwkrGACrmwsssmrwmGkCwGwswGrArssskryCGkkykkAsrwkryAswGTCmkrwCkTkmTswrrTTATACTGTCATAACTTGATCTAG	ATGACAGGTGTTCGGCCGGGGTCAAACCCGGTCGTTCTGAGATTATACTGTCATAACTTGATCTAG	ATGACAGGTGTTCGATCTGGGTTTCTGTCTGAAGACTGGTGCTTTTTGTTCGGTATGCTCGACTGCTCTGTGGTTATTTTTTTGACCTGGAGAGACGCCTCGCAGACGGATGGACGCTCCCAGTCGTCAGTCAGAAACCCGGTCGTTCTGAGATTATACTGTCATAACTTGATCTAG	ATGACAGGTGTTCGTCTTGGACCTGCCCTGGTTGCCTGGCCATCCCCCTACTTCATGCTGTCCCTGCGTGTCTGTCTCCCTTTAGGGGTTGTGCCCCTCGAAGGAGACGTGAGACAAAGGGCAAAGGCTGAGTGGAGGGGTACCGGGTGTACGAGGCAGAGTCCGGTCGTTCTGAGATTATACTGTCATAACTTGATCTAG	MTGVRpGsnpvvlrlychnLi*	MTGVRPGSNPVVLRLYCHNLI*	MTGVRSGFLSEDWCFLFGMLDCSVVIFLTWRDASQTDGRSQSSVRNPVVLRLYCHNLI*	MTGVRLGPALVAWPSPYFMLSLRVCLPLGVVPLEGDVRQRAKAEWRGTGCTRQSPVVLRLYCHNLI*	ywGCwysCGC	ATAATACTAG	0	P	FG01672.1	0	0	0	0
6417	3115	an	AN8009.1	53.m03858	AO070322000058	1	-248	-126					ATGGGTTCAGACGGGTCAAGGTATCGTACAGATTATCCAAACAGTCACTGCATCCGCATGACAGGTGTTCGGCCGGGGTCAAACCCGGTCGTTCTGAGATTATACTGTCATAACTTGATCTAG	ATGGGTTCAGACGGGTCAAGGTATCGTACAGATTATCCAAACAGTCACTGCATCCGCATGACAGGTGTTCGGCCGGGGTCAAACCCGGTCGTTCTGAGATTATACTGTCATAACTTGATCTAG			MGSDGSRYRTDYPNSHCIRMTGVRPGSNPVVLRLYCHNLI*	MGSDGSRYRTDYPNSHCIRMTGVRPGSNPVVLRLYCHNLI*			GACTTTCGCT	ATAATACTAG	0	P	FG01672.1	0	0	0	0
6418	3115	an	AN8009.1	53.m03858	AO070322000058	1	-106	-62					ATGCGTTGCATTGATTGCCCCCTTTTTGAAAGGAAGAGAGCATAG	ATGCGTTGCATTGATTGCCCCCTTTTTGAAAGGAAGAGAGCATAG			MRCIDCPLFERKRA*	MRCIDCPLFERKRA*			GCGAAAGGAC	TCTCTCATGC	0	P	FG01672.1	0	0	0	0
6419	3115	an	AN8009.1	53.m03858	AO070322000058	1	-55	-26					ATGCTGACAACTTCTAGTCACCCGATCTGA	ATGCTGACAACTTCTAGTCACCCGATCTGA			MLTTSSHPI*	MLTTSSHPI*			ATAGTCTCTC	TCCTATCTGA	1	P	FG01672.1	0	0	0	0
6420	3115	af	AN8009.1	53.m03858	AO070322000058	1			-417	-373			ATGGGGCCGCGCAGTCAAGATGACCCTCGGGGTCATTTTCGCTAG		ATGGGGCCGCGCAGTCAAGATGACCCTCGGGGTCATTTTCGCTAG		MGPRSQDDPRGHFR*		MGPRSQDDPRGHFR*		AGGACTCACC	GGGTTGAGAT	0	P	FG01672.1	0	0	0	0
6421	3115	af	AN8009.1	53.m03858	AO070322000058	1			-398	-366			ATGACCCTCGGGGTCATTTTCGCTAGGGGTTGA		ATGACCCTCGGGGTCATTTTCGCTAGGGGTTGA		MTLGVIFARG*		MTLGVIFARG*		CGCAGTCAAG	GATGGGTCAA	0	P	FG01672.1	0	0	0	0
6422	3115	af	AN8009.1	53.m03858	AO070322000058	1			-364	-314			ATGGGTCAAGGTATCGTACATTGTATAATAACAGTCACTGCTCGCGCATGA		ATGGGTCAAGGTATCGTACATTGTATAATAACAGTCACTGCTCGCGCATGA		MGQGIVHCIITVTARA*		MGQGIVHCIITVTARA*		AGGGGTTGAG	CAGGTGTTCG	0	P	FG01672.1	0	0	0	0
6423	3115	af	AN8009.1	53.m03858	AO070322000058	1			-263	-141			ATGCTCGACTGCTCTGTGGTTATTTTTTTGACCTGGAGAGACGCCTCGCAGACGGATGGACGCTCCCAGTCGTCAGTCAGAAACCCGGTCGTTCTGAGATTATACTGTCATAACTTGATCTAG		ATGCTCGACTGCTCTGTGGTTATTTTTTTGACCTGGAGAGACGCCTCGCAGACGGATGGACGCTCCCAGTCGTCAGTCAGAAACCCGGTCGTTCTGAGATTATACTGTCATAACTTGATCTAG		MLDCSVVIFLTWRDASQTDGRSQSSVRNPVVLRLYCHNLI*		MLDCSVVIFLTWRDASQTDGRSQSSVRNPVVLRLYCHNLI*		TTTGTTCGGT	ATAATACTAG	0	P	FG01672.1	0	0	0	0
6424	3115	af	AN8009.1	53.m03858	AO070322000058	1			-208	-167			ATGGACGCTCCCAGTCGTCAGTCAGAAACCCGGTCGTTCTGA		ATGGACGCTCCCAGTCGTCAGTCAGAAACCCGGTCGTTCTGA		MDAPSRQSETRSF*		MDAPSRQSETRSF*		TCGCAGACGG	GATTATACTG	0	P	FG01672.1	0	0	0	0
6425	3115	af	AN8009.1	53.m03858	AO070322000058	1			-121	-83			ATGCGTGGCACTGATTGTCCCCCTTACCCCCTTCTGTGA		ATGCGTGGCACTGATTGTCCCCCTTACCCCCTTCTGTGA		MRGTDCPPYPLL*		MRGTDCPPYPLL*		GCGAAAGGAC	AAGATGAGGG	0	P	FG01672.1	0	0	0	0
6426	3115	af	AN8009.1	53.m03858	AO070322000058	1			-79	-47			ATGAGGGGCTTTGCCTCTCTGTTTGCTGACTGA		ATGAGGGGCTTTGCCTCTCTGTTTGCTGACTGA		MRGFASLFAD*		MRGFASLFAD*		TCTGTGAAAG	TTTTCAGAAC	0	P	FG01672.1	0	0	0	0
6427	3115	ao	AN8009.1	53.m03858	AO070322000058	1					-429	-379	ATGAGGCCGCGCAGCCAGAATGACCTTCTGGGTCGTTTCGCTATGGGTTAA			ATGAGGCCGCGCAGCCAGAATGACCTTCTGGGTCGTTTCGCTATGGGTTAA	MRPRSQNDLLGRFAMG*			MRPRSQNDLLGRFAMG*	ACGGCTCACT	TTTAACCACA	0	P	FG01672.1	0	0	0	0
6428	3115	ao	AN8009.1	53.m03858	AO070322000058	1					-410	-342	ATGACCTTCTGGGTCGTTTCGCTATGGGTTAATTTAACCACACGGGTCAAGGTATCGTACATAGTATAA			ATGACCTTCTGGGTCGTTTCGCTATGGGTTAATTTAACCACACGGGTCAAGGTATCGTACATAGTATAA	MTFWVVSLWVNLTTRVKVSYIV*			MTFWVVSLWVNLTTRVKVSYIV*	CGCAGCCAGA	CAGTCATAGC	0	P	FG01672.1	0	0	0	0
6429	3115	ao	AN8009.1	53.m03858	AO070322000058	1					-271	-125	ATGCTGTCCCTGCGTGTCTGTCTCCCTTTAGGGGTTGTGCCCCTCGAAGGAGACGTGAGACAAAGGGCAAAGGCTGAGTGGAGGGGTACCGGGTGTACGAGGCAGAGTCCGGTCGTTCTGAGATTATACTGTCATAACTTGATCTAG			ATGCTGTCCCTGCGTGTCTGTCTCCCTTTAGGGGTTGTGCCCCTCGAAGGAGACGTGAGACAAAGGGCAAAGGCTGAGTGGAGGGGTACCGGGTGTACGAGGCAGAGTCCGGTCGTTCTGAGATTATACTGTCATAACTTGATCTAG	MLSLRVCLPLGVVPLEGDVRQRAKAEWRGTGCTRQSPVVLRLYCHNLI*			MLSLRVCLPLGVVPLEGDVRQRAKAEWRGTGCTRQSPVVLRLYCHNLI*	CCCCTACTTC	ATAATACTAG	0	P	FG01672.1	0	0	0	0
6430	3115	ao	AN8009.1	53.m03858	AO070322000058	1					-105	-37	ATGCGTGGCATTGATTGTTCCCCTTTATATCTCTTGTCACAGAAGAGGGACTTCGGTCCCCTTTACTAA			ATGCGTGGCATTGATTGTTCCCCTTTATATCTCTTGTCACAGAAGAGGGACTTCGGTCCCCTTTACTAA	MRGIDCSPLYLLSQKRDFGPLY*			MRGIDCSPLYLLSQKRDFGPLY*	GCGAAAGGAC	CAAGTTTCAG	0	P	FG01672.1	0	0	0	0
6457	3124	af	AN1782.1	69.m15081	AO070324000013	0			-38	-6			ATGAAACATAGCAGTTCGAGAGCAGTGACGTGA		ATGAAACATAGCAGTTCGAGAGCAGTGACGTGA		MKHSSSRAVT*		MKHSSSRAVT*		TTGCGTCTTC	ACATTATGGC	1	BK	0	0	0	0	0
6470	3136	an	AN6569.1	62.m03156	AO070326000012	0	-43	-26					ATGAGTTTTTCCCCCTAA	ATGAGTTTTTCCCCCTAA			MSFSP*	MSFSP*			TACTATCTTA	TTGTCAGCAG	1	O	0	0	0	0	0
6477	3137	ao	AN6589.1	62.m03178	AO070326000037	0					-41		ATGAATACGGCCTCGACAGACTCGGCGACCTCCTACCCGTGA			ATGAATACGGCCTCGACAGACTCGGCGACCTCCTACCCGTGA	MNTASTDSATSYP*			MNTASTDSATSYP*	GTCGCTTTAG	TGGCATCCGG	1	T	FG05591.1	0	0	0	0
6484	3140	an	AN6637.1	62.m03232	AO070326000089	1	-327	-313					ATGTCTTCGTCATAG	ATGTCTTCGTCATAG			MSSS*	MSSS*			ACATCCCTTG	CAGATCTCTC	0	F	0	0	0	0	0
6485	3140	an	AN6637.1	62.m03232	AO070326000089	1	-170	-42					ATGATGATCTTTCCGTTTTTTATAGATGTTAGACTTCCTAAGCATATTGCGGACACTTTCCGGCCTGACCTAAACTATAACATATCGCATATTCTTTTATCTCGCTTGAGCTGGGTGCGCGTTTGCTGA	ATGATGATCTTTCCGTTTTTTATAGATGTTAGACTTCCTAAGCATATTGCGGACACTTTCCGGCCTGACCTAAACTATAACATATCGCATATTCTTTTATCTCGCTTGAGCTGGGTGCGCGTTTGCTGA			MMIFPFFIDVRLPKHIADTFRPDLNYNISHILLSRLSWVRVC*	MMIFPFFIDVRLPKHIADTFRPDLNYNISHILLSRLSWVRVC*			CCTCCCTTTC	TAAATCACAC	0	F	0	0	0	0	0
6486	3140	an	AN6637.1	62.m03232	AO070326000089	1	-167	-42					ATGATCTTTCCGTTTTTTATAGATGTTAGACTTCCTAAGCATATTGCGGACACTTTCCGGCCTGACCTAAACTATAACATATCGCATATTCTTTTATCTCGCTTGAGCTGGGTGCGCGTTTGCTGA	ATGATCTTTCCGTTTTTTATAGATGTTAGACTTCCTAAGCATATTGCGGACACTTTCCGGCCTGACCTAAACTATAACATATCGCATATTCTTTTATCTCGCTTGAGCTGGGTGCGCGTTTGCTGA			MIFPFFIDVRLPKHIADTFRPDLNYNISHILLSRLSWVRVC*	MIFPFFIDVRLPKHIADTFRPDLNYNISHILLSRLSWVRVC*			CCCTTTCATG	TAAATCACAC	0	F	0	0	0	0	0
6487	3140	an	AN6637.1	62.m03232	AO070326000089	1	-145	-98					ATGTTAGACTTCCTAAGCATATTGCGGACACTTTCCGGCCTGACCTAA	ATGTTAGACTTCCTAAGCATATTGCGGACACTTTCCGGCCTGACCTAA			MLDFLSILRTLSGLT*	MLDFLSILRTLSGLT*			TTTTTTATAG	ACTATAACAT	0	F	0	0	0	0	0
6488	3140	af	AN6637.1	62.m03232	AO070326000089	1			-350	-339			ATGTCTCAATAA		ATGTCTCAATAA		MSQ*		MSQ*		GGCTATTGTT	GAGAGTCGTT	0	F	0	0	0	0	0
6489	3140	af	AN6637.1	62.m03232	AO070326000089	1			-167	-99			ATGAATTTCGGTTTTTTTTTTATAGATGTTAGACTTCCTAAGCATCCTTGCGGAGAAAATCCGATCTGA		ATGAATTTCGGTTTTTTTTTTATAGATGTTAGACTTCCTAAGCATCCTTGCGGAGAAAATCCGATCTGA		MNFGFFFIDVRLPKHPCGENPI*		MNFGFFFIDVRLPKHPCGENPI*		CTCTTTTGTG	CTTAAATGCT	0	F	0	0	0	0	0
6490	3140	af	AN6637.1	62.m03232	AO070326000089	1			-142	-80			ATGTTAGACTTCCTAAGCATCCTTGCGGAGAAAATCCGATCTGACTTAAATGCTTCACCTTGA		ATGTTAGACTTCCTAAGCATCCTTGCGGAGAAAATCCGATCTGACTTAAATGCTTCACCTTGA		MLDFLSILAEKIRSDLNASP*		MLDFLSILAEKIRSDLNASP*		TTTTTTATAG	TTTGTCTTAC	0	F	0	0	0	0	0
6491	3140	af	AN6637.1	62.m03232	AO070326000089	1			-93	-58			ATGCTTCACCTTGATTTGTCTTACCATTCAGTCTGA		ATGCTTCACCTTGATTTGTCTTACCATTCAGTCTGA		MLHLDLSYHSV*		MLHLDLSYHSV*		TCTGACTTAA	TTCCCAGGCC	0	F	0	0	0	0	0
6492	3140	af	AN6637.1	62.m03232	AO070326000089	1			-45	-31			ATGCTGATATCATGA		ATGCTGATATCATGA		MLIS*		MLIS*		CCCAGGCCCA	ATACTTCTAG	1	F	0	0	0	0	0
6493	3140	ao	AN6637.1	62.m03232	AO070326000089	1					-334	-311	ATGACTATTGTTATGTTTCGATAG			ATGACTATTGTTATGTTTCGATAG	MTIVMFR*			MTIVMFR*	CTTATCCTCT	AGTCAAAAAC	0	F	0	0	0	0	0
6494	3140	ao	AN6637.1	62.m03232	AO070326000089	1					-322	-311	ATGTTTCGATAG			ATGTTTCGATAG	MFR*			MFR*	GACTATTGTT	AGTCAAAAAC	0	F	0	0	0	0	0
6495	3140	ao	AN6637.1	62.m03232	AO070326000089	1					-185	-168	ATGCCCCTCCTTTCATGA			ATGCCCCTCCTTTCATGA	MPLLS*			MPLLS*	ATCAATCAAT	TGAATTTCGG	0	F	0	0	0	0	0
6496	3140	ao	AN6637.1	62.m03232	AO070326000089	1					-171	-100	ATGATGAATTTCGGTTTTTTTATTATAGATGTTAGACTTCCTAAGCATTTTTGCGGAGAAAATCCGACCTGA			ATGATGAATTTCGGTTTTTTTATTATAGATGTTAGACTTCCTAAGCATTTTTGCGGAGAAAATCCGACCTGA	MMNFGFFIIDVRLPKHFCGENPT*			MMNFGFFIIDVRLPKHFCGENPT*	CCCTCCTTTC	TCTCATATTC	0	F	0	0	0	0	0
6497	3140	ao	AN6637.1	62.m03232	AO070326000089	1					-168	-100	ATGAATTTCGGTTTTTTTATTATAGATGTTAGACTTCCTAAGCATTTTTGCGGAGAAAATCCGACCTGA			ATGAATTTCGGTTTTTTTATTATAGATGTTAGACTTCCTAAGCATTTTTGCGGAGAAAATCCGACCTGA	MNFGFFIIDVRLPKHFCGENPT*			MNFGFFIIDVRLPKHFCGENPT*	TCCTTTCATG	TCTCATATTC	0	F	0	0	0	0	0
6498	3140	ao	AN6637.1	62.m03232	AO070326000089	1					-143	-51	ATGTTAGACTTCCTAAGCATTTTTGCGGAGAAAATCCGACCTGATCTCATATTCGATGCTGTTTATATTGTCTCACAGCTCATCCATTTGTGA			ATGTTAGACTTCCTAAGCATTTTTGCGGAGAAAATCCGACCTGATCTCATATTCGATGCTGTTTATATTGTCTCACAGCTCATCCATTTGTGA	MLDFLSIFAEKIRPDLIFDAVYIVSQLIHL*			MLDFLSIFAEKIRPDLIFDAVYIVSQLIHL*	TTTATTATAG	GAGCCTTGGT	0	F	0	0	0	0	0
6499	3140	ao	AN6637.1	62.m03232	AO070326000089	1					-88	-38	ATGCTGTTTATATTGTCTCACAGCTCATCCATTTGTGAGAGCCTTGGTTAA			ATGCTGTTTATATTGTCTCACAGCTCATCCATTTGTGAGAGCCTTGGTTAA	MLFILSHSSSICESLG*			MLFILSHSSSICESLG*	CTCATATTCG	TCATAAGCAT	0	F	0	0	0	0	0
6500	3141	ao	AN2244.1	71.m15878	AO070326000129	1					-321	-310	ATGATGGAATAG			ATGATGGAATAG	MME*			MME*	TTTCCAATAC	ATACTATCAT	0	T	0	MG08640.1	NCU01183.1	0	0
6521	3153	ao	AN5563.1	58.m07489	AO070328000044	1					-212	-198	ATGGAACTTAACTAA			ATGGAACTTAACTAA	MELN*			MELN*	AGATTAATTA	ACCCCTCCCT	0	R	FG07908.1	MG00097.1	NCU04923.1	0	0
6564	3170	af	AN4709.1	71.m15697	AO070329000166	0			-27	-13			ATGAGGGACTTATAG		ATGAGGGACTTATAG		MRDL*		MRDL*		AATTCTGGTG	GTCTCTGGAC	1	TU	FG08522.1	MG03069.1	NCU00656.1	0	0
6565	3170	ao	AN4709.1	71.m15697	AO070329000166	0					-51	-28	ATGAAGGACTCCAAGAGTCAATGA			ATGAAGGACTCCAAGAGTCAATGA	MKDSKSQ*			MKDSKSQ*	GATATATGTA	GGGCTAATTC	1	TU	FG08522.1	MG03069.1	NCU00656.1	0	0
6568	3175	af	AN1117.1	70.m15118	AO070331000109	1			-127	-101			ATGAATTCTGCTCCGGAGTTTCGTTGA		ATGAATTCTGCTCCGGAGTTTCGTTGA		MNSAPEFR*		MNSAPEFR*		TCGGATCCTT	ATTTACCCTC	0	U	0	0	0	0	0
6578	3178	conserved	AN1179.1	70.m15038	AO070331000175	1	-27	-10	-27	-10	-27	-10	ATGTCATyCCbTybyTrA	ATGTCATCCCCTCGTTAA	ATGTCATCCCGTCCTTGA	ATGTCATTCCTTTTCTGA	MSspr*	MSSPR*	MSSRP*	MSFLF*	dyhvGATCCG	yTmGyCTCAA	0	U	0	0	0	0	0
6579	3178	an	AN1179.1	70.m15038	AO070331000176	1	-93	-10					ATGCATTGTCTGGCTGTTCACTCGCCTTCTTTCGTTCGCCACCCATCCAACAGTCAGTTCGATCCGATGTCATCCCCTCGTTAA	ATGCATTGTCTGGCTGTTCACTCGCCTTCTTTCGTTCGCCACCCATCCAACAGTCAGTTCGATCCGATGTCATCCCCTCGTTAA			MHCLAVHSPSFVRHPSNSQFDPMSSPR*	MHCLAVHSPSFVRHPSNSQFDPMSSPR*			TGCTCCTTGT	CTCGTCTCAA	0	U	0	0	0	0	0
6585	3181	af	AN1222.1	70.m15003	AO070331000222	1			-219	-196			ATGGCGCAATCGGGGCCTCATTAA		ATGGCGCAATCGGGGCCTCATTAA		MAQSGPH*		MAQSGPH*		CCGGAGCAAG	TACGGCCAAA	0	H	0	MG00383.1	0	0	0
6587	3181	ao	AN1222.1	70.m15003	AO070331000222	1					-247	-185	ATGCGCACTTTTTCTGCCGAGGGTGACCGCCGGAGGAAGATGGCGCCATCGGCGGCACATTAA			ATGCGCACTTTTTCTGCCGAGGGTGACCGCCGGAGGAAGATGGCGCCATCGGCGGCACATTAA	MRTFSAEGDRRRKMAPSAAH*			MRTFSAEGDRRRKMAPSAAH*	AGATGTCAGA	TACGGCCAGA	0	H	0	MG00383.1	0	0	0
6588	3181	ao	AN1222.1	70.m15003	AO070331000222	1					-208	-185	ATGGCGCCATCGGCGGCACATTAA			ATGGCGCCATCGGCGGCACATTAA	MAPSAAH*			MAPSAAH*	CCGGAGGAAG	TACGGCCAGA	0	H	0	MG00383.1	0	0	0
6597	3186	conserved	AN9125.1	66.m04585	AO070332000149	1	-52	-26	-62	-36	-65	-39	ATGChmdyTywymAdsvybTbCGGTGA	ATGCAATTTTACCAACGCCTGCGGTGA	ATGCTCACTTTCAATGCCGTCCGGTGA	ATGCCAGTTCATAAGCATTTTCGGTGA	MqfyqrlR*	MQFYQRLR*	MLTFNAVR*	MPVHKHFR*	mkmwyykAmh	ywbbwCkCyy	0	K	FG00778.1	0	NCU00727.1	YNR003C	0
6599	3186	af	AN9125.1	66.m04585	AO070332000149	1			-49	-11			ATGCCGTCCGGTGATATTTCTCTCTCTCTCTGTGACTGA		ATGCCGTCCGGTGATATTTCTCTCTCTCTCTGTGACTGA		MPSGDISLSLCD*		MPSGDISLSLCD*		CTCACTTTCA	CGGCTCAAAA	1	K	FG00778.1	0	NCU00727.1	YNR003C	0
6601	3186	ao	AN9125.1	66.m04585	AO070332000149	1					-92	-81	ATGCTGGTCTAA			ATGCTGGTCTAA	MLV*			MLV*	GTATAGATAG	TATGCATCTC	0	K	FG00778.1	0	NCU00727.1	YNR003C	0
6602	3186	ao	AN9125.1	66.m04585	AO070332000149	1					-79	-68	ATGCATCTCTGA			ATGCATCTCTGA	MHL*			MHL*	CTGGTCTAAT	ATATGCCAGT	0	K	FG00778.1	0	NCU00727.1	YNR003C	0
6620	3189	ao	AN9085.1	66.m04772	AO070332000192	1					-93	-43	ATGCCATTTTTTCTGTACAATCCAGAGCCTTTTCTCATTACAAGTTTCTAA			ATGCCATTTTTTCTGTACAATCCAGAGCCTTTTCTCATTACAAGTTTCTAA	MPFFLYNPEPFLITSF*			MPFFLYNPEPFLITSF*	TGCTATCTTC	AAATTGTCAT	0	A	0	0	0	0	0
6622	3190	af	AN9078.1	66.m04536	AO070332000201	0			-47	-24			ATGTCGAATTCTATGACCCCTTAA		ATGTCGAATTCTATGACCCCTTAA		MSNSMTP*		MSNSMTP*		GCCTACTTCA	CTGTCGCTAA	1		0	0	0	0	0
6623	3190	af	AN9078.1	66.m04536	AO070332000201	0			-35	-24			ATGACCCCTTAA		ATGACCCCTTAA		MTP*		MTP*		GTCGAATTCT	CTGTCGCTAA	1		0	0	0	0	0
6681	3220	ao	AN3013.1	59.m09003	AO070337000103	0					-57	-25	ATGCTATTTAAATCAGGACAAATTGATTCATAG			ATGCTATTTAAATCAGGACAAATTGATTCATAG	MLFKSGQIDS*			MLFKSGQIDS*	CTTCTATTCT	TTCTACTCGC	1		FG06325.1	MG00882.1	0	0	0
6714	3237	an	AN2886.1	59.m08733	AO070338000128	0	-42	-22					ATGCTTCCTTTGAGTCTCTGA	ATGCTTCCTTTGAGTCTCTGA			MLPLSL*	MLPLSL*			AGATCACGAG	CCTGCCACGA	1		0	0	0	0	0
6716	3239	ao	AN2859.1	59.m08702	AO070338000163	0					-54	-16	ATGTATACTATCACACCATTCAGTACTAATATCTGGTAG			ATGTATACTATCACACCATTCAGTACTAATATCTGGTAG	MYTITPFSTNIW*			MYTITPFSTNIW*	CGACGGCACT	AAAAGAAGCA	1	EM	0	MG07462.1	NCU09532.1	0	0
6730	3246	af	AN0411.1	54.m06663	AO070338000254	1			-58	-38			ATGATCGTCAGCTATATTTAA		ATGATCGTCAGCTATATTTAA		MIVSYI*		MIVSYI*		TCTTTTCCTT	ATTTCTTTCA	1	U	0	0	0	0	0
6737	3249	an	AN0443.1	54.m06633	AO070338000300	1	-243	-223					ATGCAGAATACTCCGGGCTGA	ATGCAGAATACTCCGGGCTGA			MQNTPG*	MQNTPG*			CAGAAGAAGG	TTCGCAGAAG	0	ER	FG04922.1	0	0	0	0
6738	3249	an	AN0443.1	54.m06633	AO070338000300	1	-177	-127					ATGTCTGGTGTAGAAGCTGGACTGCCCTCAGCTCACCCGCACTCTATTTAG	ATGTCTGGTGTAGAAGCTGGACTGCCCTCAGCTCACCCGCACTCTATTTAG			MSGVEAGLPSAHPHSI*	MSGVEAGLPSAHPHSI*			CCCAGTTGGC	ACCGGCCCAG	0	ER	FG04922.1	0	0	0	0
6762	3256	an	AN6176.1	72.m18993	AO070340000023	0	-50	-12					ATGATATACTTATACATAATCAGGCATAAAACATCATAA	ATGATATACTTATACATAATCAGGCATAAAACATCATAA			MIYLYIIRHKTS*	MIYLYIIRHKTS*			TTACAAGACG	TCGTTATCAT	1		0	0	0	0	0
6769	3256	af	AN6176.1	72.m18993	AO070340000023	0			-48	-34			ATGGTTAGTTGCTAG		ATGGTTAGTTGCTAG		MVSC*		MVSC*		AGTGAACGCT	ATTACTGACA	1		0	0	0	0	0
6773	3256	ao	AN6176.1	72.m18993	AO070340000023	0					-32	-21	ATGGCTAACTAA			ATGGCTAACTAA	MAN*			MAN*	CCGTGAGTTA	GTCTTTAGAC	1		0	0	0	0	0
6780	3259	an	AN6126.1	72.m19031	AO070340000068	0	-44	-30					ATGGGAAGCGTTTAA	ATGGGAAGCGTTTAA			MGSV*	MGSV*			TATATATCGC	TACATAATAC	1	I	0	0	0	0	0
6781	3259	ao	AN6126.1	72.m19031	AO070340000068	0					-37	-23	ATGGGAATTGTATAA			ATGGGAATTGTATAA	MGIV*			MGIV*	GATATTTCGC	TCTATAATTC	1	I	0	0	0	0	0
6813	3269	af	AN6034.1	72.m19950	AO070340000254	1			-194	-108			ATGTTGGAACAAGGCTTCCCACGTGACCCACTGTATCCAGGGCCGTCCCCACATGGCCGAGTTTCGATATCGCATGCAATGCTTTGA		ATGTTGGAACAAGGCTTCCCACGTGACCCACTGTATCCAGGGCCGTCCCCACATGGCCGAGTTTCGATATCGCATGCAATGCTTTGA		MLEQGFPRDPLYPGPSPHGRVSISHAML*		MLEQGFPRDPLYPGPSPHGRVSISHAML*		TTTCGAACCG	TGGATTATTT	0		0	0	0	0	0
6814	3269	af	AN6034.1	72.m19950	AO070340000254	1			-142	-59			ATGGCCGAGTTTCGATATCGCATGCAATGCTTTGATGGATTATTTGCCGGATTTGAAACGAATGGTAATACAATTCAGGCTTGA		ATGGCCGAGTTTCGATATCGCATGCAATGCTTTGATGGATTATTTGCCGGATTTGAAACGAATGGTAATACAATTCAGGCTTGA		MAEFRYRMQCFDGLFAGFETNGNTIQA*		MAEFRYRMQCFDGLFAGFETNGNTIQA*		CCGTCCCCAC	CGTTGGACTT	0		0	0	0	0	0
6815	3269	af	AN6034.1	72.m19950	AO070340000254	1			-121	-59			ATGCAATGCTTTGATGGATTATTTGCCGGATTTGAAACGAATGGTAATACAATTCAGGCTTGA		ATGCAATGCTTTGATGGATTATTTGCCGGATTTGAAACGAATGGTAATACAATTCAGGCTTGA		MQCFDGLFAGFETNGNTIQA*		MQCFDGLFAGFETNGNTIQA*		TCGATATCGC	CGTTGGACTT	0		0	0	0	0	0
6816	3269	af	AN6034.1	72.m19950	AO070340000254	1			-108	-25			ATGGATTATTTGCCGGATTTGAAACGAATGGTAATACAATTCAGGCTTGACGTTGGACTTGGGACTTTGTTTTCTGATGAATAG		ATGGATTATTTGCCGGATTTGAAACGAATGGTAATACAATTCAGGCTTGACGTTGGACTTGGGACTTTGTTTTCTGATGAATAG		MDYLPDLKRMVIQFRLDVGLGTLFSDE*		MDYLPDLKRMVIQFRLDVGLGTLFSDE*		CAATGCTTTG	TCGCCTGCTC	0		0	0	0	0	0
6817	3269	af	AN6034.1	72.m19950	AO070340000254	1			-81	-25			ATGGTAATACAATTCAGGCTTGACGTTGGACTTGGGACTTTGTTTTCTGATGAATAG		ATGGTAATACAATTCAGGCTTGACGTTGGACTTGGGACTTTGTTTTCTGATGAATAG		MVIQFRLDVGLGTLFSDE*		MVIQFRLDVGLGTLFSDE*		TTTGAAACGA	TCGCCTGCTC	0		0	0	0	0	0
6818	3269	ao	AN6034.1	72.m19950	AO070340000254	1					-153	-37	ATGGACCGAGTCTCAATTGAATGCCGACCACGGCTCAGCGCATGGAATTTTATGAGATCATTCAGCAGTTCTTGCTCGAATCTCCCATGCTCACGACCGCCGTGCGATACAGTTTGA			ATGGACCGAGTCTCAATTGAATGCCGACCACGGCTCAGCGCATGGAATTTTATGAGATCATTCAGCAGTTCTTGCTCGAATCTCCCATGCTCACGACCGCCGTGCGATACAGTTTGA	MDRVSIECRPRLSAWNFMRSFSSSCSNLPCSRPPCDTV*			MDRVSIECRPRLSAWNFMRSFSSSCSNLPCSRPPCDTV*	GTCTCCCCAC	TCCGACTGGA	0		0	0	0	0	0
6819	3269	ao	AN6034.1	72.m19950	AO070340000254	1					-133	-17	ATGCCGACCACGGCTCAGCGCATGGAATTTTATGAGATCATTCAGCAGTTCTTGCTCGAATCTCCCATGCTCACGACCGCCGTGCGATACAGTTTGATCCGACTGGAACCCGGGTGA			ATGCCGACCACGGCTCAGCGCATGGAATTTTATGAGATCATTCAGCAGTTCTTGCTCGAATCTCCCATGCTCACGACCGCCGTGCGATACAGTTTGATCCGACTGGAACCCGGGTGA	MPTTAQRMEFYEIIQQFLLESPMLTTAVRYSLIRLEPG*			MPTTAQRMEFYEIIQQFLLESPMLTTAVRYSLIRLEPG*	TCTCAATTGA	TGTTCGATAT	0		0	0	0	0	0
6820	3269	ao	AN6034.1	72.m19950	AO070340000254	1					-112	-17	ATGGAATTTTATGAGATCATTCAGCAGTTCTTGCTCGAATCTCCCATGCTCACGACCGCCGTGCGATACAGTTTGATCCGACTGGAACCCGGGTGA			ATGGAATTTTATGAGATCATTCAGCAGTTCTTGCTCGAATCTCCCATGCTCACGACCGCCGTGCGATACAGTTTGATCCGACTGGAACCCGGGTGA	MEFYEIIQQFLLESPMLTTAVRYSLIRLEPG*			MEFYEIIQQFLLESPMLTTAVRYSLIRLEPG*	GGCTCAGCGC	TGTTCGATAT	0		0	0	0	0	0
6821	3269	ao	AN6034.1	72.m19950	AO070340000254	1					-102	-37	ATGAGATCATTCAGCAGTTCTTGCTCGAATCTCCCATGCTCACGACCGCCGTGCGATACAGTTTGA			ATGAGATCATTCAGCAGTTCTTGCTCGAATCTCCCATGCTCACGACCGCCGTGCGATACAGTTTGA	MRSFSSSCSNLPCSRPPCDTV*			MRSFSSSCSNLPCSRPPCDTV*	ATGGAATTTT	TCCGACTGGA	0		0	0	0	0	0
6822	3269	ao	AN6034.1	72.m19950	AO070340000254	1					-67	-17	ATGCTCACGACCGCCGTGCGATACAGTTTGATCCGACTGGAACCCGGGTGA			ATGCTCACGACCGCCGTGCGATACAGTTTGATCCGACTGGAACCCGGGTGA	MLTTAVRYSLIRLEPG*			MLTTAVRYSLIRLEPG*	CGAATCTCCC	TGTTCGATAT	0		0	0	0	0	0
6845	3279	an	AN5915.1	72.m19953	AO070340000372	1	-89	-69					ATGCCGTATAGCTGGTGCTGA	ATGCCGTATAGCTGGTGCTGA			MPYSWC*	MPYSWC*			GACCTCTTGG	GAGTGCGCCC	0	U	0	MG06273.1	0	0	0
6846	3279	ao	AN5915.1	72.m19953	AO070340000372	1					-91	-62	ATGAGAAGTACGAATATCAGGGGCTTCTGA			ATGAGAAGTACGAATATCAGGGGCTTCTGA	MRSTNIRGF*			MRSTNIRGF*	CATATCGTGC	GATATTTTAC	0	U	0	MG06273.1	0	0	0
6883	3289	af	AN4174.1	69.m14956	AO070341000088	0			-40	-14			ATGAGCCGTTGCAGGAACCTCTACTAG		ATGAGCCGTTGCAGGAACCTCTACTAG		MSRCRNLY*		MSRCRNLY*		TCATTTGCTA	ATTGTTGGCA	1	G	0	0	0	YML004C	0
6910	3297	ao	AN7967.1	57.m05767	AO070341000216	0					-29	-12	ATGCTTGTTAGTACATGA			ATGCTTGTTAGTACATGA	MLVST*			MLVST*	TTTACACATT	CCATTCGCAA	1	F	0	0	0	0	0
7071	3345	ao	AN6551.1	62.m03122	AO070270000034	0					-52	-35	ATGCAGTGGCACCCATGA			ATGCAGTGGCACCCATGA	MQWHP*			MQWHP*	TCTCAACCAT	GAGGTTTCTA	1		0	0	0	0	0
7072	3345	ao	AN6551.1	62.m03122	AO070270000034	0					-38	-24	ATGAGAGGTTTCTAG			ATGAGAGGTTTCTAG	MRGF*			MRGF*	AGTGGCACCC	CATGGTATGA	1		0	0	0	0	0
7073	3345	ao	AN6551.1	62.m03122	AO070270000034	0					-17		ATGACTTTGATGGCATAA			ATGACTTTGATGGCATAA	MTLMA*			MTLMA*	CTAGCATGGT	TGACGCAGAA	1		0	0	0	0	0
7081	3348	af	AN6359.1	72.m19499	AO070279000047	1			-20	-9			ATGAGTGGTTGA		ATGAGTGGTTGA		MSG*		MSG*		AATATACCAG	GTGCCGCTAT	1	R	0	0	0	0	0
7085	3350	an	AN1075.1	70.m15149	AO070285000075	1	-71	-48					ATGAAATCCAGTTTCGCGACGTAA	ATGAAATCCAGTTTCGCGACGTAA			MKSSFAT*	MKSSFAT*			AACTTTAGCA	GGTGGCTTGA	0	O	0	0	0	0	0
7086	3350	af	AN1075.1	70.m15149	AO070285000075	1			-100	-83			ATGGAAACTCCGTCATAA		ATGGAAACTCCGTCATAA		METPS*		METPS*		TCCTGTCTAA	ACTGGAGATG	0	O	0	0	0	0	0
7087	3350	af	AN1075.1	70.m15149	AO070285000075	1			-75	-61			ATGCGATCAACATAG		ATGCGATCAACATAG		MRST*		MRST*		TAAACTGGAG	GTCGTTTTCA	0	O	0	0	0	0	0
7088	3350	ao	AN1075.1	70.m15149	AO070285000075	1					-69	-40	ATGCAGCACAACGTACGCCGTTCCATTTGA			ATGCAGCACAACGTACGCCGTTCCATTTGA	MQHNVRRSI*			MQHNVRRSI*	TGGACTGGCA	GGAGACTCCA	0	O	0	0	0	0	0
7093	3355	an	AN7325.1	72.m19745	AO070297000077	0	-21	-10					ATGCGTCTATGA	ATGCGTCTATGA			MRL*	MRL*			TGTATTATAT	GTGTTCATCA	1	L	0	MG08071.1	0	0	0
7117	3371	af	AN0314.1	54.m06444	AO070334000018	1			-71	-21			ATGATGAAAACTGGCCACCTGCCTAACTGTACACGTCCAGTGACAATCTAG		ATGATGAAAACTGGCCACCTGCCTAACTGTACACGTCCAGTGACAATCTAG		MMKTGHLPNCTRPVTI*		MMKTGHLPNCTRPVTI*		CCGGTCTCGG	GTGGTCTCTC	0	J	0	MG04681.1	0	0	0
7118	3371	af	AN0314.1	54.m06444	AO070334000018	1			-68	-21			ATGAAAACTGGCCACCTGCCTAACTGTACACGTCCAGTGACAATCTAG		ATGAAAACTGGCCACCTGCCTAACTGTACACGTCCAGTGACAATCTAG		MKTGHLPNCTRPVTI*		MKTGHLPNCTRPVTI*		GTCTCGGATG	GTGGTCTCTC	0	J	0	MG04681.1	0	0	0
7136	3377	an	AN3933.1	69.m14994	AO070341000044	0	-50	-30					ATGCAAACTTTATCTCAGTAA	ATGCAAACTTTATCTCAGTAA			MQTLSQ*	MQTLSQ*			TCACTATCGC	AAGCCGGGAA	1	K	0	MG01572.1	0	0	0
7158	3387	af	AN5774.1	69.m14823	AO070249000018	0			-43	-8			ATGCGCCAGGTTAAGCATATTTTTTTCTCTATCTGA		ATGCGCCAGGTTAAGCATATTTTTTTCTCTATCTGA		MRQVKHIFFSI*		MRQVKHIFFSI*		CACATTATCC	ATTCGTTATG	1	S	FG05736.1	0	NCU00770.1	0	0
7170	3395	ao	AN6541.1	62.m03133	AO070270000044	0					-44	-27	ATGTTCCCCTTCAATTAG			ATGTTCCCCTTCAATTAG	MFPFN*			MFPFN*	TCAGTTCCTA	GTTTACTCGA	1	F	0	0	0	0	0
7186	3402	an	AN0239.1	71.m15643	AO070284000068	0	-54	-37					ATGTCTGATGGTCTCTAG	ATGTCTGATGGTCTCTAG			MSDGL*	MSDGL*			GTGATTGTTC	CCGTCAGGTA	1	TU	FG00191.1	0	NCU00671.1	0	0
7189	3402	af	AN0239.1	71.m15643	AO070284000068	0			-51	-22			ATGGTTGTTGGCCATCAGGTCGATAGTTGA		ATGGTTGTTGGCCATCAGGTCGATAGTTGA		MVVGHQVDS*		MVVGHQVDS*		ATGGTGTCTG	GGGTAAAGCT	1	TU	FG00191.1	0	NCU00671.1	0	0
7193	3402	ao	AN0239.1	71.m15643	AO070284000068	0					-60	-25	ATGGTGTCTGATGGTCTCTGGCCATCGAATAGGTAG			ATGGTGTCTGATGGTCTCTGGCCATCGAATAGGTAG	MVSDGLWPSNR*			MVSDGLWPSNR*	GTGCTGGCTC	TCGGGGATAA	1	TU	FG00191.1	0	NCU00671.1	0	0
7194	3402	ao	AN0239.1	71.m15643	AO070284000068	0					-50	-15	ATGGTCTCTGGCCATCGAATAGGTAGTCGGGGATAA			ATGGTCTCTGGCCATCGAATAGGTAGTCGGGGATAA	MVSGHRIGSRG*			MVSGHRIGSRG*	ATGGTGTCTG	GCTTCAGCGG	1	TU	FG00191.1	0	NCU00671.1	0	0
7195	3403	ao	AN2523.1	59.m08459	AO070286000091	1					-181	-155	ATGTTTGTTGTCACGTTGACCGAGTAG			ATGTTTGTTGTCACGTTGACCGAGTAG	MFVVTLTE*			MFVVTLTE*	GGTTCGGTTC	TATACAATTG	0	M	0	0	0	0	0
7200	3406	an	AN5139.1	54.m07054	AO070291000038	1	-62	-42					ATGCTGAAAAGAGTACGGTGA	ATGCTGAAAAGAGTACGGTGA			MLKRVR*	MLKRVR*			TAGTTACGAC	TTTACTCGGT	0	R	0	0	NCU08484.1	YPR135W	0
7201	3406	af	AN5139.1	54.m07054	AO070291000038	1			-71	-51			ATGTATAGCTCAGTGTTATGA		ATGTATAGCTCAGTGTTATGA		MYSSVL*		MYSSVL*		CTGGATTTAG	TTGTGCTTCC	0	R	0	0	NCU08484.1	YPR135W	0
7202	3406	af	AN5139.1	54.m07054	AO070291000038	1			-54	-13			ATGATTGTGCTTCCAGCGCTGACCCTTACCGGCATTTACTGA		ATGATTGTGCTTCCAGCGCTGACCCTTACCGGCATTTACTGA		MIVLPALTLTGIY*		MIVLPALTLTGIY*		GCTCAGTGTT	TCGGTATCTA	1	R	0	0	NCU08484.1	YPR135W	0
7203	3406	ao	AN5139.1	54.m07054	AO070291000038	1					-92	-45	ATGCGTCGGGTTGATCTCTCTGAGTGTTTCACGTTCAATTCCCGGTAA			ATGCGTCGGGTTGATCTCTCTGAGTGTTTCACGTTCAATTCCCGGTAA	MRRVDLSECFTFNSR*			MRRVDLSECFTFNSR*	ATTTTGATAG	CTCTATTTTC	0	R	0	0	NCU08484.1	YPR135W	0
7207	3407	af	AN8051.1	53.m03891	AO070292000094	0			-55	-20			ATGTCGTCTTTTTTCCACTGCGCAATCTCCCTCTAG		ATGTCGTCTTTTTTCCACTGCGCAATCTCCCTCTAG		MSSFFHCAISL*		MSSFFHCAISL*		TCCTTTACCA	CAATAATATC	1		0	0	0	0	0
7224	3416	af	AN6247.1	72.m19980	AO070304000102	1			-273	-142			ATGTCTTGCATCTTCCCGTTGCTGCTTCTTGCATTCGACTTACTAAACTCTTTACTTCTTATCCGAACTTCTGATTCTTTGCCTCGTCGTTCATTCCCGACAGCACATAGATCAGACCTCACTGGATCTTAG		ATGTCTTGCATCTTCCCGTTGCTGCTTCTTGCATTCGACTTACTAAACTCTTTACTTCTTATCCGAACTTCTGATTCTTTGCCTCGTCGTTCATTCCCGACAGCACATAGATCAGACCTCACTGGATCTTAG		MSCIFPLLLLAFDLLNSLLLIRTSDSLPRRSFPTAHRSDLTGS*		MSCIFPLLLLAFDLLNSLLLIRTSDSLPRRSFPTAHRSDLTGS*		ACGCATTCCC	CGCGCTTGCG	0		0	0	0	0	0
7225	3416	ao	AN6247.1	72.m19980	AO070304000102	1					-290	-147	ATGTCTTGCGTCTGCCCATTCCAGTACCTTCGTTCTGACCTGCAGACTACTCTTCGTTACTTGTCTTTCCCTACCTACCACTTATTTACTTTCTCCCCACCTCTTATCGCGACAGCGCATAAGGCCCATCCCACCTCGTCTTAG			ATGTCTTGCGTCTGCCCATTCCAGTACCTTCGTTCTGACCTGCAGACTACTCTTCGTTACTTGTCTTTCCCTACCTACCACTTATTTACTTTCTCCCCACCTCTTATCGCGACAGCGCATAAGGCCCATCCCACCTCGTCTTAG	MSCVCPFQYLRSDLQTTLRYLSFPTYHLFTFSPPLIATAHKAHPTSS*			MSCVCPFQYLRSDLQTTLRYLSFPTYHLFTFSPPLIATAHKAHPTSS*	TCGCATTCCC	TGCGCTTGCG	0		0	0	0	0	0
7227	3417	an	AN1715.1	58.m08959	AO070305000031	1	-151	-47					ATGACGAAAGATCTCTCGATTTGGGTGCTGAGTGTCCTGTCATGTCATGCATGCGGTTACAGGTACATAAAAGGCCTATCCAGGTCCACGTCGCAGTGGCATTAA	ATGACGAAAGATCTCTCGATTTGGGTGCTGAGTGTCCTGTCATGTCATGCATGCGGTTACAGGTACATAAAAGGCCTATCCAGGTCCACGTCGCAGTGGCATTAA			MTKDLSIWVLSVLSCHACGYRYIKGLSRSTSQWH*	MTKDLSIWVLSVLSCHACGYRYIKGLSRSTSQWH*			TTGCTGGATC	ACCATCAATA	0	G	0	MG10677.1	0	0	0
7228	3417	an	AN1715.1	58.m08959	AO070305000031	1	-105	-82					ATGCATGCGGTTACAGGTACATAA	ATGCATGCGGTTACAGGTACATAA			MHAVTGT*	MHAVTGT*			CTGTCATGTC	AAGGCCTATC	0	G	0	MG10677.1	0	0	0
7229	3417	af	AN1715.1	58.m08959	AO070305000031	1			-238	-53			ATGGTGGATTTAGTTTTATACCAGATTCCCTGTTATATCGTCTGTTCCACTGGGTATACCAACAATGACGCCATGCCCACGCATTACACCTTATCGCTGTTGCAAAGTCCGATTATCTTCGCTGCTTTCTGCATCGCTCACGATTATTATCCCTATTGCTTGAATCGTTCGCTTGAGGATCAGTAA		ATGGTGGATTTAGTTTTATACCAGATTCCCTGTTATATCGTCTGTTCCACTGGGTATACCAACAATGACGCCATGCCCACGCATTACACCTTATCGCTGTTGCAAAGTCCGATTATCTTCGCTGCTTTCTGCATCGCTCACGATTATTATCCCTATTGCTTGAATCGTTCGCTTGAGGATCAGTAA		MVDLVLYQIPCYIVCSTGYTNNDAMPTHYTLSLLQSPIIFAAFCIAHDYYPYCLNRSLEDQ*		MVDLVLYQIPCYIVCSTGYTNNDAMPTHYTLSLLQSPIIFAAFCIAHDYYPYCLNRSLEDQ*		ATATTAGGCA	TAACAACTAT	0	G	0	MG10677.1	0	0	0
7230	3417	af	AN1715.1	58.m08959	AO070305000031	1			-174	-76			ATGACGCCATGCCCACGCATTACACCTTATCGCTGTTGCAAAGTCCGATTATCTTCGCTGCTTTCTGCATCGCTCACGATTATTATCCCTATTGCTTGA		ATGACGCCATGCCCACGCATTACACCTTATCGCTGTTGCAAAGTCCGATTATCTTCGCTGCTTTCTGCATCGCTCACGATTATTATCCCTATTGCTTGA		MTPCPRITPYRCCKVRLSSLLSASLTIIIPIA*		MTPCPRITPYRCCKVRLSSLLSASLTIIIPIA*		TATACCAACA	ATCGTTCGCT	0	G	0	MG10677.1	0	0	0
7231	3417	af	AN1715.1	58.m08959	AO070305000031	1			-166	-53			ATGCCCACGCATTACACCTTATCGCTGTTGCAAAGTCCGATTATCTTCGCTGCTTTCTGCATCGCTCACGATTATTATCCCTATTGCTTGAATCGTTCGCTTGAGGATCAGTAA		ATGCCCACGCATTACACCTTATCGCTGTTGCAAAGTCCGATTATCTTCGCTGCTTTCTGCATCGCTCACGATTATTATCCCTATTGCTTGAATCGTTCGCTTGAGGATCAGTAA		MPTHYTLSLLQSPIIFAAFCIAHDYYPYCLNRSLEDQ*		MPTHYTLSLLQSPIIFAAFCIAHDYYPYCLNRSLEDQ*		CAATGACGCC	TAACAACTAT	0	G	0	MG10677.1	0	0	0
7233	3417	ao	AN1715.1	58.m08959	AO070305000031	1					-232	-221	ATGAAGTCATGA			ATGAAGTCATGA	MKS*			MKS*	CTCGGTGGGT	CCAGGAATTT	0	G	0	MG10677.1	0	0	0
7234	3417	ao	AN1715.1	58.m08959	AO070305000031	1					-224	-123	ATGACCAGGAATTTCCCAAAAAGGAAGTTGCGATCAGTTCCAGGCGCACCTTCCCTCCATGACGACATGTTAACGCAGGGCTGCATTTCATCCTACACATAA			ATGACCAGGAATTTCCCAAAAAGGAAGTTGCGATCAGTTCCAGGCGCACCTTCCCTCCATGACGACATGTTAACGCAGGGCTGCATTTCATCCTACACATAA	MTRNFPKRKLRSVPGAPSLHDDMLTQGCISSYT*			MTRNFPKRKLRSVPGAPSLHDDMLTQGCISSYT*	GTATGAAGTC	ATACTCTCTT	0	G	0	MG10677.1	0	0	0
7235	3417	ao	AN1715.1	58.m08959	AO070305000031	1					-166	-152	ATGACGACATGTTAA			ATGACGACATGTTAA	MTTC*			MTTC*	CCTTCCCTCC	CGCAGGGCTG	0	G	0	MG10677.1	0	0	0
7236	3417	ao	AN1715.1	58.m08959	AO070305000031	1					-158	-123	ATGTTAACGCAGGGCTGCATTTCATCCTACACATAA			ATGTTAACGCAGGGCTGCATTTCATCCTACACATAA	MLTQGCISSYT*			MLTQGCISSYT*	CCATGACGAC	ATACTCTCTT	0	G	0	MG10677.1	0	0	0
7258	3425	an	AN2692.1	71.m15179	AO070313000096	1	-150	-127					ATGGACCTCGGAAGCTGTTGTTAG	ATGGACCTCGGAAGCTGTTGTTAG			MDLGSCC*	MDLGSCC*			CATCGTCAAA	AGACTTGATG	0		0	0	0	0	0
7259	3425	af	AN2692.1	71.m15179	AO070313000096	1			-130	-110			ATGGATATCCATTGCATATGA		ATGGATATCCATTGCATATGA		MDIHCI*		MDIHCI*		TATCATCAAA	ATCGATCTGT	0		0	0	0	0	0
7260	3425	ao	AN2692.1	71.m15179	AO070313000096	1					-405	-385	ATGGACCTCATATCTTGTTGA			ATGGACCTCATATCTTGTTGA	MDLISC*			MDLISC*	CATCGCCAAA	ATGAATGTAG	0		0	0	0	0	0
7262	3427	an	AN6857.1	71.m15270	AO070314000074	0	-30	-4					ATGCAACAGTTTCCAGTGCGAACCTAA	ATGCAACAGTTTCCAGTGCGAACCTAA			MQQFPVRT*	MQQFPVRT*			AGACCAGATC	GTCATGCCCA	1		0	0	0	0	0
7285	3431	an	AN4526.1	57.m05980	AO070321000134	1	-178	-143					ATGATGACCGGTGTTCGACGACTGCGTGCCAACTGA	ATGATGACCGGTGTTCGACGACTGCGTGCCAACTGA			MMTGVRRLRAN*	MMTGVRRLRAN*			ATCTGCCTGC	GCCTGCCATT	0	F	0	0	0	0	0
7286	3431	an	AN4526.1	57.m05980	AO070321000134	1	-175	-143					ATGACCGGTGTTCGACGACTGCGTGCCAACTGA	ATGACCGGTGTTCGACGACTGCGTGCCAACTGA			MTGVRRLRAN*	MTGVRRLRAN*			TGCCTGCATG	GCCTGCCATT	0	F	0	0	0	0	0
7287	3431	an	AN4526.1	57.m05980	AO070321000134	1	-56	-15					ATGCGCGCGACCCCTTACTTATTATCGCGAACCAAATGCTAA	ATGCGCGCGACCCCTTACTTATTATCGCGAACCAAATGCTAA			MRATPYLLSRTKC*	MRATPYLLSRTKC*			GAAAGAACTC	TCAATCCATC	1	F	0	0	0	0	0
7288	3431	af	AN4526.1	57.m05980	AO070321000134	1			-236	-96			ATGAAGACCGGTGTTCGGCTTCAGTGTTGCGTTTCACATATCATCCGGTGGTCATTGTCGCTAGTCGCATCGTCAGATTATCGCCAATGGTTCCTGGGTACATGTGGCGTCGCTGTTGTCGTTCTGAGATCATACGGTTGA		ATGAAGACCGGTGTTCGGCTTCAGTGTTGCGTTTCACATATCATCCGGTGGTCATTGTCGCTAGTCGCATCGTCAGATTATCGCCAATGGTTCCTGGGTACATGTGGCGTCGCTGTTGTCGTTCTGAGATCATACGGTTGA		MKTGVRLQCCVSHIIRWSLSLVASSDYRQWFLGTCGVAVVVLRSYG*		MKTGVRLQCCVSHIIRWSLSLVASSDYRQWFLGTCGVAVVVLRSYG*		ATCTACCCGC	ACTTGATCTG	0	F	0	0	0	0	0
7289	3431	af	AN4526.1	57.m05980	AO070321000134	1			-150	-22			ATGGTTCCTGGGTACATGTGGCGTCGCTGTTGTCGTTCTGAGATCATACGGTTGAACTTGATCTGGATAATTCCAGCGAAAGGACTCATGCGCGCTCTTTCAGCTTCAAGCCCTTTCAAATGTATATGA		ATGGTTCCTGGGTACATGTGGCGTCGCTGTTGTCGTTCTGAGATCATACGGTTGAACTTGATCTGGATAATTCCAGCGAAAGGACTCATGCGCGCTCTTTCAGCTTCAAGCCCTTTCAAATGTATATGA		MVPGYMWRRCCRSEIIRLNLIWIIPAKGLMRALSASSPFKCI*		MVPGYMWRRCCRSEIIRLNLIWIIPAKGLMRALSASSPFKCI*		ATTATCGCCA	AGACTAACTC	0	F	0	0	0	0	0
7290	3431	af	AN4526.1	57.m05980	AO070321000134	1			-135	-22			ATGTGGCGTCGCTGTTGTCGTTCTGAGATCATACGGTTGAACTTGATCTGGATAATTCCAGCGAAAGGACTCATGCGCGCTCTTTCAGCTTCAAGCCCTTTCAAATGTATATGA		ATGTGGCGTCGCTGTTGTCGTTCTGAGATCATACGGTTGAACTTGATCTGGATAATTCCAGCGAAAGGACTCATGCGCGCTCTTTCAGCTTCAAGCCCTTTCAAATGTATATGA		MWRRCCRSEIIRLNLIWIIPAKGLMRALSASSPFKCI*		MWRRCCRSEIIRLNLIWIIPAKGLMRALSASSPFKCI*		TCCTGGGTAC	AGACTAACTC	0	F	0	0	0	0	0
7291	3431	af	AN4526.1	57.m05980	AO070321000134	1			-63	-22			ATGCGCGCTCTTTCAGCTTCAAGCCCTTTCAAATGTATATGA		ATGCGCGCTCTTTCAGCTTCAAGCCCTTTCAAATGTATATGA		MRALSASSPFKCI*		MRALSASSPFKCI*		GAAAGGACTC	AGACTAACTC	0	F	0	0	0	0	0
7292	3431	af	AN4526.1	57.m05980	AO070321000134	1			-31	-5			ATGTATATGAAGACTAACTCAGGATAA		ATGTATATGAAGACTAACTCAGGATAA		MYMKTNSG*		MYMKTNSG*		GCCCTTTCAA	CAGCATGTCG	1	F	0	0	0	0	0
7293	3431	af	AN4526.1	57.m05980	AO070321000134	1			-25	-5			ATGAAGACTAACTCAGGATAA		ATGAAGACTAACTCAGGATAA		MKTNSG*		MKTNSG*		TCAAATGTAT	CAGCATGTCG	1	F	0	0	0	0	0
7294	3431	ao	AN4526.1	57.m05980	AO070321000134	1					-237	-196	ATGATGACCGGTGTTCGGCAACGCTGTGACACAGAGATCTGA			ATGATGACCGGTGTTCGGCAACGCTGTGACACAGAGATCTGA	MMTGVRQRCDTEI*			MMTGVRQRCDTEI*	ATACGCCTGC	TGCAATATGC	0	F	0	0	0	0	0
7295	3431	ao	AN4526.1	57.m05980	AO070321000134	1					-234	-196	ATGACCGGTGTTCGGCAACGCTGTGACACAGAGATCTGA			ATGACCGGTGTTCGGCAACGCTGTGACACAGAGATCTGA	MTGVRQRCDTEI*			MTGVRQRCDTEI*	CGCCTGCATG	TGCAATATGC	0	F	0	0	0	0	0
7296	3431	ao	AN4526.1	57.m05980	AO070321000134	1					-196	-176	ATGCAATATGCCCGGCCATGA			ATGCAATATGCCCGGCCATGA	MQYARP*			MQYARP*	CAGAGATCTG	CTCGCGTGTT	0	F	0	0	0	0	0
7297	3431	ao	AN4526.1	57.m05980	AO070321000134	1					-189	-130	ATGCCCGGCCATGACTCGCGTGTTTCTTGGCTTGTTGTCTCCGAACCTGGGTACAGATGA			ATGCCCGGCCATGACTCGCGTGTTTCTTGGCTTGTTGTCTCCGAACCTGGGTACAGATGA	MPGHDSRVSWLVVSEPGYR*			MPGHDSRVSWLVVSEPGYR*	CTGATGCAAT	TGTGGCAGCA	0	F	0	0	0	0	0
7298	3431	ao	AN4526.1	57.m05980	AO070321000134	1					-179	-93	ATGACTCGCGTGTTTCTTGGCTTGTTGTCTCCGAACCTGGGTACAGATGATGTGGCAGCAGTTGTCGTTCTGAGAATATACGGTTGA			ATGACTCGCGTGTTTCTTGGCTTGTTGTCTCCGAACCTGGGTACAGATGATGTGGCAGCAGTTGTCGTTCTGAGAATATACGGTTGA	MTRVFLGLLSPNLGTDDVAAVVVLRIYG*			MTRVFLGLLSPNLGTDDVAAVVVLRIYG*	ATGCCCGGCC	ACTTGATCTG	0	F	0	0	0	0	0
7299	3431	ao	AN4526.1	57.m05980	AO070321000134	1					-133	-107	ATGATGTGGCAGCAGTTGTCGTTCTGA			ATGATGTGGCAGCAGTTGTCGTTCTGA	MMWQQLSF*			MMWQQLSF*	CTGGGTACAG	GAATATACGG	0	F	0	0	0	0	0
7300	3431	ao	AN4526.1	57.m05980	AO070321000134	1					-130	-107	ATGTGGCAGCAGTTGTCGTTCTGA			ATGTGGCAGCAGTTGTCGTTCTGA	MWQQLSF*			MWQQLSF*	GGTACAGATG	GAATATACGG	0	F	0	0	0	0	0
7301	3431	ao	AN4526.1	57.m05980	AO070321000134	1					-60	-22	ATGCGCGCTTTTTTAGCCCTCAGTTTCTTCATGAGCTGA			ATGCGCGCTTTTTTAGCCCTCAGTTTCTTCATGAGCTGA	MRAFLALSFFMS*			MRAFLALSFFMS*	GAAAGGACTC	TACTAACTGG	1	F	0	0	0	0	0
7321	3441	an	AN4706.1	71.m15694	AO070329000170	0	-38						ATGCATATAATGAGCTGTCAACGATACCCACAGCAATAA	ATGCATATAATGAGCTGTCAACGATACCCACAGCAATAA			MHIMSCQRYPQQ*	MHIMSCQRYPQQ*			AGCCTTTTTG	TGCTCCCCTC	1	Z	0	0	0	0	0
7322	3441	an	AN4706.1	71.m15694	AO070329000170	0	-29						ATGAGCTGTCAACGATACCCACAGCAATAA	ATGAGCTGTCAACGATACCCACAGCAATAA			MSCQRYPQQ*	MSCQRYPQQ*			GATGCATATA	TGCTCCCCTC	1	Z	0	0	0	0	0
7330	3441	af	AN4706.1	71.m15694	AO070329000170	0			-27	-13			ATGATGCTCCATTGA		ATGATGCTCCATTGA		MMLH*		MMLH*		CTGTTTACAA	ATCAACGACA	1	Z	0	0	0	0	0
7331	3441	af	AN4706.1	71.m15694	AO070329000170	0			-24	-13			ATGCTCCATTGA		ATGCTCCATTGA		MLH*		MLH*		TTTACAAATG	ATCAACGACA	1	Z	0	0	0	0	0
7333	3441	ao	AN4706.1	71.m15694	AO070329000170	0					-27	-13	ATGATGACCTATTGA			ATGATGACCTATTGA	MMTY*			MMTY*	AAACACTTGA	ATTAACGACG	1	Z	0	0	0	0	0
7334	3441	ao	AN4706.1	71.m15694	AO070329000170	0					-24	-13	ATGACCTATTGA			ATGACCTATTGA	MTY*			MTY*	CACTTGAATG	ATTAACGACG	1	Z	0	0	0	0	0
7336	3442	af	AN1208.1	70.m15013	AO070331000214	1			-188	-33			ATGACACATCACGGATGCGGTGACTTTAATCAAGCAAATTCCACCACCAATCAGGCCCTTCGAACAGGGTTCAGGACGCGTACTGCACGTCCTCTCTGGCGACCTGCGTCAGTCTTCAACGCCCGCAACGCCCAGGATAATCATTCGGCCTTCTGA		ATGACACATCACGGATGCGGTGACTTTAATCAAGCAAATTCCACCACCAATCAGGCCCTTCGAACAGGGTTCAGGACGCGTACTGCACGTCCTCTCTGGCGACCTGCGTCAGTCTTCAACGCCCGCAACGCCCAGGATAATCATTCGGCCTTCTGA		MTHHGCGDFNQANSTTNQALRTGFRTRTARPLWRPASVFNARNAQDNHSAF*		MTHHGCGDFNQANSTTNQALRTGFRTRTARPLWRPASVFNARNAQDNHSAF*		CTTTCCTTGT	AATCTGGGTC	0	A	FG01337.1	MG05616.1	NCU02966.1	0	0
7337	3442	ao	AN1208.1	70.m15013	AO070331000214	1					-171	-160	ATGAGGCAGTAA			ATGAGGCAGTAA	MRQ*			MRQ*	TAGATTTTGA	TTTGCTGCTA	0	A	FG01337.1	MG05616.1	NCU02966.1	0	0
7343	3447	af	AN0304.1	54.m06978	AO070334000034	1			-111	-91			ATGCTCTTTGAAAGAGCTTGA		ATGCTCTTTGAAAGAGCTTGA		MLFERA*		MLFERA*		CCAGGCATAT	GTTCTCAAGC	0	P	0	0	0	0	0
7348	3451	conserved	AN2905.1	59.m08756	AO070338000100	0	-23	-12	-23	-12	-23	-12	ATGGGTTGGTAA	ATGGGTTGGTAA	ATGGGTTGGTAA	ATGGGTTGGTAA	MGW*	MGW*	MGW*	MGW*	sdCyTTGCAG	rACCrCACGA	1	K	0	0	0	0	0
7359	3451	ao	AN2905.1	59.m08756	AO070338000100	0					-58	-41	ATGTCTCATAAAGTCTGA			ATGTCTCATAAAGTCTGA	MSHKV*			MSHKV*	CTCTATTCTT	CAGCTTTCAC	1	K	0	0	0	0	0
7385	3464	af	AN3586.1	58.m07385	AO070342000163	0			-43	-8			ATGATCGACTTTCAGACTGTACTCCGTACGCTTTAG		ATGATCGACTTTCAGACTGTACTCCGTACGCTTTAG		MIDFQTVLRTL*		MIDFQTVLRTL*		AGGTGATCTG	GCTCACCATG	1	HC	0	0	0	0	0
7435	3480	af	AN3157.1	59.m08548	AO070256000037	1			-65	-48			ATGGCGGTTTTTGGATGA		ATGGCGGTTTTTGGATGA		MAVFG*		MAVFG*		TCGCCCGATC	TTGTTTATGT	0	P	0	0	0	YPR003C	0
7436	3480	af	AN3157.1	59.m08548	AO070256000037	1			-41	-24			ATGTCCCAGGATTATTGA		ATGTCCCAGGATTATTGA		MSQDY*		MSQDY*		ATGATTGTTT	GTGATCATTA	1	P	0	0	0	YPR003C	0
7437	3480	ao	AN3157.1	59.m08548	AO070256000037	1					-259	-212	ATGATATTTACTTACTTCTTCCGTCTTCATGCTTCCCATCCCCGCTAA			ATGATATTTACTTACTTCTTCCGTCTTCATGCTTCCCATCCCCGCTAA	MIFTYFFRLHASHPR*			MIFTYFFRLHASHPR*	CTCTTGAATA	CTACCAATCG	0	P	0	0	0	YPR003C	0
7438	3480	ao	AN3157.1	59.m08548	AO070256000037	1					-231	-199	ATGCTTCCCATCCCCGCTAACTACCAATCGTAG			ATGCTTCCCATCCCCGCTAACTACCAATCGTAG	MLPIPANYQS*			MLPIPANYQS*	TTCCGTCTTC	CCACCGCCTG	0	P	0	0	0	YPR003C	0
7439	3480	ao	AN3157.1	59.m08548	AO070256000037	1					-65	-33	ATGGCGAGTGCTGAGTTACTCTGCACATCATAG			ATGGCGAGTGCTGAGTTACTCTGCACATCATAG	MASAELLCTS*			MASAELLCTS*	CGTAGCACTC	CGATACTGAC	0	P	0	0	0	YPR003C	0
7454	3485	af	AN6532.1	62.m03120	AO070270000032	0			-52	-35			ATGGACACACTCCCCTGA		ATGGACACACTCCCCTGA		MDTLP*		MDTLP*		CAGCCATGGC	CTCCCATATC	1	IQR	0	MG08857.1	NCU00148.1	0	0
7461	3491	an	AN7495.1	57.m05848	AO070287000021	1	-54	-28					ATGTTTGATTATCGTGATCTGGTTTAG	ATGTTTGATTATCGTGATCTGGTTTAG			MFDYRDLV*	MFDYRDLV*			ACGCAAATTT	CAACGGTTTC	1	AD	0	0	0	0	0
7472	3496	af	AN2295.1	71.m15944	AO070295000075	1			-113	-102			ATGTCATTTTGA		ATGTCATTTTGA		MSF*		MSF*		GAAGTGTCCC	TATATTCTGC	0	C	0	MG05480.1	0	0	0
7501	3503	an	AN3827.1	58.m07803	AO070305000064	0	-56	-3					ATGACTAGAAGACCTTCCTCCCATCATTCTTCCATTCTACCATCAAAGTCGTAA	ATGACTAGAAGACCTTCCTCCCATCATTCTTCCATTCTACCATCAAAGTCGTAA			MTRRPSSHHSSILPSKS*	MTRRPSSHHSSILPSKS*			AAATTTTTGG	TCATGGCGAA	1	A	0	0	0	YGR103W	0
7504	3507	an	AN8242.1	53.m03728	AO070310000066	0	-29	-18					ATGCTGTCTTGA	ATGCTGTCTTGA			MLS*	MLS*			CTAGTAGTTT	TGCAACCTAT	1	V	0	0	0	0	0
7508	3511	an	AN1016.1	70.m15234	AO070312000002	0	-39	-4					ATGGTTCCACCGGACGCTGTCGAAGGCAGTATCTAG	ATGGTTCCACCGGACGCTGTCGAAGGCAGTATCTAG			MVPPDAVEGSI*	MVPPDAVEGSI*			CGAACAGCGT	AAAATGGGGT	1	DT	0	0	0	0	0
7547	3522	ao	AN8126.1	70.m15699	AO070322000018	0					-46	-11	ATGTCAGTCTCTAGCGGCATCGCGTGCAGTCACTAA			ATGTCAGTCTCTAGCGGCATCGCGTGCAGTCACTAA	MSVSSGIACSH*			MSVSSGIACSH*	ATACAAACCC	ACTCCAGACC	1	R	0	0	0	0	0
7557	3529	af	AN4003.1	54.m06586	AO070328000160	0			-30	-7			ATGAACTTATTTAGCAGAGAATAA		ATGAACTTATTTAGCAGAGAATAA		MNLFSRE*		MNLFSRE*		TCCCATCCAT	AAGCAAATGG	1	CE	0	0	0	0	0
7575	3531	af	AN8066.1	53.m03917	AO070330000022	0			-51	-37			ATGTGTGACTGCTGA		ATGTGTGACTGCTGA		MCDC*		MCDC*		ATCGCGAGAC	AGCTTGAATT	1	J	0	MG00308.1	NCU09571.1	0	0
7590	3538	an	AN5013.1	59.m08664	AO070334000121	1	-205	-179					ATGATCTCGTTATGTGATATCTCATGA	ATGATCTCGTTATGTGATATCTCATGA			MISLCDIS*	MISLCDIS*			GTCCAACGTC	ACCTCCTCCG	0	L	0	MG06005.1	0	0	0
7591	3538	an	AN5013.1	59.m08664	AO070334000121	1	-182	-120					ATGAACCTCCTCCGCTACAATAATCAAGTATCCGGACAGCTAAACAATCGCGGAGACTCCTGA	ATGAACCTCCTCCGCTACAATAATCAAGTATCCGGACAGCTAAACAATCGCGGAGACTCCTGA			MNLLRYNNQVSGQLNNRGDS*	MNLLRYNNQVSGQLNNRGDS*			GTGATATCTC	GCTACGTCTT	0	L	0	MG06005.1	0	0	0
7592	3538	an	AN5013.1	59.m08664	AO070334000121	1	-107	-90					ATGAGCGCTAATCTCTGA	ATGAGCGCTAATCTCTGA			MSANL*	MSANL*			TACGTCTTCT	ATTCTGTACT	0	L	0	MG06005.1	0	0	0
7595	3542	af	AN5215.1	69.m14913	AO070337000264	0			-60	-46			ATGCGTGATTCCTGA		ATGCGTGATTCCTGA		MRDS*		MRDS*		GAATTGATCA	ATTAGATTTT	1	R	FG00848.1	0	NCU07492.1	YPL183C	YPL183C
7627	3551	an	AN2099.1	57.m05801	AO070341000258	1	-96	-64					ATGTATGTCAAAGCAACATCTTATCTTGACTAA	ATGTATGTCAAAGCAACATCTTATCTTGACTAA			MYVKATSYLD*	MYVKATSYLD*			TCAACTCCTT	GTACAGTTCG	0		0	0	0	0	0
7628	3551	an	AN2099.1	57.m05801	AO070341000258	1	-92	-24					ATGTCAAAGCAACATCTTATCTTGACTAAGTACAGTTCGTCAGAATTGACAGCACCTTTTCAACAATAA	ATGTCAAAGCAACATCTTATCTTGACTAAGTACAGTTCGTCAGAATTGACAGCACCTTTTCAACAATAA			MSKQHLILTKYSSSELTAPFQQ*	MSKQHLILTKYSSSELTAPFQQ*			CTCCTTATGT	ACAATATCAG	0		0	0	0	0	0
7659	3558	af	AN0661.1	70.m15264	AO070343000559	0			-60	-49			ATGAATCCCTGA		ATGAATCCCTGA		MNP*		MNP*		AAAACGATCC	GACTGCATCA	1		0	0	0	0	0
7699	3569	an	AN4360.1	58.m07961	AO070261000003	0	-31	-17					ATGAGTCTGAAGTGA	ATGAGTCTGAAGTGA			MSLK*	MSLK*			GTTTACAGAC	TCCTAGATTA	1		0	0	0	0	0
7702	3569	af	AN4360.1	58.m07961	AO070261000003	0			-48	-28			ATGGTTATGCTTAGTCAATAG		ATGGTTATGCTTAGTCAATAG		MVMLSQ*		MVMLSQ*		ACTCAGCCTC	TATAAAGAGG	1		0	0	0	0	0
7703	3569	af	AN4360.1	58.m07961	AO070261000003	0			-42	-28			ATGCTTAGTCAATAG		ATGCTTAGTCAATAG		MLSQ*		MLSQ*		CCTCATGGTT	TATAAAGAGG	1		0	0	0	0	0
7709	3569	ao	AN4360.1	58.m07961	AO070261000003	0					-54	-28	ATGCGCAAGAACTCCGTGCAACTATAG			ATGCGCAAGAACTCCGTGCAACTATAG	MRKNSVQL*			MRKNSVQL*	CGGCGGGATA	ACGCCACATC	1		0	0	0	0	0
7711	3573	ao	AN6934.1	62.m03423	AO070269000048	0					-40	-20	ATGTTCCTTGCTGAGTTCTAG			ATGTTCCTTGCTGAGTTCTAG	MFLAEF*			MFLAEF*	TGCCCTCAGA	AAAGACGCTC	1	G	0	0	0	0	0
7735	3585	an	AN2290.1	71.m15938	AO070295000069	0	-56	-27					ATGGTCCCATGCTCGAAACCTGGCTTCTGA	ATGGTCCCATGCTCGAAACCTGGCTTCTGA			MVPCSKPGF*	MVPCSKPGF*			CGCATAGTGG	CGCTTCTAAT	1	R	0	0	0	0	0
7736	3585	an	AN2290.1	71.m15938	AO070295000069	0	-48	-10					ATGCTCGAAACCTGGCTTCTGACGCTTCTAATCCTCTAG	ATGCTCGAAACCTGGCTTCTGACGCTTCTAATCCTCTAG			MLETWLLTLLIL*	MLETWLLTLLIL*			GGATGGTCCC	GTCACGAATA	1	R	0	0	0	0	0
7820	3610	ao	AN4639.1	57.m05552	AO070321000194	0					-53	-39	ATGATACCTGCATAA			ATGATACCTGCATAA	MIPA*			MIPA*	CTTGCACACG	TGAAGGATCC	1	D	0	MG02874.1	0	0	0
7833	3616	af	AN3923.1	69.m15006	AO070324000119	0			-33	-1			ATGAGAGTTGGATCTGTATTCATACCAAGCTGA		ATGAGAGTTGGATCTGTATTCATACCAAGCTGA		MRVGSVFIPS*		MRVGSVFIPS*		GGGGAGCTGA	ATGATGCTCA	1	O	0	0	0	0	0
7834	3616	ao	AN3923.1	69.m15006	AO070324000119	0					-36	-13	ATGCGTCTCGTCTTCTCAGACTAG			ATGCGTCTCGTCTTCTCAGACTAG	MRLVFSD*			MRLVFSD*	TGCAAATTGG	AGACGATAAA	1	O	0	0	0	0	0
7835	3619	an	AN6634.1	62.m03229	AO070326000086	0	-55	-29					ATGGTTGCTTGGATAACTTCTCTGTAG	ATGGTTGCTTGGATAACTTCTCTGTAG			MVAWITSL*	MVAWITSL*			ACCTGACGCG	TCTCAGACAT	1		0	0	0	0	0
7836	3619	an	AN6634.1	62.m03229	AO070326000086	0	-20	-6					ATGATTTCTTCATAG	ATGATTTCTTCATAG			MISS*	MISS*			AGTCTCAGAC	ACGGCATGCC	1		0	0	0	0	0
7841	3619	ao	AN6634.1	62.m03229	AO070326000086	0					-56	-33	ATGGCCCGCGACAACAAAATTTGA			ATGGCCCGCGACAACAAAATTTGA	MARDNKI*			MARDNKI*	CTCCCATCCA	GTGACAAGAC	1		0	0	0	0	0
7846	3622	an	AN4050.1	54.m06541	AO070328000106	1	-215	-171					ATGAGTGGCTCACTAGCACTCCTGGCTTCACGTTTCGCTAATTAA	ATGAGTGGCTCACTAGCACTCCTGGCTTCACGTTTCGCTAATTAA			MSGSLALLASRFAN*	MSGSLALLASRFAN*			TCTTTCTCAT	TGGATAGGAC	0	C	0	MG00652.1	NCU02056.1	0	0
7847	3622	an	AN4050.1	54.m06541	AO070328000106	1	-171	-139					ATGGATAGGACCTTCACAGTGCCTTCCGGATAA	ATGGATAGGACCTTCACAGTGCCTTCCGGATAA			MDRTFTVPSG*	MDRTFTVPSG*			TCGCTAATTA	AGGTTCTGGG	0	C	0	MG00652.1	NCU02056.1	0	0
7848	3622	an	AN4050.1	54.m06541	AO070328000106	1	-114	-100					ATGGGCCATACTTGA	ATGGGCCATACTTGA			MGHT*	MGHT*			TGAATGGGTC	GAGCAGAGCT	0	C	0	MG00652.1	NCU02056.1	0	0
7849	3622	ao	AN4050.1	54.m06541	AO070328000106	1					-232	-89	ATGCTTATTGCGAACCGTCTGTCTTTTATGGCTTTTATGGTGGCGCCGTCGGTCTGTGATCATCCTTTGCTCTCCCGCCCTTCTTCCCCTTTTGTATATAATACACCTCTCCCCCCTCGCTACCCTACTTTAGTTCCTTTATAA			ATGCTTATTGCGAACCGTCTGTCTTTTATGGCTTTTATGGTGGCGCCGTCGGTCTGTGATCATCCTTTGCTCTCCCGCCCTTCTTCCCCTTTTGTATATAATACACCTCTCCCCCCTCGCTACCCTACTTTAGTTCCTTTATAA	MLIANRLSFMAFMVAPSVCDHPLLSRPSSPFVYNTPLPPRYPTLVPL*			MLIANRLSFMAFMVAPSVCDHPLLSRPSSPFVYNTPLPPRYPTLVPL*	TCCAACGGGT	AGCCGTTCAC	0	C	0	MG00652.1	NCU02056.1	0	0
7850	3622	ao	AN4050.1	54.m06541	AO070328000106	1					-205	-89	ATGGCTTTTATGGTGGCGCCGTCGGTCTGTGATCATCCTTTGCTCTCCCGCCCTTCTTCCCCTTTTGTATATAATACACCTCTCCCCCCTCGCTACCCTACTTTAGTTCCTTTATAA			ATGGCTTTTATGGTGGCGCCGTCGGTCTGTGATCATCCTTTGCTCTCCCGCCCTTCTTCCCCTTTTGTATATAATACACCTCTCCCCCCTCGCTACCCTACTTTAGTTCCTTTATAA	MAFMVAPSVCDHPLLSRPSSPFVYNTPLPPRYPTLVPL*			MAFMVAPSVCDHPLLSRPSSPFVYNTPLPPRYPTLVPL*	TCTGTCTTTT	AGCCGTTCAC	0	C	0	MG00652.1	NCU02056.1	0	0
7851	3622	ao	AN4050.1	54.m06541	AO070328000106	1					-196	-89	ATGGTGGCGCCGTCGGTCTGTGATCATCCTTTGCTCTCCCGCCCTTCTTCCCCTTTTGTATATAATACACCTCTCCCCCCTCGCTACCCTACTTTAGTTCCTTTATAA			ATGGTGGCGCCGTCGGTCTGTGATCATCCTTTGCTCTCCCGCCCTTCTTCCCCTTTTGTATATAATACACCTCTCCCCCCTCGCTACCCTACTTTAGTTCCTTTATAA	MVAPSVCDHPLLSRPSSPFVYNTPLPPRYPTLVPL*			MVAPSVCDHPLLSRPSSPFVYNTPLPPRYPTLVPL*	TATGGCTTTT	AGCCGTTCAC	0	C	0	MG00652.1	NCU02056.1	0	0
7869	3633	af	AN2880.1	59.m08727	AO070338000135	0			-24	-13			ATGCCGCAGTAG		ATGCCGCAGTAG		MPQ*		MPQ*		CTCTCTGTCC	ATTTTAGATA	1	R	0	0	0	0	0
7871	3633	ao	AN2880.1	59.m08727	AO070338000135	0					-25	-14	ATGTCGCCTTGA			ATGTCGCCTTGA	MSP*			MSP*	CCCTTAATCC	CTGTCAAGGC	1	R	0	0	0	0	0
7882	3635	ao	AN6136.1	72.m19029	AO070340000066	0					-60	-37	ATGATATCTTGCTATCGCTATTAA			ATGATATCTTGCTATCGCTATTAA	MISCYRY*			MISCYRY*	AACTATAGAT	TGACGATCGG	1	A	0	0	0	0	0
7883	3636	af	AN5972.1	72.m19188	AO070340000330	1			-203	-102			ATGTTTGTGACAACTCCGCGGGCCATTTTGTCCGGGGACTCTCGATATTTTATTTGTCCACCACTTTTTCATCTCAAACCCTCTCACTCAGGTCCTCTTTAA		ATGTTTGTGACAACTCCGCGGGCCATTTTGTCCGGGGACTCTCGATATTTTATTTGTCCACCACTTTTTCATCTCAAACCCTCTCACTCAGGTCCTCTTTAA		MFVTTPRAILSGDSRYFICPPLFHLKPSHSGPL*		MFVTTPRAILSGDSRYFICPPLFHLKPSHSGPL*		CAGTCCCTGA	TCCCAAGCTG	0	U	0	0	0	YGL137W	YGL137W
7884	3637	an	AN3958.1	69.m14962	AO070341000080	1	-56	-42					ATGGAATATTTATGA	ATGGAATATTTATGA			MEYL*	MEYL*			CGTCGAAATC	CTGCATGATA	1	A	0	0	0	0	0
7885	3637	an	AN3958.1	69.m14962	AO070341000080	1	-45	-34					ATGACTGCATGA	ATGACTGCATGA			MTA*	MTA*			TGGAATATTT	TATAAGCTGT	1	A	0	0	0	0	0
7886	3637	ao	AN3958.1	69.m14962	AO070341000080	1					-406	-386	ATGTTAAATGCAGTGAACTGA			ATGTTAAATGCAGTGAACTGA	MLNAVN*			MLNAVN*	ACTGGGACTA	TTCACCGAGT	0	A	0	0	0	0	0
7939	3651	conserved	AN1349.1	70.m14884	AO070237000012	1	-418	-401	-398	-381	-430	-413	ATGAwmmArTCkyTyTGA	ATGATCAAATCTCTTTGA	ATGAAACAGTCGTTTTGA	ATGAACAAGTCGCTCTGA	MikSl*	MIKSL*	MKQSF*	MNKSL*	srsAAAAryC	CmAymGTGTA	0	A	0	0	0	0	0
7940	3651	conserved	AN1349.1	70.m14884	AO070237000012	1	-254	-201	-250	-197	-260	-207	ATGGCGAAyTwCsyTkTyhmrAGATATGyCGTCwTTCyTTTTkGGCTTGTGTGA	ATGGCGAATTACGTTGTCTCAAGATATGTCGTCTTTCCTTTTTGGCTTGTGTGA	ATGGCGAACTTCCCTTTTCAGAGATATGTCGTCATTCTTTTTGGGCTTGTGTGA	ATGGCGAATTACGTTTTCAAGAGATATGCCGTCTTTCTTTTTGGGCTTGTGTGA	MANyvvsRYvVfpFwLV*	MANYVVSRYVVFPFWLV*	MANFPFQRYVVILFGLV*	MANYVFKRYAVFLFGLV*	AGCTTTCChT	AGTGGGATyT	0	A	0	0	0	0	0
7942	3651	an	AN1349.1	70.m14884	AO070237000012	1	-229	-146					ATGTCGTCTTTCCTTTTTGGCTTGTGTGAAGTGGGATTTCTTAGTGGCCTTTTCTCCATTCGAATTTCGGTTTCGTCGTCTTGA	ATGTCGTCTTTCCTTTTTGGCTTGTGTGAAGTGGGATTTCTTAGTGGCCTTTTCTCCATTCGAATTTCGGTTTCGTCGTCTTGA			MSSFLFGLCEVGFLSGLFSIRISVSSS*	MSSFLFGLCEVGFLSGLFSIRISVSSS*			GTCTCAAGAT	AATCCTGCAA	0	A	0	0	0	0	0
7943	3651	af	AN1349.1	70.m14884	AO070237000012	1			-533	-513			ATGACCCTTCATCTTTATTAG		ATGACCCTTCATCTTTATTAG		MTLHLY*		MTLHLY*		TGGGCTTTTT	CAGGGTAACA	0	A	0	0	0	0	0
7945	3651	af	AN1349.1	70.m14884	AO070237000012	1			-225	-142			ATGTCGTCATTCTTTTTGGGCTTGTGTGAAGTGGGATTTCTGAGTGGCTTCTTCTCAATTCGAAATTCGGTTTCGTCCTGTTAA		ATGTCGTCATTCTTTTTGGGCTTGTGTGAAGTGGGATTTCTGAGTGGCTTCTTCTCAATTCGAAATTCGGTTTCGTCCTGTTAA		MSSFFLGLCEVGFLSGFFSIRNSVSSC*		MSSFFLGLCEVGFLSGFFSIRNSVSSC*		TTTCAGAGAT	AAATCGAGCA	0	A	0	0	0	0	0
7946	3651	ao	AN1349.1	70.m14884	AO070237000012	1					-442	-413	ATGGGAAAAGCCATGAACAAGTCGCTCTGA			ATGGGAAAAGCCATGAACAAGTCGCTCTGA	MGKAMNKSL*			MGKAMNKSL*	AAAATAATCA	CCATCGTGTA	0	A	0	0	0	0	0
7947	3651	ao	AN1349.1	70.m14884	AO070237000012	1					-235	-173	ATGCCGTCTTTCTTTTTGGGCTTGTGTGAAGTGGGATCTTTGAGTGGCTTATTGTCGTCTTAA			ATGCCGTCTTTCTTTTTGGGCTTGTGTGAAGTGGGATCTTTGAGTGGCTTATTGTCGTCTTAA	MPSFFLGLCEVGSLSGLLSS*			MPSFFLGLCEVGSLSGLLSS*	TTCAAGAGAT	ATTTCGGTTT	0	A	0	0	0	0	0
7948	3652	an	AN9421.1	55.m02908	AO070242000003	1	-346	-260					ATGGAAGCGGCGACTTCCCTTTCTGAACTCAACAACGGAAAACAGTACGCAGACGCCGAAAGAGAGAAAAAAAAAGGGCGATATTAG	ATGGAAGCGGCGACTTCCCTTTCTGAACTCAACAACGGAAAACAGTACGCAGACGCCGAAAGAGAGAAAAAAAAAGGGCGATATTAG			MEAATSLSELNNGKQYADAEREKKKGRY*	MEAATSLSELNNGKQYADAEREKKKGRY*			GCCATTACCC	GGCCGTCGCA	0	O	0	0	0	0	0
7949	3652	an	AN9421.1	55.m02908	AO070242000003	1	-224	-105					ATGCCCCGTCAGGTGTTCATTCCTAGGTCTCCCCGACTCGATGAATTGAACTGTGACTCCCGACACCTTCTGTTGAGGTTTCCAGCGTGGTACTCCCGTCTTTCGAGGCGGGAAATTTGA	ATGCCCCGTCAGGTGTTCATTCCTAGGTCTCCCCGACTCGATGAATTGAACTGTGACTCCCGACACCTTCTGTTGAGGTTTCCAGCGTGGTACTCCCGTCTTTCGAGGCGGGAAATTTGA			MPRQVFIPRSPRLDELNCDSRHLLLRFPAWYSRLSRREI*	MPRQVFIPRSPRLDELNCDSRHLLLRFPAWYSRLSRREI*			GCTAACAGTG	AACTACAATT	0	O	0	0	0	0	0
7950	3652	af	AN9421.1	55.m02908	AO070242000003	1			-398	-318			ATGAGAACATACAGAGGGACTCAGTGCCAAACAGAGAAGGGCAAGAAGGAAGATAGAGAACCCTTCAGCAAGTTGACCTAA		ATGAGAACATACAGAGGGACTCAGTGCCAAACAGAGAAGGGCAAGAAGGAAGATAGAGAACCCTTCAGCAAGTTGACCTAA		MRTYRGTQCQTEKGKKEDREPFSKLT*		MRTYRGTQCQTEKGKKEDREPFSKLT*		CTTGGAGAGT	ACACACATCA	0	O	0	0	0	0	0
7951	3652	af	AN9421.1	55.m02908	AO070242000003	1			-308	-273			ATGTTGAGTGATGACTCCCCAGATGCACATCTCTAA		ATGTTGAGTGATGACTCCCCAGATGCACATCTCTAA		MLSDDSPDAHL*		MLSDDSPDAHL*		AACACACATC	GTATAATTGG	0	O	0	0	0	0	0
7952	3652	af	AN9421.1	55.m02908	AO070242000003	1			-298	-113			ATGACTCCCCAGATGCACATCTCTAAGTATAATTGGAGTCATACGCTTCCCCCAGATGAGTGGATATTCACAATCGTCATCTATAAAAGCATCGCTACCTTTAAAGGTCTCCATACACTCTCGAACTGTCTGGAAAGAACTGAAATCTTACTCGCAGTGATCTACCTATCCTCTCTCGGTCAATGA		ATGACTCCCCAGATGCACATCTCTAAGTATAATTGGAGTCATACGCTTCCCCCAGATGAGTGGATATTCACAATCGTCATCTATAAAAGCATCGCTACCTTTAAAGGTCTCCATACACTCTCGAACTGTCTGGAAAGAACTGAAATCTTACTCGCAGTGATCTACCTATCCTCTCTCGGTCAATGA		MTPQMHISKYNWSHTLPPDEWIFTIVIYKSIATFKGLHTLSNCLERTEILLAVIYLSSLGQ*		MTPQMHISKYNWSHTLPPDEWIFTIVIYKSIATFKGLHTLSNCLERTEILLAVIYLSSLGQ*		ATGTTGAGTG	ACAAACAATC	0	O	0	0	0	0	0
7953	3652	af	AN9421.1	55.m02908	AO070242000003	1			-286	-113			ATGCACATCTCTAAGTATAATTGGAGTCATACGCTTCCCCCAGATGAGTGGATATTCACAATCGTCATCTATAAAAGCATCGCTACCTTTAAAGGTCTCCATACACTCTCGAACTGTCTGGAAAGAACTGAAATCTTACTCGCAGTGATCTACCTATCCTCTCTCGGTCAATGA		ATGCACATCTCTAAGTATAATTGGAGTCATACGCTTCCCCCAGATGAGTGGATATTCACAATCGTCATCTATAAAAGCATCGCTACCTTTAAAGGTCTCCATACACTCTCGAACTGTCTGGAAAGAACTGAAATCTTACTCGCAGTGATCTACCTATCCTCTCTCGGTCAATGA		MHISKYNWSHTLPPDEWIFTIVIYKSIATFKGLHTLSNCLERTEILLAVIYLSSLGQ*		MHISKYNWSHTLPPDEWIFTIVIYKSIATFKGLHTLSNCLERTEILLAVIYLSSLGQ*		GACTCCCCAG	ACAAACAATC	0	O	0	0	0	0	0
7954	3652	af	AN9421.1	55.m02908	AO070242000003	1			-243	-139			ATGAGTGGATATTCACAATCGTCATCTATAAAAGCATCGCTACCTTTAAAGGTCTCCATACACTCTCGAACTGTCTGGAAAGAACTGAAATCTTACTCGCAGTGA		ATGAGTGGATATTCACAATCGTCATCTATAAAAGCATCGCTACCTTTAAAGGTCTCCATACACTCTCGAACTGTCTGGAAAGAACTGAAATCTTACTCGCAGTGA		MSGYSQSSSIKASLPLKVSIHSRTVWKELKSYSQ*		MSGYSQSSSIKASLPLKVSIHSRTVWKELKSYSQ*		CTTCCCCCAG	TCTACCTATC	0	O	0	0	0	0	0
7955	3652	af	AN9421.1	55.m02908	AO070242000003	1			-116	-57			ATGAACAAACAATCGGAGTGGTCCCTTCCACCTTTCAATACGTTCATTTTCTTTTATTAG		ATGAACAAACAATCGGAGTGGTCCCTTCCACCTTTCAATACGTTCATTTTCTTTTATTAG		MNKQSEWSLPPFNTFIFFY*		MNKQSEWSLPPFNTFIFFY*		CTCTCGGTCA	TAACTGATAC	0	O	0	0	0	0	0
7956	3652	ao	AN9421.1	55.m02908	AO070242000003	1					-543	-481	ATGTGGAGTATCGTCAACGGCATTCTAGACTCAAATGCGATATACGTCCCTGGTTTACAATAA			ATGTGGAGTATCGTCAACGGCATTCTAGACTCAAATGCGATATACGTCCCTGGTTTACAATAA	MWSIVNGILDSNAIYVPGLQ*			MWSIVNGILDSNAIYVPGLQ*	TTACGGAGTA	GAACCATTCT	0	O	0	0	0	0	0
7957	3652	ao	AN9421.1	55.m02908	AO070242000003	1					-509	-438	ATGCGATATACGTCCCTGGTTTACAATAAGAACCATTCTTTCAGCAGCCCCAGGCGCAGCTGCCGCCAGTGA			ATGCGATATACGTCCCTGGTTTACAATAAGAACCATTCTTTCAGCAGCCCCAGGCGCAGCTGCCGCCAGTGA	MRYTSLVYNKNHSFSSPRRSCRQ*			MRYTSLVYNKNHSFSSPRRSCRQ*	CTAGACTCAA	TGATCCACCG	0	O	0	0	0	0	0
7958	3652	ao	AN9421.1	55.m02908	AO070242000003	1					-438	-340	ATGATCCACCGCGTTCGCATTTTGGTGTGTGCCTTGTATCGCTACCCTGAAGTAGATGAATCGGGTTGCTCCCATCGCTTTTGCGTGTTAGAGCCATAA			ATGATCCACCGCGTTCGCATTTTGGTGTGTGCCTTGTATCGCTACCCTGAAGTAGATGAATCGGGTTGCTCCCATCGCTTTTGCGTGTTAGAGCCATAA	MIHRVRILVCALYRYPEVDESGCSHRFCVLEP*			MIHRVRILVCALYRYPEVDESGCSHRFCVLEP*	GCCGCCAGTG	CGTTGCTTCA	0	O	0	0	0	0	0
7959	3652	ao	AN9421.1	55.m02908	AO070242000003	1					-383	-348	ATGAATCGGGTTGCTCCCATCGCTTTTGCGTGTTAG			ATGAATCGGGTTGCTCCCATCGCTTTTGCGTGTTAG	MNRVAPIAFAC*			MNRVAPIAFAC*	CCTGAAGTAG	AGCCATAACG	0	O	0	0	0	0	0
7995	3667	af	AN1706.1	58.m07796	AO070305000044	0			-33	-19			ATGAAAGCCTGCTAG		ATGAAAGCCTGCTAG		MKAC*		MKAC*		ATCACTTGCC	CATCACCCTA	1	O	0	0	0	0	0
7998	3669	an	AN1476.1	55.m02978	AO070306000099	0	-29	-18					ATGCTGAATTGA	ATGCTGAATTGA			MLN*	MLN*			GCTCTTTGAA	CTGTCAATAC	1	R	0	0	0	0	0
8000	3669	ao	AN1476.1	55.m02978	AO070306000099	0					-25	-11	ATGTTACGAGCGTGA			ATGTTACGAGCGTGA	MLRA*			MLRA*	GTCTAGCTGG	TCAATTGAAA	1	R	0	0	0	0	0
8001	3673	conserved	AN0118.1	71.m15397	AO070311000095	0	-36	-10	-39	-13	-39	-13	ATGmTmmmsdysrGyydmTwCyyrTAr	ATGATACAGTCGGGTTACTTCTCATAG	ATGCTAACCGTGGGTCGCTACCTGTAA	ATGATCACCACCAGCTTATTCTCATAA	Miqsgyfs*	MIQSGYFS*	MLTVGRYL*	MITTSLFS*	yvrmmymTys	rkwrTyryvr	1	Z	0	0	0	0	0
8013	3674	ao	AN8145.1	71.m15392	AO070311000100	1					-103	-65	ATGATTTATAGACGTCTGGGCGAGTTCCGTCTTACATAG			ATGATTTATAGACGTCTGGGCGAGTTCCGTCTTACATAG	MIYRRLGEFRLT*			MIYRRLGEFRLT*	ATTTATAAGC	TATGCTCCAA	0	S	0	0	0	YML079W	0
8014	3674	ao	AN8145.1	71.m15392	AO070311000100	1					-63	-16	ATGCTCCAACTAAACCTTTCTCCTCAAGAAGAACAGACAAGACAGTAG			ATGCTCCAACTAAACCTTTCTCCTCAAGAAGAACAGACAAGACAGTAG	MLQLNLSPQEEQTRQ*			MLQLNLSPQEEQTRQ*	CTTACATAGT	TAAATAAAAG	0	S	0	0	0	YML079W	0
8022	3675	af	AN1007.1	70.m15225	AO070312000026	0			-39	-13			ATGAGCTGTGGTCAATACTGGCGTTGA		ATGAGCTGTGGTCAATACTGGCGTTGA		MSCGQYWR*		MSCGQYWR*		CATTCTGGTA	GACTTCGTCA	1	C	0	0	0	0	0
8029	3677	af	AN6853.1	71.m15279	AO070314000087	0			-45	-22			ATGAGATATAGAAATCTGGTTTGA		ATGAGATATAGAAATCTGGTTTGA		MRYRNLV*		MRYRNLV*		GCTTAGATTT	AAGCTTAAAC	1	I	FG05890.1	0	0	0	0
8036	3678	af	AN0043.1	71.m15318	AO070314000122	0			-55	-38			ATGCCAGCGATCCTCTGA		ATGCCAGCGATCCTCTGA		MPAIL*		MPAIL*		GGCTATGTGC	AGCAGAAACG	1	I	FG02725.1	MG05031.1	NCU09517.1	0	0
8041	3679	af	AN8672.1	62.m03398	AO070315000089	0			-33	-1			ATGCCCTTCTCACAAGGGCTTGAAGCCGCGTAA		ATGCCCTTCTCACAAGGGCTTGAAGCCGCGTAA		MPFSQGLEAA*		MPFSQGLEAA*		CCTCCGGTTT	ATGGCGTCAG	1	R	0	0	0	0	0
8043	3679	ao	AN8672.1	62.m03398	AO070315000089	0					-30	-1	ATGCCCTTTCGAGGGTTAGAAGTAGCCTAA			ATGCCCTTTCGAGGGTTAGAAGTAGCCTAA	MPFRGLEVA*			MPFRGLEVA*	CACACATTGC	ATGGCTTCCA	1	R	0	0	0	0	0
8048	3680	af	AN4581.1	57.m05499	AO070316000164	0			-47	-30			ATGTGTTGCGCAGCCTAA		ATGTGTTGCGCAGCCTAA		MCCAA*		MCCAA*		CAGCGGACAT	CAATAATAAT	1	T	0	0	0	0	0
8053	3685	an	AN4245.1	54.m06807	AO070324000167	1	-431	-366					ATGCTGAAGATCGCCGCTGCCTTCAGTGCGCATTTCTCCGCACAAGGCCAGGAGATCAGCAGATGA	ATGCTGAAGATCGCCGCTGCCTTCAGTGCGCATTTCTCCGCACAAGGCCAGGAGATCAGCAGATGA			MLKIAAAFSAHFSAQGQEISR*	MLKIAAAFSAHFSAQGQEISR*			GCGACAGCAC	CCCTCGCTTC	0	T	0	MG07051.1	0	0	0
8054	3685	an	AN4245.1	54.m06807	AO070324000167	1	-369	-352					ATGACCCTCGCTTCTTGA	ATGACCCTCGCTTCTTGA			MTLAS*	MTLAS*			AGATCAGCAG	GAAATCCTTC	0	T	0	MG07051.1	0	0	0
8055	3685	an	AN4245.1	54.m06807	AO070324000167	1	-283	-224					ATGCAATCTGAACCGGGGGATAAGCAGGTTCAGGCTTCGATGCTATCTTCAACAAACTGA	ATGCAATCTGAACCGGGGGATAAGCAGGTTCAGGCTTCGATGCTATCTTCAACAAACTGA			MQSEPGDKQVQASMLSSTN*	MQSEPGDKQVQASMLSSTN*			AGGAACGCGA	ACGCCAATCA	0	T	0	MG07051.1	0	0	0
8056	3685	an	AN4245.1	54.m06807	AO070324000167	1	-244	-224					ATGCTATCTTCAACAAACTGA	ATGCTATCTTCAACAAACTGA			MLSSTN*	MLSSTN*			TCAGGCTTCG	ACGCCAATCA	0	T	0	MG07051.1	0	0	0
8057	3685	af	AN4245.1	54.m06807	AO070324000167	1			-460	-440			ATGGTTTTCCATCAACCATAG		ATGGTTTTCCATCAACCATAG		MVFHQP*		MVFHQP*		CGGGCCCCAT	ACGACACAGT	0	T	0	MG07051.1	0	0	0
8058	3685	af	AN4245.1	54.m06807	AO070324000167	1			-388	-356			ATGCCGCCTTCTGCATATCTCACGGCATTTTGA		ATGCCGCCTTCTGCATATCTCACGGCATTTTGA		MPPSAYLTAF*		MPPSAYLTAF*		CCACCAATAA	GGAAGCGGGG	0	T	0	MG07051.1	0	0	0
8059	3685	af	AN4245.1	54.m06807	AO070324000167	1			-344	-315			ATGAACGATCACGTACCCAATAAAGTATAG		ATGAACGATCACGTACCCAATAAAGTATAG		MNDHVPNKV*		MNDHVPNKV*		GAAGCGGGGA	CGGCAGAGGA	0	T	0	MG07051.1	0	0	0
8060	3685	af	AN4245.1	54.m06807	AO070324000167	1			-305	-294			ATGGCAGCGTGA		ATGGCAGCGTGA		MAA*		MAA*		GCGGCAGAGG	CGACGGCCAC	0	T	0	MG07051.1	0	0	0
8061	3685	af	AN4245.1	54.m06807	AO070324000167	1			-278	-126			ATGCTACCCTCCTGCTGCATTCCTGTCGATCTGCTGGTCATGCGCTCCCTTGCTGTACGTACCTGTACGGGGTCATTCCTGTTCCTATGTGGCCTTTGCTTGAACCCTGTCAGCCAGGCCATTCGGAGAATAACAATGCGATCTGATCGATAA		ATGCTACCCTCCTGCTGCATTCCTGTCGATCTGCTGGTCATGCGCTCCCTTGCTGTACGTACCTGTACGGGGTCATTCCTGTTCCTATGTGGCCTTTGCTTGAACCCTGTCAGCCAGGCCATTCGGAGAATAACAATGCGATCTGATCGATAA		MLPSCCIPVDLLVMRSLAVRTCTGSFLFLCGLCLNPVSQAIRRITMRSDR*		MLPSCCIPVDLLVMRSLAVRTCTGSFLFLCGLCLNPVSQAIRRITMRSDR*		GCCACAAGCG	GAAGACTGCA	0	T	0	MG07051.1	0	0	0
8062	3685	af	AN4245.1	54.m06807	AO070324000167	1			-239	-126			ATGCGCTCCCTTGCTGTACGTACCTGTACGGGGTCATTCCTGTTCCTATGTGGCCTTTGCTTGAACCCTGTCAGCCAGGCCATTCGGAGAATAACAATGCGATCTGATCGATAA		ATGCGCTCCCTTGCTGTACGTACCTGTACGGGGTCATTCCTGTTCCTATGTGGCCTTTGCTTGAACCCTGTCAGCCAGGCCATTCGGAGAATAACAATGCGATCTGATCGATAA		MRSLAVRTCTGSFLFLCGLCLNPVSQAIRRITMRSDR*		MRSLAVRTCTGSFLFLCGLCLNPVSQAIRRITMRSDR*		TCTGCTGGTC	GAAGACTGCA	0	T	0	MG07051.1	0	0	0
8063	3685	af	AN4245.1	54.m06807	AO070324000167	1			-192	-133			ATGTGGCCTTTGCTTGAACCCTGTCAGCCAGGCCATTCGGAGAATAACAATGCGATCTGA		ATGTGGCCTTTGCTTGAACCCTGTCAGCCAGGCCATTCGGAGAATAACAATGCGATCTGA		MWPLLEPCQPGHSENNNAI*		MWPLLEPCQPGHSENNNAI*		TCCTGTTCCT	TCGATAAGAA	0	T	0	MG07051.1	0	0	0
8064	3685	af	AN4245.1	54.m06807	AO070324000167	1			-143	-126			ATGCGATCTGATCGATAA		ATGCGATCTGATCGATAA		MRSDR*		MRSDR*		GAGAATAACA	GAAGACTGCA	0	T	0	MG07051.1	0	0	0
8065	3685	af	AN4245.1	54.m06807	AO070324000167	1			-73	-59			ATGTCATCAACATAA		ATGTCATCAACATAA		MSST*		MSST*		ATACTTTCTG	CAGGTCACAA	0	T	0	MG07051.1	0	0	0
8066	3685	ao	AN4245.1	54.m06807	AO070324000167	1					-420	-340	ATGGAATGGTCTATCACAATGCTCATCATTGCTTTTGTCATGCGCTGTTACCTTGTGCCTTGTCAATTACTCCATCCTTAG			ATGGAATGGTCTATCACAATGCTCATCATTGCTTTTGTCATGCGCTGTTACCTTGTGCCTTGTCAATTACTCCATCCTTAG	MEWSITMLIIAFVMRCYLVPCQLLHP*			MEWSITMLIIAFVMRCYLVPCQLLHP*	TCCCCGCCCT	GGTTCAAGAG	0	T	0	MG07051.1	0	0	0
8067	3685	ao	AN4245.1	54.m06807	AO070324000167	1					-415	-293	ATGGTCTATCACAATGCTCATCATTGCTTTTGTCATGCGCTGTTACCTTGTGCCTTGTCAATTACTCCATCCTTAGGGTTCAAGAGAGCGGGGGATGAAGAGGACGTGCCCAATTCAGTTTAG			ATGGTCTATCACAATGCTCATCATTGCTTTTGTCATGCGCTGTTACCTTGTGCCTTGTCAATTACTCCATCCTTAGGGTTCAAGAGAGCGGGGGATGAAGAGGACGTGCCCAATTCAGTTTAG	MVYHNAHHCFCHALLPCALSITPSLGFKRAGDEEDVPNSV*			MVYHNAHHCFCHALLPCALSITPSLGFKRAGDEEDVPNSV*	GCCCTATGGA	GGCCGGCAAG	0	T	0	MG07051.1	0	0	0
8068	3685	ao	AN4245.1	54.m06807	AO070324000167	1					-402	-340	ATGCTCATCATTGCTTTTGTCATGCGCTGTTACCTTGTGCCTTGTCAATTACTCCATCCTTAG			ATGCTCATCATTGCTTTTGTCATGCGCTGTTACCTTGTGCCTTGTCAATTACTCCATCCTTAG	MLIIAFVMRCYLVPCQLLHP*			MLIIAFVMRCYLVPCQLLHP*	GTCTATCACA	GGTTCAAGAG	0	T	0	MG07051.1	0	0	0
8069	3685	ao	AN4245.1	54.m06807	AO070324000167	1					-381	-340	ATGCGCTGTTACCTTGTGCCTTGTCAATTACTCCATCCTTAG			ATGCGCTGTTACCTTGTGCCTTGTCAATTACTCCATCCTTAG	MRCYLVPCQLLHP*			MRCYLVPCQLLHP*	TGCTTTTGTC	GGTTCAAGAG	0	T	0	MG07051.1	0	0	0
8070	3685	ao	AN4245.1	54.m06807	AO070324000167	1					-321	-187	ATGAAGAGGACGTGCCCAATTCAGTTTAGGGCCGGCAAGTCATCATCCAAACTACGGACAGACGATGTCACCCTTCCTTCAACTCTACACCAATCGTACTATTTCATCCCCTTCCTTCCGGGGCATCGCAACTGA			ATGAAGAGGACGTGCCCAATTCAGTTTAGGGCCGGCAAGTCATCATCCAAACTACGGACAGACGATGTCACCCTTCCTTCAACTCTACACCAATCGTACTATTTCATCCCCTTCCTTCCGGGGCATCGCAACTGA	MKRTCPIQFRAGKSSSKLRTDDVTLPSTLHQSYYFIPFLPGHRN*			MKRTCPIQFRAGKSSSKLRTDDVTLPSTLHQSYYFIPFLPGHRN*	AGAGCGGGGG	AATTTGATTT	0	T	0	MG07051.1	0	0	0
8071	3685	ao	AN4245.1	54.m06807	AO070324000167	1					-257	-180	ATGTCACCCTTCCTTCAACTCTACACCAATCGTACTATTTCATCCCCTTCCTTCCGGGGCATCGCAACTGAAATTTGA			ATGTCACCCTTCCTTCAACTCTACACCAATCGTACTATTTCATCCCCTTCCTTCCGGGGCATCGCAACTGAAATTTGA	MSPFLQLYTNRTISSPSFRGIATEI*			MSPFLQLYTNRTISSPSFRGIATEI*	CGGACAGACG	TTTGTGATCG	0	T	0	MG07051.1	0	0	0
8072	3685	ao	AN4245.1	54.m06807	AO070324000167	1					-145	-110	ATGCGCATGCAGAGTGATCGATTCGCCTCGGCTTGA			ATGCGCATGCAGAGTGATCGATTCGCCTCGGCTTGA	MRMQSDRFASA*			MRMQSDRFASA*	ATACTCGGTC	AGCGATTCAC	0	T	0	MG07051.1	0	0	0
8073	3685	ao	AN4245.1	54.m06807	AO070324000167	1					-139	-110	ATGCAGAGTGATCGATTCGCCTCGGCTTGA			ATGCAGAGTGATCGATTCGCCTCGGCTTGA	MQSDRFASA*			MQSDRFASA*	GGTCATGCGC	AGCGATTCAC	0	T	0	MG07051.1	0	0	0
8086	3689	an	AN2772.1	59.m09271	AO070327000014	0	-56	-15					ATGGCGTCTACTGCCCGACGGCTTTCTCCCCGCAATACATGA	ATGGCGTCTACTGCCCGACGGCTTTCTCCCCGCAATACATGA			MASTARRLSPRNT*	MASTARRLSPRNT*			CGAACCGACG	ACGCCGCCTC	1	DO	FG06074.1	MG03314.1	0	0	0
8095	3691	ao	AN5568.1	58.m07492	AO070328000040	1					-654	-586	ATGCCATTTACTCCGCTGGTACGACTAAGGTTTTTTTTTCCTTTGGAATCTCCATTACGCCTTACTTAA			ATGCCATTTACTCCGCTGGTACGACTAAGGTTTTTTTTTCCTTTGGAATCTCCATTACGCCTTACTTAA	MPFTPLVRLRFFFPLESPLRLT*			MPFTPLVRLRFFFPLESPLRLT*	TACCTATTTA	TAAAATTTGA	0		0	0	0	0	0
8103	3695	af	AN9486.1	59.m09213	AO070329000083	0			-55	-20			ATGGTCACTCTGCCAATCCTCATATCGTCCACATAA		ATGGTCACTCTGCCAATCCTCATATCGTCCACATAA		MVTLPILISST*		MVTLPILISST*		GATATCATCG	CCACTCCAGG	1	H	0	0	0	YOR196C	0
8118	3699	ao	AN1516.1	55.m03035	AO070334000235	0					-39	-28	ATGCTATATTGA			ATGCTATATTGA	MLY*			MLY*	GCCCCTATTT	ATCCGGTTAC	1	EH	0	0	0	0	0
8119	3700	af	AN3056.1	59.m08955	AO070337000018	1			-66	-46			ATGCAATTTCTGGAAATATAA		ATGCAATTTCTGGAAATATAA		MQFLEI*		MQFLEI*		GTTTTTTTAT	GCTCAATCTG	0	R	0	0	0	YOL022C	0
8121	3700	ao	AN3056.1	59.m08955	AO070337000018	1					-133	-71	ATGAGGGGCCGATTGCTTTTATCTGTTGACCTTCTGTGCACACTTATTGTCGACTACTTATGA			ATGAGGGGCCGATTGCTTTTATCTGTTGACCTTCTGTGCACACTTATTGTCGACTACTTATGA	MRGRLLLSVDLLCTLIVDYL*			MRGRLLLSVDLLCTLIVDYL*	TGCTGGACTG	ATCAATATAG	0	R	0	0	0	YOL022C	0
8122	3700	ao	AN3056.1	59.m08955	AO070337000018	1					-74	-48	ATGAATCAATATAGTCAATTATTCTAG			ATGAATCAATATAGTCAATTATTCTAG	MNQYSQLF*			MNQYSQLF*	TCGACTACTT	ACCAGGTTTC	0	R	0	0	0	YOL022C	0
8130	3705	an	AN2738.1	54.m06679	AO070338000220	0	-27	-4					ATGATCGACGTTCGATTGCCATAA	ATGATCGACGTTCGATTGCCATAA			MIDVRLP*	MIDVRLP*			CCGCCCTCGT	GCCATGGCGG	1	U	0	MG01245.1	0	0	0
8134	3705	af	AN2738.1	54.m06679	AO070338000220	0			-22	-5			ATGATCGTCGCTCCTTGA		ATGATCGTCGCTCCTTGA		MIVAP*		MIVAP*		TTTCGACCTT	AGAGATGCCT	1	U	0	MG01245.1	0	0	0
8145	3709	an	AN2065.1	57.m05763	AO070341000211	0	-57	-43					ATGATAACACCTTAA	ATGATAACACCTTAA			MITP*	MITP*			CACCGAGGGC	AGCTTGGATC	1	L	0	0	0	0	0
8163	3716	an	AN1061.1	70.m15172	AO070218000005	0	-52	-38					ATGCTGTGGTTGTAA	ATGCTGTGGTTGTAA			MLWL*	MLWL*			TACTTGATTC	TTATACGAGA	1	E	0	MG01385.1	0	0	0
8169	3716	ao	AN1061.1	70.m15172	AO070218000005	0					-59	-12	ATGACTCTGGATTCCTTCTATACCTGCCCCGTGTCTCAGAGCTCTTAA			ATGACTCTGGATTCCTTCTATACCTGCCCCGTGTCTCAGAGCTCTTAA	MTLDSFYTCPVSQSS*			MTLDSFYTCPVSQSS*	CCCTTTCGTG	CTCCCACAAT	1	E	0	MG01385.1	0	0	0
8229	3733	an	AN3110.1	59.m08628	AO070303000041	1	-304	-269					ATGCATTCTCCGCCCCGTCTCCGACCGCGGCCATAG	ATGCATTCTCCGCCCCGTCTCCGACCGCGGCCATAG			MHSPPRLRPRP*	MHSPPRLRPRP*			GCCCTGGATC	TCAACTTGGC	0	T	0	0	0	0	0
8230	3735	an	AN5675.1	65.m07401	AO070309000090	1	-181	-86					ATGATAGAATACATGCTGAGACCCTTTCGGCCCTCGACCAAACTTGGTGGGATTCACGTTTGTCTGCAGCTCTTCGCTTTCAAGCTTGTGGTTTGA	ATGATAGAATACATGCTGAGACCCTTTCGGCCCTCGACCAAACTTGGTGGGATTCACGTTTGTCTGCAGCTCTTCGCTTTCAAGCTTGTGGTTTGA			MIEYMLRPFRPSTKLGGIHVCLQLFAFKLVV*	MIEYMLRPFRPSTKLGGIHVCLQLFAFKLVV*			CCTCTCTTAG	ATTCGTATAA	0	O	FG05735.1	0	0	YDR330W	0
8231	3735	an	AN5675.1	65.m07401	AO070309000090	1	-169	-86					ATGCTGAGACCCTTTCGGCCCTCGACCAAACTTGGTGGGATTCACGTTTGTCTGCAGCTCTTCGCTTTCAAGCTTGTGGTTTGA	ATGCTGAGACCCTTTCGGCCCTCGACCAAACTTGGTGGGATTCACGTTTGTCTGCAGCTCTTCGCTTTCAAGCTTGTGGTTTGA			MLRPFRPSTKLGGIHVCLQLFAFKLVV*	MLRPFRPSTKLGGIHVCLQLFAFKLVV*			GATAGAATAC	ATTCGTATAA	0	O	FG05735.1	0	0	YDR330W	0
8232	3735	ao	AN5675.1	65.m07401	AO070309000090	1					-247	-203	ATGCTGGGTTCATTCCTCTTACCACATAACTGCGATCATTGTTAA			ATGCTGGGTTCATTCCTCTTACCACATAACTGCGATCATTGTTAA	MLGSFLLPHNCDHC*			MLGSFLLPHNCDHC*	AAAAGCTCGT	TTATTAAGAC	0	O	FG05735.1	0	0	YDR330W	0
8235	3736	af	AN5687.1	65.m07413	AO070309000102	1			-68	-30			ATGATCAACCACGACGCATACACGGCCATTTCGATTTGA		ATGATCAACCACGACGCATACACGGCCATTTCGATTTGA		MINHDAYTAISI*		MINHDAYTAISI*		CTAGCGACTG	ATGAGTATCA	0		0	0	0	0	0
8244	3738	af	AN9413.1	53.m03669	AO070310000006	0			-49	-2			ATGATAGTCTCTCCTGTCGCCACCGGTTCTTCGAGAAGCTGTCCGTAA		ATGATAGTCTCTCCTGTCGCCACCGGTTCTTCGAGAAGCTGTCCGTAA		MIVSPVATGSSRSCP*		MIVSPVATGSSRSCP*		TTAAATTTAC	CATGGAGTCA	1		0	0	0	0	0
8249	3741	af	AN0112.1	71.m15387	AO070311000096	0			-59	-39			ATGAGATTGCTCTGTCATTGA		ATGAGATTGCTCTGTCATTGA		MRLLCH*		MRLLCH*		AGGCTATGGT	GCAACCTCCC	1	U	0	0	0	0	0
8254	3742	af	AN1005.1	70.m15223	AO070312000029	0			-39	-7			ATGCTGATAAGGAGTCGAGAATTATATGCATGA		ATGCTGATAAGGAGTCGAGAATTATATGCATGA		MLIRSRELYA*		MLIRSRELYA*		GAAGCTCAGG	AATAGCATGA	1	Z	FG09793.1	0	NCU05282.1	0	0
8278	3752	af	AN5535.1	58.m07481	AO070328000056	0			-26	-12			ATGGACTCGTCTTGA		ATGGACTCGTCTTGA		MDSS*		MDSS*		CGAAAGCTCT	CAGAACTCAA	1	S	0	MG00102.1	NCU04505.1	0	0
8316	3762	an	AN2927.1	59.m09068	AO070337000182	0	-39	-7					ATGCAGCCCAATGCGTCTGGTGGCTGCTCATGA	ATGCAGCCCAATGCGTCTGGTGGCTGCTCATGA			MQPNASGGCS*	MQPNASGGCS*			ATTGCGACGG	ACGACAATGG	1	D	0	0	0	0	0
8325	3762	ao	AN2927.1	59.m09068	AO070337000182	0					-26		ATGTGGCCTCGCTTTGAATCGCTATGA			ATGTGGCCTCGCTTTGAATCGCTATGA	MWPRFESL*			MWPRFESL*	GGACGCGTCC	TGGCTTCTAC	1	D	0	0	0	0	0
8331	3763	af	AN3797.1	57.m05686	AO070337000231	0			-49	-35			ATGAAGTGCATGTAA		ATGAAGTGCATGTAA		MKCM*		MKCM*		CCTGTCGGGG	CACTAAACAA	1	L	FG08405.1	MG00630.1	NCU04733.1	0	0
8333	3765	conserved	AN0244.1	54.m06697	AO070338000236	0	-23		-23		-23		ATGrwyATkCGrACrThyyGCTGA	ATGAACATTCGGACATACCGCTGA	ATGGTTATGCGAACGTCCTGCTGA	ATGGTCATTCGAACATTTTGCTGA	MniRTyr*	MNIRTYR*	MVMRTSC*	MVIRTFC*	wbwbrrAGmr	TGAGCTCCAh	1	U	0	0	0	0	0
8336	3765	af	AN0244.1	54.m06697	AO070338000236	0			-17				ATGCGAACGTCCTGCTGA		ATGCGAACGTCCTGCTGA		MRTSC*		MRTSC*		AGAGATGGTT	TGAGCTCCAA	1	U	0	0	0	0	0
8365	3782	an	AN8836.1	71.m15967	AO070271000042	0	-59	-36					ATGGGAAGACATTTAGACTTTTAG	ATGGGAAGACATTTAGACTTTTAG			MGRHLDF*	MGRHLDF*			ATTTCGTCGT	TGTACTATGG	1	T	0	0	0	0	0
8366	3782	an	AN8836.1	71.m15967	AO070271000042	0	-29	-18					ATGGCTAACTGA	ATGGCTAACTGA			MAN*	MAN*			TTAGTGTACT	CTCCCTTGTC	1	T	0	0	0	0	0
8393	3790	ao	AN8879.1	56.m02290	AO070293000008	0					-32	-9	ATGCCGACGAAGCCTTGCCGTTAG			ATGCCGACGAAGCCTTGCCGTTAG	MPTKPCR*			MPTKPCR*	TAATAGCCCG	CTAGAACGAT	1	U	0	0	NCU09313.1	0	0
8404	3794	af	AN8389.1	59.m08445	AO070300000072	0			-52	-35			ATGGAGTGTCTATCATGA		ATGGAGTGTCTATCATGA		MECLS*		MECLS*		TAATGCGGTT	TCATACCATC	1		0	0	0	0	0
8409	3798	an	AN1708.1	58.m07794	AO070305000041	0	-50	-39					ATGATTCAATAA	ATGATTCAATAA			MIQ*	MIQ*			AGTTCATGAC	TAGGCTCAGC	1	L	0	0	0	0	0
8414	3798	ao	AN1708.1	58.m07794	AO070305000041	0					-49	-38	ATGTTCTATTAG			ATGTTCTATTAG	MFY*			MFY*	TATCTACGGC	AGTTTTAAAT	1	L	0	0	0	0	0
8415	3799	ao	AN8269.1	53.m03692	AO070310000033	0					-51	-16	ATGACTAACACAACATTGACGTGGAATAGAATATAA			ATGACTAACACAACATTGACGTGGAATAGAATATAA	MTNTTLTWNRI*			MTNTTLTWNRI*	CAGTAGACCT	CTCACATCCC	1	O	0	0	0	0	0
8439	3809	an	AN5234.1	54.m06837	AO070324000133	1	-179	-108					ATGTTGCCCGCCGTATGTGCCAGTAGTATATCGGATCTGCTCCTACCTCATACACGGTTCAATTCTCCATGA	ATGTTGCCCGCCGTATGTGCCAGTAGTATATCGGATCTGCTCCTACCTCATACACGGTTCAATTCTCCATGA			MLPAVCASSISDLLLPHTRFNSP*	MLPAVCASSISDLLLPHTRFNSP*			CCTTCGTCGT	GCCCCACATC	0	C	0	0	0	0	0
8440	3809	an	AN5234.1	54.m06837	AO070324000133	1	-165	-154					ATGTGCCAGTAG	ATGTGCCAGTAG			MCQ*	MCQ*			TGCCCGCCGT	TATATCGGAT	0	C	0	0	0	0	0
8441	3809	an	AN5234.1	54.m06837	AO070324000133	1	-111	-37					ATGAGCCCCACATCCCCACATTACTGGCAGTATTACTGTAGTTTACTTAAGGTGAGGTCATCTCGGCCACCATAG	ATGAGCCCCACATCCCCACATTACTGGCAGTATTACTGTAGTTTACTTAAGGTGAGGTCATCTCGGCCACCATAG			MSPTSPHYWQYYCSLLKVRSSRPP*	MSPTSPHYWQYYCSLLKVRSSRPP*			TCAATTCTCC	GCTCGAAACG	0	C	0	0	0	0	0
8442	3809	af	AN5234.1	54.m06837	AO070324000133	1			-251	-123			ATGTACGTTTTGTCTGTTATAAGATATCCAATCGAACAGTTTGAATTCAATCTTGGGCCATGCATGATGCAATTCTCACAGGCGTCATTATTTTGCTTGAGGCCAGAAGTCAAGGAGGAATCTCCCTAG		ATGTACGTTTTGTCTGTTATAAGATATCCAATCGAACAGTTTGAATTCAATCTTGGGCCATGCATGATGCAATTCTCACAGGCGTCATTATTTTGCTTGAGGCCAGAAGTCAAGGAGGAATCTCCCTAG		MYVLSVIRYPIEQFEFNLGPCMMQFSQASLFCLRPEVKEESP*		MYVLSVIRYPIEQFEFNLGPCMMQFSQASLFCLRPEVKEESP*		GTTCGCGTGT	CCCCGCACCT	0	C	0	0	0	0	0
8443	3809	af	AN5234.1	54.m06837	AO070324000133	1			-192	-88			ATGCATGATGCAATTCTCACAGGCGTCATTATTTTGCTTGAGGCCAGAAGTCAAGGAGGAATCTCCCTAGCCCCGCACCTTATCCACCGGCCTACAACTGTATGA		ATGCATGATGCAATTCTCACAGGCGTCATTATTTTGCTTGAGGCCAGAAGTCAAGGAGGAATCTCCCTAGCCCCGCACCTTATCCACCGGCCTACAACTGTATGA		MHDAILTGVIILLEARSQGGISLAPHLIHRPTTV*		MHDAILTGVIILLEARSQGGISLAPHLIHRPTTV*		ATCTTGGGCC	CCTTTCTGTT	0	C	0	0	0	0	0
8444	3809	af	AN5234.1	54.m06837	AO070324000133	1			-188	-123			ATGATGCAATTCTCACAGGCGTCATTATTTTGCTTGAGGCCAGAAGTCAAGGAGGAATCTCCCTAG		ATGATGCAATTCTCACAGGCGTCATTATTTTGCTTGAGGCCAGAAGTCAAGGAGGAATCTCCCTAG		MMQFSQASLFCLRPEVKEESP*		MMQFSQASLFCLRPEVKEESP*		TGGGCCATGC	CCCCGCACCT	0	C	0	0	0	0	0
8445	3809	af	AN5234.1	54.m06837	AO070324000133	1			-185	-123			ATGCAATTCTCACAGGCGTCATTATTTTGCTTGAGGCCAGAAGTCAAGGAGGAATCTCCCTAG		ATGCAATTCTCACAGGCGTCATTATTTTGCTTGAGGCCAGAAGTCAAGGAGGAATCTCCCTAG		MQFSQASLFCLRPEVKEESP*		MQFSQASLFCLRPEVKEESP*		GCCATGCATG	CCCCGCACCT	0	C	0	0	0	0	0
8446	3809	af	AN5234.1	54.m06837	AO070324000133	1			-91	-56			ATGACCTTTCTGTTCCCTCACCGATTATACAAGTAG		ATGACCTTTCTGTTCCCTCACCGATTATACAAGTAG		MTFLFPHRLYK*		MTFLFPHRLYK*		CTACAACTGT	TACGTCAACT	0	C	0	0	0	0	0
8447	3809	ao	AN5234.1	54.m06837	AO070324000133	1					-299	-252	ATGTCAATGTCAAATTTTCTTAAGACAGCTGTTTCCTCGTACTATTGA			ATGTCAATGTCAAATTTTCTTAAGACAGCTGTTTCCTCGTACTATTGA	MSMSNFLKTAVSSYY*			MSMSNFLKTAVSSYY*	TTATTTTATT	TCTACTGCGA	0	C	0	0	0	0	0
8448	3809	ao	AN5234.1	54.m06837	AO070324000133	1					-293	-252	ATGTCAAATTTTCTTAAGACAGCTGTTTCCTCGTACTATTGA			ATGTCAAATTTTCTTAAGACAGCTGTTTCCTCGTACTATTGA	MSNFLKTAVSSYY*			MSNFLKTAVSSYY*	TATTATGTCA	TCTACTGCGA	0	C	0	0	0	0	0
8469	3821	ao	AN3063.1	59.m08951	AO070337000010	0					-57	-43	ATGGAGCGAAACTGA			ATGGAGCGAAACTGA	MERN*			MERN*	TTTTCTTTTG	CTTCTTGCGC	1	K	0	0	NCU02401.1	0	0
8517	3838	ao	AN8743.1	62.m03337	AO070250000032	0					-45	-19	ATGCAATACGAAAGAAAGTTCAAGTGA			ATGCAATACGAAAGAAAGTTCAAGTGA	MQYERKFK*			MQYERKFK*	CACTCTTTTA	ACAGTTTAAT	1	IOT	0	0	0	0	0
8537	3841	af	AN3430.1	59.m09287	AO070265000004	0			-27	-13			ATGTCTGTGGTCTGA		ATGTCTGTGGTCTGA		MSVV*		MSVV*		TCTTGCCGAT	GGTGCTTTAA	1		0	0	0	0	0
8585	3855	an	AN3920.1	69.m15008	AO070324000116	0	-48	-28					ATGTTCTTCATTTCTCAATGA	ATGTTCTTCATTTCTCAATGA			MFFISQ*	MFFISQ*			CCCCTACCAG	CTTTCGCTAC	1	H	0	0	0	0	0
8586	3855	an	AN3920.1	69.m15008	AO070324000116	0	-31	-2					ATGACTTTCGCTACTACTCATTTTCGCTGA	ATGACTTTCGCTACTACTCATTTTCGCTGA			MTFATTHFR*	MTFATTHFR*			TCATTTCTCA	AATGCGTGGA	1	H	0	0	0	0	0
8587	3855	ao	AN3920.1	69.m15008	AO070324000116	0					-50	-9	ATGCTCTTCTTTTGTCCTCACTCGCAGTTTCATCCTCTCTAA			ATGCTCTTCTTTTGTCCTCACTCGCAGTTTCATCCTCTCTAA	MLFFCPHSQFHPL*			MLFFCPHSQFHPL*	TTTTCCAACC	TTGCGGAGAT	1	H	0	0	0	0	0
8640	3865	an	AN1132.1	70.m15104	AO070331000124	0	-54	-43					ATGTCAGCCTAA	ATGTCAGCCTAA			MSA*	MSA*			AATATATAAC	CATGATTTCC	1	E	0	0	0	0	0
8641	3865	an	AN1132.1	70.m15104	AO070331000124	0	-41	-15					ATGATTTCCACCTTTGCTGTGGTATAA	ATGATTTCCACCTTTGCTGTGGTATAA			MISTFAVV*	MISTFAVV*			TCAGCCTAAC	TCCGTCGTCT	1	E	0	0	0	0	0
8646	3865	ao	AN1132.1	70.m15104	AO070331000124	0					-49	-5	ATGCTCCTCCTCGCCGAAGACATAGACGCTACTTCTTCGGTGTGA			ATGCTCCTCCTCGCCGAAGACATAGACGCTACTTCTTCGGTGTGA	MLLLAEDIDATSSV*			MLLLAEDIDATSSV*	TAATCCAGGA	CAATATGTCT	1	E	0	0	0	0	0
8652	3867	an	AN0311.1	54.m06980	AO070334000022	0	-57	-46					ATGTGCTATTAG	ATGTGCTATTAG			MCY*	MCY*			CCAGCTCTCG	TTCTCGACTT	1		0	0	0	0	0
8656	3871	an	AN1038.1	70.m15196	AO070336000073	0	-48	-13					ATGCTCCTCGCGCGCAGACAGCTTCCCCCTGAATAG	ATGCTCCTCGCGCGCAGACAGCTTCCCCCTGAATAG			MLLARRQLPPE*	MLLARRQLPPE*			GCCGACCGGA	TGCGCGGGAA	1	R	0	0	0	0	0
8662	3871	af	AN1038.1	70.m15196	AO070336000073	0			-48	-13			ATGTCACTAAGGTTGCTTGTGTTACATCCCGAATAG		ATGTCACTAAGGTTGCTTGTGTTACATCCCGAATAG		MSLRLLVLHPE*		MSLRLLVLHPE*		CTAAAGCGGA	CGCTCGGGAA	1	R	0	0	0	0	0
8664	3871	ao	AN1038.1	70.m15196	AO070336000073	0					-52	-35	ATGCTTCTTGGAAGCTAG			ATGCTTCTTGGAAGCTAG	MLLGS*			MLLGS*	CTCCAACGGC	TCTTCTGTCA	1	R	0	0	0	0	0
8674	3880	an	AN0407.1	54.m06667	AO070338000247	0	-33	-13					ATGATGGTCGCCAAAGTATGA	ATGATGGTCGCCAAAGTATGA			MMVAKV*	MMVAKV*			CAATCGTCCA	TAACAAGCCA	1	K	FG05376.1	0	NCU00310.1	YGR047C	0
8675	3880	an	AN0407.1	54.m06667	AO070338000247	0	-30	-13					ATGGTCGCCAAAGTATGA	ATGGTCGCCAAAGTATGA			MVAKV*	MVAKV*			TCGTCCAATG	TAACAAGCCA	1	K	FG05376.1	0	NCU00310.1	YGR047C	0
8715	3892	ao	AN1421.1	55.m02935	AO070232000017	0					-24	-4	ATGGTCCATCATCAGTCATAA			ATGGTCCATCATCAGTCATAA	MVHHQS*			MVHHQS*	CCATCGCTAT	CAAATGACGA	1	K	0	0	0	0	0
8717	3893	an	AN5198.1	69.m14897	AO070237000028	0	-34	-2					ATGGAGGTGCTAGGTGATCCGACTCGCTTGTAG	ATGGAGGTGCTAGGTGATCCGACTCGCTTGTAG			MEVLGDPTRL*	MEVLGDPTRL*			TTTTCAGTTG	CATGTCGTCA	1	R	0	0	0	0	0
8730	3896	af	AN2464.1	69.m15203	AO070264000006	1			-259	-233			ATGAAAATGGGAAAAAACCCTTTTTGA		ATGAAAATGGGAAAAAACCCTTTTTGA		MKMGKNPF*		MKMGKNPF*		GCGGAGAAAA	CATCAATGTA	0	U	0	MG05189.1	0	0	0
8731	3896	af	AN2464.1	69.m15203	AO070264000006	1			-253	-233			ATGGGAAAAAACCCTTTTTGA		ATGGGAAAAAACCCTTTTTGA		MGKNPF*		MGKNPF*		AAAAATGAAA	CATCAATGTA	0	U	0	MG05189.1	0	0	0
8737	3902	an	AN4951.1	59.m08856	AO070288000003	1	-179	-69					ATGGAATCTGAAAGCAGTCAAATCTCTTCCGTTCCAGTGTTTTCCCTCCGATATTATCATAGTTTCATCTCTCCCCTCCCTTTTGAGCCATTCCAGCTGCTTACCGCCTAA	ATGGAATCTGAAAGCAGTCAAATCTCTTCCGTTCCAGTGTTTTCCCTCCGATATTATCATAGTTTCATCTCTCCCCTCCCTTTTGAGCCATTCCAGCTGCTTACCGCCTAA			MESESSQISSVPVFSLRYYHSFISPLPFEPFQLLTA*	MESESSQISSVPVFSLRYYHSFISPLPFEPFQLLTA*			TCTCTGTTCT	ACCCAAGCCG	0	U	0	0	NCU06284.1	0	0
8740	3902	ao	AN4951.1	59.m08856	AO070288000003	1					-162	-127	ATGGACCAGGAGTTCCCTGATCCTTTTCCCTTTTAG			ATGGACCAGGAGTTCCCTGATCCTTTTCCCTTTTAG	MDQEFPDPFPF*			MDQEFPDPFPF*	CCTCCTGTCT	CGCTATTACC	0	U	0	0	NCU06284.1	0	0
8754	3905	an	AN3752.1	65.m07375	AO070309000065	1	-193	-164					ATGGCCCTGTGCCTCCTTGTGGAATATTAG	ATGGCCCTGTGCCTCCTTGTGGAATATTAG			MALCLLVEY*	MALCLLVEY*			TGGTAAATTA	TACAGCGTGG	0	TR	0	0	0	0	0
8755	3905	ao	AN3752.1	65.m07375	AO070309000065	1					-371	-342	ATGTTTGACGACCATCTACATATGTCCTAG			ATGTTTGACGACCATCTACATATGTCCTAG	MFDDHLHMS*			MFDDHLHMS*	CTCCTATTCG	TCTGTCTCCT	0	TR	0	0	0	0	0
8756	3905	ao	AN3752.1	65.m07375	AO070309000065	1					-254	-216	ATGATTCTTAGTGTCACGTTCAATAGTCGATTATCTTAA			ATGATTCTTAGTGTCACGTTCAATAGTCGATTATCTTAA	MILSVTFNSRLS*			MILSVTFNSRLS*	CGGGTTCTGG	TATCGCCTGG	0	TR	0	0	0	0	0
8766	3911	an	AN0135.1	71.m15419	AO070321000117	1	-215	-165					ATGACTGCTGTCTTCCGTTATTTATCCACTGTCTCGGAGTGCGTGGGTTAA	ATGACTGCTGTCTTCCGTTATTTATCCACTGTCTCGGAGTGCGTGGGTTAA			MTAVFRYLSTVSECVG*	MTAVFRYLSTVSECVG*			CTTTCTCTCC	TCTATCTTCT	0	ODR	FG10861.1	MG03876.1	0	0	0
8781	3920	af	AN2967.1	59.m09040	AO070337000149	0			-29	-18			ATGCTATGCTAA		ATGCTATGCTAA		MLC*		MLC*		AAAGTCAATA	GATTTCTCCG	1	J	FG06863.1	MG01648.1	NCU00950.1	YNR015W	0
8802	3924	af	AN1560.1	55.m03076	AO070339000293	0			-58	-17			ATGCGACAATTGATGCCCACACACTGTAAGGAAACCGATTGA		ATGCGACAATTGATGCCCACACACTGTAAGGAAACCGATTGA		MRQLMPTHCKETD*		MRQLMPTHCKETD*		TTGATCTCCA	AGGACTGGAA	1	D	0	0	0	0	0
8803	3924	af	AN1560.1	55.m03076	AO070339000293	0			-46	-17			ATGCCCACACACTGTAAGGAAACCGATTGA		ATGCCCACACACTGTAAGGAAACCGATTGA		MPTHCKETD*		MPTHCKETD*		GCGACAATTG	AGGACTGGAA	1	D	0	0	0	0	0
8826	3936	an	AN2508.1	59.m08476	AO070263000056	1	-28	-14					ATGTGGAGGCTATAA	ATGTGGAGGCTATAA			MWRL*	MWRL*			TGACTCTTTT	ACTGCTTTCC	1	E	FG10049.1	0	0	0	0
8831	3936	af	AN2508.1	59.m08476	AO070263000056	1			-27	-4			ATGGTACGGTTGAGCAACATCTAA		ATGGTACGGTTGAGCAACATCTAA		MVRLSNI*		MVRLSNI*		CAAGCCATTC	ATTATGTCTA	1	E	FG10049.1	0	0	0	0
8849	3943	af	AN4728.1	71.m15638	AO070284000080	0			-22	-5			ATGACCGTTTGGAGCTGA		ATGACCGTTTGGAGCTGA		MTVWS*		MTVWS*		TGAACCTCCA	GGTTATGAAA	1	S	FG00261.1	MG02867.1	0	0	0
8850	3943	ao	AN4728.1	71.m15638	AO070284000080	0					-29	-6	ATGACCAGTTTTCTGTCGAGGTAA			ATGACCAGTTTTCTGTCGAGGTAA	MTSFLSR*			MTSFLSR*	TCGCGACCCC	TAACCATGCG	1	S	FG00261.1	MG02867.1	0	0	0
8885	3960	af	AN6630.1	62.m03226	AO070326000082	1			-283	-200			ATGGCATTCACACAGCTTTGCGACCTTCCACTTACAACAAGACAAAAAAACCCCCAATCATCCCCAACAGCCCTCTATCCGTGA		ATGGCATTCACACAGCTTTGCGACCTTCCACTTACAACAAGACAAAAAAACCCCCAATCATCCCCAACAGCCCTCTATCCGTGA		MAFTQLCDLPLTTRQKNPQSSPTALYP*		MAFTQLCDLPLTTRQKNPQSSPTALYP*		TTTCGGCAGC	ACTAGGTATG	0	K	0	0	0	YHR193C	0
8887	3960	ao	AN6630.1	62.m03226	AO070326000082	1					-282	-211	ATGACATTCACACAGCTTTGCGCCTTTCCAACTTCAACCAGACCAAAAAAACCCCCTCATCCACCACAGTAA			ATGACATTCACACAGCTTTGCGCCTTTCCAACTTCAACCAGACCAAAAAAACCCCCTCATCCACCACAGTAA	MTFTQLCAFPTSTRPKKPPHPPQ*			MTFTQLCAFPTSTRPKKPPHPPQ*	TTCGGCAGCC	TCTTTTCTGT	0	K	0	0	0	YHR193C	0
8916	3977	conserved	AN5885.1	72.m19245	AO070245000022	0	-36	-22	-60	-46	-56	-42	ATGyyGsyykywTrA	ATGTCGGTTGTTTGA	ATGCTGCTCTCATAA	ATGCCGGCTGTTTGA	Msvv*	MSVV*	MLLS*	MPAV*	CbTkrrvCAC	drmvrTvsbd	1	G	0	0	0	0	0
8918	3978	an	AN3168.1	59.m08557	AO070256000022	0	-41	-18					ATGTCGATGCGGAGAGCCGTCTGA	ATGTCGATGCGGAGAGCCGTCTGA			MSMRRAV*	MSMRRAV*			GGAGCTCTCC	TCTGCTAGAG	1	C	FG10907.1	MG07007.1	0	0	0
8919	3978	an	AN3168.1	59.m08557	AO070256000022	0	-35	-18					ATGCGGAGAGCCGTCTGA	ATGCGGAGAGCCGTCTGA			MRRAV*	MRRAV*			CTCCATGTCG	TCTGCTAGAG	1	C	FG10907.1	MG07007.1	0	0	0
8960	3995	af	AN1461.1	55.m03257	AO070306000077	1			-216	-169			ATGACATACCTCTGCATTCTGAGATCTGAATTCTATATGCTGCTGTAA		ATGACATACCTCTGCATTCTGAGATCTGAATTCTATATGCTGCTGTAA		MTYLCILRSEFYMLL*		MTYLCILRSEFYMLL*		ACAACTTCTA	TCATGAGAAC	0	R	0	0	0	0	0
8961	3995	af	AN1461.1	55.m03257	AO070306000077	1			-180	-169			ATGCTGCTGTAA		ATGCTGCTGTAA		MLL*		MLL*		TGAATTCTAT	TCATGAGAAC	0	R	0	0	0	0	0
8962	3995	af	AN1461.1	55.m03257	AO070306000077	1			-166	-134			ATGAGAACGAACTGCTGCCCTTCACTTCATTGA		ATGAGAACGAACTGCTGCCCTTCACTTCATTGA		MRTNCCPSLH*		MRTNCCPSLH*		TGCTGTAATC	CCCGGGCACC	0	R	0	0	0	0	0
8964	3995	ao	AN1461.1	55.m03257	AO070306000077	1					-188	-174	ATGATGACCAATTGA			ATGATGACCAATTGA	MMTN*			MMTN*	ATATAGTACC	ACTATCTTTT	0	R	0	0	0	0	0
8965	3995	ao	AN1461.1	55.m03257	AO070306000077	1					-185	-174	ATGACCAATTGA			ATGACCAATTGA	MTN*			MTN*	TAGTACCATG	ACTATCTTTT	0	R	0	0	0	0	0
8974	3997	ao	AN3749.1	65.m07385	AO070309000073	0					-33	-4	ATGTGGCTTATAAAAACACCCGGGCAGTAA			ATGTGGCTTATAAAAACACCCGGGCAGTAA	MWLIKTPGQ*			MWLIKTPGQ*	GTTGAAGTCT	ACGATGCCTT	1	L	FG07112.1	MG09306.1	0	0	0
8979	4003	an	AN0910.1	70.m15519	AO070320000091	0	-42	-25					ATGTCCCGTTCGGGATGA	ATGTCCCGTTCGGGATGA			MSRSG*	MSRSG*			TACCTGTTTC	CTTTCATGGT	1	I	0	0	0	0	0
8980	4003	an	AN0910.1	70.m15519	AO070320000091	0	-28	-11					ATGACTTTCATGGTGTGA	ATGACTTTCATGGTGTGA			MTFMV*	MTFMV*			CCCGTTCGGG	CGCTCGCATT	1	I	0	0	0	0	0
8982	4003	af	AN0910.1	70.m15519	AO070320000091	0			-28	-11			ATGATGTCTCTGGAGTAG		ATGATGTCTCTGGAGTAG		MMSLE*		MMSLE*		CCCGTAAGGG	ATCAGTGATT	1	I	0	0	0	0	0
8983	4003	af	AN0910.1	70.m15519	AO070320000091	0			-25	-11			ATGTCTCTGGAGTAG		ATGTCTCTGGAGTAG		MSLE*		MSLE*		GTAAGGGATG	ATCAGTGATT	1	I	0	0	0	0	0
8998	4007	an	AN7672.1	57.m05448	AO070325000052	1	-118	-83					ATGAGTCACTTGACCCACCGCCGATTCGTTAATTGA	ATGAGTCACTTGACCCACCGCCGATTCGTTAATTGA			MSHLTHRRFVN*	MSHLTHRRFVN*			CTTTGGAGTG	CCACATACGA	0		0	0	NCU02635.1	0	0
8999	4007	af	AN7672.1	57.m05448	AO070325000052	1			-208	-164			ATGTCGGGGCGCAGGTCGGAGAGAATTGACTTCATTACTGGCTAA		ATGTCGGGGCGCAGGTCGGAGAGAATTGACTTCATTACTGGCTAA		MSGRRSERIDFITG*		MSGRRSERIDFITG*		CGATCCCGCT	GTATTTTCTC	0		0	0	NCU02635.1	0	0
9000	4007	ao	AN7672.1	57.m05448	AO070325000052	1					-173	-132	ATGTCAGGGGCCAGGCACAGCACTGCTTTTATCGCTGGCTAA			ATGTCAGGGGCCAGGCACAGCACTGCTTTTATCGCTGGCTAA	MSGARHSTAFIAG*			MSGARHSTAFIAG*	CGAATTCGCT	CGAGGATTCG	0		0	0	NCU02635.1	0	0
9002	4008	an	AN7723.1	71.m15750	AO070325000138	0	-50	-6					ATGGTACCTTGCTACTGTCCTCTCCACAGATTCCTGCAGCATTAG	ATGGTACCTTGCTACTGTCCTCTCCACAGATTCCTGCAGCATTAG			MVPCYCPLHRFLQH*	MVPCYCPLHRFLQH*			CATTGCAGCA	CTAAAATGAA	1	L	FG06122.1	0	NCU01370.1	0	0
9004	4008	ao	AN7723.1	71.m15750	AO070325000138	0					-52	-2	ATGGTATTTAGTTTCCTGCTATCAATTGCGTTTGTTCTTCGAACATACTGA			ATGGTATTTAGTTTCCTGCTATCAATTGCGTTTGTTCTTCGAACATACTGA	MVFSFLLSIAFVLRTY*			MVFSFLLSIAFVLRTY*	TCGCGTCCTG	CATGAAGCGC	1	L	FG06122.1	0	NCU01370.1	0	0
9022	4010	af	AN9038.1	59.m08392	AO070330000171	1			-89	-48			ATGATCTTACAAACACGACATGACCCTATCATAAGATATTGA		ATGATCTTACAAACACGACATGACCCTATCATAAGATATTGA		MILQTRHDPIIRY*		MILQTRHDPIIRY*		AATCTCCCCC	CATTATAGTA	0	H	FG05299.1	0	0	0	0
9023	4010	af	AN9038.1	59.m08392	AO070330000171	1			-70	-56			ATGACCCTATCATAA		ATGACCCTATCATAA		MTLS*		MTLS*		CAAACACGAC	GATATTGACA	0	H	FG05299.1	0	0	0	0
9032	4011	af	AN2879.1	53.m04051	AO070330000208	0			-31	-17			ATGCCATTATCATGA		ATGCCATTATCATGA		MPLS*		MPLS*		CAGTCGAGCC	TATCTACCGA	1	JIT	0	0	0	0	0
9035	4015	af	AN2992.1	59.m09022	AO070337000126	1			-441	-316			ATGTCTCTACCAATATATCAACCTCTCGTCAGGCTACCTATAGGCAAGTCTTTACTGCTAGATAACATTCTTCCTGACTGTTATCATATTTGGAAGTGCCTACTGCTGCAGAAAGGACATATATAA		ATGTCTCTACCAATATATCAACCTCTCGTCAGGCTACCTATAGGCAAGTCTTTACTGCTAGATAACATTCTTCCTGACTGTTATCATATTTGGAAGTGCCTACTGCTGCAGAAAGGACATATATAA		MSLPIYQPLVRLPIGKSLLLDNILPDCYHIWKCLLLQKGHI*		MSLPIYQPLVRLPIGKSLLLDNILPDCYHIWKCLLLQKGHI*		ACCCAAAGAT	TATGGCGGAT	0	J	0	0	0	0	0
9060	4027	conserved	AN4984.1	59.m08886	AO070288000052	1	-236	-222	-265	-251	-629	-615	ATGyywwTywwCTAA	ATGCTTTTCAACTAA	ATGTCAATCATCTAA	ATGTTATTTTACTAA	Mlfn*	MLFN*	MSII*	MLFY*	kwdTCyCyyC	GmGAhwyymA	0	R	0	0	0	0	0
9102	4038	conserved	AN6843.1	71.m15300	AO070314000096	1	-278	-237	-157	-116	-166	-125	ATGGCTbTCbCGmAGCwCwrGkGGbyTkyTbwCdGGvdCTGA	ATGGCTGTCTCGCAGCTCAAGGGGTCTTCTTTCTGGAACTGA	ATGGCTTTCGCGAAGCTCAAGTGGCCTGTTGACAGGCGCTGA	ATGGCTCTCCCGAAGCACTGGTGGGTTGCTCTCGGGGTCTGA	MAvsqlkgssfwn*	MAVSQLKGSSFWN*	MAFAKLKWPVDRR*	MALPKHWWVALGV*	GhrCyyTmAG	rrCCAChACr	0	J	FG09003.1	MG04008.1	0	YML025C	YML025C
9109	4040	an	AN0211.1	71.m15474	AO070321000033	0	-25	-11					ATGAACCGCTCATAA	ATGAACCGCTCATAA			MNRS*	MNRS*			TGCTCCGTTT	TTCCGTCACT	1	A	0	0	0	0	0
9111	4040	af	AN0211.1	71.m15474	AO070321000033	0			-44	-30			ATGATACCCCAATAG		ATGATACCCCAATAG		MIPQ*		MIPQ*		ACTTGCGTGC	AGAAGCAGCA	1	A	0	0	0	0	0
9157	4058	an	AN7559.1	72.m19579	AO070343000399	0	-42	-28					ATGACCCACGATTGA	ATGACCCACGATTGA			MTHD*	MTHD*			TTTCTCATAC	CTACGTTTAC	1	K	0	0	0	0	0
9162	4064	ao	AN3464.1	59.m09325	AO070265000042	0					-44	-33	ATGCACATCTAG			ATGCACATCTAG	MHI*			MHI*	GGTTCTCTAA	TGCTGTGGAA	1	O	0	0	0	0	0
9179	4070	an	AN6823.1	71.m15293	AO070314000102	1	-211	-173					ATGCCGCAGTGGGCATCCATGGCTCCGCTCCGTGTTTGA	ATGCCGCAGTGGGCATCCATGGCTCCGCTCCGTGTTTGA			MPQWASMAPLRV*	MPQWASMAPLRV*			TCCTGTGCAT	TATACATACA	0		0	0	0	0	0
9180	4070	an	AN6823.1	71.m15293	AO070314000102	1	-193	-173					ATGGCTCCGCTCCGTGTTTGA	ATGGCTCCGCTCCGTGTTTGA			MAPLRV*	MAPLRV*			GTGGGCATCC	TATACATACA	0		0	0	0	0	0
9181	4070	af	AN6823.1	71.m15293	AO070314000102	1			-257	-228			ATGACTACTCGGCTTGGTACCTTGCCATGA		ATGACTACTCGGCTTGGTACCTTGCCATGA		MTTRLGTLP*		MTTRLGTLP*		TCCTCCTGCA	GCGCCCTGTG	0		0	0	0	0	0
9182	4070	af	AN6823.1	71.m15293	AO070314000102	1			-231	-217			ATGAGCGCCCTGTGA		ATGAGCGCCCTGTGA		MSAL*		MSAL*		GTACCTTGCC	CCCCTTGTGT	0		0	0	0	0	0
9183	4070	af	AN6823.1	71.m15293	AO070314000102	1			-197	-78			ATGACGAGTTCTCGATCTCTGACCTTTATTGTGCATCTTACTGCAGCCATCCATGGATTTCAATCTACCTCCATCTGTCATATAACCTACACTCTACTTGTTCCTCTTTCGCCATTATAA		ATGACGAGTTCTCGATCTCTGACCTTTATTGTGCATCTTACTGCAGCCATCCATGGATTTCAATCTACCTCCATCTGTCATATAACCTACACTCTACTTGTTCCTCTTTCGCCATTATAA		MTSSRSLTFIVHLTAAIHGFQSTSICHITYTLLVPLSPL*		MTSSRSLTFIVHLTAAIHGFQSTSICHITYTLLVPLSPL*		TCATCTTTAT	CCGACACCTC	0		0	0	0	0	0
9184	4070	af	AN6823.1	71.m15293	AO070314000102	1			-145	-113			ATGGATTTCAATCTACCTCCATCTGTCATATAA		ATGGATTTCAATCTACCTCCATCTGTCATATAA		MDFNLPPSVI*		MDFNLPPSVI*		GCAGCCATCC	CCTACACTCT	0		0	0	0	0	0
9185	4070	ao	AN6823.1	71.m15293	AO070314000102	1					-350	-333	ATGGATCCTATGGATTGA			ATGGATCCTATGGATTGA	MDPMD*			MDPMD*	CCTTCCCTTC	CTTCCCCCGT	0		0	0	0	0	0
9186	4070	ao	AN6823.1	71.m15293	AO070314000102	1					-274	-239	ATGGAAAAGTCCCGATCTTTATTACAGATCCTTTGA			ATGGAAAAGTCCCGATCTTTATTACAGATCCTTTGA	MEKSRSLLQIL*			MEKSRSLLQIL*	TCATCTTTGA	TCCTTTGCAT	0		0	0	0	0	0
9187	4070	ao	AN6823.1	71.m15293	AO070314000102	1					-207	-187	ATGGGGCTTATCCGCACTTGA			ATGGGGCTTATCCGCACTTGA	MGLIRT*			MGLIRT*	GCAGTCACCC	TATTCCATAC	0		0	0	0	0	0
9188	4070	ao	AN6823.1	71.m15293	AO070314000102	1					-114	-70	ATGTATGTTCACATCTACCATCTCACCCCTCTCAACCCAAACTGA			ATGTATGTTCACATCTACCATCTCACCCCTCTCAACCCAAACTGA	MYVHIYHLTPLNPN*			MYVHIYHLTPLNPN*	TCATACAAAT	TTATCTCTCC	0		0	0	0	0	0
9191	4072	ao	AN2312.1	71.m15515	AO070323000042	0					-46	-23	ATGAGAGCAAGTTCATTCAGATAG			ATGAGAGCAAGTTCATTCAGATAG	MRASSFR*			MRASSFR*	CGGTTTCTGC	TACCGAGTAT	1	R	0	0	0	0	0
9193	4076	conserved	AN1168.1	70.m15052	AO070331000162	0	-37	-20	-37	-20	-37	-20	ATGTCTrCmTTCGGyTAG	ATGTCTGCATTCGGCTAG	ATGTCTACATTCGGCTAG	ATGTCTGCCTTCGGTTAG	MSaFG*	MSAFG*	MSTFG*	MSAFG*	GCrGyyTGCr	ysvAyyrwwy	1	PT	FG01364.1	0	0	YGR217W	YGR217W
9202	4079	af	AN4901.1	59.m08801	AO070338000047	0			-58	-47			ATGCGGATTTGA		ATGCGGATTTGA		MRI*		MRI*		CTTTCTCTGC	TTGTAGACCT	1		0	0	0	0	0
9231	4086	an	AN7781.1	57.m05368	AO070343000355	0	-51	-7					ATGACCAGATCCCATTTCTGCCCAATTGAGCTAGACCCTGAATAA	ATGACCAGATCCCATTTCTGCCCAATTGAGCTAGACCCTGAATAA			MTRSHFCPIELDPE*	MTRSHFCPIELDPE*			ATGAGTTCGA	AGCAAAATGA	1		0	0	0	0	0
9291	4111	an	AN0055.1	71.m15326	AO070314000132	1	-306	-268					ATGTGGACCCCAGGTTGCAAAGAGGAACGATGGGCCTAG	ATGTGGACCCCAGGTTGCAAAGAGGAACGATGGGCCTAG			MWTPGCKEERWA*	MWTPGCKEERWA*			GGACCGTCTA	GGCACGGCTG	0		0	0	0	0	0
9292	4111	an	AN0055.1	71.m15326	AO070314000132	1	-277	-215					ATGGGCCTAGGGCACGGCTGGAAAGCCCGATGCAGGCCAACCCTCTGGGAAATGTCTCGTTAG	ATGGGCCTAGGGCACGGCTGGAAAGCCCGATGCAGGCCAACCCTCTGGGAAATGTCTCGTTAG			MGLGHGWKARCRPTLWEMSR*	MGLGHGWKARCRPTLWEMSR*			AAGAGGAACG	CTAAACCAGA	0		0	0	0	0	0
9293	4111	an	AN0055.1	71.m15326	AO070314000132	1	-248	-117					ATGCAGGCCAACCCTCTGGGAAATGTCTCGTTAGCTAAACCAGATGGCGCTATGCATTCAAAAGACTCATGCATCCTGCATGGAACGCCAGACATCCCAATGGTTGGCTTGGTCCTGTATTCTAGTGTATGA	ATGCAGGCCAACCCTCTGGGAAATGTCTCGTTAGCTAAACCAGATGGCGCTATGCATTCAAAAGACTCATGCATCCTGCATGGAACGCCAGACATCCCAATGGTTGGCTTGGTCCTGTATTCTAGTGTATGA			MQANPLGNVSLAKPDGAMHSKDSCILHGTPDIPMVGLVLYSSV*	MQANPLGNVSLAKPDGAMHSKDSCILHGTPDIPMVGLVLYSSV*			GGAAAGCCCG	GTGCAAGCCA	0		0	0	0	0	0
9294	4111	an	AN0055.1	71.m15326	AO070314000132	1	-226	-215					ATGTCTCGTTAG	ATGTCTCGTTAG			MSR*	MSR*			CCTCTGGGAA	CTAAACCAGA	0		0	0	0	0	0
9295	4111	an	AN0055.1	71.m15326	AO070314000132	1	-197	-117					ATGCATTCAAAAGACTCATGCATCCTGCATGGAACGCCAGACATCCCAATGGTTGGCTTGGTCCTGTATTCTAGTGTATGA	ATGCATTCAAAAGACTCATGCATCCTGCATGGAACGCCAGACATCCCAATGGTTGGCTTGGTCCTGTATTCTAGTGTATGA			MHSKDSCILHGTPDIPMVGLVLYSSV*	MHSKDSCILHGTPDIPMVGLVLYSSV*			AGATGGCGCT	GTGCAAGCCA	0		0	0	0	0	0
9296	4111	an	AN0055.1	71.m15326	AO070314000132	1	-180	-124					ATGCATCCTGCATGGAACGCCAGACATCCCAATGGTTGGCTTGGTCCTGTATTCTAG	ATGCATCCTGCATGGAACGCCAGACATCCCAATGGTTGGCTTGGTCCTGTATTCTAG			MHPAWNARHPNGWLGPVF*	MHPAWNARHPNGWLGPVF*			CAAAAGACTC	TGTATGAGTG	0		0	0	0	0	0
9297	4111	an	AN0055.1	71.m15326	AO070314000132	1	-149	-117					ATGGTTGGCTTGGTCCTGTATTCTAGTGTATGA	ATGGTTGGCTTGGTCCTGTATTCTAGTGTATGA			MVGLVLYSSV*	MVGLVLYSSV*			AGACATCCCA	GTGCAAGCCA	0		0	0	0	0	0
9298	4111	an	AN0055.1	71.m15326	AO070314000132	1	-120	-34					ATGAGTGCAAGCCACACATCGCTGCTCTTCACCACTTACCTCACCCATTTCACTGCTACACCATACGACCCATATATCCTCTGTTGA	ATGAGTGCAAGCCACACATCGCTGCTCTTCACCACTTACCTCACCCATTTCACTGCTACACCATACGACCCATATATCCTCTGTTGA			MSASHTSLLFTTYLTHFTATPYDPYILC*	MSASHTSLLFTTYLTHFTATPYDPYILC*			ATTCTAGTGT	CTCGAGGTGT	0		0	0	0	0	0
9299	4111	af	AN0055.1	71.m15326	AO070314000132	1			-264	-193			ATGCATGCGGCACAGTGCCATAGCGGATGCCACGAACTTTACGAATGGCCTAGAGACTATTCGATTGTCTAA		ATGCATGCGGCACAGTGCCATAGCGGATGCCACGAACTTTACGAATGGCCTAGAGACTATTCGATTGTCTAA		MHAAQCHSGCHELYEWPRDYSIV*		MHAAQCHSGCHELYEWPRDYSIV*		GCCGAGGTCC	TGTAGGTGCA	0		0	0	0	0	0
9300	4111	af	AN0055.1	71.m15326	AO070314000132	1			-260	-168			ATGCGGCACAGTGCCATAGCGGATGCCACGAACTTTACGAATGGCCTAGAGACTATTCGATTGTCTAATGTAGGTGCACAGTTCGGGCAATAG		ATGCGGCACAGTGCCATAGCGGATGCCACGAACTTTACGAATGGCCTAGAGACTATTCGATTGTCTAATGTAGGTGCACAGTTCGGGCAATAG		MRHSAIADATNFTNGLETIRLSNVGAQFGQ*		MRHSAIADATNFTNGLETIRLSNVGAQFGQ*		AGGTCCATGC	CTCCATCTGG	0		0	0	0	0	0
9301	4111	af	AN0055.1	71.m15326	AO070314000132	1			-238	-212			ATGCCACGAACTTTACGAATGGCCTAG		ATGCCACGAACTTTACGAATGGCCTAG		MPRTLRMA*		MPRTLRMA*		GCCATAGCGG	AGACTATTCG	0		0	0	0	0	0
9302	4111	ao	AN0055.1	71.m15326	AO070314000132	1					-324	-268	ATGGTCCCTTTGTCTAATGTACGATCACGCTTTAGGAAAGAGAGAGAAGATGCCTGA			ATGGTCCCTTTGTCTAATGTACGATCACGCTTTAGGAAAGAGAGAGAAGATGCCTGA	MVPLSNVRSRFRKEREDA*			MVPLSNVRSRFRKEREDA*	CTATCAAGCG	GGGGAAGCGA	0		0	0	0	0	0
9303	4111	ao	AN0055.1	71.m15326	AO070314000132	1					-308	-213	ATGTACGATCACGCTTTAGGAAAGAGAGAGAAGATGCCTGAGGGGAAGCGACATCATGTGCCAACTCAAAAGGCTGCATGTGCCCTGCATCATTGA			ATGTACGATCACGCTTTAGGAAAGAGAGAGAAGATGCCTGAGGGGAAGCGACATCATGTGCCAACTCAAAAGGCTGCATGTGCCCTGCATCATTGA	MYDHALGKREKMPEGKRHHVPTQKAACALHH*			MYDHALGKREKMPEGKRHHVPTQKAACALHH*	CCTTTGTCTA	TTGATTGAGC	0		0	0	0	0	0
9304	4111	ao	AN0055.1	71.m15326	AO070314000132	1					-275	-213	ATGCCTGAGGGGAAGCGACATCATGTGCCAACTCAAAAGGCTGCATGTGCCCTGCATCATTGA			ATGCCTGAGGGGAAGCGACATCATGTGCCAACTCAAAAGGCTGCATGTGCCCTGCATCATTGA	MPEGKRHHVPTQKAACALHH*			MPEGKRHHVPTQKAACALHH*	GAGAGAGAAG	TTGATTGAGC	0		0	0	0	0	0
9305	4111	ao	AN0055.1	71.m15326	AO070314000132	1					-253	-209	ATGTGCCAACTCAAAAGGCTGCATGTGCCCTGCATCATTGATTGA			ATGTGCCAACTCAAAAGGCTGCATGTGCCCTGCATCATTGATTGA	MCQLKRLHVPCIID*			MCQLKRLHVPCIID*	AAGCGACATC	TTGAGCTTCA	0		0	0	0	0	0
9306	4111	ao	AN0055.1	71.m15326	AO070314000132	1					-231	-205	ATGTGCCCTGCATCATTGATTGATTGA			ATGTGCCCTGCATCATTGATTGATTGA	MCPASLID*			MCPASLID*	AAAAGGCTGC	GCTTCACAAG	0		0	0	0	0	0
9330	4117	af	AN6597.1	62.m03201	AO070326000046	0			-31	-17			ATGATCTTGCGGTAG		ATGATCTTGCGGTAG		MILR*		MILR*		GCTCTCTCGA	CCCCAACTCT	1	R	0	0	0	0	0
9334	4117	ao	AN6597.1	62.m03201	AO070326000046	0					-53	-15	ATGTTTCCCACACTGTCTTTCCTTGGACAAACTCCATAA			ATGTTTCCCACACTGTCTTTCCTTGGACAAACTCCATAA	MFPTLSFLGQTP*			MFPTLSFLGQTP*	CACCTGCTCC	TCGTTCTCTT	1	R	0	0	0	0	0
9362	4122	af	AN3018.1	59.m08991	AO070337000096	0			-54	-37			ATGGGCGTTCAGAAGTAG		ATGGGCGTTCAGAAGTAG		MGVQK*		MGVQK*		AAAAACTTGT	CAAAATTAAA	1	E	0	MG03562.1	0	0	0
9380	4128	an	AN2148.1	72.m19693	AO070343000197	0	-42	-22					ATGTATAATGTCGTTGTATGA	ATGTATAATGTCGTTGTATGA			MYNVVV*	MYNVVV*			ATCCTTGCGA	TTGTTTTGTT	1	S	0	0	0	0	0
9382	4128	af	AN2148.1	72.m19693	AO070343000197	1			-27	-7			ATGTCTTTCGTTTGCCTATAA		ATGTCTTTCGTTTGCCTATAA		MSFVCL*		MSFVCL*		ATGCCTTTGT	CCCACAATGG	1	S	0	0	0	0	0
9385	4128	ao	AN2148.1	72.m19693	AO070343000197	0					-34	-8	ATGTCTCTGTCTGCCTGCTTCTCTTGA			ATGTCTCTGTCTGCCTGCTTCTCTTGA	MSLSACFS*			MSLSACFS*	TTCCTGTAGA	TGGCACAATG	1	S	0	0	0	0	0
9389	4130	an	AN5902.1	72.m19228	AO070248000040	0	-17	-6					ATGGTCCATTGA	ATGGTCCATTGA			MVH*	MVH*			GCACCTTTGA	GAACTATGAA	1	OKIT	0	0	0	0	0
9400	4130	ao	AN5902.1	72.m19228	AO070248000040	0					-58	-26	ATGATTCTACTCTTTACTTTAATTCCAGCTTGA			ATGATTCTACTCTTTACTTTAATTCCAGCTTGA	MILLFTLIPA*			MILLFTLIPA*	CACTGACTCC	TGGTCAATTA	1	OKIT	0	0	0	0	0
9401	4130	ao	AN5902.1	72.m19228	AO070248000040	0					-26	-15	ATGGTCAATTAG			ATGGTCAATTAG	MVN*			MVN*	TTCCAGCTTG	CCCAAATCAA	1	OKIT	0	0	0	0	0
9404	4132	an	AN7652.1	57.m05411	AO070268000009	0	-41	-12					ATGCTTCTGGAAACCGACACTGCCTTTTAA	ATGCTTCTGGAAACCGACACTGCCTTTTAA			MLLETDTAF*	MLLETDTAF*			AAACCACTAC	ACAAGCCCTC	1	L	0	0	0	0	0
9411	4132	ao	AN7652.1	57.m05411	AO070268000009	0					-56	-21	ATGAATCTCATTGACACGAAACTAATGCTTATATGA			ATGAATCTCATTGACACGAAACTAATGCTTATATGA	MNLIDTKLMLI*			MNLIDTKLMLI*	AGGAACACAC	ATACCAAGGA	1	L	0	0	0	0	0
9412	4132	ao	AN7652.1	57.m05411	AO070268000009	0					-32	-21	ATGCTTATATGA			ATGCTTATATGA	MLI*			MLI*	CACGAAACTA	ATACCAAGGA	1	L	0	0	0	0	0
9422	4135	ao	AN6345.1	72.m19510	AO070275000008	0					-50	-39	ATGGCCACATGA			ATGGCCACATGA	MAT*			MAT*	AATCCAGGGG	AACGTACTGT	1	I	FG02055.1	0	0	0	0
9423	4135	ao	AN6345.1	72.m19510	AO070275000008	0					-42	-4	ATGAAACGTACTGTGATCGCAACACCACACCGTCGTTGA			ATGAAACGTACTGTGATCGCAACACCACACCGTCGTTGA	MKRTVIATPHRR*			MKRTVIATPHRR*	GGATGGCCAC	AACATGGAGA	1	I	FG02055.1	0	0	0	0
9451	4144	an	AN4557.1	57.m05569	AO070321000171	1	-92	-69					ATGGCTTGCTGTGCTAGATTATAA	ATGGCTTGCTGTGCTAGATTATAA			MACCARL*	MACCARL*			GAGGGCTTCC	ACTCTATATA	0	O	0	0	0	0	0
9453	4144	af	AN4557.1	57.m05569	AO070321000171	1			-83	-54			ATGGCTTCTGCGGACTTTTTTTCTAACTGA		ATGGCTTCTGCGGACTTTTTTTCTAACTGA		MASADFFSN*		MASADFFSN*		TAGAGCCTCT	AGTGAGCCTA	0	O	0	0	0	0	0
9455	4144	ao	AN4557.1	57.m05569	AO070321000171	1					-83	-54	ATGGATTCGGCAGTCTGCCATTGTCCCTGA			ATGGATTCGGCAGTCTGCCATTGTCCCTGA	MDSAVCHCP*			MDSAVCHCP*	GAGGACTTAT	ATCTCGATTG	0	O	0	0	0	0	0
9460	4147	af	AN6598.1	62.m03431	AO070326000047	0			-33	-19			ATGGGTAATGCCTGA		ATGGGTAATGCCTGA		MGNA*		MGNA*		TACATTATTG	CAGAGCCCGT	1	S	0	0	0	0	0
9480	4152	an	AN6087.1	72.m19077	AO070340000139	1	-205	-188					ATGCGCTGGATGAATTAA	ATGCGCTGGATGAATTAA			MRWMN*	MRWMN*			CAACTACCCA	GATAGGAATT	0	C	0	0	0	0	0
9481	4155	an	AN3928.1	69.m15000	AO070341000038	1	-284	-24					ATGAATAGCCTTTGGCTGGCATTCAATTCAATCATCAAGGTATCTCAGGTAATGTCTGGGCGTGGCCGGTGTTCGTTCTTATCCTTAGCATATCCCTACCTCAACTGTACTGGCCTTTATCCAGCGTTGAAGGGGACTGCCAAAGGCTCTGGGTTCGTTCTGAGAATATACGGTCAAAACTTGATCTGGATAATACCAGCGAAAGGATCATGCCTTCCCTTGCCTCTTCCTATAGTTAGTGGAATGGCTAACAGTCTATAG	ATGAATAGCCTTTGGCTGGCATTCAATTCAATCATCAAGGTATCTCAGGTAATGTCTGGGCGTGGCCGGTGTTCGTTCTTATCCTTAGCATATCCCTACCTCAACTGTACTGGCCTTTATCCAGCGTTGAAGGGGACTGCCAAAGGCTCTGGGTTCGTTCTGAGAATATACGGTCAAAACTTGATCTGGATAATACCAGCGAAAGGATCATGCCTTCCCTTGCCTCTTCCTATAGTTAGTGGAATGGCTAACAGTCTATAG			MNSLWLAFNSIIKVSQVMSGRGRCSFLSLAYPYLNCTGLYPALKGTAKGSGFVLRIYGQNLIWIIPAKGSCLPLPLPIVSGMANSL*	MNSLWLAFNSIIKVSQVMSGRGRCSFLSLAYPYLNCTGLYPALKGTAKGSGFVLRIYGQNLIWIIPAKGSCLPLPLPIVSGMANSL*			TACGGAAGTC	TCGAACCATT	0	R	FG02469.1	MG03098.1	NCU06110.1	0	0
9482	4155	an	AN3928.1	69.m15000	AO070341000038	1	-233	-24					ATGTCTGGGCGTGGCCGGTGTTCGTTCTTATCCTTAGCATATCCCTACCTCAACTGTACTGGCCTTTATCCAGCGTTGAAGGGGACTGCCAAAGGCTCTGGGTTCGTTCTGAGAATATACGGTCAAAACTTGATCTGGATAATACCAGCGAAAGGATCATGCCTTCCCTTGCCTCTTCCTATAGTTAGTGGAATGGCTAACAGTCTATAG	ATGTCTGGGCGTGGCCGGTGTTCGTTCTTATCCTTAGCATATCCCTACCTCAACTGTACTGGCCTTTATCCAGCGTTGAAGGGGACTGCCAAAGGCTCTGGGTTCGTTCTGAGAATATACGGTCAAAACTTGATCTGGATAATACCAGCGAAAGGATCATGCCTTCCCTTGCCTCTTCCTATAGTTAGTGGAATGGCTAACAGTCTATAG			MSGRGRCSFLSLAYPYLNCTGLYPALKGTAKGSGFVLRIYGQNLIWIIPAKGSCLPLPLPIVSGMANSL*	MSGRGRCSFLSLAYPYLNCTGLYPALKGTAKGSGFVLRIYGQNLIWIIPAKGSCLPLPLPIVSGMANSL*			ATCTCAGGTA	TCGAACCATT	0	R	FG02469.1	MG03098.1	NCU06110.1	0	0
9483	4155	an	AN3928.1	69.m15000	AO070341000038	1	-75	-46					ATGCCTTCCCTTGCCTCTTCCTATAGTTAG	ATGCCTTCCCTTGCCTCTTCCTATAGTTAG			MPSLASSYS*	MPSLASSYS*			CGAAAGGATC	TGGAATGGCT	0	R	FG02469.1	MG03098.1	NCU06110.1	0	0
9484	4155	an	AN3928.1	69.m15000	AO070341000038	1	-41	-24					ATGGCTAACAGTCTATAG	ATGGCTAACAGTCTATAG			MANSL*	MANSL*			AGTTAGTGGA	TCGAACCATT	1	R	FG02469.1	MG03098.1	NCU06110.1	0	0
9485	4155	af	AN3928.1	69.m15000	AO070341000038	1			-301	-167			ATGGAAGCCATGGAATCACTTTGGCTGGGCTGTTCATTCAATGATCAAGGTATCTCAGGTAAATCTTGGGCGTGGGCCGGTGTTCGTTCTCATTCATTGGCACAACAACGTTTATCTCTTTTTCGGAGCTCGTAA		ATGGAAGCCATGGAATCACTTTGGCTGGGCTGTTCATTCAATGATCAAGGTATCTCAGGTAAATCTTGGGCGTGGGCCGGTGTTCGTTCTCATTCATTGGCACAACAACGTTTATCTCTTTTTCGGAGCTCGTAA		MEAMESLWLGCSFNDQGISGKSWAWAGVRSHSLAQQRLSLFRSS*		MEAMESLWLGCSFNDQGISGKSWAWAGVRSHSLAQQRLSLFRSS*		TTTTCTATCG	CTCTTGACTG	0	R	FG02469.1	MG03098.1	NCU06110.1	0	0
9486	4155	af	AN3928.1	69.m15000	AO070341000038	1			-292	-167			ATGGAATCACTTTGGCTGGGCTGTTCATTCAATGATCAAGGTATCTCAGGTAAATCTTGGGCGTGGGCCGGTGTTCGTTCTCATTCATTGGCACAACAACGTTTATCTCTTTTTCGGAGCTCGTAA		ATGGAATCACTTTGGCTGGGCTGTTCATTCAATGATCAAGGTATCTCAGGTAAATCTTGGGCGTGGGCCGGTGTTCGTTCTCATTCATTGGCACAACAACGTTTATCTCTTTTTCGGAGCTCGTAA		MESLWLGCSFNDQGISGKSWAWAGVRSHSLAQQRLSLFRSS*		MESLWLGCSFNDQGISGKSWAWAGVRSHSLAQQRLSLFRSS*		GATGGAAGCC	CTCTTGACTG	0	R	FG02469.1	MG03098.1	NCU06110.1	0	0
9487	4155	af	AN3928.1	69.m15000	AO070341000038	1			-261	-160			ATGATCAAGGTATCTCAGGTAAATCTTGGGCGTGGGCCGGTGTTCGTTCTCATTCATTGGCACAACAACGTTTATCTCTTTTTCGGAGCTCGTAACTCTTGA		ATGATCAAGGTATCTCAGGTAAATCTTGGGCGTGGGCCGGTGTTCGTTCTCATTCATTGGCACAACAACGTTTATCTCTTTTTCGGAGCTCGTAACTCTTGA		MIKVSQVNLGRGPVFVLIHWHNNVYLFFGARNS*		MIKVSQVNLGRGPVFVLIHWHNNVYLFFGARNS*		TGTTCATTCA	CTGGAGTGCA	0	R	FG02469.1	MG03098.1	NCU06110.1	0	0
9488	4155	af	AN3928.1	69.m15000	AO070341000038	1			-128	-18			ATGGATGGGTTCGTTCTGAGATTATACGGTCAAAACTTGATCTGGATAATACCAGCGAAAGGATCATGCCTTCCCTCCGTTCTGTGTTGTCCACGTTCGTGGAATAGCTAA		ATGGATGGGTTCGTTCTGAGATTATACGGTCAAAACTTGATCTGGATAATACCAGCGAAAGGATCATGCCTTCCCTCCGTTCTGTGTTGTCCACGTTCGTGGAATAGCTAA		MDGFVLRLYGQNLIWIIPAKGSCLPSVLCCPRSWNS*		MDGFVLRLYGQNLIWIIPAKGSCLPSVLCCPRSWNS*		CACGGTGCCA	CCAGTTACAG	0	R	FG02469.1	MG03098.1	NCU06110.1	0	0
9489	4155	af	AN3928.1	69.m15000	AO070341000038	1			-124	-110			ATGGGTTCGTTCTGA		ATGGGTTCGTTCTGA		MGSF*		MGSF*		GTGCCAATGG	GATTATACGG	0	R	FG02469.1	MG03098.1	NCU06110.1	0	0
9490	4155	af	AN3928.1	69.m15000	AO070341000038	1			-63	-22			ATGCCTTCCCTCCGTTCTGTGTTGTCCACGTTCGTGGAATAG		ATGCCTTCCCTCCGTTCTGTGTTGTCCACGTTCGTGGAATAG		MPSLRSVLSTFVE*		MPSLRSVLSTFVE*		CGAAAGGATC	CTAACCAGTT	0	R	FG02469.1	MG03098.1	NCU06110.1	0	0
9491	4155	ao	AN3928.1	69.m15000	AO070341000038	1					-299	-180	ATGGAAGTCATGGAATACTTTTGGCTGGACTCTCACAATGATCAAGGTATCTTAGGTAACGTCTTTGGCGTGGGCCGGTGTTCGTTCCCAGTCATCGATGCATTCACATGCCCTCCCTAA			ATGGAAGTCATGGAATACTTTTGGCTGGACTCTCACAATGATCAAGGTATCTTAGGTAACGTCTTTGGCGTGGGCCGGTGTTCGTTCCCAGTCATCGATGCATTCACATGCCCTCCCTAA	MEVMEYFWLDSHNDQGILGNVFGVGRCSFPVIDAFTCPP*			MEVMEYFWLDSHNDQGILGNVFGVGRCSFPVIDAFTCPP*	AGGGCATACG	GCTGGGCCCT	0	R	FG02469.1	MG03098.1	NCU06110.1	0	0
9492	4155	ao	AN3928.1	69.m15000	AO070341000038	1					-290	-180	ATGGAATACTTTTGGCTGGACTCTCACAATGATCAAGGTATCTTAGGTAACGTCTTTGGCGTGGGCCGGTGTTCGTTCCCAGTCATCGATGCATTCACATGCCCTCCCTAA			ATGGAATACTTTTGGCTGGACTCTCACAATGATCAAGGTATCTTAGGTAACGTCTTTGGCGTGGGCCGGTGTTCGTTCCCAGTCATCGATGCATTCACATGCCCTCCCTAA	MEYFWLDSHNDQGILGNVFGVGRCSFPVIDAFTCPP*			MEYFWLDSHNDQGILGNVFGVGRCSFPVIDAFTCPP*	GATGGAAGTC	GCTGGGCCCT	0	R	FG02469.1	MG03098.1	NCU06110.1	0	0
9493	4155	ao	AN3928.1	69.m15000	AO070341000038	1					-262	-245	ATGATCAAGGTATCTTAG			ATGATCAAGGTATCTTAG	MIKVS*			MIKVS*	GACTCTCACA	GTAACGTCTT	0	R	FG02469.1	MG03098.1	NCU06110.1	0	0
9494	4155	ao	AN3928.1	69.m15000	AO070341000038	1					-202	-161	ATGCATTCACATGCCCTCCCTAAGCTGGGCCCTAGACTCTAG			ATGCATTCACATGCCCTCCCTAAGCTGGGCCCTAGACTCTAG	MHSHALPKLGPRL*			MHSHALPKLGPRL*	CCAGTCATCG	GATCCTAGTC	0	R	FG02469.1	MG03098.1	NCU06110.1	0	0
9495	4155	ao	AN3928.1	69.m15000	AO070341000038	1					-192	-148	ATGCCCTCCCTAAGCTGGGCCCTAGACTCTAGGATCCTAGTCTAG			ATGCCCTCCCTAAGCTGGGCCCTAGACTCTAGGATCCTAGTCTAG	MPSLSWALDSRILV*			MPSLSWALDSRILV*	ATGCATTCAC	AAGGACATGG	0	R	FG02469.1	MG03098.1	NCU06110.1	0	0
9496	4155	ao	AN3928.1	69.m15000	AO070341000038	1					-141	-40	ATGGCATCGATGGACTGGGTTCGTTCTGAGATTATACGGCTAAAACTTGATCTGGATAATACCAGCGAAAAGGATCATGCCTTCTCTCGTTCTTCCTGTTGA			ATGGCATCGATGGACTGGGTTCGTTCTGAGATTATACGGCTAAAACTTGATCTGGATAATACCAGCGAAAAGGATCATGCCTTCTCTCGTTCTTCCTGTTGA	MASMDWVRSEIIRLKLDLDNTSEKDHAFSRSSC*			MASMDWVRSEIIRLKLDLDNTSEKDHAFSRSSC*	CTAGAAGGAC	TGGAATGGCT	0	R	FG02469.1	MG03098.1	NCU06110.1	0	0
9497	4155	ao	AN3928.1	69.m15000	AO070341000038	1					-132	-40	ATGGACTGGGTTCGTTCTGAGATTATACGGCTAAAACTTGATCTGGATAATACCAGCGAAAAGGATCATGCCTTCTCTCGTTCTTCCTGTTGA			ATGGACTGGGTTCGTTCTGAGATTATACGGCTAAAACTTGATCTGGATAATACCAGCGAAAAGGATCATGCCTTCTCTCGTTCTTCCTGTTGA	MDWVRSEIIRLKLDLDNTSEKDHAFSRSSC*			MDWVRSEIIRLKLDLDNTSEKDHAFSRSSC*	CATGGCATCG	TGGAATGGCT	0	R	FG02469.1	MG03098.1	NCU06110.1	0	0
9498	4155	ao	AN3928.1	69.m15000	AO070341000038	1					-65	-21	ATGCCTTCTCTCGTTCTTCCTGTTGATGGAATGGCTAACAGATGA			ATGCCTTCTCTCGTTCTTCCTGTTGATGGAATGGCTAACAGATGA	MPSLVLPVDGMANR*			MPSLVLPVDGMANR*	GAAAAGGATC	TAGTCATTGC	0	R	FG02469.1	MG03098.1	NCU06110.1	0	0
9499	4155	ao	AN3928.1	69.m15000	AO070341000038	1					-35	-21	ATGGCTAACAGATGA			ATGGCTAACAGATGA	MANR*			MANR*	TGTTGATGGA	TAGTCATTGC	1	R	FG02469.1	MG03098.1	NCU06110.1	0	0
9500	4155	ao	AN3928.1	69.m15000	AO070341000038	1					-24	-4	ATGATAGTCATTGCAACTTGA			ATGATAGTCATTGCAACTTGA	MIVIAT*			MIVIAT*	TGGCTAACAG	AACATGTCTC	1	R	FG02469.1	MG03098.1	NCU06110.1	0	0
9524	4160	af	AN8165.1	53.m03816	AO070266000010	0			-55	-41			ATGCGCCATTCATAG		ATGCGCCATTCATAG		MRHS*		MRHS*		CATAACTGCT	CGATCTGTAT	1	A	0	0	0	0	0
9553	4172	af	AN7733.1	71.m15761	AO070325000151	0			-37	-17			ATGCTTAGCACAGGTATCTAG		ATGCTTAGCACAGGTATCTAG		MLSTGI*		MLSTGI*		TCACTCTCTC	ACTCCAACAT	1	E	0	0	0	YJR062C	0
9564	4179	an	AN1052.1	70.m15191	AO070336000059	0	-24	-7					ATGCAACAAGTCTTCTAG	ATGCAACAAGTCTTCTAG			MQQVF*	MQQVF*			CTAACAAGGA	AGCATTTTGT	1	WV	0	0	0	0	0
9565	4179	af	AN1052.1	70.m15191	AO070336000059	1			-347	-264			ATGTTTCTCTATCTTCTTTTCCTTACACTTTTCTTCCATCGAATATTTCCCCAGGCTTTATACGTCAGCCAACTGACTACCTAG		ATGTTTCTCTATCTTCTTTTCCTTACACTTTTCTTCCATCGAATATTTCCCCAGGCTTTATACGTCAGCCAACTGACTACCTAG		MFLYLLFLTLFFHRIFPQALYVSQLTT*		MFLYLLFLTLFFHRIFPQALYVSQLTT*		CCCTTGTTCT	TCCGTCATCC	0	WV	0	0	0	0	0
9566	4179	af	AN1052.1	70.m15191	AO070336000059	1			-199	-179			ATGCACGTTCCGGGTCGTTGA		ATGCACGTTCCGGGTCGTTGA		MHVPGR*		MHVPGR*		AGCTAGCTTG	TATTATAAGA	0	WV	0	0	0	0	0
9602	4189	af	AN6443.1	58.m08930	AO070238000002	0			-54	-34			ATGATGGTGTCGGAAATTTAA		ATGATGGTGTCGGAAATTTAA		MMVSEI*		MMVSEI*		GTTTCGATAC	TGTCATTTCA	1	Q	0	0	0	YGR281W	0
9603	4189	af	AN6443.1	58.m08930	AO070238000002	0			-51	-34			ATGGTGTCGGAAATTTAA		ATGGTGTCGGAAATTTAA		MVSEI*		MVSEI*		TCGATACATG	TGTCATTTCA	1	Q	0	0	0	YGR281W	0
9609	4192	ao	AN5776.1	69.m14821	AO070249000021	0					-52	-23	ATGTTTGACAACAGAATTGACGTAACATAG			ATGTTTGACAACAGAATTGACGTAACATAG	MFDNRIDVT*			MFDNRIDVT*	CACATTGACC	CTTATTCGTA	1	B	0	0	0	0	0
9613	4193	ao	AN8742.1	62.m03338	AO070250000039	0					-55	-29	ATGAATACCAGATGCGCCCGGGCCTAA			ATGAATACCAGATGCGCCCGGGCCTAA	MNTRCARA*			MNTRCARA*	ATATTTATCC	CAAGAAGCCA	1	BDL	0	0	0	0	0
9632	4199	af	AN0869.1	70.m15458	AO070320000020	0			-17	-3			ATGTCTCGCCGATAA		ATGTCTCGCCGATAA		MSRR*		MSRR*		TTTGGGATTA	AAATGTCTTC	1		0	0	0	0	0
9640	4201	ao	AN3909.1	69.m15021	AO070324000094	0					-24	-7	ATGAGAACCGGTCTCTAG			ATGAGAACCGGTCTCTAG	MRTGL*			MRTGL*	GGTCAGTATC	CCCATCATGG	1	L	0	0	0	0	0
9668	4206	af	AN2239.1	71.m15830	AO070326000142	0			-49	-14			ATGGTAACAATCCTGCCCCGCGCAGCAATTGTATGA		ATGGTAACAATCCTGCCCCGCGCAGCAATTGTATGA		MVTILPRAAIV*		MVTILPRAAIV*		AGGGGCAGAT	CTTATATCCC	1	C	0	0	0	0	0
9672	4206	ao	AN2239.1	71.m15830	AO070326000142	0					-58	-14	ATGGAGGGGTTATCAAACCCCAATACAAGACGAGCAGCGCGGTAA			ATGGAGGGGTTATCAAACCCCAATACAAGACGAGCAGCGCGGTAA	MEGLSNPNTRRAAR*			MEGLSNPNTRRAAR*	AACCGCAAAA	AAGCACCTGC	1	C	0	0	0	0	0
9680	4208	af	AN9066.1	66.m04520	AO070332000218	1			-78	-58			ATGCCTTTCTATCCGACTTAA		ATGCCTTTCTATCCGACTTAA		MPFYPT*		MPFYPT*		GAGAAAACAA	CTGAAGGTCG	0	C	FG00706.1	0	0	0	0
9717	4224	af	AN0854.1	70.m15453	AO070320000001	1			-266	-246			ATGCTTTTGTACAAGCCGTGA		ATGCTTTTGTACAAGCCGTGA		MLLYKP*		MLLYKP*		CAGTCCTGTA	GTGAGTGCGC	0	A	0	0	0	0	0
9723	4228	an	AN2757.1	59.m09254	AO070327000036	0	-51	-16					ATGGTCGTCGCGAAATCCTCGCTAAAACGGGTTTGA	ATGGTCGTCGCGAAATCCTCGCTAAAACGGGTTTGA			MVVAKSSLKRV*	MVVAKSSLKRV*			GCGGCAGCCG	TTGAACGGGC	1	R	0	0	0	0	0
9725	4228	ao	AN2757.1	59.m09254	AO070327000036	0					-44	-15	ATGATGGACCTTTCGATGTTGCTATTGTGA			ATGATGGACCTTTCGATGTTGCTATTGTGA	MMDLSMLLL*			MMDLSMLLL*	TCATATCCTC	TTGACCGGCT	1	R	0	0	0	0	0
9726	4228	ao	AN2757.1	59.m09254	AO070327000036	0					-29	-15	ATGTTGCTATTGTGA			ATGTTGCTATTGTGA	MLLL*			MLLL*	GGACCTTTCG	TTGACCGGCT	1	R	0	0	0	0	0
9739	4234	an	AN3038.1	59.m08979	AO070337000055	1	-59	-42					ATGCCCCTCGAGCAATGA	ATGCCCCTCGAGCAATGA			MPLEQ*	MPLEQ*			CAGCGCTACC	TCAAGAGGTC	1		0	0	0	0	0
9740	4234	af	AN3038.1	59.m08979	AO070337000055	1			-398	-384			ATGGTGGGAAAATGA		ATGGTGGGAAAATGA		MVGK*		MVGK*		CGCTGAAACC	TGAGGTCTGC	0		0	0	0	0	0
9753	4240	an	AN1408.1	55.m02915	AO070242000011	0	-57	-40					ATGCACTACCGACATTGA	ATGCACTACCGACATTGA			MHYRH*	MHYRH*			AGAAAAAGTA	GAGCTTTGGT	1	J	0	0	0	0	0
9754	4240	ao	AN1408.1	55.m02915	AO070242000011	0					-59	-21	ATGCGACAGCTCACTGGTGACAAGTTTTTGGCAGCTTGA			ATGCGACAGCTCACTGGTGACAAGTTTTTGGCAGCTTGA	MRQLTGDKFLAA*			MRQLTGDKFLAA*	ACAAAAAGAG	ACCACCTTTC	1	J	0	0	0	0	0
9774	4244	an	AN0576.1	69.m15269	AO070272000056	0	-49	-35					ATGATTGTTTTATGA	ATGATTGTTTTATGA			MIVL*	MIVL*			TTTCCTAAAC	ACCTATTCTT	1	T	FG05306.1	MG06100.1	0	0	0
9775	4244	an	AN0576.1	69.m15269	AO070272000056	0	-38	-21					ATGAACCTATTCTTATGA	ATGAACCTATTCTTATGA			MNLFL*	MNLFL*			TGATTGTTTT	AATGAAGACG	1	T	FG05306.1	MG06100.1	0	0	0
9779	4244	af	AN0576.1	69.m15269	AO070272000056	0			-50	-21			ATGAAATTCATTGTTCTTGTTAGCTCTTGA		ATGAAATTCATTGTTCTTGTTAGCTCTTGA		MKFIVLVSS*		MKFIVLVSS*		CTCTTAGTGG	GATGAGGTCG	1	T	FG05306.1	MG06100.1	0	0	0
9803	4248	af	AN1669.1	58.m07734	AO070299000051	0			-53	-12			ATGTTATGGTTTTATCTCCCCCTATATAAGATAGATACCTGA		ATGTTATGGTTTTATCTCCCCCTATATAAGATAGATACCTGA		MLWFYLPLYKIDT*		MLWFYLPLYKIDT*		ACAAAGTTCT	AAACCTCTAC	1	RP	0	0	0	0	0
9804	4248	af	AN1669.1	58.m07734	AO070299000051	0			-48	-25			ATGGTTTTATCTCCCCCTATATAA		ATGGTTTTATCTCCCCCTATATAA		MVLSPPI*		MVLSPPI*		GTTCTATGTT	GATAGATACC	1	RP	0	0	0	0	0
9815	4250	af	AN6245.1	72.m19412	AO070304000099	0			-57	-28			ATGCACCTCGCCACAAAATACCCTCTTTAA		ATGCACCTCGCCACAAAATACCCTCTTTAA		MHLATKYPL*		MHLATKYPL*		CACAAAGTAT	GACCCTCACT	1		0	0	0	0	0
9817	4251	af	AN3754.1	65.m07373	AO070309000055	0			-51	-34			ATGCAAACGTCCGGATAA		ATGCAAACGTCCGGATAA		MQTSG*		MQTSG*		TAATTGCGGA	CCGAACGCTG	1	T	0	0	0	0	0
9842	4263	an	AN4322.1	58.m08001	AO070230000013	0	-53	-6					ATGATAGCGAATCTTGTGGCAGATACCCCGAGACTCGGATCGCTTTAA	ATGATAGCGAATCTTGTGGCAGATACCCCGAGACTCGGATCGCTTTAA			MIANLVADTPRLGSL*	MIANLVADTPRLGSL*			AAGAATTACT	CGAAGATGTT	1	T	0	0	0	0	0
9845	4265	ao	AN3433.1	59.m09290	AO070265000008	1					-222	-178	ATGAAGAACAGCTGGAATAATATCACGTACAAGTCCGACTTTTAA			ATGAAGAACAGCTGGAATAATATCACGTACAAGTCCGACTTTTAA	MKNSWNNITYKSDF*			MKNSWNNITYKSDF*	CAGAACGCGA	TTTCCAGTGG	0		0	0	0	0	0
9867	4272	af	AN8202.1	53.m03772	AO070310000115	1			-45	-34			ATGCAAGTCTGA		ATGCAAGTCTGA		MQV*		MQV*		CACACGTTCG	ACTACGTACG	1		0	0	0	0	0
9869	4273	an	AN6859.1	71.m15272	AO070314000076	0	-14						ATGCTCTTGCGATAA	ATGCTCTTGCGATAA			MLLR*	MLLR*			ATCGATATTC	TGTACCACTA	1	AK	0	0	0	0	0
9870	4273	af	AN6859.1	71.m15272	AO070314000076	0			-14				ATGCTTTGGCGATAA		ATGCTTTGGCGATAA		MLWR*		MLWR*		TCGATTTTCC	TGTATCACTA	1	AK	0	0	0	0	0
9881	4277	ao	AN0925.1	70.m15533	AO070320000104	1					-177	-109	ATGACATACTCTTGGCTTGCGGAGGGTTTCTTGCGAACGACGGTATGGACTATTAGTTTCATTGAATAA			ATGACATACTCTTGGCTTGCGGAGGGTTTCTTGCGAACGACGGTATGGACTATTAGTTTCATTGAATAA	MTYSWLAEGFLRTTVWTISFIE*			MTYSWLAEGFLRTTVWTISFIE*	TTTTTTCCTC	TGCAAGCTCG	0	I	0	0	0	0	0
9882	4277	ao	AN0925.1	70.m15533	AO070320000104	1					-133	-122	ATGGACTATTAG			ATGGACTATTAG	MDY*			MDY*	GAACGACGGT	TTTCATTGAA	0	I	0	0	0	0	0
9886	4279	ao	AN8034.1	53.m03883	AO070322000125	0					-60	-10	ATGATCTTATCTTTGCCCCGGTTCTTCACACTCCCTGAATCCCGACTGTAA			ATGATCTTATCTTTGCCCCGGTTCTTCACACTCCCTGAATCCCGACTGTAA	MILSLPRFFTLPESRL*			MILSLPRFFTLPESRL*	TGTTTATGTC	TCCAACGTCA	1	A	0	0	0	0	0
9903	4283	ao	AN4751.1	59.m09234	AO070327000068	0					-50	-27	ATGTTTCTTTTTCTTTTCTCTTAG			ATGTTTCTTTTTCTTTTCTCTTAG	MFLFLFS*			MFLFLFS*	TAACCATTGA	AGGATCGATA	1	R	0	0	0	0	0
9933	4298	ao	AN3051.1	59.m09447	AO070285000008	0					-27	-16	ATGACCAAGTAA			ATGACCAAGTAA	MTK*			MTK*	ATCCATATCA	TATCCATCAT	1		0	0	0	0	0
9957	4308	an	AN2307.1	71.m15512	AO070323000045	1	-451	-440					ATGAATTTATAA	ATGAATTTATAA			MNL*	MNL*			TTAGCAGTAC	CTTTTGGTTT	0		0	0	0	0	0
9958	4308	an	AN2307.1	71.m15512	AO070323000045	1	-316	-248					ATGCGTAAACGCGCCCGAGCCGCTTCGTCCACGATCACCAGAATTACCGCGTCCTTCAGTTCGAACTAA	ATGCGTAAACGCGCCCGAGCCGCTTCGTCCACGATCACCAGAATTACCGCGTCCTTCAGTTCGAACTAA			MRKRARAASSTITRITASFSSN*	MRKRARAASSTITRITASFSSN*			GCGATATTGT	GCGTGCTTAT	0		0	0	0	0	0
9959	4308	an	AN2307.1	71.m15512	AO070323000045	1	-178	-47					ATGCCTACCAAAGATACCAGAACCGCGTCCGGCTTGGGTGCGTCTCCAGAGATCACAGGTCAAAGCTCTCTTCCTAGTACGTCCAACGTACCCTTGATGTCCGTATATATCCACTTGCTAAGGCTTTGTTAG	ATGCCTACCAAAGATACCAGAACCGCGTCCGGCTTGGGTGCGTCTCCAGAGATCACAGGTCAAAGCTCTCTTCCTAGTACGTCCAACGTACCCTTGATGTCCGTATATATCCACTTGCTAAGGCTTTGTTAG			MPTKDTRTASGLGASPEITGQSSLPSTSNVPLMSVYIHLLRLC*	MPTKDTRTASGLGASPEITGQSSLPSTSNVPLMSVYIHLLRLC*			TTGCGTCGCC	TCTCTCGTAT	0		0	0	0	0	0
9960	4308	an	AN2307.1	71.m15512	AO070323000045	1	-82	-47					ATGTCCGTATATATCCACTTGCTAAGGCTTTGTTAG	ATGTCCGTATATATCCACTTGCTAAGGCTTTGTTAG			MSVYIHLLRLC*	MSVYIHLLRLC*			CGTACCCTTG	TCTCTCGTAT	0		0	0	0	0	0
9961	4308	af	AN2307.1	71.m15512	AO070323000045	1			-537	-460			ATGCAAGCATATTCTACATCATTTGCGGAGAACATCTACACGCCGCGCGCTCTTGATTTCTACCCGCACGCGGTGTAG		ATGCAAGCATATTCTACATCATTTGCGGAGAACATCTACACGCCGCGCGCTCTTGATTTCTACCCGCACGCGGTGTAG		MQAYSTSFAENIYTPRALDFYPHAV*		MQAYSTSFAENIYTPRALDFYPHAV*		GTCAAAGCAC	CAGTAATTTC	0		0	0	0	0	0
9962	4308	af	AN2307.1	71.m15512	AO070323000045	1			-179	-159			ATGCCACAGTTACACGAATAA		ATGCCACAGTTACACGAATAA		MPQLHE*		MPQLHE*		AGGGGCTTAC	AGAAAATCAT	0		0	0	0	0	0
9963	4308	ao	AN2307.1	71.m15512	AO070323000045	1					-505	-431	ATGCGTATTTTATCGGCACTGACGCCACGCGCTATATGGATTTCCACGCCGCACGCGCCAGGCTCAATTGCCTAA			ATGCGTATTTTATCGGCACTGACGCCACGCGCTATATGGATTTCCACGCCGCACGCGCCAGGCTCAATTGCCTAA	MRILSALTPRAIWISTPHAPGSIA*			MRILSALTPRAIWISTPHAPGSIA*	AGATAACTAA	CACTTCCTGC	0		0	0	0	0	0
9964	4308	ao	AN2307.1	71.m15512	AO070323000045	1					-470	-408	ATGGATTTCCACGCCGCACGCGCCAGGCTCAATTGCCTAACACTTCCTGCACACTTCAAATAA			ATGGATTTCCACGCCGCACGCGCCAGGCTCAATTGCCTAACACTTCCTGCACACTTCAAATAA	MDFHAARARLNCLTLPAHFK*			MDFHAARARLNCLTLPAHFK*	CACGCGCTAT	TTATCAAGTT	0		0	0	0	0	0
9965	4308	ao	AN2307.1	71.m15512	AO070323000045	1					-274	-161	ATGCCTCCCAAGGAGAAGTCCACTCCGGACTCTGCGCCATCCCACGAGATCACCGGCCAGAGCGCTCTTCCTAGTACGCAGAATACACCCATCGTAATGGATATCGCCGGTTGA			ATGCCTCCCAAGGAGAAGTCCACTCCGGACTCTGCGCCATCCCACGAGATCACCGGCCAGAGCGCTCTTCCTAGTACGCAGAATACACCCATCGTAATGGATATCGCCGGTTGA	MPPKEKSTPDSAPSHEITGQSALPSTQNTPIVMDIAG*			MPPKEKSTPDSAPSHEITGQSALPSTQNTPIVMDIAG*	CGACCCCACG	CTGGTTCTGC	0		0	0	0	0	0
9966	4308	ao	AN2307.1	71.m15512	AO070323000045	1					-178	-161	ATGGATATCGCCGGTTGA			ATGGATATCGCCGGTTGA	MDIAG*			MDIAG*	ACCCATCGTA	CTGGTTCTGC	0		0	0	0	0	0
9985	4320	an	AN4378.1	58.m08998	AO070261000021	0	-38	-12					ATGGATTTCTCGCACTTTCCTAAGTGA	ATGGATTTCTCGCACTTTCCTAAGTGA			MDFSHFPK*	MDFSHFPK*			TCTAGCGGCC	GCCGTTACAC	1	G	0	0	0	0	0
10005	4324	ao	AN1847.1	58.m07663	AO070292000057	1					-182	-123	ATGGTCTGCTCCATCCATTGCATGACTCCTACTATGCTGTCTACTTCCACGCACGTGTAA			ATGGTCTGCTCCATCCATTGCATGACTCCTACTATGCTGTCTACTTCCACGCACGTGTAA	MVCSIHCMTPTMLSTSTHV*			MVCSIHCMTPTMLSTSTHV*	CCTGACTTGT	AGGTCAGGCG	0		0	0	0	0	0
10006	4324	ao	AN1847.1	58.m07663	AO070292000057	1					-161	-123	ATGACTCCTACTATGCTGTCTACTTCCACGCACGTGTAA			ATGACTCCTACTATGCTGTCTACTTCCACGCACGTGTAA	MTPTMLSTSTHV*			MTPTMLSTSTHV*	CATCCATTGC	AGGTCAGGCG	0		0	0	0	0	0
10007	4324	ao	AN1847.1	58.m07663	AO070292000057	1					-149	-123	ATGCTGTCTACTTCCACGCACGTGTAA			ATGCTGTCTACTTCCACGCACGTGTAA	MLSTSTHV*			MLSTSTHV*	GACTCCTACT	AGGTCAGGCG	0		0	0	0	0	0
10016	4329	af	AN3377.1	66.m04648	AO070317000062	0			-57	-34			ATGACGGGAAAGCCGCATCGTTAG		ATGACGGGAAAGCCGCATCGTTAG		MTGKPHR*		MTGKPHR*		CCCGCAGATT	CCCTGTTCAG	1		0	0	0	0	0
10034	4334	ao	AN6615.1	62.m03212	AO070326000064	0					-58	-38	ATGCGAGCTATAAAAAGCTGA			ATGCGAGCTATAAAAAGCTGA	MRAIKS*			MRAIKS*	AAAACGTGTC	CATTTTACCG	1	K	0	0	0	0	0
10035	4335	af	AN2238.1	71.m15825	AO070326000135	1			-122	-99			ATGACGGGTGCCATTGTGGCCTGA		ATGACGGGTGCCATTGTGGCCTGA		MTGAIVA*		MTGAIVA*		GCAATATCGC	TCCTTTCCCC	0	O	0	0	0	0	0
10039	4338	an	AN2966.1	59.m09423	AO070337000161	1	-182	-78					ATGTATTATGGGCTTCTGACCCAGATCAAAATGTTGTTGTTCAGCTGTTTATTCCTCAGGCCAACACGAATAACGTCTCCCCATCAACGCAACAACATCGCCTAG	ATGTATTATGGGCTTCTGACCCAGATCAAAATGTTGTTGTTCAGCTGTTTATTCCTCAGGCCAACACGAATAACGTCTCCCCATCAACGCAACAACATCGCCTAG			MYYGLLTQIKMLLFSCLFLRPTRITSPHQRNNIA*	MYYGLLTQIKMLLFSCLFLRPTRITSPHQRNNIA*			CGAGACAGCA	CTCTATCAGT	0	E	0	0	0	0	0
10040	4338	an	AN2966.1	59.m09423	AO070337000161	1	-175	-164					ATGGGCTTCTGA	ATGGGCTTCTGA			MGF*	MGF*			GCAATGTATT	CCCAGATCAA	0	E	0	0	0	0	0
10041	4338	an	AN2966.1	59.m09423	AO070337000161	1	-152	-78					ATGTTGTTGTTCAGCTGTTTATTCCTCAGGCCAACACGAATAACGTCTCCCCATCAACGCAACAACATCGCCTAG	ATGTTGTTGTTCAGCTGTTTATTCCTCAGGCCAACACGAATAACGTCTCCCCATCAACGCAACAACATCGCCTAG			MLLFSCLFLRPTRITSPHQRNNIA*	MLLFSCLFLRPTRITSPHQRNNIA*			CCAGATCAAA	CTCTATCAGT	0	E	0	0	0	0	0
10042	4339	conserved	AN2902.1	59.m08753	AO070338000104	1	-143	-132	-159	-148	-143	-132	ATGGmkCCmTAG	ATGGCTCCATAG	ATGGATCCCTAG	ATGGCGCCATAG	MaP*	MAP*	MDP*	MAP*	mkCkwCGGGC	Ckrybrrrmv	0	K	0	MG03485.1	NCU09300.1	0	0
10043	4339	an	AN2902.1	59.m08753	AO070338000104	1	-311	-282					ATGTACCTCCTCTTCTCAGCACAACCTTAA	ATGTACCTCCTCTTCTCAGCACAACCTTAA			MYLLFSAQP*	MYLLFSAQP*			GCAACCACTC	AGCGAAATAA	0	K	0	MG03485.1	NCU09300.1	0	0
10044	4339	af	AN2902.1	59.m08753	AO070338000104	1			-504	-415			ATGCATCACCAACGTTCCTCTCTCTCGTCTCATCATCTTCTTTTTTGGCCCCCAATTTTGATAGGAGTCAAACTTCATCGCATTGAATAA		ATGCATCACCAACGTTCCTCTCTCTCGTCTCATCATCTTCTTTTTTGGCCCCCAATTTTGATAGGAGTCAAACTTCATCGCATTGAATAA		MHHQRSSLSSHHLLFWPPILIGVKLHRIE*		MHHQRSSLSSHHLLFWPPILIGVKLHRIE*		CATTTCTTTC	TAACTCTCGC	0	K	0	MG03485.1	NCU09300.1	0	0
10045	4339	ao	AN2902.1	59.m08753	AO070338000104	1					-101	-42	ATGCATATTACCCCGTTGTCAATTGCTATTGTCAATAGAGGTAGGGTCATCAAGCATTAA			ATGCATATTACCCCGTTGTCAATTGCTATTGTCAATAGAGGTAGGGTCATCAAGCATTAA	MHITPLSIAIVNRGRVIKH*			MHITPLSIAIVNRGRVIKH*	CTCGCAATTC	ATCATTCAAA	0	K	0	MG03485.1	NCU09300.1	0	0
10061	4348	af	AN8783.1	71.m15597	AO070289000008	0			-59	-33			ATGACCGTAACTCATGGTCACATCTAA		ATGACCGTAACTCATGGTCACATCTAA		MTVTHGHI*		MTVTHGHI*		CAATGCGTCT	CATTACAGGA	1	D	FG05504.1	0	0	0	0
10068	4351	an	AN1652.1	58.m07719	AO070299000039	0	-58	-41					ATGTCGGGTCAATACTAA	ATGTCGGGTCAATACTAA			MSGQY*	MSGQY*			GCCAGGGTCC	TGCAGTACAG	1	R	0	0	0	0	0
10069	4351	ao	AN1652.1	58.m07719	AO070299000039	1					-53	-21	ATGACTATATATCATACAGGATGCCCATACTGA			ATGACTATATATCATACAGGATGCCCATACTGA	MTIYHTGCPY*			MTIYHTGCPY*	TCGTGGAAGG	TCCCTCGTCT	1	R	0	0	0	0	0
10075	4355	af	AN3391.1	70.m15714	AO070309000063	0			-39	-10			ATGGCCCCCCCGCGTTCGGAGCTGCGTTAG		ATGGCCCCCCCGCGTTCGGAGCTGCGTTAG		MAPPRSELR*		MAPPRSELR*		TGTTCCACCC	CTAGGCACCA	1	R	0	0	0	0	0
10076	4355	ao	AN3391.1	70.m15714	AO070309000063	0					-47	-3	ATGCACTCCACGCTCGGGCTGTATACAGCCTTGGATATTGCCTGA			ATGCACTCCACGCTCGGGCTGTATACAGCCTTGGATATTGCCTGA	MHSTLGLYTALDIA*			MHSTLGLYTALDIA*	TAGGTGCCAA	CCATGGCCTC	1	R	0	0	0	0	0
10118	4374	an	AN8271.1	53.m03690	AO070310000030	1	-274	-254					ATGCTTGCCTGTTGCTCCTGA	ATGCTTGCCTGTTGCTCCTGA			MLACCS*	MLACCS*			ACAACCGGCC	ACCTCGACGC	0	B	0	MG04359.1	0	0	0
10119	4374	af	AN8271.1	53.m03690	AO070310000030	1			-138	-79			ATGTTCTTCGGGATAAAACCATCGGCTGGGGATAAAGTACACAGGCTTGCCACTCATTGA		ATGTTCTTCGGGATAAAACCATCGGCTGGGGATAAAGTACACAGGCTTGCCACTCATTGA		MFFGIKPSAGDKVHRLATH*		MFFGIKPSAGDKVHRLATH*		CATTAACATG	AGCCCCCCAA	0	B	0	MG04359.1	0	0	0
10120	4378	an	AN4785.1	59.m09463	AO070329000062	1	-380	-351					ATGGGACCAATGATAAGCATCTGTGCTTGA	ATGGGACCAATGATAAGCATCTGTGCTTGA			MGPMISICA*	MGPMISICA*			AACGCCTCTA	TGCATCTTTC	0		0	0	0	0	0
10121	4378	an	AN4785.1	59.m09463	AO070329000062	1	-371	-351					ATGATAAGCATCTGTGCTTGA	ATGATAAGCATCTGTGCTTGA			MISICA*	MISICA*			AATGGGACCA	TGCATCTTTC	0		0	0	0	0	0
10122	4378	an	AN4785.1	59.m09463	AO070329000062	1	-351	-337					ATGCATCTTTCATGA	ATGCATCTTTCATGA			MHLS*	MHLS*			TCTGTGCTTG	GTTATCCCTG	0		0	0	0	0	0
10123	4378	an	AN4785.1	59.m09463	AO070329000062	1	-340	-326					ATGAGTTATCCCTGA	ATGAGTTATCCCTGA			MSYP*	MSYP*			TGCATCTTTC	AGCGTGCATA	0		0	0	0	0	0
10124	4378	af	AN4785.1	59.m09463	AO070329000062	1			-381	-361			ATGGGTTCGGTGACTGCATGA		ATGGGTTCGGTGACTGCATGA		MGSVTA*		MGSVTA*		TGACCTTCTC	GTTTATGACT	0		0	0	0	0	0
10125	4378	af	AN4785.1	59.m09463	AO070329000062	1			-364	-353			ATGAGTTTATGA		ATGAGTTTATGA		MSL*		MSL*		CGGTGACTGC	CTTCTGGTTG	0		0	0	0	0	0
10126	4378	ao	AN4785.1	59.m09463	AO070329000062	1					-576	-547	ATGGGTTCGGGGGTTTACATCTGTCGCTGA			ATGGGTTCGGGGGTTTACATCTGTCGCTGA	MGSGVYICR*			MGSGVYICR*	CTTCTTGTAT	TTTCTCTCCA	0		0	0	0	0	0
10127	4378	ao	AN4785.1	59.m09463	AO070329000062	1					-520	-509	ATGAACAATTGA			ATGAACAATTGA	MNN*			MNN*	TCCCAGGGAC	TTCCTTTCCA	0		0	0	0	0	0
10155	4394	an	AN2049.1	58.m07637	AO070292000016	1	-229	-194					ATGAGTCGAGGCCCATTCGTTATCTCTTTTAATTGA	ATGAGTCGAGGCCCATTCGTTATCTCTTTTAATTGA			MSRGPFVISFN*	MSRGPFVISFN*			CTCAAAGTCA	TACGCAAGTA	0	A	0	0	0	0	0
10158	4394	af	AN2049.1	58.m07637	AO070292000016	1			-176	-153			ATGCTGTTTTTGTTTCTCAACTAA		ATGCTGTTTTTGTTTCTCAACTAA		MLFLFLN*		MLFLFLN*		GAAAGCGTTT	CCCGACGCCA	0	A	0	0	0	0	0
10159	4394	ao	AN2049.1	58.m07637	AO070292000016	1					-168	-145	ATGTATTCCATTCACTTGTTATAG			ATGTATTCCATTCACTTGTTATAG	MYSIHLL*			MYSIHLL*	CTTATTGCTT	TATCGAAGAC	0	A	0	0	0	0	0
10164	4397	ao	AN0077.1	71.m16046	AO070311000138	0					-41	-30	ATGTCAATTTAA			ATGTCAATTTAA	MSI*			MSI*	TGCAGAATCC	CATATCCGTG	1	QR	0	MG08311.1	0	0	0
10182	4406	af	AN5829.1	72.m18956	AO070260000017	0			-47	-6			ATGGTTGAAAGCTACGACTCGTCTGTTCCGTCTGAAAGATAG		ATGGTTGAAAGCTACGACTCGTCTGTTCCGTCTGAAAGATAG		MVESYDSSVPSER*		MVESYDSSVPSER*		CTTTGTGTTG	GATTCATGGC	1	Z	0	0	0	0	0
10199	4413	conserved	AN4486.1	57.m05645	AO070311000037	0	-26		-26		-26		ATGCTyCTGyyGyyrCCrGyCCCGTrA	ATGCTTCTGTCGTCACCAGCCCCGTGA	ATGCTTCTGCTGCTGCCGGCCCCGTAA	ATGCTCCTGCTGCCACCAGTCCCGTAA	MLLssPaP*	MLLSSPAP*	MLLLLPAP*	MLLLPPVP*	vmdvskAATA	TGGGAGGTry	1		0	0	0	0	0
10202	4417	an	AN2852.1	59.m08695	AO070338000173	0	-21	-4					ATGCGGCGGTTCGATTGA	ATGCGGCGGTTCGATTGA			MRRFD*	MRRFD*			GTCAATTTGC	GTCATGGAAA	1		0	0	0	0	0
10206	4418	conserved	AN0412.1	54.m06662	AO070338000255	1	-228	-211	-292	-275	-300	-283	ATGysTykTATATyATrr	ATGTCTCTTATATTATAG	ATGCGTTGTATATCATGA	ATGCCTTGTATATCATGA	MslIl*	MSLIL*	MRCIS*	MPCIS*	CmyhmmCAyC	ymvTChTysk	0	RP	0	0	0	0	0
10207	4418	af	AN0412.1	54.m06662	AO070338000255	1			-278	-246			ATGACAATCATCGTCCTGCCGAGGACAACCTAA		ATGACAATCATCGTCCTGCCGAGGACAACCTAA		MTIIVLPRTT*		MTIIVLPRTT*		GTTGTATATC	TCTCCCGCCC	0	RP	0	0	0	0	0
10208	4418	ao	AN0412.1	54.m06662	AO070338000255	1					-286	-218	ATGACCGTCTTCGTCCTTTTTGGGACCCCATTCTCTTCTGCCCTCTGGCTCGATCGGTTACACGATTGA			ATGACCGTCTTCGTCCTTTTTGGGACCCCATTCTCTTCTGCCCTCTGGCTCGATCGGTTACACGATTGA	MTVFVLFGTPFSSALWLDRLHD*			MTVFVLFGTPFSSALWLDRLHD*	CTTGTATATC	TCGATACTGA	0	RP	0	0	0	0	0
10209	4418	ao	AN0412.1	54.m06662	AO070338000255	1					-175	-11	ATGAAATTATCGGATTATATTCTTTCCAAGCAATTGAATCCTCCAATCCTCGCCGTCGCCACGATCCTTTCCACCGTTCACCATACTACTACCTACCGAACTGTCTCTCTATCCTCACTTACCTTGTTTCTCTCACATACTCTTTTGTCGTCAGTATTAATTTAA			ATGAAATTATCGGATTATATTCTTTCCAAGCAATTGAATCCTCCAATCCTCGCCGTCGCCACGATCCTTTCCACCGTTCACCATACTACTACCTACCGAACTGTCTCTCTATCCTCACTTACCTTGTTTCTCTCACATACTCTTTTGTCGTCAGTATTAATTTAA	MKLSDYILSKQLNPPILAVATILSTVHHTTTYRTVSLSSLTLFLSHTLLSSVLI*			MKLSDYILSKQLNPPILAVATILSTVHHTTTYRTVSLSSLTLFLSHTLLSSVLI*	TATTTGATTG	TCGTAAAGTG	0	RP	0	0	0	0	0
10214	4420	af	AN2083.1	57.m05782	AO070341000236	0			-58	-35			ATGGTTTTGTTTCGTTCTTTTTAG		ATGGTTTTGTTTCGTTCTTTTTAG		MVLFRSF*		MVLFRSF*		ACTTAGACTC	TTCCAAAATA	1	S	0	0	0	0	0
10233	4429	an	AN7628.1	71.m15822	AO070294000038	0	-49	-2					ATGACCAGCCCCTCGAGTCGCAGTCGACACCGATTCACATACCGCTAA	ATGACCAGCCCCTCGAGTCGCAGTCGACACCGATTCACATACCGCTAA			MTSPSSRSRHRFTYR*	MTSPSSRSRHRFTYR*			TCTCAGATGC	TATGCCCCCT	1	A	0	0	0	0	0
10310	4452	an	AN8675.1	62.m03480	AO070315000094	0	-20						ATGCATGAGGTTGCTCCGTAA	ATGCATGAGGTTGCTCCGTAA			MHEVAP*	MHEVAP*			TCTGCCACCG	TGGGCAATCT	1	S	0	0	NCU07447.1	0	0
10339	4461	af	AN3623.1	58.m07410	AO070342000128	0			-49	-32			ATGTCCTACAGCAGCTGA		ATGTCCTACAGCAGCTGA		MSYSS*		MSYSS*		GTCTCGCCCA	CCTCCATTAA	1	OT	0	0	0	0	0
10379	4481	af	AN1500.1	55.m03010	AO070334000217	1			-111	-76			ATGGTGGGGACTAGCACAGTCGACTATCGAGCTTAG		ATGGTGGGGACTAGCACAGTCGACTATCGAGCTTAG		MVGTSTVDYRA*		MVGTSTVDYRA*		CTTTTACCGA	GACGTCTGCA	0	R	0	0	0	0	0
10385	4483	an	AN4030.1	54.m06559	AO070328000122	1	-58	-26					ATGAAATCGCAGAGATCTTGGCCGCAAAGTTAA	ATGAAATCGCAGAGATCTTGGCCGCAAAGTTAA			MKSQRSWPQS*	MKSQRSWPQS*			CGTGTTCCGT	GGCTAGAACG	1		0	0	0	0	0
10386	4483	af	AN4030.1	54.m06559	AO070328000122	1			-649	-617			ATGGGAAGTCATCTGATAACTTTACAGCGATGA		ATGGGAAGTCATCTGATAACTTTACAGCGATGA		MGSHLITLQR*		MGSHLITLQR*		CGAATGTTTT	CTGTGCTAAT	0		0	0	0	0	0
10422	4494	ao	AN6279.1	72.m19361	AO070308000038	0					-34	-23	ATGGCATGTTAA			ATGGCATGTTAA	MAC*			MAC*	TTGGATTCGA	CTGGCATATG	1	I	0	MG01721.1	0	0	0
10427	4495	af	AN5673.1	65.m07399	AO070309000086	0			-40	-23			ATGGAAGCTTTCCCATAA		ATGGAAGCTTTCCCATAA		MEAFP*		MEAFP*		GCTCTTGCTT	CCCCGAAACT	1		0	0	0	0	0
10429	4495	ao	AN5673.1	65.m07399	AO070309000086	0					-59	-48	ATGATGCAGTAG			ATGATGCAGTAG	MMQ*			MMQ*	GGTCCCCGTC	GGGCTTGACC	1		0	0	0	0	0
10438	4497	af	AN6572.1	62.m03169	AO070326000015	1			-50	-36			ATGCGATTAAGCTAG		ATGCGATTAAGCTAG		MRLS*		MRLS*		GCATTACATC	ACCAAGAGCT	1	R	0	0	0	0	0
10440	4497	ao	AN6572.1	62.m03169	AO070326000015	0					-50	-36	ATGCGAGCTCATTAG			ATGCGAGCTCATTAG	MRAH*			MRAH*	CCCGTTCGTC	ACCGGACACA	1	R	0	0	0	0	0
10441	4500	an	AN5836.1	72.m19916	AO070340000001	1	-500	-489					ATGAGTTTCTGA	ATGAGTTTCTGA			MSF*	MSF*			TTCCTATCTC	AAACAGCACG	0	K	0	0	0	0	0
10442	4500	ao	AN5836.1	72.m19916	AO070340000001	1					-556	-527	ATGTCGACGACTCGCTCTTTCGTGATCTGA			ATGTCGACGACTCGCTCTTTCGTGATCTGA	MSTTRSFVI*			MSTTRSFVI*	CATCACTTGC	CCGGTACCAC	0	K	0	0	0	0	0
10443	4501	af	AN5525.1	69.m15433	AO070341000364	1			-42	-13			ATGTATTGCGGCATTGCCCAACTCACATAG		ATGTATTGCGGCATTGCCCAACTCACATAG		MYCGIAQLT*		MYCGIAQLT*		CTCTCGTTGG	AGAGCTTCCA	1	CE	FG07953.1	0	NCU02366.1	0	0
10444	4501	ao	AN5525.1	69.m15433	AO070341000364	1					-42	-13	ATGTGTTGCGGCCTTGCTCACCTCGCATAG			ATGTGTTGCGGCCTTGCTCACCTCGCATAG	MCCGLAHLA*			MCCGLAHLA*	CTCTTCTTGG	AGAGCTTTCA	1	CE	FG07953.1	0	NCU02366.1	0	0
10445	4502	an	AN5491.1	69.m15461	AO070341000394	0	-52	-32					ATGACTTCTAATGTCTTCTAA	ATGACTTCTAATGTCTTCTAA			MTSNVF*	MTSNVF*			TTCTTTTCCG	GTGAGCCCCG	1	U	0	0	0	0	0
10446	4502	an	AN5491.1	69.m15461	AO070341000394	0	-42	-28					ATGTCTTCTAAGTGA	ATGTCTTCTAAGTGA			MSSK*	MSSK*			ATGACTTCTA	GCCCCGGTCG	1	U	0	0	0	0	0
10448	4502	af	AN5491.1	69.m15461	AO070341000394	0			-51	-28			ATGACATTCGAAACTCCTAAATGA		ATGACATTCGAAACTCCTAAATGA		MTFETPK*		MTFETPK*		CCCTGCTCCG	GCCGCTGGTT	1	U	0	0	0	0	0
10450	4502	ao	AN5491.1	69.m15461	AO070341000394	0					-52	-29	ATGACACCTGCGGTCTTTAAATGA			ATGACACCTGCGGTCTTTAAATGA	MTPAVFK*			MTPAVFK*	TACCCACCCG	GCCCCGGTCG	1	U	0	0	0	0	0
10457	4515	af	AN1175.1	70.m15042	AO070331000170	0			-31	-11			ATGAATAAAACAAAACCTTAG		ATGAATAAAACAAAACCTTAG		MNKTKP*		MNKTKP*		TTCTTCCTGC	ATCACCAGTC	1	A	0	0	0	0	0
10462	4522	ao	AN6644.1	62.m03242	AO070295000021	0					-39	-28	ATGTGTGCTTAG			ATGTGTGCTTAG	MCA*			MCA*	CGATCATTCG	TAGTACCATC	1	E	0	0	0	0	0
10482	4530	an	AN5749.1	69.m14847	AO070341000006	0	-23	-9					ATGCCCATCCCGTAA	ATGCCCATCCCGTAA			MPIP*	MPIP*			GACCCAGAGA	AAGCAGCAAT	1	E	0	0	0	0	0
10491	4532	af	AN4341.1	58.m07983	AO070240000016	0			-28	-14			ATGTGGTCCAGATAA		ATGTGGTCCAGATAA		MWSR*		MWSR*		TACACTGCCA	CAGGGACACC	1		0	0	0	0	0
10495	4532	ao	AN4341.1	58.m07983	AO070240000016	0					-52	-35	ATGGTAAATGACGGTTGA			ATGGTAAATGACGGTTGA	MVNDG*			MVNDG*	TGTCAACGCC	CTAGTTCAAT	1		0	0	0	0	0
10496	4532	ao	AN4341.1	58.m07983	AO070240000016	0					-45	-31	ATGACGGTTGACTAG			ATGACGGTTGACTAG	MTVD*			MTVD*	GCCATGGTAA	TTCAATGATG	1		0	0	0	0	0
10497	4533	ao	AN6371.1	72.m19489	AO070279000075	1					-88	-56	ATGTCATATCTCTTCATCGGACATACCAACTGA			ATGTCATATCTCTTCATCGGACATACCAACTGA	MSYLFIGHTN*			MSYLFIGHTN*	GCAATCTGGA	CCGCATCAGA	0		0	0	0	0	0
10500	4534	an	AN9010.1	52.m03996	AO070289000056	0	-60	-40					ATGCCAACGCTGGCCTCCTGA	ATGCCAACGCTGGCCTCCTGA			MPTLAS*	MPTLAS*			CTCTTTAAGA	GTGTAATTCC	1	G	0	0	0	0	0
10505	4535	an	AN2281.1	71.m15926	AO070295000058	1	-63	-31					ATGATGAACTGCATTGATCGGATACTTGCCTGA	ATGATGAACTGCATTGATCGGATACTTGCCTGA			MMNCIDRILA*	MMNCIDRILA*			ACCGAGTTAT	AGCTAACACC	0	MU	0	0	0	0	0
10506	4535	an	AN2281.1	71.m15926	AO070295000058	1	-60	-31					ATGAACTGCATTGATCGGATACTTGCCTGA	ATGAACTGCATTGATCGGATACTTGCCTGA			MNCIDRILA*	MNCIDRILA*			GAGTTATATG	AGCTAACACC	1	MU	0	0	0	0	0
10507	4535	af	AN2281.1	71.m15926	AO070295000058	1			-64	-41			ATGATATGTAATGAATTATTTTGA		ATGATATGTAATGAATTATTTTGA		MICNELF*		MICNELF*		TTTCAATCTC	ATGATTTGAC	0	MU	0	0	0	0	0
10508	4535	af	AN2281.1	71.m15926	AO070295000058	1			-54	-37			ATGAATTATTTTGAATGA		ATGAATTATTTTGAATGA		MNYFE*		MNYFE*		ATGATATGTA	TTTGACTTTC	1	MU	0	0	0	0	0
10512	4535	ao	AN2281.1	71.m15926	AO070295000058	1					-64	-53	ATGATGAGCTGA			ATGATGAGCTGA	MMS*			MMS*	TTTATACTTT	ATTGATTCAT	0	MU	0	0	0	0	0
10524	4538	an	AN1796.1	72.m19548	AO070309000135	0	-46	-32					ATGTGCCGACCTTGA	ATGTGCCGACCTTGA			MCRP*	MCRP*			CCGCGGAGCA	GCGCCTTTCA	1	L	0	0	0	YDR182W	0
10526	4538	af	AN1796.1	72.m19548	AO070309000135	0			-54	-37			ATGCAGCCTGCACATTAA		ATGCAGCCTGCACATTAA		MQPAH*		MQPAH*		AGTTCGAGCA	GCCACCTGCT	1	L	0	0	0	YDR182W	0
10530	4538	ao	AN1796.1	72.m19548	AO070309000135	0					-49	-11	ATGCCGCAGACAGCTTCGCTTTGGCCACTTTCGGGTTGA			ATGCCGCAGACAGCTTCGCTTTGGCCACTTTCGGGTTGA	MPQTASLWPLSG*			MPQTASLWPLSG*	AGGCGGAGCA	CACAGCAAGC	1	L	0	0	0	YDR182W	0
10543	4541	an	AN8120.1	53.m03831	AO070322000028	0	-35	-3					ATGGGGCTTTATTCTGGCATCGTACAGATGTAA	ATGGGGCTTTATTCTGGCATCGTACAGATGTAA			MGLYSGIVQM*	MGLYSGIVQM*			AGAATAAATT	TTATGGCGGC	1	S	0	0	0	0	0
10547	4543	an	AN1221.1	70.m15002	AO070331000223	0	-24	-13					ATGTATGAGTAG	ATGTATGAGTAG			MYE*	MYE*			CTGCAGTACA	ACCGACGCGT	1	T	0	0	0	0	0
10549	4543	af	AN1221.1	70.m15002	AO070331000223	0			-26	-9			ATGCTTGATGCCCGATAG		ATGCTTGATGCCCGATAG		MLDAR*		MLDAR*		CAAAATCATA	ACGCGTCCAT	1	T	0	0	0	0	0
10552	4543	ao	AN1221.1	70.m15002	AO070331000223	0					-24	-13	ATGCTTGCTTAA			ATGCTTGCTTAA	MLA*			MLA*	AAAGCACACA	CTAGACGCGT	1	T	0	0	0	0	0
10555	4545	af	AN2184.1	72.m19039	AO070340000082	0			-30	-19			ATGCGCCGATAA		ATGCGCCGATAA		MRR*		MRR*		CCGGAGATCA	ATACCACCAC	1	S	0	MG04663.1	NCU07577.1	0	0
10558	4545	ao	AN2184.1	72.m19039	AO070340000082	0					-39	-28	ATGTCCTTTTAG			ATGTCCTTTTAG	MSF*			MSF*	CTCCCACTCC	GTATTCAGCC	1	S	0	MG04663.1	NCU07577.1	0	0
10570	4552	af	AN7538.1	69.m15082	AO070324000011	0			-58	-35			ATGACAACTGCTATTTACATCTGA		ATGACAACTGCTATTTACATCTGA		MTTAIYI*		MTTAIYI*		ACATAACCGG	CGGAGTTCAG	1	KL	0	0	0	0	0
10571	4553	an	AN2760.1	59.m09264	AO070327000022	1	-290	-252					ATGGCATGGGCATGCTTTGGGTGTAACTCCAATGCTTAG	ATGGCATGGGCATGCTTTGGGTGTAACTCCAATGCTTAG			MAWACFGCNSNA*	MAWACFGCNSNA*			TTCTGGTTGG	GGTACTTAGG	0	E	0	0	0	0	0
10572	4553	an	AN2760.1	59.m09264	AO070327000022	1	-285	-265					ATGGGCATGCTTTGGGTGTAA	ATGGGCATGCTTTGGGTGTAA			MGMLWV*	MGMLWV*			GTTGGATGGC	CTCCAATGCT	0	E	0	0	0	0	0
10573	4553	an	AN2760.1	59.m09264	AO070327000022	1	-279	-265					ATGCTTTGGGTGTAA	ATGCTTTGGGTGTAA			MLWV*	MLWV*			TGGCATGGGC	CTCCAATGCT	0	E	0	0	0	0	0
10574	4553	an	AN2760.1	59.m09264	AO070327000022	1	-259	-203					ATGCTTAGGGTACTTAGGGAGCTTTATCCTGTTCTTTATCAGCCCGCTTCTTCCTGA	ATGCTTAGGGTACTTAGGGAGCTTTATCCTGTTCTTTATCAGCCCGCTTCTTCCTGA			MLRVLRELYPVLYQPASS*	MLRVLRELYPVLYQPASS*			TGTAACTCCA	CTCACCGTCT	0	E	0	0	0	0	0
10575	4553	af	AN2760.1	59.m09264	AO070327000022	1			-331	-158			ATGCTTGGGTCTCTCCATCTGTACAGCAAGACCTGCCTTGAAATAGCACCGTCAGTCCTCTTTCGTGCTTCTGAACTGTGTCCTCTTCGCCTTGAAAGTGTCATTCAATCATCAGCGTTCTGCACCCAAGGATTCGAGCATTATATATACGCTGTCCTCTACTTAGGGGATTAG		ATGCTTGGGTCTCTCCATCTGTACAGCAAGACCTGCCTTGAAATAGCACCGTCAGTCCTCTTTCGTGCTTCTGAACTGTGTCCTCTTCGCCTTGAAAGTGTCATTCAATCATCAGCGTTCTGCACCCAAGGATTCGAGCATTATATATACGCTGTCCTCTACTTAGGGGATTAG		MLGSLHLYSKTCLEIAPSVLFRASELCPLRLESVIQSSAFCTQGFEHYIYAVLYLGD*		MLGSLHLYSKTCLEIAPSVLFRASELCPLRLESVIQSSAFCTQGFEHYIYAVLYLGD*		TCGGTTGGGC	GAATCTCAGC	0	E	0	0	0	0	0
10576	4553	af	AN2760.1	59.m09264	AO070327000022	1			-123	-94			ATGTTGTTCATAGACATCCTTGTTTCGTGA		ATGTTGTTCATAGACATCCTTGTTTCGTGA		MLFIDILVS*		MLFIDILVS*		CTTTCCTTGG	CTCAACTTTA	0	E	0	0	0	0	0
10581	4556	an	AN1118.1	70.m15117	AO070331000110	1	-156	-58					ATGCCCTTCATGTGGTCCTCGATCGCCTTGACTACGGATCTCTGCTCTCACATCGCGGCACACCAGTGTCAATCTTGCTTTGCGTTATCGGACTACTAG	ATGCCCTTCATGTGGTCCTCGATCGCCTTGACTACGGATCTCTGCTCTCACATCGCGGCACACCAGTGTCAATCTTGCTTTGCGTTATCGGACTACTAG			MPFMWSSIALTTDLCSHIAAHQCQSCFALSDY*	MPFMWSSIALTTDLCSHIAAHQCQSCFALSDY*			CCTTATACCG	ATCATAACGG	0		0	0	0	0	0
10582	4556	an	AN1118.1	70.m15117	AO070331000110	1	-147	-58					ATGTGGTCCTCGATCGCCTTGACTACGGATCTCTGCTCTCACATCGCGGCACACCAGTGTCAATCTTGCTTTGCGTTATCGGACTACTAG	ATGTGGTCCTCGATCGCCTTGACTACGGATCTCTGCTCTCACATCGCGGCACACCAGTGTCAATCTTGCTTTGCGTTATCGGACTACTAG			MWSSIALTTDLCSHIAAHQCQSCFALSDY*	MWSSIALTTDLCSHIAAHQCQSCFALSDY*			GATGCCCTTC	ATCATAACGG	0		0	0	0	0	0
10583	4556	af	AN1118.1	70.m15117	AO070331000110	1			-163	-101			ATGTTGTCGTTAGCGCCACAGCAAACATTGAGATCAAACTACAAGTGCCTCCGGGCCAAATAG		ATGTTGTCGTTAGCGCCACAGCAAACATTGAGATCAAACTACAAGTGCCTCCGGGCCAAATAG		MLSLAPQQTLRSNYKCLRAK*		MLSLAPQQTLRSNYKCLRAK*		AACGCCCTTC	ATACTCAGAC	0		0	0	0	0	0
10584	4556	ao	AN1118.1	70.m15117	AO070331000110	1					-163	-92	ATGTTGCTGTCAGCGACACGACAAACATCGAGACATATTTACCGGTGTCCTCGGGCCTATCTGTTCTCGTGA			ATGTTGCTGTCAGCGACACGACAAACATCGAGACATATTTACCGGTGTCCTCGGGCCTATCTGTTCTCGTGA	MLLSATRQTSRHIYRCPRAYLFS*			MLLSATRQTSRHIYRCPRAYLFS*	TACGCCCTTC	GTGCCATAGT	0		0	0	0	0	0
10595	4562	af	AN1948.1	58.m07348	AO070342000213	0			-45	-28			ATGATCTTGTTTGGCTGA		ATGATCTTGTTTGGCTGA		MILFG*		MILFG*		ACAGGCTACT	GGACCTCACA	1	A	0	0	0	0	0
10596	4562	ao	AN1948.1	58.m07348	AO070342000213	0					-44	-27	ATGATCGGGTCTGGTTGA			ATGATCGGGTCTGGTTGA	MIGSG*			MIGSG*	GACAGGGGTA	AAGGAGAGTC	1	A	0	0	0	0	0
10617	4567	an	AN0889.1	70.m15493	AO070320000058	0	-26	-12					ATGAGCGACACCTAG	ATGAGCGACACCTAG			MSDT*	MSDT*			TTGTTGCAGG	CACAATATAC	1	R	FG09745.1	MG06080.1	0	YHR168W	0
10622	4567	af	AN0889.1	70.m15493	AO070320000058	0			-31	-5			ATGAATCAGGCCAAGGCTGCGATCTGA		ATGAATCAGGCCAAGGCTGCGATCTGA		MNQAKAAI*		MNQAKAAI*		GTTCTCCAGG	AATAATGACT	1	R	FG09745.1	MG06080.1	0	YHR168W	0
10639	4569	af	AN3421.1	67.m02958	AO070323000200	0			-36	-16			ATGATCTCAAGCCGGAGTTGA		ATGATCTCAAGCCGGAGTTGA		MISSRS*		MISSRS*		CTTCCCTTGA	TCGAGAGTCA	1		FG08465.1	MG09333.1	0	0	0
10642	4569	ao	AN3421.1	67.m02958	AO070323000200	0					-52	-14	ATGGTGTACATACTTCCGACTAGCAATTACATTCTATAA			ATGGTGTACATACTTCCGACTAGCAATTACATTCTATAA	MVYILPTSNYIL*			MVYILPTSNYIL*	GTACTATTTT	TTCTACATAC	1		FG08465.1	MG09333.1	0	0	0
10664	4577	ao	AN4365.1	58.m09005	AO070261000008	0					-27	-16	ATGTACCTTTGA			ATGTACCTTTGA	MYL*			MYL*	TCTGTAAACC	TTTTGACCAT	1	L	0	0	0	0	0
10668	4582	an	AN6261.1	72.m19396	AO070304000028	0	-42	-31					ATGGAACTCTAG	ATGGAACTCTAG			MEL*	MEL*			TTTTCGAAGA	AGACATGGGC	1		0	0	0	0	0
10669	4582	af	AN6261.1	72.m19396	AO070304000028	0			-42	-31			ATGGACAAATAA		ATGGACAAATAA		MDK*		MDK*		TGGACGAAGC	GGAAATGGGC	1		0	0	0	0	0
10671	4582	ao	AN6261.1	72.m19396	AO070304000028	0					-42	-31	ATGGGGTATTAA			ATGGGGTATTAA	MGY*			MGY*	CTACGAAGTA	GGAGATGGGC	1		0	0	0	0	0
10677	4583	af	AN6254.1	72.m19981	AO070304000034	0			-32	-6			ATGGCTGGAATGTCCACACCTTGTTGA		ATGGCTGGAATGTCCACACCTTGTTGA		MAGMSTPC*		MAGMSTPC*		TTTTTGATCT	TCAAGATGGC	1	C	0	0	0	YLR348C	0
10678	4583	af	AN6254.1	72.m19981	AO070304000034	0			-23	-6			ATGTCCACACCTTGTTGA		ATGTCCACACCTTGTTGA		MSTPC*		MSTPC*		TATGGCTGGA	TCAAGATGGC	1	C	0	0	0	YLR348C	0
10706	4592	an	AN0440.1	54.m06630	AO070338000297	0	-29	-3					ATGCTTAGCAGTCCAGTTACAACTTGA	ATGCTTAGCAGTCCAGTTACAACTTGA			MLSSPVTT*	MLSSPVTT*			CCACTAGCTT	AGATGCCCTC	1	B	0	0	0	YDR176W	0
10711	4593	an	AN3083.1	52.m03887	AO070339000016	1	-278	-261					ATGCATGGTGACAGTTGA	ATGCATGGTGACAGTTGA			MHGDS*	MHGDS*			CACACCGAGA	ATGGAGATTT	0	C	0	0	0	0	0
10712	4593	an	AN3083.1	52.m03887	AO070339000016	1	-274	-218					ATGGTGACAGTTGAATGGAGATTTTATTTCAGCAGAGAATCATCATATCATGACTAA	ATGGTGACAGTTGAATGGAGATTTTATTTCAGCAGAGAATCATCATATCATGACTAA			MVTVEWRFYFSRESSYHD*	MVTVEWRFYFSRESSYHD*			CCGAGAATGC	CATGAAGGTA	0	C	0	0	0	0	0
10713	4593	an	AN3083.1	52.m03887	AO070339000016	1	-260	-222					ATGGAGATTTTATTTCAGCAGAGAATCATCATATCATGA	ATGGAGATTTTATTTCAGCAGAGAATCATCATATCATGA			MEILFQQRIIIS*	MEILFQQRIIIS*			TGACAGTTGA	CTAACATGAA	0	C	0	0	0	0	0
10714	4593	an	AN3083.1	52.m03887	AO070339000016	1	-225	-187					ATGACTAACATGAAGGTAACATCCCATCTGCTCCATTAG	ATGACTAACATGAAGGTAACATCCCATCTGCTCCATTAG			MTNMKVTSHLLH*	MTNMKVTSHLLH*			TCATCATATC	GAAAAGGTGA	0	C	0	0	0	0	0
10715	4593	an	AN3083.1	52.m03887	AO070339000016	1	-216	-187					ATGAAGGTAACATCCCATCTGCTCCATTAG	ATGAAGGTAACATCCCATCTGCTCCATTAG			MKVTSHLLH*	MKVTSHLLH*			CATGACTAAC	GAAAAGGTGA	0	C	0	0	0	0	0
10716	4593	af	AN3083.1	52.m03887	AO070339000016	1			-371	-351			ATGTTCACGTCAATGTGGTAG		ATGTTCACGTCAATGTGGTAG		MFTSMW*		MFTSMW*		ACCGTAAGGT	TACAGACTGG	0	C	0	0	0	0	0
10717	4593	af	AN3083.1	52.m03887	AO070339000016	1			-268	-242			ATGTGCCTTGCGCCAGAACGGCAATGA		ATGTGCCTTGCGCCAGAACGGCAATGA		MCLAPERQ*		MCLAPERQ*		AATTGCCAGC	TGGGAATGCT	0	C	0	0	0	0	0
10718	4593	af	AN3083.1	52.m03887	AO070339000016	1			-245	-195			ATGATGGGAATGCTTCATGTAACATGTCAGAGTGATGTAGCACGCTGGTAA		ATGATGGGAATGCTTCATGTAACATGTCAGAGTGATGTAGCACGCTGGTAA		MMGMLHVTCQSDVARW*		MMGMLHVTCQSDVARW*		CAGAACGGCA	GCACTAGCTT	0	C	0	0	0	0	0
10719	4593	af	AN3083.1	52.m03887	AO070339000016	1			-242	-195			ATGGGAATGCTTCATGTAACATGTCAGAGTGATGTAGCACGCTGGTAA		ATGGGAATGCTTCATGTAACATGTCAGAGTGATGTAGCACGCTGGTAA		MGMLHVTCQSDVARW*		MGMLHVTCQSDVARW*		AACGGCAATG	GCACTAGCTT	0	C	0	0	0	0	0
10720	4593	af	AN3083.1	52.m03887	AO070339000016	1			-236	-195			ATGCTTCATGTAACATGTCAGAGTGATGTAGCACGCTGGTAA		ATGCTTCATGTAACATGTCAGAGTGATGTAGCACGCTGGTAA		MLHVTCQSDVARW*		MLHVTCQSDVARW*		AATGATGGGA	GCACTAGCTT	0	C	0	0	0	0	0
10721	4593	af	AN3083.1	52.m03887	AO070339000016	1			-222	-211			ATGTCAGAGTGA		ATGTCAGAGTGA		MSE*		MSE*		TTCATGTAAC	TGTAGCACGC	0	C	0	0	0	0	0
10722	4593	af	AN3083.1	52.m03887	AO070339000016	1			-174	-61			ATGCTCATAGGGCAGGGCTTCTCGTCGTATGAAAGGTGTGCATTAGTGTCAGACTTCCTCGTGTCAAGCTCATATTCGACAAGGGAATTGGACCATATGTATCCTCGTCAGTGA		ATGCTCATAGGGCAGGGCTTCTCGTCGTATGAAAGGTGTGCATTAGTGTCAGACTTCCTCGTGTCAAGCTCATATTCGACAAGGGAATTGGACCATATGTATCCTCGTCAGTGA		MLIGQGFSSYERCALVSDFLVSSSYSTRELDHMYPRQ*		MLIGQGFSSYERCALVSDFLVSSSYSTRELDHMYPRQ*		CGTATTATCA	CACCCACCTT	0	C	0	0	0	0	0
10723	4593	af	AN3083.1	52.m03887	AO070339000016	1			-146	-129			ATGAAAGGTGTGCATTAG		ATGAAAGGTGTGCATTAG		MKGVH*		MKGVH*		TTCTCGTCGT	TGTCAGACTT	0	C	0	0	0	0	0
10724	4593	af	AN3083.1	52.m03887	AO070339000016	1			-78	-61			ATGTATCCTCGTCAGTGA		ATGTATCCTCGTCAGTGA		MYPRQ*		MYPRQ*		ATTGGACCAT	CACCCACCTT	0	C	0	0	0	0	0
10725	4593	ao	AN3083.1	52.m03887	AO070339000016	1					-307	-290	ATGCTCCATGCGAACTAG			ATGCTCCATGCGAACTAG	MLHAN*			MLHAN*	TCATTAGTGC	CTGCATCGAA	0	C	0	0	0	0	0
10726	4593	ao	AN3083.1	52.m03887	AO070339000016	1					-300	-121	ATGCGAACTAGCTGCATCGAAACGTGGCATATGGGGCCAGGCTGCGTTGCATCCTTCCTGCACCGTCATCCTTCAGCAGCACAAAGTTCGCTGGTGGATGGGCCAATCCACACAACTCGGCATATTTATAGATCTGATCTATCTCCCTCTCGCAATGTAGTCCATCACTACACCAGATGA			ATGCGAACTAGCTGCATCGAAACGTGGCATATGGGGCCAGGCTGCGTTGCATCCTTCCTGCACCGTCATCCTTCAGCAGCACAAAGTTCGCTGGTGGATGGGCCAATCCACACAACTCGGCATATTTATAGATCTGATCTATCTCCCTCTCGCAATGTAGTCCATCACTACACCAGATGA	MRTSCIETWHMGPGCVASFLHRHPSAAQSSLVDGPIHTTRHIYRSDLSPSRNVVHHYTR*			MRTSCIETWHMGPGCVASFLHRHPSAAQSSLVDGPIHTTRHIYRSDLSPSRNVVHHYTR*	TGCATGCTCC	TCCTTTTATG	0	C	0	0	0	0	0
10727	4593	ao	AN3083.1	52.m03887	AO070339000016	1					-270	-121	ATGGGGCCAGGCTGCGTTGCATCCTTCCTGCACCGTCATCCTTCAGCAGCACAAAGTTCGCTGGTGGATGGGCCAATCCACACAACTCGGCATATTTATAGATCTGATCTATCTCCCTCTCGCAATGTAGTCCATCACTACACCAGATGA			ATGGGGCCAGGCTGCGTTGCATCCTTCCTGCACCGTCATCCTTCAGCAGCACAAAGTTCGCTGGTGGATGGGCCAATCCACACAACTCGGCATATTTATAGATCTGATCTATCTCCCTCTCGCAATGTAGTCCATCACTACACCAGATGA	MGPGCVASFLHRHPSAAQSSLVDGPIHTTRHIYRSDLSPSRNVVHHYTR*			MGPGCVASFLHRHPSAAQSSLVDGPIHTTRHIYRSDLSPSRNVVHHYTR*	AACGTGGCAT	TCCTTTTATG	0	C	0	0	0	0	0
10728	4593	ao	AN3083.1	52.m03887	AO070339000016	1					-203	-141	ATGGGCCAATCCACACAACTCGGCATATTTATAGATCTGATCTATCTCCCTCTCGCAATGTAG			ATGGGCCAATCCACACAACTCGGCATATTTATAGATCTGATCTATCTCCCTCTCGCAATGTAG	MGQSTQLGIFIDLIYLPLAM*			MGQSTQLGIFIDLIYLPLAM*	TCGCTGGTGG	TCCATCACTA	0	C	0	0	0	0	0
10729	4593	ao	AN3083.1	52.m03887	AO070339000016	1					-124	-101	ATGATCCTTTTATGCTTCCATTGA			ATGATCCTTTTATGCTTCCATTGA	MILLCFH*			MILLCFH*	ACTACACCAG	TGTTGTTTTA	0	C	0	0	0	0	0
10730	4593	ao	AN3083.1	52.m03887	AO070339000016	1					-113	-63	ATGCTTCCATTGATGTTGTTTTATTATATATATTTCTCTCCACACCGTTAG			ATGCTTCCATTGATGTTGTTTTATTATATATATTTCTCTCCACACCGTTAG	MLPLMLFYYIYFSPHR*			MLPLMLFYYIYFSPHR*	TGATCCTTTT	GCTTATCTGT	0	C	0	0	0	0	0
10731	4593	ao	AN3083.1	52.m03887	AO070339000016	1					-101	-63	ATGTTGTTTTATTATATATATTTCTCTCCACACCGTTAG			ATGTTGTTTTATTATATATATTTCTCTCCACACCGTTAG	MLFYYIYFSPHR*			MLFYYIYFSPHR*	GCTTCCATTG	GCTTATCTGT	0	C	0	0	0	0	0
10733	4594	ao	AN5489.1	69.m15463	AO070341000396	1					-188	-165	ATGTCCCCATCCGAGCGGCATTGA			ATGTCCCCATCCGAGCGGCATTGA	MSPSERH*			MSPSERH*	ACCCAACCCT	TATACCACAC	0	Z	0	0	0	0	0
10734	4594	ao	AN5489.1	69.m15463	AO070341000396	1					-120	-79	ATGCTGGGAGAGACAATAGTCCTTACAAGTCACCGCGTCTGA			ATGCTGGGAGAGACAATAGTCCTTACAAGTCACCGCGTCTGA	MLGETIVLTSHRV*			MLGETIVLTSHRV*	ACAACATTGA	TTCTTCGAAA	0	Z	0	0	0	0	0
10746	4601	af	AN2470.1	53.m03715	AO070310000056	1			-158	-99			ATGTCAGTGCCACGATCGACTCCTATAAGAACTACAACAATGCAAGAGACTCCATCATGA		ATGTCAGTGCCACGATCGACTCCTATAAGAACTACAACAATGCAAGAGACTCCATCATGA		MSVPRSTPIRTTTMQETPS*		MSVPRSTPIRTTTMQETPS*		CGAAGGGGTG	CGGAAAGGAA	0	ER	0	0	0	0	0
10747	4601	af	AN2470.1	53.m03715	AO070310000056	1			-119	-99			ATGCAAGAGACTCCATCATGA		ATGCAAGAGACTCCATCATGA		MQETPS*		MQETPS*		AACTACAACA	CGGAAAGGAA	0	ER	0	0	0	0	0
10748	4601	af	AN2470.1	53.m03715	AO070310000056	1			-102	-70			ATGACGGAAAGGAATCGATCATTTCAACTATAG		ATGACGGAAAGGAATCGATCATTTCAACTATAG		MTERNRSFQL*		MTERNRSFQL*		AGACTCCATC	CTGATATCTT	0	ER	0	0	0	0	0
10753	4601	ao	AN2470.1	53.m03715	AO070310000056	1					-126	-52	ATGTCAGTCCTGATGATGTACTCAACAACCACTATTGAAATATCACCTTTTAATCCACGCATGCACCATCCATAA			ATGTCAGTCCTGATGATGTACTCAACAACCACTATTGAAATATCACCTTTTAATCCACGCATGCACCATCCATAA	MSVLMMYSTTTIEISPFNPRMHHP*			MSVLMMYSTTTIEISPFNPRMHHP*	ATTCATAGTG	TTGAAGCCGT	0	ER	0	0	0	0	0
10754	4601	ao	AN2470.1	53.m03715	AO070310000056	1					-114	-52	ATGATGTACTCAACAACCACTATTGAAATATCACCTTTTAATCCACGCATGCACCATCCATAA			ATGATGTACTCAACAACCACTATTGAAATATCACCTTTTAATCCACGCATGCACCATCCATAA	MMYSTTTIEISPFNPRMHHP*			MMYSTTTIEISPFNPRMHHP*	GTCAGTCCTG	TTGAAGCCGT	0	ER	0	0	0	0	0
10755	4601	ao	AN2470.1	53.m03715	AO070310000056	1					-111	-52	ATGTACTCAACAACCACTATTGAAATATCACCTTTTAATCCACGCATGCACCATCCATAA			ATGTACTCAACAACCACTATTGAAATATCACCTTTTAATCCACGCATGCACCATCCATAA	MYSTTTIEISPFNPRMHHP*			MYSTTTIEISPFNPRMHHP*	AGTCCTGATG	TTGAAGCCGT	0	ER	0	0	0	0	0
10756	4601	ao	AN2470.1	53.m03715	AO070310000056	1					-66	-52	ATGCACCATCCATAA			ATGCACCATCCATAA	MHHP*			MHHP*	TAATCCACGC	TTGAAGCCGT	0	ER	0	0	0	0	0
10770	4603	ao	AN4177.1	56.m02500	AO070319000001	0					-57	-13	ATGTTCAACTCATTACTGAACTACATACTATACTTCGTTGCCTGA			ATGTTCAACTCATTACTGAACTACATACTATACTTCGTTGCCTGA	MFNSLLNYILYFVA*			MFNSLLNYILYFVA*	TTACTTTAGT	ACGTACTAGA	1		0	0	0	0	0
10772	4604	an	AN0977.1	70.m15615	AO070320000180	0	-33	-19					ATGCGCAGCCTGTAA	ATGCGCAGCCTGTAA			MRSL*	MRSL*			ACGTGGATCT	TTGTTATCGT	1		0	0	0	0	0
10773	4604	ao	AN0977.1	70.m15615	AO070320000180	0					-33	-19	ATGCGCCAGCCCTAA			ATGCGCCAGCCCTAA	MRQP*			MRQP*	ATCTGTTTTT	TTGACCTCAG	1		0	0	0	0	0
10794	4620	af	AN6104.1	72.m19098	AO070340000185	1			-296	-213			ATGTCACATCGCAAATCGGACGAACACATCTGCGCCAATTCTTTGATTCAGTGTACGAATCGATCTGGGGAACAGAAAAGATAA		ATGTCACATCGCAAATCGGACGAACACATCTGCGCCAATTCTTTGATTCAGTGTACGAATCGATCTGGGGAACAGAAAAGATAA		MSHRKSDEHICANSLIQCTNRSGEQKR*		MSHRKSDEHICANSLIQCTNRSGEQKR*		CAACCAGTGG	GGGGACTATT	0	AJ	0	0	0	0	0
10800	4626	an	AN1511.1	55.m03024	AO070334000229	1	-30	-19					ATGCAGCACTGA	ATGCAGCACTGA			MQH*	MQH*			ACACCGCTTC	GTTTTCCTCG	1	U	0	0	0	0	0
10801	4626	af	AN1511.1	55.m03024	AO070334000229	1			-37	-23			ATGCGAGGCTGGTAA		ATGCGAGGCTGGTAA		MRGW*		MRGW*		CTGGGCTCAA	TAATTCTCCC	1	U	0	0	0	0	0
10804	4638	af	AN1467.1	55.m02969	AO070306000090	1			-99	-19			ATGGTCCAGCAGACAATATCGTTGTACAGAAGTATTCTGCTGGAGGGTCTTGGTATTCTGAGGGACAGGGCCCTCCGGTGA		ATGGTCCAGCAGACAATATCGTTGTACAGAAGTATTCTGCTGGAGGGTCTTGGTATTCTGAGGGACAGGGCCCTCCGGTGA		MVQQTISLYRSILLEGLGILRDRALR*		MVQQTISLYRSILLEGLGILRDRALR*		CGTTCTTCAA	CGATCCTGCT	0	T	0	MG00166.1	NCU00958.1	0	0
10805	4638	ao	AN1467.1	55.m02969	AO070306000090	1					-102	-31	ATGTTCCCAACAGACGGGTCAAAGGAAAATTCCCTATCGCTCTTTCGCGAGGGCTTGAATTGCGTTACTTAG			ATGTTCCCAACAGACGGGTCAAAGGAAAATTCCCTATCGCTCTTTCGCGAGGGCTTGAATTGCGTTACTTAG	MFPTDGSKENSLSLFREGLNCVT*			MFPTDGSKENSLSLFREGLNCVT*	ATTCTGTTGC	CGCCCTTCGG	0	T	0	MG00166.1	NCU00958.1	0	0
10809	4647	an	AN8884.1	56.m02296	AO070293000016	1	-13	-2					ATGCTTCGCTAA	ATGCTTCGCTAA			MLR*	MLR*			TCTGAGGCTG	TATGACCGCT	1		0	0	0	0	0
10811	4647	ao	AN8884.1	56.m02296	AO070293000016	1					-218	-201	ATGCACGTCTGGTCCTGA			ATGCACGTCTGGTCCTGA	MHVWS*			MHVWS*	TGTCTCAAAC	AACCTCTCAT	0		0	0	0	0	0
10812	4647	ao	AN8884.1	56.m02296	AO070293000016	1					-23	-3	ATGATTACCATTTGCCCGTGA			ATGATTACCATTTGCCCGTGA	MITICP*			MITICP*	TTTAACTCCA	AGATGGCTGC	1		0	0	0	0	0
10834	4661	af	AN6707.1	65.m07278	AO070339000137	0			-53	-30			ATGAGAGTGCCATCTCTCACATGA		ATGAGAGTGCCATCTCTCACATGA		MRVPSLT*		MRVPSLT*		GAGGCGAGCG	CTGACATGCC	1	KL	0	0	0	0	0
10859	4674	ao	AN0560.1	69.m15287	AO070272000037	0					-43	-11	ATGAATCTGAAGCGTTCCCTCCTGGCTTCGTGA			ATGAATCTGAAGCGTTCCCTCCTGGCTTCGTGA	MNLKRSLLAS*			MNLKRSLLAS*	CCTCTTCCTC	TCCAGACAAG	1	U	FG09816.1	0	0	0	0
10880	4680	af	AN6074.1	72.m19065	AO070340000118	1			-175	-155			ATGAAATTGTTACTTATCTAG		ATGAAATTGTTACTTATCTAG		MKLLLI*		MKLLLI*		CTTTGAACTG	AACATCCTAC	0	A	0	0	0	0	0
10881	4681	an	AN5730.1	54.m06849	AO070341000031	1	-346	-311					ATGCATACGTACTCCAGACTCACTTTGTTTACATGA	ATGCATACGTACTCCAGACTCACTTTGTTTACATGA			MHTYSRLTLFT*	MHTYSRLTLFT*			GACGATTGAG	CTGGCTTCAC	0		0	0	0	0	0
10882	4681	an	AN5730.1	54.m06849	AO070341000031	1	-314	-201					ATGACTGGCTTCACCATCGCCCTTGCTCATTACCTTCAAAACCACGCTGGCCAGATCCTTGACCAGCATCGGGTTCGCTACATCACTCAGGATTGCCATTGTACGAACTCTTGA	ATGACTGGCTTCACCATCGCCCTTGCTCATTACCTTCAAAACCACGCTGGCCAGATCCTTGACCAGCATCGGGTTCGCTACATCACTCAGGATTGCCATTGTACGAACTCTTGA			MTGFTIALAHYLQNHAGQILDQHRVRYITQDCHCTNS*	MTGFTIALAHYLQNHAGQILDQHRVRYITQDCHCTNS*			CTTTGTTTAC	AGGTGTTAAC	0		0	0	0	0	0
10883	4681	an	AN5730.1	54.m06849	AO070341000031	1	-96	-49					ATGTCTCAAAGTCGGGCTGCTCATTGCACCTCTGCCTACGTTGCCTGA	ATGTCTCAAAGTCGGGCTGCTCATTGCACCTCTGCCTACGTTGCCTGA			MSQSRAAHCTSAYVA*	MSQSRAAHCTSAYVA*			ACAGCCTCCA	AATCTCGTGC	0		0	0	0	0	0
10884	4681	af	AN5730.1	54.m06849	AO070341000031	1			-333	-244			ATGTTTACTGTTGCTGTTACCTTCATTTTTGCCTCTCGCTCCTACACTCTTGATACTTTCTTCGCAAGGGCGTCTTCACTCGAACCTTAA		ATGTTTACTGTTGCTGTTACCTTCATTTTTGCCTCTCGCTCCTACACTCTTGATACTTTCTTCGCAAGGGCGTCTTCACTCGAACCTTAA		MFTVAVTFIFASRSYTLDTFFARASSLEP*		MFTVAVTFIFASRSYTLDTFFARASSLEP*		ATTGCCTGTG	TGCAGAACAG	0		0	0	0	0	0
10885	4681	af	AN5730.1	54.m06849	AO070341000031	1			-244	-113			ATGCAGAACAGCCTACTAAATCCATCGAATTTATCGATCCCCTCCCATGAAACAGAGGAACTTCAAGATCGTCCCACTGTACAGTTCTGCTCCATGTCGGTCGATCTGGTGTCTGGCCCGCGCCTACTCTAA		ATGCAGAACAGCCTACTAAATCCATCGAATTTATCGATCCCCTCCCATGAAACAGAGGAACTTCAAGATCGTCCCACTGTACAGTTCTGCTCCATGTCGGTCGATCTGGTGTCTGGCCCGCGCCTACTCTAA		MQNSLLNPSNLSIPSHETEELQDRPTVQFCSMSVDLVSGPRLL*		MQNSLLNPSNLSIPSHETEELQDRPTVQFCSMSVDLVSGPRLL*		TCGAACCTTA	ATATAATCGT	0		0	0	0	0	0
10886	4681	af	AN5730.1	54.m06849	AO070341000031	1			-198	-31			ATGAAACAGAGGAACTTCAAGATCGTCCCACTGTACAGTTCTGCTCCATGTCGGTCGATCTGGTGTCTGGCCCGCGCCTACTCTAAATATAATCGTGACAAGCTAAGATCATCGATCTCGCTAGATGCCTCGCGCATCATCTCAGATCGCAGTCTTCGTATCCACTAG		ATGAAACAGAGGAACTTCAAGATCGTCCCACTGTACAGTTCTGCTCCATGTCGGTCGATCTGGTGTCTGGCCCGCGCCTACTCTAAATATAATCGTGACAAGCTAAGATCATCGATCTCGCTAGATGCCTCGCGCATCATCTCAGATCGCAGTCTTCGTATCCACTAG		MKQRNFKIVPLYSSAPCRSIWCLARAYSKYNRDKLRSSISLDASRIISDRSLRIH*		MKQRNFKIVPLYSSAPCRSIWCLARAYSKYNRDKLRSSISLDASRIISDRSLRIH*		ATCCCCTCCC	ACACTCTGAC	0		0	0	0	0	0
10887	4681	af	AN5730.1	54.m06849	AO070341000031	1			-151	-113			ATGTCGGTCGATCTGGTGTCTGGCCCGCGCCTACTCTAA		ATGTCGGTCGATCTGGTGTCTGGCCCGCGCCTACTCTAA		MSVDLVSGPRLL*		MSVDLVSGPRLL*		GTTCTGCTCC	ATATAATCGT	0		0	0	0	0	0
10888	4681	ao	AN5730.1	54.m06849	AO070341000031	1					-461	-258	ATGCTCGATCATCTCACGTTTCCGACTTCACTTCTGGATTCTGCCCTAATCCCTCCCCTCGTATACAGAATCCCTTCTCTTCAGAACCTTCAAAACGTGCACCCTAGATTTATTTACTCCTCTCCATGCCGGCCTACCCTGCCTCCACACACCCCCGCTGCGAGTCAATCTAGAAAACGCCGATCAACGGTCTTTCTGGCATAG			ATGCTCGATCATCTCACGTTTCCGACTTCACTTCTGGATTCTGCCCTAATCCCTCCCCTCGTATACAGAATCCCTTCTCTTCAGAACCTTCAAAACGTGCACCCTAGATTTATTTACTCCTCTCCATGCCGGCCTACCCTGCCTCCACACACCCCCGCTGCGAGTCAATCTAGAAAACGCCGATCAACGGTCTTTCTGGCATAG	MLDHLTFPTSLLDSALIPPLVYRIPSLQNLQNVHPRFIYSSPCRPTLPPHTPAASQSRKRRSTVFLA*			MLDHLTFPTSLLDSALIPPLVYRIPSLQNLQNVHPRFIYSSPCRPTLPPHTPAASQSRKRRSTVFLA*	TCTGTTTACC	GCGTTGACGG	0		0	0	0	0	0
10889	4681	ao	AN5730.1	54.m06849	AO070341000031	1					-336	-289	ATGCCGGCCTACCCTGCCTCCACACACCCCCGCTGCGAGTCAATCTAG			ATGCCGGCCTACCCTGCCTCCACACACCCCCGCTGCGAGTCAATCTAG	MPAYPASTHPRCESI*			MPAYPASTHPRCESI*	ACTCCTCTCC	AAAACGCCGA	0		0	0	0	0	0
10890	4681	ao	AN5730.1	54.m06849	AO070341000031	1					-243	-214	ATGCCACTTGGGATAGATATATCTTCATAG			ATGCCACTTGGGATAGATATATCTTCATAG	MPLGIDISS*			MPLGIDISS*	TGACGGTCTT	CAATATCGAA	0		0	0	0	0	0
10891	4681	ao	AN5730.1	54.m06849	AO070341000031	1					-115	-104	ATGTGCACTTGA			ATGTGCACTTGA	MCT*			MCT*	TTTGTCTCAA	CGAAGAAGAG	0		0	0	0	0	0
10896	4682	af	AN1151.1	69.m15307	AO070226000022	0			-39	-28			ATGTTACTTTGA		ATGTTACTTTGA		MLL*		MLL*		TTCATCAATT	GATCCAATCG	1	G	FG09485.1	MG01335.1	NCU04071.1	0	0
10923	4689	ao	AN6132.1	72.m19030	AO070340000067	1					-93	-76	ATGCATTTCCACTGGTAA			ATGCATTTCCACTGGTAA	MHFHW*			MHFHW*	CTTTGAGATC	CGGCGGCGTG	0		0	0	0	0	0
10924	4693	an	AN0709.1	70.m15316	AO070343000497	1	-340	-281					ATGACACCCGATCCCCACTGCTGCCATATCGGCCATACGGAGACCTGCTCATCACCGTGA	ATGACACCCGATCCCCACTGCTGCCATATCGGCCATACGGAGACCTGCTCATCACCGTGA			MTPDPHCCHIGHTETCSSP*	MTPDPHCCHIGHTETCSSP*			TTATTCAACT	CAAAGTCCAG	0	R	0	0	0	0	0
10925	4693	an	AN0709.1	70.m15316	AO070343000497	1	-244	-206					ATGCTAGACCCAAACATCTGGTCCCTCGACTCGATTTAA	ATGCTAGACCCAAACATCTGGTCCCTCGACTCGATTTAA			MLDPNIWSLDSI*	MLDPNIWSLDSI*			CCTAATCACT	AACCAGCATC	0	R	0	0	0	0	0
10991	4716	af	AN4540.1	57.m05981	AO070321000158	0			-54	-7			ATGTCTACCATTGAGGCCTATTGCAAGAACAGTAGCTCGTCATATTGA		ATGTCTACCATTGAGGCCTATTGCAAGAACAGTAGCTCGTCATATTGA		MSTIEAYCKNSSSSY*		MSTIEAYCKNSSSSY*		TCATATGTAG	CACAGCATGG	1	ER	0	0	0	0	0
11005	4720	ao	AN1362.1	70.m14867	AO070243000002	1					-102	-64	ATGTCGGGCTCAGCAGCACGCTTCTTCTCGTGCTTGTAG			ATGTCGGGCTCAGCAGCACGCTTCTTCTCGTGCTTGTAG	MSGSAARFFSCL*			MSGSAARFFSCL*	TGCTTTCTGC	ACGATATCTT	0		0	0	0	0	0
11007	4722	af	AN3826.1	58.m07802	AO070305000062	0			-57	-43			ATGGTCAATTATTGA		ATGGTCAATTATTGA		MVNY*		MVNY*		TTAGATAACG	TAATTGCTAT	1	R	FG00694.1	MG01168.1	NCU00924.1	0	0
11008	4722	af	AN3826.1	58.m07802	AO070305000062	0			-34	-8			ATGCTACAATCTTCAATTTTTTGTTGA		ATGCTACAATCTTCAATTTTTTGTTGA		MLQSSIFC*		MLQSSIFC*		GATAATTGCT	ACACATTATG	1	R	FG00694.1	MG01168.1	NCU00924.1	0	0
11011	4722	ao	AN3826.1	58.m07802	AO070305000062	0					-34	-8	ATGTACAGCACTAGGAATATTTCCTGA			ATGTACAGCACTAGGAATATTTCCTGA	MYSTRNIS*			MYSTRNIS*	CCGTTCGGCT	TAGTGTCATG	1	R	FG00694.1	MG01168.1	NCU00924.1	0	0
11014	4728	an	AN1795.1	72.m19547	AO070309000136	1	-134	-90					ATGTATCCTTTGTATCGCCTCCACAGCCATCAATCTCCTTTTTAA	ATGTATCCTTTGTATCGCCTCCACAGCCATCAATCTCCTTTTTAA			MYPLYRLHSHQSPF*	MYPLYRLHSHQSPF*			TTCTCTCCTC	TACCTAACTG	0	P	0	0	0	0	0
11015	4728	af	AN1795.1	72.m19547	AO070309000136	1			-119	-6			ATGGTGTGTTTGGTATCTGCCACACCTGGGTCGGCCCCGTCACACTTATTCAATCAGCATCATCTATCTCTCTCTACCGATAATCGCGCCACTGTGCGCGTCGCAAGGCTATAG		ATGGTGTGTTTGGTATCTGCCACACCTGGGTCGGCCCCGTCACACTTATTCAATCAGCATCATCTATCTCTCTCTACCGATAATCGCGCCACTGTGCGCGTCGCAAGGCTATAG		MVCLVSATPGSAPSHLFNQHHLSLSTDNRATVRVARL*		MVCLVSATPGSAPSHLFNQHHLSLSTDNRATVRVARL*		TCCTCGTCCG	CAATCATGGG	0	P	0	0	0	0	0
11041	4738	af	AN0888.1	70.m15494	AO070320000057	0			-29	-18			ATGACTCTCTAA		ATGACTCTCTAA		MTL*		MTL*		CTCTGACTTC	TCCTTCCTTG	1	BT	0	0	0	0	0
11079	4749	af	AN6114.1	72.m19045	AO070340000090	1			-61	-41			ATGCAGCGAGTGATCGCCTAA		ATGCAGCGAGTGATCGCCTAA		MQRVIA*		MQRVIA*		ATCACCCTCA	TTGTCAGATA	0	L	FG01896.1	0	NCU01321.1	0	0
11097	4755	af	AN1871.1	57.m05746	AO070341000188	0			-30	-16			ATGTTCACGCCGTAG		ATGTTCACGCCGTAG		MFTP*		MFTP*		TTCTCATTGA	CGATATCCAT	1		0	0	0	0	0
11127	4765	af	AN3802.1	57.m05972	AO070337000226	0			-45	-28			ATGCAGCTGGTCAACTGA		ATGCAGCTGGTCAACTGA		MQLVN*		MQLVN*		GCAAGAACAG	CTGTGACGGC	1		0	0	0	0	0
11129	4766	af	AN5205.1	69.m14902	AO070199000004	0			-55	-44			ATGTCTCTCTGA		ATGTCTCTCTGA		MSL*		MSL*		GGGCTGGTCT	TATCGGGTCT	1	RP	0	0	0	0	0
11140	4768	af	AN1045.1	70.m15201	AO070336000078	1			-124	-92			ATGTCGAGAATTTTTCGTTGTATGCTGACCTAG		ATGTCGAGAATTTTTCGTTGTATGCTGACCTAG		MSRIFRCMLT*		MSRIFRCMLT*		TTTAAATCGG	TCTGATCGAG	0	R	0	0	0	0	0
11141	4768	af	AN1045.1	70.m15201	AO070336000078	1			-103	-92			ATGCTGACCTAG		ATGCTGACCTAG		MLT*		MLT*		TTTTCGTTGT	TCTGATCGAG	0	R	0	0	0	0	0
11160	4782	af	AN8400.1	59.m09197	AO070329000063	0			-60	-43			ATGAGTATGGTCGCATAG		ATGAGTATGGTCGCATAG		MSMVA*		MSMVA*		TCACTTGCTG	AACAAGATCA	1	GEPR	0	0	0	0	0
11161	4782	af	AN8400.1	59.m09197	AO070329000063	0			-54	-43			ATGGTCGCATAG		ATGGTCGCATAG		MVA*		MVA*		GCTGATGAGT	AACAAGATCA	1	GEPR	0	0	0	0	0
11164	4782	ao	AN8400.1	59.m09197	AO070329000063	0					-30	-7	ATGTGCCACTATACAATACGCTGA			ATGTGCCACTATACAATACGCTGA	MCHYTIR*			MCHYTIR*	CTACTTCGTT	GTAGCAATGG	1	GEPR	0	0	0	0	0
11170	4791	af	AN5881.1	72.m19250	AO070245000027	0			-48	-31			ATGCAACGTCCCTGGTAG		ATGCAACGTCCCTGGTAG		MQRPW*		MQRPW*		GTGAAGGGTA	CGATCAAAAT	1		0	0	0	0	0
11184	4793	an	AN5970.1	72.m19186	AO070340000328	1	-98	-84					ATGTGCCACCTTTAA	ATGTGCCACCTTTAA			MCHL*	MCHL*			TTGTTCCCCC	ATAAATCCGA	0	O	0	0	0	0	0
11185	4793	af	AN5970.1	72.m19186	AO070340000328	1			-129	-19			ATGTGGAGTTTGGACCAATGTGCCTATTGTGAAATCTACTTCAGCCCCTTCTTCTTTAACAATTCTCGACTTTCGTTTTCAGTCTTAACCTGTTGCTTTCCGGGTCTTTGA		ATGTGGAGTTTGGACCAATGTGCCTATTGTGAAATCTACTTCAGCCCCTTCTTCTTTAACAATTCTCGACTTTCGTTTTCAGTCTTAACCTGTTGCTTTCCGGGTCTTTGA		MWSLDQCAYCEIYFSPFFFNNSRLSFSVLTCCFPGL*		MWSLDQCAYCEIYFSPFFFNNSRLSFSVLTCCFPGL*		GGTTCGATAA	CCTTGAACGC	0	O	0	0	0	0	0
11186	4793	af	AN5970.1	72.m19186	AO070340000328	1			-112	-98			ATGTGCCTATTGTGA		ATGTGCCTATTGTGA		MCLL*		MCLL*		GTTTGGACCA	AATCTACTTC	0	O	0	0	0	0	0
11187	4793	ao	AN5970.1	72.m19186	AO070340000328	1					-100	-86	ATGTGCCACCCGTAA			ATGTGCCACCCGTAA	MCHP*			MCHP*	CTAGGTCTTC	TTTCTTTGGC	0	O	0	0	0	0	0
11188	4794	af	AN1532.1	55.m03049	AO070334000248	1			-68	-24			ATGTTGGTGCCTCTCCTGCCCGAGCGATTGATCGCTGGCGGCTAA		ATGTTGGTGCCTCTCCTGCCCGAGCGATTGATCGCTGGCGGCTAA		MLVPLLPERLIAGG*		MLVPLLPERLIAGG*		TCTTGCTTTG	TTCTGATAGC	0		0	0	0	0	0
11189	4794	ao	AN1532.1	55.m03049	AO070334000248	1					-143	-21	ATGAAGTTCTTTTCATATCACTTTTCTTGCATTGTAATCAACTCTTATTGTACCGTGTCGCTGTCCTTGCTCTATTGCTTGCATACTTCAAGTGGTTTATCTCACCCATTATCTAACGCTTAA			ATGAAGTTCTTTTCATATCACTTTTCTTGCATTGTAATCAACTCTTATTGTACCGTGTCGCTGTCCTTGCTCTATTGCTTGCATACTTCAAGTGGTTTATCTCACCCATTATCTAACGCTTAA	MKFFSYHFSCIVINSYCTVSLSLLYCLHTSSGLSHPLSNA*			MKFFSYHFSCIVINSYCTVSLSLLYCLHTSSGLSHPLSNA*	TCGGACGTGG	GAAGGTATAA	0		0	0	0	0	0
11219	4820	af	AN4209.1	54.m07042	AO070231000015	0			-40	-8			ATGTCCTTCTGGTTCATAACTACCTCCCAATAG		ATGTCCTTCTGGTTCATAACTACCTCCCAATAG		MSFWFITTSQ*		MSFWFITTSQ*		CGCAGTACAT	GTGCAAGATG	1	R	FG05384.1	0	0	0	0
11235	4831	an	AN5517.1	69.m15442	AO070341000376	1	-304	-290					ATGATCATGTTCTAA	ATGATCATGTTCTAA			MIMF*	MIMF*			CACCACTGTG	CGATTACTGT	0	R	0	0	0	0	0
11236	4831	an	AN5517.1	69.m15442	AO070341000376	1	-227	-189					ATGCTGACAAGCCCCCATTTTGCCTGCTCCCAAGACTAG	ATGCTGACAAGCCCCCATTTTGCCTGCTCCCAAGACTAG			MLTSPHFACSQD*	MLTSPHFACSQD*			ACCGAGTATC	ACACTTCCTC	0	R	0	0	0	0	0
11237	4831	an	AN5517.1	69.m15442	AO070341000376	1	-141	-31					ATGATACTCAAAAGTACGCGTGACGTATATCGACTTTTGAACAGAGACGACGATAACGGTCCAGTTTCCACCGCCTCGAAGACGCGTCTCTGTGCTAGCATATCCCGATAA	ATGATACTCAAAAGTACGCGTGACGTATATCGACTTTTGAACAGAGACGACGATAACGGTCCAGTTTCCACCGCCTCGAAGACGCGTCTCTGTGCTAGCATATCCCGATAA			MILKSTRDVYRLLNRDDDNGPVSTASKTRLCASISR*	MILKSTRDVYRLLNRDDDNGPVSTASKTRLCASISR*			TTCTTCTCGC	CGCAGCCGAA	0	R	0	0	0	0	0
11238	4831	af	AN5517.1	69.m15442	AO070341000376	1			-329	-312			ATGACAATCATGTTCTGA		ATGACAATCATGTTCTGA		MTIMF*		MTIMF*		GAACTCTCTT	ATTATTCTCT	0	R	0	0	0	0	0
11239	4831	ao	AN5517.1	69.m15442	AO070341000376	1					-320	-306	ATGGCCGTGCTTTAA			ATGGCCGTGCTTTAA	MAVL*			MAVL*	CGCCGTCCTT	TCACCGCTTT	0	R	0	0	0	0	0
11240	4831	ao	AN5517.1	69.m15442	AO070341000376	1					-276	-244	ATGGTTCTTACAGGCGTGTATGTACCGTGCTGA			ATGGTTCTTACAGGCGTGTATGTACCGTGCTGA	MVLTGVYVPC*			MVLTGVYVPC*	CGGCACTTAG	CCGCCCTCGA	0	R	0	0	0	0	0
11241	4831	ao	AN5517.1	69.m15442	AO070341000376	1					-257	-210	ATGTACCGTGCTGACCGCCCTCGATATACCGGATCGTTTCCCTGTTGA			ATGTACCGTGCTGACCGCCCTCGATATACCGGATCGTTTCCCTGTTGA	MYRADRPRYTGSFPC*			MYRADRPRYTGSFPC*	ACAGGCGTGT	GCATCGCCGG	0	R	0	0	0	0	0
11242	4831	ao	AN5517.1	69.m15442	AO070341000376	1					-125	-114	ATGTCCCTATAA			ATGTCCCTATAA	MSL*			MSL*	TAGTATCTTG	CCGCCGACGT	0	R	0	0	0	0	0
11247	4839	an	AN4528.1	57.m05598	AO070321000138	1	-431	-390					ATGTCACTGACGCCCGGTAGCGTCCTATCAATCTCAATCTAG	ATGTCACTGACGCCCGGTAGCGTCCTATCAATCTCAATCTAG			MSLTPGSVLSISI*	MSLTPGSVLSISI*			GTCTTGTGCA	CTTTCAGCGT	0	U	0	0	0	0	0
11248	4839	af	AN4528.1	57.m05598	AO070321000138	1			-369	-340			ATGCACTATCAGCATTTGATTCTTTTTTAA		ATGCACTATCAGCATTTGATTCTTTTTTAA		MHYQHLILF*		MHYQHLILF*		ATCAGTCACC	GTGATTATCT	0	U	0	0	0	0	0
11249	4839	ao	AN4528.1	57.m05598	AO070321000138	1					-684	-670	ATGACACATCTGTAG			ATGACACATCTGTAG	MTHL*			MTHL*	ACCGAGATAC	GACAGAATCT	0	U	0	0	0	0	0
11250	4839	ao	AN4528.1	57.m05598	AO070321000138	1					-418	-392	ATGGCTATTGCTTGGATGGTGTCGTGA			ATGGCTATTGCTTGGATGGTGTCGTGA	MAIAWMVS*			MAIAWMVS*	AACTGTCTTG	TTCGTGAACA	0	U	0	0	0	0	0
11251	4839	ao	AN4528.1	57.m05598	AO070321000138	1					-403	-392	ATGGTGTCGTGA			ATGGTGTCGTGA	MVS*			MVS*	TATTGCTTGG	TTCGTGAACA	0	U	0	0	0	0	0
11261	4845	ao	AN1830.1	52.m03901	AO070292000077	0					-56	-3	ATGTTTCTCCGCGGTAAACACGTAAGTCACGACTTGAATAAGGACCAGCGGTAA			ATGTTTCTCCGCGGTAAACACGTAAGTCACGACTTGAATAAGGACCAGCGGTAA	MFLRGKHVSHDLNKDQR*			MFLRGKHVSHDLNKDQR*	ATGAACTTGG	CAATGACATT	1	R	0	0	0	0	0
11263	4849	an	AN0671.1	70.m15273	AO070343000549	1	-220	-185					ATGCTCTCATATCATCTCGACCTGAGTCTTTCCTGA	ATGCTCTCATATCATCTCGACCTGAGTCTTTCCTGA			MLSYHLDLSLS*	MLSYHLDLSLS*			TCTTATTTTA	TCTTGCTCGT	0		0	0	0	0	0
11264	4849	an	AN0671.1	70.m15273	AO070343000549	1	-135	-112					ATGCCGCTAAGCTTCTTCCGCTGA	ATGCCGCTAAGCTTCTTCCGCTGA			MPLSFFR*	MPLSFFR*			AAGCTCCCCA	TCAAGGAGAT	0		0	0	0	0	0
11265	4849	af	AN0671.1	70.m15273	AO070343000549	1			-334	-260			ATGGGCTCGAATCCTGAACGACTGTGGGAATTATGCGACCTCCATGTCAAACAGCATCTGGCTCAACAACAGTAG		ATGGGCTCGAATCCTGAACGACTGTGGGAATTATGCGACCTCCATGTCAAACAGCATCTGGCTCAACAACAGTAG		MGSNPERLWELCDLHVKQHLAQQQ*		MGSNPERLWELCDLHVKQHLAQQQ*		CTCTGAAGGA	AAGCAGCAGC	0		0	0	0	0	0
11266	4849	af	AN0671.1	70.m15273	AO070343000549	1			-302	-204			ATGCGACCTCCATGTCAAACAGCATCTGGCTCAACAACAGTAGAAGCAGCAGCAACGCCGAAGGAAGAGGAGGAGGACGACGATCCTGAATCGAGCTGA		ATGCGACCTCCATGTCAAACAGCATCTGGCTCAACAACAGTAGAAGCAGCAGCAACGCCGAAGGAAGAGGAGGAGGACGACGATCCTGAATCGAGCTGA		MRPPCQTASGSTTVEAAATPKEEEEDDDPESS*		MRPPCQTASGSTTVEAAATPKEEEEDDDPESS*		TGTGGGAATT	GGTAGAAAAA	0		0	0	0	0	0
11267	4849	af	AN0671.1	70.m15273	AO070343000549	1			-291	-214			ATGTCAAACAGCATCTGGCTCAACAACAGTAGAAGCAGCAGCAACGCCGAAGGAAGAGGAGGAGGACGACGATCCTGA		ATGTCAAACAGCATCTGGCTCAACAACAGTAGAAGCAGCAGCAACGCCGAAGGAAGAGGAGGAGGACGACGATCCTGA		MSNSIWLNNSRSSSNAEGRGGGRRS*		MSNSIWLNNSRSSSNAEGRGGGRRS*		TGCGACCTCC	ATCGAGCTGA	0		0	0	0	0	0
11268	4849	af	AN0671.1	70.m15273	AO070343000549	1			-152	-126			ATGTCGAGTCTTCCGTATTCCCACTGA		ATGTCGAGTCTTCCGTATTCCCACTGA		MSSLPYSH*		MSSLPYSH*		TCCATTCCAA	CACAATTCCC	0		0	0	0	0	0
11269	4849	af	AN0671.1	70.m15273	AO070343000549	1			-38	-18			ATGGCCGTTGGCGTCAGCTAG		ATGGCCGTTGGCGTCAGCTAG		MAVGVS*		MAVGVS*		GCCGCTTTGA	ACGCGCCAGT	1		0	0	0	0	0
11270	4849	ao	AN0671.1	70.m15273	AO070343000549	1					-191	-108	ATGTCGAAACGTCGTCGGCTGAAAAAGTATCGTTCTTCTTCTCTCACACCACATCATTCTTTTCGTTTACGACATCGATGCTGA			ATGTCGAAACGTCGTCGGCTGAAAAAGTATCGTTCTTCTTCTCTCACACCACATCATTCTTTTCGTTTACGACATCGATGCTGA	MSKRRRLKKYRSSSLTPHHSFRLRHRC*			MSKRRRLKKYRSSSLTPHHSFRLRHRC*	ACTCGTAGTC	TCCTCTTGAG	0		0	0	0	0	0
11271	4849	ao	AN0671.1	70.m15273	AO070343000549	1					-114	-58	ATGCTGATCCTCTTGAGTTCCTGCAGACCCAGGTATTATCCTGGAAGACACCTTTAA			ATGCTGATCCTCTTGAGTTCCTGCAGACCCAGGTATTATCCTGGAAGACACCTTTAA	MLILLSSCRPRYYPGRHL*			MLILLSSCRPRYYPGRHL*	TACGACATCG	ATTTTGCGGC	0		0	0	0	0	0
11272	4849	ao	AN0671.1	70.m15273	AO070343000549	1					-39	-22	ATGGCCGTTACGTTTTGA			ATGGCCGTTACGTTTTGA	MAVTF*			MAVTF*	GCCGTCTTGA	TAACAAATTG	1		0	0	0	0	0
11288	4855	ao	AN0326.1	54.m06429	AO070318000002	1					-223	-200	ATGAGGTGCCACCAGACTTGGTGA			ATGAGGTGCCACCAGACTTGGTGA	MRCHQTW*			MRCHQTW*	CTCACTGTAA	AATAAGCACG	0	Z	0	0	0	0	0
11295	4860	an	AN6241.1	72.m19416	AO070304000092	1	-36	-22					ATGGTTCTGAAATAA	ATGGTTCTGAAATAA			MVLK*	MVLK*			TCCTCGTCGG	AGCGTGAACC	1	T	0	0	0	0	0
11307	4865	an	AN2109.1	57.m05963	AO070341000274	1	-176	-159					ATGGGAGCGTTCGTCTGA	ATGGGAGCGTTCGTCTGA			MGAFV*	MGAFV*			TTCAGACTCC	AGGTCTGTGC	0	DO	0	0	0	0	0
11309	4867	an	AN5980.1	72.m19163	AO070340000300	0	-21	-4					ATGACCAAAAAATTTTGA	ATGACCAAAAAATTTTGA			MTKKF*	MTKKF*			CTCTCCATAT	ATCATGTCTT	1		0	0	0	0	0
11312	4867	ao	AN5980.1	72.m19163	AO070340000300	0					-53	-18	ATGCCCAACCACTTTTCTCACCCTCTACACCATTGA			ATGCCCAACCACTTTTCTCACCCTCTACACCATTGA	MPNHFSHPLHH*			MPNHFSHPLHH*	ACCGTCTTCA	CAGAATTACC	1		0	0	0	0	0
11327	4872	af	AN5346.1	69.m15558	AO070333000176	0			-42	-28			ATGATCGCACGTTAG		ATGATCGCACGTTAG		MIAR*		MIAR*		TTACAACACA	ACTAGATTTC	1	O	0	MG10494.1	0	0	0
11331	4872	ao	AN5346.1	69.m15558	AO070333000176	0					-50	-36	ATGATTGATATCTAA			ATGATTGATATCTAA	MIDI*			MIDI*	TTTGCGCATT	ACTATCTAAT	1	O	0	MG10494.1	0	0	0
11346	4876	af	AN5400.1	69.m15773	AO070333000134	0			-32	-15			ATGGTCAGTGAAAAGTGA		ATGGTCAGTGAAAAGTGA		MVSEK*		MVSEK*		GTTCCCGATC	CAACTACCAG	1	P	0	0	0	0	0
11351	4878	ao	AN0564.1	69.m15283	AO070272000041	0					-57	-43	ATGTATTCTTGTTAA			ATGTATTCTTGTTAA	MYSC*			MYSC*	CCCTTTCACT	GTCCAGCAAT	1	R	0	0	0	0	0
11352	4879	an	AN6305.1	72.m19329	AO070308000060	0	-52	-11					ATGCTTCCAGTTTGTCTTACATCGACCGTTGTCTCATCTTAA	ATGCTTCCAGTTTGTCTTACATCGACCGTTGTCTCATCTTAA			MLPVCLTSTVVSS*	MLPVCLTSTVVSS*			CTAGCGCTGC	ACCGTCCTCG	1	T	0	0	0	0	0
11353	4879	af	AN6305.1	72.m19329	AO070308000060	0			-57	-31			ATGGTCCATGTTTCACCTTATCTCTGA		ATGGTCCATGTTTCACCTTATCTCTGA		MVHVSPYL*		MVHVSPYL*		CACCAATCCT	CCTCTTATAC	1	T	0	0	0	0	0
11354	4879	af	AN6305.1	72.m19329	AO070308000060	0			-50	-15			ATGTTTCACCTTATCTCTGACCTCTTATACTTTTAA		ATGTTTCACCTTATCTCTGACCTCTTATACTTTTAA		MFHLISDLLYF*		MFHLISDLLYF*		CCTATGGTCC	CTCTCGTTTC	1	T	0	0	0	0	0
11371	4884	af	AN1981.1	58.m08945	AO070301000066	0			-25	-14			ATGCTGATGTGA		ATGCTGATGTGA		MLM*		MLM*		CGACCTGCAT	CTATTACTTC	1	O	0	0	0	YJL031C	0
11374	4885	an	AN6208.1	72.m19306	AO070308000085	1	-84	-49					ATGGACAAGGATTACACGCCTTCAACTCACAAATGA	ATGGACAAGGATTACACGCCTTCAACTCACAAATGA			MDKDYTPSTHK*	MDKDYTPSTHK*			CAGGCAGCCT	GCTTTCGCTT	0		0	0	0	0	0
11375	4885	ao	AN6208.1	72.m19306	AO070308000085	1					-90	-76	ATGCATCATTTCTAA			ATGCATCATTTCTAA	MHHF*			MHHF*	TCCTGAACAG	GCTTGCATCG	0		0	0	0	0	0
11388	4890	an	AN8696.1	62.m03488	AO070315000121	0	-47	-36					ATGCAAAATTAG	ATGCAAAATTAG			MQN*	MQN*			CTATCATAAG	CAACGGTGGT	1	S	0	0	0	0	0
11395	4892	ao	AN4781.1	59.m09202	AO070329000069	0					-45	-34	ATGCGCCACTAA			ATGCGCCACTAA	MRH*			MRH*	CAGCCAGACA	TCAGATATAT	1	CH	0	0	0	0	0
11396	4893	af	AN1544.1	55.m03062	AO070339000310	0			-41	-3			ATGTGCACGGAGTGTCGTACAGATAATCCCCGCTATTGA		ATGTGCACGGAGTGTCGTACAGATAATCCCCGCTATTGA		MCTECRTDNPRY*		MCTECRTDNPRY*		AACCCCTTGA	CCATGTCCGA	1		0	0	0	0	0
11444	4911	an	AN5103.1	54.m06964	AO070291000076	1	-87	-40					ATGTTTCTACCTAAGGCCAATGTTGAGCGCTCCAAATCATCTTATTGA	ATGTTTCTACCTAAGGCCAATGTTGAGCGCTCCAAATCATCTTATTGA			MFLPKANVERSKSSY*	MFLPKANVERSKSSY*			GGTCACTACA	ACTTCAGCGT	0	C	0	0	0	0	0
11447	4911	af	AN5103.1	54.m06964	AO070291000076	1			-176	-129			ATGTTTTTAAACTTGTTTTGTCCTTCATGTCGATTCTTTTCTCCATAA		ATGTTTTTAAACTTGTTTTGTCCTTCATGTCGATTCTTTTCTCCATAA		MFLNLFCPSCRFFSP*		MFLNLFCPSCRFFSP*		TGATATCTCA	TCTGTACTCT	0	C	0	0	0	0	0
11448	4911	af	AN5103.1	54.m06964	AO070291000076	1			-150	-115			ATGTCGATTCTTTTCTCCATAATCTGTACTCTATAG		ATGTCGATTCTTTTCTCCATAATCTGTACTCTATAG		MSILFSIICTL*		MSILFSIICTL*		TTTGTCCTTC	GCGAGCATTG	0	C	0	0	0	0	0
11449	4911	af	AN5103.1	54.m06964	AO070291000076	1			-83	-48			ATGGTATCATCCTCCCCGCGAATATTTGTGATCTGA		ATGGTATCATCCTCCCCGCGAATATTTGTGATCTGA		MVSSSPRIFVI*		MVSSSPRIFVI*		AGATACCCAA	ATGCATATAC	0	C	0	0	0	0	0
11450	4911	af	AN5103.1	54.m06964	AO070291000076	1			-47	-12			ATGCATATACGTCCCGATGGAGAAGGGTGCGCTTAG		ATGCATATACGTCCCGATGGAGAAGGGTGCGCTTAG		MHIRPDGEGCA*		MHIRPDGEGCA*		TGTGATCTGA	ATATCCGCAT	1	C	0	0	0	0	0
11478	4924	af	AN3814.1	57.m05668	AO070311000012	1			-598	-509			ATGGATGGACATCCGACTGACTCCGAGGAATCTCCCTTTCTTTCTCCCTTGTTCCTGAATCATTGTGCCGTCCAGGTTATCATTATATAA		ATGGATGGACATCCGACTGACTCCGAGGAATCTCCCTTTCTTTCTCCCTTGTTCCTGAATCATTGTGCCGTCCAGGTTATCATTATATAA		MDGHPTDSEESPFLSPLFLNHCAVQVIII*		MDGHPTDSEESPFLSPLFLNHCAVQVIII*		CACGTGATTT	TCAAAAATTT	0	O	0	0	0	0	0
11479	4924	af	AN3814.1	57.m05668	AO070311000012	1			-594	-541			ATGGACATCCGACTGACTCCGAGGAATCTCCCTTTCTTTCTCCCTTGTTCCTGA		ATGGACATCCGACTGACTCCGAGGAATCTCCCTTTCTTTCTCCCTTGTTCCTGA		MDIRLTPRNLPFFLPCS*		MDIRLTPRNLPFFLPCS*		TGATTTATGG	ATCATTGTGC	0	O	0	0	0	0	0
11495	4925	ao	AN0454.1	54.m06615	AO070328000182	1					-63	-43	ATGTTCACAATCATTTTGTAA			ATGTTCACAATCATTTTGTAA	MFTIIL*			MFTIIL*	TCTTCTTTCG	TCTGTGGTGA	0	E	0	0	0	0	0

## Sheet: extended_data_300bp
uORF_id	ortholog_cluster_id	species	an_gene	af_gene	ao_gene	in_utr	an_rel_start	an_rel_stop	af_rel_start	af_rel_stop	ao_rel_start	ao_rel_stop	consensus_dna	an_dna	af_dna	ao_dna	consensus_aa	an_aa	af_aa	ao_aa	context_up_consensus	context_down_consensus	within 60bp	COG category	fg_uorf_utr	mg_uorf_utr	nc_uorf_utr	sc_uorf_100bp	sc_cooccur_orf_100bp
1	2	af	AN5593.1	58.m07517	AO070328000010	0			-199	-137			ATGATCCCCTGTTCTGATCAATTATCATATTCTCTGACTGCACGAACAACGAAAACGTCCTAG		ATGATCCCCTGTTCTGATCAATTATCATATTCTCTGACTGCACGAACAACGAAAACGTCCTAG		MIPCSDQLSYSLTARTTKTS*		MIPCSDQLSYSLTARTTKTS*		CTTGATTGGC	CTCTGTCTAT	0	S	0	0	0	0	0
2	2	af	AN5593.1	58.m07517	AO070328000010	0			-89	-48			ATGCCAACCAAGCTCATACTGGACGACGAAGATTCGTTATAG		ATGCCAACCAAGCTCATACTGGACGACGAAGATTCGTTATAG		MPTKLILDDEDSL*		MPTKLILDDEDSL*		TCCTAACCCA	GGACAATAAT	0	S	0	0	0	0	0
3	2	ao	AN5593.1	58.m07517	AO070328000010	0					-240	-199	ATGCTAAGTTTCGATATAAGTCTCGTTCATGCTTGCACTTGA			ATGCTAAGTTTCGATATAAGTCTCGTTCATGCTTGCACTTGA	MLSFDISLVHACT*			MLSFDISLVHACT*	AGGCCCTTCA	AAGCGTGACG	0	S	0	0	0	0	0
4	2	ao	AN5593.1	58.m07517	AO070328000010	0					-212	-132	ATGCTTGCACTTGAAAGCGTGACGCGGTCGACTTACAGGGACACAAGCAGTCCAATATCCGCCTGTTTTGCTGCCAAGTAA			ATGCTTGCACTTGAAAGCGTGACGCGGTCGACTTACAGGGACACAAGCAGTCCAATATCCGCCTGTTTTGCTGCCAAGTAA	MLALESVTRSTYRDTSSPISACFAAK*			MLALESVTRSTYRDTSSPISACFAAK*	AGTCTCGTTC	GAAGACAAAC	0	S	0	0	0	0	0
8	4	af	AN0877.1	70.m15480	AO070320000036	0			-196	-119			ATGGAGTTTTCTCTTCTGCTGGTGCTCCGTCCCATCGATTATCCTCATCTGTGTCGCCGGAATCTACGGAAATCCTAG		ATGGAGTTTTCTCTTCTGCTGGTGCTCCGTCCCATCGATTATCCTCATCTGTGTCGCCGGAATCTACGGAAATCCTAG		MEFSLLLVLRPIDYPHLCRRNLRKS*		MEFSLLLVLRPIDYPHLCRRNLRKS*		AACAACGTCC	CGCCCCTCGC	0		0	0	0	0	0
6	4	an	AN0877.1	70.m15480	AO070320000036	0	-184	-62					ATGGACTTTTCGCCTGGACAAGTTCTGCCATCAAGACACTTCCCGCGCTACGTATACCTTCGACCGCTGGTCCCTTCTGTCGCGATACCAGAAGCGCATCACCGCCGAAGCTTGATTGCTTAG	ATGGACTTTTCGCCTGGACAAGTTCTGCCATCAAGACACTTCCCGCGCTACGTATACCTTCGACCGCTGGTCCCTTCTGTCGCGATACCAGAAGCGCATCACCGCCGAAGCTTGATTGCTTAG			MDFSPGQVLPSRHFPRYVYLRPLVPSVAIPEAHHRRSLIA*	MDFSPGQVLPSRHFPRYVYLRPLVPSVAIPEAHHRRSLIA*			AGTCACGCCC	ACCTGTTTGA	0		0	0	0	0	0
9	4	ao	AN0877.1	70.m15480	AO070320000036	0					-183	-58	ATGGATTTTTCTCTTTACCTAGTGCTTTTTCCGAAAGATATTCCGTATCGCCGCTTTTCCCGTCTATTGTCTTCTTCTTTTGCGACTCCCCCGGACACCGTTACCGGTGACGTTCGATTGCTATAG			ATGGATTTTTCTCTTTACCTAGTGCTTTTTCCGAAAGATATTCCGTATCGCCGCTTTTCCCGTCTATTGTCTTCTTCTTTTGCGACTCCCCCGGACACCGTTACCGGTGACGTTCGATTGCTATAG	MDFSLYLVLFPKDIPYRRFSRLLSSSFATPPDTVTGDVRLL*			MDFSLYLVLFPKDIPYRRFSRLLSSSFATPPDTVTGDVRLL*	CCCATTGTCC	AGCGAGGAAG	0		0	0	0	0	0
10	9	an	AN3785.1	57.m05971	AO070337000246	0	-218	-174					ATGTGGCTCCCCCTCTCGCGACCCCCGTCCCTCGTCGGCCCCTGA	ATGTGGCTCCCCCTCTCGCGACCCCCGTCCCTCGTCGGCCCCTGA			MWLPLSRPPSLVGP*	MWLPLSRPPSLVGP*			GTTGCTTTTG	TATCCGCATC	0	BL	0	0	0	0	0
16	13	af	AN2751.1	71.m15497	AO070323000056	0			-218	-192			ATGAAGGAATCTCTCCGCATTGTATGA		ATGAAGGAATCTCTCCGCATTGTATGA		MKESLRIV*		MKESLRIV*		TTTCGTTTGC	AATGTGTCCT	0	S	0	0	0	0	0
17	13	af	AN2751.1	71.m15497	AO070323000056	0			-195	-142			ATGAAATGTGTCCTGTGGCGGTGTGCTGTGACGACTGTCTGCCTCAGGCAGTAA		ATGAAATGTGTCCTGTGGCGGTGTGCTGTGACGACTGTCTGCCTCAGGCAGTAA		MKCVLWRCAVTTVCLRQ*		MKCVLWRCAVTTVCLRQ*		TCCGCATTGT	TTCCACTAAC	0	S	0	0	0	0	0
18	13	af	AN2751.1	71.m15497	AO070323000056	0			-63	-52			ATGCCGTGGTAG		ATGCCGTGGTAG		MPW*		MPW*		CACTACGAGA	ATCTTGCCAT	0	S	0	0	0	0	0
11	13	an	AN2751.1	71.m15497	AO070323000056	0	-232	-209					ATGTCATCGGGCTCCTATTTGTGA	ATGTCATCGGGCTCCTATTTGTGA			MSSGSYL*	MSSGSYL*			ACCATGCCCA	CCTAGATCAG	0	S	0	0	0	0	0
12	13	an	AN2751.1	71.m15497	AO070323000056	0	-151	-140					ATGCTGGGGTGA	ATGCTGGGGTGA			MLG*	MLG*			GGTCTTTTCA	ATGAGCGACA	0	S	0	0	0	0	0
13	13	an	AN2751.1	71.m15497	AO070323000056	0	-139	-110					ATGAGCGACAAATGGTGCCTTAGGCTGTAA	ATGAGCGACAAATGGTGCCTTAGGCTGTAA			MSDKWCLRL*	MSDKWCLRL*			GCTGGGGTGA	GGCAGAAAAC	0	S	0	0	0	0	0
14	13	an	AN2751.1	71.m15497	AO070323000056	0	-128	-117					ATGGTGCCTTAG	ATGGTGCCTTAG			MVP*	MVP*			TGAGCGACAA	GCTGTAAGGC	0	S	0	0	0	0	0
15	13	an	AN2751.1	71.m15497	AO070323000056	0	-89	-57					ATGATCCCGCACCACAATTATGATGAGTGCTAA	ATGATCCCGCACCACAATTATGATGAGTGCTAA			MIPHHNYDEC*	MIPHHNYDEC*			GTGACCCGTC	ATCTCCCGAG	0	S	0	0	0	0	0
19	13	ao	AN2751.1	71.m15497	AO070323000056	0					-159	-100	ATGTGTTGCCTTAGGCATCAATACCTCTCCGGCACTAACCTGGAGTCGGTAAGCGGGTGA			ATGTGTTGCCTTAGGCATCAATACCTCTCCGGCACTAACCTGGAGTCGGTAAGCGGGTGA	MCCLRHQYLSGTNLESVSG*			MCCLRHQYLSGTNLESVSG*	AACCGGTATA	TATCAGACCG	0	S	0	0	0	0	0
20	13	ao	AN2751.1	71.m15497	AO070323000056	0					-61	-50	ATGCGGCGGTAA			ATGCGGCGGTAA	MRR*			MRR*	CACTACATTT	ATCTCGCTCC	0	S	0	0	0	0	0
21	14	ao	AN0228.1	71.m15484	AO070323000081	0					-238	-197	ATGTCTTTTCCGACGCGTTCGCGTCGCCAACGCGTTTCTTGA			ATGTCTTTTCCGACGCGTTCGCGTCGCCAACGCGTTTCTTGA	MSFPTRSRRQRVS*			MSFPTRSRRQRVS*	GAACCGCGAT	AAAAGAAAGT	0	L	0	0	0	0	0
25	26	an	AN8236.1	53.m04127	AO070310000072	0	-219	-175					ATGTCCTTTTGTCCACTTCCATTTGAGGCTACATCCACTCATTGA	ATGTCCTTTTGTCCACTTCCATTTGAGGCTACATCCACTCATTGA			MSFCPLPFEATSTH*	MSFCPLPFEATSTH*			GGATCGGCCC	ATGTTTCTTA	0	T	0	0	0	0	0
26	26	an	AN8236.1	53.m04127	AO070310000072	0	-174	-121					ATGTTTCTTAATGACTTCAAGGATTGTCTGGTTTTGATTGATTGGGTTATTTGA	ATGTTTCTTAATGACTTCAAGGATTGTCTGGTTTTGATTGATTGGGTTATTTGA			MFLNDFKDCLVLIDWVI*	MFLNDFKDCLVLIDWVI*			CACTCATTGA	ACTTGGTACC	0	T	0	0	0	0	0
27	26	an	AN8236.1	53.m04127	AO070310000072	0	-164	-138					ATGACTTCAAGGATTGTCTGGTTTTGA	ATGACTTCAAGGATTGTCTGGTTTTGA			MTSRIVWF*	MTSRIVWF*			ATGTTTCTTA	TTGATTGGGT	0	T	0	0	0	0	0
28	26	an	AN8236.1	53.m04127	AO070310000072	0	-93	-52					ATGTACGAGGGTCACGGGCGAGTTCTGATCGTCCCTTCCTGA	ATGTACGAGGGTCACGGGCGAGTTCTGATCGTCCCTTCCTGA			MYEGHGRVLIVPS*	MYEGHGRVLIVPS*			AGCTGTCTTG	ATCGTTGCTT	0	T	0	0	0	0	0
29	26	ao	AN8236.1	53.m04127	AO070310000072	0					-149	-123	ATGTGTGAGAGTAGTTTCCACCCTTGA			ATGTGTGAGAGTAGTTTCCACCCTTGA	MCESSFHP*			MCESSFHP*	GATTTGTTCG	TTTCTAGATT	0	T	0	0	0	0	0
31	36	af	AN8197.1	53.m03776	AO070310000122	0			-207	-160			ATGAGCGGTAAAATGAGTCCTGAGAACGCCCACGTTTGCCCTTTTTAG		ATGAGCGGTAAAATGAGTCCTGAGAACGCCCACGTTTGCCCTTTTTAG		MSGKMSPENAHVCPF*		MSGKMSPENAHVCPF*		GAAAAAGGAC	GGCCTTCAGC	0	R	0	0	0	0	0
32	36	af	AN8197.1	53.m03776	AO070310000122	0			-195	-160			ATGAGTCCTGAGAACGCCCACGTTTGCCCTTTTTAG		ATGAGTCCTGAGAACGCCCACGTTTGCCCTTTTTAG		MSPENAHVCPF*		MSPENAHVCPF*		GAGCGGTAAA	GGCCTTCAGC	0	R	0	0	0	0	0
33	36	af	AN8197.1	53.m03776	AO070310000122	0			-122	-93			ATGAGCAATGTACTGTCAGGTCACGTGTAA		ATGAGCAATGTACTGTCAGGTCACGTGTAA		MSNVLSGHV*		MSNVLSGHV*		TGCGAGAACT	CAGGACAGAT	0	R	0	0	0	0	0
30	36	an	AN8197.1	53.m03776	AO070310000122	0	-145	-128					ATGAACTGCAGCGCATAA	ATGAACTGCAGCGCATAA			MNCSA*	MNCSA*			GTAGTGGAAG	CAAGCTGAGT	0	R	0	0	0	0	0
34	36	ao	AN8197.1	53.m03776	AO070310000122	0					-238	-221	ATGACGCAACGAGGATAA			ATGACGCAACGAGGATAA	MTQRG*			MTQRG*	AAGGAAACAG	CCATGCTCTG	0	R	0	0	0	0	0
35	36	ao	AN8197.1	53.m03776	AO070310000122	0					-199	-143	ATGATGTTATGCATCAAAGTCAATCTGCACAAAGATTTTGATTCCATGTATGATTAA			ATGATGTTATGCATCAAAGTCAATCTGCACAAAGATTTTGATTCCATGTATGATTAA	MMLCIKVNLHKDFDSMYD*			MMLCIKVNLHKDFDSMYD*	CCTGCATTAC	TGTGTAGGAG	0	R	0	0	0	0	0
36	36	ao	AN8197.1	53.m03776	AO070310000122	0					-196	-143	ATGTTATGCATCAAAGTCAATCTGCACAAAGATTTTGATTCCATGTATGATTAA			ATGTTATGCATCAAAGTCAATCTGCACAAAGATTTTGATTCCATGTATGATTAA	MLCIKVNLHKDFDSMYD*			MLCIKVNLHKDFDSMYD*	GCATTACATG	TGTGTAGGAG	0	R	0	0	0	0	0
37	36	ao	AN8197.1	53.m03776	AO070310000122	0					-191	-159	ATGCATCAAAGTCAATCTGCACAAAGATTTTGA			ATGCATCAAAGTCAATCTGCACAAAGATTTTGA	MHQSQSAQRF*			MHQSQSAQRF*	ACATGATGTT	TTCCATGTAT	0	R	0	0	0	0	0
38	36	ao	AN8197.1	53.m03776	AO070310000122	0					-154	-143	ATGTATGATTAA			ATGTATGATTAA	MYD*			MYD*	TTTTGATTCC	TGTGTAGGAG	0	R	0	0	0	0	0
39	36	ao	AN8197.1	53.m03776	AO070310000122	0					-150	-136	ATGATTAATGTGTAG			ATGATTAATGTGTAG	MINV*			MINV*	GATTCCATGT	GAGATGGAAA	0	R	0	0	0	0	0
40	36	ao	AN8197.1	53.m03776	AO070310000122	0					-132	-118	ATGGAAAGGGAATAG			ATGGAAAGGGAATAG	MERE*			MERE*	TGTGTAGGAG	TACGGAAATA	0	R	0	0	0	0	0
41	37	an	AN4988.1	59.m08891	AO070288000057	0	-220	-65					ATGCTAAATCCTCCGAAAGACAAGTTGCGCGACCGCCACCCCGCTTTGGCCCAAAGCTGCCTGCTGCCGGCACCGCAAATCCAATCCCAGCCCCCTCACGCTTTATCAGTGCAGCACCCCAAAGCTCCGTCCTGTTCTTTGCTATATTACTCGTAA	ATGCTAAATCCTCCGAAAGACAAGTTGCGCGACCGCCACCCCGCTTTGGCCCAAAGCTGCCTGCTGCCGGCACCGCAAATCCAATCCCAGCCCCCTCACGCTTTATCAGTGCAGCACCCCAAAGCTCCGTCCTGTTCTTTGCTATATTACTCGTAA			MLNPPKDKLRDRHPALAQSCLLPAPQIQSQPPHALSVQHPKAPSCSLLYYS*	MLNPPKDKLRDRHPALAQSCLLPAPQIQSQPPHALSVQHPKAPSCSLLYYS*			GGCGTTGTCA	TCTTGGACGC	0	G	0	0	0	0	0
42	37	ao	AN4988.1	59.m08891	AO070288000057	0					-254	-144	ATGGATTCCCTAATCTTACTTCCCCGCCCCAGAAAATACTATAAAGAATCTCATCTTTCACGTCAGCATGTCGTTGCATTGGATCCACTAACGTCTTTCCACTCTATCTAA			ATGGATTCCCTAATCTTACTTCCCCGCCCCAGAAAATACTATAAAGAATCTCATCTTTCACGTCAGCATGTCGTTGCATTGGATCCACTAACGTCTTTCCACTCTATCTAA	MDSLILLPRPRKYYKESHLSRQHVVALDPLTSFHSI*			MDSLILLPRPRKYYKESHLSRQHVVALDPLTSFHSI*	TCAGGCTCCC	AGTTTGTCGT	0	G	0	0	0	0	0
43	37	ao	AN4988.1	59.m08891	AO070288000057	0					-187	-164	ATGTCGTTGCATTGGATCCACTAA			ATGTCGTTGCATTGGATCCACTAA	MSLHWIH*			MSLHWIH*	TCACGTCAGC	CGTCTTTCCA	0	G	0	0	0	0	0
44	39	af	AN7526.1	69.m15144	AO070258000030	0			-62	-42			ATGAGTTGGACCAAAACTTAA		ATGAGTTGGACCAAAACTTAA		MSWTKT*		MSWTKT*		TAAAAAAAAA	CAGCAACCAC	0	KU	0	0	0	YDR299W	0
47	46	af	AN2446.1	69.m15213	AO070264000031	0			-198	-46			ATGTGCCTCCGTCCAGTGGTTGATGGTCGAGAGTTGACGGTTCGGTTGCCATGTGCAACGCCCACAATGACATCGCCTTCTCCACATCCACCAGAACCAGATCTCAAAACTGCAAGTTGCAACAAGCTATCAGCCTCAAACGGTCTCTCTTAA		ATGTGCCTCCGTCCAGTGGTTGATGGTCGAGAGTTGACGGTTCGGTTGCCATGTGCAACGCCCACAATGACATCGCCTTCTCCACATCCACCAGAACCAGATCTCAAAACTGCAAGTTGCAACAAGCTATCAGCCTCAAACGGTCTCTCTTAA		MCLRPVVDGRELTVRLPCATPTMTSPSPHPPEPDLKTASCNKLSASNGLS*		MCLRPVVDGRELTVRLPCATPTMTSPSPHPPEPDLKTASCNKLSASNGLS*		GGCTTAGAGT	TACAAAAATA	0		0	0	0	0	0
48	46	af	AN2446.1	69.m15213	AO070264000031	0			-176	-162			ATGGTCGAGAGTTGA		ATGGTCGAGAGTTGA		MVES*		MVES*		CCAGTGGTTG	CGGTTCGGTT	0		0	0	0	0	0
49	46	af	AN2446.1	69.m15213	AO070264000031	0			-148	-11			ATGTGCAACGCCCACAATGACATCGCCTTCTCCACATCCACCAGAACCAGATCTCAAAACTGCAAGTTGCAACAAGCTATCAGCCTCAAACGGTCTCTCTTAATACAAAAATACAGAAATTACATTCATATCCTGTAA		ATGTGCAACGCCCACAATGACATCGCCTTCTCCACATCCACCAGAACCAGATCTCAAAACTGCAAGTTGCAACAAGCTATCAGCCTCAAACGGTCTCTCTTAATACAAAAATACAGAAATTACATTCATATCCTGTAA		MCNAHNDIAFSTSTRTRSQNCKLQQAISLKRSLLIQKYRNYIHIL*		MCNAHNDIAFSTSTRTRSQNCKLQQAISLKRSLLIQKYRNYIHIL*		TTCGGTTGCC	TAAATTGAAT	0		0	0	0	0	0
50	46	af	AN2446.1	69.m15213	AO070264000031	0			-132	-46			ATGACATCGCCTTCTCCACATCCACCAGAACCAGATCTCAAAACTGCAAGTTGCAACAAGCTATCAGCCTCAAACGGTCTCTCTTAA		ATGACATCGCCTTCTCCACATCCACCAGAACCAGATCTCAAAACTGCAAGTTGCAACAAGCTATCAGCCTCAAACGGTCTCTCTTAA		MTSPSPHPPEPDLKTASCNKLSASNGLS*		MTSPSPHPPEPDLKTASCNKLSASNGLS*		AACGCCCACA	TACAAAAATA	0		0	0	0	0	0
45	46	an	AN2446.1	69.m15213	AO070264000031	0	-142	-50					ATGACATCGTTCCCCCACAGGCCGGAGCCAGACTTCACCTCCGCACACTCGTCAATCCTGAATCTCGACAACATTTTCCAGCGTGATTTTTAA	ATGACATCGTTCCCCCACAGGCCGGAGCCAGACTTCACCTCCGCACACTCGTCAATCCTGAATCTCGACAACATTTTCCAGCGTGATTTTTAA			MTSFPHRPEPDFTSAHSSILNLDNIFQRDF*	MTSFPHRPEPDFTSAHSSILNLDNIFQRDF*			AACGAAAGGA	ACGATTATAT	0		0	0	0	0	0
51	46	ao	AN2446.1	69.m15213	AO070264000031	0					-175	-56	ATGTGCAACAACCAACCCAAACTTTATGACATCGATGTCCCCACTATCTTCGAACTACACAGTACCGGTTTGACCCCAGACCCGATCTTTCTCTCCACCCTGCACATTAGTACCTTGTAG			ATGTGCAACAACCAACCCAAACTTTATGACATCGATGTCCCCACTATCTTCGAACTACACAGTACCGGTTTGACCCCAGACCCGATCTTTCTCTCCACCCTGCACATTAGTACCTTGTAG	MCNNQPKLYDIDVPTIFELHSTGLTPDPIFLSTLHISTL*			MCNNQPKLYDIDVPTIFELHSTGLTPDPIFLSTLHISTL*	TTCGGTTGCC	ACTCCGACTA	0		0	0	0	0	0
52	46	ao	AN2446.1	69.m15213	AO070264000031	0					-150	-103	ATGACATCGATGTCCCCACTATCTTCGAACTACACAGTACCGGTTTGA			ATGACATCGATGTCCCCACTATCTTCGAACTACACAGTACCGGTTTGA	MTSMSPLSSNYTVPV*			MTSMSPLSSNYTVPV*	CCCAAACTTT	CCCCAGACCC	0		0	0	0	0	0
53	46	ao	AN2446.1	69.m15213	AO070264000031	0					-141	-103	ATGTCCCCACTATCTTCGAACTACACAGTACCGGTTTGA			ATGTCCCCACTATCTTCGAACTACACAGTACCGGTTTGA	MSPLSSNYTVPV*			MSPLSSNYTVPV*	TATGACATCG	CCCCAGACCC	0		0	0	0	0	0
56	50	af	AN1157.1	70.m15085	AO070331000147	0			-227	-207			ATGTTCTATCTCATGAATTGA		ATGTTCTATCTCATGAATTGA		MFYLMN*		MFYLMN*		GACGTTCGCT	TCGCCATTCG	0	A	0	0	0	0	0
57	50	af	AN1157.1	70.m15085	AO070331000147	0			-193	-170			ATGACCTCGCACAACACGCATTGA		ATGACCTCGCACAACACGCATTGA		MTSHNTH*		MTSHNTH*		CCATTCGCAG	TCTTCTCTTA	0	A	0	0	0	0	0
54	50	an	AN1157.1	70.m15085	AO070331000147	0	-242	-225					ATGGTTTCCGAACTCTAA	ATGGTTTCCGAACTCTAA			MVSEL*	MVSEL*			CACCAGAAGA	GGAGTCATTT	0	A	0	0	0	0	0
55	50	an	AN1157.1	70.m15085	AO070331000147	0	-111	-16					ATGATCCGTTGCGCTTATATCTGCGCCACCATAGAACCCATCAAGCTGCAGCGTGAAGCTCCAACTTCACTCTGTCTGATTGCCAACCGCAACTGA	ATGATCCGTTGCGCTTATATCTGCGCCACCATAGAACCCATCAAGCTGCAGCGTGAAGCTCCAACTTCACTCTGTCTGATTGCCAACCGCAACTGA			MIRCAYICATIEPIKLQREAPTSLCLIANRN*	MIRCAYICATIEPIKLQREAPTSLCLIANRN*			CGTGCGGTTT	AGCACTACCG	0	A	0	0	0	0	0
60	51	af	AN1507.1	55.m03019	AO070334000226	0			-261	-214			ATGCAAGATTTGAAATTCTGGAAAGAGGTAGTCCCCTCAAGATACTGA		ATGCAAGATTTGAAATTCTGGAAAGAGGTAGTCCCCTCAAGATACTGA		MQDLKFWKEVVPSRY*		MQDLKFWKEVVPSRY*		GCAGTGAACA	ACTTCAACGC	0		0	0	0	0	0
58	51	an	AN1507.1	55.m03019	AO070334000226	0	-152	-78					ATGTCGTCCTTCATGGACTGGTACGAGACTTATGTAAAATACCGTAATAATACAAACCGCAGTCGCGCTTCTTGA	ATGTCGTCCTTCATGGACTGGTACGAGACTTATGTAAAATACCGTAATAATACAAACCGCAGTCGCGCTTCTTGA			MSSFMDWYETYVKYRNNTNRSRAS*	MSSFMDWYETYVKYRNNTNRSRAS*			GCCTTTCTAA	GCCTCATCTC	0		0	0	0	0	0
59	51	an	AN1507.1	55.m03019	AO070334000226	0	-140	-78					ATGGACTGGTACGAGACTTATGTAAAATACCGTAATAATACAAACCGCAGTCGCGCTTCTTGA	ATGGACTGGTACGAGACTTATGTAAAATACCGTAATAATACAAACCGCAGTCGCGCTTCTTGA			MDWYETYVKYRNNTNRSRAS*	MDWYETYVKYRNNTNRSRAS*			GTCGTCCTTC	GCCTCATCTC	0		0	0	0	0	0
61	51	ao	AN1507.1	55.m03019	AO070334000226	0					-255	-118	ATGTTAGACATCATTTCAATGGAATCTCTGCAGAGGGAAAATGTACGAGATATATGTGGATGCCTCAGGATACATAAATACGGGAAAGACGTAAGATTACAGACCTTGGTTGTCGCGCCAAGAGACGCGTCCTTTTGA			ATGTTAGACATCATTTCAATGGAATCTCTGCAGAGGGAAAATGTACGAGATATATGTGGATGCCTCAGGATACATAAATACGGGAAAGACGTAAGATTACAGACCTTGGTTGTCGCGCCAAGAGACGCGTCCTTTTGA	MLDIISMESLQRENVRDICGCLRIHKYGKDVRLQTLVVAPRDASF*			MLDIISMESLQRENVRDICGCLRIHKYGKDVRLQTLVVAPRDASF*	GGACCTTTTA	TTTCCTCCCG	0		0	0	0	0	0
62	51	ao	AN1507.1	55.m03019	AO070334000226	0					-237	-118	ATGGAATCTCTGCAGAGGGAAAATGTACGAGATATATGTGGATGCCTCAGGATACATAAATACGGGAAAGACGTAAGATTACAGACCTTGGTTGTCGCGCCAAGAGACGCGTCCTTTTGA			ATGGAATCTCTGCAGAGGGAAAATGTACGAGATATATGTGGATGCCTCAGGATACATAAATACGGGAAAGACGTAAGATTACAGACCTTGGTTGTCGCGCCAAGAGACGCGTCCTTTTGA	MESLQRENVRDICGCLRIHKYGKDVRLQTLVVAPRDASF*			MESLQRENVRDICGCLRIHKYGKDVRLQTLVVAPRDASF*	CATCATTTCA	TTTCCTCCCG	0		0	0	0	0	0
63	51	ao	AN1507.1	55.m03019	AO070334000226	0					-215	-162	ATGTACGAGATATATGTGGATGCCTCAGGATACATAAATACGGGAAAGACGTAA			ATGTACGAGATATATGTGGATGCCTCAGGATACATAAATACGGGAAAGACGTAA	MYEIYVDASGYINTGKT*			MYEIYVDASGYINTGKT*	CAGAGGGAAA	GATTACAGAC	0		0	0	0	0	0
64	51	ao	AN1507.1	55.m03019	AO070334000226	0					-202	-179	ATGTGGATGCCTCAGGATACATAA			ATGTGGATGCCTCAGGATACATAA	MWMPQDT*			MWMPQDT*	TACGAGATAT	ATACGGGAAA	0		0	0	0	0	0
65	51	ao	AN1507.1	55.m03019	AO070334000226	0					-196	-179	ATGCCTCAGGATACATAA			ATGCCTCAGGATACATAA	MPQDT*			MPQDT*	ATATATGTGG	ATACGGGAAA	0		0	0	0	0	0
67	52	an	AN5580.1	58.m07507	AO070328000024	0	-116	-24					ATGCCGCTACCCCGCGTCAATTGGTGCGGGACATCGTGGGCCGAGCTCTATCCGGGCTTTCCAACGGCGGTTGCTAACGTGAGTTTCCGGTGA	ATGCCGCTACCCCGCGTCAATTGGTGCGGGACATCGTGGGCCGAGCTCTATCCGGGCTTTCCAACGGCGGTTGCTAACGTGAGTTTCCGGTGA			MPLPRVNWCGTSWAELYPGFPTAVANVSFR*	MPLPRVNWCGTSWAELYPGFPTAVANVSFR*			TCCCTGTCAA	AAAAATTAGC	0		0	0	0	0	0
70	54	af	AN6896.1	71.m16024	AO070314000025	0			-275	-201			ATGACGCAAGTCGTAATACTTTCCAGGATCATTCCCGCGATTGTTAAAGCCAGGAAGCAACTCAAAATCGACTGA		ATGACGCAAGTCGTAATACTTTCCAGGATCATTCCCGCGATTGTTAAAGCCAGGAAGCAACTCAAAATCGACTGA		MTQVVILSRIIPAIVKARKQLKID*		MTQVVILSRIIPAIVKARKQLKID*		TACCCAACCA	TCAATCCGAT	0	L	0	0	0	0	0
71	54	af	AN6896.1	71.m16024	AO070314000025	0			-192	-178			ATGAAGCTCTCCTGA		ATGAAGCTCTCCTGA		MKLS*		MKLS*		GATCAATCCG	TTTAATCAGC	0	L	0	0	0	0	0
68	54	an	AN6896.1	71.m16024	AO070314000025	0	-122	-111					ATGGCAACTTGA	ATGGCAACTTGA			MAT*	MAT*			CTCGCAGTCC	ATATACTATA	0	L	0	0	0	0	0
69	54	an	AN6896.1	71.m16024	AO070314000025	0	-95	-78					ATGACTGTCACGCGATAA	ATGACTGTCACGCGATAA			MTVTR*	MTVTR*			CTATAAATAC	TACAATATCG	0	L	0	0	0	0	0
72	54	ao	AN6896.1	71.m16024	AO070314000025	0					-68	-36	ATGCGGCATCGGAAGTATCAAATCAATCCATGA			ATGCGGCATCGGAAGTATCAAATCAATCCATGA	MRHRKYQINP*			MRHRKYQINP*	AAACGCGCCA	GCAAGCCTGT	0	L	0	0	0	0	0
73	56	ao	AN8074.1	53.m04162	AO070330000032	0					-260	-246	ATGTTTGGTTTTTGA			ATGTTTGGTTTTTGA	MFGF*			MFGF*	TTGTGCCTAG	GTTTTGCTTA	0	O	0	0	0	0	0
74	57	ao	AN9142.1	66.m04612	AO070332000112	0					-226	-185	ATGGGAGATAGGAAAGATCAGATCATCGCATTCTTTATTTAA			ATGGGAGATAGGAAAGATCAGATCATCGCATTCTTTATTTAA	MGDRKDQIIAFFI*			MGDRKDQIIAFFI*	TCTTGGGGAG	TACTACGTCG	0		0	0	0	0	0
76	61	af	AN8809.1	71.m15615	AO070276000049	0			-232	-197			ATGGCCGCGCTCCATCTCCGTTGGTCCAAGAGGTAA		ATGGCCGCGCTCCATCTCCGTTGGTCCAAGAGGTAA		MAALHLRWSKR*		MAALHLRWSKR*		AGCTCGCATC	CTTCCCGCTG	0	R	0	0	0	0	0
78	61	ao	AN8809.1	71.m15615	AO070276000049	0					-282	-259	ATGGACCGCACAATACGCAACTAG			ATGGACCGCACAATACGCAACTAG	MDRTIRN*			MDRTIRN*	AAAAATAAGC	GCAGCTTTTT	0	R	0	0	0	0	0
79	61	ao	AN8809.1	71.m15615	AO070276000049	0					-231	-208	ATGTCGGAGTCTCCGCGGGTCTAG			ATGTCGGAGTCTCCGCGGGTCTAG	MSESPRV*			MSESPRV*	TCCCCAGTTC	TACCAAGTTC	0	R	0	0	0	0	0
80	61	ao	AN8809.1	71.m15615	AO070276000049	0					-184	-149	ATGCATTGGCCCAAGAATGCCAACTACCTCCATTGA			ATGCATTGGCCCAAGAATGCCAACTACCTCCATTGA	MHWPKNANYLH*			MHWPKNANYLH*	TTCCCGCTTT	CATTCATCCA	0	R	0	0	0	0	0
81	61	ao	AN8809.1	71.m15615	AO070276000049	0					-168	-70	ATGCCAACTACCTCCATTGACATTCATCCACACGCGGCACTCACCGATTGGAGTATTTTCCAAAGCACCGTTTTTGAAAAGCGTCATATTCAACCCTGA			ATGCCAACTACCTCCATTGACATTCATCCACACGCGGCACTCACCGATTGGAGTATTTTCCAAAGCACCGTTTTTGAAAAGCGTCATATTCAACCCTGA	MPTTSIDIHPHAALTDWSIFQSTVFEKRHIQP*			MPTTSIDIHPHAALTDWSIFQSTVFEKRHIQP*	TGGCCCAAGA	ATTTCGATCA	0	R	0	0	0	0	0
83	64	an	AN1549.1	55.m03069	AO070339000302	0	-238	-197					ATGGCTGCTATCCGACCTCGTCCAATGGACGAATATAAATGA	ATGGCTGCTATCCGACCTCGTCCAATGGACGAATATAAATGA			MAAIRPRPMDEYK*	MAAIRPRPMDEYK*			TCAGTTTGCC	TAGATCTTTG	0		0	0	0	0	0
84	64	an	AN1549.1	55.m03069	AO070339000302	0	-214	-197					ATGGACGAATATAAATGA	ATGGACGAATATAAATGA			MDEYK*	MDEYK*			ACCTCGTCCA	TAGATCTTTG	0		0	0	0	0	0
85	64	an	AN1549.1	55.m03069	AO070339000302	0	-200	-186					ATGATAGATCTTTGA	ATGATAGATCTTTGA			MIDL*	MIDL*			ACGAATATAA	AGCAAGAAGT	0		0	0	0	0	0
86	64	ao	AN1549.1	55.m03069	AO070339000302	0					-261	-241	ATGTGGCATCATGGATGGTGA			ATGTGGCATCATGGATGGTGA	MWHHGW*			MWHHGW*	TGGTGCTGGG	GAGGCTTGGG	0		0	0	0	0	0
87	64	ao	AN1549.1	55.m03069	AO070339000302	0					-251	-228	ATGGATGGTGAGAGGCTTGGGTGA			ATGGATGGTGAGAGGCTTGGGTGA	MDGERLG*			MDGERLG*	ATGTGGCATC	TCGATGTTGC	0		0	0	0	0	0
88	64	ao	AN1549.1	55.m03069	AO070339000302	0					-247	-194	ATGGTGAGAGGCTTGGGTGATCGATGTTGCTGGACATGGATGTTGGGTATATAA			ATGGTGAGAGGCTTGGGTGATCGATGTTGCTGGACATGGATGTTGGGTATATAA	MVRGLGDRCCWTWMLGI*			MVRGLGDRCCWTWMLGI*	GGCATCATGG	GGGATTGGAG	0		0	0	0	0	0
89	64	ao	AN1549.1	55.m03069	AO070339000302	0					-224	-87	ATGTTGCTGGACATGGATGTTGGGTATATAAGGGATTGGAGCATGGATGGACTTGGTGTCTATTCTTCATCATCAGAACAACATAACAAAGCAAGCAAGTCTATCTTACAGCAACTACTATCTTGTTCACTGCGCTGA			ATGTTGCTGGACATGGATGTTGGGTATATAAGGGATTGGAGCATGGATGGACTTGGTGTCTATTCTTCATCATCAGAACAACATAACAAAGCAAGCAAGTCTATCTTACAGCAACTACTATCTTGTTCACTGCGCTGA	MLLDMDVGYIRDWSMDGLGVYSSSSEQHNKASKSILQQLLSCSLR*			MLLDMDVGYIRDWSMDGLGVYSSSSEQHNKASKSILQQLLSCSLR*	TGGGTGATCG	ATAACCTCTT	0		0	0	0	0	0
90	64	ao	AN1549.1	55.m03069	AO070339000302	0					-212	-87	ATGGATGTTGGGTATATAAGGGATTGGAGCATGGATGGACTTGGTGTCTATTCTTCATCATCAGAACAACATAACAAAGCAAGCAAGTCTATCTTACAGCAACTACTATCTTGTTCACTGCGCTGA			ATGGATGTTGGGTATATAAGGGATTGGAGCATGGATGGACTTGGTGTCTATTCTTCATCATCAGAACAACATAACAAAGCAAGCAAGTCTATCTTACAGCAACTACTATCTTGTTCACTGCGCTGA	MDVGYIRDWSMDGLGVYSSSSEQHNKASKSILQQLLSCSLR*			MDVGYIRDWSMDGLGVYSSSSEQHNKASKSILQQLLSCSLR*	GTTGCTGGAC	ATAACCTCTT	0		0	0	0	0	0
91	64	ao	AN1549.1	55.m03069	AO070339000302	0					-208	-194	ATGTTGGGTATATAA			ATGTTGGGTATATAA	MLGI*			MLGI*	CTGGACATGG	GGGATTGGAG	0		0	0	0	0	0
92	64	ao	AN1549.1	55.m03069	AO070339000302	0					-182	-87	ATGGATGGACTTGGTGTCTATTCTTCATCATCAGAACAACATAACAAAGCAAGCAAGTCTATCTTACAGCAACTACTATCTTGTTCACTGCGCTGA			ATGGATGGACTTGGTGTCTATTCTTCATCATCAGAACAACATAACAAAGCAAGCAAGTCTATCTTACAGCAACTACTATCTTGTTCACTGCGCTGA	MDGLGVYSSSSEQHNKASKSILQQLLSCSLR*			MDGLGVYSSSSEQHNKASKSILQQLLSCSLR*	GGATTGGAGC	ATAACCTCTT	0		0	0	0	0	0
93	64	ao	AN1549.1	55.m03069	AO070339000302	0					-178	-83	ATGGACTTGGTGTCTATTCTTCATCATCAGAACAACATAACAAAGCAAGCAAGTCTATCTTACAGCAACTACTATCTTGTTCACTGCGCTGAATAA			ATGGACTTGGTGTCTATTCTTCATCATCAGAACAACATAACAAAGCAAGCAAGTCTATCTTACAGCAACTACTATCTTGTTCACTGCGCTGAATAA	MDLVSILHHQNNITKQASLSYSNYYLVHCAE*			MDLVSILHHQNNITKQASLSYSNYYLVHCAE*	TGGAGCATGG	CCTCTTGGGT	0		0	0	0	0	0
94	70	conserved	AN3169.1	59.m09379	AO070256000021	0	-262	-212	-281	-225	-266	-216	ATGTyyyyTymryyChwkymvTyGrrshbyGTyywhGmhyyysmkyCwysrCCATGA	ATGTCTCTTTCGTCCTTGCCCTTGAAGCGTGTTCAAGACTCCCCGCCATGA	ATGTCTCCTCAGTCCAATTCGTCGGGCTTCGTCTACGCTCTTGATTCTCCGCCATGA	ATGTTCTCTCCACTCCATCAATCGGACACCGTTCTTGAATCCCCGCCATGA	MslsslplkrVqdspp*	MSLSSLPLKRVQDSPP*	MSPQSNSSGFVYALDSPP*	MFSPLHQSDTVLESPP*	mhyThmTyCm	ksTAGTkbyy	0	FE	0	0	0	0	0
95	79	af	AN8759.1	62.m03461	AO070312000139	0			-161	-126			ATGCGGGGTACGGCACAATTCCGCTGTAGCCTATAA		ATGCGGGGTACGGCACAATTCCGCTGTAGCCTATAA		MRGTAQFRCSL*		MRGTAQFRCSL*		CCAGGAGTAT	CCTGTACAAT	0	IR	0	0	0	0	0
96	79	af	AN8759.1	62.m03461	AO070312000139	0			-117	-76			ATGACCGTCAAGAGAGATTACGGGGTTTGTACGGTGTATTAG		ATGACCGTCAAGAGAGATTACGGGGTTTGTACGGTGTATTAG		MTVKRDYGVCTVY*		MTVKRDYGVCTVY*		AACCTGTACA	AATGAGGGTA	0	IR	0	0	0	0	0
97	79	af	AN8759.1	62.m03461	AO070312000139	0			-74	-36			ATGAGGGTATTGGTATTTGTATATCAACCACGCCGTTAG		ATGAGGGTATTGGTATTTGTATATCAACCACGCCGTTAG		MRVLVFVYQPRR*		MRVLVFVYQPRR*		GTGTATTAGA	AAGTTTACCC	0	IR	0	0	0	0	0
98	79	ao	AN8759.1	62.m03461	AO070312000139	0					-287	-246	ATGCCACCTTACGTGCCAGTTTCCACATTTCACACTCCATGA			ATGCCACCTTACGTGCCAGTTTCCACATTTCACACTCCATGA	MPPYVPVSTFHTP*			MPPYVPVSTFHTP*	ACAGAGATTC	TGCCATTAAT	0	IR	0	0	0	0	0
99	79	ao	AN8759.1	62.m03461	AO070312000139	0					-249	-181	ATGATGCCATTAATTCCGCGCCATCGGCTCGTCCTGCATGCAGGATCCGGGGCACACTCATCCCCGTGA			ATGATGCCATTAATTCCGCGCCATCGGCTCGTCCTGCATGCAGGATCCGGGGCACACTCATCCCCGTGA	MMPLIPRHRLVLHAGSGAHSSP*			MMPLIPRHRLVLHAGSGAHSSP*	TTCACACTCC	TCTCGAAAGC	0	IR	0	0	0	0	0
100	79	ao	AN8759.1	62.m03461	AO070312000139	0					-246	-181	ATGCCATTAATTCCGCGCCATCGGCTCGTCCTGCATGCAGGATCCGGGGCACACTCATCCCCGTGA			ATGCCATTAATTCCGCGCCATCGGCTCGTCCTGCATGCAGGATCCGGGGCACACTCATCCCCGTGA	MPLIPRHRLVLHAGSGAHSSP*			MPLIPRHRLVLHAGSGAHSSP*	ACACTCCATG	TCTCGAAAGC	0	IR	0	0	0	0	0
101	79	ao	AN8759.1	62.m03461	AO070312000139	0					-212	-69	ATGCAGGATCCGGGGCACACTCATCCCCGTGATCTCGAAAGCATCGAGACCGCCGATCTCGGGAATACCCCAGCAGCGATGTGGAGAACTGTCAAGGAGGGGTTTGGAATCAGTACCAGAGATTGTCGCCGATGTGAAATATGA			ATGCAGGATCCGGGGCACACTCATCCCCGTGATCTCGAAAGCATCGAGACCGCCGATCTCGGGAATACCCCAGCAGCGATGTGGAGAACTGTCAAGGAGGGGTTTGGAATCAGTACCAGAGATTGTCGCCGATGTGAAATATGA	MQDPGHTHPRDLESIETADLGNTPAAMWRTVKEGFGISTRDCRRCEI*			MQDPGHTHPRDLESIETADLGNTPAAMWRTVKEGFGISTRDCRRCEI*	CTCGTCCTGC	GAGATGCCAG	0	IR	0	0	0	0	0
102	79	ao	AN8759.1	62.m03461	AO070312000139	0					-134	-69	ATGTGGAGAACTGTCAAGGAGGGGTTTGGAATCAGTACCAGAGATTGTCGCCGATGTGAAATATGA			ATGTGGAGAACTGTCAAGGAGGGGTTTGGAATCAGTACCAGAGATTGTCGCCGATGTGAAATATGA	MWRTVKEGFGISTRDCRRCEI*			MWRTVKEGFGISTRDCRRCEI*	CCCAGCAGCG	GAGATGCCAG	0	IR	0	0	0	0	0
103	79	ao	AN8759.1	62.m03461	AO070312000139	0					-72	-31	ATGAGAGATGCCAGAGGATATAGCCACCGAATCCAAGATTAG			ATGAGAGATGCCAGAGGATATAGCCACCGAATCCAAGATTAG	MRDARGYSHRIQD*			MRDARGYSHRIQD*	GATGTGAAAT	CCTCATTCAC	0	IR	0	0	0	0	0
104	79	ao	AN8759.1	62.m03461	AO070312000139	0					-65	-18	ATGCCAGAGGATATAGCCACCGAATCCAAGATTAGCCTCATTCACTGA			ATGCCAGAGGATATAGCCACCGAATCCAAGATTAGCCTCATTCACTGA	MPEDIATESKISLIH*			MPEDIATESKISLIH*	AATATGAGAG	ACTCTACCCA	0	IR	0	0	0	0	0
107	84	af	AN0635.1	70.m15647	AO070318000125	0			-230	-159			ATGACTATGAAGTCACTTCATCAGCTTGACGTAATGTTCTGGTTGTATCTTTGGACCCCTGCACATGAGTAA		ATGACTATGAAGTCACTTCATCAGCTTGACGTAATGTTCTGGTTGTATCTTTGGACCCCTGCACATGAGTAA		MTMKSLHQLDVMFWLYLWTPAHE*		MTMKSLHQLDVMFWLYLWTPAHE*		AGCGTATGAT	ATAGATGAGA	0		0	0	0	0	0
108	84	af	AN0635.1	70.m15647	AO070318000125	0			-224	-159			ATGAAGTCACTTCATCAGCTTGACGTAATGTTCTGGTTGTATCTTTGGACCCCTGCACATGAGTAA		ATGAAGTCACTTCATCAGCTTGACGTAATGTTCTGGTTGTATCTTTGGACCCCTGCACATGAGTAA		MKSLHQLDVMFWLYLWTPAHE*		MKSLHQLDVMFWLYLWTPAHE*		TGATATGACT	ATAGATGAGA	0		0	0	0	0	0
109	84	af	AN0635.1	70.m15647	AO070318000125	0			-197	-159			ATGTTCTGGTTGTATCTTTGGACCCCTGCACATGAGTAA		ATGTTCTGGTTGTATCTTTGGACCCCTGCACATGAGTAA		MFWLYLWTPAHE*		MFWLYLWTPAHE*		GCTTGACGTA	ATAGATGAGA	0		0	0	0	0	0
110	84	af	AN0635.1	70.m15647	AO070318000125	0			-166	-155			ATGAGTAAATAG		ATGAGTAAATAG		MSK*		MSK*		ACCCCTGCAC	ATGAGATGAT	0		0	0	0	0	0
105	84	an	AN0635.1	70.m15647	AO070318000125	0	-170	-147					ATGAAGTCAGCAGTGGTTGGTTGA	ATGAAGTCAGCAGTGGTTGGTTGA			MKSAVVG*	MKSAVVG*			TGATCTGATT	CGTCACGCCT	0		0	0	0	0	0
106	84	an	AN0635.1	70.m15647	AO070318000125	0	-104	-93					ATGCAGAGTTAG	ATGCAGAGTTAG			MQS*	MQS*			CCGCATATAT	CTTAATCTAT	0		0	0	0	0	0
111	84	ao	AN0635.1	70.m15647	AO070318000125	0					-238	-179	ATGGATGTCGATGGTGGTGAGTTAAGTATGAAGTCAACCCCATCAGCCTTGACGTCATAG			ATGGATGTCGATGGTGGTGAGTTAAGTATGAAGTCAACCCCATCAGCCTTGACGTCATAG	MDVDGGELSMKSTPSALTS*			MDVDGGELSMKSTPSALTS*	GAATTAAATC	GGTTACTGGC	0		0	0	0	0	0
112	84	ao	AN0635.1	70.m15647	AO070318000125	0					-234	-214	ATGTCGATGGTGGTGAGTTAA			ATGTCGATGGTGGTGAGTTAA	MSMVVS*			MSMVVS*	TAAATCATGG	GTATGAAGTC	0		0	0	0	0	0
113	84	ao	AN0635.1	70.m15647	AO070318000125	0					-228	-214	ATGGTGGTGAGTTAA			ATGGTGGTGAGTTAA	MVVS*			MVVS*	ATGGATGTCG	GTATGAAGTC	0		0	0	0	0	0
114	84	ao	AN0635.1	70.m15647	AO070318000125	0					-211	-179	ATGAAGTCAACCCCATCAGCCTTGACGTCATAG			ATGAAGTCAACCCCATCAGCCTTGACGTCATAG	MKSTPSALTS*			MKSTPSALTS*	TGAGTTAAGT	GGTTACTGGC	0		0	0	0	0	0
115	84	ao	AN0635.1	70.m15647	AO070318000125	0					-168	-151	ATGCATCGAGTAGGTTGA			ATGCATCGAGTAGGTTGA	MHRVG*			MHRVG*	GGTTACTGGC	AGGGTTATAA	0		0	0	0	0	0
118	86	an	AN7302.1	72.m19765	AO070297000048	0	-258	-247					ATGTTTTTGTGA	ATGTTTTTGTGA			MFL*	MFL*			AAAGACCCCA	TCGCCCTTGG	0	U	0	0	0	0	0
120	92	ao	AN8843.1	71.m15975	AO070271000034	0					-262	-251	ATGACAGGTTAA			ATGACAGGTTAA	MTG*			MTG*	TCGGATTGAT	CCCATCTCTT	0	E	FG10211.1	0	0	YHR025W	YHR025W
124	95	af	AN3687.1	69.m15395	AO070342000308	0			-251	-180			ATGGAGAACTTAGATGGCTCCATGTTGCCATACCAGCCAGAGGAGACCATGACGAAATACGTTCAGTGGTGA		ATGGAGAACTTAGATGGCTCCATGTTGCCATACCAGCCAGAGGAGACCATGACGAAATACGTTCAGTGGTGA		MENLDGSMLPYQPEETMTKYVQW*		MENLDGSMLPYQPEETMTKYVQW*		AAAAGTGTTG	AGCGCCTCGG	0	O	0	0	0	0	0
125	95	af	AN3687.1	69.m15395	AO070342000308	0			-238	-200			ATGGCTCCATGTTGCCATACCAGCCAGAGGAGACCATGA		ATGGCTCCATGTTGCCATACCAGCCAGAGGAGACCATGA		MAPCCHTSQRRP*		MAPCCHTSQRRP*		GAGAACTTAG	CGAAATACGT	0	O	0	0	0	0	0
126	95	af	AN3687.1	69.m15395	AO070342000308	0			-230	-180			ATGTTGCCATACCAGCCAGAGGAGACCATGACGAAATACGTTCAGTGGTGA		ATGTTGCCATACCAGCCAGAGGAGACCATGACGAAATACGTTCAGTGGTGA		MLPYQPEETMTKYVQW*		MLPYQPEETMTKYVQW*		AGATGGCTCC	AGCGCCTCGG	0	O	0	0	0	0	0
127	95	af	AN3687.1	69.m15395	AO070342000308	0			-203	-180			ATGACGAAATACGTTCAGTGGTGA		ATGACGAAATACGTTCAGTGGTGA		MTKYVQW*		MTKYVQW*		AGAGGAGACC	AGCGCCTCGG	0	O	0	0	0	0	0
128	95	af	AN3687.1	69.m15395	AO070342000308	0			-82	-47			ATGTCAATTGAATTAGCACATTTAAATATCTCATAG		ATGTCAATTGAATTAGCACATTTAAATATCTCATAG		MSIELAHLNIS*		MSIELAHLNIS*		GAACCATTAT	CCGCTATAAC	0	O	0	0	0	0	0
121	95	an	AN3687.1	69.m15395	AO070342000308	0	-233	-216					ATGTTGCTGTTAGATTGA	ATGTTGCTGTTAGATTGA			MLLLD*	MLLLD*			ATACAGTTAG	GAAGATGAAG	0	O	0	0	0	0	0
122	95	an	AN3687.1	69.m15395	AO070342000308	0	-211	-188					ATGAAGTCTTCTTCTGACAGTTAA	ATGAAGTCTTCTTCTGACAGTTAA			MKSSSDS*	MKSSSDS*			GATTGAGAAG	CGGTTGCCGG	0	O	0	0	0	0	0
123	95	an	AN3687.1	69.m15395	AO070342000308	0	-155	-45					ATGACGTGCGTAGCTGACTCAGGCCACCGCAAGTTCCTCGCGTCCTCGAGCTCATCCGCATCACAGCTCCCAGGGACAATTACCTCGAATTCCCTATCATTATCTTATTAG	ATGACGTGCGTAGCTGACTCAGGCCACCGCAAGTTCCTCGCGTCCTCGAGCTCATCCGCATCACAGCTCCCAGGGACAATTACCTCGAATTCCCTATCATTATCTTATTAG			MTCVADSGHRKFLASSSSSASQLPGTITSNSLSLSY*	MTCVADSGHRKFLASSSSSASQLPGTITSNSLSLSY*			TAACTAAACA	CATAACAACA	0	O	0	0	0	0	0
129	95	ao	AN3687.1	69.m15395	AO070342000308	0					-211	-197	ATGACGCAATGCTGA			ATGACGCAATGCTGA	MTQC*			MTQC*	GAAACGCGCT	GTAATGGGAA	0	O	0	0	0	0	0
130	95	ao	AN3687.1	69.m15395	AO070342000308	0					-203	-126	ATGCTGAGTAATGGGAATCATACCCCTCAGCGACCAATCAGGATGCACGGGTACCTTGCCGATGACGGACGATGTTGA			ATGCTGAGTAATGGGAATCATACCCCTCAGCGACCAATCAGGATGCACGGGTACCTTGCCGATGACGGACGATGTTGA	MLSNGNHTPQRPIRMHGYLADDGRC*			MLSNGNHTPQRPIRMHGYLADDGRC*	CTATGACGCA	ACCTCCTCCA	0	O	0	0	0	0	0
131	95	ao	AN3687.1	69.m15395	AO070342000308	0					-193	-77	ATGGGAATCATACCCCTCAGCGACCAATCAGGATGCACGGGTACCTTGCCGATGACGGACGATGTTGAACCTCCTCCAATCTGCATCAGCAACTTAAACAACAACTACTCCGGGTGA			ATGGGAATCATACCCCTCAGCGACCAATCAGGATGCACGGGTACCTTGCCGATGACGGACGATGTTGAACCTCCTCCAATCTGCATCAGCAACTTAAACAACAACTACTCCGGGTGA	MGIIPLSDQSGCTGTLPMTDDVEPPPICISNLNNNYSG*			MGIIPLSDQSGCTGTLPMTDDVEPPPICISNLNNNYSG*	ATGCTGAGTA	AGACGTCTAC	0	O	0	0	0	0	0
132	95	ao	AN3687.1	69.m15395	AO070342000308	0					-161	-126	ATGCACGGGTACCTTGCCGATGACGGACGATGTTGA			ATGCACGGGTACCTTGCCGATGACGGACGATGTTGA	MHGYLADDGRC*			MHGYLADDGRC*	ACCAATCAGG	ACCTCCTCCA	0	O	0	0	0	0	0
133	95	ao	AN3687.1	69.m15395	AO070342000308	0					-142	-77	ATGACGGACGATGTTGAACCTCCTCCAATCTGCATCAGCAACTTAAACAACAACTACTCCGGGTGA			ATGACGGACGATGTTGAACCTCCTCCAATCTGCATCAGCAACTTAAACAACAACTACTCCGGGTGA	MTDDVEPPPICISNLNNNYSG*			MTDDVEPPPICISNLNNNYSG*	TACCTTGCCG	AGACGTCTAC	0	O	0	0	0	0	0
134	95	ao	AN3687.1	69.m15395	AO070342000308	0					-132	-97	ATGTTGAACCTCCTCCAATCTGCATCAGCAACTTAA			ATGTTGAACCTCCTCCAATCTGCATCAGCAACTTAA	MLNLLQSASAT*			MLNLLQSASAT*	ATGACGGACG	ACAACAACTA	0	O	0	0	0	0	0
135	100	af	AN6568.1	62.m03155	AO070326000011	0			-204	-85			ATGCATTTCCCCTCCCACAACGGTGGATTGCCTTTGGATATCCCTCCATTGCCTTGGAGATCTACTGAGAGTTACTTCCTCTCTTTATCTCCTCGATACCCCCCTCCTCTACCTTGTTGA		ATGCATTTCCCCTCCCACAACGGTGGATTGCCTTTGGATATCCCTCCATTGCCTTGGAGATCTACTGAGAGTTACTTCCTCTCTTTATCTCCTCGATACCCCCCTCCTCTACCTTGTTGA		MHFPSHNGGLPLDIPPLPWRSTESYFLSLSPRYPPPLPC*		MHFPSHNGGLPLDIPPLPWRSTESYFLSLSPRYPPPLPC*		AACCCACTCC	AATCGTCTGT	0	S	0	0	0	YDR257C	YDR257C
137	103	af	AN8857.1	71.m15995	AO070271000016	0			-207	-136			ATGGACCATTGTCATTTTTCCATGCCTGGAGGGGGTGCCATTTCATGTATTATCTACTTTCAGAAATCATAA		ATGGACCATTGTCATTTTTCCATGCCTGGAGGGGGTGCCATTTCATGTATTATCTACTTTCAGAAATCATAA		MDHCHFSMPGGGAISCIIYFQKS*		MDHCHFSMPGGGAISCIIYFQKS*		CGCGGCAGAA	CGCCACCGGG	0	K	0	MG06309.1	0	0	0
138	103	af	AN8857.1	71.m15995	AO070271000016	0			-186	-136			ATGCCTGGAGGGGGTGCCATTTCATGTATTATCTACTTTCAGAAATCATAA		ATGCCTGGAGGGGGTGCCATTTCATGTATTATCTACTTTCAGAAATCATAA		MPGGGAISCIIYFQKS*		MPGGGAISCIIYFQKS*		TCATTTTTCC	CGCCACCGGG	0	K	0	MG06309.1	0	0	0
139	103	af	AN8857.1	71.m15995	AO070271000016	0			-163	-110			ATGTATTATCTACTTTCAGAAATCATAACGCCACCGGGTCCTCTGGAAGACTAA		ATGTATTATCTACTTTCAGAAATCATAACGCCACCGGGTCCTCTGGAAGACTAA		MYYLLSEIITPPGPLED*		MYYLLSEIITPPGPLED*		GTGCCATTTC	AGCGAAAAAC	0	K	0	MG06309.1	0	0	0
136	103	an	AN8857.1	71.m15995	AO070271000016	0	-172	-149					ATGCACTATCTGATAAGGTCTTAG	ATGCACTATCTGATAAGGTCTTAG			MHYLIRS*	MHYLIRS*			CGGTGAGAGC	CCTGGTTCTT	0	K	0	MG06309.1	0	0	0
146	113	af	AN5335.1	69.m15576	AO070333000215	0			-206	-57			ATGAAGACTTGTCGTGTGGGGGGAAAAAATGAGCCACTGGCCTCTCCCCGGTTCTTTTTCTCGGTTCAGGACATTGCGGTTAAACAAGGAGACGGAGTGTGGTGTCATGTTAGGTTGCTTCTTCGACCTCCAAAGGTGGTTTTCTACTGA		ATGAAGACTTGTCGTGTGGGGGGAAAAAATGAGCCACTGGCCTCTCCCCGGTTCTTTTTCTCGGTTCAGGACATTGCGGTTAAACAAGGAGACGGAGTGTGGTGTCATGTTAGGTTGCTTCTTCGACCTCCAAAGGTGGTTTTCTACTGA		MKTCRVGGKNEPLASPRFFFSVQDIAVKQGDGVWCHVRLLLRPPKVVFY*		MKTCRVGGKNEPLASPRFFFSVQDIAVKQGDGVWCHVRLLLRPPKVVFY*		AGTTCTAGCA	TTTCTTTCAA	0	Q	0	0	0	0	0
144	113	an	AN5335.1	69.m15576	AO070333000215	0	-98	-66					ATGCCACTTGGTTTAGTCAAGACGACTCAATGA	ATGCCACTTGGTTTAGTCAAGACGACTCAATGA			MPLGLVKTTQ*	MPLGLVKTTQ*			CTCATAAATC	TTAGGATACT	0	Q	0	0	0	0	0
145	113	an	AN5335.1	69.m15576	AO070333000215	0	-69	-37					ATGATTAGGATACTTCCGCCACTGCTCACTTAA	ATGATTAGGATACTTCCGCCACTGCTCACTTAA			MIRILPPLLT*	MIRILPPLLT*			AGACGACTCA	TAATGCTCTT	0	Q	0	0	0	0	0
147	113	ao	AN5335.1	69.m15576	AO070333000215	0					-186	-34	ATGCCACCTGCCAATTTCCGGCTATTTTTCTTCGTTCGGGTTCCCTCTCGGAATATTGCGGCCCAAGAAAAGGGGACAATTTGGCAACGGTTGGGCTTTGTACTCGCAAATTCGAAAGCCAACAAACCTCGGCCGCTTCTACAGGATCTTTAG			ATGCCACCTGCCAATTTCCGGCTATTTTTCTTCGTTCGGGTTCCCTCTCGGAATATTGCGGCCCAAGAAAAGGGGACAATTTGGCAACGGTTGGGCTTTGTACTCGCAAATTCGAAAGCCAACAAACCTCGGCCGCTTCTACAGGATCTTTAG	MPPANFRLFFFVRVPSRNIAAQEKGTIWQRLGFVLANSKANKPRPLLQDL*			MPPANFRLFFFVRVPSRNIAAQEKGTIWQRLGFVLANSKANKPRPLLQDL*	GTGAACCAAA	GAAGATGTGC	0	Q	0	0	0	0	0
157	117	an	AN4192.1	54.m06754	AO070342000112	0	-207	-166					ATGAGATTCTCTGACAGCTCAGCGAAGCGGGCCTGGATTTAG	ATGAGATTCTCTGACAGCTCAGCGAAGCGGGCCTGGATTTAG			MRFSDSSAKRAWI*	MRFSDSSAKRAWI*			TCGGAGTTCG	ATATCTGCTT	0	O	0	0	0	0	0
159	120	af	AN0668.1	70.m15271	AO070343000552	0			-69	-31			ATGCTTGTTTCTATGCTACCTTACTGGACACGGGCTTGA		ATGCTTGTTTCTATGCTACCTTACTGGACACGGGCTTGA		MLVSMLPYWTRA*		MLVSMLPYWTRA*		TCCCCTCCAA	TCCGTCCCGA	0	R	0	0	0	0	0
158	120	an	AN0668.1	70.m15271	AO070343000552	0	-207	-85					ATGTTGTTTTTTACTCTTGACGCCGCCTCTGTGTTTCTCCTGCGTACAGAAGCTGTCTGCCTTTTATCTGGACTGGTAGAATTAGCAGAGCTGGCTAAGCTTGTCTTCTACCCCTCGAAATAA	ATGTTGTTTTTTACTCTTGACGCCGCCTCTGTGTTTCTCCTGCGTACAGAAGCTGTCTGCCTTTTATCTGGACTGGTAGAATTAGCAGAGCTGGCTAAGCTTGTCTTCTACCCCTCGAAATAA			MLFFTLDAASVFLLRTEAVCLLSGLVELAELAKLVFYPSK*	MLFFTLDAASVFLLRTEAVCLLSGLVELAELAKLVFYPSK*			CTGCTCAAAT	ACAAGACCTA	0	R	0	0	0	0	0
161	120	ao	AN0668.1	70.m15271	AO070343000552	0					-208	-152	ATGTGTTTGAACAAGAAAGAAGATGGAAATAGAAAGGATCTTTTCCACAGATTGTGA			ATGTGTTTGAACAAGAAAGAAGATGGAAATAGAAAGGATCTTTTCCACAGATTGTGA	MCLNKKEDGNRKDLFHRL*			MCLNKKEDGNRKDLFHRL*	ATTCACTGAA	AAGTGAGTCT	0	R	0	0	0	0	0
162	120	ao	AN0668.1	70.m15271	AO070343000552	0					-186	-43	ATGGAAATAGAAAGGATCTTTTCCACAGATTGTGAAAGTGAGTCTTTTCTCGTTTTTAAAATAATTCCCCTGCGTCTCCAAGTCCCATCTTCCAAGAAAGTCAACCCACTTTCCCTTCACGTCTGCCCCTCCATTCAATACTAA			ATGGAAATAGAAAGGATCTTTTCCACAGATTGTGAAAGTGAGTCTTTTCTCGTTTTTAAAATAATTCCCCTGCGTCTCCAAGTCCCATCTTCCAAGAAAGTCAACCCACTTTCCCTTCACGTCTGCCCCTCCATTCAATACTAA	MEIERIFSTDCESESFLVFKIIPLRLQVPSSKKVNPLSLHVCPSIQY*			MEIERIFSTDCESESFLVFKIIPLRLQVPSSKKVNPLSLHVCPSIQY*	AAGAAAGAAG	TTATACCCAA	0	R	0	0	0	0	0
166	126	af	AN8860.1	71.m15999	AO070271000011	0			-193	-92			ATGAAGCTTCTACATAAGCAGTACCTTCACTGTACCTGTGATTTTGAGTTCGCCTTTGTTGCGAATTTATGCCTGAGGCCCAAAGAAGTGCCGCCCCGCTGA		ATGAAGCTTCTACATAAGCAGTACCTTCACTGTACCTGTGATTTTGAGTTCGCCTTTGTTGCGAATTTATGCCTGAGGCCCAAAGAAGTGCCGCCCCGCTGA		MKLLHKQYLHCTCDFEFAFVANLCLRPKEVPPR*		MKLLHKQYLHCTCDFEFAFVANLCLRPKEVPPR*		TAGAGAATTA	AAAATTCCCC	0	F	0	0	0	0	0
167	126	af	AN8860.1	71.m15999	AO070271000011	0			-61	-41			ATGGTACCAGACACGACTTAA		ATGGTACCAGACACGACTTAA		MVPDTT*		MVPDTT*		ATTCCGTTGC	TCATCACTCT	0	F	0	0	0	0	0
163	126	an	AN8860.1	71.m15999	AO070271000011	0	-150	-130					ATGCCCCACTCTCCGAGTTGA	ATGCCCCACTCTCCGAGTTGA			MPHSPS*	MPHSPS*			ATACTTTAAA	TGCCCCAGGA	0	F	0	0	0	0	0
164	126	an	AN8860.1	71.m15999	AO070271000011	0	-130	-56					ATGCCCCAGGAACTAACACCCCGCCAAAATTTTCTCTTGGCATATGAGCTGCTGGTCACTAGAATCAGATTCTAA	ATGCCCCAGGAACTAACACCCCGCCAAAATTTTCTCTTGGCATATGAGCTGCTGGTCACTAGAATCAGATTCTAA			MPQELTPRQNFLLAYELLVTRIRF*	MPQELTPRQNFLLAYELLVTRIRF*			CTCCGAGTTG	CGGCGGTCAT	0	F	0	0	0	0	0
165	126	an	AN8860.1	71.m15999	AO070271000011	0	-87	-16					ATGAGCTGCTGGTCACTAGAATCAGATTCTAACGGCGGTCATTCAAATCCTTTCTCTCAATCACTTTATTGA	ATGAGCTGCTGGTCACTAGAATCAGATTCTAACGGCGGTCATTCAAATCCTTTCTCTCAATCACTTTATTGA			MSCWSLESDSNGGHSNPFSQSLY*	MSCWSLESDSNGGHSNPFSQSLY*			CTCTTGGCAT	TAACCATAAT	0	F	0	0	0	0	0
168	126	ao	AN8860.1	71.m15999	AO070271000011	0					-176	-123	ATGTGCTATATCCGTCGGATCGGACCCACTTTTCCCGCTGAAATAGGTGCCTGA			ATGTGCTATATCCGTCGGATCGGACCCACTTTTCCCGCTGAAATAGGTGCCTGA	MCYIRRIGPTFPAEIGA*			MCYIRRIGPTFPAEIGA*	CTAGTATTTA	GGTGTTCGTT	0	F	0	0	0	0	0
169	130	ao	AN7742.1	71.m15770	AO070325000166	0					-124	-86	ATGACAGTTAAACCTCTGGGAGAAGCAGTTGACATTTGA			ATGACAGTTAAACCTCTGGGAGAAGCAGTTGACATTTGA	MTVKPLGEAVDI*			MTVKPLGEAVDI*	AAGCAACGTA	CTTCCATTTT	0	L	0	0	0	0	0
[truncated: 9,738 more rows]

## Sheet: conserved_only
uORF_id	ortholog_cluster_id	species	an_gene	af_gene	ao_gene	in_utr	an_rel_start	an_rel_stop	af_rel_start	af_rel_stop	ao_rel_start	ao_rel_stop	consensus_dna	an_dna	af_dna	ao_dna	consensus_aa	an_aa	af_aa	ao_aa	context_up_consensus	context_down_consensus	within 60bp	COG category	fg_uorf_utr	mg_uorf_utr	nc_uorf_utr	sc_uorf_100bp	sc_cooccur_orf_100bp
[truncated: 39 more rows]

[truncated: 1 more sheets: orthologs]
