# Supplementary material for: Sequencing of Aspergillus nidulans and comparative analysis with A. fumigatus and A. oryzae
Source: Springer Nature journal article supplement (doi:10.1038/nature04341), 2005-12-01
Supplement: 41586_2005_BFnature04341_MOESM5_ESM.xls [file 41586_2005_BFnature04341_MOESM5_ESM.xls]

## Sheet: Description
§S4 Conserved Non-Coding conpats
Method:
To search for conserved non-coding conpats with enriched statistical signals, we started with the set of 4936 ortholog triplets and 1000bp upstream and downstream regions multiply aligned using MLAGAN. The High-scoring Conserved Sequence (HCS) blocks were identified as described in the paper, and aligned all-vs-all to identify the best local alignment between pairs. Local alignments were clustere…
Co-occurrence Enrichment - conpat occurs more often than random conpats of same length and degeneracy. Pvalue assigned by comparing observed co-occurrences to distribution of 1000 simulated conpats of same length and degeneracy.
Upstream vs Downstream - conpat occurs preferentially upstream or downstream of genes. Pvalue assigned by binomial distribution (# upstream occurrence, total occurrences, background probability=0.56). Background probability based on HCS distribution.
Category Enrichment - conpat occurs preferentially near genes having related functional categories. Pvalue for each category C assigned by hypergeometric distribution (# co-occurrences upstream of genes in category C, total # co-occurrences, # all genes in category C, # all genes) with the Bonferroni correction for multiple testing.
Cell Location Enrichment - conpat occurs preferentially near genes having related cellular location, based on the GO cell location category for the A. nidulans gene's best bi-directional hit (BBH) to S. cerevisiae. Pvalue for each category C assigned by hypergeometric distribution (# co-occurrences upstream of genes in category C, total # co-occurrences, # all genes in category C, # all genes) wi…
Definitions:
Three-way orthologs: Pairwise orthologs are defined as best bidirectional hits (within all-vs-all comparison of genome protein sets) using blastp (e<1e-5) and requiring > 60% coverage of each gene. Three-way orthologs are sets (A,B,C) where (A,B), (B,C), and (A,C) are each pairwise orthologs.
Tabs:
conpats: 69 conpats showed co-occurrence enrichment (p < 0.01) and either upstream or downstream preference (p < 0.01).
conpat_sites: sites of co-occurring conpats, 2 lines per ortholog (for upstream co-occurring conpats, and downstream co-occurring conpats)
conpat_matrices.ace: conpat matrix in ACE file format (multiple alignment HCS subsequences). X=any nucleotide.
factors: sequences of known factors used in similarity searches
an_cats: for all three-way orthologs, the A. nidulans locus, description, COG category, yeast best bi-directional hit (BBH), yeast GO cellular location category
top35: the top 35 conpats sorted by the number of HCS
Data fields:
conpats tab:
ID: unique conpat identifier.
Conpat Consensus: sequence logo (generated by WebLogo program [Crooks GE et all, Genome Research, 2004]) based on HCS multiple alignment.
Similar Sequence: name of known factor with a similar binding sequence, based on CompareACE score > 0.85. Set of known factors in tab "factors".
# HCS: number of HCS blocks clustered together to generate conpat
# 5' Sites: number of ortholog triplets (An, Af, Ao) that the conpat co-occurred upstream of. All ortholog triplets were aligned including 1000 bp upstream. If a neighboring gene is located within 1000bp upstream, the upstream non-coding alignment is split in half, otherwise the entire 1000bp upstream alignment is split in half.
# 3' Sites: number of ortholog triplets (An, Af, Ao) that the conpat co-occurred downstream of. All ortholog triplets were aligned including 1000 bp downstream. If a neighboring gene is located within 1000bp downstream, the downstream non-coding alignment is split in half, otherwise the entire 1000bp downstream alignment is split in half.
5' /3' Bias? "up" indicates that the conpat preferentially occurrs upstream of genes (pvalue < 0.01 based on binomial distribution). "down" indicates a downstream preference.
% Aligned: percent of upstream co-occurrences that overlap an HCS (if 5'/3' bias="up", use downstream co-occurrences otherwise).
Strand Bias? "yes" indicates that the conpat co-occurred more often on the + strand (same strand as gene) than on the - strand (binomial distribution, pvalue < 0.01). "no" indicates that no such preference was observed. Note: there will be no preference for reverse-complement palindrome conpats.
Sites/Gene: average number of times a conpat is found upstream of the gene (if 5'/3' bias = "up") or downstream of the gene (if 5'/3' bias = "down").
Enriched in COG categories: categories showing enrichment (pvalue < 0.01 as described above), after multiple category testing. The number of genes in this category are shown in parenthesis.
Enriched in cell location: categories showing enrichment (pvalue < 0.01 as described above), after multiple category testing. The number of genes in this category are shown in parenthesis.
Bits / Base: average number of information content bits contained in the weight matrix.
Conpat Consensus: ASCII representation of the conpat weight matrix. BE VERY CAREFUL if you use this as it's much better to use the underlying weight matrix representation (see conpat_matrices.ace). The ASCII representation has capital letters representing bases with > 1 bit of information from the weight matrix, and lowercase degenerate code letters for the bases < 1 bit of information content.
conpat_sites tab:
conpat ID: unique conpat identifier.
Conpat Consensus: see above
Similar Sequence: see above
conpat 5' / 3' Bias: upsteam/downstream bias of the conpat, see above
Site 5' / 3' of Locus: "up" if the site is upstream of the given gene, "down" if the site is downstream of the given gene
AF Locus: locus of the A. fumigatus ortholog
AN Locus: locus of the A. nidulans ortholog
AO Locus: locus of the A. oryzae ortholog
Locus Description: name of the A. nidulans locus
COG Category: COG category for AN locus (multiple letters indicate locus is in multiple categories)
COG Cat Enriched: 1 if the conpat in enriched in this category (p<0.01)
COG Cat Pval: pvalue for the category enrichment (one per letter if multiple COG cats). Note pvalue may be > 1 since it's multiplied by the number of tested categories (Bonferonni correction).
# AF sites: number of conpat sites upstream/downstream of this gene in A. fumigatus
# AN sites: number of conpat sites upstream/downstream of this gene in A. nidulans
# AO sites: number of conpat sites upstream/downstream of this gene in A. oryzae
Overlap HCS: 1 if any of the sites overlaps an HCS
AF dist from gene: if "Site 5'/3' of Locus"="up", then the distance from the end of the conpat to the gene start in A. fumigatus. Otherwise, distance from the gene stop to the conpat start.
AN dist from gene: if "Site 5'/3' of Locus"="up", then the distance from the end of the conpat to the gene start in A. nidulans. Otherwise, distance from the gene stop to the conpat start.
AO dist from gene: if "Site 5'/3' of Locus"="up", then the distance from the end of the conpat to the gene start in A. oryzae. Otherwise, distance from the gene stop to the conpat start.
AN 5' UTR Len: if "Site 5'/3' of Locus"="up", then report the length of the EST alignment that overlaps a gene to the 5' end (indicating a lowerbound for the 5' UTR length) or "No EST" if no EST aligns to this gene. NOTE: just the maximum aligned length is given and introns may be present within the 5' UTR.
In AN 5' UTR: 1 if "AN 5' UTR Len">0 and the "AN dist from gene" < "AN 5' UTR Len"
AN 3' UTR Len: if "Site 5'/3' of Locus"="down", then report the length of the EST alignment that overlap a gene to the 3' end (indicating a 3' UTR) or "No EST" if no EST aligns downstream of this gene
In AN 3' UTR: 1 if "AN 3' UTR Len">0 and the "AN dist from gene" < "AN 3' UTR Len"

## Sheet: conpats
ID	Conpat Consensus	Similar Sequence	# HCS	# 5' Sites	# 3' Sites	5' /3' Bias?	% Aligned	Strand Bias?	Sites/Gene	Enriched in COG categories (# genes in category)	Enriched in cell location (# genes in category)	Bits / Base	Conpat Consensus
1821		bHLH	36	115	8	up³	0.35	yes³	1.06	J:Translation, ribosomal structure, biogenesis (16)¹	nucleus (22)	1.85029	TCACGTG
1622		areA/gln3	19	25	3	up¹	0.6		1.08		nucleus (8)	1.64023	ATCTTATC
234			17	46	11	up²	0.35		1.2	A:RNA processing, modification (8)		1.34382	GTTTGTCnTGTTTG
1934		bHLH	16	36	3	up³	0.47	yes¹	1.12	I:Lipid transport, metabolism (10)²		1.76273	TCACATGA
1710		puf3	16	5	20	down¹	0.3	yes³	1.03			1.58055	TGTATATA
896			15	14	2	up	0.43	yes	1.02			1.6	TGGTCCGTGC
1602			14	34	0	up³	0.5		1.06		nucleolus (4)	1.7791	AGGCGGT
1879			13	24	1	up²	0.63	yes	1.07			1.82891	CTTATCGAT
1132			12	14	2	up	0.36	yes³	1.1			1.59069	CCCCTCT
2683			10	27	1	up³	0.48	yes¹	1.07			1.71328	TCTCCGC
2223			9	5	16	down	0.63	yes³	1.04			1.82869	GGCGTTG
1291		yAP1	9	21	1	up²	0.62	yes	1.11			1.81469	TGAGTCAG
992			9	1	21	down³	0.86	yes³	1.14			1.8043	GCATAGCG
2611			9	0	17	down³	0.59		1.08			1.7874	TGTACAT
1739			9	9	0	up	0.44	yes¹	1.19	J:Translation, ribosomal structure, biogenesis (4)		1.51629	GGGCTTAGGG
418			9	33	1	up³	0.45		1.15			1.39768	CAAACAGTGCAAA
2077		puf3	9	1	9	down	0.56	yes	1		mitochondrion (4)¹	1.31	TGTACAAATA
973			8	74	6	up³	0.36	yes¹	1.14	A:RNA processing, modification (12)¹	nucleolus (8)²	1.80129	CACCGCCT
2488			8	37	4	up³	0.38	yes²	1.11	T:Signal transduction mechanisms (11)²	cytoplasm (13)¹	1.7	TACCCCGC
1144		puf3	8	2	11	down	0.36	yes³	1.27		mitochondrion (6)³	1.68111	TGTACTAT
1635			8	13	1	up	0.69	yes³	1.15	J:Translation, ribosomal structure, biogenesis (8)³	cytoplasm (8)²	1.59092	CGACAACCC
1940			8	2	19	down²	0.47	yes³	1.18	D:Cell cycle/division, chrom. partitioning (5)¹		1.37096	GTbGGCGTT
2199		bHLH	7	40	3	up³	0.3		1.04			1.775	CCACGTGC
1426			7	14	1	up	0.5		1.02	C:Energy production, conversion (5)¹		1.65213	CCCGAGGT
2525		stuA/mbp1	6	18	1	up¹	0.39	yes	1.33	L:Replication, recombination, repair (10)³	nucleus (8)¹	1.88923	GACGCGT
813		yATF-B	6	11	1	up	0.45		1.06			1.80097	ACGTCAC
1650			6	11	0	up	0.73		1.12	J:Translation, ribosomal structure, biogenesis (4)	nucleolus (4)²	1.69138	GAAATTT
2093			6	44	5	up³	0.3	yes³	1.11	I:Lipid transport, metabolism (8)		1.68826	CCCCGCAC
1998			6	25	1	up³	0.4	yes	1.03	I:Lipid transport, metabolism (7)¹	peroxisome (2)¹	1.65	CCTCGGCA
2497			6	0	8	down	1	yes²	1.04			1.58163	TGCATAG
751			6	25	2	up²	0.4		1.07			1.56	ACCGCCTTCC
2483		cpcA/gcn4	5	19	4	up	0.26		1.16	E:Amino acid transport, metabolism (7)¹ J:Translation, ribosomal structure, biogenesis (7)²	cytoplasm (12)³	2	TGAGTCA
2249			5	36	0	up³	0.25		1.17	A:RNA processing, modification (7) J:Translation, ribosomal structure, biogenesis (13)³	nucleolus (8)³ nucleus (12)¹	1.94274	TTTTTTT
1059			5	12	1	up	0.92		1.06			1.875	TCGGCCCG
2451			5	0	10	down¹	0.8		1		cell periphery (2)	1.86216	GATATCC
2677			5	34	6	up²	0.62	yes³	1.08			1.81808	TCACCGC
1723			5	18	2	up	0.5		1.04			1.72191	TCTCGTGA
2919			5	53	2	up³	0.3	yes³	1.07		cytoplasm (16)	1.72087	TCCCCGC
1581			5	1	8	down	0.38	yes³	1			1.69154	TGCATATA
2215			5	1	10	down	0.4	yes³	1.07			1.69099	ATTCCCC
252			5	12	0	up¹	0.25		1.06			1.63307	ACGCGTAAAGTGGTT
2032			5	18	1	up¹	0.39		1.11	O:Posttranslational modification/turnover/chaperones (7)¹		1.58639	GAAGCTCTC
1971			5	11	1	up	0.82		1.12			1.50799	CGCCGGCCG
1872			5	0	13	down²	0.69	yes	1			1.48113	TATGATAC
1093			5	83	6	up³	0.16	yes³	1.44		cytoplasm (26)² nucleus (17)	1.46923	CCCCTCCCCC
1453			5	4	12	down	0.33		1.08			1.45613	TTTGGTCTT
855			5	12	1	up	0.58	yes	1.22			1.448	TTCCGCCCGC
2194			5	2	14	down¹	0.21	yes³	1.02			1.42872	GGvGTTTGGAG
616			5	19	1	up¹	0.37		1.04	L:Replication, recombination, repair (7)³		1.35714	CGCGAAdTCACGTG
652			5	263	32	up³	0.08	yes³	1.92	C:Energy production, conversion (24)	cytoplasm (50)	1.33258	CTCTCCTTCTCCCC
45			5	400	243	up¹	0.03	yes³	1.89		cytoplasm (75)¹	1.27196	TTTCTTTTTCTTTTTTTT
2662			4	2	25	down³	0.56	yes³	1.03			1.925	GAGATACC
2253			4	1	8	down	0.5		1.12			1.875	TTTGGTTT
2529			4	30	2	up³	0.3	yes	1.03			1.78571	ACGTGAC
1230			4	14	1	up	0.29	yes³	1.05			1.71468	TTACCCCTC
2236			4	18	2	up	0.67		1.04		late Golgi (2) nucleolus (5)²	1.6875	GCAGAATC
1407			4	40	3	up³	0.3	yes	1.07	J:Translation, ribosomal structure, biogenesis (9)¹		1.64444	CCCGTGACT
1475			4	24	53	down³	0.26	yes³	1.55			1.63673	TTTCCTTT
328			4	3	12	down	0.83	yes³	1.14			1.62642	GCATAGCATGGCGT
2287			4	33	0	up³	0.06	yes³	1.28			1.58889	TTCTTCCTT
843			4	13	1	up	0.38		1			1.53799	TGAGCCTCGG
2378		puf3	4	2	11	down	0.73	yes¹	1.03		mitochondrion (4)	1.52222	TGTACAGAA
347			4	15	1	up	0.47		1.04	J:Translation, ribosomal structure, biogenesis (5)	nucleolus (4)¹	1.49919	wmAAAAGTTC
1183			4	22	4	up	0.59		1.08			1.48149	AAACAAGGCA
344			4	14	2	up	0.5		1.05			1.45007	GGCAAAATdAAC
336			4	4	31	down³	0.23	yes³	1.14	K:Transcription (7)		1.39507	GGCGTTTGGG
698			4	121	16	up³	0.1	yes³	1.66		mitochondrion (13) cytoplasm (27)	1.33077	CCCTCCATCTCCA
233			4	108	36	up³	0.06	yes³	1.64	C:Energy production, conversion (14)	mitochondrion (12)	1.32368	TCTCCTTTCCTCyC
1270			4	26	5	up¹	0.12	yes³	1.31			1.31818	CTTTTCCGTCC
Similar sequence determined comparing pattern with known factors in yeast and Aspergillus via CompareACE (score cutoff 0.85)
Pvalues indicated by superscript: ¹pvalue < 1e-3, ²pvalue < 1e-4, ³pvalue < 1e-5

## Sheet: conpat_sites
Pattern ID	Conpat Consensus	Similar Sequence	Pattern 5' / 3' Bias	Site 5' / 3' of Locus	AF Locus	AN Locus	AO Locus	Locus Description	COG Category	COG Cat Enriched	COG Cat Pval	# AF sites	# AN sites	# AO sites	Overlap HCS	AF Dist to Gene	AN Dist to Gene	AO Dist to Gene	AN 5' UTR Len	In AN 5' UTR	AN 3' UTR Len	In AN 3' UTR
45	TTTCTTTTTCTTTTTTTT		up	down	71.m16041	AN0047.1	AO070314000125	GTP-binding protein GP-1				1	3	3	0	44	53	110			272	1
45	TTTCTTTTTCTTTTTTTT		up	down	71.m15325	AN0056.1	AO070314000131	hypothetical protein [Neurospora crassa]				1	2	3	0	98	205	8			No EST	No EST
45	TTTCTTTTTCTTTTTTTT		up	down	71.m15359	AN0081.1	AO070311000136	G-protein beta subunit				3	2	3	0	61	282	14			No EST	No EST
45	TTTCTTTTTCTTTTTTTT		up	down	71.m15366	AN0091.1	AO070311000124	Putative protein methyltransferase involved in meiosis and transcriptional silencing (Dot1)	DK		0.939027978679397 4.15828392190872	1	1	2	0	207	66	182			No EST	No EST
45	TTTCTTTTTCTTTTTTTT		up	down	71.m15386	AN0111.1	AO070311000109	mRNA splicing factor	A		1.2493	1	1	1	0	276	74	146			No EST	No EST
45	TTTCTTTTTCTTTTTTTT		up	up	54.m06496	AN0266.1	AO070334000087	Splicing factor, arginine/serine-rich	A		1.2493	1	2	1	0	28	53	64	No EST	No EST
45	TTTCTTTTTCTTTTTTTT		up	up	70.m15437	AN0837.1	AO070255000006	Splicing coactivator SRm160/300, subunit SRm300	A		1.2493	2	2	2	0	24	214	89	No EST	No EST
45	TTTCTTTTTCTTTTTTTT		up	up	70.m15477	AN0874.1	AO070320000033	Poly(A) polymerase and related nucleotidyltransferases	A		1.2493	3	2	3	0	91	98	162	No EST	No EST
45	TTTCTTTTTCTTTTTTTT		up	up	70.m14844	AN1379.1	AO070243000010	mRNA export protein (contains WD40 repeats)	A		1.2493	1	1	1	0	12	210	245	135	0
45	TTTCTTTTTCTTTTTTTT		up	down	71.m16065	AN0182.1	AO070321000058	Ras-related GTPase				1	1	1	0	248	280	255			341	1
45	TTTCTTTTTCTTTTTTTT		up	up	58.m07773	AN1697.1	AO070305000021	Splicing coactivator SRm160/300, subunit SRm160 (contains PWI domain)	A		1.2493	3	1	2	0	96	441	115	No EST	No EST
45	TTTCTTTTTCTTTTTTTT		up	up	69.m15051	AN1750.1	AO070324000043	RNA helicase	A		1.2493	1	1	1	0	94	30	29	No EST	No EST
45	TTTCTTTTTCTTTTTTTT		up	up	58.m07347	AN1949.1	AO070342000215	ATP-dependent RNA helicase pitchoune	A		1.2493	1	2	1	0	78	111	309	51	0
45	TTTCTTTTTCTTTTTTTT		up	up	58.m07602	AN1992.1	AO070301000083	U4/U6.U5 snRNP associated protein	A		1.2493	1	1	2	1	226	144	124	No EST	No EST
45	TTTCTTTTTCTTTTTTTT		up	up	72.m19690	AN2151.1	AO070343000200	Splicing coactivator SRm160/300, subunit SRm300	A		1.2493	2	1	1	0	118	80	340	No EST	No EST
45	TTTCTTTTTCTTTTTTTT		up	up	59.m08713	AN2868.1	AO070338000154	Oligoribonuclease (3'->5' exoribonuclease)	A		1.2493	1	1	1	0	115	377	187	No EST	No EST
45	TTTCTTTTTCTTTTTTTT		up	up	69.m14962	AN3958.1	AO070341000080	DNA alkylation damage repair protein	A		1.2493	1	1	2	0	237	91	13	64	0
45	TTTCTTTTTCTTTTTTTT		up	down	54.m06491	AN0293.1	AO070334000049	Predicted acetyltransferases and hydrolases with the alpha/beta hydrolase fold				1	1	1	0	12	14	137			No EST	No EST
45	TTTCTTTTTCTTTTTTTT		up	down	54.m06459	AN0302.1	AO070334000037	Nucleolar GTPase/ATPase p130	Y		0.123291	6	5	2	1	71	109	151			No EST	No EST
45	TTTCTTTTTCTTTTTTTT		up	up	54.m06765	AN4206.1	AO070231000018	Splicing coactivator SRm160/300, subunit SRm300	A		1.2493	1	1	1	0	79	40	122	34	0
45	TTTCTTTTTCTTTTTTTT		up	up	58.m08025	AN4298.1	AO070189000008	U3 small nucleolar ribonucleoprotein (snoRNP) subunit - Mpp10p	A		1.2493	2	1	1	0	65	164	65	143	0
45	TTTCTTTTTCTTTTTTTT		up	down	54.m06392	AN0359.1	AO070318000037	Translation initiation factor 3, subunit b (eIF-3b)	J		0.203093	1	2	1	0	44	4	31			No EST	No EST
45	TTTCTTTTTCTTTTTTTT		up	up	71.m15682	AN4696.1	AO070329000189	Splicing coactivator SRm160/300, subunit SRm300	A		1.2493	2	2	1	0	243	209	102	No EST	No EST
45	TTTCTTTTTCTTTTTTTT		up	up	72.m19952	AN5931.1	AO070340000344	ATP-dependent RNA helicase	A		1.2493	4	4	4	0	121	67	57	111	1
45	TTTCTTTTTCTTTTTTTT		up	down	54.m06638	AN0446.1	AO070338000308	Uncharacterized protein PSP1 (suppressor of DNA polymerase alpha mutations in yeast)				1	3	3	0	190	130	230			No EST	No EST
45	TTTCTTTTTCTTTTTTTT		up	up	65.m07245	AN6725.1	AO070339000169	Protein involved in mRNA turnover and stability	A		1.2493	1	1	1	1	144	40	47	45	1
45	TTTCTTTTTCTTTTTTTT		up	down	54.m06605	AN0463.1	AO070328000174	Signaling protein DOCK180	T		0.088765	1	2	3	0	113	47	27			No EST	No EST
45	TTTCTTTTTCTTTTTTTT		up	up	53.m03883	AN8034.1	AO070322000125	Splicing coactivator SRm160/300, subunit SRm300	A		1.2493	2	2	3	0	107	177	297	No EST	No EST
45	TTTCTTTTTCTTTTTTTT		up	up	53.m03908	AN8038.1	AO070330000008	mRNA cleavage and polyadenylation factor I complex, subunit RNA15	A		1.2493	2	1	3	0	280	22	25	No EST	No EST
45	TTTCTTTTTCTTTTTTTT		up	up	53.m03926	AN8073.1	AO070330000031	tRNA and rRNA cytosine-C5-methylase (nucleolar protein NOL1/NOP2)	A		1.2493	1	1	2	0	78	20	13	8	0
45	TTTCTTTTTCTTTTTTTT		up	down	69.m15281	AN0565.1	AO070272000043	Multifunctional pyrimidine synthesis protein CAD (includes carbamoyl-phophate synthetase, aspartate transcarbamylase, and glutamine amidotransferase)				3	3	3	1	68	84	84			No EST	No EST
45	TTTCTTTTTCTTTTTTTT		up	up	59.m09109	AN4862.1	AO070329000148	Ran GTPase-activating protein	AYT		1.24930147251137 0.123290877849902 0.0887649648758591	2	1	2	0	20	152	68	No EST	No EST
45	TTTCTTTTTCTTTTTTTT		up	down	69.m15270	AN0575.1	AO070272000054	Calmodulin-binding protein CRAG, contains DENN domain	T		0.088765	2	1	2	0	150	202	112			No EST	No EST
45	TTTCTTTTTCTTTTTTTT		up	up	72.m19479	AN2426.1	AO070241000005	Histone H4	B		6.72132	1	1	1	0	116	383	410	No EST	No EST
45	TTTCTTTTTCTTTTTTTT		up	up	59.m08719	AN2871.1	AO070338000143	SWI-SNF chromatin-remodeling complex protein	B		6.72132	4	3	4	0	42	110	208	No EST	No EST
45	TTTCTTTTTCTTTTTTTT		up	down	70.m15648	AN0634.1	AO070318000124	GTP-binding ADP-ribosylation factor-like protein yARL3	U		3.41752	1	1	1	0	185	66	117			No EST	No EST
45	TTTCTTTTTCTTTTTTTT		up	up	53.m04190	AN8042.1	AO070330000004	Histone deacetylase complex, catalytic component HDA1	B		6.72132	2	2	1	0	92	242	306	No EST	No EST
45	TTTCTTTTTCTTTTTTTT		up	up	70.m14994	AN1226.1	AO070331000235	Sirtuin 5 and related class III sirtuins (SIR2 family)	BK		6.72131997613286 4.15828392190872	1	1	2	0	47	152	94	No EST	No EST
45	TTTCTTTTTCTTTTTTTT		up	down	70.m15259	AN0655.1	AO070343000571	hypothetical protein [Neurospora crassa]				1	5	4	0	156	102	19			No EST	No EST
45	TTTCTTTTTCTTTTTTTT		up	down	70.m15267	AN0664.1	AO070343000556	Phosphoinositide-specific phospholipase C	T		0.088765	2	3	3	0	57	89	175			No EST	No EST
45	TTTCTTTTTCTTTTTTTT		up	up	70.m15494	AN0888.1	AO070320000057	Uncharacterized conserved protein, contains JmjC domain	BT		6.72131997613286 0.0887649648758591	1	1	1	0	122	157	87	No EST	No EST
45	TTTCTTTTTCTTTTTTTT		up	up	69.m15252	AN0595.1	AO070280000021	NADP/FAD dependent oxidoreductase	C		0.327087	2	3	2	0	51	218	420	No EST	No EST
45	TTTCTTTTTCTTTTTTTT		up	up	70.m15785	AN0775.1	AO070316000063	Glyoxylate/hydroxypyruvate reductase (D-isomer-specific 2-hydroxy acid dehydrogenase superfamily)	C		0.327087	1	1	2	0	104	196	232	87	0
45	TTTCTTTTTCTTTTTTTT		up	down	70.m15316	AN0709.1	AO070343000497	FOG: Zn-finger				1	1	2	0	412	309	385			731	1
45	TTTCTTTTTCTTTTTTTT		up	up	70.m15456	AN0870.1	AO070320000023	Mitochondrial phosphate carrier protein	C		0.327087	2	1	2	0	57	438	27	15	0
45	TTTCTTTTTCTTTTTTTT		up	down	70.m15319	AN0734.1	AO070343000495	Histone H4	B		6.72132	2	1	1	0	6	6	8			342	1
45	TTTCTTTTTCTTTTTTTT		up	down	70.m15349	AN0751.1	AO070343000448	predicted protein [Neurospora crassa]				1	1	2	0	33	360	77			No EST	No EST
45	TTTCTTTTTCTTTTTTTT		up	up	70.m15137	AN1094.1	AO070285000053	NADH-dehydrogenase (ubiquinone)	C		0.327087	3	2	3	0	32	122	69	No EST	No EST
45	TTTCTTTTTCTTTTTTTT		up	up	55.m03061	AN1543.1	AO070339000311	Fumarate reductase, flavoprotein subunit	C		0.327087	2	1	2	0	31	314	227	43	0
45	TTTCTTTTTCTTTTTTTT		up	up	55.m03067	AN1547.1	AO070339000307	Acetyl-CoA hydrolase	C		0.327087	3	2	4	0	52	352	42	No EST	No EST
45	TTTCTTTTTCTTTTTTTT		up	up	58.m07694	AN1624.1	AO070299000090	Mitochondrial F1F0-ATP synthase, subunit c/ATP9/proteolipid	C		0.327087	2	3	2	0	45	356	325	79	0
45	TTTCTTTTTCTTTTTTTT		up	up	69.m15053	AN1752.1	AO070324000041	NADP/FAD dependent oxidoreductase	C		0.327087	1	2	1	0	51	51	77	No EST	No EST
45	TTTCTTTTTCTTTTTTTT		up	down	70.m15424	AN0823.1	AO070255000022	Uncharacterized conserved protein				1	1	1	0	32	25	49			233	1
45	TTTCTTTTTCTTTTTTTT		up	up	57.m05769	AN2069.1	AO070341000218	Cytochrome b5	C		0.327087	1	2	3	0	360	125	134	No EST	No EST
45	TTTCTTTTTCTTTTTTTT		up	up	71.m15944	AN2295.1	AO070295000075	Succinyl-CoA synthetase, alpha subunit	C		0.327087	1	1	1	0	17	164	159	137	0
45	TTTCTTTTTCTTTTTTTT		up	down	70.m15445	AN0846.1	AO070216000005	predicted protein [Neurospora crassa]				1	1	1	0	69	150	148			No EST	No EST
45	TTTCTTTTTCTTTTTTTT		up	down	70.m15449	AN0849.1	AO070216000008	Dystonin, GAS (Growth-arrest-specific protein), and related proteins	Z		5.80102	1	2	2	0	268	171	118			No EST	No EST
45	TTTCTTTTTCTTTTTTTT		up	down	70.m15453	AN0854.1	AO070320000001	Splicing coactivator SRm160/300, subunit SRm300	A		1.2493	2	1	1	0	65	53	41			308	1
45	TTTCTTTTTCTTTTTTTT		up	up	71.m15519	AN2315.1	AO070323000037	F0F1-type ATP synthase, beta subunit	C		0.327087	1	2	2	1	60	307	340	104	0
45	TTTCTTTTTCTTTTTTTT		up	up	69.m15223	AN2435.1	AO070264000043	ATP-citrate lyase	C		0.327087	3	2	3	0	24	154	247	187	1
45	TTTCTTTTTCTTTTTTTT		up	up	54.m06583	AN4007.1	AO070328000146	Succinyl-CoA:alpha-ketoacid-CoA transferase	C		0.327087	1	1	2	0	73	309	234	No EST	No EST
45	TTTCTTTTTCTTTTTTTT		up	up	58.m07847	AN4462.1	AO070305000113	Pyruvate carboxylase	C		0.327087	3	3	2	0	271	34	305	No EST	No EST
45	TTTCTTTTTCTTTTTTTT		up	up	58.m07480	AN5534.1	AO070328000057	Glyoxylate/hydroxypyruvate reductase (D-isomer-specific 2-hydroxy acid dehydrogenase superfamily)	C		0.327087	2	1	1	0	46	182	143	No EST	No EST
45	TTTCTTTTTCTTTTTTTT		up	up	58.m07331	AN5634.1	AO070342000238	Isocitrate lyase	C		0.327087	2	1	2	0	146	348	360	No EST	No EST
45	TTTCTTTTTCTTTTTTTT		up	up	62.m03114	AN6525.1	AO070270000024	Glyoxylate/hydroxypyruvate reductase (D-isomer-specific 2-hydroxy acid dehydrogenase superfamily)	C		0.327087	1	2	1	0	227	135	43	No EST	No EST
45	TTTCTTTTTCTTTTTTTT		up	down	70.m15490	AN0891.1	AO070320000062	Positive regulator of purine utilization				1	1	1	0	16	3	181			No EST	No EST
45	TTTCTTTTTCTTTTTTTT		up	down	70.m15508	AN0899.1	AO070320000073	Nucleolar GTPase/ATPase p130	Y		0.123291	1	3	4	1	165	3	34			7	1
45	TTTCTTTTTCTTTTTTTT		up	up	62.m03250	AN6650.1	AO070269000001	Citrate synthase	C		0.327087	2	1	2	0	33	382	162	No EST	No EST
45	TTTCTTTTTCTTTTTTTT		up	down	70.m15522	AN0913.1	AO070320000094	Phosphatidylinositol synthase	I		3.91278	1	1	2	0	375	313	169			No EST	No EST
45	TTTCTTTTTCTTTTTTTT		up	up	65.m07257	AN6717.1	AO070339000157	NAD-dependent malate dehydrogenase	C		0.327087	2	1	3	0	37	160	141	No EST	No EST
45	TTTCTTTTTCTTTTTTTT		up	up	53.m03685	AN8275.1	AO070310000026	Citrate synthase	C		0.327087	1	1	2	0	76	77	89	73	0
45	TTTCTTTTTCTTTTTTTT		up	up	62.m03362	AN8707.1	AO070315000134	Fumarase	C		0.327087	4	1	1	0	62	113	54	89	0
45	TTTCTTTTTCTTTTTTTT		up	down	70.m15808	AN0926.1	AO070320000110	Nuclear transport receptor Karyopherin-beta2/Transportin (importin beta superfamily)	YU		0.123290877849902 3.41751618934886	2	1	2	0	93	113	98			No EST	No EST
45	TTTCTTTTTCTTTTTTTT		up	up	62.m03322	AN8755.1	AO070250000017	Isocitrate lyase	C		0.327087	2	1	2	0	32	237	295	No EST	No EST
45	TTTCTTTTTCTTTTTTTT		up	down	70.m15535	AN0928.1	AO070320000113	hypothetical protein ( (AL451014) putative protein [Neurospora crassa] )				1	1	1	0	42	7	22			No EST	No EST
45	TTTCTTTTTCTTTTTTTT		up	up	65.m07308	AN8785.1	AO070289000010	Mitochondrial aspartate/glutamate carrier protein Aralar/Citrin (contains EF-hand Ca2+-binding domains)	C		0.327087	2	4	6	0	64	15	2	No EST	No EST
45	TTTCTTTTTCTTTTTTTT		up	down	70.m15600	AN0953.1	AO070320000154	Predicted small GTPase involved in nuclear protein import	U		3.41752	1	2	1	0	312	232	367			35	0
45	TTTCTTTTTCTTTTTTTT		up	up	52.m04030	AN9403.1	AO070274000014	Pyruvate dehydrogenase E1, beta subunit	C		0.327087	1	1	1	0	25	317	207	101	0
45	TTTCTTTTTCTTTTTTTT		up	down	70.m15609	AN0973.1	AO070320000174	FOG: Zn-finger				2	1	2	0	11	152	172			No EST	No EST
45	TTTCTTTTTCTTTTTTTT		up	down	70.m15619	AN0979.1	AO070320000183	Nucleolar GTPase/ATPase p130	Y		0.123291	1	3	2	0	269	27	23			No EST	No EST
45	TTTCTTTTTCTTTTTTTT		up	up	54.m07025	AN3894.1	AO070324000132	Aconitase/homoaconitase (aconitase superfamily)	CE		0.327086752378182 0.255777139620395	1	1	1	0	73	172	209	No EST	No EST
45	TTTCTTTTTCTTTTTTTT		up	up	69.m15433	AN5525.1	AO070341000364	Aconitase/homoaconitase (aconitase superfamily)	CE		0.327086752378182 0.255777139620395	1	1	2	0	144	344	387	111	0
45	TTTCTTTTTCTTTTTTTT		up	down	70.m15214	AN0997.1	AO070312000043	Ribonuclease III domain proteins	J		0.203093	1	1	2	0	165	139	173			120	0
45	TTTCTTTTTCTTTTTTTT		up	up	70.m15237	AN1019.1	AO070343000596	Cullins	D		0.939028	2	2	2	0	133	157	94	69	0
45	TTTCTTTTTCTTTTTTTT		up	down	70.m15234	AN1016.1	AO070312000002	G-protein alpha subunit (small G protein superfamily)	DT		0.939027978679397 0.0887649648758591	1	2	3	0	283	117	110			No EST	No EST
45	TTTCTTTTTCTTTTTTTT		up	up	72.m19677	AN2163.1	AO070343000222	Mitotic spindle checkpoint protein	D		0.939028	1	1	4	0	301	104	63	242	1
45	TTTCTTTTTCTTTTTTTT		up	up	71.m15961	AN8830.1	AO070271000049	Checkpoint kinase and related serine/threonine protein kinases	D		0.939028	1	2	1	0	155	74	38	121	1
45	TTTCTTTTTCTTTTTTTT		up	down	70.m15197	AN1039.1	AO070336000074	HLH transcription factor EBF/Olf-1 and related DNA binding proteins	K		4.15828	2	2	3	0	11	131	8			No EST	No EST
45	TTTCTTTTTCTTTTTTTT		up	up	70.m15290	AN0687.1	AO070343000527	Spermidine synthase	E		0.255777	4	2	2	0	27	377	272	123	0
45	TTTCTTTTTCTTTTTTTT		up	up	70.m15221	AN1003.1	AO070312000031	Isocitrate dehydrogenase, alpha subunit	E		0.255777	2	2	1	0	47	174	197	48	0
45	TTTCTTTTTCTTTTTTTT		up	up	70.m15165	AN1073.1	AO070218000012	H+/oligopeptide symporter	E		0.255777	3	2	2	0	34	252	233	No EST	No EST
45	TTTCTTTTTCTTTTTTTT		up	down	70.m15191	AN1052.1	AO070336000059	von Willebrand factor and related coagulation proteins	V		9.30761	2	1	1	0	137	205	165			368	1
45	TTTCTTTTTCTTTTTTTT		up	up	55.m02926	AN1429.1	AO070242000022	Choline dehydrogenase and related flavoproteins	E		0.255777	1	1	3	0	215	410	315	48	0
45	TTTCTTTTTCTTTTTTTT		up	up	55.m02949	AN1446.1	AO070302000003	Cystathionine beta-lyases/cystathionine gamma-synthases	E		0.255777	1	1	3	0	55	181	143	214	1
45	TTTCTTTTTCTTTTTTTT		up	up	58.m07723	AN1631.1	AO070299000043	Amino acid transporters	E		0.255777	3	1	3	0	300	153	34	No EST	No EST
45	TTTCTTTTTCTTTTTTTT		up	up	69.m15036	AN1733.1	AO070324000063	Delta-1-pyrroline-5-carboxylate dehydrogenase	E		0.255777	1	2	2	0	48	213	108	No EST	No EST
45	TTTCTTTTTCTTTTTTTT		up	down	70.m15138	AN1093.1	AO070285000054	Vacuolar sorting protein VPS1, dynamin, and related proteins	U		3.41752	2	1	1	0	30	1	258			No EST	No EST
45	TTTCTTTTTCTTTTTTTT		up	up	58.m07598	AN1990.1	AO070301000078	Alpha-isopropylmalate synthase/homocitrate synthase	E		0.255777	1	1	1	0	408	265	185	No EST	No EST
45	TTTCTTTTTCTTTTTTTT		up	down	70.m15137	AN1094.1	AO070285000053	NADH-dehydrogenase (ubiquinone)	C		0.327087	4	1	4	0	119	125	83			569	1
45	TTTCTTTTTCTTTTTTTT		up	up	58.m07603	AN1993.1	AO070301000084	Aspartate aminotransferase/Glutamic oxaloacetic transaminase AAT1/GOT2	E		0.255777	2	1	3	0	77	430	101	No EST	No EST
45	TTTCTTTTTCTTTTTTTT		up	up	71.m15836	AN2229.1	AO070326000151	Homoserine acetyltransferase	E		0.255777	1	1	1	0	96	61	54	No EST	No EST
45	TTTCTTTTTCTTTTTTTT		up	down	70.m15119	AN1116.1	AO070331000108	Transcription regulator XNP/ATRX, DEAD-box superfamily	K		4.15828	2	1	3	0	24	232	51			50	0
45	TTTCTTTTTCTTTTTTTT		up	down	70.m15114	AN1126.1	AO070331000119	GTP-binding ADP-ribosylation factor Arf1	U		3.41752	1	2	2	0	171	173	165			286	1
45	TTTCTTTTTCTTTTTTTT		up	up	59.m08957	AN3058.1	AO070337000016	Glycine/serine hydroxymethyltransferase	E		0.255777	2	1	2	0	77	392	111	66	0
45	TTTCTTTTTCTTTTTTTT		up	down	70.m15054	AN1166.1	AO070331000160	60s ribosomal protein L6	J		0.203093	1	1	1	0	282	265	259			No EST	No EST
45	TTTCTTTTTCTTTTTTTT		up	up	67.m02904	AN3304.1	AO070274000035	Amino acid transporters	E		0.255777	1	1	1	0	52	329	65	No EST	No EST
45	TTTCTTTTTCTTTTTTTT		up	up	66.m04660	AN3359.1	AO070317000081	Amino acid transporters	E		0.255777	1	1	2	0	207	248	134	23	0
45	TTTCTTTTTCTTTTTTTT		up	down	70.m15040	AN1177.1	AO070331000173	Vesicle coat complex COPI, beta subunit	U		3.41752	1	1	1	0	84	14	137			No EST	No EST
45	TTTCTTTTTCTTTTTTTT		up	up	58.m08894	AN4159.1	AO070342000188	Glutamine synthetase	E		0.255777	2	1	2	0	185	197	280	167	0
45	TTTCTTTTTCTTTTTTTT		up	up	58.m07953	AN4376.1	AO070261000018	Glutamate/leucine/phenylalanine/valine dehydrogenases	E		0.255777	3	1	2	0	73	384	331	100	0
45	TTTCTTTTTCTTTTTTTT		up	up	58.m07882	AN4443.1	AO070273000010	Methionine synthase II (cobalamin-independent)	E		0.255777	5	2	4	0	24	235	220	66	0
45	TTTCTTTTTCTTTTTTTT		up	up	59.m09156	AN4819.1	AO070327000168	Glutamine synthetase	E		0.255777	2	1	1	0	72	119	186	No EST	No EST
45	TTTCTTTTTCTTTTTTTT		up	up	54.m06889	AN5134.1	AO070291000041	Glutamate synthase	E		0.255777	2	1	1	0	262	309	209	No EST	No EST
45	TTTCTTTTTCTTTTTTTT		up	down	70.m14988	AN1231.1	AO070331000243	DNA polymerase IV (family X)	L		0.634944	1	1	1	0	304	18	317			No EST	No EST
45	TTTCTTTTTCTTTTTTTT		up	up	69.m14806	AN5790.1	AO070249000036	Isocitrate dehydrogenase, gamma subunit	E		0.255777	1	1	5	0	428	420	47	205	0
45	TTTCTTTTTCTTTTTTTT		up	down	70.m14963	AN1251.1	AO070214000014	FOG: Zn-finger				3	4	3	0	58	208	132			No EST	No EST
45	TTTCTTTTTCTTTTTTTT		up	down	70.m14969	AN1255.1	AO070223000014	Chromodomain-helicase DNA-binding protein	K		4.15828	2	2	2	0	69	186	16			No EST	No EST
45	TTTCTTTTTCTTTTTTTT		up	down	70.m14961	AN1258.1	AO070214000012	predicted protein [Neurospora crassa]				1	1	1	0	260	286	158			12	0
45	TTTCTTTTTCTTTTTTTT		up	up	72.m18963	AN5835.1	AO070260000010	Glycine/serine hydroxymethyltransferase	E		0.255777	2	1	3	0	65	439	221	No EST	No EST
45	TTTCTTTTTCTTTTTTTT		up	up	72.m19248	AN5883.1	AO070245000025	5,10-methylenetetrahydrofolate reductase	E		0.255777	1	1	2	0	381	136	103	No EST	No EST
45	TTTCTTTTTCTTTTTTTT		up	up	56.m02313	AN8903.1	AO070293000036	H+/oligopeptide symporter	E		0.255777	3	1	2	0	6	138	64	No EST	No EST
45	TTTCTTTTTCTTTTTTTT		up	up	53.m04148	AN9506.1	AO070266000019	Amino acid transporters	E		0.255777	2	1	2	0	69	255	121	51	0
45	TTTCTTTTTCTTTTTTTT		up	up	58.m07391	AN3591.1	AO070342000143	Methylmalonate semialdehyde dehydrogenase	EG		0.255777139620395 1.06815025630857	1	1	1	0	88	124	666	No EST	No EST
45	TTTCTTTTTCTTTTTTTT		up	up	62.m03251	AN6651.1	AO070269000002	ATPase component of ABC transporters with duplicated ATPase domains/Translation elongation factor EF-3b	EJ		0.255777139620395 0.203093081833132	2	2	3	0	233	283	288	No EST	No EST
45	TTTCTTTTTCTTTTTTTT		up	down	70.m15731	AN1358.1	AO070237000002	Serine/threonine protein phosphatase	T		0.088765	1	2	1	0	291	212	101			831	1
45	TTTCTTTTTCTTTTTTTT		up	up	65.m07309	AN0490.1	AO070321000178	CTP synthase (UTP-ammonia lyase)	F		2.25565	2	1	1	0	73	68	65	39	0
45	TTTCTTTTTCTTTTTTTT		up	up	57.m05527	AN4603.1	AO070267000024	Dihydroorotase and related enzymes	F		2.25565	1	2	3	0	21	307	129	No EST	No EST
45	TTTCTTTTTCTTTTTTTT		up	up	72.m19247	AN5884.1	AO070245000024	Uridine 5'- monophosphate synthase/orotate phosphoribosyltransferase	F		2.25565	1	3	2	0	138	106	147	No EST	No EST
45	TTTCTTTTTCTTTTTTTT		up	down	70.m14828	AN1394.1	AO070233000008	Septin CDC10 and related P-loop GTPases	DTZ		0.939027978679397 0.0887649648758591 5.80101679073153	1	1	1	0	206	103	122			356	1
45	TTTCTTTTTCTTTTTTTT		up	up	62.m03232	AN6637.1	AO070326000089	Glutamine phosphoribosylpyrophosphate amidotransferase	F		2.25565	2	2	4	0	144	25	2	415	1
45	TTTCTTTTTCTTTTTTTT		up	up	53.m03757	AN8216.1	AO070310000096	Nucleoside diphosphate kinase	F		2.25565	1	2	1	0	62	167	136	111	0
45	TTTCTTTTTCTTTTTTTT		up	up	66.m04541	AN9083.1	AO070332000196	Adenine phosphoribosyl transferases	F		2.25565	5	3	4	0	3	253	404	No EST	No EST
45	TTTCTTTTTCTTTTTTTT		up	down	55.m03263	AN1437.1	AO070232000002	hypothetical protein [Neurospora crassa]				2	1	3	0	68	99	37			No EST	No EST
45	TTTCTTTTTCTTTTTTTT		up	up	65.m07264	AN6711.1	AO070339000151	Ribose-phosphate pyrophosphokinase	FE		2.25564684014177 0.255777139620395	2	1	1	0	104	34	31	113	1
45	TTTCTTTTTCTTTTTTTT		up	up	69.m15460	AN5493.1	AO070341000392	Concentrative Na+-nucleoside cotransporter CNT1/CNT2	FP		2.25564684014177 1.35806928644389	1	1	1	0	156	264	29	No EST	No EST
45	TTTCTTTTTCTTTTTTTT		up	up	70.m15291	AN0688.1	AO070343000525	Transketolase	G		1.06815	5	1	4	0	47	330	172	66	0
45	TTTCTTTTTCTTTTTTTT		up	up	55.m02960	AN1457.1	AO070306000072	Permease of the major facilitator superfamily	G		1.06815	1	1	1	0	154	95	400	No EST	No EST
45	TTTCTTTTTCTTTTTTTT		up	down	55.m02969	AN1467.1	AO070306000090	Serine/threonine protein phosphatase	T		0.088765	1	1	2	0	291	6	178			No EST	No EST
45	TTTCTTTTTCTTTTTTTT		up	up	58.m07672	AN1827.1	AO070292000070	Chitinase	G		1.06815	1	1	2	0	61	341	532	No EST	No EST
45	TTTCTTTTTCTTTTTTTT		up	down	55.m02977	AN1475.1	AO070306000098	Cytoskeleton-associated protein and related proteins	Z		5.80102	0	1	1	0	356	152	366			392	1
45	TTTCTTTTTCTTTTTTTT		up	down	55.m03039	AN1520.1	AO070334000238	Nucleolar GTPase/ATPase p130	Y		0.123291	1	3	1	0	263	13	190			328	1
45	TTTCTTTTTCTTTTTTTT		up	up	71.m15917	AN2272.1	AO070295000048	Possible pfkB family carbohydrate kinase	G		1.06815	1	1	1	0	67	118	83	91	0
45	TTTCTTTTTCTTTTTTTT		up	up	71.m16112	AN2282.1	AO070295000059	Permease of the major facilitator superfamily	G		1.06815	1	2	1	0	61	441	247	No EST	No EST
45	TTTCTTTTTCTTTTTTTT		up	up	59.m08711	AN2867.1	AO070338000157	Phosphoglucomutase	G		1.06815	1	1	1	0	126	46	31	29	0
45	TTTCTTTTTCTTTTTTTT		up	up	59.m08724	AN2875.1	AO070338000136	Fructose 1,6-bisphosphate aldolase	G		1.06815	1	2	4	0	362	134	91	43	0
45	TTTCTTTTTCTTTTTTTT		up	up	59.m09058	AN2936.1	AO070337000172	Alpha-mannosidase	G		1.06815	1	1	1	0	122	264	289	No EST	No EST
45	TTTCTTTTTCTTTTTTTT		up	up	59.m08959	AN3059.1	AO070337000014	Phosphoglycerate mutase	G		1.06815	1	1	1	0	146	74	76	25	0
45	TTTCTTTTTCTTTTTTTT		up	up	52.m03703	AN3307.1	AO070330000183	Glycogen synthase	G		1.06815	4	2	2	0	121	142	28	No EST	No EST
45	TTTCTTTTTCTTTTTTTT		up	up	52.m03702	AN3308.1	AO070330000181	Alpha-amylase	G		1.06815	2	2	3	0	391	88	125	No EST	No EST
45	TTTCTTTTTCTTTTTTTT		up	down	58.m09022	AN1635.1	AO070299000058	mRNA processing protein	A		1.2493	1	1	1	0	93	122	181			No EST	No EST
45	TTTCTTTTTCTTTTTTTT		up	down	58.m07718	AN1639.1	AO070299000037	Thioredoxin-like protein	O		0.951548	1	2	1	1	359	248	348			No EST	No EST
45	TTTCTTTTTCTTTTTTTT		up	down	58.m07719	AN1652.1	AO070299000039	FOG: Zn-finger				2	3	3	0	352	175	369			No EST	No EST
45	TTTCTTTTTCTTTTTTTT		up	up	54.m06782	AN4234.1	AO070234000012	Phosphoglucomutase/phosphomannomutase	G		1.06815	1	2	1	0	90	135	128	77	0
45	TTTCTTTTTCTTTTTTTT		up	up	57.m05514	AN4591.1	AO070267000007	Phosphoglucomutase/phosphomannomutase	G		1.06815	1	1	1	0	10	25	45	No EST	No EST
45	TTTCTTTTTCTTTTTTTT		up	up	54.m06876	AN5144.1	AO070291000029	Fructose-6-phosphate 2-kinase/fructose-2,6-biphosphatase	G		1.06815	1	2	4	0	28	366	13	No EST	No EST
45	TTTCTTTTTCTTTTTTTT		up	down	69.m15037	AN1731.1	AO070324000062	Proline oxidase	E		0.255777	1	1	2	0	195	4	7			137	1
45	TTTCTTTTTCTTTTTTTT		up	up	69.m14907	AN5210.1	AO070337000270	Pyruvate kinase	G		1.06815	3	1	3	0	28	416	48	60	0
45	TTTCTTTTTCTTTTTTTT		up	up	69.m15435	AN5523.1	AO070341000366	Trehalose-6-phosphate synthase component TPS1 and related subunits	G		1.06815	1	1	3	0	320	163	136	201	1
45	TTTCTTTTTCTTTTTTTT		up	up	72.m19991	AN6286.1	AO070308000006	Glucosidase I	G		1.06815	1	1	4	0	67	266	293	No EST	No EST
45	TTTCTTTTTCTTTTTTTT		up	up	62.m03095	AN6508.1	AO070270000001	Glycogen synthase kinase-3	G		1.06815	1	3	3	0	411	36	69	36	0
45	TTTCTTTTTCTTTTTTTT		up	up	71.m15236	AN6900.1	AO070314000015	Triosephosphate isomerase	G		1.06815	2	1	2	0	82	221	126	No EST	No EST
45	TTTCTTTTTCTTTTTTTT		up	down	58.m07673	AN1828.1	AO070292000071	predicted protein [Neurospora crassa]				4	1	1	0	54	142	312			No EST	No EST
45	TTTCTTTTTCTTTTTTTT		up	up	57.m05882	AN7459.1	AO070287000066	Hexokinase	G		1.06815	3	1	1	0	61	23	0	No EST	No EST
45	TTTCTTTTTCTTTTTTTT		up	up	53.m03857	AN8010.1	AO070322000057	Glycogen synthase	G		1.06815	4	3	3	0	127	74	96	293	1
45	TTTCTTTTTCTTTTTTTT		up	up	53.m03905	AN8041.1	AO070330000005	Glyceraldehyde 3-phosphate dehydrogenase	G		1.06815	2	1	3	0	130	314	270	146	0
45	TTTCTTTTTCTTTTTTTT		up	up	62.m03393	AN8677.1	AO070315000097	Galactosyltransferases	G		1.06815	5	3	1	0	262	19	66	No EST	No EST
45	TTTCTTTTTCTTTTTTTT		up	down	57.m05716	AN1902.1	AO070341000151	Nucleolar GTPase/ATPase p130	Y		0.123291	1	2	3	0	33	24	62			505	1
45	TTTCTTTTTCTTTTTTTT		up	down	69.m14936	AN1918.1	AO070341000122	Phosphoenolpyruvate carboxykinase (ATP)	C		0.327087	3	1	4	0	14	19	10			195	1
45	TTTCTTTTTCTTTTTTTT		up	up	59.m09373	AN3113.1	AO070303000036	Glucose-6-phosphate/phosphate and phosphoenolpyruvate/phosphate antiporter	GE		1.06815025630857 0.255777139620395	4	2	6	0	109	243	73	No EST	No EST
45	TTTCTTTTTCTTTTTTTT		up	down	69.m14947	AN1931.1	AO070341000104	Predicted GTPase-activating protein	T		0.088765	1	1	2	0	86	94	108			No EST	No EST
45	TTTCTTTTTCTTTTTTTT		up	down	58.m07359	AN1940.1	AO070342000196	Nucleolar GTPase/ATPase p130	Y		0.123291	2	3	2	0	21	21	43			No EST	No EST
45	TTTCTTTTTCTTTTTTTT		up	up	70.m15335	AN0726.1	AO070343000481	beta-1,6-N-acetylglucosaminyltransferase, contains WSC domain	GO		1.06815025630857 0.951548363056541	1	2	3	0	205	163	38	170	1
45	TTTCTTTTTCTTTTTTTT		up	down	58.m07346	AN1950.1	AO070342000218	conserved hypothetical protein [Neurospora crassa]				3	3	3	0	103	17	110			496	1
45	TTTCTTTTTCTTTTTTTT		up	up	55.m03185	AN1602.1	AO070339000250	beta-1,6-N-acetylglucosaminyltransferase, contains WSC domain	GO		1.06815025630857 0.951548363056541	1	1	1	0	38	391	403	No EST	No EST
45	TTTCTTTTTCTTTTTTTT		up	up	70.m15003	AN1222.1	AO070331000222	S-adenosylmethionine synthetase	H		0.987082	4	3	3	0	22	163	133	193	1
45	TTTCTTTTTCTTTTTTTT		up	up	57.m05936	AN7660.1	AO070268000029	Bifunctional GTP cyclohydrolase II/3,4-dihydroxy-2butanone-4-phosphate synthase	H		0.987082	2	2	2	0	69	183	280	No EST	No EST
45	TTTCTTTTTCTTTTTTTT		up	down	58.m07570	AN1965.1	AO070301000046	Ribose-phosphate pyrophosphokinase	FE		2.25564684014177 0.255777139620395	3	3	1	0	105	3	326			133	1
45	TTTCTTTTTCTTTTTTTT		up	up	71.m15639	AN0243.1	AO070284000073	Phosphatidylinositol transfer protein SEC14 and related proteins	I		3.91278	1	1	1	0	42	181	273	No EST	No EST
45	TTTCTTTTTCTTTTTTTT		up	up	70.m15636	AN0640.1	AO070318000141	Sphingolipid hydroxylase	I		3.91278	1	1	2	0	395	101	206	No EST	No EST
45	TTTCTTTTTCTTTTTTTT		up	up	70.m15426	AN0824.1	AO070255000021	Short-chain acyl-CoA dehydrogenase	I		3.91278	2	2	1	0	75	87	106	25	0
45	TTTCTTTTTCTTTTTTTT		up	up	70.m14873	AN1357.1	AO070237000003	Phosphorylcholine transferase/cholinephosphate cytidylyltransferase	I		3.91278	3	1	3	0	124	182	137	No EST	No EST
45	TTTCTTTTTCTTTTTTTT		up	up	58.m07709	AN1614.1	AO070299000065	SAM-dependent methyltransferases	I		3.91278	2	1	2	0	187	241	309	No EST	No EST
45	TTTCTTTTTCTTTTTTTT		up	down	58.m07604	AN1995.1	AO070301000090	Spindle pole body protein	Z		5.80102	2	1	1	0	207	213	128			No EST	No EST
45	TTTCTTTTTCTTTTTTTT		up	down	58.m08943	AN2001.1	AO070301000099	predicted protein [Neurospora crassa]				1	1	1	0	218	156	186			No EST	No EST
45	TTTCTTTTTCTTTTTTTT		up	down	58.m07617	AN2008.1	AO070179000004	Predicted hydrolase (HAD superfamily)				3	3	2	1	63	141	177			No EST	No EST
45	TTTCTTTTTCTTTTTTTT		up	down	58.m07618	AN2009.1	AO070179000005	Transcription factor PRD and related proteins, contain PAX and HOX domains	K		4.15828	1	1	3	0	304	17	41			673	1
45	TTTCTTTTTCTTTTTTTT		up	up	58.m07772	AN1696.1	AO070305000020	Predicted acyltransferases	I		3.91278	2	1	2	0	382	165	49	No EST	No EST
45	TTTCTTTTTCTTTTTTTT		up	down	58.m08942	AN2011.1	AO070202000001	P-type ATPase				1	1	1	0	10	1	415			No EST	No EST
45	TTTCTTTTTCTTTTTTTT		up	up	57.m05768	AN2068.1	AO070341000217	Vigilin	I		3.91278	2	2	2	0	364	115	26	No EST	No EST
45	TTTCTTTTTCTTTTTTTT		up	up	66.m04646	AN3376.1	AO070281000020	Squalene synthetase	I		3.91278	6	3	4	0	12	38	71	298	1
45	TTTCTTTTTCTTTTTTTT		up	up	59.m09454	AN4997.1	AO070288000080	Phosphatidylinositol transfer protein SEC14 and related proteins	I		3.91278	1	1	4	0	29	131	142	No EST	No EST
45	TTTCTTTTTCTTTTTTTT		up	down	58.m07643	AN2055.1	AO070292000025	hypothetical protein [Neurospora crassa]				2	2	2	0	27	42	138			447	1
45	TTTCTTTTTCTTTTTTTT		up	up	58.m07549	AN5626.1	AO070301000025	Acyl-CoA synthetase	I		3.91278	1	1	3	0	407	175	142	66	0
45	TTTCTTTTTCTTTTTTTT		up	up	65.m07239	AN6731.1	AO070339000175	Fatty acid desaturase	I		3.91278	3	1	3	0	107	331	326	7	0
45	TTTCTTTTTCTTTTTTTT		up	up	62.m03303	AN7204.1	AO070293000065	Fatty acid desaturase	I		3.91278	2	2	2	0	25	188	195	No EST	No EST
45	TTTCTTTTTCTTTTTTTT		up	up	53.m03827	AN8117.1	AO070322000025	Fatty acyl-CoA elongase/Polyunsaturated fatty acid specific elongation enzyme	I		3.91278	3	2	5	0	183	218	231	No EST	No EST
45	TTTCTTTTTCTTTTTTTT		up	up	53.m03736	AN8233.1	AO070310000075	Phosphatidylinositol transfer protein SEC14 and related proteins	I		3.91278	1	1	3	0	85	251	169	117	0
45	TTTCTTTTTCTTTTTTTT		up	down	57.m05770	AN2072.1	AO070341000219	Ubiquitin C-terminal hydrolase	O		0.951548	2	1	1	0	160	325	12			No EST	No EST
45	TTTCTTTTTCTTTTTTTT		up	down	57.m05806	AN2105.1	AO070341000263	Small nuclear ribonucleoprotein SMD1 and related snRNPs	A		1.2493	1	1	3	0	48	83	27			57	0
45	TTTCTTTTTCTTTTTTTT		up	up	53.m03681	AN8280.1	AO070310000020	Long-chain acyl-CoA synthetases (AMP-forming)	I		3.91278	3	3	1	0	80	43	137	No EST	No EST
45	TTTCTTTTTCTTTTTTTT		up	down	72.m19711	AN2130.1	AO070278000033	Ras1 guanine nucleotide exchange factor	T		0.088765	3	2	1	0	31	40	3			No EST	No EST
45	TTTCTTTTTCTTTTTTTT		up	up	52.m04034	AN9407.1	AO070274000010	3-oxoacyl-[acyl-carrier protein] reductase	I		3.91278	1	2	4	0	217	3	23	No EST	No EST
45	TTTCTTTTTCTTTTTTTT		up	up	52.m04035	AN9408.1	AO070274000009	Enoyl reductase domain of yeast-type FAS1	I		3.91278	2	2	4	0	359	17	20	No EST	No EST
45	TTTCTTTTTCTTTTTTTT		up	down	72.m19699	AN2142.1	AO070343000188	Karyopherin (importin) alpha	U		3.41752	2	1	2	0	39	456	226			144	0
45	TTTCTTTTTCTTTTTTTT		up	up	54.m06529	AN0254.1	AO070334000106	C-3 sterol dehydrogenase/3-beta-hydroxysteroid dehydrogenase and related dehydrogenases	IE		3.91278222556957 0.255777139620395	2	1	5	0	42	147	126	No EST	No EST
45	TTTCTTTTTCTTTTTTTT		up	up	54.m06444	AN0314.1	AO070334000018	Aspartyl-tRNA synthetase	J		0.203093	2	1	2	0	137	205	121	69	0
45	TTTCTTTTTCTTTTTTTT		up	up	54.m06616	AN0455.1	AO070328000183	Acetyltransferases, including N-acetylases of ribosomal proteins	J		0.203093	1	1	1	0	29	113	70	No EST	No EST
45	TTTCTTTTTCTTTTTTTT		up	up	72.m19688	AN2153.1	AO070343000202	Exosomal 3'-5' exoribonuclease complex, subunit Rrp41 and related exoribonucleases	J		0.203093	1	2	2	0	225	142	282	No EST	No EST
45	TTTCTTTTTCTTTTTTTT		up	down	72.m19677	AN2163.1	AO070343000222	Mitotic spindle checkpoint protein	D		0.939028	3	1	7	0	100	295	57			274	0
45	TTTCTTTTTCTTTTTTTT		up	up	59.m09062	AN2932.1	AO070337000175	Translation initiation factor 4F, helicase subunit (eIF-4A) and related helicases	J		0.203093	1	1	3	0	283	86	6	275	1
45	TTTCTTTTTCTTTTTTTT		up	down	71.m15855	AN2210.1	AO070294000012	Predicted transporter (ABC superfamily)				2	3	1	0	81	9	11			344	1
45	TTTCTTTTTCTTTTTTTT		up	up	54.m06579	AN4015.1	AO070328000151	Translation initiation factor 5A (eIF-5A)	J		0.203093	2	3	2	0	86	113	157	70	0
45	TTTCTTTTTCTTTTTTTT		up	up	54.m06800	AN4218.1	AO070315000081	Translation elongation factor EF-1 alpha/Tu	J		0.203093	3	3	2	1	126	283	77	96	0
45	TTTCTTTTTCTTTTTTTT		up	up	59.m08665	AN5014.1	AO070334000120	60S ribosomal protein L22	J		0.203093	1	1	1	0	327	81	82	70	0
45	TTTCTTTTTCTTTTTTTT		up	down	71.m15881	AN2247.1	AO070326000126	Myosin class II heavy chain	Z		5.80102	2	1	2	0	21	2	8			No EST	No EST
45	TTTCTTTTTCTTTTTTTT		up	up	54.m06840	AN5719.1	AO070324000131	60s acidic ribosomal protein P1	J		0.203093	1	1	1	0	50	187	131	101	0
45	TTTCTTTTTCTTTTTTTT		up	down	71.m15895	AN2255.1	AO070326000108	Transcription regulator XNP/ATRX, DEAD-box superfamily	K		4.15828	3	1	1	0	34	135	178			No EST	No EST
45	TTTCTTTTTCTTTTTTTT		up	down	71.m15896	AN2256.1	AO070326000107	Helicase-like transcription factor HLTF/DNA helicase RAD5, DEAD-box superfamily	KL		4.15828392190872 0.6349440929397	2	1	1	0	9	24	191			No EST	No EST
45	TTTCTTTTTCTTTTTTTT		up	up	71.m15450	AN0176.1	AO070321000065	GATA-4/5/6 transcription factors	K		4.15828	1	2	2	0	208	218	79	No EST	No EST
45	TTTCTTTTTCTTTTTTTT		up	up	54.m06667	AN0407.1	AO070338000247	RNA polymerase III transcription factor TFIIIC	K		4.15828	1	2	2	0	315	176	299	No EST	No EST
45	TTTCTTTTTCTTTTTTTT		up	up	70.m15524	AN0917.1	AO070320000097	Transcriptional coactivator CAPER (RRM superfamily)	K		4.15828	1	1	1	0	46	227	354	168	0
45	TTTCTTTTTCTTTTTTTT		up	up	70.m15059	AN1162.1	AO070331000152	Elongation factor 1 beta/delta chain	K		4.15828	1	1	1	0	41	117	113	17	0
45	TTTCTTTTTCTTTTTTTT		up	up	58.m07590	AN1984.1	AO070301000069	Transcription initiation factor TFIID, subunit BDF1 and related bromodomain proteins	K		4.15828	1	1	1	0	261	258	114	No EST	No EST
45	TTTCTTTTTCTTTTTTTT		up	down	71.m15519	AN2315.1	AO070323000037	F0F1-type ATP synthase, beta subunit	C		0.327087	2	1	4	1	111	306	21			307	1
45	TTTCTTTTTCTTTTTTTT		up	up	59.m08698	AN2854.1	AO070338000167	Transcription factor of the Forkhead/HNF3 family	K		4.15828	1	1	1	0	185	76	245	No EST	No EST
45	TTTCTTTTTCTTTTTTTT		up	down	72.m19478	AN2425.1	AO070241000006	Protein phosphatase, regulatory subunit PPP1R3C/D	OT		0.951548363056541 0.0887649648758591	1	2	2	0	257	232	219			489	1
45	TTTCTTTTTCTTTTTTTT		up	up	59.m09396	AN2911.1	AO070338000094	Transcriptional activator FOSB/c-Fos and related bZIP transcription factors	K		4.15828	4	4	2	0	88	112	48	No EST	No EST
45	TTTCTTTTTCTTTTTTTT		up	up	54.m06748	AN4187.1	AO070342000108	SNF2 family DNA-dependent ATPase domain-containing protein	K		4.15828	3	2	4	0	105	440	201	No EST	No EST
45	TTTCTTTTTCTTTTTTTT		up	down	69.m15223	AN2435.1	AO070264000043	ATP-citrate lyase	C		0.327087	1	1	3	0	54	88	7			207	1
45	TTTCTTTTTCTTTTTTTT		up	down	69.m15197	AN2459.1	AO070264000014	Protein phosphatase 1, regulatory subunit, and related proteins	T		0.088765	1	1	5	0	1	106	2			No EST	No EST
45	TTTCTTTTTCTTTTTTTT		up	down	69.m15203	AN2464.1	AO070264000006	Protein transporter of the TRAM (translocating chain-associating membrane) superfamily	U		3.41752	1	1	1	0	88	147	234			341	1
45	TTTCTTTTTCTTTTTTTT		up	up	58.m07962	AN4361.1	AO070261000004	Transcriptional activator FOSB/c-Fos and related bZIP transcription factors	K		4.15828	1	1	3	0	242	199	270	263	1
45	TTTCTTTTTCTTTTTTTT		up	down	59.m08494	AN2496.1	AO070312000124	Putative transmembrane protein cmp44E				1	2	2	0	48	9	146			No EST	No EST
45	TTTCTTTTTCTTTTTTTT		up	down	59.m09383	AN2499.1	AO070312000049	RNA polymerase II elongator associated protein				1	1	2	0	184	147	59			675	1
45	TTTCTTTTTCTTTTTTTT		up	down	54.m06688	AN2743.1	AO070338000228	Translation initiation factor 3, subunit a (eIF-3a)	J		0.203093	3	3	2	0	75	44	63			No EST	No EST
45	TTTCTTTTTCTTTTTTTT		up	down	54.m06687	AN2744.1	AO070338000227	predicted protein [Neurospora crassa]				1	8	1	0	105	7	23			No EST	No EST
45	TTTCTTTTTCTTTTTTTT		up	down	54.m06683	AN2748.1	AO070338000223	FOG: Zn-finger				1	1	3	0	515	380	55			No EST	No EST
45	TTTCTTTTTCTTTTTTTT		up	down	54.m06680	AN2749.1	AO070338000221	WASP-interacting protein VRP1/WIP, contains WH2 domain	Z		5.80102	2	2	2	0	48	122	131			No EST	No EST
45	TTTCTTTTTCTTTTTTTT		up	down	54.m06682	AN2750.1	AO070338000222					3	1	1	0	105	139	448			No EST	No EST
45	TTTCTTTTTCTTTTTTTT		up	down	59.m09500	AN2756.1	AO070327000037	Actin-binding protein SLA2/Huntingtin-interacting protein Hip1	Z		5.80102	2	1	3	0	202	99	162			207	1
45	TTTCTTTTTCTTTTTTTT		up	down	59.m09254	AN2757.1	AO070327000036	Uncharacterized conserved protein TEX2, contains PH domain				1	1	1	0	158	174	128			No EST	No EST
45	TTTCTTTTTCTTTTTTTT		up	down	59.m09264	AN2760.1	AO070327000022	Lactoylglutathione lyase and related lyases	E		0.255777	2	1	1	0	281	39	6			295	1
45	TTTCTTTTTCTTTTTTTT		up	up	59.m08799	AN4900.1	AO070338000044	RNA polymerase II, large subunit	K		4.15828	2	2	2	0	18	162	185	662	1
45	TTTCTTTTTCTTTTTTTT		up	down	59.m09488	AN2766.1	AO070327000031	Phosphatidylinositol-4-phosphate 5-kinase	T		0.088765	1	1	1	0	381	400	360			No EST	No EST
45	TTTCTTTTTCTTTTTTTT		up	up	72.m19202	AN5929.1	AO070340000354	Calcium-responsive transcription coactivator	K		4.15828	2	2	3	0	200	163	69	No EST	No EST
45	TTTCTTTTTCTTTTTTTT		up	up	72.m19132	AN6012.1	AO070340000266	Transcription initiation factor TFIID, subunit BDF1 and related bromodomain proteins	K		4.15828	2	3	3	0	278	73	20	No EST	No EST
45	TTTCTTTTTCTTTTTTTT		up	up	72.m19649	AN7608.1	AO070343000269	RNA Polymerase C (III) 37 kDa subunit	K		4.15828	1	1	1	0	261	235	167	No EST	No EST
45	TTTCTTTTTCTTTTTTTT		up	up	53.m04172	AN8272.1	AO070310000029	RNA polymerase III (C) subunit	K		4.15828	1	1	1	0	169	43	55	No EST	No EST
45	TTTCTTTTTCTTTTTTTT		up	up	62.m03394	AN8676.1	AO070315000096	Regulator of arginine metabolism and related MADS box-containing transcription factors	K		4.15828	1	3	2	0	187	299	357	157	0
45	TTTCTTTTTCTTTTTTTT		up	up	70.m15474	AN0872.1	AO070320000030	CDC45 (cell division cycle 45)-like protein	L		0.634944	2	1	1	0	35	236	66	No EST	No EST
45	TTTCTTTTTCTTTTTTTT		up	down	59.m08719	AN2871.1	AO070338000143	SWI-SNF chromatin-remodeling complex protein	B		6.72132	4	2	3	0	94	106	155			No EST	No EST
45	TTTCTTTTTCTTTTTTTT		up	up	70.m15174	AN1060.1	AO070218000003	DNA damage-responsive repressor GIS1/RPH1, jumonji superfamily	L		0.634944	1	3	1	0	198	170	488	No EST	No EST
45	TTTCTTTTTCTTTTTTTT		up	down	59.m08744	AN2895.1	AO070338000115	Uncharacterized conserved protein				1	1	1	0	14	28	59			No EST	No EST
45	TTTCTTTTTCTTTTTTTT		up	down	59.m08751	AN2901.1	AO070338000106	Arginase	E		0.255777	2	1	1	0	5	156	63			67	0
45	TTTCTTTTTCTTTTTTTT		up	up	69.m15021	AN3909.1	AO070324000094	Translesion DNA polymerase - REV1 deoxycytidyl transferase	L		0.634944	1	1	1	0	230	12	3	No EST	No EST
45	TTTCTTTTTCTTTTTTTT		up	up	72.m19611	AN7589.1	AO070343000303	Predicted hydrolase involved in interstrand cross-link repair	L		0.634944	1	1	3	0	180	179	73	No EST	No EST
45	TTTCTTTTTCTTTTTTTT		up	up	53.m03793	AN8185.1	AO070310000139	5'-3' exonuclease XRN1/KEM1/SEP1 involved in DNA strand exchange and mRNA turnover	LD		0.6349440929397 0.939027978679397	1	1	1	0	216	46	46	No EST	No EST
45	TTTCTTTTTCTTTTTTTT		up	down	59.m09062	AN2932.1	AO070337000175	Translation initiation factor 4F, helicase subunit (eIF-4A) and related helicases	J		0.203093	1	1	2	0	249	302	277			624	1
45	TTTCTTTTTCTTTTTTTT		up	up	69.m15386	AN3729.1	AO070342000283	1,3-beta-glucan synthase/callose synthase catalytic subunit	M		6.64288	2	2	1	1	371	95	23	No EST	No EST
45	TTTCTTTTTCTTTTTTTT		up	up	56.m03102	AN4372.1	AO070275000045	Endopolygalacturonase	M		6.64288	2	1	2	0	95	464	358	No EST	No EST
45	TTTCTTTTTCTTTTTTTT		up	down	59.m09028	AN2985.1	AO070337000137	Predicted transporter (major facilitator superfamily)				1	1	2	0	13	307	3			130	0
45	TTTCTTTTTCTTTTTTTT		up	down	59.m09022	AN2992.1	AO070337000126	Translation initiation factor 2, beta subunit (eIF-2beta)	J		0.203093	1	3	1	0	43	79	104			355	1
45	TTTCTTTTTCTTTTTTTT		up	down	59.m09013	AN3001.1	AO070337000111	Mitogen-activated protein kinase kinase (MAP2K)	T		0.088765	3	2	2	0	43	144	107			320	1
45	TTTCTTTTTCTTTTTTTT		up	down	59.m08981	AN3036.1	AO070337000078	predicted protein [Neurospora crassa]				1	1	2	0	238	24	15			No EST	No EST
45	TTTCTTTTTCTTTTTTTT		up	up	72.m19590	AN7571.1	AO070343000417	Predicted mechanosensitive ion channel	M		6.64288	3	1	1	0	134	238	63	No EST	No EST
45	TTTCTTTTTCTTTTTTTT		up	up	59.m09479	AN3445.1	AO070265000021	Extracellular protein SEL-1 and related proteins	MOT		6.642878635625 0.951548363056541 0.0887649648758591	1	1	4	0	20	446	262	No EST	No EST
45	TTTCTTTTTCTTTTTTTT		up	down	59.m08932	AN3067.1	AO070337000006	DNA polymerase epsilon, catalytic subunit A	L		0.634944	1	1	2	0	14	32	15			No EST	No EST
45	TTTCTTTTTCTTTTTTTT		up	up	70.m15462	AN0866.1	AO070320000017	Molecular chaperones HSP70/HSC70, HSP70 superfamily	O		0.951548	3	3	3	0	50	172	148	No EST	No EST
45	TTTCTTTTTCTTTTTTTT		up	down	59.m08919	AN3079.1	AO070224000007					1	1	3	0	97	32	30			No EST	No EST
45	TTTCTTTTTCTTTTTTTT		up	up	70.m15455	AN0871.1	AO070320000029	Gpi-anchor transamidase	O		0.951548	1	1	1	0	54	256	64	No EST	No EST
45	TTTCTTTTTCTTTTTTTT		up	down	59.m08918	AN3080.1	AO070224000006	Vesicle coat complex COPII, subunit SFB3	U		3.41752	1	1	1	0	122	36	439			No EST	No EST
45	TTTCTTTTTCTTTTTTTT		up	up	70.m15203	AN1047.1	AO070313000109	Molecular chaperones HSP105/HSP110/SSE1, HSP70 superfamily	O		0.951548	2	2	4	0	127	366	195	No EST	No EST
45	TTTCTTTTTCTTTTTTTT		up	up	70.m15130	AN1102.1	AO070285000036	Serine palmitoyltransferase	O		0.951548	1	1	4	0	58	245	27	150	0
45	TTTCTTTTTCTTTTTTTT		up	up	55.m02957	AN1455.1	AO070302000021	Oligosaccharyltransferase, STT3 subunit	O		0.951548	2	1	2	0	7	160	132	No EST	No EST
45	TTTCTTTTTCTTTTTTTT		up	up	58.m07660	AN1851.1	AO070292000043	Chaperonin complex component, TCP-1 theta subunit (CCT8)	O		0.951548	1	1	1	0	39	109	115	No EST	No EST
45	TTTCTTTTTCTTTTTTTT		up	down	59.m09373	AN3113.1	AO070303000036	Glucose-6-phosphate/phosphate and phosphoenolpyruvate/phosphate antiporter	GE		1.06815025630857 0.255777139620395	1	1	1	0	387	367	116			No EST	No EST
45	TTTCTTTTTCTTTTTTTT		up	up	57.m05760	AN2062.1	AO070341000205	Molecular chaperones GRP78/BiP/KAR2, HSP70 superfamily	O		0.951548	2	4	1	0	188	105	179	173	1
45	TTTCTTTTTCTTTTTTTT		up	down	59.m08623	AN3114.1	AO070303000035	predicted protein [Neurospora crassa]				3	3	3	0	219	179	248			No EST	No EST
45	TTTCTTTTTCTTTTTTTT		up	up	72.m19685	AN2157.1	AO070343000208	Aspartyl protease	O		0.951548	2	1	1	0	196	401	216	278	0
45	TTTCTTTTTCTTTTTTTT		up	down	59.m08584	AN3142.1	AO070303000002	Nucleolar GTPase/ATPase p130	Y		0.123291	1	2	5	0	387	157	119			297	1
45	TTTCTTTTTCTTTTTTTT		up	down	59.m08506	AN3145.1	AO070312000163	Splicing coactivator SRm160/300, subunit SRm300	A		1.2493	2	2	2	0	58	66	70			386	1
45	TTTCTTTTTCTTTTTTTT		up	down	59.m08562	AN3172.1	AO070256000018	40S ribosomal protein SA (P40)/Laminin receptor 1	J		0.203093	1	1	1	0	216	116	200			399	1
45	TTTCTTTTTCTTTTTTTT		up	down	59.m08573	AN3181.1	AO070256000007	Tyrosine kinase specific for activated (GTP-bound) p21cdc42Hs	T		0.088765	1	1	1	0	175	37	66			No EST	No EST
45	TTTCTTTTTCTTTTTTTT		up	down	59.m08571	AN3183.1	AO070256000009	Heterochromatin-associated protein HP1 and related CHROMO domain proteins	B		6.72132	2	1	1	0	114	301	357			No EST	No EST
45	TTTCTTTTTCTTTTTTTT		up	up	59.m09263	AN2761.1	AO070327000023	Ubiquitin-protein ligase	O		0.951548	4	4	5	0	159	271	140	144	0
45	TTTCTTTTTCTTTTTTTT		up	up	59.m08754	AN2903.1	AO070338000102	Aspartyl protease	O		0.951548	1	1	1	0	90	384	448	70	0
45	TTTCTTTTTCTTTTTTTT		up	up	58.m07379	AN3581.1	AO070342000168	Thioredoxin reductase	O		0.951548	3	2	2	0	132	39	72	163	1
45	TTTCTTTTTCTTTTTTTT		up	up	58.m07392	AN3592.1	AO070342000144	Calnexin	O		0.951548	1	3	3	0	188	295	34	126	0
45	TTTCTTTTTCTTTTTTTT		up	up	54.m06754	AN4192.1	AO070342000112	Molecular chaperone (DnaJ superfamily)	O		0.951548	2	1	2	0	2	415	89	No EST	No EST
45	TTTCTTTTTCTTTTTTTT		up	up	71.m15667	AN4683.1	AO070284000018	Oligosaccharyltransferase, beta subunit	O		0.951548	1	1	1	0	62	146	132	No EST	No EST
45	TTTCTTTTTCTTTTTTTT		up	down	59.m09275	AN3422.1	AO070327000010	Mitogen-activated protein kinase kinase (MAP2K)	T		0.088765	1	1	2	0	146	175	37			376	1
45	TTTCTTTTTCTTTTTTTT		up	down	59.m09280	AN3426.1	AO070327000005	Exosomal 3'-5' exoribonuclease complex, subunit Rrp4	A		1.2493	2	1	1	0	322	231	28			No EST	No EST
45	TTTCTTTTTCTTTTTTTT		up	up	59.m09222	AN4761.1	AO070327000055	Dolichyl-phosphate-mannose:protein O-mannosyl transferase	O		0.951548	1	1	1	0	231	183	344	No EST	No EST
45	TTTCTTTTTCTTTTTTTT		up	up	54.m06917	AN5105.1	AO070291000074	Dolichyl-phosphate-mannose:protein O-mannosyl transferase	O		0.951548	2	2	3	1	259	312	175	No EST	No EST
45	TTTCTTTTTCTTTTTTTT		up	up	69.m15458	AN5495.1	AO070341000391	Ubiquitin-protein ligase	O		0.951548	1	1	3	0	49	140	48	No EST	No EST
45	TTTCTTTTTCTTTTTTTT		up	up	72.m19133	AN6010.1	AO070340000269	Molecular chaperones mortalin/PBP74/GRP75, HSP70 superfamily	O		0.951548	2	3	3	0	96	320	331	149	0
45	TTTCTTTTTCTTTTTTTT		up	up	72.m19080	AN6089.1	AO070340000143	Mitochondrial chaperonin, Cpn60/Hsp60p	O		0.951548	2	2	2	0	22	182	177	140	0
45	TTTCTTTTTCTTTTTTTT		up	down	58.m07441	AN3659.1	AO070342000029	Adaptor protein Enigma and related PDZ-LIM proteins	TZ		0.0887649648758591 5.80101679073153	1	1	1	0	151	45	52			No EST	No EST
45	TTTCTTTTTCTTTTTTTT		up	up	72.m19291	AN6193.1	AO070308000106	Mitochondrial ATP-dependent protease PIM1/LON	O		0.951548	1	1	1	0	77	155	80	128	0
45	TTTCTTTTTCTTTTTTTT		up	down	58.m07430	AN3669.1	AO070342000010	Protein involved in cell differentiation/sexual development				4	2	5	0	134	145	135			No EST	No EST
45	TTTCTTTTTCTTTTTTTT		up	down	69.m15403	AN3696.1	AO070341000317	Equilibrative nucleoside transporter protein	F		2.25565	2	1	1	0	79	102	117			326	1
45	TTTCTTTTTCTTTTTTTT		up	up	62.m03116	AN6528.1	AO070270000028	Prenyl protein protease	O		0.951548	1	1	1	0	252	380	266	58	0
45	TTTCTTTTTCTTTTTTTT		up	down	69.m15380	AN3735.1	AO070342000272	GTPase-activating protein				1	2	1	0	349	291	284			No EST	No EST
45	TTTCTTTTTCTTTTTTTT		up	up	72.m19795	AN7254.1	AO070297000010	AAA+-type ATPase	O		0.951548	1	1	2	0	4	261	235	106	0
45	TTTCTTTTTCTTTTTTTT		up	down	65.m07351	AN3765.1	AO070309000034					1	1	1	0	281	167	295			No EST	No EST
45	TTTCTTTTTCTTTTTTTT		up	down	65.m07196	AN3781.1	AO070289000057	Na+/Pi symporter	P		1.35807	1	1	1	0	13	15	11			No EST	No EST
45	TTTCTTTTTCTTTTTTTT		up	up	72.m19566	AN7549.1	AO070277000046	AAA+-type ATPase	O		0.951548	1	1	1	0	36	189	176	No EST	No EST
45	TTTCTTTTTCTTTTTTTT		up	down	57.m05667	AN3815.1	AO070311000013	Dystonin, GAS (Growth-arrest-specific protein), and related proteins	Z		5.80102	3	3	5	0	61	46	63			No EST	No EST
45	TTTCTTTTTCTTTTTTTT		up	down	58.m07830	AN3853.1	AO070305000093	Metalloendoprotease HMP1 (insulinase superfamily)	O		0.951548	1	1	1	0	187	135	141			No EST	No EST
45	TTTCTTTTTCTTTTTTTT		up	down	58.m07841	AN3869.1	AO070305000105	Mevalonate kinase MVK/ERG12	I		3.91278	2	1	1	0	27	172	84			No EST	No EST
45	TTTCTTTTTCTTTTTTTT		up	up	72.m19586	AN7567.1	AO070343000413	Glutaredoxin-related protein	O		0.951548	1	3	2	0	161	140	76	No EST	No EST
45	TTTCTTTTTCTTTTTTTT		up	up	72.m19597	AN7579.1	AO070343000426	26S proteasome regulatory complex, subunit RPN10/PSMD4	O		0.951548	1	1	1	0	98	114	141	No EST	No EST
45	TTTCTTTTTCTTTTTTTT		up	down	69.m14999	AN3929.1	AO070341000037	Permease of the major facilitator superfamily	G		1.06815	1	1	1	0	495	136	234			No EST	No EST
45	TTTCTTTTTCTTTTTTTT		up	down	69.m14975	AN3946.1	AO070341000066	Mitotic checkpoint serine/threonine protein kinase	D		0.939028	1	3	1	0	91	49	319			No EST	No EST
45	TTTCTTTTTCTTTTTTTT		up	up	53.m03928	AN8075.1	AO070330000033	Deoxyhypusine synthase	O		0.951548	2	1	1	0	66	5	483	35	1
45	TTTCTTTTTCTTTTTTTT		up	down	54.m06592	AN3999.1	AO070328000163	E3 ubiquitin protein ligase	O		0.951548	1	2	3	0	417	185	317			No EST	No EST
45	TTTCTTTTTCTTTTTTTT		up	up	59.m09455	AN8605.1	AO070314000022	Cyclophilin type peptidyl-prolyl cis-trans isomerase	O		0.951548	1	1	1	0	55	464	129	32	0
45	TTTCTTTTTCTTTTTTTT		up	up	62.m03392	AN8679.1	AO070315000099	RAB proteins geranylgeranyltransferase component A (RAB escort protein)	O		0.951548	1	2	1	0	176	214	399	No EST	No EST
45	TTTCTTTTTCTTTTTTTT		up	up	72.m19478	AN2425.1	AO070241000006	Protein phosphatase, regulatory subunit PPP1R3C/D	OT		0.951548363056541 0.0887649648758591	2	2	2	0	238	154	273	No EST	No EST
45	TTTCTTTTTCTTTTTTTT		up	down	54.m06562	AN4034.1	AO070328000126	CCAAT-binding factor, subunit A (HAP3)	K		4.15828	1	2	2	0	335	328	276			2	0
45	TTTCTTTTTCTTTTTTTT		up	down	54.m06733	AN4088.1	AO070342000091	predicted protein [Neurospora crassa]				2	3	2	0	309	272	296			No EST	No EST
45	TTTCTTTTTCTTTTTTTT		up	up	71.m15641	AN0241.1	AO070284000071	Cu2+/Zn2+ superoxide dismutase SOD1	P		1.35807	1	1	4	0	243	243	13	123	0
45	TTTCTTTTTCTTTTTTTT		up	up	70.m15760	AN1181.1	AO070331000179	Ammonia permease	P		1.35807	1	2	1	0	209	302	290	No EST	No EST
45	TTTCTTTTTCTTTTTTTT		up	up	55.m02974	AN1472.1	AO070306000093	Tellurite resistance protein and related permeases	P		1.35807	1	1	4	0	283	431	322	No EST	No EST
45	TTTCTTTTTCTTTTTTTT		up	up	58.m07716	AN1630.1	AO070299000035	Catalase (peroxidase I)	P		1.35807	1	2	2	0	149	370	311	69	0
45	TTTCTTTTTCTTTTTTTT		up	up	72.m19547	AN1795.1	AO070309000136	Zn2+ transporter ZNT1 and related Cd2+/Zn2+ transporters (cation diffusion facilitator superfamily)	P		1.35807	2	1	2	0	220	303	284	137	0
45	TTTCTTTTTCTTTTTTTT		up	up	57.m05611	AN4517.1	AO070321000123	Heavy metal exporter HMT1, ABC superfamily	P		1.35807	3	2	3	0	101	0	45	556	1
45	TTTCTTTTTCTTTTTTTT		up	up	59.m09466	AN4859.1	AO070329000143	Plasma membrane H+-transporting ATPase	P		1.35807	5	3	2	1	96	133	185	103	0
45	TTTCTTTTTCTTTTTTTT		up	up	69.m15495	AN5440.1	AO070333000102	Catalase (peroxidase I)	P		1.35807	1	1	1	0	133	126	65	No EST	No EST
45	TTTCTTTTTCTTTTTTTT		up	down	54.m06765	AN4206.1	AO070231000018	Splicing coactivator SRm160/300, subunit SRm300	A		1.2493	2	1	1	0	237	271	73			456	1
45	TTTCTTTTTCTTTTTTTT		up	down	54.m06959	AN4214.1	AO070231000010	Alternative splicing factor SRp55/B52/SRp75 (RRM superfamily)	A		1.2493	2	1	2	0	57	47	402			No EST	No EST
45	TTTCTTTTTCTTTTTTTT		up	up	69.m15483	AN5449.1	AO070239000028	Arylsulfatase A and related enzymes	P		1.35807	5	3	2	0	124	203	131	No EST	No EST
45	TTTCTTTTTCTTTTTTTT		up	up	69.m14939	AN5549.1	AO070341000115	Inorganic phosphate transporter	P		1.35807	1	2	1	0	182	438	175	308	0
45	TTTCTTTTTCTTTTTTTT		up	down	54.m06778	AN4237.1	AO070234000004	predicted protein [Neurospora crassa]				2	1	1	0	77	222	185			No EST	No EST
45	TTTCTTTTTCTTTTTTTT		up	down	54.m07034	AN4238.1	AO070234000002	Ribosomal protein S6 kinase and related proteins	T		0.088765	3	2	3	0	34	141	87			151	1
45	TTTCTTTTTCTTTTTTTT		up	up	72.m18948	AN5821.1	AO070260000024	Ca2+/H+ antiporter VCX1 and related proteins	P		1.35807	1	1	4	0	162	262	54	No EST	No EST
45	TTTCTTTTTCTTTTTTTT		up	down	58.m08010	AN4314.1	AO070230000002	predicted protein [Neurospora crassa]				4	1	3	0	43	141	166			No EST	No EST
45	TTTCTTTTTCTTTTTTTT		up	down	58.m08007	AN4317.1	AO070230000006	Vesicle coat complex COPII, subunit SEC13	U		3.41752	1	1	2	0	14	31	13			118	1
45	TTTCTTTTTCTTTTTTTT		up	up	72.m19051	AN6107.1	AO070340000100	Cl- channel CLC-3 and related proteins (CLC superfamily)	P		1.35807	2	1	2	0	94	311	46	No EST	No EST
45	TTTCTTTTTCTTTTTTTT		up	up	53.m03875	AN8029.1	AO070322000075	Na+/K+ transporter	P		1.35807	1	1	1	0	437	90	74	No EST	No EST
45	TTTCTTTTTCTTTTTTTT		up	up	59.m08810	AN4906.1	AO070338000039	Ferric reductase, NADH/NADPH oxidase and related proteins	PQ		1.35806928644389 0.66935342495277	1	1	1	0	36	115	501	No EST	No EST
45	TTTCTTTTTCTTTTTTTT		up	up	70.m15198	AN1041.1	AO070336000075	Ca2+-modulated nonselective cation channel polycystin	PT		1.35806928644389 0.0887649648758591	1	1	1	0	62	332	399	No EST	No EST
45	TTTCTTTTTCTTTTTTTT		up	down	58.m08982	AN4411.1	AO070273000031	hypothetical protein ( (AL513462) related to Sts1 protein [Neurospora crassa] )				3	1	4	0	357	243	206			No EST	No EST
45	TTTCTTTTTCTTTTTTTT		up	down	58.m07907	AN4418.1	AO070273000039	predicted protein [Neurospora crassa]				1	1	1	0	274	271	423			No EST	No EST
45	TTTCTTTTTCTTTTTTTT		up	up	70.m15374	AN0771.1	AO070316000073	Pleiotropic drug resistance proteins (PDR1-15), ABC superfamily	Q		0.669353	1	2	1	0	134	279	198	No EST	No EST
45	TTTCTTTTTCTTTTTTTT		up	up	70.m15122	AN1111.1	AO070285000025	Flavin-containing monooxygenase	Q		0.669353	2	2	1	0	69	415	253	No EST	No EST
45	TTTCTTTTTCTTTTTTTT		up	down	58.m07850	AN4465.1	AO070305000119	Putative growth response protein	T		0.088765	1	1	4	1	22	12	24			No EST	No EST
45	TTTCTTTTTCTTTTTTTT		up	down	58.m07862	AN4472.1	AO070305000131	Putative transcription factor HALR/MLL3, involved in embryonic development				1	1	1	0	35	86	181			No EST	No EST
45	TTTCTTTTTCTTTTTTTT		up	up	71.m15558	AN5318.1	AO070334000168	Non-ribosomal peptide synthetase/alpha-aminoadipate reductase and related enzymes	Q		0.669353	1	2	1	0	156	228	303	No EST	No EST
45	TTTCTTTTTCTTTTTTTT		up	down	57.m05654	AN4479.1	AO070311000025	FOG: HAMP domain	T		0.088765	2	1	2	0	19	277	25			No EST	No EST
45	TTTCTTTTTCTTTTTTTT		up	up	72.m18952	AN5823.1	AO070260000021	Lysine/ornithine N-monooxygenase	Q		0.669353	2	1	4	0	16	374	74	No EST	No EST
45	TTTCTTTTTCTTTTTTTT		up	up	53.m03878	AN8928.1	AO070281000035	Pleiotropic drug resistance proteins (PDR1-15), ABC superfamily	Q		0.669353	1	1	1	0	202	86	262	No EST	No EST
45	TTTCTTTTTCTTTTTTTT		up	up	71.m15438	AN0163.1	AO070321000084	Rho GDP-dissociation inhibitor	T		0.088765	1	2	1	0	164	300	367	No EST	No EST
45	TTTCTTTTTCTTTTTTTT		up	down	57.m05641	AN4490.1	AO070311000042	TFIIF-interacting CTD phosphatase, including NLI-interacting factor (involved in RNA polymerase II regulation)	K		4.15828	1	3	1	0	44	33	103			279	1
45	TTTCTTTTTCTTTTTTTT		up	down	57.m05629	AN4501.1	AO070311000054	Multifunctional chaperone (14-3-3 family)	O		0.951548	1	1	2	0	12	186	86			508	1
45	TTTCTTTTTCTTTTTTTT		up	down	57.m05616	AN4513.1	AO070311000069	Kinesin-like protein	Z		5.80102	1	1	1	0	93	14	228			No EST	No EST
45	TTTCTTTTTCTTTTTTTT		up	up	69.m15270	AN0575.1	AO070272000054	Calmodulin-binding protein CRAG, contains DENN domain	T		0.088765	4	2	2	0	187	147	73	117	0
45	TTTCTTTTTCTTTTTTTT		up	down	57.m05597	AN4529.1	AO070321000139					2	2	2	0	12	52	24			No EST	No EST
45	TTTCTTTTTCTTTTTTTT		up	down	57.m05584	AN4537.1	AO070321000154	Ypt/Rab-specific GTPase-activating protein GYP6	U		3.41752	1	1	1	0	14	98	235			No EST	No EST
45	TTTCTTTTTCTTTTTTTT		up	up	70.m15539	AN0931.1	AO070320000122	Mitogen-activated protein kinase kinase (MAP2K)	T		0.088765	1	1	4	0	383	84	26	No EST	No EST
45	TTTCTTTTTCTTTTTTTT		up	down	57.m05579	AN4546.1	AO070321000159	PolyC-binding proteins alphaCP-1 and related KH domain proteins	A		1.2493	1	3	1	0	353	104	136			No EST	No EST
45	TTTCTTTTTCTTTTTTTT		up	down	57.m05557	AN4547.1	AO070321000185	Vesicle coat complex COPI, gamma subunit	U		3.41752	1	3	2	0	88	83	87			148	1
45	TTTCTTTTTCTTTTTTTT		up	up	70.m15629	AN0988.1	AO070318000150	LAMMER dual specificity kinases	T		0.088765	1	2	3	0	44	64	49	No EST	No EST
45	TTTCTTTTTCTTTTTTTT		up	down	57.m05501	AN4579.1	AO070316000166	predicted protein [Neurospora crassa]				2	1	1	0	26	100	56			No EST	No EST
45	TTTCTTTTTCTTTTTTTT		up	up	70.m15050	AN1171.1	AO070331000166	Serine/threonine protein kinase	T		0.088765	1	1	3	0	93	129	118	No EST	No EST
45	TTTCTTTTTCTTTTTTTT		up	down	57.m05520	AN4598.1	AO070267000015	LST7 amino acid permease Golgi transport protein	UE		3.41751618934886 0.255777139620395	1	1	1	0	307	239	125			No EST	No EST
45	TTTCTTTTTCTTTTTTTT		up	up	70.m15731	AN1358.1	AO070237000002	Serine/threonine protein phosphatase	T		0.088765	2	1	3	0	165	396	29	400	1
45	TTTCTTTTTCTTTTTTTT		up	down	57.m05543	AN4632.1	AO070340000375	FOG: FHA domain	T		0.088765	3	2	1	0	101	238	373			No EST	No EST
45	TTTCTTTTTCTTTTTTTT		up	up	59.m08643	AN3101.1	AO070334000142	Sensory transduction histidine kinase	T		0.088765	2	3	7	0	270	87	49	No EST	No EST
45	TTTCTTTTTCTTTTTTTT		up	up	59.m08628	AN3110.1	AO070303000041	3-phosphoinositide-dependent protein kinase (PDK1)	T		0.088765	1	2	2	0	313	106	186	391	1
45	TTTCTTTTTCTTTTTTTT		up	up	65.m07375	AN3752.1	AO070309000065	Uncharacterized conserved protein, contains TBC domain	T		0.088765	4	2	3	0	86	10	0	471	1
45	TTTCTTTTTCTTTTTTTT		up	down	71.m15694	AN4706.1	AO070329000170	Myosin class II heavy chain	Z		5.80102	1	1	1	0	113	134	185			No EST	No EST
45	TTTCTTTTTCTTTTTTTT		up	up	54.m06745	AN4189.1	AO070342000110	Mitogen-activated protein kinase kinase (MAP2K)	T		0.088765	1	2	4	0	319	27	112	No EST	No EST
45	TTTCTTTTTCTTTTTTTT		up	down	71.m15707	AN4719.1	AO070311000002	RhoGEF GTPase	T		0.088765	1	2	3	0	336	95	133			595	1
45	TTTCTTTTTCTTTTTTTT		up	up	57.m05654	AN4479.1	AO070311000025	FOG: HAMP domain	T		0.088765	2	3	7	0	314	61	82	No EST	No EST
45	TTTCTTTTTCTTTTTTTT		up	down	59.m09224	AN4759.1	AO070327000057	Guanine nucleotide exchange factor	U		3.41752	2	1	2	0	226	227	200			No EST	No EST
45	TTTCTTTTTCTTTTTTTT		up	up	57.m05648	AN4483.1	AO070311000032	Ca2+/calmodulin-dependent protein kinase, EF-Hand protein superfamily	T		0.088765	5	3	7	0	37	190	48	No EST	No EST
45	TTTCTTTTTCTTTTTTTT		up	down	59.m09211	AN4771.1	AO070329000081	WD40 repeat protein				1	1	1	0	22	7	43			No EST	No EST
45	TTTCTTTTTCTTTTTTTT		up	up	59.m08914	AN5011.1	AO070224000003	FGF receptor activating protein 1	T		0.088765	3	3	1	0	67	69	133	No EST	No EST
45	TTTCTTTTTCTTTTTTTT		up	up	58.m07516	AN5592.1	AO070328000011	Invasion-inducing protein TIAM1/CDC24 and related RhoGEF GTPases	T		0.088765	1	1	4	0	408	350	75	No EST	No EST
45	TTTCTTTTTCTTTTTTTT		up	down	59.m09157	AN4818.1	AO070327000169	Signal transduction histidine kinase	T		0.088765	1	1	1	0	103	68	226			No EST	No EST
45	TTTCTTTTTCTTTTTTTT		up	up	72.m19897	AN5849.1	AO070281000056	Serine/threonine protein kinase	T		0.088765	2	3	1	0	182	1	305	No EST	No EST
45	TTTCTTTTTCTTTTTTTT		up	down	59.m09148	AN4824.1	AO070327000153	Galactosyltransferases	G		1.06815	1	1	1	0	5	5	5			No EST	No EST
45	TTTCTTTTTCTTTTTTTT		up	up	72.m19237	AN5893.1	AO070245000013	G protein signaling regulators	T		0.088765	4	4	8	0	93	26	23	No EST	No EST
45	TTTCTTTTTCTTTTTTTT		up	up	72.m19290	AN6192.1	AO070308000109	Serine/threonine protein kinase	T		0.088765	3	3	1	0	179	49	332	No EST	No EST
45	TTTCTTTTTCTTTTTTTT		up	down	59.m08765	AN4870.1	AO070338000090	predicted protein [Neurospora crassa]				1	1	2	0	17	37	62			No EST	No EST
45	TTTCTTTTTCTTTTTTTT		up	up	72.m19409	AN6251.1	AO070304000036	Diadenosine and diphosphoinositol polyphosphate phosphohydrolase	T		0.088765	3	1	2	0	155	42	47	No EST	No EST
45	TTTCTTTTTCTTTTTTTT		up	up	72.m19330	AN6304.1	AO070308000059	Stress-activated MAP kinase-interacting protein, Sin1p	T		0.088765	1	1	1	0	217	103	80	No EST	No EST
45	TTTCTTTTTCTTTTTTTT		up	up	72.m19797	AN7252.1	AO070297000007	Adenylate cyclase, family 3 (some proteins contain HAMP domain)	T		0.088765	1	1	2	0	483	139	223	No EST	No EST
45	TTTCTTTTTCTTTTTTTT		up	up	71.m15723	AN7697.1	AO070325000104	Sensory transduction histidine kinase	T		0.088765	3	2	2	0	79	7	9	No EST	No EST
45	TTTCTTTTTCTTTTTTTT		up	up	53.m03738	AN8231.1	AO070310000077	S-adenosylmethionine decarboxylase	T		0.088765	3	1	1	1	252	104	210	9	0
45	TTTCTTTTTCTTTTTTTT		up	down	59.m08826	AN4923.1	AO070338000020	Hydroxymethylglutaryl-CoA synthase	I		3.91278	1	1	1	0	30	119	39			208	1
45	TTTCTTTTTCTTTTTTTT		up	down	59.m08828	AN4926.1	AO070338000017	hypothetical protein [Neurospora crassa]				1	1	1	0	202	340	224			No EST	No EST
45	TTTCTTTTTCTTTTTTTT		up	down	59.m08858	AN4953.1	AO070288000006	Ras-related small GTPase, Rho type				1	1	1	0	162	226	306			431	1
45	TTTCTTTTTCTTTTTTTT		up	up	58.m07325	AN5638.1	AO070342000239	OTU (ovarian tumor)-like cysteine protease	TO		0.0887649648758591 0.951548363056541	1	1	1	0	31	211	220	No EST	No EST
45	TTTCTTTTTCTTTTTTTT		up	up	58.m07434	AN3664.1	AO070342000020	C-type lectin	TV		0.0887649648758591 9.30761496067453	1	1	5	0	175	100	11	248	1
45	TTTCTTTTTCTTTTTTTT		up	down	59.m08886	AN4984.1	AO070288000052	Cyclin				4	2	3	0	54	215	196			No EST	No EST
45	TTTCTTTTTCTTTTTTTT		up	down	59.m08887	AN4985.1	AO070288000053	Serine/threonine protein kinase	T		0.088765	2	1	3	0	272	240	94			No EST	No EST
45	TTTCTTTTTCTTTTTTTT		up	up	54.m07007	AN0409.1	AO070338000252	Nischarin, modulator of integrin alpha5 subunit action	TZ		0.0887649648758591 5.80101679073153	2	3	2	0	256	6	28	No EST	No EST
45	TTTCTTTTTCTTTTTTTT		up	up	69.m15264	AN0585.1	AO070280000007	Actin regulatory protein (Wiskott-Aldrich syndrome protein)	TZ		0.0887649648758591 5.80101679073153	2	2	3	0	415	81	51	No EST	No EST
45	TTTCTTTTTCTTTTTTTT		up	up	71.m16009	AN8869.1	AO070271000002	Armadillo/beta-Catenin/plakoglobin	TZ		0.0887649648758591 5.80101679073153	1	1	1	0	348	314	373	No EST	No EST
45	TTTCTTTTTCTTTTTTTT		up	down	59.m09454	AN4997.1	AO070288000080	Phosphatidylinositol transfer protein SEC14 and related proteins	I		3.91278	1	3	1	0	267	107	15			No EST	No EST
45	TTTCTTTTTCTTTTTTTT		up	up	54.m06965	AN0261.1	AO070334000097	Vesicle coat complex COPII, subunit SEC23	U		3.41752	1	2	1	0	317	32	23	No EST	No EST
45	TTTCTTTTTCTTTTTTTT		up	up	70.m15529	AN0922.1	AO070320000101	Medium subunit of clathrin adaptor complex	U		3.41752	1	1	2	0	6	42	37	No EST	No EST
45	TTTCTTTTTCTTTTTTTT		up	up	70.m15040	AN1177.1	AO070331000173	Vesicle coat complex COPI, beta subunit	U		3.41752	1	1	2	0	42	172	27	No EST	No EST
45	TTTCTTTTTCTTTTTTTT		up	up	59.m09385	AN1309.1	AO070266000049	Vacuolar sorting protein VPS1, dynamin, and related proteins	U		3.41752	1	1	1	0	54	502	405	No EST	No EST
45	TTTCTTTTTCTTTTTTTT		up	up	57.m05726	AN1892.1	AO070341000163	Mitochondrial import inner membrane translocase, subunit TIM17	U		3.41752	3	1	1	0	3	152	304	242	1
45	TTTCTTTTTCTTTTTTTT		up	up	69.m14938	AN1921.1	AO070341000116	Peroxisomal biogenesis protein (peroxin)	U		3.41752	1	2	2	0	184	115	4	No EST	No EST
45	TTTCTTTTTCTTTTTTTT		up	up	58.m07577	AN1973.1	AO070301000057	V-SNARE	U		3.41752	1	2	1	0	271	152	335	214	1
45	TTTCTTTTTCTTTTTTTT		up	down	54.m06880	AN5141.1	AO070291000035	Superfamily II DNA and RNA helicases	LKJ		0.6349440929397 4.15828392190872 0.203093081833132	2	1	2	0	133	296	328			No EST	No EST
45	TTTCTTTTTCTTTTTTTT		up	up	72.m19699	AN2142.1	AO070343000188	Karyopherin (importin) alpha	U		3.41752	1	4	2	0	87	46	55	No EST	No EST
45	TTTCTTTTTCTTTTTTTT		up	up	59.m09076	AN2945.1	AO070337000194	Membrane coat complex Retromer, subunit VPS5/SNX1, Sorting nexins, and related PX domain-containing proteins	U		3.41752	1	2	2	0	338	123	70	18	0
45	TTTCTTTTTCTTTTTTTT		up	up	59.m08918	AN3080.1	AO070224000006	Vesicle coat complex COPII, subunit SFB3	U		3.41752	1	1	1	0	31	215	355	No EST	No EST
45	TTTCTTTTTCTTTTTTTT		up	up	69.m15505	AN5404.1	AO070333000090	Reticulon	U		3.41752	1	3	6	0	187	256	38	No EST	No EST
45	TTTCTTTTTCTTTTTTTT		up	up	72.m19327	AN6307.1	AO070308000062	Lectin VIP36, involved in the transport of glycoproteins carrying high mannose-type glycans	U		3.41752	1	1	2	0	266	64	7	No EST	No EST
45	TTTCTTTTTCTTTTTTTT		up	up	56.m02547	AN6412.1	AO070339000013	Vesicular amine transporter	U		3.41752	1	1	1	0	207	201	29	45	0
45	TTTCTTTTTCTTTTTTTT		up	down	69.m15563	AN5343.1	AO070333000181	Kinesin (SMY1 subfamily)	Z		5.80102	1	3	1	1	52	16	13			No EST	No EST
45	TTTCTTTTTCTTTTTTTT		up	up	53.m04098	AN8053.1	AO070322000147	Inositol polyphosphate 5-phosphatase and related proteins	U		3.41752	2	1	3	0	226	81	22	No EST	No EST
45	TTTCTTTTTCTTTTTTTT		up	up	71.m15748	AN7721.1	AO070325000136	Transport protein Sec61, alpha subunit	UO		3.41751618934886 0.951548363056541	2	1	2	0	44	130	129	106	0
45	TTTCTTTTTCTTTTTTTT		up	up	57.m05577	AN4544.1	AO070321000162	Dual specificity phosphatase	V		9.30761	2	1	4	0	210	325	24	No EST	No EST
45	TTTCTTTTTCTTTTTTTT		up	up	72.m19094	AN6059.1	AO070340000190	HVA22/DP1 gene product-related proteins	V		9.30761	2	2	2	0	279	123	196	No EST	No EST
45	TTTCTTTTTCTTTTTTTT		up	down	69.m15493	AN5441.1	AO070333000104	Ribosomal protein S18	J		0.203093	2	1	1	0	13	18	192			211	1
45	TTTCTTTTTCTTTTTTTT		up	up	70.m14985	AN1233.1	AO070331000247	Nucleolar GTPase/ATPase p130	Y		0.123291	2	1	2	0	324	154	30	No EST	No EST
45	TTTCTTTTTCTTTTTTTT		up	up	72.m18986	AN5857.1	AO070340000013	Nucleolar GTPase/ATPase p130	Y		0.123291	1	2	4	0	94	363	295	No EST	No EST
45	TTTCTTTTTCTTTTTTTT		up	down	69.m15461	AN5491.1	AO070341000394	Cytoplasm to vacuole targeting protein	U		3.41752	1	1	1	0	93	104	5			No EST	No EST
45	TTTCTTTTTCTTTTTTTT		up	up	72.m19015	AN6150.1	AO070340000052	Nucleolar GTPase/ATPase p130	Y		0.123291	1	1	2	0	55	370	124	No EST	No EST
45	TTTCTTTTTCTTTTTTTT		up	up	70.m15515	AN0906.1	AO070320000082	Karyopherin (importin) beta 1	YU		0.123290877849902 3.41751618934886	6	2	3	0	70	404	58	No EST	No EST
45	TTTCTTTTTCTTTTTTTT		up	down	69.m15450	AN5513.1	AO070341000383	predicted protein [Neurospora crassa]				3	1	2	0	27	213	56			No EST	No EST
45	TTTCTTTTTCTTTTTTTT		up	up	70.m15808	AN0926.1	AO070320000110	Nuclear transport receptor Karyopherin-beta2/Transportin (importin beta superfamily)	YU		0.123290877849902 3.41751618934886	2	2	1	0	18	314	156	No EST	No EST
45	TTTCTTTTTCTTTTTTTT		up	up	70.m15031	AN1190.1	AO070331000190	Nuclear pore complex, rNup107 component (sc Nup84)	YU		0.123290877849902 3.41751618934886	1	1	1	0	290	192	201	No EST	No EST
45	TTTCTTTTTCTTTTTTTT		up	down	58.m07479	AN5533.1	AO070328000058	Cell division protein	D		0.939028	1	1	1	0	82	206	144			No EST	No EST
45	TTTCTTTTTCTTTTTTTT		up	up	69.m15160	AN2120.1	AO070332000051	Karyopherin (importin) beta 3	YU		0.123290877849902 3.41751618934886	2	2	6	1	188	167	90	No EST	No EST
45	TTTCTTTTTCTTTTTTTT		up	up	58.m08920	AN5627.1	AO070301000027	Nuclear pore complex, Nup98 component (sc Nup145/Nup100/Nup116)	YU		0.123290877849902 3.41751618934886	2	2	3	0	375	16	71	No EST	No EST
45	TTTCTTTTTCTTTTTTTT		up	up	54.m06442	AN0316.1	AO070334000016	Alpha tubulin	Z		5.80102	1	2	3	0	182	196	102	27	0
45	TTTCTTTTTCTTTTTTTT		up	up	70.m15763	AN1182.1	AO070331000182	Beta tubulin	Z		5.80102	2	2	1	0	43	170	149	No EST	No EST
45	TTTCTTTTTCTTTTTTTT		up	down	58.m07499	AN5573.1	AO070328000033	predicted protein [Neurospora crassa]				1	1	2	0	38	6	3			No EST	No EST
45	TTTCTTTTTCTTTTTTTT		up	down	58.m07509	AN5588.1	AO070328000021	AAA+-type ATPase containing the peptidase M41 domain	O		0.951548	1	2	1	0	29	3	113			132	1
45	TTTCTTTTTCTTTTTTTT		up	down	58.m07508	AN5589.1	AO070328000022	Ribulose kinase and related carbohydrate kinases	G		1.06815	1	1	1	0	61	169	63			413	1
45	TTTCTTTTTCTTTTTTTT		up	up	57.m05667	AN3815.1	AO070311000013	Dystonin, GAS (Growth-arrest-specific protein), and related proteins	Z		5.80102	3	1	1	0	245	267	90	No EST	No EST
45	TTTCTTTTTCTTTTTTTT		up	down	58.m07534	AN5610.1	AO070301000010	Non-ribosomal peptide synthetase/alpha-aminoadipate reductase and related enzymes	Q		0.669353	1	0	2	0	105	0	18			No EST	No EST
45	TTTCTTTTTCTTTTTTTT		up	up	71.m15259	AN6875.1	AO070314000048	Kinesin-like protein	Z		5.80102	1	1	2	0	425	158	90	No EST	No EST
45	TTTCTTTTTCTTTTTTTT		up	up	57.m05838	AN7501.1	AO070287000012	LisH motif-containing protein	Z		5.80102	1	1	2	1	137	184	109	No EST	No EST
45	TTTCTTTTTCTTTTTTTT		up	up	71.m15420	AN0137.1	AO070321000115	Predicted starch-binding protein				2	1	2	0	113	161	92	No EST	No EST
45	TTTCTTTTTCTTTTTTTT		up	up	71.m15446	AN0173.1	AO070321000071					1	1	1	0	7	327	303	No EST	No EST
45	TTTCTTTTTCTTTTTTTT		up	down	58.m07562	AN5640.1	AO070301000036	Histone acetyltransferase (MYST family)	B		6.72132	2	1	3	0	137	69	269			No EST	No EST
45	TTTCTTTTTCTTTTTTTT		up	up	71.m15479	AN0213.1	AO070323000085					2	1	2	0	45	124	149	354	1
45	TTTCTTTTTCTTTTTTTT		up	down	58.m07334	AN5642.1	AO070342000232	predicted protein [Neurospora crassa]				1	2	1	0	186	119	121			No EST	No EST
45	TTTCTTTTTCTTTTTTTT		up	up	54.m06482	AN0287.1	AO070334000066	WD40 repeat protein				3	1	2	0	221	108	168	No EST	No EST
45	TTTCTTTTTCTTTTTTTT		up	up	69.m15290	AN0557.1	AO070272000032	Cdc4 and related F-box and WD-40 proteins				1	1	2	0	78	65	78	No EST	No EST
45	TTTCTTTTTCTTTTTTTT		up	down	54.m06840	AN5719.1	AO070324000131	60s acidic ribosomal protein P1	J		0.203093	2	2	1	1	34	38	45			438	1
45	TTTCTTTTTCTTTTTTTT		up	down	54.m06842	AN5722.1	AO070324000128	Protein phosphatase 2C/pyruvate dehydrogenase (lipoamide) phosphatase	T		0.088765	1	1	1	0	368	190	101			No EST	No EST
45	TTTCTTTTTCTTTTTTTT		up	down	54.m06848	AN5728.1	AO070324000123	Ca2+/calmodulin-dependent protein kinase kinase beta and related serine/threonine protein kinases	T		0.088765	1	1	2	0	288	155	60			528	1
45	TTTCTTTTTCTTTTTTTT		up	up	69.m15281	AN0565.1	AO070272000043	Multifunctional pyrimidine synthesis protein CAD (includes carbamoyl-phophate synthetase, aspartate transcarbamylase, and glutamine amidotransferase)				2	1	1	0	43	326	205	No EST	No EST
45	TTTCTTTTTCTTTTTTTT		up	down	69.m15631	AN5745.1	AO070341000002	Translation initiation factor eIF3, p35 subunit	J		0.203093	1	1	1	0	48	42	47			221	1
45	TTTCTTTTTCTTTTTTTT		up	down	69.m14851	AN5753.1	AO070329000011					1	1	1	0	311	201	194			372	1
45	TTTCTTTTTCTTTTTTTT		up	up	70.m15259	AN0655.1	AO070343000571	hypothetical protein [Neurospora crassa]				1	1	2	0	240	312	235	No EST	No EST
45	TTTCTTTTTCTTTTTTTT		up	up	70.m15292	AN0689.1	AO070343000524	acetate regulatory DNA binding protein FacB [Emericella nidulans]				1	1	1	0	224	212	217	No EST	No EST
45	TTTCTTTTTCTTTTTTTT		up	up	70.m15369	AN0766.1	AO070316000078	hypothetical protein [Novosphingobium aromaticivorans]				3	1	5	0	53	350	67	377	1
45	TTTCTTTTTCTTTTTTTT		up	down	72.m18953	AN5822.1	AO070260000020	Cyclin-dependent kinase WEE1	D		0.939028	2	1	2	0	322	401	142			No EST	No EST
45	TTTCTTTTTCTTTTTTTT		up	up	70.m15407	AN0806.1	AO070239000011	WD40 repeat protein				2	2	3	0	366	130	8	379	1
45	TTTCTTTTTCTTTTTTTT		up	up	70.m15424	AN0823.1	AO070255000022	Uncharacterized conserved protein				3	1	1	0	14	281	382	No EST	No EST
45	TTTCTTTTTCTTTTTTTT		up	down	72.m18960	AN5832.1	AO070260000013	Ras-related GTPase				1	1	4	0	184	238	210			28	0
45	TTTCTTTTTCTTTTTTTT		up	up	70.m15460	AN0867.1	AO070320000018	hypothetical protein [Neurospora crassa]				1	1	2	0	87	422	127	No EST	No EST
45	TTTCTTTTTCTTTTTTTT		up	down	72.m19916	AN5836.1	AO070340000001	RNA polymerase II, large subunit	K		4.15828	1	1	1	0	165	17	62			No EST	No EST
45	TTTCTTTTTCTTTTTTTT		up	up	70.m15535	AN0928.1	AO070320000113	hypothetical protein ( (AL451014) putative protein [Neurospora crassa] )				2	1	2	0	130	5	61	No EST	No EST
45	TTTCTTTTTCTTTTTTTT		up	up	70.m15609	AN0973.1	AO070320000174	FOG: Zn-finger				4	1	5	0	87	256	13	103	0
45	TTTCTTTTTCTTTTTTTT		up	down	72.m18986	AN5857.1	AO070340000013	Nucleolar GTPase/ATPase p130	Y		0.123291	1	1	1	0	450	0	85			No EST	No EST
45	TTTCTTTTTCTTTTTTTT		up	up	70.m15626	AN0986.1	AO070318000155	PHD Zn-finger proteins				3	2	2	0	208	2	245	No EST	No EST
45	TTTCTTTTTCTTTTTTTT		up	up	70.m15236	AN1018.1	AO070343000597	Uncharacterized conserved protein				1	1	1	0	100	164	272	No EST	No EST
45	TTTCTTTTTCTTTTTTTT		up	down	72.m19239	AN5891.1	AO070245000016	PHD Zn-finger proteins				1	1	1	0	55	247	151			344	1
45	TTTCTTTTTCTTTTTTTT		up	up	70.m15201	AN1045.1	AO070336000078	FOG: RRM domain				2	1	1	0	43	427	94	192	0
45	TTTCTTTTTCTTTTTTTT		up	down	72.m19237	AN5893.1	AO070245000013	G protein signaling regulators	T		0.088765	1	1	1	0	263	279	424			No EST	No EST
45	TTTCTTTTTCTTTTTTTT		up	down	72.m19953	AN5915.1	AO070340000372	Golgi proteins involved in ER retention (RER)	U		3.41752	1	2	2	0	197	26	161			425	1
45	TTTCTTTTTCTTTTTTTT		up	up	70.m15143	AN1089.1	AO070285000061	Thioredoxin binding protein TBP-2/VDUP1				3	2	5	0	107	317	60	No EST	No EST
45	TTTCTTTTTCTTTTTTTT		up	up	70.m15141	AN1091.1	AO070285000058	FOG: RRM domain				2	2	4	0	241	225	32	No EST	No EST
45	TTTCTTTTTCTTTTTTTT		up	down	72.m19202	AN5929.1	AO070340000354	Calcium-responsive transcription coactivator	K		4.15828	1	2	1	0	202	174	237			No EST	No EST
45	TTTCTTTTTCTTTTTTTT		up	up	70.m14958	AN1261.1	AO070214000004	hypothetical protein [Neurospora crassa]				1	2	3	0	13	188	260	No EST	No EST
45	TTTCTTTTTCTTTTTTTT		up	up	70.m14896	AN1337.1	AO070303000102	predicted protein [Neurospora crassa]				2	1	1	0	108	141	135	No EST	No EST
45	TTTCTTTTTCTTTTTTTT		up	down	72.m19186	AN5970.1	AO070340000328	Thioredoxin/protein disulfide isomerase	O		0.951548	2	1	1	0	34	62	40			48	0
45	TTTCTTTTTCTTTTTTTT		up	up	70.m14875	AN1355.1	AO070237000005	Permease of the drug/metabolite transporter (DMT) superfamily				1	1	3	0	176	256	0	No EST	No EST
45	TTTCTTTTTCTTTTTTTT		up	up	70.m14845	AN1378.1	AO070243000008	predicted protein [Neurospora crassa]				1	2	2	1	270	158	226	189	1
45	TTTCTTTTTCTTTTTTTT		up	up	70.m14839	AN1382.1	AO070243000014	hypothetical protein [Neurospora crassa]				1	1	1	0	194	103	123	No EST	No EST
45	TTTCTTTTTCTTTTTTTT		up	down	72.m19109	AN6050.1	AO070340000215					1	1	1	0	163	194	39			No EST	No EST
45	TTTCTTTTTCTTTTTTTT		up	up	55.m02933	AN1423.1	AO070232000019	Permease of the major facilitator superfamily				2	0	3	0	158	0	155	No EST	No EST
45	TTTCTTTTTCTTTTTTTT		up	up	55.m02928	AN1427.1	AO070242000025	Uncharacterized conserved protein				1	2	5	0	349	236	108	419	1
45	TTTCTTTTTCTTTTTTTT		up	up	55.m02945	AN1438.1	AO070232000003	hypothetical protein [Neurospora crassa]				2	2	2	0	253	180	50	No EST	No EST
45	TTTCTTTTTCTTTTTTTT		up	up	55.m03059	AN1540.1	AO070334000264	predicted protein [Neurospora crassa]				1	2	1	0	258	207	395	No EST	No EST
45	TTTCTTTTTCTTTTTTTT		up	down	72.m19931	AN6118.1	AO070340000086	Amino acid transporters	E		0.255777	1	1	1	0	27	306	167			No EST	No EST
45	TTTCTTTTTCTTTTTTTT		up	down	72.m19029	AN6136.1	AO070340000066	Protein involved in mRNA turnover and stability	A		1.2493	1	1	2	0	34	55	84			No EST	No EST
45	TTTCTTTTTCTTTTTTTT		up	up	58.m07732	AN1666.1	AO070299000048	Nucleolar GTPase				1	2	1	0	94	69	72	122	1
45	TTTCTTTTTCTTTTTTTT		up	down	72.m19900	AN6168.1	AO070340000030	NADP+-dependent malic enzyme	C		0.327087	1	1	1	0	0	134	0			No EST	No EST
45	TTTCTTTTTCTTTTTTTT		up	up	58.m07663	AN1847.1	AO070292000057					2	2	2	0	14	214	209	248	1
45	TTTCTTTTTCTTTTTTTT		up	up	57.m05742	AN1876.1	AO070341000183	Predicted membrane protein, contains two CBS domains				1	1	1	0	15	375	356	No EST	No EST
45	TTTCTTTTTCTTTTTTTT		up	up	58.m07338	AN1955.1	AO070342000226					2	1	2	0	170	188	146	49	0
45	TTTCTTTTTCTTTTTTTT		up	down	72.m19294	AN6196.1	AO070308000103					1	2	2	0	0	109	26			No EST	No EST
45	TTTCTTTTTCTTTTTTTT		up	up	58.m07337	AN1956.1	AO070342000227	Predicted helicase				1	1	1	0	71	15	112	No EST	No EST
45	TTTCTTTTTCTTTTTTTT		up	up	58.m07568	AN1963.1	AO070301000044					1	3	1	0	487	44	79	No EST	No EST
45	TTTCTTTTTCTTTTTTTT		up	down	72.m19306	AN6208.1	AO070308000085					1	1	1	0	158	76	223			164	1
45	TTTCTTTTTCTTTTTTTT		up	up	58.m08942	AN2011.1	AO070202000001	P-type ATPase				1	2	3	0	18	101	183	No EST	No EST
45	TTTCTTTTTCTTTTTTTT		up	down	72.m19434	AN6221.1	AO070304000053	GATA-4/5/6 transcription factors	K		4.15828	2	1	2	0	187	219	193			No EST	No EST
45	TTTCTTTTTCTTTTTTTT		up	down	72.m19980	AN6247.1	AO070304000102	predicted protein [Neurospora crassa]				1	1	1	0	250	8	249			No EST	No EST
45	TTTCTTTTTCTTTTTTTT		up	up	58.m07624	AN2016.1	AO070202000009	amyR [Emericella nidulans]				1	1	3	0	262	342	305	No EST	No EST
45	TTTCTTTTTCTTTTTTTT		up	down	72.m19981	AN6254.1	AO070304000034	Mitochondrial oxoglutarate/malate carrier proteins	C		0.327087	1	1	1	0	256	361	0			No EST	No EST
45	TTTCTTTTTCTTTTTTTT		up	down	72.m19395	AN6262.1	AO070304000027	predicted protein [Neurospora crassa]				1	1	2	0	138	66	19			220	1
45	TTTCTTTTTCTTTTTTTT		up	up	58.m07632	AN2044.1	AO070292000011	hypothetical protein [Neurospora crassa]				1	2	1	0	346	88	20	7	0
45	TTTCTTTTTCTTTTTTTT		up	down	72.m19363	AN6277.1	AO070304000003	Synaptic vesicle transporter SVOP and related transporters (major facilitator superfamily)				1	1	1	0	219	158	171			No EST	No EST
45	TTTCTTTTTCTTTTTTTT		up	up	58.m07643	AN2055.1	AO070292000025	hypothetical protein [Neurospora crassa]				4	2	4	0	106	263	21	No EST	No EST
45	TTTCTTTTTCTTTTTTTT		up	up	58.m07644	AN2056.1	AO070292000026	Uncharacterized conserved protein				1	2	1	0	44	260	263	No EST	No EST
45	TTTCTTTTTCTTTTTTTT		up	up	57.m05773	AN2070.1	AO070341000226	PHD finger protein AF10				1	1	1	0	310	131	0	No EST	No EST
45	TTTCTTTTTCTTTTTTTT		up	up	72.m19709	AN2132.1	AO070278000027	predicted protein [Neurospora crassa]				1	1	1	0	175	200	14	No EST	No EST
45	TTTCTTTTTCTTTTTTTT		up	down	72.m19508	AN6347.1	AO070275000012	Serine/threonine protein kinase				1	2	3	0	42	5	122			No EST	No EST
45	TTTCTTTTTCTTTTTTTT		up	down	72.m19507	AN6348.1	AO070275000017	Mitochondrial import inner membrane translocase, subunit TIM23	U		3.41752	2	1	1	0	148	450	159			No EST	No EST
45	TTTCTTTTTCTTTTTTTT		up	up	69.m14881	AN2190.1	AO070247000014	Predicted methyltransferase				1	2	3	0	279	9	22	No EST	No EST
45	TTTCTTTTTCTTTTTTTT		up	down	62.m03439	AN6500.1	AO070222000014	60S ribosomal protein L28	J		0.203093	1	1	1	0	146	150	153			212	1
45	TTTCTTTTTCTTTTTTTT		up	up	71.m15846	AN2219.1	AO070326000185	related to ahmp1 protein [MIPS] [Neurospora crassa]				1	1	2	0	12	286	13	No EST	No EST
45	TTTCTTTTTCTTTTTTTT		up	down	62.m03095	AN6508.1	AO070270000001	Glycogen synthase kinase-3	G		1.06815	2	1	4	0	225	223	232			45	0
45	TTTCTTTTTCTTTTTTTT		up	up	71.m15877	AN2243.1	AO070326000130	Multifunctional pyrimidine synthesis protein CAD (includes carbamoyl-phophate synthetase, aspartate transcarbamylase, and glutamine amidotransferase)				1	1	2	0	377	381	62	307	0
45	TTTCTTTTTCTTTTTTTT		up	up	71.m15889	AN2251.1	AO070326000115	Predicted membrane protein				2	1	2	0	125	276	12	No EST	No EST
45	TTTCTTTTTCTTTTTTTT		up	up	71.m15938	AN2290.1	AO070295000069	FOG: Zn-finger				3	2	3	0	173	7	15	No EST	No EST
45	TTTCTTTTTCTTTTTTTT		up	up	59.m08497	AN2492.1	AO070312000128	Uncharacterized conserved protein				1	3	3	0	15	81	47	128	1
45	TTTCTTTTTCTTTTTTTT		up	down	62.m03155	AN6568.1	AO070326000011	Uncharacterized conserved protein				2	1	2	0	56	169	74			No EST	No EST
45	TTTCTTTTTCTTTTTTTT		up	down	62.m03168	AN6574.1	AO070326000017	E3 ubiquitin ligase involved in syntaxin degradation	O		0.951548	1	1	1	0	101	44	96			No EST	No EST
45	TTTCTTTTTCTTTTTTTT		up	down	62.m03177	AN6588.1	AO070326000036					1	1	2	0	331	320	313			No EST	No EST
45	TTTCTTTTTCTTTTTTTT		up	up	59.m08697	AN2855.1	AO070338000169	FOG: Zn-finger				4	2	2	0	88	200	104	180	0
45	TTTCTTTTTCTTTTTTTT		up	up	59.m08714	AN2869.1	AO070338000153	Predicted transporter (major facilitator superfamily)				3	2	1	0	105	282	332	No EST	No EST
45	TTTCTTTTTCTTTTTTTT		up	up	59.m08919	AN3079.1	AO070224000007					2	1	3	0	148	237	129	139	0
45	TTTCTTTTTCTTTTTTTT		up	up	59.m08644	AN3100.1	AO070334000141	predicted protein [Neurospora crassa]				1	2	1	0	213	210	307	106	0
45	TTTCTTTTTCTTTTTTTT		up	up	59.m08623	AN3114.1	AO070303000035	predicted protein [Neurospora crassa]				2	2	3	0	142	132	257	No EST	No EST
45	TTTCTTTTTCTTTTTTTT		up	down	65.m07300	AN6680.1	AO070289000022	predicted protein [Neurospora crassa]				1	1	2	0	115	88	10			No EST	No EST
45	TTTCTTTTTCTTTTTTTT		up	down	65.m07490	AN6696.1	AO070339000127	hypothetical protein [Neurospora crassa]				1	2	2	0	98	63	94			No EST	No EST
45	TTTCTTTTTCTTTTTTTT		up	up	59.m08614	AN3122.1	AO070303000025	hypothetical protein [Neurospora crassa]				1	1	1	0	173	159	143	254	1
45	TTTCTTTTTCTTTTTTTT		up	up	66.m04639	AN3371.1	AO070281000010	predicted protein [Neurospora crassa]				3	2	3	0	329	310	81	No EST	No EST
45	TTTCTTTTTCTTTTTTTT		up	up	58.m07398	AN3600.1	AO070342000153	hypothetical protein [Neurospora crassa]				1	2	3	0	454	305	212	276	0
45	TTTCTTTTTCTTTTTTTT		up	up	54.m06552	AN4019.1	AO070328000118	Permease of the major facilitator superfamily				1	3	1	0	489	10	112	No EST	No EST
45	TTTCTTTTTCTTTTTTTT		up	up	58.m07369	AN4148.1	AO070342000182	Predicted transporter (major facilitator superfamily)				1	2	3	0	140	301	257	No EST	No EST
45	TTTCTTTTTCTTTTTTTT		up	down	71.m15289	AN6828.1	AO070314000111	Nucleolar GTPase/ATPase p130	Y		0.123291	2	2	3	0	4	28	15			No EST	No EST
45	TTTCTTTTTCTTTTTTTT		up	up	69.m15618	AN4170.1	AO070341000092	Thioredoxin binding protein TBP-2/VDUP1				1	1	4	0	142	308	94	No EST	No EST
45	TTTCTTTTTCTTTTTTTT		up	up	69.m14953	AN4171.1	AO070341000090	hypothetical protein [Neurospora crassa]				3	1	1	0	33	206	95	No EST	No EST
45	TTTCTTTTTCTTTTTTTT		up	down	71.m15255	AN6880.1	AO070314000044	Inositol polyphosphate multikinase, component of the ARGR transcription regulatory complex	KIT		4.15828392190872 3.91278222556957 0.0887649648758591	1	1	3	0	229	60	43			No EST	No EST
45	TTTCTTTTTCTTTTTTTT		up	up	58.m08982	AN4411.1	AO070273000031	hypothetical protein ( (AL513462) related to Sts1 protein [Neurospora crassa] )				3	2	3	0	127	86	88	No EST	No EST
45	TTTCTTTTTCTTTTTTTT		up	down	71.m15234	AN6902.1	AO070314000013	Protein involved in mRNA turnover	A		1.2493	1	1	1	0	17	21	39			No EST	No EST
45	TTTCTTTTTCTTTTTTTT		up	up	57.m05647	AN4484.1	AO070311000033	PHD finger protein				3	1	3	0	159	455	81	No EST	No EST
45	TTTCTTTTTCTTTTTTTT		up	up	57.m05645	AN4486.1	AO070311000037	hypothetical protein [Neurospora crassa]				1	2	1	0	243	129	296	No EST	No EST
45	TTTCTTTTTCTTTTTTTT		up	up	57.m05570	AN4558.1	AO070321000170	hypothetical protein [Neurospora crassa]				1	1	2	0	256	263	128	No EST	No EST
45	TTTCTTTTTCTTTTTTTT		up	down	72.m19795	AN7254.1	AO070297000010	AAA+-type ATPase	O		0.951548	1	1	1	0	141	1	16			136	1
45	TTTCTTTTTCTTTTTTTT		up	down	72.m19770	AN7296.1	AO070297000039	Sister chromatid cohesion complex Cohesin, subunit PDS5	D		0.939028	2	2	2	0	103	6	220			No EST	No EST
45	TTTCTTTTTCTTTTTTTT		up	up	71.m15672	AN4689.1	AO070284000044					1	1	1	0	234	55	174	No EST	No EST
45	TTTCTTTTTCTTTTTTTT		up	down	72.m19727	AN7350.1	AO070278000050	FOG: RRM domain				2	1	2	0	465	317	335			No EST	No EST
45	TTTCTTTTTCTTTTTTTT		up	down	72.m20006	AN7352.1	AO070278000048	E3 ubiquitin ligase involved in syntaxin degradation	O		0.951548	1	1	1	0	21	205	45			280	1
45	TTTCTTTTTCTTTTTTTT		up	down	57.m05902	AN7441.1	AO070229000013	Actin-related protein - Arp4p/Act3p	Z		5.80102	1	3	1	0	192	21	105			453	1
45	TTTCTTTTTCTTTTTTTT		up	down	57.m05889	AN7454.1	AO070287000072	hypothetical protein [Neurospora crassa]				2	2	1	0	121	183	23			No EST	No EST
45	TTTCTTTTTCTTTTTTTT		up	up	71.m15704	AN4716.1	AO070311000005	hypothetical protein [Neurospora crassa]				2	1	2	0	379	133	113	No EST	No EST
45	TTTCTTTTTCTTTTTTTT		up	up	59.m09236	AN4743.1	AO070327000077	Ras-related small GTPase, Rho type				3	4	4	0	233	200	89	100	0
45	TTTCTTTTTCTTTTTTTT		up	up	59.m09204	AN4779.1	AO070329000071	NIPSNAP1 protein				2	2	2	0	137	56	35	No EST	No EST
45	TTTCTTTTTCTTTTTTTT		up	down	57.m05861	AN7480.1	AO070287000037	FOG: RRM domain				1	2	3	0	272	256	164			No EST	No EST
45	TTTCTTTTTCTTTTTTTT		up	up	59.m09162	AN4814.1	AO070329000018	Predicted membrane protein				2	2	2	0	191	277	141	No EST	No EST
45	TTTCTTTTTCTTTTTTTT		up	down	72.m19562	AN7545.1	AO070277000042	CCAAT-binding factor, subunit B (HAP2)	K		4.15828	1	2	3	0	362	13	59			304	1
45	TTTCTTTTTCTTTTTTTT		up	up	59.m09409	AN4880.1	AO070338000081	Jacalin-like lectin domain-containing protein				2	1	2	0	168	444	178	No EST	No EST
45	TTTCTTTTTCTTTTTTTT		up	up	59.m08812	AN4908.1	AO070338000038	Uncharacterized protein CLU1/cluA/TIF31 involved in mitochondrial morphology/distribution, also found associated with eIF-3				2	2	1	0	130	68	151	No EST	No EST
45	TTTCTTTTTCTTTTTTTT		up	up	59.m08815	AN4912.1	AO070338000036	hypothetical protein [Neurospora crassa]				2	1	1	0	3	485	189	No EST	No EST
45	TTTCTTTTTCTTTTTTTT		up	up	59.m08878	AN4975.1	AO070288000042	FAD-dependent oxidoreductase				1	1	1	0	60	156	23	No EST	No EST
45	TTTCTTTTTCTTTTTTTT		up	up	59.m08886	AN4984.1	AO070288000052	Cyclin				2	2	2	0	12	156	59	74	0
45	TTTCTTTTTCTTTTTTTT		up	up	59.m08894	AN4991.1	AO070288000071	aureobasidin-resistance protein; AurA [Aspergillus nidulans]				1	2	1	0	435	106	46	420	1
45	TTTCTTTTTCTTTTTTTT		up	up	59.m08896	AN4993.1	AO070288000076	N-acetyltransferase				2	1	2	0	30	10	35	No EST	No EST
45	TTTCTTTTTCTTTTTTTT		up	up	59.m08680	AN5026.1	AO070338000185	PHD finger protein AF10				3	2	1	0	315	126	68	No EST	No EST
45	TTTCTTTTTCTTTTTTTT		up	down	71.m15822	AN7628.1	AO070294000038	mRNA deadenylase subunit	A		1.2493	1	2	3	0	322	75	79			414	1
45	TTTCTTTTTCTTTTTTTT		up	up	59.m08678	AN5048.1	AO070338000188	Transcription factor, contains HOX domain				1	2	2	0	71	356	208	138	0
45	TTTCTTTTTCTTTTTTTT		up	up	54.m06882	AN5140.1	AO070291000036	Permease of the major facilitator superfamily				1	1	2	0	91	463	151	No EST	No EST
45	TTTCTTTTTCTTTTTTTT		up	down	57.m05947	AN7681.1	AO070325000071	Mod5 protein sorting/negative effector of RNA Pol III synthesis	K		4.15828	2	1	2	0	30	25	37			No EST	No EST
45	TTTCTTTTTCTTTTTTTT		up	up	54.m06862	AN5156.1	AO070291000011	Cyclin				2	1	3	0	145	451	297	No EST	No EST
45	TTTCTTTTTCTTTTTTTT		up	down	71.m15720	AN7698.1	AO070325000103	Myosin class I heavy chain	Z		5.80102	3	3	1	0	17	12	27			311	1
45	TTTCTTTTTCTTTTTTTT		up	down	71.m15729	AN7700.1	AO070325000106	FOG: RRM domain				2	2	2	0	197	74	243			No EST	No EST
45	TTTCTTTTTCTTTTTTTT		up	up	57.m05706	AN5226.1	AO070337000252	Predicted membrane protein				5	2	4	0	200	319	58	No EST	No EST
45	TTTCTTTTTCTTTTTTTT		up	up	71.m15778	AN5236.1	AO070325000177	Predicted membrane protein				1	2	1	0	254	22	26	No EST	No EST
45	TTTCTTTTTCTTTTTTTT		up	down	53.m03863	AN8016.1	AO070322000065	Predicted ATP-dependent RNA helicase FAL1, involved in rRNA maturation, DEAD-box superfamily	J		0.203093	1	2	2	0	337	203	110			251	1
45	TTTCTTTTTCTTTTTTTT		up	up	69.m15506	AN5405.1	AO070333000118	predicted protein [Neurospora crassa]				2	2	1	0	156	137	109	No EST	No EST
45	TTTCTTTTTCTTTTTTTT		up	up	69.m15524	AN5407.1	AO070333000121	Predicted GTPase activator NB4S/EVI5 (contains TBC domain)/Calmodulin-binding protein Pollux (contains PTB and TBC domains)				3	1	1	0	143	274	155	No EST	No EST
45	TTTCTTTTTCTTTTTTTT		up	up	69.m15489	AN5445.1	AO070333000112					1	2	1	0	280	256	217	No EST	No EST
45	TTTCTTTTTCTTTTTTTT		up	down	53.m03908	AN8038.1	AO070330000008	mRNA cleavage and polyadenylation factor I complex, subunit RNA15	A		1.2493	2	3	2	0	164	11	14			No EST	No EST
45	TTTCTTTTTCTTTTTTTT		up	down	53.m03907	AN8039.1	AO070330000007	Histone 2A	B		6.72132	2	2	2	0	252	326	125			383	1
45	TTTCTTTTTCTTTTTTTT		up	up	58.m07489	AN5563.1	AO070328000044	Aldo/keto reductase family proteins				1	1	1	0	533	352	434	278	0
45	TTTCTTTTTCTTTTTTTT		up	up	58.m07499	AN5573.1	AO070328000033	predicted protein [Neurospora crassa]				2	1	6	1	248	272	108	No EST	No EST
45	TTTCTTTTTCTTTTTTTT		up	up	58.m07334	AN5642.1	AO070342000232	predicted protein [Neurospora crassa]				2	3	3	0	193	38	33	No EST	No EST
45	TTTCTTTTTCTTTTTTTT		up	up	54.m06835	AN5716.1	AO070324000136	FOG: CBS domain				1	1	1	0	130	224	100	30	0
45	TTTCTTTTTCTTTTTTTT		up	down	53.m03888	AN8055.1	AO070322000145	RNA-binding Ran Zn-finger protein and related proteins				1	2	3	0	223	44	224			No EST	No EST
45	TTTCTTTTTCTTTTTTTT		up	up	69.m14857	AN5740.1	AO070341000019	Ras-related small GTPase, Rho type				3	2	2	0	266	408	271	83	0
45	TTTCTTTTTCTTTTTTTT		up	up	69.m14853	AN5755.1	AO070341000014	hypothetical protein ( related to a-agglutinin core protein AGA1 [imported] - Neurospora crassa )				1	3	2	0	553	12	1	575	1
45	TTTCTTTTTCTTTTTTTT		up	down	56.m02396	AN8105.1	AO070323000021	Non-ribosomal peptide synthetase modules and related proteins	Q		0.669353	1	2	1	0	26	89	364			No EST	No EST
45	TTTCTTTTTCTTTTTTTT		up	up	72.m18960	AN5832.1	AO070260000013	Ras-related GTPase				3	2	5	0	85	16	14	No EST	No EST
45	TTTCTTTTTCTTTTTTTT		up	down	53.m03799	AN8181.1	AO070310000145	predicted protein [Neurospora crassa]				2	1	1	0	85	93	130			No EST	No EST
45	TTTCTTTTTCTTTTTTTT		up	up	72.m19214	AN5917.1	AO070340000369	Predicted transporter (major facilitator superfamily)				2	1	2	0	316	52	484	No EST	No EST
45	TTTCTTTTTCTTTTTTTT		up	up	72.m19965	AN5966.1	AO070340000323	FOG: Zn-finger				1	2	2	0	210	193	248	438	1
45	TTTCTTTTTCTTTTTTTT		up	up	72.m19109	AN6050.1	AO070340000215					3	1	3	0	61	354	0	No EST	No EST
45	TTTCTTTTTCTTTTTTTT		up	up	72.m19074	AN6084.1	AO070340000134	predicted protein [Neurospora crassa]				1	1	3	0	195	119	83	No EST	No EST
45	TTTCTTTTTCTTTTTTTT		up	up	72.m19295	AN6195.1	AO070308000098	FOG: Zn-finger				4	4	4	0	405	32	1	386	1
45	TTTCTTTTTCTTTTTTTT		up	up	72.m19303	AN6204.1	AO070308000089	cell wall beta-glucan assembly; Kre6p [Saccharomyces cerevisiae]				1	1	2	0	471	82	81	No EST	No EST
45	TTTCTTTTTCTTTTTTTT		up	down	53.m03716	AN8251.1	AO070310000057	putative transcriptional activator [Aspergillus nidulans]				2	1	3	0	41	36	40			No EST	No EST
45	TTTCTTTTTCTTTTTTTT		up	down	53.m03696	AN8261.1	AO070310000040	Protein kinase PCTAIRE and related kinases				1	1	3	0	30	47	31			No EST	No EST
45	TTTCTTTTTCTTTTTTTT		up	up	72.m19306	AN6208.1	AO070308000085					4	3	2	0	362	164	162	270	1
45	TTTCTTTTTCTTTTTTTT		up	down	53.m03693	AN8268.1	AO070310000034	RasGAP SH3 binding protein rasputin, contains NTF2 and RRM domains	T		0.088765	2	2	6	0	15	378	6			No EST	No EST
45	TTTCTTTTTCTTTTTTTT		up	up	72.m19316	AN6217.1	AO070308000074	Cdc4 and related F-box and WD-40 proteins				1	2	3	0	316	95	109	No EST	No EST
45	TTTCTTTTTCTTTTTTTT		up	up	72.m19363	AN6277.1	AO070304000003	Synaptic vesicle transporter SVOP and related transporters (major facilitator superfamily)				2	3	5	0	191	51	131	No EST	No EST
45	TTTCTTTTTCTTTTTTTT		up	up	72.m19339	AN6295.1	AO070308000053	predicted protein [Neurospora crassa]				1	1	2	0	397	86	100	No EST	No EST
45	TTTCTTTTTCTTTTTTTT		up	up	62.m03118	AN6530.1	AO070270000030	Predicted membrane protein				2	1	2	0	39	122	69	No EST	No EST
45	TTTCTTTTTCTTTTTTTT		up	up	62.m03135	AN6538.1	AO070270000046	LRR-containing protein				3	4	1	0	48	42	231	No EST	No EST
45	TTTCTTTTTCTTTTTTTT		up	up	62.m03196	AN6601.1	AO070326000052	Transmembrane protein				1	1	1	0	52	124	106	No EST	No EST
45	TTTCTTTTTCTTTTTTTT		up	up	62.m03234	AN6639.1	AO070326000091	Uncharacterized protein involved in propionate catabolism				3	3	1	0	9	233	240	21	0
45	TTTCTTTTTCTTTTTTTT		up	up	71.m15293	AN6823.1	AO070314000102	hypothetical protein ( (AL513443) hypothetical protein [Neurospora crassa] )				2	1	2	0	391	92	72	288	1
45	TTTCTTTTTCTTTTTTTT		up	up	71.m15271	AN6858.1	AO070314000075	predicted protein [Neurospora crassa]				3	2	1	0	189	187	283	No EST	No EST
45	TTTCTTTTTCTTTTTTTT		up	down	62.m03362	AN8707.1	AO070315000134	Fumarase	C		0.327087	1	3	1	0	131	103	380			116	1
45	TTTCTTTTTCTTTTTTTT		up	down	62.m03358	AN8710.1	AO070315000137	FOG: Low-complexity				1	1	1	0	118	131	31			No EST	No EST
45	TTTCTTTTTCTTTTTTTT		up	down	62.m03343	AN8723.1	AO070315000151	predicted protein [Neurospora crassa]				1	1	2	0	364	49	188			No EST	No EST
45	TTTCTTTTTCTTTTTTTT		up	up	72.m19729	AN7348.1	AO070278000051	Uncharacterized conserved protein				1	2	2	0	104	172	139	No EST	No EST
45	TTTCTTTTTCTTTTTTTT		up	down	62.m03339	AN8741.1	AO070250000041	FOG: Zn-finger				1	1	1	0	110	31	32			No EST	No EST
45	TTTCTTTTTCTTTTTTTT		up	up	57.m05873	AN7471.1	AO070287000055	Predicted carbohydrate kinase, contains PfkB domain				1	1	1	0	81	38	85	No EST	No EST
45	TTTCTTTTTCTTTTTTTT		up	up	57.m05861	AN7480.1	AO070287000037	FOG: RRM domain				1	2	3	0	216	348	71	No EST	No EST
45	TTTCTTTTTCTTTTTTTT		up	up	72.m19651	AN7610.1	AO070343000266	putative transcription factor [Emericella nidulans]				2	1	4	0	327	149	79	No EST	No EST
45	TTTCTTTTTCTTTTTTTT		up	down	65.m07308	AN8785.1	AO070289000010	Mitochondrial aspartate/glutamate carrier protein Aralar/Citrin (contains EF-hand Ca2+-binding domains)	C		0.327087	2	1	2	0	26	118	71			No EST	No EST
45	TTTCTTTTTCTTTTTTTT		up	up	71.m15859	AN7623.1	AO070294000020	hypothetical protein [Neurospora crassa]				1	1	1	0	125	39	281	No EST	No EST
45	TTTCTTTTTCTTTTTTTT		up	down	71.m15957	AN8825.1	AO070271000056	Clathrin coat binding protein/Huntingtin interacting protein HIP1, involved in regulation of endocytosis	U		3.41752	1	3	1	0	91	38	212			No EST	No EST
45	TTTCTTTTTCTTTTTTTT		up	up	57.m05419	AN7657.1	AO070268000020	GEL1 protein [Aspergillus fumigatus]				2	3	2	0	90	305	346	158	0
45	TTTCTTTTTCTTTTTTTT		up	down	71.m15961	AN8830.1	AO070271000049	Checkpoint kinase and related serine/threonine protein kinases	D		0.939028	1	2	3	0	471	151	344			327	1
45	TTTCTTTTTCTTTTTTTT		up	down	71.m15980	AN8846.1	AO070271000030	Protein involved in beta-1,3-glucan synthesis	G		1.06815	1	1	2	0	16	148	328			165	1
45	TTTCTTTTTCTTTTTTTT		up	up	53.m03888	AN8055.1	AO070322000145	RNA-binding Ran Zn-finger protein and related proteins				5	4	3	1	48	181	95	No EST	No EST
45	TTTCTTTTTCTTTTTTTT		up	down	71.m16001	AN8863.1	AO070271000008	Nucleosome assembly protein NAP-1	BD		6.72131997613286 0.939027978679397	2	3	2	0	224	67	267			No EST	No EST
45	TTTCTTTTTCTTTTTTTT		up	up	53.m03775	AN8200.1	AO070310000119	hypothetical protein ( (AL513466) putative protein [Neurospora crassa] )				1	1	1	0	228	33	186	No EST	No EST
45	TTTCTTTTTCTTTTTTTT		up	up	53.m03716	AN8251.1	AO070310000057	putative transcriptional activator [Aspergillus nidulans]				3	1	2	0	311	192	177	No EST	No EST
45	TTTCTTTTTCTTTTTTTT		up	up	53.m04209	AN8262.1	AO070310000038	related to G protein coupled receptor like protein [Neurospora crassa]				1	1	1	0	107	73	117	No EST	No EST
45	TTTCTTTTTCTTTTTTTT		up	up	72.m19891	AN8312.1	AO070307000026	Neutral protease II precursor (Deuterolysin) (NPII)				1	1	1	0	92	419	501	No EST	No EST
45	TTTCTTTTTCTTTTTTTT		up	up	62.m03339	AN8741.1	AO070250000041	FOG: Zn-finger				2	2	1	0	64	36	109	No EST	No EST
45	TTTCTTTTTCTTTTTTTT		up	down	66.m04555	AN9096.1	AO070332000179					3	2	5	0	38	35	60			370	1
45	TTTCTTTTTCTTTTTTTT		up	up	62.m03324	AN8751.1	AO070250000011	NDR and related serine/threonine kinases				4	2	4	0	35	11	10	No EST	No EST
45	TTTCTTTTTCTTTTTTTT		up	up	71.m15604	AN8797.1	AO070276000063	hypothetical protein ( (AL513442) conserved hypothetical protein [Neurospora crassa] )				1	1	3	0	310	302	171	No EST	No EST
45	TTTCTTTTTCTTTTTTTT		up	up	71.m15985	AN8850.1	AO070271000026	Uncharacterized conserved protein				1	1	2	0	128	3	80	No EST	No EST
45	TTTCTTTTTCTTTTTTTT		up	up	66.m04555	AN9096.1	AO070332000179					1	2	1	0	255	158	40	No EST	No EST
45	TTTCTTTTTCTTTTTTTT		up	down	58.m07216	AN9204.1	AO070338000019	Acetyltransferases, including N-acetylases of ribosomal proteins	J		0.203093	1	1	2	0	139	218	353			No EST	No EST
45	TTTCTTTTTCTTTTTTTT		up	down	52.m04075	AN9357.1	AO070315000043	Predicted dehydrogenase	Q		0.669353	1	1	1	0	192	122	25			No EST	No EST
45	TTTCTTTTTCTTTTTTTT		up	up	66.m04767	AN9099.1	AO070332000175	SPRY domain-containing proteins				1	1	1	0	211	98	77	No EST	No EST
45	TTTCTTTTTCTTTTTTTT		up	up	66.m04760	AN9108.1	AO070332000164	predicted protein [Neurospora crassa]				1	1	3	0	107	35	469	No EST	No EST
45	TTTCTTTTTCTTTTTTTT		up	up	66.m04608	AN9146.1	AO070332000116	hypothetical protein [Neurospora crassa]				1	1	3	0	462	41	51	No EST	No EST
45	TTTCTTTTTCTTTTTTTT		up	up	66.m04586	AN9149.1	AO070332000147	Ca2+-dependent lipid-binding protein CLB1/vesicle protein vp115/Granuphilin A, contains C2 domain				1	2	1	0	138	7	42	No EST	No EST
45	TTTCTTTTTCTTTTTTTT		up	up	52.m03906	AN9377.1	AO070315000006	Allergen Asp f 4				1	1	1	0	132	422	421	No EST	No EST
45	TTTCTTTTTCTTTTTTTT		up	up	71.m15215	AN9451.1	AO070219000021	predicted protein [Neurospora crassa]				2	1	2	0	114	88	131	127	1
233	TCTCCTTTCCTCyC		up	down	71.m16041	AN0047.1	AO070314000125	GTP-binding protein GP-1				1	1	1	0	63	133	138			272	1
233	TCTCCTTTCCTCyC		up	up	71.m15331	AN0051.1	AO070314000138	Isopenicillin N synthase and related dioxygenases				1	1	1	0	207	136	91	No EST	No EST
233	TCTCCTTTCCTCyC		up	up	71.m15444	AN0170.1	AO070321000076	Thioredoxin	O		0.837308	1	1	1	0	182	214	72	207	0
233	TCTCCTTTCCTCyC		up	up	54.m06529	AN0254.1	AO070334000106	C-3 sterol dehydrogenase/3-beta-hydroxysteroid dehydrogenase and related dehydrogenases	IE		4.28577529470617 0.745375778970292	1	1	2	0	303	147	247	No EST	No EST
233	TCTCCTTTCCTCyC		up	up	69.m15270	AN0575.1	AO070272000054	Calmodulin-binding protein CRAG, contains DENN domain	T		4.9998	2	5	2	0	429	49	72	117	1
233	TCTCCTTTCCTCyC		up	down	70.m15259	AN0655.1	AO070343000571	hypothetical protein [Neurospora crassa]				2	1	2	0	150	234	20			No EST	No EST
233	TCTCCTTTCCTCyC		up	down	70.m15286	AN0684.1	AO070343000534	Nucleolar GTPase/ATPase p130	Y		12.7154	1	1	1	0	163	155	149			61	0
233	TCTCCTTTCCTCyC		up	up	70.m15290	AN0687.1	AO070343000527	Spermidine synthase	E		0.745376	2	2	2	0	86	228	273	123	0
233	TCTCCTTTCCTCyC		up	up	70.m15335	AN0726.1	AO070343000481	beta-1,6-N-acetylglucosaminyltransferase, contains WSC domain	GO		5.05419317961222 0.837307665519789	1	1	2	0	185	155	73	170	1
233	TCTCCTTTCCTCyC		up	up	70.m15361	AN0747.1	AO070343000435	Mitochondrial processing peptidase, beta subunit, and related enzymes (insulinase superfamily)	O		0.837308	1	1	1	0	31	180	217	29	0
233	TCTCCTTTCCTCyC		up	down	70.m15793	AN0809.1	AO070239000006	RNA polymerase II, large subunit	K		1.01548	1	1	1	0	17	169	266			No EST	No EST
233	TCTCCTTTCCTCyC		up	up	70.m15460	AN0867.1	AO070320000018	hypothetical protein [Neurospora crassa]				1	1	1	0	90	164	436	No EST	No EST
233	TCTCCTTTCCTCyC		up	up	70.m15456	AN0870.1	AO070320000023	Mitochondrial phosphate carrier protein	C	1	0.00386474	2	3	1	0	55	349	314	15	0
233	TCTCCTTTCCTCyC		up	up	70.m15524	AN0917.1	AO070320000097	Transcriptional coactivator CAPER (RRM superfamily)	K		1.01548	1	1	2	0	51	352	117	168	0
233	TCTCCTTTCCTCyC		up	down	70.m15807	AN0924.1	AO070320000103	Uncharacterized conserved protein				2	1	3	0	47	168	77			No EST	No EST
233	TCTCCTTTCCTCyC		up	up	70.m15813	AN0937.1	AO070320000128	NITROGEN ASSIMILATION TRANSCRIPTION FACTOR NIT-4 [Neurospora crassa]				1	2	1	0	144	55	62	No EST	No EST
233	TCTCCTTTCCTCyC		up	down	70.m15600	AN0953.1	AO070320000154	Predicted small GTPase involved in nuclear protein import	U		5.62034	1	2	2	0	317	17	328			35	1
233	TCTCCTTTCCTCyC		up	up	70.m15626	AN0986.1	AO070318000155	PHD Zn-finger proteins				3	3	1	0	302	12	28	No EST	No EST
233	TCTCCTTTCCTCyC		up	up	70.m15221	AN1003.1	AO070312000031	Isocitrate dehydrogenase, alpha subunit	E		0.745376	1	1	1	0	65	186	207	48	0
233	TCTCCTTTCCTCyC		up	up	70.m15130	AN1102.1	AO070285000036	Serine palmitoyltransferase	O		0.837308	2	1	1	0	57	245	275	150	0
233	TCTCCTTTCCTCyC		up	down	70.m15114	AN1126.1	AO070331000119	GTP-binding ADP-ribosylation factor Arf1	U		5.62034	2	1	2	1	145	178	141			286	1
233	TCTCCTTTCCTCyC		up	up	70.m15059	AN1162.1	AO070331000152	Elongation factor 1 beta/delta chain	K		1.01548	1	1	1	0	49	124	144	17	0
233	TCTCCTTTCCTCyC		up	up	70.m15772	AN1165.1	AO070331000157	Predicted 3-ketosphinganine reductase	Q		6.04463	1	1	1	0	126	0	117	No EST	No EST
233	TCTCCTTTCCTCyC		up	up	70.m15040	AN1177.1	AO070331000173	Vesicle coat complex COPI, beta subunit	U		5.62034	1	1	1	0	38	103	48	No EST	No EST
233	TCTCCTTTCCTCyC		up	up	70.m15003	AN1222.1	AO070331000222	S-adenosylmethionine synthetase	H		8.46731	2	1	1	0	40	165	210	193	1
233	TCTCCTTTCCTCyC		up	up	70.m14923	AN1284.1	AO070332000035	Predicted GTP-binding protein (ODN superfamily)				5	1	3	0	5	292	196	No EST	No EST
233	TCTCCTTTCCTCyC		up	up	70.m14890	AN1343.1	AO070247000021	TFIIF-interacting CTD phosphatase, including NLI-interacting factor (involved in RNA polymerase II regulation)	K		1.01548	1	1	2	0	335	126	46	No EST	No EST
233	TCTCCTTTCCTCyC		up	up	70.m14845	AN1378.1	AO070243000008	predicted protein [Neurospora crassa]				3	2	1	1	147	163	241	189	1
233	TCTCCTTTCCTCyC		up	up	55.m02926	AN1429.1	AO070242000022	Choline dehydrogenase and related flavoproteins	E		0.745376	1	1	3	0	217	412	325	48	0
233	TCTCCTTTCCTCyC		up	up	55.m02925	AN1430.1	AO070242000021	NAD-dependent aldehyde dehydrogenases	C	1	0.00386474	1	1	2	0	215	451	69	No EST	No EST
233	TCTCCTTTCCTCyC		up	down	55.m03039	AN1520.1	AO070334000238	Nucleolar GTPase/ATPase p130	Y		12.7154	2	2	1	0	202	123	209			328	1
233	TCTCCTTTCCTCyC		up	up	55.m03042	AN1523.1	AO070334000241	F0F1-type ATP synthase, alpha subunit	C	1	0.00386474	1	2	1	0	90	311	332	68	0
233	TCTCCTTTCCTCyC		up	up	55.m03067	AN1547.1	AO070339000307	Acetyl-CoA hydrolase	C	1	0.00386474	3	1	4	0	64	433	34	No EST	No EST
233	TCTCCTTTCCTCyC		up	down	58.m07718	AN1639.1	AO070299000037	Thioredoxin-like protein	O		0.837308	1	2	1	1	358	385	350			No EST	No EST
233	TCTCCTTTCCTCyC		up	down	58.m07719	AN1652.1	AO070299000039	FOG: Zn-finger				1	1	2	0	387	318	196			No EST	No EST
233	TCTCCTTTCCTCyC		up	down	58.m07734	AN1669.1	AO070299000051	FOG: Immunoglobin and related proteins	P		4.65856	1	1	1	0	43	247	275			No EST	No EST
233	TCTCCTTTCCTCyC		up	up	58.m08869	AN1933.1	AO070342000200	Predicted membrane protein				2	2	2	0	42	307	431	391	1
233	TCTCCTTTCCTCyC		up	down	58.m07643	AN2055.1	AO070292000025	hypothetical protein [Neurospora crassa]				1	1	1	0	37	49	58			447	1
233	TCTCCTTTCCTCyC		up	up	58.m07644	AN2056.1	AO070292000026	Uncharacterized conserved protein				1	1	1	0	387	330	271	No EST	No EST
233	TCTCCTTTCCTCyC		up	up	57.m05760	AN2062.1	AO070341000205	Molecular chaperones GRP78/BiP/KAR2, HSP70 superfamily	O		0.837308	3	2	3	0	190	101	47	173	1
233	TCTCCTTTCCTCyC		up	up	57.m05769	AN2069.1	AO070341000218	Cytochrome b5	C	1	0.00386474	3	1	2	0	87	158	139	No EST	No EST
233	TCTCCTTTCCTCyC		up	down	57.m05777	AN2078.1	AO070341000231	Thyroid hormone receptor-associated protein complex, subunit TRAP240	K		1.01548	1	1	1	0	237	7	135			No EST	No EST
233	TCTCCTTTCCTCyC		up	up	72.m19708	AN2133.1	AO070278000026	Armadillo/beta-Catenin/plakoglobin	TZ		4.99979971356992 8.41157787507119	1	1	1	0	65	84	180	No EST	No EST
233	TCTCCTTTCCTCyC		up	up	72.m19699	AN2142.1	AO070343000188	Karyopherin (importin) alpha	U		5.62034	3	1	1	0	88	170	185	No EST	No EST
233	TCTCCTTTCCTCyC		up	down	72.m19677	AN2163.1	AO070343000222	Mitotic spindle checkpoint protein	D		8.01033	1	3	4	0	56	288	7			274	0
233	TCTCCTTTCCTCyC		up	up	69.m14881	AN2190.1	AO070247000014	Predicted methyltransferase				1	1	4	0	285	0	21	No EST	No EST
233	TCTCCTTTCCTCyC		up	down	71.m15855	AN2210.1	AO070294000012	Predicted transporter (ABC superfamily)				1	2	1	0	76	9	165			344	1
233	TCTCCTTTCCTCyC		up	up	71.m15889	AN2251.1	AO070326000115	Predicted membrane protein				1	1	2	0	207	274	179	No EST	No EST
233	TCTCCTTTCCTCyC		up	down	71.m15896	AN2256.1	AO070326000107	Helicase-like transcription factor HLTF/DNA helicase RAD5, DEAD-box superfamily	KL		1.01548329749935 4.34546556837552	1	1	1	0	144	34	182			No EST	No EST
233	TCTCCTTTCCTCyC		up	up	71.m15519	AN2315.1	AO070323000037	F0F1-type ATP synthase, beta subunit	C	1	0.00386474	2	1	2	1	59	312	309	104	0
233	TCTCCTTTCCTCyC		up	up	69.m15223	AN2435.1	AO070264000043	ATP-citrate lyase	C	1	0.00386474	2	1	1	0	176	267	352	187	0
233	TCTCCTTTCCTCyC		up	down	54.m06688	AN2743.1	AO070338000228	Translation initiation factor 3, subunit a (eIF-3a)	J		4.36953	1	1	1	0	169	58	68			No EST	No EST
233	TCTCCTTTCCTCyC		up	down	54.m06687	AN2744.1	AO070338000227	predicted protein [Neurospora crassa]				1	2	1	0	4	174	455			No EST	No EST
233	TCTCCTTTCCTCyC		up	up	59.m09263	AN2761.1	AO070327000023	Ubiquitin-protein ligase	O		0.837308	4	2	6	0	162	267	106	144	0
233	TCTCCTTTCCTCyC		up	up	59.m08698	AN2854.1	AO070338000167	Transcription factor of the Forkhead/HNF3 family	K		1.01548	1	2	1	0	278	20	41	No EST	No EST
233	TCTCCTTTCCTCyC		up	up	59.m08697	AN2855.1	AO070338000169	FOG: Zn-finger				3	2	2	0	90	202	106	180	0
233	TCTCCTTTCCTCyC		up	up	59.m08719	AN2871.1	AO070338000143	SWI-SNF chromatin-remodeling complex protein	B		10.0933	4	3	3	0	230	109	136	No EST	No EST
233	TCTCCTTTCCTCyC		up	up	59.m09023	AN2989.1	AO070337000133	FOG: RRM domain				2	1	3	0	89	391	10	183	0
233	TCTCCTTTCCTCyC		up	down	59.m08989	AN3031.1	AO070331000089	Pyridoxalphosphate-dependent enzyme/predicted threonine synthase	E		0.745376	1	1	1	0	20	87	57			No EST	No EST
233	TCTCCTTTCCTCyC		up	up	59.m08957	AN3058.1	AO070337000016	Glycine/serine hydroxymethyltransferase	E		0.745376	2	1	3	0	59	438	134	66	0
233	TCTCCTTTCCTCyC		up	up	59.m08644	AN3100.1	AO070334000141	predicted protein [Neurospora crassa]				3	2	1	1	415	320	299	106	0
233	TCTCCTTTCCTCyC		up	up	59.m09373	AN3113.1	AO070303000036	Glucose-6-phosphate/phosphate and phosphoenolpyruvate/phosphate antiporter	GE		5.05419317961222 0.745375778970292	1	1	2	0	103	276	174	No EST	No EST
233	TCTCCTTTCCTCyC		up	up	59.m08623	AN3114.1	AO070303000035	predicted protein [Neurospora crassa]				2	3	4	0	241	36	257	No EST	No EST
233	TCTCCTTTCCTCyC		up	down	59.m08623	AN3114.1	AO070303000035	predicted protein [Neurospora crassa]				2	1	1	0	227	237	246			No EST	No EST
233	TCTCCTTTCCTCyC		up	up	66.m04660	AN3359.1	AO070317000081	Amino acid transporters	E		0.745376	1	1	2	0	221	215	135	23	0
233	TCTCCTTTCCTCyC		up	up	66.m04646	AN3376.1	AO070281000020	Squalene synthetase	I		4.28578	3	5	1	0	11	40	76	298	1
233	TCTCCTTTCCTCyC		up	up	66.m04618	AN3416.1	AO070203000005	SNARE protein Syntaxin 1 and related proteins	U		5.62034	1	1	1	0	280	162	158	No EST	No EST
233	TCTCCTTTCCTCyC		up	up	69.m15402	AN3691.1	AO070341000316	AAA+-type ATPase	O		0.837308	1	1	2	0	125	357	382	No EST	No EST
233	TCTCCTTTCCTCyC		up	up	69.m15386	AN3729.1	AO070342000283	1,3-beta-glucan synthase/callose synthase catalytic subunit	M		10.6832	2	1	1	0	365	41	135	No EST	No EST
233	TCTCCTTTCCTCyC		up	up	69.m15382	AN3733.1	AO070342000279	Mannosyl-oligosaccharide alpha-1,2-mannosidase and related glycosyl hydrolases	G		5.05419	1	1	2	0	440	117	130	No EST	No EST
233	TCTCCTTTCCTCyC		up	down	65.m07367	AN3757.1	AO070309000049	Predicted alpha/beta hydrolase BEM46				1	1	1	0	212	5	283			No EST	No EST
233	TCTCCTTTCCTCyC		up	down	69.m14970	AN3955.1	AO070341000068	Uncharacterized conserved protein				2	1	1	0	165	160	199			209	1
233	TCTCCTTTCCTCyC		up	up	54.m06579	AN4015.1	AO070328000151	Translation initiation factor 5A (eIF-5A)	J		4.36953	1	1	2	0	87	117	187	70	0
233	TCTCCTTTCCTCyC		up	up	54.m06544	AN4026.1	AO070328000109					1	1	1	0	169	222	84	No EST	No EST
233	TCTCCTTTCCTCyC		up	down	54.m06728	AN4087.1	AO070342000080	40S ribosomal protein S3	J		4.36953	1	1	1	0	6	10	32			60	1
233	TCTCCTTTCCTCyC		up	up	54.m06745	AN4189.1	AO070342000110	Mitogen-activated protein kinase kinase (MAP2K)	T		4.9998	1	1	2	0	207	193	125	No EST	No EST
233	TCTCCTTTCCTCyC		up	up	54.m06754	AN4192.1	AO070342000112	Molecular chaperone (DnaJ superfamily)	O		0.837308	1	1	1	0	7	397	403	No EST	No EST
233	TCTCCTTTCCTCyC		up	up	54.m07041	AN4210.1	AO070231000014	Signaling protein SWIFT and related BRCT domain proteins	KTDL		1.01548329749935 4.99979971356992 8.01033033227436 4.34546556837552	1	1	1	0	172	216	293	No EST	No EST
233	TCTCCTTTCCTCyC		up	up	54.m06800	AN4218.1	AO070315000081	Translation elongation factor EF-1 alpha/Tu	J		4.36953	2	1	2	1	118	287	3	96	0
233	TCTCCTTTCCTCyC		up	down	54.m06803	AN4240.1	AO070324000174	Protein involved in glucose derepression and pre-vacuolar endosome protein sorting	U		5.62034	1	1	1	0	36	34	38			No EST	No EST
233	TCTCCTTTCCTCyC		up	up	58.m08000	AN4323.1	AO070230000015	Branched chain aminotransferase BCAT1, pyridoxal phosphate enzymes type IV superfamily	E		0.745376	1	1	1	0	87	27	121	270	1
233	TCTCCTTTCCTCyC		up	up	58.m07962	AN4361.1	AO070261000004	Transcriptional activator FOSB/c-Fos and related bZIP transcription factors	K		1.01548	1	2	3	0	241	210	155	263	1
233	TCTCCTTTCCTCyC		up	up	58.m08982	AN4411.1	AO070273000031	hypothetical protein ( (AL513462) related to Sts1 protein [Neurospora crassa] )				1	2	1	0	232	98	266	No EST	No EST
233	TCTCCTTTCCTCyC		up	up	57.m05648	AN4483.1	AO070311000032	Ca2+/calmodulin-dependent protein kinase, EF-Hand protein superfamily	T		4.9998	2	2	5	0	94	338	209	No EST	No EST
233	TCTCCTTTCCTCyC		up	up	57.m05978	AN4514.1	AO070311000070	Peptide methionine sulfoxide reductase	O		0.837308	1	1	2	0	28	307	39	174	0
233	TCTCCTTTCCTCyC		up	up	57.m05527	AN4603.1	AO070267000024	Dihydroorotase and related enzymes	F		7.26551	2	1	2	0	23	367	494	No EST	No EST
233	TCTCCTTTCCTCyC		up	up	71.m15670	AN4687.1	AO070284000042	3-Methylcrotonyl-CoA carboxylase, non-biotin containing subunit/Acetyl-CoA carboxylase carboxyl transferase, subunit beta	EI		0.745375778970292 4.28577529470617	1	1	1	0	164	2	110	135	1
233	TCTCCTTTCCTCyC		up	up	59.m08812	AN4908.1	AO070338000038	Uncharacterized protein CLU1/cluA/TIF31 involved in mitochondrial morphology/distribution, also found associated with eIF-3				2	1	1	0	132	140	118	No EST	No EST
233	TCTCCTTTCCTCyC		up	up	59.m09454	AN4997.1	AO070288000080	Phosphatidylinositol transfer protein SEC14 and related proteins	I		4.28578	1	1	4	0	227	288	17	No EST	No EST
233	TCTCCTTTCCTCyC		up	down	59.m09454	AN4997.1	AO070288000080	Phosphatidylinositol transfer protein SEC14 and related proteins	I		4.28578	1	2	1	0	2	112	17			No EST	No EST
233	TCTCCTTTCCTCyC		up	down	59.m08914	AN5011.1	AO070224000003	FGF receptor activating protein 1	T		4.9998	1	1	1	0	148	303	29			No EST	No EST
233	TCTCCTTTCCTCyC		up	up	59.m08680	AN5026.1	AO070338000185	PHD finger protein AF10				1	3	2	0	386	231	39	No EST	No EST
233	TCTCCTTTCCTCyC		up	up	54.m06902	AN5122.1	AO070291000057	Adenylate kinase	F		7.26551	3	1	1	0	80	200	222	No EST	No EST
233	TCTCCTTTCCTCyC		up	up	54.m06889	AN5134.1	AO070291000041	Glutamate synthase	E		0.745376	2	1	2	0	253	311	58	No EST	No EST
233	TCTCCTTTCCTCyC		up	down	69.m14917	AN5218.1	AO070337000261	Activating transcription factor 4	K		1.01548	1	1	1	0	19	51	51			No EST	No EST
233	TCTCCTTTCCTCyC		up	up	69.m15489	AN5445.1	AO070333000112					2	1	1	0	286	264	228	No EST	No EST
233	TCTCCTTTCCTCyC		up	up	69.m15483	AN5449.1	AO070239000028	Arylsulfatase A and related enzymes	P		4.65856	2	3	4	0	191	205	110	No EST	No EST
233	TCTCCTTTCCTCyC		up	up	58.m07334	AN5642.1	AO070342000232	predicted protein [Neurospora crassa]				1	2	1	0	192	90	182	No EST	No EST
233	TCTCCTTTCCTCyC		up	up	54.m06840	AN5719.1	AO070324000131	60s acidic ribosomal protein P1	J		4.36953	2	1	1	0	44	195	129	101	0
233	TCTCCTTTCCTCyC		up	down	54.m06840	AN5719.1	AO070324000131	60s acidic ribosomal protein P1	J		4.36953	2	3	2	1	25	64	27			438	1
233	TCTCCTTTCCTCyC		up	up	69.m14857	AN5740.1	AO070341000019	Ras-related small GTPase, Rho type				1	2	2	0	503	35	276	83	1
233	TCTCCTTTCCTCyC		up	down	69.m15631	AN5745.1	AO070341000002	Translation initiation factor eIF3, p35 subunit	J		4.36953	1	1	1	1	84	83	81			221	1
233	TCTCCTTTCCTCyC		up	up	69.m14848	AN5750.1	AO070341000007	predicted protein [Neurospora crassa]				2	1	1	0	252	169	299	No EST	No EST
233	TCTCCTTTCCTCyC		up	down	72.m18953	AN5822.1	AO070260000020	Cyclin-dependent kinase WEE1	D		8.01033	1	1	2	0	414	406	146			No EST	No EST
233	TCTCCTTTCCTCyC		up	up	72.m19237	AN5893.1	AO070245000013	G protein signaling regulators	T		4.9998	2	2	1	0	16	34	33	No EST	No EST
233	TCTCCTTTCCTCyC		up	up	72.m19202	AN5929.1	AO070340000354	Calcium-responsive transcription coactivator	K		1.01548	2	2	1	0	136	335	197	No EST	No EST
233	TCTCCTTTCCTCyC		up	up	72.m19952	AN5931.1	AO070340000344	ATP-dependent RNA helicase	A		2.36281	2	2	1	0	126	61	65	111	1
233	TCTCCTTTCCTCyC		up	up	72.m19141	AN5999.1	AO070340000277	Multifunctional pyrimidine synthesis protein CAD (includes carbamoyl-phophate synthetase, aspartate transcarbamylase, and glutamine amidotransferase)				2	1	2	0	212	300	255	No EST	No EST
233	TCTCCTTTCCTCyC		up	up	72.m19080	AN6089.1	AO070340000143	Mitochondrial chaperonin, Cpn60/Hsp60p	O		0.837308	1	2	2	0	103	212	161	140	0
233	TCTCCTTTCCTCyC		up	up	72.m19295	AN6195.1	AO070308000098	FOG: Zn-finger				2	2	2	0	448	43	4	386	1
233	TCTCCTTTCCTCyC		up	down	72.m19980	AN6247.1	AO070304000102	predicted protein [Neurospora crassa]				2	4	1	0	77	18	65			No EST	No EST
233	TCTCCTTTCCTCyC		up	up	72.m18968	AN6299.1	AO070260000007	Uncharacterized conserved protein				1	1	1	0	531	231	160	No EST	No EST
233	TCTCCTTTCCTCyC		up	up	72.m19507	AN6348.1	AO070275000017	Mitochondrial import inner membrane translocase, subunit TIM23	U		5.62034	1	1	1	0	33	119	106	No EST	No EST
233	TCTCCTTTCCTCyC		up	up	62.m03095	AN6508.1	AO070270000001	Glycogen synthase kinase-3	G		5.05419	1	2	1	0	410	35	147	36	1
233	TCTCCTTTCCTCyC		up	up	62.m03114	AN6525.1	AO070270000024	Glyoxylate/hydroxypyruvate reductase (D-isomer-specific 2-hydroxy acid dehydrogenase superfamily)	C	1	0.00386474	2	1	1	0	230	62	397	No EST	No EST
233	TCTCCTTTCCTCyC		up	up	62.m03135	AN6538.1	AO070270000046	LRR-containing protein				1	1	2	0	329	179	129	No EST	No EST
233	TCTCCTTTCCTCyC		up	up	62.m03196	AN6601.1	AO070326000052	Transmembrane protein				1	1	1	0	60	129	118	No EST	No EST
233	TCTCCTTTCCTCyC		up	up	62.m03250	AN6650.1	AO070269000001	Citrate synthase	C	1	0.00386474	1	2	2	0	42	150	335	No EST	No EST
233	TCTCCTTTCCTCyC		up	up	62.m03302	AN6669.1	AO070321000010	Predicted transporter (major facilitator superfamily)				2	1	1	0	98	469	453	No EST	No EST
233	TCTCCTTTCCTCyC		up	up	65.m07257	AN6717.1	AO070339000157	NAD-dependent malate dehydrogenase	C	1	0.00386474	2	1	3	0	64	168	159	No EST	No EST
233	TCTCCTTTCCTCyC		up	up	65.m07239	AN6731.1	AO070339000175	Fatty acid desaturase	I		4.28578	2	2	2	0	161	97	396	7	0
233	TCTCCTTTCCTCyC		up	up	71.m15271	AN6858.1	AO070314000075	predicted protein [Neurospora crassa]				1	2	1	0	222	195	293	No EST	No EST
233	TCTCCTTTCCTCyC		up	down	71.m15255	AN6880.1	AO070314000044	Inositol polyphosphate multikinase, component of the ARGR transcription regulatory complex	KIT		1.01548329749935 4.28577529470617 4.99979971356992	1	1	2	0	234	122	92			No EST	No EST
233	TCTCCTTTCCTCyC		up	up	72.m19589	AN7570.1	AO070343000416	Alpha tubulin	Z		8.41158	1	1	3	0	124	393	190	No EST	No EST
233	TCTCCTTTCCTCyC		up	down	72.m19601	AN7580.1	AO070343000328	predicted protein [Neurospora crassa]				1	1	1	0	22	12	167			No EST	No EST
233	TCTCCTTTCCTCyC		up	up	57.m05936	AN7660.1	AO070268000029	Bifunctional GTP cyclohydrolase II/3,4-dihydroxy-2butanone-4-phosphate synthase	H		8.46731	2	1	2	0	31	195	275	No EST	No EST
233	TCTCCTTTCCTCyC		up	down	71.m15720	AN7698.1	AO070325000103	Myosin class I heavy chain	Z		8.41158	1	1	1	0	226	240	26			311	1
233	TCTCCTTTCCTCyC		up	up	71.m15734	AN7710.1	AO070325000117	Predicted phosphatase/phosphohexomutase				1	1	1	0	97	300	364	184	0
233	TCTCCTTTCCTCyC		up	up	71.m15748	AN7721.1	AO070325000136	Transport protein Sec61, alpha subunit	UO		5.62034359867491 0.837307665519789	2	1	2	0	41	177	119	106	0
233	TCTCCTTTCCTCyC		up	down	71.m15776	AN7750.1	AO070325000175	Protein predicted to be involved in carbohydrate metabolism	G		5.05419	1	2	1	0	12	215	160			No EST	No EST
233	TCTCCTTTCCTCyC		up	up	53.m03857	AN8010.1	AO070322000057	Glycogen synthase	G		5.05419	2	2	2	0	204	82	106	293	1
233	TCTCCTTTCCTCyC		up	up	53.m03827	AN8117.1	AO070322000025	Fatty acyl-CoA elongase/Polyunsaturated fatty acid specific elongation enzyme	I		4.28578	1	2	4	0	213	219	303	No EST	No EST
233	TCTCCTTTCCTCyC		up	down	53.m03827	AN8117.1	AO070322000025	Fatty acyl-CoA elongase/Polyunsaturated fatty acid specific elongation enzyme	I		4.28578	1	1	1	0	435	367	472			499	1
233	TCTCCTTTCCTCyC		up	up	53.m04128	AN8235.1	AO070310000073	predicted protein [Neurospora crassa]				1	2	1	0	206	217	139	No EST	No EST
233	TCTCCTTTCCTCyC		up	up	53.m03692	AN8269.1	AO070310000033	Molecular chaperone (HSP90 family)	O		0.837308	3	1	2	0	225	159	179	336	1
233	TCTCCTTTCCTCyC		up	up	53.m03686	AN8274.1	AO070310000027	Mitochondrial tricarboxylate/dicarboxylate carrier proteins	C	1	0.00386474	2	1	1	1	234	307	264	158	0
233	TCTCCTTTCCTCyC		up	up	53.m03685	AN8275.1	AO070310000026	Citrate synthase	C	1	0.00386474	1	1	1	0	72	79	133	73	0
233	TCTCCTTTCCTCyC		up	up	62.m03394	AN8676.1	AO070315000096	Regulator of arginine metabolism and related MADS box-containing transcription factors	K		1.01548	1	1	2	1	180	138	432	157	1
233	TCTCCTTTCCTCyC		up	up	62.m03393	AN8677.1	AO070315000097	Galactosyltransferases	G		5.05419	2	2	2	0	505	33	11	No EST	No EST
233	TCTCCTTTCCTCyC		up	up	71.m15961	AN8830.1	AO070271000049	Checkpoint kinase and related serine/threonine protein kinases	D		8.01033	1	1	2	0	157	65	12	121	1
233	TCTCCTTTCCTCyC		up	up	56.m02292	AN8881.1	AO070293000011	Mitochondrial carnitine-acylcarnitine carrier protein	C	1	0.00386474	1	1	1	0	61	261	238	334	1
233	TCTCCTTTCCTCyC		up	up	56.m03091	AN8945.1	AO070319000047	methyltransferase [Gibberella zeae]				1	1	1	0	43	350	387	125	0
233	TCTCCTTTCCTCyC		up	up	66.m04571	AN9112.1	AO070332000162	Alcohol dehydrogenase, class V	Q		6.04463	1	1	1	1	117	41	40	No EST	No EST
233	TCTCCTTTCCTCyC		up	up	53.m04180	AN9411.1	AO070310000008	NADH-ubiquinone oxidoreductase, NDUFS1/75 kDa subunit	C	1	0.00386474	1	1	4	0	29	107	102	No EST	No EST
234	GTTTGTCnTGTTTG		up	up	71.m15415	AN0131.1	AO070321000122	hypothetical protein [Neurospora crassa]				2	1	1	1	113	2	2	No EST	No EST
234	GTTTGTCnTGTTTG		up	up	71.m16051	AN0161.1	AO070321000086	mRNA cleavage and polyadenylation factor IA/II complex, subunit CLP1	A	1	0.00375518	1	1	1	0	141	59	204	No EST	No EST
234	GTTTGTCnTGTTTG		up	up	71.m15442	AN0167.1	AO070321000079	Translation initiation factor 2B, alpha subunit (eIF-2Balpha/GCN3)	J		2.3304	1	0	0	0	135	0	0	68	1
234	GTTTGTCnTGTTTG		up	down	54.m06638	AN0446.1	AO070338000308	Uncharacterized protein PSP1 (suppressor of DNA polymerase alpha mutations in yeast)				1	1	1	0	370	20	558			No EST	No EST
234	GTTTGTCnTGTTTG		up	up	69.m15266	AN0582.1	AO070280000004	Single-stranded DNA-binding replication protein A (RPA), medium (30 kD) subunit	L		5.41587	2	1	1	1	5	101	142	No EST	No EST
234	GTTTGTCnTGTTTG		up	up	70.m15453	AN0854.1	AO070320000001	Splicing coactivator SRm160/300, subunit SRm300	A	1	0.00375518	1	1	2	0	303	422	40	355	0
234	GTTTGTCnTGTTTG		up	down	70.m15808	AN0926.1	AO070320000110	Nuclear transport receptor Karyopherin-beta2/Transportin (importin beta superfamily)	YU		6.00093143789754 5.94832756554461	2	1	1	0	172	126	23			No EST	No EST
234	GTTTGTCnTGTTTG		up	up	70.m15042	AN1175.1	AO070331000170	Nucleolar protein NOP52/RRP1	A	1	0.00375518	1	1	2	0	150	80	76	No EST	No EST
234	GTTTGTCnTGTTTG		up	up	70.m14972	AN1249.1	AO070223000012	Spliceosomal protein FBP11/Splicing factor PRP40	A	1	0.00375518	1	1	1	1	126	26	27	No EST	No EST
234	GTTTGTCnTGTTTG		up	up	70.m14858	AN1371.1	AO070215000010	predicted protein [Neurospora crassa]				1	2	1	0	166	7	268	No EST	No EST
234	GTTTGTCnTGTTTG		up	up	69.m15042	AN1728.1	AO070324000059	NADH-ubiquinone oxidoreductase, NDUFS3/30 kDa subunit	C		6.38937	1	1	1	0	166	88	80	40	0
234	GTTTGTCnTGTTTG		up	up	58.m07660	AN1851.1	AO070292000043	Chaperonin complex component, TCP-1 theta subunit (CCT8)	O		0.467704	1	1	1	0	135	17	21	No EST	No EST
234	GTTTGTCnTGTTTG		up	up	58.m07634	AN2046.1	AO070292000013					1	2	1	0	264	137	130	No EST	No EST
234	GTTTGTCnTGTTTG		up	up	57.m05779	AN2080.1	AO070341000233	Polypeptide release factor 3	J		2.3304	1	1	2	0	176	242	20	55	0
234	GTTTGTCnTGTTTG		up	up	72.m19703	AN2137.1	AO070343000182	Cyclin B and related kinase-activating proteins	D		4.63454	2	2	1	0	272	200	6	No EST	No EST
234	GTTTGTCnTGTTTG		up	up	72.m19688	AN2153.1	AO070343000202	Exosomal 3'-5' exoribonuclease complex, subunit Rrp41 and related exoribonucleases	J		2.3304	2	1	1	1	166	338	364	No EST	No EST
234	GTTTGTCnTGTTTG		up	down	71.m15855	AN2210.1	AO070294000012	Predicted transporter (ABC superfamily)				1	1	1	0	86	172	204			344	1
234	GTTTGTCnTGTTTG		up	up	71.m15831	AN2234.1	AO070326000145	predicted protein [Neurospora crassa]				0	1	0	1	116	27	0	No EST	No EST
234	GTTTGTCnTGTTTG		up	up	71.m15902	AN2261.1	AO070326000103	Phosphatidylglycerolphosphate synthase	I		6.39172	1	1	1	1	9	47	56	47	0
234	GTTTGTCnTGTTTG		up	up	59.m08499	AN2490.1	AO070312000130	Uncharacterized conserved protein, contains N-recognin-type Zn-finger				2	1	1	1	132	99	213	No EST	No EST
234	GTTTGTCnTGTTTG		up	up	59.m09034	AN2980.1	AO070337000142	60S ribosomal protein L35A/L37	J		2.3304	1	2	2	1	33	371	425	81	0
234	GTTTGTCnTGTTTG		up	up	59.m08916	AN3082.1	AO070224000004	mRNA cleavage and polyadenylation factor II complex, subunit CFT2 (CPSF subunit)	A	1	0.00375518	2	1	1	0	243	124	207	No EST	No EST
234	GTTTGTCnTGTTTG		up	down	59.m08584	AN3142.1	AO070303000002	Nucleolar GTPase/ATPase p130	Y		6.00093	1	1	3	0	308	207	228			297	1
234	GTTTGTCnTGTTTG		up	up	59.m08516	AN3147.1	AO070256000043	Glycolipid transfer protein	G		5.13078	1	2	1	0	192	16	26	70	1
234	GTTTGTCnTGTTTG		up	up	58.m07385	AN3586.1	AO070342000163	Monooxygenase involved in coenzyme Q (ubiquinone) biosynthesis	HC		3.15808680457693 6.38936712971506	1	1	1	0	89	408	340	No EST	No EST
234	GTTTGTCnTGTTTG		up	up	58.m07441	AN3659.1	AO070342000029	Adaptor protein Enigma and related PDZ-LIM proteins	TZ		6.25460287399896 4.12027664947604	1	1	1	0	411	34	36	No EST	No EST
234	GTTTGTCnTGTTTG		up	down	58.m07982	AN4342.1	AO070240000017	Tryptophan-rich basic nuclear protein				3	1	2	0	73	262	422			No EST	No EST
234	GTTTGTCnTGTTTG		up	down	58.m07958	AN4369.1	AO070261000009	Ras1 guanine nucleotide exchange factor	T		6.2546	1	1	1	0	426	320	269			No EST	No EST
234	GTTTGTCnTGTTTG		up	down	58.m07878	AN4447.1	AO070273000006	Signal transduction histidine kinase	T		6.2546	1	1	1	0	58	110	222			101	0
234	GTTTGTCnTGTTTG		up	up	58.m07866	AN4458.1	AO070305000135	Spindle pole body protein - Sad1p	Z		4.12028	1	1	1	1	106	69	67	No EST	No EST
234	GTTTGTCnTGTTTG		up	up	58.m07864	AN4460.1	AO070305000133	WD40-repeat-containing subunit of the 18S rRNA processing complex	A	1	0.00375518	1	1	1	1	155	249	219	No EST	No EST
234	GTTTGTCnTGTTTG		up	down	59.m09218	AN4767.1	AO070327000046	Scaffold/matrix specific factor hnRNP-U/SAF-A, contains SPRY domain	A	1	0.00375518	1	1	1	0	8	34	64			274	1
234	GTTTGTCnTGTTTG		up	up	59.m09211	AN4771.1	AO070329000081	WD40 repeat protein				2	1	1	1	76	311	330	No EST	No EST
234	GTTTGTCnTGTTTG		up	up	59.m08812	AN4908.1	AO070338000038	Uncharacterized protein CLU1/cluA/TIF31 involved in mitochondrial morphology/distribution, also found associated with eIF-3				1	1	1	0	208	17	13	No EST	No EST
234	GTTTGTCnTGTTTG		up	down	59.m08873	AN4969.1	AO070288000035	Centromere-associated protein HEC1	D		4.63454	1	1	2	0	182	430	28			No EST	No EST
234	GTTTGTCnTGTTTG		up	down	54.m06911	AN5111.1	AO070291000068	E3 ubiquitin ligase interacting with arginine methyltransferase	O		0.467704	1	1	1	0	347	95	20			465	1
234	GTTTGTCnTGTTTG		up	up	69.m15498	AN5438.1	AO070333000100	Hsp90 co-chaperone CNS1 (contains TPR repeats)	O		0.467704	1	1	1	1	79	146	154	54	0
234	GTTTGTCnTGTTTG		up	up	69.m15743	AN5452.1	AO070239000031	Splicing factor 3b, subunit 3	A	1	0.00375518	2	1	1	0	42	87	56	179	1
234	GTTTGTCnTGTTTG		up	up	69.m15436	AN5522.1	AO070341000367	predicted protein [Neurospora crassa]				1	1	1	0	257	4	58	No EST	No EST
234	GTTTGTCnTGTTTG		up	up	69.m15615	AN5744.1	AO070341000001	Multifunctional chaperone (14-3-3 family)	O		0.467704	1	1	2	0	260	252	255	141	0
234	GTTTGTCnTGTTTG		up	up	69.m14811	AN5786.1	AO070249000032	hypothetical protein [Neurospora crassa]				1	1	1	0	52	53	33	No EST	No EST
234	GTTTGTCnTGTTTG		up	up	72.m19228	AN5902.1	AO070248000040	Alpha-1,2 glucosyltransferase/transcriptional activator	OKIT		0.467704388108704 3.69049295931665 6.39171980243256 6.25460287399896	1	1	1	0	121	18	24	No EST	No EST
234	GTTTGTCnTGTTTG		up	up	72.m19002	AN6171.1	AO070340000034	U3 small nucleolar ribonucleoprotein (snoRNP) component	A	1	0.00375518	1	2	2	0	149	59	223	41	0
234	GTTTGTCnTGTTTG		up	up	72.m18993	AN6176.1	AO070340000023	predicted protein [Neurospora crassa]				2	2	1	0	279	141	70	No EST	No EST
234	GTTTGTCnTGTTTG		up	up	62.m03131	AN6543.1	AO070270000041	Armadillo/beta-catenin-like repeat-containing protein	O		0.467704	1	1	3	0	321	235	186	139	0
234	GTTTGTCnTGTTTG		up	up	62.m03124	AN6549.1	AO070270000036	RNA polymerase II transcriptional regulation mediator	K		3.69049	1	1	1	1	156	71	87	No EST	No EST
234	GTTTGTCnTGTTTG		up	up	65.m07278	AN6707.1	AO070339000137	DNA or RNA helicases of superfamily II	KL		3.69049295931665 5.41587108820351	1	1	1	0	78	67	69	No EST	No EST
234	GTTTGTCnTGTTTG		up	up	71.m16029	AN6921.1	AO070313000060	HSP90 co-chaperone p23	O		0.467704	1	1	1	0	225	64	80	71	1
234	GTTTGTCnTGTTTG		up	up	57.m05449	AN7673.1	AO070325000053	Putative zinc transporter	P		8.33293	2	1	1	1	29	40	41	26	0
234	GTTTGTCnTGTTTG		up	up	57.m05454	AN7677.1	AO070325000067	hypothetical protein [Neurospora crassa]				1	1	2	0	288	70	79	82	1
234	GTTTGTCnTGTTTG		up	up	53.m03887	AN8056.1	AO070322000144	Chromosome condensation complex Condensin, subunit G	BD		8.04834301133854 4.6345362347303	1	1	1	1	206	73	88	161	1
234	GTTTGTCnTGTTTG		up	up	53.m03779	AN8194.1	AO070310000126	emp24/gp25L/p24 family of membrane trafficking proteins	U		5.94833	1	1	2	0	142	162	150	No EST	No EST
234	GTTTGTCnTGTTTG		up	up	53.m03758	AN8215.1	AO070310000097	5,10-methylenetetrahydrofolate reductase	E		5.2641	1	1	1	0	346	25	134	No EST	No EST
234	GTTTGTCnTGTTTG		up	up	62.m03475	AN8670.1	AO070315000087	Nucleolar GTPase/ATPase p130	Y		6.00093	1	1	1	0	291	177	173	No EST	No EST
234	GTTTGTCnTGTTTG		up	up	62.m03370	AN8699.1	AO070315000126	Ubiquitin-specific protease	O		0.467704	1	1	1	1	137	33	46	46	1
234	GTTTGTCnTGTTTG		up	down	62.m03358	AN8710.1	AO070315000137	FOG: Low-complexity				1	1	1	0	83	163	30			No EST	No EST
234	GTTTGTCnTGTTTG		up	up	66.m04582	AN9116.1	AO070332000151	Nicotinic acid phosphoribosyltransferase	H		3.15809	1	1	1	0	187	154	150	No EST	No EST
252	ACGCGTAAAGTGGTT		up	up	71.m15403	AN0122.1	AO070311000090	ATP-dependent Lon protease, bacterial type	O		2.24673	1	1	1	0	93	293	296	78	0
252	ACGCGTAAAGTGGTT		up	up	71.m15484	AN0228.1	AO070323000081	DNA replication licensing factor, MCM6 component	L		0.0227576	1	1	1	1	248	198	206	No EST	No EST
252	ACGCGTAAAGTGGTT		up	up	58.m08995	AN1660.1	AO070299000020	FOG: Immunoglobin and related proteins	P		1.45465	1	1	1	0	263	85	107	No EST	No EST
252	ACGCGTAAAGTGGTT		up	up	69.m15675	AN2460.1	AO070264000013	Splicing coactivator SRm160/300, subunit SRm300	A		0.353084	2	1	1	0	196	297	356	No EST	No EST
252	ACGCGTAAAGTGGTT		up	up	59.m08977	AN3040.1	AO070337000054	Projectin/twitchin and related proteins	Z		0.139259	1	1	1	0	125	107	227	No EST	No EST
252	ACGCGTAAAGTGGTT		up	up	58.m07862	AN4472.1	AO070305000131	Putative transcription factor HALR/MLL3, involved in embryonic development				1	1	1	0	23	319	253	No EST	No EST
252	ACGCGTAAAGTGGTT		up	up	57.m05851	AN7493.1	AO070287000024	predicted protein [Neurospora crassa]				1	1	1	0	170	41	33	145	1
252	ACGCGTAAAGTGGTT		up	up	53.m03853	AN7994.1	AO070322000052	DNA replication licensing factor, MCM5 component	L		0.0227576	1	1	1	1	133	117	125	No EST	No EST
252	ACGCGTAAAGTGGTT		up	up	53.m03916	AN8065.1	AO070330000021	Actin-related protein Arp2/3 complex, subunit ARPC3	Z		0.139259	1	1	1	1	80	26	26	No EST	No EST
252	ACGCGTAAAGTGGTT		up	up	53.m04127	AN8236.1	AO070310000072	Putative growth response protein	T		2.04948	1	1	1	0	134	187	37	No EST	No EST
252	ACGCGTAAAGTGGTT		up	up	62.m03399	AN8671.1	AO070315000088	tRNA-splicing endonuclease positive effector (SEN1)	A		0.353084	1	1	2	0	471	11	8	No EST	No EST
252	ACGCGTAAAGTGGTT		up	up	62.m03468	AN8713.1	AO070315000139	Structure-specific endonuclease ERCC1-XPF, catalytic component XPF/ERCC4	L		0.0227576	1	1	1	0	4	181	140	4	0
328	GCATAGCATGGCGT		down	down	70.m15351	AN0716.1	AO070343000451	Uncharacterized conserved protein				1	1	1	0	74	43	72			No EST	No EST
328	GCATAGCATGGCGT		down	up	70.m14935	AN1272.1	AO070332000020	Casein kinase II, beta subunit	TDK		5.40517892753173 2.17370458663162 6.24291775748114	1	1	1	0	290	23	23	No EST	No EST
328	GCATAGCATGGCGT		down	down	70.m14899	AN1335.1	AO070303000097	G-protein beta subunit-like protein (contains WD40 repeats)				1	1	1	1	106	63	59			No EST	No EST
328	GCATAGCATGGCGT		down	down	69.m14936	AN1918.1	AO070341000122	Phosphoenolpyruvate carboxykinase (ATP)	C		3.16912	1	1	1	1	38	78	59			195	1
328	GCATAGCATGGCGT		down	down	59.m08521	AN3144.1	AO070256000047	FYVE finger-containing protein				1	2	1	1	112	67	126			257	1
328	GCATAGCATGGCGT		down	up	59.m08819	AN4916.1	AO070338000027	40S ribosomal protein S7	J		3.29482	1	1	1	0	158	49	205	82	1
328	GCATAGCATGGCGT		down	down	69.m15562	AN5344.1	AO070333000180	Ubiquitin-protein ligase	O		3.74455	1	1	1	1	193	73	197			173	1
328	GCATAGCATGGCGT		down	down	65.m07417	AN5693.1	AO070309000108	Uncharacterized conserved protein				1	1	1	1	211	75	186			319	1
328	GCATAGCATGGCGT		down	down	72.m19257	AN5875.1	AO070308000144	rRNA processing protein	JD		3.29482238215225 2.17370458663162	1	1	1	1	101	103	105			173	1
328	GCATAGCATGGCGT		down	down	65.m07490	AN6696.1	AO070339000127	hypothetical protein [Neurospora crassa]				1	1	1	1	128	111	121			No EST	No EST
328	GCATAGCATGGCGT		down	down	71.m15293	AN6823.1	AO070314000102	hypothetical protein ( (AL513443) hypothetical protein [Neurospora crassa] )				1	3	2	1	58	12	47			No EST	No EST
328	GCATAGCATGGCGT		down	up	72.m20022	AN7304.1	AO070297000051	Mitochondrial solute carrier protein	C		3.16912	1	1	1	0	374	196	88	No EST	No EST
328	GCATAGCATGGCGT		down	down	57.m05871	AN7473.1	AO070287000053	mRNA capping enzyme, guanylyltransferase (alpha) subunit	A		2.88499	1	1	1	0	104	32	64			No EST	No EST
328	GCATAGCATGGCGT		down	down	53.m03757	AN8216.1	AO070310000096	Nucleoside diphosphate kinase	F		1.26509	1	2	1	1	281	230	286			113	0
328	GCATAGCATGGCGT		down	down	52.m04075	AN9357.1	AO070315000043	Predicted dehydrogenase	Q		2.64912	1	1	1	1	154	90	110			No EST	No EST
336	GGCGTTTGGG		down	down	54.m06624	AN0433.1	AO070338000284	60S ribosomal protein L18A	J		4.51915	1	1	1	1	338	86	13			No EST	No EST
336	GGCGTTTGGG		down	down	54.m06621	AN0436.1	AO070338000281	Predicted E3 ubiquitin ligase	O		1.23568	1	1	1	0	128	79	130			No EST	No EST
336	GGCGTTTGGG		down	down	70.m15630	AN0989.1	AO070318000148	SWI-SNF chromatin-remodeling complex protein	B		3.8289	1	1	1	1	107	108	126			No EST	No EST
336	GGCGTTTGGG		down	down	70.m15197	AN1039.1	AO070336000074	HLH transcription factor EBF/Olf-1 and related DNA binding proteins	K	1	0.00154964	1	1	1	0	5	48	194			No EST	No EST
336	GGCGTTTGGG		down	down	70.m15119	AN1116.1	AO070331000108	Transcription regulator XNP/ATRX, DEAD-box superfamily	K	1	0.00154964	1	1	1	1	132	122	115			50	0
336	GGCGTTTGGG		down	down	70.m14969	AN1255.1	AO070223000014	Chromodomain-helicase DNA-binding protein	K	1	0.00154964	1	2	1	0	141	100	122			No EST	No EST
336	GGCGTTTGGG		down	down	58.m07780	AN1713.1	AO070305000029	Predicted esterase of the alpha-beta hydrolase superfamily				1	1	1	0	144	145	174			No EST	No EST
336	GGCGTTTGGG		down	down	58.m07647	AN1855.1	AO070292000031	hypothetical protein [Neurospora crassa]				1	1	1	0	82	126	160			No EST	No EST
336	GGCGTTTGGG		down	down	58.m08944	AN2000.1	AO070301000095	Ubiquitin and ubiquitin-like proteins	O		1.23568	1	1	1	0	19	60	54			184	1
336	GGCGTTTGGG		down	down	72.m19657	AN2181.1	AO070343000260	Transcription initiation factor IIA, gamma subunit	K	1	0.00154964	3	1	1	0	24	104	140			No EST	No EST
336	GGCGTTTGGG		down	down	71.m15825	AN2238.1	AO070326000135	Molecular chaperone (DnaJ superfamily)	O		1.23568	1	1	1	0	31	87	45			231	1
336	GGCGTTTGGG		down	down	54.m06686	AN2745.1	AO070338000226	Acetyltransferase, (GNAT) family				1	1	1	1	64	42	70			No EST	No EST
336	GGCGTTTGGG		down	down	59.m08753	AN2902.1	AO070338000104	TFIIF-interacting CTD phosphatases, including NLI-interacting factor	K	1	0.00154964	1	1	1	0	118	11	205			295	1
336	GGCGTTTGGG		down	down	59.m08521	AN3144.1	AO070256000047	FYVE finger-containing protein				2	2	2	1	98	76	103			257	1
336	GGCGTTTGGG		down	down	59.m08579	AN3178.1	AO070256000001	Component of histone deacetylase complex (breast carcinoma metastasis suppressor 1 protein in human)	DK	1	1.6755847560646 0.00154964124728046	2	2	1	0	94	91	90			No EST	No EST
336	GGCGTTTGGG		down	down	58.m07808	AN3830.1	AO070305000068	Threonine/serine dehydratases	E		4.33439	1	1	1	0	117	59	82			218	1
336	GGCGTTTGGG		down	up	54.m07041	AN4210.1	AO070231000014	Signaling protein SWIFT and related BRCT domain proteins	KTDL	1	0.00154964124728046 2.64516856168208 1.6755847560646 5.32683350592104	1	2	1	1	394	167	147	No EST	No EST
336	GGCGTTTGGG		down	down	59.m08858	AN4953.1	AO070288000006	Ras-related small GTPase, Rho type				1	1	1	0	132	189	217			431	1
336	GGCGTTTGGG		down	down	69.m15442	AN5517.1	AO070341000376	Cdc4 and related F-box and WD-40 proteins				1	1	1	0	247	250	210			No EST	No EST
336	GGCGTTTGGG		down	down	54.m06817	AN5702.1	AO070324000158	Uncharacterized conserved protein				1	1	1	0	101	146	139			No EST	No EST
336	GGCGTTTGGG		down	down	72.m19269	AN5865.1	AO070308000129	GTP-binding protein CRFG/NOG1 (ODN superfamily)				1	1	1	0	109	160	99			163	1
336	GGCGTTTGGG		down	down	72.m19252	AN5879.1	AO070245000029	Uncharacterized conserved protein, contains ML domain				2	1	1	0	3	190	173			388	1
336	GGCGTTTGGG		down	up	72.m19170	AN5954.1	AO070340000308	RNA polymerase I-associated factor - PAF67	JK	1	4.51914823078007 0.00154964124728046	2	1	1	1	96	391	449	No EST	No EST
336	GGCGTTTGGG		down	up	72.m19188	AN5972.1	AO070340000330	Vesicle coat complex COPI, beta' subunit	U		1.48429	1	1	1	1	28	64	287	370	1
336	GGCGTTTGGG		down	down	72.m19518	AN6340.1	AO070298000007	Kinesin (KAR3 subfamily)	Z		4.48635	1	1	1	0	71	87	47			348	1
336	GGCGTTTGGG		down	down	72.m19646	AN7601.1	AO070343000271	hypothetical protein [Neurospora crassa]				2	1	2	1	364	261	476			No EST	No EST
336	GGCGTTTGGG		down	down	71.m15822	AN7628.1	AO070294000038	mRNA deadenylase subunit	A		2.70465	1	1	1	0	428	93	417			414	1
336	GGCGTTTGGG		down	down	57.m05947	AN7681.1	AO070325000071	Mod5 protein sorting/negative effector of RNA Pol III synthesis	K	1	0.00154964	1	1	1	0	140	168	159			No EST	No EST
336	GGCGTTTGGG		down	down	57.m05465	AN7688.1	AO070325000082	Protein similar to predicted member of the intramitochondrial sorting protein family	U		1.48429	1	1	1	0	65	59	61			No EST	No EST
336	GGCGTTTGGG		down	down	53.m03844	AN8002.1	AO070322000044	Anaphase-promoting complex (APC), Cdc16 subunit	DO		1.6755847560646 1.23567660162831	1	1	1	0	40	44	41			No EST	No EST
336	GGCGTTTGGG		down	down	53.m03884	AN8059.1	AO070322000124	Mitochondrial import inner membrane translocase, subunit TIM22	U		1.48429	1	2	1	0	94	47	84			170	1
336	GGCGTTTGGG		down	down	62.m03398	AN8672.1	AO070315000089	P-type ATPase				1	1	1	0	148	157	163			No EST	No EST
336	GGCGTTTGGG		down	up	62.m03491	AN8704.1	AO070315000132	60s ribosomal protein L24	J		4.51915	1	1	1	1	48	199	208	73	0
336	GGCGTTTGGG		down	down	66.m04759	AN9086.1	AO070332000191	Transport protein particle (TRAPP) complex subunit	U		1.48429	1	1	2	1	42	32	43			No EST	No EST
336	GGCGTTTGGG		down	down	52.m03849	AN9362.1	AO070315000035	U2 snRNP splicing factor, small subunit, and related proteins	A		2.70465	1	1	1	0	33	21	31			No EST	No EST
344	GGCAAAATdAAC		up	up	54.m06376	AN0373.1	AO070318000051					1	1	2	1	114	345	90	No EST	No EST
344	GGCAAAATdAAC		up	up	70.m15259	AN0655.1	AO070343000571	hypothetical protein [Neurospora crassa]				1	1	1	0	187	362	355	No EST	No EST
344	GGCAAAATdAAC		up	up	70.m15803	AN0810.1	AO070239000005	Extracellular protein SEL-1 and related proteins	MOT		2.04012406070323 4.95255424673632 1.59531876539979	1	1	1	1	184	191	217	No EST	No EST
344	GGCAAAATdAAC		up	up	70.m15019	AN1200.1	AO070331000206	CAATT-binding transcription factor/60S ribosomal subunit biogenesis protein	JK		4.54832475240168 4.21171440392101	1	1	1	1	62	116	110	No EST	No EST
344	GGCAAAATdAAC		up	down	55.m02974	AN1472.1	AO070306000093	Tellurite resistance protein and related permeases	P		3.47939	1	1	1	0	162	117	373			No EST	No EST
344	GGCAAAATdAAC		up	up	69.m15077	AN1778.1	AO070324000018	Ketopantoate hydroxymethyltransferase	H		2.44044	1	1	1	0	373	92	140	No EST	No EST
344	GGCAAAATdAAC		up	up	71.m15938	AN2290.1	AO070295000069	FOG: Zn-finger				1	1	1	1	474	83	121	No EST	No EST
344	GGCAAAATdAAC		up	up	71.m15179	AN2692.1	AO070313000096					1	1	1	1	354	319	259	204	0
344	GGCAAAATdAAC		up	up	59.m09061	AN2933.1	AO070337000174	Phosphatidylserine-specific receptor PtdSerR, contains JmjC domain	BT		2.22297029653099 1.59531876539979	2	1	1	0	239	30	143	No EST	No EST
344	GGCAAAATdAAC		up	down	54.m06799	AN4219.1	AO070315000080	RNA polymerase III subunit C11	K		4.21171	1	1	1	0	230	172	235			No EST	No EST
344	GGCAAAATdAAC		up	up	58.m07928	AN4395.1	AO070261000040	hypothetical protein [Neurospora crassa]				1	1	1	0	443	96	55	762	1
344	GGCAAAATdAAC		up	up	58.m07911	AN4421.1	AO070273000044	Glycolate oxidase	C		4.40716	1	1	1	1	10	283	283	No EST	No EST
344	GGCAAAATdAAC		up	up	58.m07861	AN4471.1	AO070305000130	WD40 repeat-containing protein				1	1	1	1	94	173	285	36	0
344	GGCAAAATdAAC		up	up	54.m06876	AN5144.1	AO070291000029	Fructose-6-phosphate 2-kinase/fructose-2,6-biphosphatase	G		4.70355	1	1	1	0	253	341	111	No EST	No EST
344	GGCAAAATdAAC		up	up	62.m03256	AN6654.1	AO070269000012	Glutamine synthetase	E		4.67693	1	1	1	0	42	93	198	No EST	No EST
344	GGCAAAATdAAC		up	up	53.m03875	AN8029.1	AO070322000075	Na+/K+ transporter	P		3.47939	1	1	1	0	349	96	393	No EST	No EST
347	wmAAAAGTTC		up	up	70.m15249	AN0647.1	AO070343000582	U3 small nucleolar ribonucleoprotein (snoRNP) component	A		1.93973	1	1	1	1	65	264	265	No EST	No EST
347	wmAAAAGTTC		up	up	70.m15127	AN1105.1	AO070285000033	Translocase of outer mitochondrial membrane complex, subunit TOM22	U		0.144705	1	1	1	0	135	94	64	62	0
347	wmAAAAGTTC		up	up	58.m07589	AN1983.1	AO070301000068	WD40 repeat-containing protein				1	1	1	1	134	305	155	No EST	No EST
347	wmAAAAGTTC		up	up	69.m15160	AN2120.1	AO070332000051	Karyopherin (importin) beta 3	YU		0.654716680693002 0.144705130355008	1	1	1	0	245	422	380	No EST	No EST
347	wmAAAAGTTC		up	up	65.m07390	AN3745.1	AO070309000078	Regulator of ribosome synthesis	J	1	0.00225897	1	1	1	1	120	57	69	No EST	No EST
347	wmAAAAGTTC		up	up	58.m07811	AN3832.1	AO070305000070	Mitochondrial elongation factor	J	1	0.00225897	1	1	1	1	81	74	59	No EST	No EST
347	wmAAAAGTTC		up	up	54.m07028	AN4251.1	AO070324000161	Mitochondrial/chloroplast ribosomal protein S2	J	1	0.00225897	2	1	1	1	17	317	248	23	0
347	wmAAAAGTTC		up	up	58.m07861	AN4471.1	AO070305000130	WD40 repeat-containing protein				1	1	1	0	231	180	291	36	0
347	wmAAAAGTTC		up	up	57.m05499	AN4581.1	AO070316000164	Protein involved in high osmolarity signaling pathway	T		0.807367	1	1	1	0	78	110	122	No EST	No EST
347	wmAAAAGTTC		up	up	59.m09234	AN4751.1	AO070327000068	Predicted DEAD-box-containing helicase				1	1	1	0	113	56	62	No EST	No EST
347	wmAAAAGTTC		up	up	59.m08868	AN4965.1	AO070288000030	Negative regulator of transcription	K		2.00279	1	1	1	0	39	130	145	No EST	No EST
347	wmAAAAGTTC		up	up	59.m08913	AN5010.1	AO070224000002	HAT (Half-A-TPR) repeat-containing protein				1	1	1	1	62	130	101	No EST	No EST
347	wmAAAAGTTC		up	down	54.m07022	AN5720.1	AO070324000130	Predicted membrane protein				1	1	2	0	77	91	62			147	1
347	wmAAAAGTTC		up	up	72.m19409	AN6251.1	AO070304000036	Diadenosine and diphosphoinositol polyphosphate phosphohydrolase	T		0.807367	1	1	2	0	337	183	188	No EST	No EST
347	wmAAAAGTTC		up	up	72.m19789	AN7260.1	AO070297000018	Protein involved in the nuclear export of pre-ribosomes	JU	1	0.00225896730723546 0.144705130355008	1	1	1	0	57	35	44	No EST	No EST
347	wmAAAAGTTC		up	up	71.m15986	AN8851.1	AO070271000025	Pseudouridine synthase	J	1	0.00225897	1	1	1	1	133	49	110	92	1
418	CAAACAGTGCAAA		up	up	71.m15415	AN0131.1	AO070321000122	hypothetical protein [Neurospora crassa]				1	1	1	1	165	2	2	No EST	No EST
418	CAAACAGTGCAAA		up	up	71.m15442	AN0167.1	AO070321000079	Translation initiation factor 2B, alpha subunit (eIF-2Balpha/GCN3)	J		3.64753	1	0	0	0	136	0	0	68	1
418	CAAACAGTGCAAA		up	up	71.m15474	AN0211.1	AO070321000033	U2-associated snRNP A' protein	A		0.0690976	1	2	1	0	243	176	72	No EST	No EST
418	CAAACAGTGCAAA		up	up	70.m15056	AN1164.1	AO070331000156	Disrupter of silencing SAS10	B		4.26141	1	1	1	0	118	25	114	No EST	No EST
418	CAAACAGTGCAAA		up	up	70.m15042	AN1175.1	AO070331000170	Nucleolar protein NOP52/RRP1	A		0.0690976	1	1	1	0	151	80	91	No EST	No EST
418	CAAACAGTGCAAA		up	up	70.m14858	AN1371.1	AO070215000010	predicted protein [Neurospora crassa]				1	1	1	0	167	8	269	No EST	No EST
418	CAAACAGTGCAAA		up	up	69.m15042	AN1728.1	AO070324000059	NADH-ubiquinone oxidoreductase, NDUFS3/30 kDa subunit	C		4.89943	1	1	1	0	166	89	81	40	0
418	CAAACAGTGCAAA		up	up	58.m07634	AN2046.1	AO070292000013					1	2	1	0	264	138	131	No EST	No EST
418	CAAACAGTGCAAA		up	up	72.m19688	AN2153.1	AO070343000202	Exosomal 3'-5' exoribonuclease complex, subunit Rrp41 and related exoribonucleases	J		3.64753	1	1	2	1	167	338	104	No EST	No EST
418	CAAACAGTGCAAA		up	up	71.m15831	AN2234.1	AO070326000145	predicted protein [Neurospora crassa]				1	1	1	1	116	28	1	No EST	No EST
418	CAAACAGTGCAAA		up	up	71.m15902	AN2261.1	AO070326000103	Phosphatidylglycerolphosphate synthase	I		3.51563	1	1	1	1	9	48	57	47	0
418	CAAACAGTGCAAA		up	up	59.m08499	AN2490.1	AO070312000130	Uncharacterized conserved protein, contains N-recognin-type Zn-finger				1	1	1	1	133	99	213	No EST	No EST
418	CAAACAGTGCAAA		up	up	59.m08916	AN3082.1	AO070224000004	mRNA cleavage and polyadenylation factor II complex, subunit CFT2 (CPSF subunit)	A		0.0690976	1	1	2	1	244	124	207	No EST	No EST
418	CAAACAGTGCAAA		up	up	59.m08516	AN3147.1	AO070256000043	Glycolipid transfer protein	G		4.42669	2	1	2	0	22	17	18	70	1
418	CAAACAGTGCAAA		up	up	58.m07441	AN3659.1	AO070342000029	Adaptor protein Enigma and related PDZ-LIM proteins	TZ		3.77910280071952 1.67867605822275	1	1	1	0	411	35	37	No EST	No EST
418	CAAACAGTGCAAA		up	up	58.m07838	AN3866.1	AO070305000102	Threonine/serine dehydratases	E		3.7791	2	1	1	0	73	250	94	No EST	No EST
418	CAAACAGTGCAAA		up	up	58.m07866	AN4458.1	AO070305000135	Spindle pole body protein - Sad1p	Z		1.67868	1	1	1	1	106	70	68	No EST	No EST
418	CAAACAGTGCAAA		up	up	58.m07864	AN4460.1	AO070305000133	WD40-repeat-containing subunit of the 18S rRNA processing complex	A		0.0690976	1	1	1	1	156	249	219	No EST	No EST
418	CAAACAGTGCAAA		up	up	59.m09211	AN4771.1	AO070329000081	WD40 repeat protein				1	1	1	1	126	311	330	No EST	No EST
418	CAAACAGTGCAAA		up	up	69.m15498	AN5438.1	AO070333000100	Hsp90 co-chaperone CNS1 (contains TPR repeats)	O		1.51021	1	1	1	1	79	147	155	54	0
418	CAAACAGTGCAAA		up	up	69.m15743	AN5452.1	AO070239000031	Splicing factor 3b, subunit 3	A		0.0690976	2	2	1	0	43	87	56	179	1
418	CAAACAGTGCAAA		up	up	69.m15436	AN5522.1	AO070341000367	predicted protein [Neurospora crassa]				1	1	2	0	258	4	58	No EST	No EST
418	CAAACAGTGCAAA		up	up	69.m14811	AN5786.1	AO070249000032	hypothetical protein [Neurospora crassa]				1	1	1	1	53	53	33	No EST	No EST
418	CAAACAGTGCAAA		up	up	72.m19228	AN5902.1	AO070248000040	Alpha-1,2 glucosyltransferase/transcriptional activator	OKIT		1.51021223864604 1.33930810390672 3.51562528375586 3.77910280071952	2	1	1	0	106	19	25	No EST	No EST
418	CAAACAGTGCAAA		up	up	72.m18993	AN6176.1	AO070340000023	predicted protein [Neurospora crassa]				2	2	1	0	239	132	70	No EST	No EST
418	CAAACAGTGCAAA		up	up	62.m03124	AN6549.1	AO070270000036	RNA polymerase II transcriptional regulation mediator	K		1.33931	1	1	1	1	157	71	78	No EST	No EST
418	CAAACAGTGCAAA		up	up	65.m07278	AN6707.1	AO070339000137	DNA or RNA helicases of superfamily II	KL		1.33930810390672 5.23435349295246	1	1	1	0	78	68	70	No EST	No EST
418	CAAACAGTGCAAA		up	up	71.m16029	AN6921.1	AO070313000060	HSP90 co-chaperone p23	O		1.51021	1	1	1	0	226	64	80	71	1
418	CAAACAGTGCAAA		up	down	72.m19648	AN7600.1	AO070343000270	Sulfite reductase (ferredoxin)	P		5.58791	1	1	1	0	129	70	94			No EST	No EST
418	CAAACAGTGCAAA		up	up	71.m15820	AN7630.1	AO070294000040	Angio-associated migratory cell protein (contains WD40 repeats)				1	0	1	0	260	0	65	31	1
418	CAAACAGTGCAAA		up	up	53.m03779	AN8194.1	AO070310000126	emp24/gp25L/p24 family of membrane trafficking proteins	U		4.75494	1	1	1	1	143	162	176	No EST	No EST
418	CAAACAGTGCAAA		up	up	53.m03758	AN8215.1	AO070310000097	5,10-methylenetetrahydrofolate reductase	E		3.7791	1	1	1	0	346	26	135	No EST	No EST
418	CAAACAGTGCAAA		up	up	62.m03370	AN8699.1	AO070315000126	Ubiquitin-specific protease	O		1.51021	1	2	1	1	137	34	47	46	1
418	CAAACAGTGCAAA		up	up	66.m04582	AN9116.1	AO070332000151	Nicotinic acid phosphoribosyltransferase	H		4.51358	1	2	1	1	188	99	150	No EST	No EST
616	CGCGAAdTCACGTG		up	up	70.m15454	AN0855.1	AO070320000002	DNA repair protein, SNF2 family	L	1	4.59368e-06	1	1	1	1	96	104	117	No EST	No EST
616	CGCGAAdTCACGTG		up	up	70.m15223	AN1005.1	AO070312000029	Gamma-tubulin complex, DGRIP91/SPC98 component	Z		2.72212	1	1	1	0	62	27	56	No EST	No EST
616	CGCGAAdTCACGTG		up	up	70.m14981	AN1237.1	AO070331000251	DNA repair protein RAD51/RHP55	L	1	4.59368e-06	1	1	1	1	284	21	37	No EST	No EST
616	CGCGAAdTCACGTG		up	up	70.m14968	AN1254.1	AO070223000015	FOG: Zn-finger				1	2	1	0	146	100	214	No EST	No EST
616	CGCGAAdTCACGTG		up	up	70.m14915	AN1293.1	AO070303000055	predicted protein [Neurospora crassa]				1	1	1	0	138	174	163	No EST	No EST
616	CGCGAAdTCACGTG		up	up	59.m09039	AN2973.1	AO070337000148	SNF2 family DNA-dependent ATPase	B		2.15559	1	1	1	1	163	15	16	No EST	No EST
616	CGCGAAdTCACGTG		up	down	59.m09280	AN3426.1	AO070327000005	Exosomal 3'-5' exoribonuclease complex, subunit Rrp4	A		4.98931	1	1	1	1	266	104	217			No EST	No EST
616	CGCGAAdTCACGTG		up	up	69.m15402	AN3691.1	AO070341000316	AAA+-type ATPase	O		2.34338	1	1	1	0	236	178	261	No EST	No EST
616	CGCGAAdTCACGTG		up	up	57.m05686	AN3797.1	AO070337000231	3'-5' DNA helicase	L	1	4.59368e-06	1	1	1	0	66	94	119	No EST	No EST
616	CGCGAAdTCACGTG		up	up	69.m15021	AN3909.1	AO070324000094	Translesion DNA polymerase - REV1 deoxycytidyl transferase	L	1	4.59368e-06	1	1	1	0	113	271	119	No EST	No EST
616	CGCGAAdTCACGTG		up	up	59.m08784	AN4888.1	AO070338000070	Thiamine pyrophosphate-requiring enzyme	EH		3.78020198310986 2.34427553434079	1	1	1	0	160	179	206	72	0
616	CGCGAAdTCACGTG		up	up	59.m08882	AN4980.1	AO070288000047	Ribosomal protein S6 kinase and related proteins	T		3.7802	1	1	1	1	233	62	59	No EST	No EST
616	CGCGAAdTCACGTG		up	up	59.m08904	AN5006.1	AO070255000034	Mismatch repair ATPase MSH2 (MutS family)	L	1	4.59368e-06	1	1	1	0	123	59	71	No EST	No EST
616	CGCGAAdTCACGTG		up	up	58.m07509	AN5588.1	AO070328000021	AAA+-type ATPase containing the peptidase M41 domain	O		2.34338	1	1	1	0	272	330	111	164	0
616	CGCGAAdTCACGTG		up	up	72.m19745	AN7325.1	AO070297000077	DNA polymerase delta, catalytic subunit	L	1	4.59368e-06	1	1	1	0	189	105	113	No EST	No EST
616	CGCGAAdTCACGTG		up	up	72.m19562	AN7545.1	AO070277000042	CCAAT-binding factor, subunit B (HAP2)	K		3.61523	1	1	1	0	537	2	2	No EST	No EST
616	CGCGAAdTCACGTG		up	up	57.m05407	AN7649.1	AO070268000005	Mitochondrial import inner membrane translocase, subunit TIM9	U		3.7439	1	1	1	0	155	253	324	30	0
616	CGCGAAdTCACGTG		up	up	62.m03491	AN8704.1	AO070315000132	60s ribosomal protein L24	J		3.75223	1	1	1	1	146	100	108	73	0
616	CGCGAAdTCACGTG		up	up	62.m03468	AN8713.1	AO070315000139	Structure-specific endonuclease ERCC1-XPF, catalytic component XPF/ERCC4	L	1	4.59368e-06	1	1	1	1	58	128	85	4	0
616	CGCGAAdTCACGTG		up	up	66.m04576	AN9109.1	AO070332000159	hypothetical protein [Neurospora crassa]				1	1	2	1	326	109	41	No EST	No EST
652	CTCTCCTTCTCCCC		up	up	71.m15322	AN0048.1	AO070314000127	predicted protein [Neurospora crassa]				1	1	1	0	82	131	74	No EST	No EST
652	CTCTCCTTCTCCCC		up	up	71.m15354	AN0076.1	AO070311000140	5'-3' exonuclease	L		1.36079	2	1	2	0	85	157	3	49	0
652	CTCTCCTTCTCCCC		up	up	71.m15359	AN0081.1	AO070311000136	G-protein beta subunit				2	2	3	0	125	285	317	153	0
652	CTCTCCTTCTCCCC		up	up	71.m15360	AN0082.1	AO070311000135	Conserved phosducin-like protein	T		0.0264659	1	1	1	0	13	518	150	350	0
652	CTCTCCTTCTCCCC		up	up	71.m15366	AN0091.1	AO070311000124	Putative protein methyltransferase involved in meiosis and transcriptional silencing (Dot1)	DK		2.88952327378684 2.84315481300744	1	1	1	0	195	87	80	No EST	No EST
652	CTCTCCTTCTCCCC		up	up	71.m15380	AN0106.1	AO070311000113	Serine/threonine protein kinase	T		0.0264659	1	1	3	0	175	400	57	No EST	No EST
652	CTCTCCTTCTCCCC		up	up	71.m15396	AN0117.1	AO070311000104	Histone H4	B		5.79317	1	1	2	0	50	230	174	No EST	No EST
652	CTCTCCTTCTCCCC		up	up	71.m15423	AN0140.1	AO070321000112	Actin-related protein Arp2/3 complex, subunit Arp3	Z		6.54158	1	1	2	0	178	311	302	148	0
652	CTCTCCTTCTCCCC		up	down	71.m16050	AN0162.1	AO070321000085	Nuclear localization sequence binding protein	K		2.84315	2	1	2	0	335	261	13			153	0
652	CTCTCCTTCTCCCC		up	up	71.m15438	AN0163.1	AO070321000084	Rho GDP-dissociation inhibitor	T		0.0264659	1	1	2	0	315	421	175	No EST	No EST
652	CTCTCCTTCTCCCC		up	up	71.m15479	AN0213.1	AO070323000085					3	1	2	0	423	113	113	354	1
652	CTCTCCTTCTCCCC		up	up	71.m15641	AN0241.1	AO070284000071	Cu2+/Zn2+ superoxide dismutase SOD1	P		5.47872	2	3	3	0	83	55	13	123	1
652	CTCTCCTTCTCCCC		up	up	54.m06529	AN0254.1	AO070334000106	C-3 sterol dehydrogenase/3-beta-hydroxysteroid dehydrogenase and related dehydrogenases	IE		3.77178922161064 4.27325694043449	2	3	2	0	163	102	315	No EST	No EST
652	CTCTCCTTCTCCCC		up	up	54.m06482	AN0287.1	AO070334000066	WD40 repeat protein				2	1	2	0	102	32	231	No EST	No EST
652	CTCTCCTTCTCCCC		up	down	54.m06459	AN0302.1	AO070334000037	Nucleolar GTPase/ATPase p130	Y		1.55271	2	2	2	0	74	152	142			No EST	No EST
652	CTCTCCTTCTCCCC		up	up	54.m06397	AN0357.1	AO070318000033	Cytochrome c1	C	1	0.00648453	1	1	1	1	71	208	214	No EST	No EST
652	CTCTCCTTCTCCCC		up	up	69.m15273	AN0573.1	AO070272000052	Ypt/Rab GTPase activating protein	U		0.494756	1	1	2	0	26	42	106	No EST	No EST
652	CTCTCCTTCTCCCC		up	up	69.m15270	AN0575.1	AO070272000054	Calmodulin-binding protein CRAG, contains DENN domain	T		0.0264659	3	6	4	0	234	48	71	117	1
652	CTCTCCTTCTCCCC		up	up	69.m15252	AN0595.1	AO070280000021	NADP/FAD dependent oxidoreductase	C	1	0.00648453	2	2	3	0	59	220	241	No EST	No EST
652	CTCTCCTTCTCCCC		up	up	70.m15290	AN0687.1	AO070343000527	Spermidine synthase	E		4.27326	1	1	2	0	53	433	284	123	0
652	CTCTCCTTCTCCCC		up	up	70.m15335	AN0726.1	AO070343000481	beta-1,6-N-acetylglucosaminyltransferase, contains WSC domain	GO		4.0708802464128 1.31149382861186	1	1	2	0	208	154	69	170	1
652	CTCTCCTTCTCCCC		up	up	70.m15320	AN0733.1	AO070343000494	Histones H3 and H4	B		5.79317	1	1	1	1	112	267	286	86	0
652	CTCTCCTTCTCCCC		up	up	70.m15361	AN0747.1	AO070343000435	Mitochondrial processing peptidase, beta subunit, and related enzymes (insulinase superfamily)	O		1.31149	1	1	1	0	24	185	226	29	0
652	CTCTCCTTCTCCCC		up	up	70.m15785	AN0775.1	AO070316000063	Glyoxylate/hydroxypyruvate reductase (D-isomer-specific 2-hydroxy acid dehydrogenase superfamily)	C	1	0.00648453	1	1	2	0	107	159	252	87	0
652	CTCTCCTTCTCCCC		up	down	70.m15415	AN0816.1	AO070288000088	RNA polymerase II transcription initiation factor TFIIA, large chain	K		2.84315	1	1	1	0	45	53	49			No EST	No EST
652	CTCTCCTTCTCCCC		up	up	70.m15426	AN0824.1	AO070255000021	Short-chain acyl-CoA dehydrogenase	I		3.77179	3	2	2	0	64	89	85	25	0
652	CTCTCCTTCTCCCC		up	up	70.m15437	AN0837.1	AO070255000006	Splicing coactivator SRm160/300, subunit SRm300	A		3.9185	2	1	2	0	35	133	174	No EST	No EST
652	CTCTCCTTCTCCCC		up	up	70.m15462	AN0866.1	AO070320000017	Molecular chaperones HSP70/HSC70, HSP70 superfamily	O		1.31149	3	2	2	0	62	370	458	No EST	No EST
652	CTCTCCTTCTCCCC		up	up	70.m15456	AN0870.1	AO070320000023	Mitochondrial phosphate carrier protein	C	1	0.00648453	2	2	2	0	56	401	79	15	0
652	CTCTCCTTCTCCCC		up	up	70.m15488	AN0893.1	AO070320000065	Adenylosuccinate synthase	F		2.12347	3	1	1	0	251	79	108	235	1
652	CTCTCCTTCTCCCC		up	up	70.m15515	AN0906.1	AO070320000082	Karyopherin (importin) beta 1	YU		1.55270850176354 0.494755743050251	3	2	5	0	186	460	29	No EST	No EST
652	CTCTCCTTCTCCCC		up	down	70.m15515	AN0906.1	AO070320000082	Karyopherin (importin) beta 1	YU		1.55270850176354 0.494755743050251	1	1	2	0	427	420	302			No EST	No EST
652	CTCTCCTTCTCCCC		up	up	70.m15808	AN0926.1	AO070320000110	Nuclear transport receptor Karyopherin-beta2/Transportin (importin beta superfamily)	YU		1.55270850176354 0.494755743050251	1	2	1	0	111	297	309	No EST	No EST
652	CTCTCCTTCTCCCC		up	up	70.m15540	AN0932.1	AO070320000123	Pyridine nucleotide-disulphide oxidoreductase	Q		1.76551	2	1	1	0	229	141	235	No EST	No EST
652	CTCTCCTTCTCCCC		up	up	70.m15813	AN0937.1	AO070320000128	NITROGEN ASSIMILATION TRANSCRIPTION FACTOR NIT-4 [Neurospora crassa]				2	1	1	0	137	219	55	No EST	No EST
652	CTCTCCTTCTCCCC		up	up	70.m15626	AN0986.1	AO070318000155	PHD Zn-finger proteins				2	3	2	0	404	75	27	No EST	No EST
652	CTCTCCTTCTCCCC		up	up	70.m15221	AN1003.1	AO070312000031	Isocitrate dehydrogenase, alpha subunit	E		4.27326	1	2	1	0	66	142	206	48	0
652	CTCTCCTTCTCCCC		up	up	70.m15195	AN1037.1	AO070336000072	Fatty acid desaturase	I		3.77179	1	3	4	0	390	101	82	No EST	No EST
652	CTCTCCTTCTCCCC		up	up	70.m15203	AN1047.1	AO070313000109	Molecular chaperones HSP105/HSP110/SSE1, HSP70 superfamily	O		1.31149	1	1	3	0	39	376	105	No EST	No EST
652	CTCTCCTTCTCCCC		up	up	70.m15171	AN1062.1	AO070218000006	possible endozepine [Aspergillus fumigatus]				1	1	1	0	142	101	46	No EST	No EST
652	CTCTCCTTCTCCCC		up	up	70.m15141	AN1091.1	AO070285000058	FOG: RRM domain				2	4	1	0	250	7	281	No EST	No EST
652	CTCTCCTTCTCCCC		up	up	70.m15137	AN1094.1	AO070285000053	NADH-dehydrogenase (ubiquinone)	C	1	0.00648453	3	1	2	0	26	377	470	No EST	No EST
652	CTCTCCTTCTCCCC		up	up	70.m15118	AN1117.1	AO070331000109	Putative cargo transport protein ERV29	U		0.494756	2	2	2	0	135	237	276	192	0
652	CTCTCCTTCTCCCC		up	up	70.m15114	AN1126.1	AO070331000119	GTP-binding ADP-ribosylation factor Arf1	U		0.494756	1	2	1	0	254	119	69	108	0
652	CTCTCCTTCTCCCC		up	up	70.m15059	AN1162.1	AO070331000152	Elongation factor 1 beta/delta chain	K		2.84315	1	1	2	0	43	104	118	17	0
652	CTCTCCTTCTCCCC		up	up	70.m15772	AN1165.1	AO070331000157	Predicted 3-ketosphinganine reductase	Q		1.76551	1	1	2	0	127	106	82	No EST	No EST
652	CTCTCCTTCTCCCC		up	up	70.m15040	AN1177.1	AO070331000173	Vesicle coat complex COPI, beta subunit	U		0.494756	2	2	1	1	52	102	166	No EST	No EST
652	CTCTCCTTCTCCCC		up	up	70.m15763	AN1182.1	AO070331000182	Beta tubulin	Z		6.54158	2	1	2	0	94	195	150	No EST	No EST
652	CTCTCCTTCTCCCC		up	up	70.m15003	AN1222.1	AO070331000222	S-adenosylmethionine synthetase	H		4.32628	5	2	2	0	21	157	162	193	1
652	CTCTCCTTCTCCCC		up	up	70.m14994	AN1226.1	AO070331000235	Sirtuin 5 and related class III sirtuins (SIR2 family)	BK		5.79316725520768 2.84315481300744	1	1	3	0	50	54	2	No EST	No EST
652	CTCTCCTTCTCCCC		up	down	70.m14980	AN1238.1	AO070331000252	hypothetical protein [Neurospora crassa]				1	1	1	0	193	124	121			No EST	No EST
652	CTCTCCTTCTCCCC		up	up	70.m14923	AN1284.1	AO070332000035	Predicted GTP-binding protein (ODN superfamily)				3	1	2	0	64	308	178	No EST	No EST
652	CTCTCCTTCTCCCC		up	up	70.m14906	AN1325.1	AO070303000088	Protein interacting with poly(A)-binding protein	A		3.9185	2	3	5	0	256	27	4	No EST	No EST
652	CTCTCCTTCTCCCC		up	up	70.m14896	AN1337.1	AO070303000102	predicted protein [Neurospora crassa]				2	1	3	0	93	134	47	No EST	No EST
652	CTCTCCTTCTCCCC		up	up	70.m15731	AN1358.1	AO070237000002	Serine/threonine protein phosphatase	T		0.0264659	3	3	4	0	93	298	1	400	1
652	CTCTCCTTCTCCCC		up	down	70.m14847	AN1376.1	AO070243000006	Phospholipid methyltransferase	I		3.77179	1	1	1	0	183	182	187			202	1
652	CTCTCCTTCTCCCC		up	up	70.m14845	AN1378.1	AO070243000008	predicted protein [Neurospora crassa]				5	3	4	1	144	119	176	189	1
652	CTCTCCTTCTCCCC		up	down	70.m14845	AN1378.1	AO070243000008	predicted protein [Neurospora crassa]				1	1	3	0	45	103	39			363	1
652	CTCTCCTTCTCCCC		up	up	70.m14826	AN1396.1	AO070233000012	Glycerol-3-phosphate dehydrogenase	C	1	0.00648453	1	3	3	0	358	220	166	No EST	No EST
652	CTCTCCTTCTCCCC		up	up	55.m02936	AN1420.1	AO070232000016	Putative Zn-finger protein				1	4	1	0	9	14	426	No EST	No EST
652	CTCTCCTTCTCCCC		up	up	55.m02933	AN1423.1	AO070232000019	Permease of the major facilitator superfamily				1	1	2	0	292	2	149	No EST	No EST
652	CTCTCCTTCTCCCC		up	up	55.m02926	AN1429.1	AO070242000022	Choline dehydrogenase and related flavoproteins	E		4.27326	1	2	2	0	222	348	436	48	0
652	CTCTCCTTCTCCCC		up	up	55.m03263	AN1437.1	AO070232000002	hypothetical protein [Neurospora crassa]				1	2	1	0	404	14	52	No EST	No EST
652	CTCTCCTTCTCCCC		up	up	55.m03042	AN1523.1	AO070334000241	F0F1-type ATP synthase, alpha subunit	C	1	0.00648453	2	3	3	0	56	310	331	68	0
652	CTCTCCTTCTCCCC		up	up	55.m03061	AN1543.1	AO070339000311	Fumarate reductase, flavoprotein subunit	C	1	0.00648453	1	1	3	0	34	314	162	43	0
652	CTCTCCTTCTCCCC		up	up	55.m03067	AN1547.1	AO070339000307	Acetyl-CoA hydrolase	C	1	0.00648453	3	2	3	0	58	353	27	No EST	No EST
652	CTCTCCTTCTCCCC		up	up	58.m07694	AN1624.1	AO070299000090	Mitochondrial F1F0-ATP synthase, subunit c/ATP9/proteolipid	C	1	0.00648453	4	3	1	0	54	413	439	79	0
652	CTCTCCTTCTCCCC		up	up	58.m07716	AN1630.1	AO070299000035	Catalase (peroxidase I)	P		5.47872	3	1	2	0	72	391	312	69	0
652	CTCTCCTTCTCCCC		up	up	58.m07732	AN1666.1	AO070299000048	Nucleolar GTPase				1	1	1	0	97	113	82	122	1
652	CTCTCCTTCTCCCC		up	up	58.m07772	AN1696.1	AO070305000020	Predicted acyltransferases	I		3.77179	2	1	2	0	458	135	99	No EST	No EST
652	CTCTCCTTCTCCCC		up	down	58.m07773	AN1697.1	AO070305000021	Splicing coactivator SRm160/300, subunit SRm160 (contains PWI domain)	A		3.9185	2	1	1	0	43	11	319			No EST	No EST
652	CTCTCCTTCTCCCC		up	up	69.m15047	AN1744.1	AO070324000052	Predicted sugar phosphate isomerase involved in capsule formation	M		8.18176	1	2	1	0	162	133	58	No EST	No EST
652	CTCTCCTTCTCCCC		up	up	58.m07713	AN1810.1	AO070299000061	Ornithine aminotransferase	E		4.27326	2	1	1	0	0	103	244	33	0
652	CTCTCCTTCTCCCC		up	down	58.m07668	AN1843.1	AO070292000064	Protein involved in meiotic recombination/predicted coiled-coil protein	D		2.88952	2	3	2	0	267	240	276			No EST	No EST
652	CTCTCCTTCTCCCC		up	up	58.m07660	AN1851.1	AO070292000043	Chaperonin complex component, TCP-1 theta subunit (CCT8)	O		1.31149	1	1	1	0	39	116	116	No EST	No EST
652	CTCTCCTTCTCCCC		up	up	69.m14935	AN1917.1	AO070341000123	Mitochondrial oxoglutarate/malate carrier proteins	C	1	0.00648453	1	4	3	0	487	60	145	No EST	No EST
652	CTCTCCTTCTCCCC		up	up	69.m14938	AN1921.1	AO070341000116	Peroxisomal biogenesis protein (peroxin)	U		0.494756	1	1	2	0	187	316	10	No EST	No EST
652	CTCTCCTTCTCCCC		up	up	58.m07338	AN1955.1	AO070342000226					1	2	1	0	177	387	378	49	0
652	CTCTCCTTCTCCCC		up	up	58.m08946	AN1980.1	AO070301000065	Rab6 GTPase activator GAPCenA and related TBC domain proteins				2	2	1	0	136	86	247	No EST	No EST
652	CTCTCCTTCTCCCC		up	up	58.m07644	AN2056.1	AO070292000026	Uncharacterized conserved protein				1	1	2	0	53	337	274	No EST	No EST
652	CTCTCCTTCTCCCC		up	up	57.m05760	AN2062.1	AO070341000205	Molecular chaperones GRP78/BiP/KAR2, HSP70 superfamily	O		1.31149	1	2	2	0	259	100	46	173	1
652	CTCTCCTTCTCCCC		up	up	57.m05768	AN2068.1	AO070341000217	Vigilin	I		3.77179	4	4	3	0	49	23	35	No EST	No EST
652	CTCTCCTTCTCCCC		up	up	57.m05769	AN2069.1	AO070341000218	Cytochrome b5	C	1	0.00648453	4	2	2	0	85	137	135	No EST	No EST
652	CTCTCCTTCTCCCC		up	up	57.m05787	AN2086.1	AO070341000244	Nuclear pore complex, Nup214/CAN component	YU		1.55270850176354 0.494755743050251	2	1	3	0	71	211	108	No EST	No EST
652	CTCTCCTTCTCCCC		up	up	69.m15160	AN2120.1	AO070332000051	Karyopherin (importin) beta 3	YU		1.55270850176354 0.494755743050251	2	1	2	0	175	233	148	No EST	No EST
652	CTCTCCTTCTCCCC		up	up	72.m19708	AN2133.1	AO070278000026	Armadillo/beta-Catenin/plakoglobin	TZ		0.0264658986385493 6.54158420983836	1	1	1	0	185	84	157	No EST	No EST
652	CTCTCCTTCTCCCC		up	up	72.m19704	AN2136.1	AO070343000181	hypothetical protein [Neurospora crassa]				1	2	2	0	116	43	11	No EST	No EST
652	CTCTCCTTCTCCCC		up	up	72.m19703	AN2137.1	AO070343000182	Cyclin B and related kinase-activating proteins	D		2.88952	2	3	2	0	92	101	172	No EST	No EST
652	CTCTCCTTCTCCCC		up	up	72.m19699	AN2142.1	AO070343000188	Karyopherin (importin) alpha	U		0.494756	2	2	1	0	41	48	53	No EST	No EST
652	CTCTCCTTCTCCCC		up	up	72.m19690	AN2151.1	AO070343000200	Splicing coactivator SRm160/300, subunit SRm300	A		3.9185	1	2	2	0	326	72	72	No EST	No EST
652	CTCTCCTTCTCCCC		up	up	72.m19677	AN2163.1	AO070343000222	Mitotic spindle checkpoint protein	D		2.88952	2	2	5	0	367	5	35	242	1
652	CTCTCCTTCTCCCC		up	up	72.m19038	AN2185.1	AO070340000081	Mitochondrial endonuclease	F		2.12347	1	1	1	0	67	465	459	No EST	No EST
652	CTCTCCTTCTCCCC		up	up	71.m15847	AN2215.1	AO070326000186	Uncharacterized conserved protein, contains GRAM domain				1	1	2	0	180	206	43	No EST	No EST
652	CTCTCCTTCTCCCC		up	up	71.m15846	AN2219.1	AO070326000185	related to ahmp1 protein [MIPS] [Neurospora crassa]				2	2	1	0	14	284	12	No EST	No EST
652	CTCTCCTTCTCCCC		up	up	71.m15889	AN2251.1	AO070326000115	Predicted membrane protein				1	1	1	0	214	276	188	No EST	No EST
652	CTCTCCTTCTCCCC		up	up	71.m15917	AN2272.1	AO070295000048	Possible pfkB family carbohydrate kinase	G		4.07088	1	2	2	0	70	57	49	91	1
652	CTCTCCTTCTCCCC		up	up	71.m15923	AN2278.1	AO070295000054	Chromatin remodeling complex SWI/SNF, component SWI2 and related ATPases (DNA/RNA helicase superfamily)	BK		5.79316725520768 2.84315481300744	2	2	2	1	312	136	102	No EST	No EST
652	CTCTCCTTCTCCCC		up	up	71.m15925	AN2280.1	AO070295000057	Uncharacterized conserved protein				2	2	1	0	185	343	306	No EST	No EST
652	CTCTCCTTCTCCCC		up	up	71.m15938	AN2290.1	AO070295000069	FOG: Zn-finger				2	3	3	0	358	26	14	No EST	No EST
652	CTCTCCTTCTCCCC		up	up	71.m15946	AN2297.1	AO070295000078	hypothetical protein [Neurospora crassa]				1	2	2	1	206	66	38	No EST	No EST
652	CTCTCCTTCTCCCC		up	up	71.m15519	AN2315.1	AO070323000037	F0F1-type ATP synthase, beta subunit	C	1	0.00648453	3	2	3	1	48	309	495	104	0
652	CTCTCCTTCTCCCC		up	down	71.m15519	AN2315.1	AO070323000037	F0F1-type ATP synthase, beta subunit	C	1	0.00648453	1	2	1	1	145	89	142			307	1
652	CTCTCCTTCTCCCC		up	up	72.m19478	AN2425.1	AO070241000006	Protein phosphatase, regulatory subunit PPP1R3C/D	OT		1.31149382861186 0.0264658986385493	1	1	2	0	209	156	143	No EST	No EST
652	CTCTCCTTCTCCCC		up	up	69.m15223	AN2435.1	AO070264000043	ATP-citrate lyase	C	1	0.00648453	4	5	3	0	114	163	158	187	1
652	CTCTCCTTCTCCCC		up	up	59.m08455	AN2525.1	AO070286000098	Serine racemase	TE		0.0264658986385493 4.27325694043449	1	1	1	0	42	36	3	No EST	No EST
652	CTCTCCTTCTCCCC		up	up	54.m06673	AN2731.1	AO070338000213	Molecular chaperone (DnaJ superfamily)	O		1.31149	2	1	2	0	98	308	353	113	0
652	CTCTCCTTCTCCCC		up	down	54.m06688	AN2743.1	AO070338000228	Translation initiation factor 3, subunit a (eIF-3a)	J		1.42402	2	2	1	0	76	57	230			No EST	No EST
652	CTCTCCTTCTCCCC		up	up	54.m06682	AN2750.1	AO070338000222					3	1	2	0	117	256	166	No EST	No EST
652	CTCTCCTTCTCCCC		up	down	54.m06682	AN2750.1	AO070338000222					2	1	3	0	102	144	18			No EST	No EST
652	CTCTCCTTCTCCCC		up	up	59.m09254	AN2757.1	AO070327000036	Uncharacterized conserved protein TEX2, contains PH domain				1	2	3	0	184	337	190	No EST	No EST
652	CTCTCCTTCTCCCC		up	up	59.m09263	AN2761.1	AO070327000023	Ubiquitin-protein ligase	O		1.31149	4	1	4	0	146	280	131	144	0
652	CTCTCCTTCTCCCC		up	up	59.m08697	AN2855.1	AO070338000169	FOG: Zn-finger				6	3	1	0	99	168	278	180	1
652	CTCTCCTTCTCCCC		up	down	59.m08704	AN2860.1	AO070338000162	Alcohol dehydrogenase, class V	Q		1.76551	1	1	2	0	252	390	55			No EST	No EST
652	CTCTCCTTCTCCCC		up	up	59.m08713	AN2868.1	AO070338000154	Oligoribonuclease (3'->5' exoribonuclease)	A		3.9185	2	1	1	0	3	379	137	No EST	No EST
652	CTCTCCTTCTCCCC		up	up	59.m08719	AN2871.1	AO070338000143	SWI-SNF chromatin-remodeling complex protein	B		5.79317	4	4	5	0	237	79	44	No EST	No EST
652	CTCTCCTTCTCCCC		up	up	59.m08724	AN2875.1	AO070338000136	Fructose 1,6-bisphosphate aldolase	G		4.07088	2	2	5	0	52	180	101	43	0
652	CTCTCCTTCTCCCC		up	up	59.m08731	AN2884.1	AO070338000130					2	2	2	0	406	32	94	No EST	No EST
652	CTCTCCTTCTCCCC		up	down	59.m08751	AN2901.1	AO070338000106	Arginase	E		4.27326	1	1	1	0	31	178	260			67	0
652	CTCTCCTTCTCCCC		up	up	59.m09396	AN2911.1	AO070338000094	Transcriptional activator FOSB/c-Fos and related bZIP transcription factors	K		2.84315	4	2	1	0	90	43	48	No EST	No EST
652	CTCTCCTTCTCCCC		up	up	59.m09062	AN2932.1	AO070337000175	Translation initiation factor 4F, helicase subunit (eIF-4A) and related helicases	J		1.42402	1	2	1	0	286	68	84	275	1
652	CTCTCCTTCTCCCC		up	down	59.m09055	AN2939.1	AO070337000169	Ca2+-binding transmembrane protein LETM1/MRS7				1	1	1	0	28	83	46			239	1
652	CTCTCCTTCTCCCC		up	up	59.m09023	AN2989.1	AO070337000133	FOG: RRM domain				1	3	6	0	90	382	13	183	0
652	CTCTCCTTCTCCCC		up	up	59.m08981	AN3036.1	AO070337000078	predicted protein [Neurospora crassa]				1	1	1	0	502	26	32	No EST	No EST
652	CTCTCCTTCTCCCC		up	down	59.m08979	AN3038.1	AO070337000055	hypothetical protein [Neurospora crassa]				2	1	1	0	261	202	482			41	0
652	CTCTCCTTCTCCCC		up	up	59.m08957	AN3058.1	AO070337000016	Glycine/serine hydroxymethyltransferase	E		4.27326	2	1	2	0	70	394	385	66	0
652	CTCTCCTTCTCCCC		up	up	59.m08959	AN3059.1	AO070337000014	Phosphoglycerate mutase	G		4.07088	2	2	4	0	139	14	19	25	1
652	CTCTCCTTCTCCCC		up	up	59.m08921	AN3075.1	AO070224000009	hypothetical protein [Neurospora crassa]				2	1	2	0	206	370	263	No EST	No EST
652	CTCTCCTTCTCCCC		up	up	59.m08644	AN3100.1	AO070334000141	predicted protein [Neurospora crassa]				4	2	1	1	216	206	294	106	0
652	CTCTCCTTCTCCCC		up	up	59.m08628	AN3110.1	AO070303000041	3-phosphoinositide-dependent protein kinase (PDK1)	T		0.0264659	1	4	2	0	165	119	197	391	1
652	CTCTCCTTCTCCCC		up	up	59.m08626	AN3112.1	AO070303000038	Protoporphyrinogen oxidase	H		4.32628	4	4	2	0	70	36	365	57	1
652	CTCTCCTTCTCCCC		up	down	59.m09373	AN3113.1	AO070303000036	Glucose-6-phosphate/phosphate and phosphoenolpyruvate/phosphate antiporter	GE		4.0708802464128 4.27325694043449	2	1	1	0	234	304	110			No EST	No EST
652	CTCTCCTTCTCCCC		up	up	59.m08623	AN3114.1	AO070303000035	predicted protein [Neurospora crassa]				2	1	5	0	253	124	272	No EST	No EST
652	CTCTCCTTCTCCCC		up	up	67.m02904	AN3304.1	AO070274000035	Amino acid transporters	E		4.27326	1	1	2	0	56	291	79	No EST	No EST
652	CTCTCCTTCTCCCC		up	up	66.m04646	AN3376.1	AO070281000020	Squalene synthetase	I		3.77179	2	2	3	0	15	82	75	298	1
652	CTCTCCTTCTCCCC		up	up	66.m04618	AN3416.1	AO070203000005	SNARE protein Syntaxin 1 and related proteins	U		0.494756	1	3	1	0	230	145	288	No EST	No EST
652	CTCTCCTTCTCCCC		up	up	58.m07376	AN3578.1	AO070342000171	Predicted MutS-related protein involved in mismatch repair	L		1.36079	1	3	2	0	429	58	99	No EST	No EST
652	CTCTCCTTCTCCCC		up	up	58.m07379	AN3581.1	AO070342000168	Thioredoxin reductase	O		1.31149	3	1	1	1	148	33	210	163	1
652	CTCTCCTTCTCCCC		up	up	58.m07392	AN3592.1	AO070342000144	Calnexin	O		1.31149	2	2	1	0	131	288	239	126	0
652	CTCTCCTTCTCCCC		up	up	58.m07398	AN3600.1	AO070342000153	hypothetical protein [Neurospora crassa]				1	1	1	0	281	357	251	276	0
652	CTCTCCTTCTCCCC		up	up	58.m07399	AN3602.1	AO070342000154	Glucose-repressible alcohol dehydrogenase transcriptional effector CCR4 and related proteins	K		2.84315	3	2	1	1	92	340	357	No EST	No EST
652	CTCTCCTTCTCCCC		up	up	58.m07414	AN3627.1	AO070342000123	hypothetical protein [Neurospora crassa]				1	1	1	0	421	412	325	212	0
652	CTCTCCTTCTCCCC		up	up	58.m07442	AN3658.1	AO070342000030	Monocarboxylate transporter	G		4.07088	1	2	1	0	236	222	390	No EST	No EST
652	CTCTCCTTCTCCCC		up	up	58.m07434	AN3664.1	AO070342000020	C-type lectin	TV		0.0264658986385493 10.2607274006116	2	2	1	0	154	92	393	248	1
652	CTCTCCTTCTCCCC		up	up	58.m07428	AN3667.1	AO070342000004	HMG-box transcription factor	K		2.84315	2	2	1	0	224	49	73	No EST	No EST
652	CTCTCCTTCTCCCC		up	up	69.m15386	AN3729.1	AO070342000283	1,3-beta-glucan synthase/callose synthase catalytic subunit	M		8.18176	4	2	2	1	386	11	15	No EST	No EST
652	CTCTCCTTCTCCCC		up	down	69.m15380	AN3735.1	AO070342000272	GTPase-activating protein				1	1	1	0	360	320	285			No EST	No EST
652	CTCTCCTTCTCCCC		up	up	65.m07375	AN3752.1	AO070309000065	Uncharacterized conserved protein, contains TBC domain	T		0.0264659	2	1	2	0	296	139	5	471	1
652	CTCTCCTTCTCCCC		up	up	69.m15012	AN3915.1	AO070324000102	Aquaporin (major intrinsic protein family)	G		4.07088	1	0	1	0	345	0	185	No EST	No EST
652	CTCTCCTTCTCCCC		up	down	69.m14999	AN3929.1	AO070341000037	Permease of the major facilitator superfamily	G		4.07088	1	0	1	0	496	141	345			No EST	No EST
652	CTCTCCTTCTCCCC		up	up	54.m06579	AN4015.1	AO070328000151	Translation initiation factor 5A (eIF-5A)	J		1.42402	2	2	2	0	96	141	198	70	0
652	CTCTCCTTCTCCCC		up	up	54.m06570	AN4042.1	AO070328000135	Cytochrome P450 CYP4/CYP19/CYP26 subfamilies	QI		1.7655108524824 3.77178922161064	1	1	3	0	20	411	347	No EST	No EST
652	CTCTCCTTCTCCCC		up	up	54.m06564	AN4046.1	AO070328000129	Predicted hydrolase/acyltransferase (alpha/beta hydrolase superfamily)				1	1	2	1	86	14	82	No EST	No EST
652	CTCTCCTTCTCCCC		up	up	58.m07369	AN4148.1	AO070342000182	Predicted transporter (major facilitator superfamily)				1	3	1	0	543	89	437	No EST	No EST
652	CTCTCCTTCTCCCC		up	up	69.m14951	AN4169.1	AO070341000094	hypothetical protein [Neurospora crassa]				2	2	3	0	274	181	53	No EST	No EST
652	CTCTCCTTCTCCCC		up	up	54.m06745	AN4189.1	AO070342000110	Mitogen-activated protein kinase kinase (MAP2K)	T		0.0264659	1	2	2	0	369	9	95	No EST	No EST
652	CTCTCCTTCTCCCC		up	up	54.m06772	AN4215.1	AO070231000009	Glutaredoxin and related proteins	O		1.31149	1	3	1	0	85	224	422	No EST	No EST
652	CTCTCCTTCTCCCC		up	up	54.m06800	AN4218.1	AO070315000081	Translation elongation factor EF-1 alpha/Tu	J		1.42402	5	3	2	1	125	260	316	96	0
652	CTCTCCTTCTCCCC		up	up	54.m06779	AN4236.1	AO070234000007	26S proteasome regulatory complex, ATPase RPT5	O		1.31149	2	1	2	0	80	92	66	No EST	No EST
652	CTCTCCTTCTCCCC		up	up	54.m07034	AN4238.1	AO070234000002	Ribosomal protein S6 kinase and related proteins	T		0.0264659	1	1	1	0	217	278	52	No EST	No EST
652	CTCTCCTTCTCCCC		up	up	65.m07433	AN4259.1	AO070277000032	Uncharacterized conserved protein, contains PCI domain				2	1	1	0	20	166	137	10	0
652	CTCTCCTTCTCCCC		up	down	65.m07454	AN4276.1	AO070277000008	FOG: Transposon-encoded proteins with TYA, reverse transcriptase, integrase domains in various combinations				2	1	1	0	21	277	361			No EST	No EST
652	CTCTCCTTCTCCCC		up	up	58.m08010	AN4314.1	AO070230000002	predicted protein [Neurospora crassa]				4	3	1	0	99	35	129	No EST	No EST
652	CTCTCCTTCTCCCC		up	up	58.m07962	AN4361.1	AO070261000004	Transcriptional activator FOSB/c-Fos and related bZIP transcription factors	K		2.84315	1	2	3	0	242	209	155	263	1
652	CTCTCCTTCTCCCC		up	up	58.m07927	AN4394.1	AO070261000039					1	1	2	0	31	246	45	No EST	No EST
652	CTCTCCTTCTCCCC		up	up	58.m08982	AN4411.1	AO070273000031	hypothetical protein ( (AL513462) related to Sts1 protein [Neurospora crassa] )				4	3	2	0	75	76	80	No EST	No EST
652	CTCTCCTTCTCCCC		up	up	58.m07889	AN4437.1	AO070273000018	SOK1 kinase belonging to the STE20/SPS1/GC kinase family	T		0.0264659	1	1	2	0	248	200	249	No EST	No EST
652	CTCTCCTTCTCCCC		up	up	58.m07882	AN4443.1	AO070273000010	Methionine synthase II (cobalamin-independent)	E		4.27326	3	4	4	0	59	190	50	66	0
652	CTCTCCTTCTCCCC		up	up	58.m07847	AN4462.1	AO070305000113	Pyruvate carboxylase	C	1	0.00648453	2	2	5	0	130	228	12	No EST	No EST
652	CTCTCCTTCTCCCC		up	down	58.m07860	AN4470.1	AO070305000129	Translation initiation factor 2, gamma subunit (eIF-2gamma; GTPase)	J		1.42402	1	1	1	0	401	78	49			No EST	No EST
652	CTCTCCTTCTCCCC		up	up	57.m05654	AN4479.1	AO070311000025	FOG: HAMP domain	T		0.0264659	2	3	3	0	201	51	166	No EST	No EST
652	CTCTCCTTCTCCCC		up	up	57.m05648	AN4483.1	AO070311000032	Ca2+/calmodulin-dependent protein kinase, EF-Hand protein superfamily	T		0.0264659	3	1	3	0	57	388	49	No EST	No EST
652	CTCTCCTTCTCCCC		up	up	57.m05635	AN4496.1	AO070311000048	Predicted E3 ubiquitin ligase	O		1.31149	1	3	2	0	30	64	90	No EST	No EST
652	CTCTCCTTCTCCCC		up	up	57.m05604	AN4524.1	AO070321000132	predicted protein [Neurospora crassa]				1	1	2	0	200	111	106	No EST	No EST
652	CTCTCCTTCTCCCC		up	up	57.m05554	AN4563.1	AO070321000191	Casein kinase (serine/threonine/tyrosine protein kinase)	T		0.0264659	3	2	1	0	62	70	80	No EST	No EST
652	CTCTCCTTCTCCCC		up	up	71.m15682	AN4696.1	AO070329000189	Splicing coactivator SRm160/300, subunit SRm300	A		3.9185	1	2	2	0	315	286	116	No EST	No EST
652	CTCTCCTTCTCCCC		up	up	71.m15501	AN4732.1	AO070323000052	predicted protein [Neurospora crassa]				2	2	3	0	298	145	91	444	1
652	CTCTCCTTCTCCCC		up	up	59.m09236	AN4743.1	AO070327000077	Ras-related small GTPase, Rho type				2	2	4	0	375	199	82	100	0
652	CTCTCCTTCTCCCC		up	up	59.m09227	AN4756.1	AO070327000060	DNA-binding protein C1D involved in regulation of double-strand break repair	L		1.36079	1	1	1	0	175	15	12	No EST	No EST
652	CTCTCCTTCTCCCC		up	up	59.m09204	AN4779.1	AO070329000071	NIPSNAP1 protein				3	3	1	0	140	51	313	No EST	No EST
652	CTCTCCTTCTCCCC		up	up	59.m09459	AN4820.1	AO070327000167	Aldehyde dehydrogenase	C	1	0.00648453	1	1	2	0	26	470	175	23	0
652	CTCTCCTTCTCCCC		up	up	59.m09466	AN4859.1	AO070329000143	Plasma membrane H+-transporting ATPase	P		5.47872	3	1	3	1	109	316	305	103	0
652	CTCTCCTTCTCCCC		up	up	59.m09409	AN4880.1	AO070338000081	Jacalin-like lectin domain-containing protein				3	1	1	0	167	511	211	No EST	No EST
652	CTCTCCTTCTCCCC		up	up	59.m08826	AN4923.1	AO070338000020	Hydroxymethylglutaryl-CoA synthase	I		3.77179	3	2	4	0	40	403	314	172	0
652	CTCTCCTTCTCCCC		up	up	59.m08856	AN4951.1	AO070288000003	Membrane coat complex Retromer, subunit VPS35	U		0.494756	1	1	2	0	83	272	206	186	0
652	CTCTCCTTCTCCCC		up	up	59.m08858	AN4953.1	AO070288000006	Ras-related small GTPase, Rho type				3	1	2	0	211	218	82	345	1
652	CTCTCCTTCTCCCC		up	up	59.m08876	AN4973.1	AO070288000039	predicted protein [Neurospora crassa]				2	2	1	0	248	42	257	No EST	No EST
652	CTCTCCTTCTCCCC		up	up	59.m08890	AN4987.1	AO070288000055	cAMP-dependent protein kinase types I and II, regulatory subunit	T		0.0264659	1	1	3	0	51	268	257	No EST	No EST
652	CTCTCCTTCTCCCC		up	up	59.m08894	AN4991.1	AO070288000071	aureobasidin-resistance protein; AurA [Aspergillus nidulans]				2	1	1	0	51	111	48	420	1
652	CTCTCCTTCTCCCC		up	up	59.m09454	AN4997.1	AO070288000080	Phosphatidylinositol transfer protein SEC14 and related proteins	I		3.77179	1	2	3	0	114	127	7	No EST	No EST
652	CTCTCCTTCTCCCC		up	up	59.m08669	AN5057.1	AO070338000201	Protein tyrosine phosphatase CDC14	V		10.2607	2	1	1	0	381	164	169	No EST	No EST
652	CTCTCCTTCTCCCC		up	up	54.m06903	AN5121.1	AO070291000058	26S proteasome regulatory complex, subunit RPN8/PSMD7	O		1.31149	1	1	1	0	155	205	185	No EST	No EST
652	CTCTCCTTCTCCCC		up	up	54.m06894	AN5129.1	AO070291000048	Molecular chaperones HSP70/HSC70, HSP70 superfamily	O		1.31149	3	1	2	0	5	478	331	141	0
652	CTCTCCTTCTCCCC		up	up	54.m06889	AN5134.1	AO070291000041	Glutamate synthase	E		4.27326	2	2	2	0	266	251	194	No EST	No EST
652	CTCTCCTTCTCCCC		up	up	69.m14882	AN5151.1	AO070237000013	Predicted membrane proteins, contain hemolysin III domain	T		0.0264659	2	0	3	0	282	0	33	228	1
652	CTCTCCTTCTCCCC		up	up	54.m06857	AN5166.1	AO070291000006	CDP-diacylglycerol synthase	I		3.77179	1	1	3	0	147	120	100	No EST	No EST
652	CTCTCCTTCTCCCC		up	up	69.m14907	AN5210.1	AO070337000270	Pyruvate kinase	G		4.07088	3	1	2	0	71	425	46	60	0
652	CTCTCCTTCTCCCC		up	up	57.m05706	AN5226.1	AO070337000252	Predicted membrane protein				2	1	3	0	97	220	228	No EST	No EST
652	CTCTCCTTCTCCCC		up	up	69.m15562	AN5344.1	AO070333000180	Ubiquitin-protein ligase	O		1.31149	1	2	1	0	178	32	138	No EST	No EST
652	CTCTCCTTCTCCCC		up	up	69.m15551	AN5356.1	AO070333000156	Mitochondrial carnitine-acylcarnitine carrier protein	C	1	0.00648453	2	3	2	0	50	240	222	No EST	No EST
652	CTCTCCTTCTCCCC		up	up	69.m15505	AN5404.1	AO070333000090	Reticulon	U		0.494756	1	2	4	0	190	252	286	No EST	No EST
652	CTCTCCTTCTCCCC		up	up	69.m15492	AN5442.1	AO070333000105	Serine carboxypeptidases (lysosomal cathepsin A)	OE		1.31149382861186 4.27325694043449	3	1	1	0	51	23	20	82	1
652	CTCTCCTTCTCCCC		up	up	69.m15489	AN5445.1	AO070333000112					1	2	4	0	273	257	206	No EST	No EST
652	CTCTCCTTCTCCCC		up	up	69.m15483	AN5449.1	AO070239000028	Arylsulfatase A and related enzymes	P		5.47872	3	3	2	0	153	236	231	No EST	No EST
652	CTCTCCTTCTCCCC		up	up	69.m15746	AN5482.1	AO070341000403	GTPase Ran/TC4/GSP1 (nuclear protein transport pathway), small G protein superfamily	U		0.494756	1	2	1	0	138	138	302	124	0
652	CTCTCCTTCTCCCC		up	up	69.m15460	AN5493.1	AO070341000392	Concentrative Na+-nucleoside cotransporter CNT1/CNT2	FP		2.12346893341593 5.47872319697198	1	1	1	0	159	75	32	No EST	No EST
652	CTCTCCTTCTCCCC		up	up	58.m07475	AN5529.1	AO070328000064	NDR and related serine/threonine kinases				2	2	3	0	104	290	107	No EST	No EST
652	CTCTCCTTCTCCCC		up	up	58.m07508	AN5589.1	AO070328000022	Ribulose kinase and related carbohydrate kinases	G		4.07088	2	2	1	0	246	356	180	439	1
652	CTCTCCTTCTCCCC		up	up	58.m07528	AN5604.1	AO070301000002	Fructose-1,6-bisphosphatase	G		4.07088	1	1	0	0	165	44	0	181	1
652	CTCTCCTTCTCCCC		up	up	58.m07549	AN5626.1	AO070301000025	Acyl-CoA synthetase	I		3.77179	3	4	4	0	270	133	87	66	0
652	CTCTCCTTCTCCCC		up	up	65.m07399	AN5673.1	AO070309000086	hypothetical protein [Neurospora crassa]				1	1	1	0	200	125	148	No EST	No EST
652	CTCTCCTTCTCCCC		up	up	65.m07414	AN5688.1	AO070309000104	Cyclopropane fatty acid synthase and related methyltransferases	M		8.18176	1	1	2	0	27	269	336	No EST	No EST
652	CTCTCCTTCTCCCC		up	up	54.m06825	AN5710.1	AO070324000150	Cytosolic sorting protein GGA2/TOM1	U		0.494756	1	1	1	0	36	46	51	No EST	No EST
652	CTCTCCTTCTCCCC		up	up	54.m06840	AN5719.1	AO070324000131	60s acidic ribosomal protein P1	J		1.42402	2	2	2	0	45	181	9	101	0
652	CTCTCCTTCTCCCC		up	up	69.m14857	AN5740.1	AO070341000019	Ras-related small GTPase, Rho type				3	1	4	0	257	189	225	83	0
652	CTCTCCTTCTCCCC		up	up	69.m14855	AN5758.1	AO070341000017	Guanine nucleotide exchange factor	U		0.494756	3	1	1	0	76	157	114	No EST	No EST
652	CTCTCCTTCTCCCC		up	up	72.m18960	AN5832.1	AO070260000013	Ras-related GTPase				1	3	3	0	119	26	73	No EST	No EST
652	CTCTCCTTCTCCCC		up	up	72.m18963	AN5835.1	AO070260000010	Glycine/serine hydroxymethyltransferase	E		4.27326	1	1	1	0	316	422	452	No EST	No EST
652	CTCTCCTTCTCCCC		up	up	72.m19247	AN5884.1	AO070245000024	Uridine 5'- monophosphate synthase/orotate phosphoribosyltransferase	F		2.12347	2	1	1	0	157	112	144	No EST	No EST
652	CTCTCCTTCTCCCC		up	up	72.m19202	AN5929.1	AO070340000354	Calcium-responsive transcription coactivator	K		2.84315	2	2	1	0	137	335	203	No EST	No EST
652	CTCTCCTTCTCCCC		up	up	72.m19952	AN5931.1	AO070340000344	ATP-dependent RNA helicase	A		3.9185	2	3	3	0	163	68	64	111	1
652	CTCTCCTTCTCCCC		up	up	72.m19141	AN5999.1	AO070340000277	Multifunctional pyrimidine synthesis protein CAD (includes carbamoyl-phophate synthetase, aspartate transcarbamylase, and glutamine amidotransferase)				1	1	1	0	229	171	254	No EST	No EST
652	CTCTCCTTCTCCCC		up	up	72.m19133	AN6010.1	AO070340000269	Molecular chaperones mortalin/PBP74/GRP75, HSP70 superfamily	O		1.31149	3	3	2	0	125	371	325	149	0
652	CTCTCCTTCTCCCC		up	up	72.m19936	AN6017.1	AO070340000258	Translation initiation factor 3, subunit g (eIF-3g)	J		1.42402	3	1	3	0	146	126	343	No EST	No EST
652	CTCTCCTTCTCCCC		up	up	72.m19080	AN6089.1	AO070340000143	Mitochondrial chaperonin, Cpn60/Hsp60p	O		1.31149	1	3	2	0	112	162	170	140	0
652	CTCTCCTTCTCCCC		up	up	72.m19041	AN6119.1	AO070340000085	Zinc carboxypeptidase				1	1	1	0	6	410	476	No EST	No EST
652	CTCTCCTTCTCCCC		up	up	72.m19295	AN6195.1	AO070308000098	FOG: Zn-finger				2	4	4	0	449	42	8	386	1
652	CTCTCCTTCTCCCC		up	up	72.m19434	AN6221.1	AO070304000053	GATA-4/5/6 transcription factors	K		2.84315	2	1	1	0	37	372	447	No EST	No EST
652	CTCTCCTTCTCCCC		up	down	72.m19420	AN6233.1	AO070304000087	Molecular chaperone (DnaJ superfamily)	O		1.31149	1	2	1	0	102	441	24			No EST	No EST
652	CTCTCCTTCTCCCC		up	down	72.m19414	AN6243.1	AO070304000097	MAPK related serine/threonine protein kinase	T		0.0264659	1	1	2	0	27	157	80			No EST	No EST
652	CTCTCCTTCTCCCC		up	down	72.m19980	AN6247.1	AO070304000102	predicted protein [Neurospora crassa]				2	2	1	0	76	17	252			No EST	No EST
652	CTCTCCTTCTCCCC		up	up	72.m19409	AN6251.1	AO070304000036	Diadenosine and diphosphoinositol polyphosphate phosphohydrolase	T		0.0264659	2	1	2	0	482	17	15	No EST	No EST
652	CTCTCCTTCTCCCC		up	up	72.m19981	AN6254.1	AO070304000034	Mitochondrial oxoglutarate/malate carrier proteins	C	1	0.00648453	1	1	1	0	47	103	190	No EST	No EST
652	CTCTCCTTCTCCCC		up	up	72.m19363	AN6277.1	AO070304000003	Synaptic vesicle transporter SVOP and related transporters (major facilitator superfamily)				2	4	2	0	187	126	212	No EST	No EST
652	CTCTCCTTCTCCCC		up	down	62.m03075	AN6487.1	AO070222000002	Aspartyl protease	O		1.31149	1	1	1	0	106	153	117			58	0
652	CTCTCCTTCTCCCC		up	up	62.m03114	AN6525.1	AO070270000024	Glyoxylate/hydroxypyruvate reductase (D-isomer-specific 2-hydroxy acid dehydrogenase superfamily)	C	1	0.00648453	2	1	1	0	230	53	46	No EST	No EST
652	CTCTCCTTCTCCCC		up	up	62.m03135	AN6538.1	AO070270000046	LRR-containing protein				3	4	4	0	297	156	128	No EST	No EST
652	CTCTCCTTCTCCCC		up	up	62.m03155	AN6568.1	AO070326000011	Uncharacterized conserved protein				1	2	1	0	92	48	230	No EST	No EST
652	CTCTCCTTCTCCCC		up	up	62.m03158	AN6578.1	AO070326000025	Gluconate transport-inducing protein	TG		0.0264658986385493 4.0708802464128	2	1	1	0	172	178	294	No EST	No EST
652	CTCTCCTTCTCCCC		up	up	62.m03177	AN6588.1	AO070326000036					4	2	2	0	426	20	32	414	1
652	CTCTCCTTCTCCCC		up	up	62.m03234	AN6639.1	AO070326000091	Uncharacterized protein involved in propionate catabolism				3	1	2	0	14	242	217	21	0
652	CTCTCCTTCTCCCC		up	up	62.m03250	AN6650.1	AO070269000001	Citrate synthase	C	1	0.00648453	1	2	1	0	43	358	334	No EST	No EST
652	CTCTCCTTCTCCCC		up	up	62.m03251	AN6651.1	AO070269000002	ATPase component of ABC transporters with duplicated ATPase domains/Translation elongation factor EF-3b	EJ		4.27325694043449 1.42402407718168	1	1	1	0	17	231	317	No EST	No EST
652	CTCTCCTTCTCCCC		up	up	62.m03302	AN6669.1	AO070321000010	Predicted transporter (major facilitator superfamily)				3	2	2	0	82	388	409	No EST	No EST
652	CTCTCCTTCTCCCC		up	up	71.m15289	AN6828.1	AO070314000111	Nucleolar GTPase/ATPase p130	Y		1.55271	1	2	1	0	115	29	44	No EST	No EST
652	CTCTCCTTCTCCCC		up	up	72.m19777	AN7287.1	AO070297000028	Mitochondrial tricarboxylate/dicarboxylate carrier proteins	C	1	0.00648453	2	2	3	1	146	61	77	No EST	No EST
652	CTCTCCTTCTCCCC		up	down	72.m19727	AN7350.1	AO070278000050	FOG: RRM domain				6	2	2	0	59	167	222			No EST	No EST
652	CTCTCCTTCTCCCC		up	up	57.m05909	AN7438.1	AO070229000006	Thyroid hormone receptor-associated coactivator complex component (TRAP170)	K		2.84315	1	1	2	1	36	466	248	No EST	No EST
652	CTCTCCTTCTCCCC		up	up	57.m05873	AN7471.1	AO070287000055	Predicted carbohydrate kinase, contains PfkB domain				1	1	2	0	86	37	53	No EST	No EST
652	CTCTCCTTCTCCCC		up	up	57.m05872	AN7472.1	AO070287000054	Oligosaccharyltransferase, alpha subunit (ribophorin I)	O		1.31149	1	1	2	0	59	51	52	No EST	No EST
652	CTCTCCTTCTCCCC		up	down	57.m05855	AN7474.1	AO070287000028	RNA-binding protein (contains RRM and Pumilio-like repeats)				1	1	1	0	165	146	171			No EST	No EST
652	CTCTCCTTCTCCCC		up	up	57.m05861	AN7480.1	AO070287000037	FOG: RRM domain				2	2	3	0	46	139	294	No EST	No EST
652	CTCTCCTTCTCCCC		up	up	57.m05838	AN7501.1	AO070287000012	LisH motif-containing protein	Z		6.54158	2	2	3	1	119	152	98	No EST	No EST
652	CTCTCCTTCTCCCC		up	up	72.m19589	AN7570.1	AO070343000416	Alpha tubulin	Z		6.54158	1	1	1	0	104	362	383	No EST	No EST
652	CTCTCCTTCTCCCC		up	up	72.m19615	AN7597.1	AO070343000314	Sexual differentiation process protein ISP4	T		0.0264659	1	2	1	0	193	216	314	No EST	No EST
652	CTCTCCTTCTCCCC		up	down	72.m19650	AN7609.1	AO070343000267	Mitochondrial/chloroplast DNA-directed RNA polymerase RPO41, provides primers for DNA replication-initiation	KL		2.84315481300744 1.36078872407156	2	1	1	0	221	32	221			No EST	No EST
652	CTCTCCTTCTCCCC		up	up	72.m19651	AN7610.1	AO070343000266	putative transcription factor [Emericella nidulans]				3	1	3	0	224	160	153	No EST	No EST
652	CTCTCCTTCTCCCC		up	up	71.m15723	AN7697.1	AO070325000104	Sensory transduction histidine kinase	T		0.0264659	3	1	1	0	135	10	10	No EST	No EST
652	CTCTCCTTCTCCCC		up	up	71.m15748	AN7721.1	AO070325000136	Transport protein Sec61, alpha subunit	UO		0.494755743050251 1.31149382861186	2	2	3	0	121	84	81	106	1
652	CTCTCCTTCTCCCC		up	up	71.m15792	AN7760.1	AO070286000007	Amphiphysin	U		0.494756	1	1	3	0	229	205	312	No EST	No EST
652	CTCTCCTTCTCCCC		up	up	52.m03642	AN7950.1	AO070342000340	Cellobiohydrolase A (1,4-beta-cellobiosidase A)	G		4.07088	1	1	1	0	128	323	433	79	0
652	CTCTCCTTCTCCCC		up	up	53.m03851	AN7996.1	AO070322000049	hypothetical protein ( (AL513410) hypothetical protein [Neurospora crassa] )				2	2	1	0	382	364	2	No EST	No EST
652	CTCTCCTTCTCCCC		up	up	53.m03908	AN8038.1	AO070330000008	mRNA cleavage and polyadenylation factor I complex, subunit RNA15	A		3.9185	2	1	1	0	282	253	99	No EST	No EST
652	CTCTCCTTCTCCCC		up	up	53.m03905	AN8041.1	AO070330000005	Glyceraldehyde 3-phosphate dehydrogenase	G		4.07088	2	1	3	0	133	319	55	146	0
652	CTCTCCTTCTCCCC		up	up	53.m04098	AN8053.1	AO070322000147	Inositol polyphosphate 5-phosphatase and related proteins	U		0.494756	1	1	3	0	424	91	186	No EST	No EST
652	CTCTCCTTCTCCCC		up	up	53.m03888	AN8055.1	AO070322000145	RNA-binding Ran Zn-finger protein and related proteins				2	5	3	1	48	88	266	No EST	No EST
652	CTCTCCTTCTCCCC		up	up	53.m03827	AN8117.1	AO070322000025	Fatty acyl-CoA elongase/Polyunsaturated fatty acid specific elongation enzyme	I		3.77179	2	1	4	0	214	241	246	No EST	No EST
652	CTCTCCTTCTCCCC		up	up	53.m03757	AN8216.1	AO070310000096	Nucleoside diphosphate kinase	F		2.12347	1	1	1	0	65	168	132	111	0
652	CTCTCCTTCTCCCC		up	up	53.m03738	AN8231.1	AO070310000077	S-adenosylmethionine decarboxylase	T		0.0264659	1	1	3	1	253	107	77	9	0
652	CTCTCCTTCTCCCC		up	up	53.m04128	AN8235.1	AO070310000073	predicted protein [Neurospora crassa]				1	3	2	0	309	251	75	No EST	No EST
652	CTCTCCTTCTCCCC		up	up	53.m03716	AN8251.1	AO070310000057	putative transcriptional activator [Aspergillus nidulans]				1	2	2	0	82	193	166	No EST	No EST
652	CTCTCCTTCTCCCC		up	up	53.m03692	AN8269.1	AO070310000033	Molecular chaperone (HSP90 family)	O		1.31149	1	5	2	0	109	27	178	336	1
652	CTCTCCTTCTCCCC		up	up	53.m03687	AN8273.1	AO070310000028	Ubiquinol cytochrome c reductase, subunit QCR2	C	1	0.00648453	2	1	2	0	26	122	10	120	0
652	CTCTCCTTCTCCCC		up	up	53.m03686	AN8274.1	AO070310000027	Mitochondrial tricarboxylate/dicarboxylate carrier proteins	C	1	0.00648453	3	2	1	1	241	276	263	158	0
652	CTCTCCTTCTCCCC		up	up	53.m03681	AN8280.1	AO070310000020	Long-chain acyl-CoA synthetases (AMP-forming)	I		3.77179	2	1	1	0	275	227	92	No EST	No EST
652	CTCTCCTTCTCCCC		up	down	65.m07461	AN8285.1	AO070277000003	Cdk activating kinase (CAK)/RNA polymerase II transcription initiation/nucleotide excision repair factor TFIIH/TFIIK, kinase subunit CDK7	DKL		2.88952327378684 2.84315481300744 1.36078872407156	1	1	1	0	128	109	485			No EST	No EST
652	CTCTCCTTCTCCCC		up	up	55.m03152	AN8655.1	AO070296000035	hypothetical protein [Neurospora crassa]				1	1	3	0	145	169	178	260	1
652	CTCTCCTTCTCCCC		up	up	62.m03407	AN8667.1	AO070269000068	GATA-4/5/6 transcription factors	K		2.84315	1	1	2	0	191	489	329	No EST	No EST
652	CTCTCCTTCTCCCC		up	up	62.m03394	AN8676.1	AO070315000096	Regulator of arginine metabolism and related MADS box-containing transcription factors	K		2.84315	1	3	3	1	121	234	358	157	0
652	CTCTCCTTCTCCCC		up	up	62.m03393	AN8677.1	AO070315000097	Galactosyltransferases	G		4.07088	1	2	3	0	496	47	51	No EST	No EST
652	CTCTCCTTCTCCCC		up	up	62.m03388	AN8683.1	AO070315000103	Ferric reductase, NADH/NADPH oxidase and related proteins	PQ		5.47872319697198 1.7655108524824	1	1	2	0	274	184	125	No EST	No EST
652	CTCTCCTTCTCCCC		up	up	62.m03339	AN8741.1	AO070250000041	FOG: Zn-finger				2	2	2	0	66	249	293	No EST	No EST
652	CTCTCCTTCTCCCC		up	up	62.m03324	AN8751.1	AO070250000011	NDR and related serine/threonine kinases				2	1	2	0	50	15	29	No EST	No EST
652	CTCTCCTTCTCCCC		up	up	71.m15631	AN8820.1	AO070276000022	Serine-threonine phosphatase 2B, catalytic subunit				1	1	1	0	247	111	253	338	1
652	CTCTCCTTCTCCCC		up	up	71.m15956	AN8824.1	AO070271000057	Translation initiation factor 6 (eIF-6)	J		1.42402	1	1	2	0	180	113	178	129	1
652	CTCTCCTTCTCCCC		up	up	71.m15967	AN8836.1	AO070271000042	p21-activated serine/threonine protein kinase	T		0.0264659	2	1	3	0	310	337	32	No EST	No EST
652	CTCTCCTTCTCCCC		up	up	71.m15980	AN8846.1	AO070271000030	Protein involved in beta-1,3-glucan synthesis	G		4.07088	3	2	5	0	191	129	166	355	1
652	CTCTCCTTCTCCCC		up	up	71.m15984	AN8849.1	AO070271000027	Uncharacterized conserved protein				1	1	2	0	156	159	89	No EST	No EST
652	CTCTCCTTCTCCCC		up	up	56.m02292	AN8881.1	AO070293000011	Mitochondrial carnitine-acylcarnitine carrier protein	C	1	0.00648453	1	2	3	0	62	230	152	334	1
652	CTCTCCTTCTCCCC		up	up	56.m02296	AN8884.1	AO070293000016	hypothetical protein [Neurospora crassa]				1	1	1	0	363	115	140	197	1
652	CTCTCCTTCTCCCC		up	up	66.m04541	AN9083.1	AO070332000196	Adenine phosphoribosyl transferases	F		2.12347	4	2	4	0	4	438	438	No EST	No EST
652	CTCTCCTTCTCCCC		up	down	66.m04545	AN9087.1	AO070332000190	Calcium-responsive transcription coactivator	K		2.84315	1	1	2	0	111	337	96			No EST	No EST
652	CTCTCCTTCTCCCC		up	down	66.m04605	AN9147.1	AO070332000117	von Willebrand factor and related coagulation proteins	V		10.2607	1	1	1	0	165	172	166			No EST	No EST
652	CTCTCCTTCTCCCC		up	up	66.m04586	AN9149.1	AO070332000147	Ca2+-dependent lipid-binding protein CLB1/vesicle protein vp115/Granuphilin A, contains C2 domain				3	2	2	0	81	2	312	No EST	No EST
652	CTCTCCTTCTCCCC		up	down	59.m09152	AN9446.1	AO070327000156	Pantothenate kinase PanK and related proteins	H		4.32628	1	2	1	0	305	320	286			No EST	No EST
652	CTCTCCTTCTCCCC		up	up	54.m06486	AN9448.1	AO070334000061	predicted protein [Neurospora crassa]				2	1	1	0	255	21	15	No EST	No EST
698	CCCTCCATCTCCA		up	up	71.m15347	AN0071.1	AO070314000160	Splicing coactivator SRm160/300, subunit SRm300	A		4.83156	1	1	1	0	123	359	387	No EST	No EST
698	CCCTCCATCTCCA		up	up	71.m15354	AN0076.1	AO070311000140	5'-3' exonuclease	L		3.01106	1	1	1	0	83	147	3	49	0
698	CCCTCCATCTCCA		up	up	71.m15396	AN0117.1	AO070311000104	Histone H4	B		4.53955	1	2	1	0	51	185	238	No EST	No EST
698	CCCTCCATCTCCA		up	up	54.m06397	AN0357.1	AO070318000033	Cytochrome c1	C		0.0333311	1	1	1	1	69	208	201	No EST	No EST
698	CCCTCCATCTCCA		up	up	54.m06664	AN0410.1	AO070294000082	Serine/threonine specific protein phosphatase PP1, catalytic subunit	T		0.596443	3	2	1	0	28	67	368	No EST	No EST
698	CCCTCCATCTCCA		up	down	54.m06624	AN0433.1	AO070338000284	60S ribosomal protein L18A	J		2.99911	1	1	1	0	19	19	19			No EST	No EST
698	CCCTCCATCTCCA		up	up	69.m15270	AN0575.1	AO070272000054	Calmodulin-binding protein CRAG, contains DENN domain	T		0.596443	2	3	2	0	417	51	115	117	1
698	CCCTCCATCTCCA		up	up	69.m15264	AN0585.1	AO070280000007	Actin regulatory protein (Wiskott-Aldrich syndrome protein)	TZ		0.596443066422955 6.16407457777101	1	2	1	0	555	72	127	No EST	No EST
698	CCCTCCATCTCCA		up	up	70.m15292	AN0689.1	AO070343000524	acetate regulatory DNA binding protein FacB [Emericella nidulans]				1	1	1	0	307	254	211	No EST	No EST
698	CCCTCCATCTCCA		up	up	70.m15361	AN0747.1	AO070343000435	Mitochondrial processing peptidase, beta subunit, and related enzymes (insulinase superfamily)	O		2.49182	1	1	2	0	25	177	216	29	0
698	CCCTCCATCTCCA		up	up	70.m15785	AN0775.1	AO070316000063	Glyoxylate/hydroxypyruvate reductase (D-isomer-specific 2-hydroxy acid dehydrogenase superfamily)	C		0.0333311	1	1	1	0	105	159	275	87	0
698	CCCTCCATCTCCA		up	up	70.m15426	AN0824.1	AO070255000021	Short-chain acyl-CoA dehydrogenase	I		3.2408	1	2	2	0	84	84	85	25	0
698	CCCTCCATCTCCA		up	up	70.m15437	AN0837.1	AO070255000006	Splicing coactivator SRm160/300, subunit SRm300	A		4.83156	2	1	1	0	26	127	458	No EST	No EST
698	CCCTCCATCTCCA		up	up	70.m15456	AN0870.1	AO070320000023	Mitochondrial phosphate carrier protein	C		0.0333311	2	1	1	0	63	446	373	15	0
698	CCCTCCATCTCCA		up	up	70.m15808	AN0926.1	AO070320000110	Nuclear transport receptor Karyopherin-beta2/Transportin (importin beta superfamily)	YU		1.63418710566978 1.63987537586578	1	2	2	0	89	135	177	No EST	No EST
698	CCCTCCATCTCCA		up	up	70.m15540	AN0932.1	AO070320000123	Pyridine nucleotide-disulphide oxidoreductase	Q		4.52228	1	1	2	0	321	141	243	No EST	No EST
698	CCCTCCATCTCCA		up	up	70.m15609	AN0973.1	AO070320000174	FOG: Zn-finger				3	2	2	0	161	151	148	103	0
698	CCCTCCATCTCCA		up	up	70.m15137	AN1094.1	AO070285000053	NADH-dehydrogenase (ubiquinone)	C		0.0333311	3	1	2	0	33	377	24	No EST	No EST
698	CCCTCCATCTCCA		up	up	70.m15136	AN1096.1	AO070285000048	von Willebrand factor and related coagulation proteins	V		4.37462	1	2	1	0	78	449	95	No EST	No EST
698	CCCTCCATCTCCA		up	up	70.m15118	AN1117.1	AO070331000109	Putative cargo transport protein ERV29	U		1.63988	1	1	1	0	136	256	280	192	0
698	CCCTCCATCTCCA		up	up	70.m15059	AN1162.1	AO070331000152	Elongation factor 1 beta/delta chain	K		5.01136	1	3	2	0	50	98	112	17	0
698	CCCTCCATCTCCA		up	down	70.m15038	AN1179.1	AO070331000176	Vacuolar import and degradation protein	U		1.63988	1	2	2	0	105	78	55			158	1
698	CCCTCCATCTCCA		up	up	70.m14906	AN1325.1	AO070303000088	Protein interacting with poly(A)-binding protein	A		4.83156	2	1	2	0	107	162	91	No EST	No EST
698	CCCTCCATCTCCA		up	down	70.m14875	AN1355.1	AO070237000005	Permease of the drug/metabolite transporter (DMT) superfamily				1	1	2	0	24	116	50			No EST	No EST
698	CCCTCCATCTCCA		up	up	70.m14873	AN1357.1	AO070237000003	Phosphorylcholine transferase/cholinephosphate cytidylyltransferase	I		3.2408	1	1	3	0	135	387	148	No EST	No EST
698	CCCTCCATCTCCA		up	up	70.m15731	AN1358.1	AO070237000002	Serine/threonine protein phosphatase	T		0.596443	3	2	3	0	156	290	0	400	1
698	CCCTCCATCTCCA		up	up	70.m14845	AN1378.1	AO070243000008	predicted protein [Neurospora crassa]				2	2	3	0	294	122	176	189	1
698	CCCTCCATCTCCA		up	up	55.m02990	AN1484.1	AO070334000191	Valyl-tRNA synthetase	J		2.99911	1	1	2	0	33	243	75	102	0
698	CCCTCCATCTCCA		up	down	58.m07773	AN1697.1	AO070305000021	Splicing coactivator SRm160/300, subunit SRm160 (contains PWI domain)	A		4.83156	1	1	1	0	90	15	317			No EST	No EST
698	CCCTCCATCTCCA		up	up	57.m05369	AN1800.1	AO070335000095	Signal transduction histidine kinase	T		0.596443	1	1	1	0	41	391	295	No EST	No EST
698	CCCTCCATCTCCA		up	up	58.m07667	AN1844.1	AO070292000063	palFp [Emericella nidulans]				1	1	1	0	40	233	485	No EST	No EST
698	CCCTCCATCTCCA		up	up	58.m07665	AN1846.1	AO070292000059					1	1	1	0	212	102	229	No EST	No EST
698	CCCTCCATCTCCA		up	up	57.m05742	AN1876.1	AO070341000183	Predicted membrane protein, contains two CBS domains				1	1	2	0	18	369	341	No EST	No EST
698	CCCTCCATCTCCA		up	down	58.m07346	AN1950.1	AO070342000218	conserved hypothetical protein [Neurospora crassa]				3	1	1	0	55	214	212			496	1
698	CCCTCCATCTCCA		up	up	57.m05760	AN2062.1	AO070341000205	Molecular chaperones GRP78/BiP/KAR2, HSP70 superfamily	O		2.49182	1	2	1	0	259	101	140	173	1
698	CCCTCCATCTCCA		up	up	57.m05768	AN2068.1	AO070341000217	Vigilin	I		3.2408	4	3	2	0	47	26	39	No EST	No EST
698	CCCTCCATCTCCA		up	up	72.m19691	AN2150.1	AO070343000199	Prolyl-tRNA synthetase	J		2.99911	1	1	1	0	25	45	12	66	1
698	CCCTCCATCTCCA		up	up	72.m20002	AN2154.1	AO070343000203	hypothetical protein [Neurospora crassa]				2	1	2	0	333	413	49	No EST	No EST
698	CCCTCCATCTCCA		up	up	69.m14881	AN2190.1	AO070247000014	Predicted methyltransferase				1	1	1	0	282	4	271	No EST	No EST
698	CCCTCCATCTCCA		up	up	71.m15846	AN2219.1	AO070326000185	related to ahmp1 protein [MIPS] [Neurospora crassa]				1	1	1	0	12	288	6	No EST	No EST
698	CCCTCCATCTCCA		up	up	71.m15923	AN2278.1	AO070295000054	Chromatin remodeling complex SWI/SNF, component SWI2 and related ATPases (DNA/RNA helicase superfamily)	BK		4.53955386654454 5.01135951213957	2	2	1	1	347	85	102	No EST	No EST
698	CCCTCCATCTCCA		up	up	71.m15946	AN2297.1	AO070295000078	hypothetical protein [Neurospora crassa]				1	2	1	0	52	119	449	No EST	No EST
698	CCCTCCATCTCCA		up	up	71.m15519	AN2315.1	AO070323000037	F0F1-type ATP synthase, beta subunit	C		0.0333311	2	3	2	1	57	300	507	104	0
698	CCCTCCATCTCCA		up	up	63.m00601	AN2344.1	AO070343000375	Permease of the major facilitator superfamily	G		0.138974	1	1	1	0	271	37	81	No EST	No EST
698	CCCTCCATCTCCA		up	up	69.m15223	AN2435.1	AO070264000043	ATP-citrate lyase	C		0.0333311	3	2	2	0	5	256	161	187	0
698	CCCTCCATCTCCA		up	down	54.m06687	AN2744.1	AO070338000227	predicted protein [Neurospora crassa]				1	1	1	0	110	189	158			No EST	No EST
698	CCCTCCATCTCCA		up	up	59.m08697	AN2855.1	AO070338000169	FOG: Zn-finger				3	2	2	0	88	164	166	180	1
698	CCCTCCATCTCCA		up	up	59.m08719	AN2871.1	AO070338000143	SWI-SNF chromatin-remodeling complex protein	B		4.53955	2	2	2	0	326	380	139	No EST	No EST
698	CCCTCCATCTCCA		up	up	59.m08724	AN2875.1	AO070338000136	Fructose 1,6-bisphosphate aldolase	G		0.138974	1	3	4	0	366	180	99	43	0
698	CCCTCCATCTCCA		up	up	59.m09058	AN2936.1	AO070337000172	Alpha-mannosidase	G		0.138974	2	1	1	0	133	306	279	No EST	No EST
698	CCCTCCATCTCCA		up	up	59.m09023	AN2989.1	AO070337000133	FOG: RRM domain				1	2	3	0	93	394	13	183	0
698	CCCTCCATCTCCA		up	up	59.m08957	AN3058.1	AO070337000016	Glycine/serine hydroxymethyltransferase	E		4.57318	1	2	2	0	77	394	136	66	0
698	CCCTCCATCTCCA		up	up	59.m08959	AN3059.1	AO070337000014	Phosphoglycerate mutase	G		0.138974	1	1	2	1	223	14	19	25	1
698	CCCTCCATCTCCA		up	up	59.m08662	AN3085.1	AO070334000123	Predicted phosphatase				3	1	1	0	160	488	103	166	0
698	CCCTCCATCTCCA		up	up	59.m08644	AN3100.1	AO070334000141	predicted protein [Neurospora crassa]				3	3	1	1	210	6	302	106	1
698	CCCTCCATCTCCA		up	up	59.m08628	AN3110.1	AO070303000041	3-phosphoinositide-dependent protein kinase (PDK1)	T		0.596443	2	1	2	0	45	107	157	391	1
698	CCCTCCATCTCCA		up	up	59.m08623	AN3114.1	AO070303000035	predicted protein [Neurospora crassa]				3	1	2	0	239	124	355	No EST	No EST
698	CCCTCCATCTCCA		up	up	59.m08584	AN3142.1	AO070303000002	Nucleolar GTPase/ATPase p130	Y		1.63419	1	1	1	0	320	230	211	No EST	No EST
698	CCCTCCATCTCCA		up	up	52.m03702	AN3308.1	AO070330000181	Alpha-amylase	G		0.138974	2	1	1	0	215	284	140	No EST	No EST
698	CCCTCCATCTCCA		up	up	66.m04646	AN3376.1	AO070281000020	Squalene synthetase	I		3.2408	2	1	3	0	15	70	100	298	1
698	CCCTCCATCTCCA		up	up	58.m07379	AN3581.1	AO070342000168	Thioredoxin reductase	O		2.49182	3	1	1	1	62	111	142	163	1
698	CCCTCCATCTCCA		up	up	58.m07398	AN3600.1	AO070342000153	hypothetical protein [Neurospora crassa]				1	2	1	0	282	96	228	276	1
698	CCCTCCATCTCCA		up	up	69.m15419	AN3712.1	AO070341000341	Predicted hydrolase related to dienelactone hydrolase				2	1	1	0	164	306	366	68	0
698	CCCTCCATCTCCA		up	up	57.m05667	AN3815.1	AO070311000013	Dystonin, GAS (Growth-arrest-specific protein), and related proteins	Z		6.16407	3	2	2	0	282	11	13	No EST	No EST
698	CCCTCCATCTCCA		up	down	54.m06570	AN4042.1	AO070328000135	Cytochrome P450 CYP4/CYP19/CYP26 subfamilies	QI		4.52227748369821 3.24079585970098	1	1	2	0	48	87	18			410	1
698	CCCTCCATCTCCA		up	up	54.m06800	AN4218.1	AO070315000081	Translation elongation factor EF-1 alpha/Tu	J		2.99911	6	5	4	1	116	170	226	96	0
698	CCCTCCATCTCCA		up	up	54.m06782	AN4234.1	AO070234000012	Phosphoglucomutase/phosphomannomutase	G		0.138974	1	1	1	0	221	184	121	77	0
698	CCCTCCATCTCCA		up	up	65.m07433	AN4259.1	AO070277000032	Uncharacterized conserved protein, contains PCI domain				3	1	1	0	13	160	140	10	0
698	CCCTCCATCTCCA		up	up	58.m08998	AN4378.1	AO070261000021	Fucose permease	G		0.138974	2	1	1	0	297	368	161	No EST	No EST
698	CCCTCCATCTCCA		up	up	58.m07927	AN4394.1	AO070261000039					2	2	1	0	29	48	31	No EST	No EST
698	CCCTCCATCTCCA		up	up	58.m08982	AN4411.1	AO070273000031	hypothetical protein ( (AL513462) related to Sts1 protein [Neurospora crassa] )				2	5	1	0	20	98	91	No EST	No EST
698	CCCTCCATCTCCA		up	up	58.m07882	AN4443.1	AO070273000010	Methionine synthase II (cobalamin-independent)	E		4.57318	4	1	4	0	28	226	235	66	0
698	CCCTCCATCTCCA		up	up	58.m07847	AN4462.1	AO070305000113	Pyruvate carboxylase	C		0.0333311	2	3	3	0	122	35	19	No EST	No EST
698	CCCTCCATCTCCA		up	up	57.m05648	AN4483.1	AO070311000032	Ca2+/calmodulin-dependent protein kinase, EF-Hand protein superfamily	T		0.596443	3	2	1	0	46	382	469	No EST	No EST
698	CCCTCCATCTCCA		up	down	57.m05642	AN4489.1	AO070304000089	putative transcriptional activator protein [Schizosaccharomyces pombe]				1	1	0	0	38	67	113			No EST	No EST
698	CCCTCCATCTCCA		up	down	57.m05543	AN4632.1	AO070340000375	FOG: FHA domain	T		0.596443	1	1	1	0	315	248	219			No EST	No EST
698	CCCTCCATCTCCA		up	up	71.m15674	AN4691.1	AO070284000047	Dehydrogenases with different specificities (related to short-chain alcohol dehydrogenases)	IQ		3.24079585970098 4.52227748369821	1	1	2	0	281	155	19	No EST	No EST
698	CCCTCCATCTCCA		up	up	59.m09466	AN4859.1	AO070329000143	Plasma membrane H+-transporting ATPase	P		6.3167	2	2	2	1	110	260	344	103	0
698	CCCTCCATCTCCA		up	up	59.m08876	AN4973.1	AO070288000039	predicted protein [Neurospora crassa]				2	1	2	0	40	220	208	No EST	No EST
698	CCCTCCATCTCCA		up	up	59.m09404	AN4978.1	AO070288000045	Alternative splicing factor SRp55/B52/SRp75 (RRM superfamily)	A		4.83156	1	1	1	0	342	59	79	329	1
698	CCCTCCATCTCCA		up	up	59.m08894	AN4991.1	AO070288000071	aureobasidin-resistance protein; AurA [Aspergillus nidulans]				2	1	3	0	52	111	48	420	1
698	CCCTCCATCTCCA		up	up	59.m08680	AN5026.1	AO070338000185	PHD finger protein AF10				1	2	3	0	390	214	37	No EST	No EST
698	CCCTCCATCTCCA		up	up	54.m06902	AN5122.1	AO070291000057	Adenylate kinase	F		7.05719	2	2	2	0	78	191	91	No EST	No EST
698	CCCTCCATCTCCA		up	up	69.m14907	AN5210.1	AO070337000270	Pyruvate kinase	G		0.138974	2	1	2	0	69	428	404	60	0
698	CCCTCCATCTCCA		up	up	69.m15489	AN5445.1	AO070333000112					2	2	1	0	280	275	163	No EST	No EST
698	CCCTCCATCTCCA		up	up	69.m15483	AN5449.1	AO070239000028	Arylsulfatase A and related enzymes	P		6.3167	5	2	1	0	26	228	236	No EST	No EST
698	CCCTCCATCTCCA		up	up	58.m07480	AN5534.1	AO070328000057	Glyoxylate/hydroxypyruvate reductase (D-isomer-specific 2-hydroxy acid dehydrogenase superfamily)	C		0.0333311	1	2	2	0	261	179	127	No EST	No EST
698	CCCTCCATCTCCA		up	up	65.m07414	AN5688.1	AO070309000104	Cyclopropane fatty acid synthase and related methyltransferases	M		9.07042	1	1	1	0	36	267	336	No EST	No EST
698	CCCTCCATCTCCA		up	down	65.m07417	AN5693.1	AO070309000108	Uncharacterized conserved protein				1	1	1	0	196	332	19			319	0
698	CCCTCCATCTCCA		up	up	54.m06846	AN5726.1	AO070324000125	FOG: Zn-finger				2	2	1	0	159	41	85	No EST	No EST
698	CCCTCCATCTCCA		up	up	72.m18960	AN5832.1	AO070260000013	Ras-related GTPase				2	3	2	0	83	29	379	No EST	No EST
698	CCCTCCATCTCCA		up	down	72.m18960	AN5832.1	AO070260000013	Ras-related GTPase				1	2	3	0	357	71	29			28	0
698	CCCTCCATCTCCA		up	up	72.m19247	AN5884.1	AO070245000024	Uridine 5'- monophosphate synthase/orotate phosphoribosyltransferase	F		7.05719	1	1	1	0	161	116	142	No EST	No EST
698	CCCTCCATCTCCA		up	up	72.m19245	AN5885.1	AO070245000022	Glycogen synthase	G		0.138974	1	1	2	0	111	59	3	No EST	No EST
698	CCCTCCATCTCCA		up	up	72.m19244	AN5886.1	AO070245000021	3-isopropylmalate dehydratase (aconitase superfamily)	E		4.57318	1	1	1	0	188	338	290	No EST	No EST
698	CCCTCCATCTCCA		up	up	72.m19237	AN5893.1	AO070245000013	G protein signaling regulators	T		0.596443	2	3	2	0	26	31	36	No EST	No EST
698	CCCTCCATCTCCA		up	up	72.m19952	AN5931.1	AO070340000344	ATP-dependent RNA helicase	A		4.83156	1	2	2	0	160	72	68	111	1
698	CCCTCCATCTCCA		up	up	72.m19192	AN5975.1	AO070340000331	Mannitol-1-phosphate/altronate dehydrogenases	G		0.138974	2	1	1	0	279	356	206	114	0
698	CCCTCCATCTCCA		up	up	72.m19109	AN6050.1	AO070340000215					2	1	1	0	465	50	177	No EST	No EST
698	CCCTCCATCTCCA		up	up	72.m19094	AN6059.1	AO070340000190	HVA22/DP1 gene product-related proteins	V		4.37462	1	1	2	0	355	205	99	No EST	No EST
698	CCCTCCATCTCCA		up	up	72.m19080	AN6089.1	AO070340000143	Mitochondrial chaperonin, Cpn60/Hsp60p	O		2.49182	1	1	2	0	115	304	170	140	0
698	CCCTCCATCTCCA		up	down	72.m19085	AN6091.1	AO070340000149	predicted protein [Neurospora crassa]				2	1	2	0	177	94	352			74	0
698	CCCTCCATCTCCA		up	up	72.m19295	AN6195.1	AO070308000098	FOG: Zn-finger				2	1	2	0	446	84	45	386	1
698	CCCTCCATCTCCA		up	up	72.m19978	AN6231.1	AO070304000084	Tryptophan synthase beta chain	E		4.57318	3	1	2	0	100	420	122	81	0
698	CCCTCCATCTCCA		up	up	72.m19422	AN6232.1	AO070304000085	Vacuolar H+-ATPase V1 sector, subunit B	C		0.0333311	1	1	1	0	54	175	233	No EST	No EST
698	CCCTCCATCTCCA		up	down	72.m19414	AN6243.1	AO070304000097	MAPK related serine/threonine protein kinase	T		0.596443	1	1	1	0	27	165	213			No EST	No EST
698	CCCTCCATCTCCA		up	up	72.m19981	AN6254.1	AO070304000034	Mitochondrial oxoglutarate/malate carrier proteins	C		0.0333311	1	1	1	0	40	106	188	No EST	No EST
698	CCCTCCATCTCCA		up	up	72.m19368	AN6271.1	AO070304000013	predicted protein [Neurospora crassa]				1	2	1	0	156	212	117	No EST	No EST
698	CCCTCCATCTCCA		up	up	72.m19363	AN6277.1	AO070304000003	Synaptic vesicle transporter SVOP and related transporters (major facilitator superfamily)				1	2	2	0	184	123	215	No EST	No EST
698	CCCTCCATCTCCA		up	up	62.m03095	AN6508.1	AO070270000001	Glycogen synthase kinase-3	G		0.138974	1	3	2	1	145	38	154	36	0
698	CCCTCCATCTCCA		up	down	62.m03095	AN6508.1	AO070270000001	Glycogen synthase kinase-3	G		0.138974	1	1	2	0	404	323	377			45	0
698	CCCTCCATCTCCA		up	up	62.m03114	AN6525.1	AO070270000024	Glyoxylate/hydroxypyruvate reductase (D-isomer-specific 2-hydroxy acid dehydrogenase superfamily)	C		0.0333311	2	3	1	0	143	54	43	No EST	No EST
698	CCCTCCATCTCCA		up	up	62.m03135	AN6538.1	AO070270000046	LRR-containing protein				2	1	2	0	298	182	132	No EST	No EST
698	CCCTCCATCTCCA		up	up	62.m03177	AN6588.1	AO070326000036					2	2	4	0	433	74	35	414	1
698	CCCTCCATCTCCA		up	up	62.m03214	AN6618.1	AO070326000068	Ypt/Rab-specific GTPase-activating protein GYP7 and related proteins	T		0.596443	1	1	1	0	329	128	112	No EST	No EST
698	CCCTCCATCTCCA		up	up	62.m03234	AN6639.1	AO070326000091	Uncharacterized protein involved in propionate catabolism				3	1	2	0	11	275	253	21	0
698	CCCTCCATCTCCA		up	up	65.m07276	AN6703.1	AO070339000139	Permeases of the major facilitator superfamily	GEP		0.138974198029415 4.57317855211283 6.31669793202208	1	1	1	0	308	350	317	No EST	No EST
698	CCCTCCATCTCCA		up	up	65.m07257	AN6717.1	AO070339000157	NAD-dependent malate dehydrogenase	C		0.0333311	2	1	1	0	89	171	140	No EST	No EST
698	CCCTCCATCTCCA		up	up	71.m15289	AN6828.1	AO070314000111	Nucleolar GTPase/ATPase p130	Y		1.63419	1	1	1	0	359	256	41	No EST	No EST
698	CCCTCCATCTCCA		up	up	52.m03964	AN6941.1	AO070335000169					1	1	3	0	182	303	230	No EST	No EST
698	CCCTCCATCTCCA		up	up	57.m05873	AN7471.1	AO070287000055	Predicted carbohydrate kinase, contains PfkB domain				1	1	1	0	82	43	86	No EST	No EST
698	CCCTCCATCTCCA		up	up	57.m05872	AN7472.1	AO070287000054	Oligosaccharyltransferase, alpha subunit (ribophorin I)	O		2.49182	1	2	1	0	102	44	50	No EST	No EST
698	CCCTCCATCTCCA		up	up	57.m05408	AN7650.1	AO070268000006	Rho GTPase-activating protein	TZ		0.596443066422955 6.16407457777101	2	1	1	0	362	163	51	No EST	No EST
698	CCCTCCATCTCCA		up	up	57.m05936	AN7660.1	AO070268000029	Bifunctional GTP cyclohydrolase II/3,4-dihydroxy-2butanone-4-phosphate synthase	H		7.52388	1	1	2	0	79	198	319	No EST	No EST
698	CCCTCCATCTCCA		up	down	71.m15729	AN7700.1	AO070325000106	FOG: RRM domain				1	1	1	0	470	204	305			No EST	No EST
698	CCCTCCATCTCCA		up	up	53.m03738	AN8231.1	AO070310000077	S-adenosylmethionine decarboxylase	T		0.596443	1	2	1	1	259	105	212	9	0
698	CCCTCCATCTCCA		up	up	53.m03736	AN8233.1	AO070310000075	Phosphatidylinositol transfer protein SEC14 and related proteins	I		3.2408	1	1	2	0	82	256	217	117	0
698	CCCTCCATCTCCA		up	up	53.m03681	AN8280.1	AO070310000020	Long-chain acyl-CoA synthetases (AMP-forming)	I		3.2408	1	1	1	0	84	245	135	No EST	No EST
698	CCCTCCATCTCCA		up	up	62.m03407	AN8667.1	AO070269000068	GATA-4/5/6 transcription factors	K		5.01136	1	2	1	0	194	128	341	No EST	No EST
698	CCCTCCATCTCCA		up	up	62.m03394	AN8676.1	AO070315000096	Regulator of arginine metabolism and related MADS box-containing transcription factors	K		5.01136	1	2	1	1	119	300	432	157	0
698	CCCTCCATCTCCA		up	up	62.m03393	AN8677.1	AO070315000097	Galactosyltransferases	G		0.138974	3	2	1	0	428	18	45	No EST	No EST
698	CCCTCCATCTCCA		up	up	62.m03343	AN8723.1	AO070315000151	predicted protein [Neurospora crassa]				2	2	2	0	128	158	142	123	0
698	CCCTCCATCTCCA		up	up	62.m03324	AN8751.1	AO070250000011	NDR and related serine/threonine kinases				4	2	3	0	53	7	29	No EST	No EST
698	CCCTCCATCTCCA		up	down	71.m15583	AN8787.1	AO070276000074	Nuclear mRNA export factor receptor LOS1/Exportin-t (importin beta superfamily)	YUJ		1.63418710566978 1.63987537586578 2.99910605205111	1	1	1	0	87	135	328			356	1
698	CCCTCCATCTCCA		up	up	71.m15996	AN8858.1	AO070271000015	Transcription factor of the Forkhead/HNF3 family	K		5.01136	1	1	1	0	503	14	175	No EST	No EST
698	CCCTCCATCTCCA		up	up	56.m02292	AN8881.1	AO070293000011	Mitochondrial carnitine-acylcarnitine carrier protein	C		0.0333311	2	2	2	1	75	229	152	334	1
698	CCCTCCATCTCCA		up	up	54.m06486	AN9448.1	AO070334000061	predicted protein [Neurospora crassa]				1	1	2	0	536	29	19	No EST	No EST
751	ACCGCCTTCC		up	up	54.m06468	AN0275.1	AO070334000082	Cystine transporter Cystinosin	E		2.07749	1	1	1	0	185	80	105	No EST	No EST
751	ACCGCCTTCC		up	up	54.m06464	AN0298.1	AO070334000044	Polyadenylation factor I complex, subunit, Yth1 (CPSF subunit)	A		0.0132378	1	1	1	0	283	343	173	No EST	No EST
751	ACCGCCTTCC		up	up	70.m15804	AN0834.1	AO070255000011	Molecular chaperone (DnaJ superfamily)	O		0.15293	1	1	1	1	283	204	254	No EST	No EST
751	ACCGCCTTCC		up	up	70.m15196	AN1038.1	AO070336000073	Putative transmembrane protein				1	1	1	0	153	126	163	No EST	No EST
751	ACCGCCTTCC		up	up	70.m15175	AN1059.1	AO070218000002	Carnitine O-acyltransferase CPT2/YAT1	I		3.37599	1	1	1	1	89	386	437	No EST	No EST
751	ACCGCCTTCC		up	down	70.m14988	AN1231.1	AO070331000243	DNA polymerase IV (family X)	L		4.3847	2	1	1	1	64	303	376			No EST	No EST
751	ACCGCCTTCC		up	up	70.m14844	AN1379.1	AO070243000010	mRNA export protein (contains WD40 repeats)	A		0.0132378	1	1	1	0	298	84	142	135	1
751	ACCGCCTTCC		up	up	58.m07724	AN1638.1	AO070299000044	Puromycin-sensitive aminopeptidase and related aminopeptidases	EO		2.07748989269454 0.152930127007461	1	1	1	0	209	148	125	No EST	No EST
751	ACCGCCTTCC		up	up	72.m19694	AN2147.1	AO070343000196	rRNA processing protein Rrp5	A		0.0132378	1	1	2	0	140	68	10	No EST	No EST
751	ACCGCCTTCC		up	up	59.m09396	AN2911.1	AO070338000094	Transcriptional activator FOSB/c-Fos and related bZIP transcription factors	K		1.62377	1	1	1	1	441	38	43	No EST	No EST
751	ACCGCCTTCC		up	up	59.m09061	AN2933.1	AO070337000174	Phosphatidylserine-specific receptor PtdSerR, contains JmjC domain	BT		2.3361163957962 0.239446389529943	1	1	1	0	279	88	101	No EST	No EST
751	ACCGCCTTCC		up	up	69.m15728	AN3726.1	AO070342000289	RAN guanine nucleotide release factor	T		0.239446	2	1	1	0	13	262	319	233	0
751	ACCGCCTTCC		up	up	65.m07368	AN3756.1	AO070309000050	20S proteasome, regulatory subunit beta type PSMB6/PSMB9/PRE3	O		0.15293	1	1	1	1	217	29	32	No EST	No EST
751	ACCGCCTTCC		up	up	54.m06583	AN4007.1	AO070328000146	Succinyl-CoA:alpha-ketoacid-CoA transferase	C		1.80142	1	1	1	1	337	180	192	No EST	No EST
751	ACCGCCTTCC		up	up	54.m06790	AN4226.1	AO070234000023	Sof1-like rRNA processing protein (contains WD40 repeats)	A		0.0132378	1	1	1	0	69	61	21	55	0
751	ACCGCCTTCC		up	up	58.m07981	AN4346.1	AO070240000018	Nucleolar RNA-binding protein NIFK				1	1	1	1	22	16	46	24	1
751	ACCGCCTTCC		up	up	58.m07904	AN4415.1	AO070273000036	Holocytochrome c synthase/heme-lyase	CO		1.80141857718525 0.152930127007461	1	1	2	0	133	39	105	No EST	No EST
751	ACCGCCTTCC		up	up	59.m09126	AN4850.1	AO070327000106	RNA-binding protein RBM5 and related proteins, contain G-patch and RRM domains				1	1	1	0	84	222	38	No EST	No EST
751	ACCGCCTTCC		up	up	59.m08858	AN4953.1	AO070288000006	Ras-related small GTPase, Rho type				2	1	1	1	96	131	157	345	1
751	ACCGCCTTCC		up	down	72.m19268	AN5866.1	AO070308000130	Arylalkylamine N-acetyltransferase				1	1	1	1	55	70	82			No EST	No EST
751	ACCGCCTTCC		up	up	72.m19409	AN6251.1	AO070304000036	Diadenosine and diphosphoinositol polyphosphate phosphohydrolase	T		0.239446	1	1	1	0	322	204	224	No EST	No EST
751	ACCGCCTTCC		up	up	72.m19497	AN6363.1	AO070279000049	Serine/threonine protein kinase involved in cell cycle control	TD		0.239446389529943 2.99677563026662	1	1	1	1	126	22	36	No EST	No EST
751	ACCGCCTTCC		up	up	65.m07285	AN6698.1	AO070339000130	Uncharacterized conserved protein				1	1	1	0	79	378	282	32	0
751	ACCGCCTTCC		up	up	57.m05423	AN7659.1	AO070268000028	ATP-dependent RNA helicase	A		0.0132378	1	1	1	1	376	23	22	172	1
751	ACCGCCTTCC		up	up	53.m03900	AN8044.1	AO070292000105	N-arginine dibasic convertase NRD1 and related Zn2+-dependent endopeptidases, insulinase superfamily	O		0.15293	2	1	1	0	345	365	103	No EST	No EST
751	ACCGCCTTCC		up	up	53.m03925	AN8072.1	AO070330000030	hypothetical protein B13N20.140 [imported] - Neurospora crassa				1	1	1	0	76	25	24	No EST	No EST
751	ACCGCCTTCC		up	up	62.m03394	AN8676.1	AO070315000096	Regulator of arginine metabolism and related MADS box-containing transcription factors	K		1.62377	1	1	1	1	236	237	312	157	0
813	ACGTCAC	yATF-B (KWCGTCA) [yeast_motifs_all];	up	up	70.m15166	AN1066.1	AO070218000011	hypothetical protein [Aspergillus fumigatus]				1	1	1	0	214	66	120	121	1
813	ACGTCAC	yATF-B (KWCGTCA) [yeast_motifs_all];	up	up	70.m14867	AN1362.1	AO070243000002	hypothetical protein [Neurospora crassa]				1	1	1	1	224	22	19	93	1
813	ACGTCAC	yATF-B (KWCGTCA) [yeast_motifs_all];	up	up	58.m07780	AN1713.1	AO070305000029	Predicted esterase of the alpha-beta hydrolase superfamily				1	1	1	0	303	45	24	No EST	No EST
813	ACGTCAC	yATF-B (KWCGTCA) [yeast_motifs_all];	up	down	71.m15826	AN2237.1	AO070326000136	Carboxypeptidase C (cathepsin A)	E		2.84491	1	1	1	1	263	359	382			58	0
813	ACGTCAC	yATF-B (KWCGTCA) [yeast_motifs_all];	up	up	67.m02931	AN3223.1	AO070330000073	Pyrophosphate-dependent phosphofructo-1-kinase	G		1.66194	3	1	1	1	171	285	290	No EST	No EST
813	ACGTCAC	yATF-B (KWCGTCA) [yeast_motifs_all];	up	up	58.m09011	AN4299.1	AO070207000001	conserved hypothetical protein [Neurospora crassa]				1	1	1	0	154	224	302	52	0
813	ACGTCAC	yATF-B (KWCGTCA) [yeast_motifs_all];	up	up	59.m09399	AN4914.1	AO070338000033	Acetate kinase	C		1.51688	1	1	1	0	1	85	155	No EST	No EST
813	ACGTCAC	yATF-B (KWCGTCA) [yeast_motifs_all];	up	up	59.m08869	AN4966.1	AO070288000031	Uncharacterized conserved protein				1	1	1	0	87	237	244	No EST	No EST
813	ACGTCAC	yATF-B (KWCGTCA) [yeast_motifs_all];	up	up	72.m19071	AN6079.1	AO070340000129	Predicted RNA-binding protein				1	1	1	1	95	149	168	No EST	No EST
813	ACGTCAC	yATF-B (KWCGTCA) [yeast_motifs_all];	up	up	62.m03178	AN6589.1	AO070326000037	Glycosylphosphatidylinositol anchor synthesis protein	T		1.6477	1	1	1	1	478	26	23	No EST	No EST
813	ACGTCAC	yATF-B (KWCGTCA) [yeast_motifs_all];	up	up	53.m03745	AN8228.1	AO070310000083	Predicted ATPase, nucleotide-binding	D		1.0201	1	1	1	1	206	175	81	No EST	No EST
813	ACGTCAC	yATF-B (KWCGTCA) [yeast_motifs_all];	up	up	62.m03470	AN8698.1	AO070315000125	Actin-related protein Arp2/3 complex, subunit ARPC4	Z		0.932017	1	1	1	0	21	170	167	52	0
843	TGAGCCTCGG		up	up	71.m15403	AN0122.1	AO070311000090	ATP-dependent Lon protease, bacterial type	O		2.65175	1	1	1	1	219	89	58	78	0
843	TGAGCCTCGG		up	up	54.m06472	AN0271.1	AO070334000077	dUTPase	F		0.947982	1	1	1	0	116	21	19	42	1
843	TGAGCCTCGG		up	up	54.m06470	AN0273.1	AO070334000079	FOG: Zn-finger				1	1	1	0	337	169	390	No EST	No EST
843	TGAGCCTCGG		up	up	70.m15321	AN0732.1	AO070343000493	Synaptic vesicle transporter SVOP and related transporters (major facilitator superfamily)				1	1	1	0	476	81	59	No EST	No EST
843	TGAGCCTCGG		up	up	70.m14974	AN1246.1	AO070223000009	3-phosphoglycerate kinase	G		2.47761	1	1	1	1	326	62	169	12	0
843	TGAGCCTCGG		up	up	55.m03268	AN1524.1	AO070334000242	Methylenetetrahydrofolate dehydrogenase/methylenetetrahydrofolate cyclohydrolase	H		1.24069	1	1	1	0	220	281	19	No EST	No EST
843	TGAGCCTCGG		up	up	55.m03061	AN1543.1	AO070339000311	Fumarate reductase, flavoprotein subunit	C		0.611947	1	1	1	1	188	203	117	43	0
843	TGAGCCTCGG		up	up	71.m15945	AN2296.1	AO070295000077	RFX family transcription factor	K		2.18988	1	1	1	0	16	93	51	No EST	No EST
843	TGAGCCTCGG		up	up	59.m08450	AN2529.1	AO070300000122	Enoyl-CoA isomerase	I		0.624056	1	1	1	1	284	174	157	No EST	No EST
843	TGAGCCTCGG		up	up	72.m18955	AN5828.1	AO070260000018	Cytochrome b5	C		0.611947	1	1	1	0	196	64	59	No EST	No EST
843	TGAGCCTCGG		up	up	72.m19960	AN5916.1	AO070340000370	Enoyl-CoA hydratase/carnithine racemase	I		0.624056	1	1	1	0	195	50	63	14	0
843	TGAGCCTCGG		up	up	62.m03428	AN6555.1	AO070270000059	Alpha/beta hydrolase				1	1	1	0	48	84	335	No EST	No EST
843	TGAGCCTCGG		up	down	62.m03225	AN6629.1	AO070326000081	60S ribosomal protein L14	J		3.79027	1	1	1	1	9	8	13			122	1
843	TGAGCCTCGG		up	up	72.m19794	AN7256.1	AO070297000012	25D9-5p [Aspergillus fumigatus]				1	1	1	1	128	142	194	No EST	No EST
855	TTCCGCCCGC	TEA1 a (CGGNCGG) [yeast_motifs_all];	up	up	70.m15019	AN1200.1	AO070331000206	CAATT-binding transcription factor/60S ribosomal subunit biogenesis protein	JK		0.698254065528167 2.40236233920571	3	1	2	1	71	110	64	No EST	No EST
855	TTCCGCCCGC	TEA1 a (CGGNCGG) [yeast_motifs_all];	up	up	59.m09033	AN2981.1	AO070337000141	Glucose-6-phosphate 1-dehydrogenase	G		2.75356	1	1	1	1	143	499	116	121	0
855	TTCCGCCCGC	TEA1 a (CGGNCGG) [yeast_motifs_all];	up	up	69.m14970	AN3955.1	AO070341000068	Uncharacterized conserved protein				1	1	1	0	5	77	5	442	1
855	TTCCGCCCGC	TEA1 a (CGGNCGG) [yeast_motifs_all];	up	up	58.m07362	AN4163.1	AO070342000193	G protein beta subunit-like protein	T		2.73264	1	1	1	1	42	136	312	77	0
855	TTCCGCCCGC	TEA1 a (CGGNCGG) [yeast_motifs_all];	up	up	69.m14951	AN4169.1	AO070341000094	hypothetical protein [Neurospora crassa]				1	1	1	0	124	79	331	No EST	No EST
855	TTCCGCCCGC	TEA1 a (CGGNCGG) [yeast_motifs_all];	up	up	57.m05642	AN4489.1	AO070304000089	putative transcriptional activator protein [Schizosaccharomyces pombe]				1	1	1	0	352	245	84	No EST	No EST
855	TTCCGCCCGC	TEA1 a (CGGNCGG) [yeast_motifs_all];	up	up	69.m15461	AN5491.1	AO070341000394	Cytoplasm to vacuole targeting protein	U		2.61574	2	1	1	0	1	67	117	No EST	No EST
855	TTCCGCCCGC	TEA1 a (CGGNCGG) [yeast_motifs_all];	up	down	72.m18960	AN5832.1	AO070260000013	Ras-related GTPase				1	3	1	0	322	47	472			28	0
855	TTCCGCCCGC	TEA1 a (CGGNCGG) [yeast_motifs_all];	up	up	57.m05846	AN7496.1	AO070287000019	FOG: Immunoglobin and related proteins	P		1.93953	1	1	1	1	243	229	225	No EST	No EST
855	TTCCGCCCGC	TEA1 a (CGGNCGG) [yeast_motifs_all];	up	up	53.m03750	AN8224.1	AO070310000088	Glutamyl-tRNA synthetase	J		0.698254	1	1	2	1	15	37	17	34	0
855	TTCCGCCCGC	TEA1 a (CGGNCGG) [yeast_motifs_all];	up	up	53.m03716	AN8251.1	AO070310000057	putative transcriptional activator [Aspergillus nidulans]				1	3	1	1	148	155	358	No EST	No EST
855	TTCCGCCCGC	TEA1 a (CGGNCGG) [yeast_motifs_all];	up	up	53.m03687	AN8273.1	AO070310000028	Ubiquinol cytochrome c reductase, subunit QCR2	C		2.5353	2	1	1	1	44	9	29	120	1
855	TTCCGCCCGC	TEA1 a (CGGNCGG) [yeast_motifs_all];	up	up	62.m03474	AN8691.1	AO070315000112	Ribonucleases P/MRP protein subunit	A		2.30799	1	1	1	0	142	76	90	No EST	No EST
896	TGGTCCGTGC		up	up	70.m15466	AN0862.1	AO070320000011	Molecular chaperone Prefoldin, subunit 4	O		1.05284	1	1	2	1	116	249	115	No EST	No EST
896	TGGTCCGTGC		up	up	70.m15576	AN0944.1	AO070320000139	ATP-dependent RNA helicase	A		0.452796	1	1	1	0	142	199	154	No EST	No EST
896	TGGTCCGTGC		up	up	70.m15243	AN1024.1	AO070343000587	Chromatin remodeling complex WSTF-ISWI, small subunit	K		1.94387	1	1	1	1	291	16	18	No EST	No EST
896	TGGTCCGTGC		up	up	58.m07732	AN1666.1	AO070299000048	Nucleolar GTPase				1	1	1	1	175	12	12	122	1
896	TGGTCCGTGC		up	down	54.m06739	AN4096.1	AO070342000097	hypothetical protein [Neurospora crassa]				1	1	1	1	354	192	218			No EST	No EST
896	TGGTCCGTGC		up	down	57.m05487	AN4565.1	AO070250000008	Unnamed protein				1	1	1	1	107	125	110			No EST	No EST
896	TGGTCCGTGC		up	up	59.m08665	AN5014.1	AO070334000120	60S ribosomal protein L22	J		0.0165781	1	1	1	1	273	145	147	70	0
896	TGGTCCGTGC		up	up	69.m14840	AN5742.1	AO070193000003	Fucose permease	G		2.17087	1	1	1	0	243	317	442	No EST	No EST
896	TGGTCCGTGC		up	up	72.m20019	AN7291.1	AO070297000031	Translation initiation factor 5B (eIF-5B)	J		0.0165781	1	1	1	0	208	8	8	No EST	No EST
896	TGGTCCGTGC		up	up	57.m05836	AN7503.1	AO070287000009	Uncharacterized conserved protein				1	1	1	0	190	5	15	99	1
896	TGGTCCGTGC		up	up	57.m05457	AN7680.1	AO070325000070	Myosin class II heavy chain	Z		1.33664	1	1	1	0	112	288	172	No EST	No EST
896	TGGTCCGTGC		up	up	53.m03917	AN8066.1	AO070330000022	tRNA(1-methyladenosine) methyltransferase, subunit GCD10	J		0.0165781	1	1	1	1	145	303	292	No EST	No EST
896	TGGTCCGTGC		up	up	53.m03929	AN8076.1	AO070330000034	Splicing coactivator SRm160/300, subunit SRm300	A		0.452796	1	1	1	1	244	261	293	824	1
896	TGGTCCGTGC		up	up	52.m03716	AN8104.1	AO070338000145	hypothetical protein [Neurospora crassa]				1	1	1	0	248	27	26	No EST	No EST
896	TGGTCCGTGC		up	up	53.m03708	AN8253.1	AO070310000052	Predicted RNA-binding protein Nob1p involved in 26S proteasome assembly	O		1.05284	1	1	1	0	123	309	305	83	0
896	TGGTCCGTGC		up	up	52.m04033	AN9406.1	AO070274000011	tRNA methyltransferase	J		0.0165781	1	1	1	0	110	45	67	No EST	No EST
973	CACCGCCT		up	up	71.m15368	AN0093.1	AO070311000122	Nucleolar GTPase/ATPase p130	Y		0.416033	1	0	1	0	220	0	2	No EST	No EST
973	CACCGCCT		up	up	71.m15417	AN0133.1	AO070321000120	mRNA splicing factor ATP-dependent RNA helicase	A	1	0.00018461	1	2	1	0	182	100	93	No EST	No EST
973	CACCGCCT		up	up	54.m06468	AN0275.1	AO070334000082	Cystine transporter Cystinosin	E		4.3937	1	1	1	0	188	79	104	No EST	No EST
973	CACCGCCT		up	up	54.m06464	AN0298.1	AO070334000044	Polyadenylation factor I complex, subunit, Yth1 (CPSF subunit)	A	1	0.00018461	1	2	1	0	286	272	172	No EST	No EST
973	CACCGCCT		up	up	54.m06619	AN0430.1	AO070338000280	hypothetical protein [Neurospora crassa]				1	1	1	0	350	218	183	No EST	No EST
973	CACCGCCT		up	up	69.m15269	AN0576.1	AO070272000056	Protein kinase containing WD40 repeats	T		1.94023	1	1	1	0	222	149	174	No EST	No EST
973	CACCGCCT		up	up	69.m15690	AN0579.1	AO070280000001	Isopentenyl pyrophosphate:dimethylallyl pyrophosphate isomerase	Q		5.00025	1	1	1	1	176	268	288	51	0
973	CACCGCCT		up	up	69.m15266	AN0582.1	AO070280000004	Single-stranded DNA-binding replication protein A (RPA), medium (30 kD) subunit	L		5.66424	1	1	1	1	64	55	106	No EST	No EST
973	CACCGCCT		up	up	69.m15260	AN0589.1	AO070280000011	RNA Helicase	A	1	0.00018461	1	1	1	0	90	71	62	16	0
973	CACCGCCT		up	up	70.m15804	AN0834.1	AO070255000011	Molecular chaperone (DnaJ superfamily)	O		0.126123	1	1	1	0	282	207	257	No EST	No EST
973	CACCGCCT		up	up	70.m15629	AN0988.1	AO070318000150	LAMMER dual specificity kinases	T		1.94023	1	1	1	1	311	189	132	No EST	No EST
973	CACCGCCT		up	up	70.m15237	AN1019.1	AO070343000596	Cullins	D		5.96642	1	1	1	1	494	43	1	69	1
973	CACCGCCT		up	up	70.m15196	AN1038.1	AO070336000073	Putative transmembrane protein				1	1	1	0	156	129	166	No EST	No EST
973	CACCGCCT		up	up	70.m15203	AN1047.1	AO070313000109	Molecular chaperones HSP105/HSP110/SSE1, HSP70 superfamily	O		0.126123	2	2	3	0	234	6	6	No EST	No EST
973	CACCGCCT		up	up	70.m14862	AN1367.1	AO070215000014	WD40 repeat nucleolar protein Bop1, involved in ribosome biogenesis	J		0.72808	1	1	1	0	55	33	19	No EST	No EST
973	CACCGCCT		up	up	70.m14844	AN1379.1	AO070243000010	mRNA export protein (contains WD40 repeats)	A	1	0.00018461	1	2	1	0	297	87	145	135	1
973	CACCGCCT		up	up	55.m02969	AN1467.1	AO070306000090	Serine/threonine protein phosphatase	T		1.94023	2	1	2	1	383	84	131	177	1
973	CACCGCCT		up	up	55.m03057	AN1538.1	AO070334000262	Transcription initiation factor IIF, small subunit (RAP30)	K		3.57953	1	2	1	1	207	165	175	No EST	No EST
973	CACCGCCT		up	up	58.m07724	AN1638.1	AO070299000044	Puromycin-sensitive aminopeptidase and related aminopeptidases	EO		4.39369814917025 0.126123344831786	2	1	1	0	212	147	124	No EST	No EST
973	CACCGCCT		up	up	58.m07570	AN1965.1	AO070301000046	Ribose-phosphate pyrophosphokinase	FE		8.15609785366271 4.39369814917025	1	1	1	0	283	83	29	125	1
973	CACCGCCT		up	up	58.m07575	AN1970.1	AO070301000054	Mitochondrial/chloroplast ribosomal protein L28	J		0.72808	1	1	1	0	180	28	24	No EST	No EST
973	CACCGCCT		up	up	72.m19694	AN2147.1	AO070343000196	rRNA processing protein Rrp5	A	1	0.00018461	2	2	2	1	139	13	13	No EST	No EST
973	CACCGCCT		up	up	71.m15881	AN2247.1	AO070326000126	Myosin class II heavy chain	Z		5.71718	1	1	1	0	163	87	66	No EST	No EST
973	CACCGCCT		up	up	54.m06683	AN2748.1	AO070338000223	FOG: Zn-finger				1	1	1	0	139	30	29	No EST	No EST
973	CACCGCCT		up	up	59.m08713	AN2868.1	AO070338000154	Oligoribonuclease (3'->5' exoribonuclease)	A	1	0.00018461	2	1	1	1	208	324	354	No EST	No EST
973	CACCGCCT		up	up	59.m09396	AN2911.1	AO070338000094	Transcriptional activator FOSB/c-Fos and related bZIP transcription factors	K		3.57953	1	1	1	1	444	37	42	No EST	No EST
973	CACCGCCT		up	down	59.m08982	AN3035.1	AO070337000077	5'-3' exonuclease	L		5.66424	1	2	1	0	412	318	446			No EST	No EST
973	CACCGCCT		up	up	59.m08566	AN3176.1	AO070256000014	ATP-dependent RNA helicase	A	1	0.00018461	1	1	1	1	126	156	144	No EST	No EST
973	CACCGCCT		up	up	59.m09501	AN3423.1	AO070327000008	Transcription elongation factor SPT6	A	1	0.00018461	1	1	1	0	297	49	116	No EST	No EST
973	CACCGCCT		up	down	59.m09483	AN3453.1	AO070265000029	Ubiquitin C-terminal hydrolase	O		0.126123	1	2	1	0	177	230	207			75	0
973	CACCGCCT		up	up	57.m05696	AN3787.1	AO070337000242	Peptide:N-glycanase	O		0.126123	1	1	1	0	215	85	96	No EST	No EST
973	CACCGCCT		up	up	58.m07818	AN3842.1	AO070305000077	GTPase Rab5/YPT51 and related small G protein superfamily GTPases	U		2.77135	1	1	1	1	288	7	9	151	1
973	CACCGCCT		up	up	54.m07047	AN4112.1	AO070342000107	Nucleolar GTPase/ATPase p130	Y		0.416033	1	1	1	0	203	36	79	No EST	No EST
973	CACCGCCT		up	up	54.m06754	AN4192.1	AO070342000112	Molecular chaperone (DnaJ superfamily)	O		0.126123	1	1	1	1	98	483	453	No EST	No EST
973	CACCGCCT		up	up	54.m06790	AN4226.1	AO070234000023	Sof1-like rRNA processing protein (contains WD40 repeats)	A	1	0.00018461	1	1	1	1	140	50	30	55	1
973	CACCGCCT		up	up	58.m08016	AN4308.1	AO070207000013	Mitochondrial/chloroplast ribosomal protein L3	J		0.72808	1	1	1	0	46	173	216	11	0
973	CACCGCCT		up	down	58.m09007	AN4333.1	AO070240000012	predicted protein [Neurospora crassa]				1	1	1	0	327	200	382			No EST	No EST
973	CACCGCCT		up	up	58.m07981	AN4346.1	AO070240000018	Nucleolar RNA-binding protein NIFK				1	1	1	1	25	15	45	24	1
973	CACCGCCT		up	down	58.m07937	AN4387.1	AO070261000033	Mitochondrial FAD carrier protein	C		2.87699	1	1	1	0	320	146	321			No EST	No EST
973	CACCGCCT		up	up	58.m08982	AN4411.1	AO070273000031	hypothetical protein ( (AL513462) related to Sts1 protein [Neurospora crassa] )				1	1	1	1	244	78	82	No EST	No EST
973	CACCGCCT		up	up	58.m07904	AN4415.1	AO070273000036	Holocytochrome c synthase/heme-lyase	CO		2.87699093111136 0.126123344831786	1	1	2	0	132	42	104	No EST	No EST
973	CACCGCCT		up	up	58.m07860	AN4470.1	AO070305000129	Translation initiation factor 2, gamma subunit (eIF-2gamma; GTPase)	J		0.72808	1	1	2	0	186	38	68	97	1
973	CACCGCCT		up	up	58.m07861	AN4471.1	AO070305000130	WD40 repeat-containing protein				1	1	1	0	122	146	258	36	0
973	CACCGCCT		up	up	57.m05499	AN4581.1	AO070316000164	Protein involved in high osmolarity signaling pathway	T		1.94023	1	1	1	0	112	52	62	No EST	No EST
973	CACCGCCT		up	up	59.m09126	AN4850.1	AO070327000106	RNA-binding protein RBM5 and related proteins, contain G-patch and RRM domains				1	1	1	0	83	225	41	No EST	No EST
973	CACCGCCT		up	up	59.m09108	AN4864.1	AO070329000150	Glucosyltransferase - Alg6p	GE		1.81077964157289 4.39369814917025	1	1	2	1	276	34	60	No EST	No EST
973	CACCGCCT		up	up	59.m08858	AN4953.1	AO070288000006	Ras-related small GTPase, Rho type				2	1	1	1	99	130	156	345	1
973	CACCGCCT		up	up	59.m09494	AN5022.1	AO070338000182	Dynactin, subunit p25	Z		5.71718	1	1	3	0	118	57	10	No EST	No EST
973	CACCGCCT		up	up	54.m06817	AN5702.1	AO070324000158	Uncharacterized conserved protein				2	1	1	0	96	68	128	No EST	No EST
973	CACCGCCT		up	up	54.m06828	AN5713.1	AO070324000145	Chaperonin complex component, TCP-1 eta subunit (CCT7)	O		0.126123	1	1	1	1	189	85	70	No EST	No EST
973	CACCGCCT		up	down	72.m19268	AN5866.1	AO070308000130	Arylalkylamine N-acetyltransferase				1	1	1	1	54	69	81			No EST	No EST
973	CACCGCCT		up	up	72.m19263	AN5871.1	AO070308000137	Predicted RNA methylase involved in rRNA processing	A	1	0.00018461	1	1	1	0	231	131	15	No EST	No EST
973	CACCGCCT		up	up	72.m19188	AN5972.1	AO070340000330	Vesicle coat complex COPI, beta' subunit	U		2.77135	1	1	1	1	282	23	55	370	1
973	CACCGCCT		up	up	72.m19097	AN6061.1	AO070340000187	hypothetical protein [Schizosaccharomyces pombe]				1	1	1	0	459	8	45	32	1
973	CACCGCCT		up	up	72.m19947	AN6073.1	AO070340000117	Prohibitin-like protein	O		0.126123	1	1	1	0	86	71	70	No EST	No EST
973	CACCGCCT		up	up	72.m19048	AN6110.1	AO070340000096	Uncharacterized conserved protein				1	1	1	1	113	11	11	No EST	No EST
973	CACCGCCT		up	up	72.m19002	AN6171.1	AO070340000034	U3 small nucleolar ribonucleoprotein (snoRNP) component	A	1	0.00018461	1	1	2	0	110	88	166	41	0
973	CACCGCCT		up	up	72.m19323	AN6311.1	AO070308000066	Cl- channel CLC-3 and related proteins (CLC superfamily)	P		5.87585	1	1	1	1	137	23	22	No EST	No EST
973	CACCGCCT		up	up	72.m19493	AN6367.1	AO070279000053	Phosphatidylinositol-4-phosphate 5-kinase and related FYVE finger-containing proteins	T		1.94023	1	1	1	0	190	52	41	No EST	No EST
973	CACCGCCT		up	up	62.m03148	AN6561.1	AO070326000002	Uncharacterized conserved protein				1	1	1	1	143	95	138	55	0
973	CACCGCCT		up	up	62.m03207	AN6591.1	AO070326000039	Nuclear export receptor CSE1/CAS (importin beta superfamily)	YU		0.416033420152047 2.77134743294217	1	1	1	1	228	157	154	No EST	No EST
973	CACCGCCT		up	up	65.m07285	AN6698.1	AO070339000130	Uncharacterized conserved protein				1	1	1	0	82	377	281	32	0
973	CACCGCCT		up	up	65.m07244	AN6726.1	AO070339000170	20S proteasome, regulatory subunit alpha type PSMA2/PRE8	O		0.126123	1	1	1	0	187	22	40	No EST	No EST
973	CACCGCCT		up	up	72.m19795	AN7254.1	AO070297000010	AAA+-type ATPase	O		0.126123	1	1	1	0	249	57	74	106	1
973	CACCGCCT		up	up	72.m19751	AN7312.1	AO070297000060	tRNA nucleotidyltransferase/poly(A) polymerase	J		0.72808	1	1	1	0	143	121	134	No EST	No EST
973	CACCGCCT		up	up	69.m15143	AN7525.1	AO070258000031	ATPases involved in chromosome partitioning	D		5.96642	1	2	1	0	19	10	8	No EST	No EST
973	CACCGCCT		up	up	72.m19649	AN7608.1	AO070343000269	RNA Polymerase C (III) 37 kDa subunit	K		3.57953	1	1	1	1	143	187	113	No EST	No EST
973	CACCGCCT		up	up	57.m05423	AN7659.1	AO070268000028	ATP-dependent RNA helicase	A	1	0.00018461	1	1	1	0	379	22	21	172	1
973	CACCGCCT		up	down	71.m15755	AN7731.1	AO070325000145	Nuclear transport receptor LGL2 (importin beta superfamily)	YU		0.416033420152047 2.77134743294217	1	1	1	0	32	20	22			No EST	No EST
973	CACCGCCT		up	up	53.m03900	AN8044.1	AO070292000105	N-arginine dibasic convertase NRD1 and related Zn2+-dependent endopeptidases, insulinase superfamily	O		0.126123	2	1	2	0	348	33	71	No EST	No EST
973	CACCGCCT		up	up	53.m03925	AN8072.1	AO070330000030	hypothetical protein B13N20.140 [imported] - Neurospora crassa				1	1	1	0	75	28	27	No EST	No EST
973	CACCGCCT		up	up	53.m03694	AN8264.1	AO070310000036	hypothetical protein [Schizosaccharomyces pombe]				2	2	2	0	171	286	332	No EST	No EST
973	CACCGCCT		up	up	58.m08926	AN8488.1	AO070299000105	SNARE protein YKT6, synaptobrevin/VAMP syperfamily	U		2.77135	1	1	1	0	90	71	32	No EST	No EST
973	CACCGCCT		up	up	62.m03394	AN8676.1	AO070315000096	Regulator of arginine metabolism and related MADS box-containing transcription factors	K		3.57953	1	1	1	1	239	236	311	157	0
973	CACCGCCT		up	up	62.m03389	AN8682.1	AO070315000102	Exosomal 3'-5' exoribonuclease complex, subunit Rrp43	J		0.72808	1	1	2	1	121	385	87	No EST	No EST
973	CACCGCCT		up	up	62.m03357	AN8712.1	AO070315000138	Translation initiation factor 1A (eIF-1A)	J		0.72808	1	0	1	0	247	0	1	96	1
973	CACCGCCT		up	up	71.m15960	AN8828.1	AO070271000052	Transport protein particle (TRAPP) complex subunit	U		2.77135	1	1	1	0	148	220	77	No EST	No EST
973	CACCGCCT		up	up	52.m04024	AN9398.1	AO070274000018	Cell adhesion complex protein bystin				1	1	1	0	251	155	20	No EST	No EST
973	CACCGCCT		up	up	53.m03781	AN9461.1	AO070310000129	Dehydrogenase kinase	T		1.94023	1	1	1	0	67	69	116	No EST	No EST
973	CACCGCCT		up	up	62.m03341	AN9504.1	AO070315000153	Ras GTPase activating protein RasGAP/neurofibromin	V		6.90624	2	1	2	1	294	49	35	No EST	No EST
992	GCATAGCG		down	down	71.m16095	AN0226.1	AO070284000066	Ubiquitin-protein ligase	O		0.899767	1	1	1	0	97	52	112			No EST	No EST
992	GCATAGCG		down	down	54.m06984	AN0321.1	AO070334000005	RNA polymerase III, second largest subunit	K		0.297321	1	1	1	1	103	70	66			No EST	No EST
992	GCATAGCG		down	down	70.m14899	AN1335.1	AO070303000097	G-protein beta subunit-like protein (contains WD40 repeats)				1	1	1	1	111	68	64			No EST	No EST
992	GCATAGCG		down	down	58.m07735	AN1668.1	AO070299000050	Predicted E3 ubiquitin ligase containing RING finger, subunit of transcription/repair factor TFIIH and CDK-activating kinase assembly factor	O		0.899767	1	1	1	1	103	46	93			No EST	No EST
992	GCATAGCG		down	down	69.m14936	AN1918.1	AO070341000122	Phosphoenolpyruvate carboxykinase (ATP)	C		3.00218	1	1	1	1	43	78	59			195	1
992	GCATAGCG		down	down	59.m08753	AN2902.1	AO070338000104	TFIIF-interacting CTD phosphatases, including NLI-interacting factor	K		0.297321	2	1	2	0	94	113	180			295	1
992	GCATAGCG		down	up	59.m09040	AN2967.1	AO070337000149	tRNA-dihydrouridine synthase	J		1.45683	1	1	1	0	20	461	500	No EST	No EST
992	GCATAGCG		down	down	59.m08521	AN3144.1	AO070256000047	FYVE finger-containing protein				2	2	1	1	94	72	126			257	1
992	GCATAGCG		down	down	69.m15409	AN3705.1	AO070341000329	Uncharacterized conserved protein				1	1	1	1	76	76	84			No EST	No EST
992	GCATAGCG		down	down	65.m07425	AN4253.1	AO070309000123	predicted protein [Neurospora crassa]				1	1	1	1	98	142	112			288	1
992	GCATAGCG		down	down	57.m05571	AN4559.1	AO070321000169	Molecular chaperone (DnaJ superfamily)	O		0.899767	1	1	1	1	125	119	121			12	0
992	GCATAGCG		down	down	59.m09173	AN4803.1	AO070329000036	Ribosomal protein S4	J		1.45683	1	1	1	1	81	71	71			164	1
992	GCATAGCG		down	down	59.m08812	AN4908.1	AO070338000038	Uncharacterized protein CLU1/cluA/TIF31 involved in mitochondrial morphology/distribution, also found associated with eIF-3				2	1	1	0	242	253	244			No EST	No EST
992	GCATAGCG		down	down	54.m06906	AN5119.1	AO070291000062	Predicted methyltransferase				2	1	1	1	58	177	201			No EST	No EST
992	GCATAGCG		down	down	69.m15442	AN5517.1	AO070341000376	Cdc4 and related F-box and WD-40 proteins				1	1	1	1	196	202	165			No EST	No EST
992	GCATAGCG		down	down	65.m07417	AN5693.1	AO070309000108	Uncharacterized conserved protein				2	1	1	1	78	75	186			319	1
992	GCATAGCG		down	down	72.m19257	AN5875.1	AO070308000144	rRNA processing protein	JD		1.45682789386515 2.45984236489557	1	1	1	1	101	98	105			173	1
992	GCATAGCG		down	down	72.m19327	AN6307.1	AO070308000062	Lectin VIP36, involved in the transport of glycoproteins carrying high mannose-type glycans	U		3.01739	1	1	1	1	6	25	6			No EST	No EST
992	GCATAGCG		down	down	65.m07490	AN6696.1	AO070339000127	hypothetical protein [Neurospora crassa]				1	2	1	1	128	111	121			No EST	No EST
992	GCATAGCG		down	down	71.m15293	AN6823.1	AO070314000102	hypothetical protein ( (AL513443) hypothetical protein [Neurospora crassa] )				1	2	1	1	58	12	47			No EST	No EST
992	GCATAGCG		down	down	53.m03693	AN8268.1	AO070310000034	RasGAP SH3 binding protein rasputin, contains NTF2 and RRM domains	T		3.0171	1	1	1	1	312	319	433			No EST	No EST
992	GCATAGCG		down	down	66.m04585	AN9125.1	AO070332000149	RNA polymerase III, subunit C34	K		0.297321	1	1	1	1	44	33	36			72	1
1059	TCGGCCCG		up	up	71.m15469	AN0204.1	AO070321000040	ATP-dependent RNA helicase	A		2.59649	1	1	1	1	102	60	78	37	0
1059	TCGGCCCG		up	up	54.m06472	AN0271.1	AO070334000077	dUTPase	F		1.13858	1	1	1	1	122	17	15	42	1
1059	TCGGCCCG		up	up	70.m15479	AN0876.1	AO070320000035	Conserved protein/domain typically associated with flavoprotein oxygenases, DIM6/NTAB family				1	1	1	1	37	378	177	No EST	No EST
1059	TCGGCCCG		up	up	70.m15135	AN1095.1	AO070285000047	Mitochondrial/chloroplast ribosomal protein L15/L10	J		2.96534	1	1	1	1	95	307	336	No EST	No EST
1059	TCGGCCCG		up	up	69.m15077	AN1778.1	AO070324000018	Ketopantoate hydroxymethyltransferase	H		1.49716	1	1	1	1	499	4	8	No EST	No EST
1059	TCGGCCCG		up	up	59.m08568	AN3186.1	AO070256000012	5'-3' exonuclease	L		2.23219	1	1	1	1	142	42	60	No EST	No EST
1059	TCGGCCCG		up	up	57.m05587	AN4534.1	AO070321000148	Uncharacterized conserved protein				1	1	1	1	96	108	149	No EST	No EST
1059	TCGGCCCG		up	up	69.m14874	AN5177.1	AO070247000008	WD40 repeat protein				1	1	1	1	85	207	154	No EST	No EST
1059	TCGGCCCG		up	up	69.m14806	AN5790.1	AO070249000036	Isocitrate dehydrogenase, gamma subunit	E		3.07422	1	1	1	0	226	329	304	205	0
1059	TCGGCCCG		up	up	72.m19149	AN5991.1	AO070340000286	AAA+-type ATPase	O		1.31293	2	1	1	1	156	60	31	No EST	No EST
1059	TCGGCCCG		up	up	72.m19133	AN6010.1	AO070340000269	Molecular chaperones mortalin/PBP74/GRP75, HSP70 superfamily	O		1.31293	2	1	1	1	61	283	287	149	0
1059	TCGGCCCG		up	down	62.m03439	AN6500.1	AO070222000014	60S ribosomal protein L28	J		2.96534	1	1	1	1	343	309	339			212	0
1059	TCGGCCCG		up	up	72.m19644	AN7603.1	AO070343000273	Vacuolar H+-ATPase V0 sector, subunit c''	C		2.85221	1	1	1	1	172	61	79	No EST	No EST
1093	CCCCTCCCCC		up	up	54.m06397	AN0357.1	AO070318000033	Cytochrome c1	C		0.346482	2	1	2	1	61	207	200	No EST	No EST
1093	CCCCTCCCCC		up	up	54.m06659	AN0417.1	AO070338000265	Sec61 protein translocation complex, beta subunit	O		2.43446	1	1	2	0	21	299	139	No EST	No EST
1093	CCCCTCCCCC		up	down	69.m15252	AN0595.1	AO070280000021	NADP/FAD dependent oxidoreductase	C		0.346482	1	1	1	0	57	4	201			No EST	No EST
1093	CCCCTCCCCC		up	up	70.m15291	AN0688.1	AO070343000525	Transketolase	G		0.0454096	1	2	3	0	58	275	296	66	0
1093	CCCCTCCCCC		up	up	70.m15358	AN0756.1	AO070343000444	Beta-galactosidase	G		0.0454096	1	1	1	0	39	227	201	No EST	No EST
1093	CCCCTCCCCC		up	down	70.m15391	AN0781.1	AO070316000055	Atu related protein [imported] - Neurospora crassa				2	1	4	0	38	231	70			374	1
1093	CCCCTCCCCC		up	up	70.m15397	AN0787.1	AO070239000021	Mannosyl-oligosaccharide alpha-1,2-mannosidase and related glycosyl hydrolases	G		0.0454096	1	1	1	0	106	421	316	No EST	No EST
1093	CCCCTCCCCC		up	up	70.m15515	AN0906.1	AO070320000082	Karyopherin (importin) beta 1	YU		0.550091990129638 0.464854686559532	2	1	1	0	60	462	55	No EST	No EST
1093	CCCCTCCCCC		up	up	70.m15808	AN0926.1	AO070320000110	Nuclear transport receptor Karyopherin-beta2/Transportin (importin beta superfamily)	YU		0.550091990129638 0.464854686559532	1	2	1	0	116	272	181	No EST	No EST
1093	CCCCTCCCCC		up	up	70.m15540	AN0932.1	AO070320000123	Pyridine nucleotide-disulphide oxidoreductase	Q		4.20393	1	1	1	0	321	140	242	No EST	No EST
1093	CCCCTCCCCC		up	up	70.m15233	AN1015.1	AO070312000003	Glycogen phosphorylase	G		0.0454096	3	1	3	0	246	60	249	No EST	No EST
1093	CCCCTCCCCC		up	up	70.m15137	AN1094.1	AO070285000053	NADH-dehydrogenase (ubiquinone)	C		0.346482	2	2	1	0	28	363	496	No EST	No EST
1093	CCCCTCCCCC		up	up	70.m15118	AN1117.1	AO070331000109	Putative cargo transport protein ERV29	U		0.464855	2	2	1	0	143	264	275	192	0
1093	CCCCTCCCCC		up	up	70.m15040	AN1177.1	AO070331000173	Vesicle coat complex COPI, beta subunit	U		0.464855	1	2	1	1	57	165	165	No EST	No EST
1093	CCCCTCCCCC		up	up	70.m15003	AN1222.1	AO070331000222	S-adenosylmethionine synthetase	H		5.37315	4	1	2	0	55	152	150	193	1
1093	CCCCTCCCCC		up	up	70.m14906	AN1325.1	AO070303000088	Protein interacting with poly(A)-binding protein	A		5.05907	1	1	1	0	299	196	94	No EST	No EST
1093	CCCCTCCCCC		up	up	70.m15731	AN1358.1	AO070237000002	Serine/threonine protein phosphatase	T		1.43571	1	2	1	0	160	297	349	400	1
1093	CCCCTCCCCC		up	up	70.m14845	AN1378.1	AO070243000008	predicted protein [Neurospora crassa]				3	4	3	1	275	121	175	189	1
1093	CCCCTCCCCC		up	up	70.m14839	AN1382.1	AO070243000014	hypothetical protein [Neurospora crassa]				1	1	1	0	202	175	144	No EST	No EST
1093	CCCCTCCCCC		up	up	70.m14826	AN1396.1	AO070233000012	Glycerol-3-phosphate dehydrogenase	C		0.346482	3	1	2	0	358	286	5	No EST	No EST
1093	CCCCTCCCCC		up	down	55.m03263	AN1437.1	AO070232000002	hypothetical protein [Neurospora crassa]				1	1	1	0	436	183	331			No EST	No EST
1093	CCCCTCCCCC		up	up	58.m08961	AN1720.1	AO070305000035	predicted protein [Neurospora crassa]				1	1	1	0	354	236	256	No EST	No EST
1093	CCCCTCCCCC		up	up	69.m15048	AN1745.1	AO070324000051	Nicotinic acid mononucleotide adenylyltransferase	H		5.37315	1	1	1	0	184	205	349	No EST	No EST
1093	CCCCTCCCCC		up	down	58.m07668	AN1843.1	AO070292000064	Protein involved in meiotic recombination/predicted coiled-coil protein	D		6.11141	3	3	2	1	266	165	281			No EST	No EST
1093	CCCCTCCCCC		up	up	57.m05716	AN1902.1	AO070341000151	Nucleolar GTPase/ATPase p130	Y		0.550092	1	1	1	1	80	137	122	469	1
1093	CCCCTCCCCC		up	up	58.m08946	AN1980.1	AO070301000065	Rab6 GTPase activator GAPCenA and related TBC domain proteins				1	2	1	0	143	37	185	No EST	No EST
1093	CCCCTCCCCC		up	up	72.m19708	AN2133.1	AO070278000026	Armadillo/beta-Catenin/plakoglobin	TZ		1.4357064521095 5.96018858219753	1	3	1	0	184	23	156	No EST	No EST
1093	CCCCTCCCCC		up	up	72.m19699	AN2142.1	AO070343000188	Karyopherin (importin) alpha	U		0.464855	2	1	1	0	85	50	52	No EST	No EST
1093	CCCCTCCCCC		up	up	71.m15917	AN2272.1	AO070295000048	Possible pfkB family carbohydrate kinase	G		0.0454096	1	1	1	0	123	46	45	91	1
1093	CCCCTCCCCC		up	up	71.m15938	AN2290.1	AO070295000069	FOG: Zn-finger				2	1	1	0	358	25	16	No EST	No EST
1093	CCCCTCCCCC		up	up	69.m15223	AN2435.1	AO070264000043	ATP-citrate lyase	C		0.346482	2	3	2	0	115	165	160	187	1
1093	CCCCTCCCCC		up	up	71.m15179	AN2692.1	AO070313000096					1	1	1	0	255	134	112	204	1
1093	CCCCTCCCCC		up	down	54.m06688	AN2743.1	AO070338000228	Translation initiation factor 3, subunit a (eIF-3a)	J		1.73643	1	2	1	0	75	56	232			No EST	No EST
1093	CCCCTCCCCC		up	up	59.m09396	AN2911.1	AO070338000094	Transcriptional activator FOSB/c-Fos and related bZIP transcription factors	K		4.02355	2	2	1	1	85	40	45	No EST	No EST
1093	CCCCTCCCCC		up	up	59.m08981	AN3036.1	AO070337000078	predicted protein [Neurospora crassa]				2	1	1	0	151	22	34	No EST	No EST
1093	CCCCTCCCCC		up	up	59.m08959	AN3059.1	AO070337000014	Phosphoglycerate mutase	G		0.0454096	1	1	2	1	227	13	18	25	1
1093	CCCCTCCCCC		up	up	59.m08649	AN3094.1	AO070334000135	Rab6 GTPase activator GAPCenA and related TBC domain proteins				1	1	2	0	82	373	15	No EST	No EST
1093	CCCCTCCCCC		up	up	59.m08644	AN3100.1	AO070334000141	predicted protein [Neurospora crassa]				1	3	1	1	325	129	307	106	0
1093	CCCCTCCCCC		up	up	59.m08623	AN3114.1	AO070303000035	predicted protein [Neurospora crassa]				3	1	2	0	153	127	326	No EST	No EST
1093	CCCCTCCCCC		up	up	66.m04646	AN3376.1	AO070281000020	Squalene synthetase	I		3.91901	1	1	1	0	34	365	104	298	0
1093	CCCCTCCCCC		up	up	54.m07029	AN3503.1	AO070306000124	Permease of the major facilitator superfamily	G		0.0454096	1	1	1	0	94	221	228	No EST	No EST
1093	CCCCTCCCCC		up	up	58.m07376	AN3578.1	AO070342000171	Predicted MutS-related protein involved in mismatch repair	L		4.89667	2	1	1	0	235	442	89	No EST	No EST
1093	CCCCTCCCCC		up	up	58.m07414	AN3627.1	AO070342000123	hypothetical protein [Neurospora crassa]				2	2	1	0	256	188	463	212	1
1093	CCCCTCCCCC		up	up	65.m07359	AN3763.1	AO070309000041	Predicted transporter (major facilitator superfamily)				1	1	1	0	158	332	391	No EST	No EST
1093	CCCCTCCCCC		up	up	54.m06800	AN4218.1	AO070315000081	Translation elongation factor EF-1 alpha/Tu	J		1.73643	3	1	1	1	147	262	315	96	0
1093	CCCCTCCCCC		up	up	58.m07953	AN4376.1	AO070261000018	Glutamate/leucine/phenylalanine/valine dehydrogenases	E		3.67653	1	1	2	0	176	126	38	100	0
1093	CCCCTCCCCC		up	down	58.m07953	AN4376.1	AO070261000018	Glutamate/leucine/phenylalanine/valine dehydrogenases	E		3.67653	1	1	1	0	8	5	26			168	1
1093	CCCCTCCCCC		up	up	58.m07928	AN4395.1	AO070261000040	hypothetical protein [Neurospora crassa]				1	2	1	0	279	77	203	762	1
1093	CCCCTCCCCC		up	up	58.m07925	AN4401.1	AO070261000045	Asparagine synthase (glutamine-hydrolyzing)	E		3.67653	1	1	1	0	99	65	99	341	1
1093	CCCCTCCCCC		up	up	58.m07892	AN4433.1	AO070273000024	FOG: PPR repeat				1	1	1	0	221	76	59	No EST	No EST
1093	CCCCTCCCCC		up	up	58.m07882	AN4443.1	AO070273000010	Methionine synthase II (cobalamin-independent)	E		3.67653	2	2	2	0	249	231	148	66	0
1093	CCCCTCCCCC		up	up	58.m07847	AN4462.1	AO070305000113	Pyruvate carboxylase	C		0.346482	2	3	3	0	126	256	44	No EST	No EST
1093	CCCCTCCCCC		up	up	57.m05654	AN4479.1	AO070311000025	FOG: HAMP domain	T		1.43571	1	1	2	0	206	170	315	No EST	No EST
1093	CCCCTCCCCC		up	up	59.m09466	AN4859.1	AO070329000143	Plasma membrane H+-transporting ATPase	P		5.12393	1	1	1	0	114	315	352	103	0
1093	CCCCTCCCCC		up	up	59.m08858	AN4953.1	AO070288000006	Ras-related small GTPase, Rho type				3	2	1	1	93	218	271	345	1
1093	CCCCTCCCCC		up	up	59.m08876	AN4973.1	AO070288000039	predicted protein [Neurospora crassa]				2	2	1	0	40	219	278	No EST	No EST
1093	CCCCTCCCCC		up	up	69.m15551	AN5356.1	AO070333000156	Mitochondrial carnitine-acylcarnitine carrier protein	C		0.346482	1	2	1	0	50	242	350	No EST	No EST
1093	CCCCTCCCCC		up	up	58.m07475	AN5529.1	AO070328000064	NDR and related serine/threonine kinases				1	1	3	1	106	315	128	No EST	No EST
1093	CCCCTCCCCC		up	up	58.m07489	AN5563.1	AO070328000044	Aldo/keto reductase family proteins				1	1	2	0	127	285	433	278	0
1093	CCCCTCCCCC		up	up	58.m07508	AN5589.1	AO070328000022	Ribulose kinase and related carbohydrate kinases	G		0.0454096	1	1	1	0	423	355	179	439	1
1093	CCCCTCCCCC		up	up	58.m07549	AN5626.1	AO070301000025	Acyl-CoA synthetase	I		3.91901	1	3	2	0	374	216	174	66	0
1093	CCCCTCCCCC		up	up	72.m19247	AN5884.1	AO070245000024	Uridine 5'- monophosphate synthase/orotate phosphoribosyltransferase	F		4.0919	1	2	1	0	194	120	194	No EST	No EST
1093	CCCCTCCCCC		up	up	72.m19952	AN5931.1	AO070340000344	ATP-dependent RNA helicase	A		5.05907	1	1	2	0	165	64	125	111	1
1093	CCCCTCCCCC		up	up	72.m19291	AN6193.1	AO070308000106	Mitochondrial ATP-dependent protease PIM1/LON	O		2.43446	1	1	1	0	29	41	90	128	1
1093	CCCCTCCCCC		up	up	72.m19295	AN6195.1	AO070308000098	FOG: Zn-finger				2	1	2	0	451	19	12	386	1
1093	CCCCTCCCCC		up	up	72.m19978	AN6231.1	AO070304000084	Tryptophan synthase beta chain	E		3.67653	1	1	1	0	120	286	467	81	0
1093	CCCCTCCCCC		up	up	72.m19409	AN6251.1	AO070304000036	Diadenosine and diphosphoinositol polyphosphate phosphohydrolase	T		1.43571	1	2	1	0	318	19	8	No EST	No EST
1093	CCCCTCCCCC		up	up	72.m19329	AN6305.1	AO070308000060	cAMP-dependent protein kinase catalytic subunit (PKA)	T		1.43571	1	1	1	0	144	94	361	No EST	No EST
1093	CCCCTCCCCC		up	up	62.m03087	AN6499.1	AO070222000013	NAD-dependent malate dehydrogenase	C		0.346482	2	2	2	0	192	373	375	105	0
1093	CCCCTCCCCC		up	up	62.m03157	AN6570.1	AO070326000013	Protein involved in Snf1 protein kinase complex assembly	G		0.0454096	1	1	1	0	48	292	438	No EST	No EST
1093	CCCCTCCCCC		up	up	62.m03158	AN6578.1	AO070326000025	Gluconate transport-inducing protein	TG		1.4357064521095 0.0454095528728674	3	2	2	0	69	159	25	No EST	No EST
1093	CCCCTCCCCC		up	up	62.m03234	AN6639.1	AO070326000091	Uncharacterized protein involved in propionate catabolism				1	2	1	0	46	205	274	21	0
1093	CCCCTCCCCC		up	up	65.m07502	AN6688.1	AO070339000095	Septin family protein (P-loop GTPase)	DZU		6.11141064805511 5.96018858219753 0.464854686559532	1	1	1	0	253	175	170	835	1
1093	CCCCTCCCCC		up	up	71.m15272	AN6859.1	AO070314000076	RNA polymerase II C-terminal domain-binding protein RA4, contains RPR and RRM domains	AK		5.05907060003855 4.02355426282144	1	1	2	1	265	295	68	78	0
1093	CCCCTCCCCC		up	up	57.m05909	AN7438.1	AO070229000006	Thyroid hormone receptor-associated coactivator complex component (TRAP170)	K		4.02355	1	1	1	0	35	471	332	No EST	No EST
1093	CCCCTCCCCC		up	up	57.m05843	AN7498.1	AO070287000016	HEAT repeat-containing protein				1	1	1	1	147	129	23	No EST	No EST
1093	CCCCTCCCCC		up	up	72.m19619	AN7594.1	AO070343000316	Uncharacterized conserved protein				1	1	1	0	254	226	211	74	0
1093	CCCCTCCCCC		up	up	71.m15748	AN7721.1	AO070325000136	Transport protein Sec61, alpha subunit	UO		0.464854686559532 2.43446036577448	1	1	1	0	146	88	90	106	1
1093	CCCCTCCCCC		up	up	71.m16099	AN7741.1	AO070325000162	Adaptor complexes medium subunit family	U		0.464855	1	1	1	0	59	151	278	No EST	No EST
1093	CCCCTCCCCC		up	up	53.m03857	AN8010.1	AO070322000057	Glycogen synthase	G		0.0454096	1	1	3	0	351	237	175	293	1
1093	CCCCTCCCCC		up	up	53.m03891	AN8051.1	AO070292000094	predicted protein [Neurospora crassa]				1	2	3	0	136	229	308	No EST	No EST
1093	CCCCTCCCCC		up	up	53.m03888	AN8055.1	AO070322000145	RNA-binding Ran Zn-finger protein and related proteins				1	3	2	1	251	220	250	No EST	No EST
1093	CCCCTCCCCC		up	up	53.m03687	AN8273.1	AO070310000028	Ubiquinol cytochrome c reductase, subunit QCR2	C		0.346482	1	1	1	0	26	126	146	120	0
1093	CCCCTCCCCC		up	up	53.m04091	AN8277.1	AO070310000023	Cystathionine beta-lyases/cystathionine gamma-synthases	E		3.67653	1	1	1	0	168	472	184	57	0
1093	CCCCTCCCCC		up	up	62.m03407	AN8667.1	AO070269000068	GATA-4/5/6 transcription factors	K		4.02355	1	3	2	0	190	488	363	No EST	No EST
1093	CCCCTCCCCC		up	up	62.m03324	AN8751.1	AO070250000011	NDR and related serine/threonine kinases				3	1	2	0	55	66	28	No EST	No EST
1093	CCCCTCCCCC		up	up	66.m04541	AN9083.1	AO070332000196	Adenine phosphoribosyl transferases	F		4.0919	2	1	1	0	267	470	437	No EST	No EST
1093	CCCCTCCCCC		up	up	54.m06486	AN9448.1	AO070334000061	predicted protein [Neurospora crassa]				1	1	1	0	540	17	12	No EST	No EST
1093	CCCCTCCCCC		up	up	53.m03730	AN9521.1	AO070310000069	Ca2+-binding protein, EF-Hand protein superfamily	T		1.43571	1	1	1	0	166	278	357	No EST	No EST
1132	CCCCTCT		up	up	71.m15444	AN0170.1	AO070321000076	Thioredoxin	O		1.22831	1	1	1	1	266	6	8	207	1
1132	CCCCTCT		up	up	54.m06442	AN0316.1	AO070334000016	Alpha tubulin	Z		0.214887	1	1	1	0	181	200	265	27	0
1132	CCCCTCT		up	up	70.m15248	AN0646.1	AO070343000583	RNA helicase nonsense mRNA reducing factor (pNORF1)	A		2.19053	1	1	1	1	229	23	26	59	1
1132	CCCCTCT		up	up	70.m14845	AN1378.1	AO070243000008	predicted protein [Neurospora crassa]				2	2	1	0	307	127	209	189	1
1132	CCCCTCT		up	up	69.m14935	AN1917.1	AO070341000123	Mitochondrial oxoglutarate/malate carrier proteins	C		0.683767	2	1	1	0	249	200	228	No EST	No EST
1132	CCCCTCT		up	down	57.m05760	AN2062.1	AO070341000205	Molecular chaperones GRP78/BiP/KAR2, HSP70 superfamily	O		1.22831	1	1	1	1	9	8	7			130	1
1132	CCCCTCT		up	up	58.m07379	AN3581.1	AO070342000168	Thioredoxin reductase	O		1.22831	1	1	1	0	314	35	2	163	1
1132	CCCCTCT		up	up	58.m07404	AN3606.1	AO070342000159	predicted protein [Neurospora crassa]				1	1	1	1	368	188	193	No EST	No EST
1132	CCCCTCT		up	down	58.m07982	AN4342.1	AO070240000017	Tryptophan-rich basic nuclear protein				2	1	1	0	101	290	451			No EST	No EST
1132	CCCCTCT		up	up	59.m09224	AN4759.1	AO070327000057	Guanine nucleotide exchange factor	U		2.43419	1	1	2	1	257	158	215	No EST	No EST
1132	CCCCTCT		up	up	59.m08831	AN4929.1	AO070338000014	Drebrins and related actin binding proteins	Z		0.214887	1	1	1	0	275	241	435	No EST	No EST
1132	CCCCTCT		up	up	69.m14907	AN5210.1	AO070337000270	Pyruvate kinase	G		2.53268	1	1	1	0	76	373	400	60	0
1132	CCCCTCT		up	up	62.m03227	AN6631.1	AO070326000083	Mitochondrial F1F0-ATP synthase, subunit d/ATP7	C		0.683767	1	1	1	0	32	197	209	35	0
1132	CCCCTCT		up	up	72.m19727	AN7350.1	AO070278000050	FOG: RRM domain				1	1	1	0	196	342	255	131	0
1132	CCCCTCT		up	up	71.m15815	AN7784.1	AO070286000028	GTPase-activating protein VRP				1	1	1	1	287	214	104	No EST	No EST
1132	CCCCTCT		up	up	54.m06486	AN9448.1	AO070334000061	predicted protein [Neurospora crassa]				1	1	1	0	537	28	18	No EST	No EST
1144	TGTACTAT		down	down	71.m15318	AN0043.1	AO070314000122	Phytoene/squalene synthetase	I		2.13889	1	7	1	0	96	25	24			No EST	No EST
1144	TGTACTAT		down	up	54.m06657	AN0418.1	AO070338000266	Urea transporter	E		0.0948056	1	1	1	0	444	420	289	No EST	No EST
1144	TGTACTAT		down	down	70.m15575	AN0943.1	AO070320000138	Mitochondrial F1F0-ATP synthase, subunit g/ATP20	C		0.470411	1	1	1	1	63	62	61			121	1
1144	TGTACTAT		down	down	70.m15221	AN1003.1	AO070312000031	Isocitrate dehydrogenase, alpha subunit	E		0.0948056	1	1	1	0	17	18	18			109	1
1144	TGTACTAT		down	down	69.m15651	AN1780.1	AO070324000015	Putative Xaa-Pro aminopeptidase	E		0.0948056	2	1	1	0	43	46	39			No EST	No EST
1144	TGTACTAT		down	down	59.m08453	AN2526.1	AO070220000001	Ketol-acid reductoisomerase	EH		0.094805583893341 1.08531454807399	1	1	1	1	42	41	37			105	1
1144	TGTACTAT		down	down	54.m06576	AN4036.1	AO070328000140	Predicted GTPase activator protein	T		2.30678	1	1	1	0	82	54	39			No EST	No EST
1144	TGTACTAT		down	down	58.m08016	AN4308.1	AO070207000013	Mitochondrial/chloroplast ribosomal protein L3	J		0.533563	1	1	2	1	33	26	30			91	1
1144	TGTACTAT		down	down	59.m08910	AN5008.1	AO070255000045	Cytochrome c oxidase, subunit VIb/COX12	C		0.470411	2	1	1	0	66	91	74			No EST	No EST
1144	TGTACTAT		down	up	72.m19104	AN6054.1	AO070340000200	Mitochondrial genome maintenance protein MGM101, mitochondrial precursor				1	1	2	0	181	66	56	8	0
1144	TGTACTAT		down	down	71.m15299	AN6842.1	AO070314000097	Phosphatidylethanolamine binding protein				1	1	1	1	64	33	58			No EST	No EST
1144	TGTACTAT		down	down	72.m19714	AN7361.1	AO070278000038	Glutamyl-tRNA synthetase (mitochondrial)	J		0.533563	1	1	1	0	241	49	26			70	1
1144	TGTACTAT		down	down	57.m05825	AN7508.1	AO070258000011	hypothetical protein [Neurospora crassa]				1	1	1	0	57	69	74			No EST	No EST
1183	AAACAAGGCA		up	up	71.m15415	AN0131.1	AO070321000122	hypothetical protein [Neurospora crassa]				2	1	1	1	114	3	3	No EST	No EST
1183	AAACAAGGCA		up	down	70.m15311	AN0704.1	AO070343000506	Uncharacterized protein SFI1 involved in G(2)-M transition	D		6.51469	1	1	1	0	57	165	37			No EST	No EST
1183	AAACAAGGCA		up	down	70.m15426	AN0824.1	AO070255000021	Short-chain acyl-CoA dehydrogenase	I		4.14391	1	2	1	0	81	153	169			304	1
1183	AAACAAGGCA		up	up	70.m15042	AN1175.1	AO070331000170	Nucleolar protein NOP52/RRP1	A		0.0678249	1	1	1	1	153	81	92	No EST	No EST
1183	AAACAAGGCA		up	down	70.m15003	AN1222.1	AO070331000222	S-adenosylmethionine synthetase	H		7.59861	1	1	1	1	62	69	59			360	1
1183	AAACAAGGCA		up	up	69.m15042	AN1728.1	AO070324000059	NADH-ubiquinone oxidoreductase, NDUFS3/30 kDa subunit	C		4.14074	1	1	1	1	167	91	83	40	0
1183	AAACAAGGCA		up	up	58.m07660	AN1851.1	AO070292000043	Chaperonin complex component, TCP-1 theta subunit (CCT8)	O		1.33812	1	1	1	1	51	18	22	No EST	No EST
1183	AAACAAGGCA		up	up	72.m19667	AN2173.1	AO070343000244	Predicted mitochondrial carrier protein	F		2.26409	1	1	1	1	240	107	86	181	1
1183	AAACAAGGCA		up	up	71.m15881	AN2247.1	AO070326000126	Myosin class II heavy chain	Z		0.725748	1	1	1	1	122	132	105	No EST	No EST
1183	AAACAAGGCA		up	up	71.m15945	AN2296.1	AO070295000077	RFX family transcription factor	K		0.455352	1	1	1	0	45	29	90	No EST	No EST
1183	AAACAAGGCA		up	up	59.m08499	AN2490.1	AO070312000130	Uncharacterized conserved protein, contains N-recognin-type Zn-finger				2	1	1	1	39	100	214	No EST	No EST
1183	AAACAAGGCA		up	up	59.m08916	AN3082.1	AO070224000004	mRNA cleavage and polyadenylation factor II complex, subunit CFT2 (CPSF subunit)	A		0.0678249	1	1	1	1	246	125	208	No EST	No EST
1183	AAACAAGGCA		up	up	54.m07043	AN4201.1	AO070231000023	Acyl-CoA synthetases (AMP-forming)/AMP-acid ligases II	IQ		4.14390833818174 3.89274281632885	2	2	1	0	64	95	25	No EST	No EST
1183	AAACAAGGCA		up	up	58.m07864	AN4460.1	AO070305000133	WD40-repeat-containing subunit of the 18S rRNA processing complex	A		0.0678249	1	1	1	1	158	250	220	No EST	No EST
1183	AAACAAGGCA		up	up	69.m15743	AN5452.1	AO070239000031	Splicing factor 3b, subunit 3	A		0.0678249	1	1	1	0	45	88	280	179	1
1183	AAACAAGGCA		up	up	69.m15436	AN5522.1	AO070341000367	predicted protein [Neurospora crassa]				1	1	1	0	260	5	59	No EST	No EST
1183	AAACAAGGCA		up	up	69.m14811	AN5786.1	AO070249000032	hypothetical protein [Neurospora crassa]				1	1	1	1	55	54	34	No EST	No EST
1183	AAACAAGGCA		up	up	65.m07278	AN6707.1	AO070339000137	DNA or RNA helicases of superfamily II	KL		0.45535230595195 3.75771934080085	1	1	1	1	79	70	72	No EST	No EST
1183	AAACAAGGCA		up	up	71.m16029	AN6921.1	AO070313000060	HSP90 co-chaperone p23	O		1.33812	1	1	1	0	228	65	81	71	1
1183	AAACAAGGCA		up	up	57.m05902	AN7441.1	AO070229000013	Actin-related protein - Arp4p/Act3p	Z		0.725748	1	1	1	0	52	45	161	144	1
1183	AAACAAGGCA		up	down	57.m05902	AN7441.1	AO070229000013	Actin-related protein - Arp4p/Act3p	Z		0.725748	1	1	1	0	273	70	102			453	1
1183	AAACAAGGCA		up	up	57.m05835	AN7504.1	AO070287000007	predicted protein [Neurospora crassa]				1	1	1	0	92	4	56	No EST	No EST
1183	AAACAAGGCA		up	up	57.m05828	AN7511.1	AO070258000009	beta (1-3) glucanosyltransferase Gel3p [Aspergillus fumigatus]				1	1	1	0	311	348	462	178	0
1183	AAACAAGGCA		up	up	71.m15820	AN7630.1	AO070294000040	Angio-associated migratory cell protein (contains WD40 repeats)				1	2	1	1	261	2	67	31	1
1183	AAACAAGGCA		up	up	53.m04181	AN7997.1	AO070322000048	RNA polymerase III transcription factor (TF)IIIC subunit	K		0.455352	1	1	1	0	230	265	177	No EST	No EST
1183	AAACAAGGCA		up	up	62.m03370	AN8699.1	AO070315000126	Ubiquitin-specific protease	O		1.33812	1	1	1	1	138	36	49	46	1
1230	TTACCCCTC		up	up	71.m15641	AN0241.1	AO070284000071	Cu2+/Zn2+ superoxide dismutase SOD1	P		2.40881	1	1	1	0	119	234	363	123	0
1230	TTACCCCTC		up	up	54.m06621	AN0436.1	AO070338000281	Predicted E3 ubiquitin ligase	O		1.57925	1	1	1	1	274	177	346	No EST	No EST
1230	TTACCCCTC		up	up	69.m15293	AN0554.1	AO070272000027	Aldehyde dehydrogenase	C		0.879129	1	1	1	0	147	77	107	17	0
1230	TTACCCCTC		up	up	70.m15312	AN0705.1	AO070343000504	Isoleucyl-tRNA synthetase	J		0.189269	1	1	1	0	70	78	87	36	0
1230	TTACCCCTC		up	up	57.m05745	AN1873.1	AO070341000189	Predicted phosphoglycerate mutase	G		1.13249	1	1	1	1	61	189	291	No EST	No EST
1230	TTACCCCTC		up	up	54.m06800	AN4218.1	AO070315000081	Translation elongation factor EF-1 alpha/Tu	J		0.189269	1	1	1	1	308	166	222	96	0
1230	TTACCCCTC		up	up	59.m09109	AN4862.1	AO070329000148	Ran GTPase-activating protein	AYT		2.81639696385209 0.923969068570605 3.23787140287071	1	1	1	0	1	205	227	No EST	No EST
1230	TTACCCCTC		up	up	72.m19122	AN6035.1	AO070340000253	L-alanine-DL-glutamate epimerase and related enzymes of enolase superfamily	M		1.41239	1	1	1	0	256	142	81	No EST	No EST
1230	TTACCCCTC		up	up	62.m03087	AN6499.1	AO070222000013	NAD-dependent malate dehydrogenase	C		0.879129	1	2	2	0	218	358	372	105	0
1230	TTACCCCTC		up	up	71.m15250	AN6889.1	AO070314000032	hypothetical protein [Neurospora crassa]				1	1	1	0	193	77	52	No EST	No EST
1230	TTACCCCTC		up	up	57.m05859	AN7479.1	AO070287000036	Asparaginyl-tRNA synthetase	J		0.189269	1	1	1	1	333	190	264	97	0
1230	TTACCCCTC		up	up	72.m19654	AN7620.1	AO070343000264	Uncharacterized conserved protein				1	1	1	0	140	364	253	No EST	No EST
1230	TTACCCCTC		up	up	53.m03905	AN8041.1	AO070330000005	Glyceraldehyde 3-phosphate dehydrogenase	G		1.13249	1	1	1	0	23	482	462	146	0
1230	TTACCCCTC		up	down	53.m03797	AN8182.1	AO070310000143	Septin family protein (P-loop GTPase)	DZU		6.45029020252672 6.69416221306746 4.69906365271842	1	1	1	1	95	103	93			349	1
1230	TTACCCCTC		up	up	70.m15333	AN9437.1	AO070343000483	Predicted E3 ubiquitin ligase	O		1.57925	1	1	1	0	6	155	166	No EST	No EST
1270	CTTTTCCGTCC		up	up	58.m07773	AN1697.1	AO070305000021	Splicing coactivator SRm160/300, subunit SRm160 (contains PWI domain)	A		4.87701	2	2	1	0	180	273	152	No EST	No EST
1270	CTTTTCCGTCC		up	up	55.m03061	AN1543.1	AO070339000311	Fumarate reductase, flavoprotein subunit	C		0.955164	1	1	1	0	105	273	225	43	0
1270	CTTTTCCGTCC		up	up	59.m09440	AN2999.1	AO070337000118	NADP-dependent isocitrate dehydrogenase	C		0.955164	1	1	1	0	506	63	73	No EST	No EST
1270	CTTTTCCGTCC		up	up	62.m03114	AN6525.1	AO070270000024	Glyoxylate/hydroxypyruvate reductase (D-isomer-specific 2-hydroxy acid dehydrogenase superfamily)	C		0.955164	1	1	1	0	144	61	41	No EST	No EST
1270	CTTTTCCGTCC		up	up	65.m07283	AN6694.1	AO070339000132	DNA replication checkpoint protein CHL12/CTF18	DL		4.39644867756451 4.68037978614166	1	1	1	1	267	201	473	No EST	No EST
1270	CTTTTCCGTCC		up	up	58.m07882	AN4443.1	AO070273000010	Methionine synthase II (cobalamin-independent)	E		3.08904	3	3	2	0	29	197	230	66	0
1270	CTTTTCCGTCC		up	up	59.m09156	AN4819.1	AO070327000168	Glutamine synthetase	E		3.08904	2	1	1	0	18	235	159	No EST	No EST
1270	CTTTTCCGTCC		up	up	54.m06742	AN4102.1	AO070342000101	Beta-glucosidase-related glycosidases	G		3.13054	1	1	1	0	86	113	65	No EST	No EST
1270	CTTTTCCGTCC		up	up	69.m14907	AN5210.1	AO070337000270	Pyruvate kinase	G		3.13054	1	1	2	1	209	341	281	60	0
1270	CTTTTCCGTCC		up	down	58.m07659	AN2057.1	AO070292000042	Mitochondrial/chloroplast ribosomal protein L12	J		3.80566	1	1	1	1	140	122	160			334	1
1270	CTTTTCCGTCC		up	up	70.m15636	AN0640.1	AO070318000141	Sphingolipid hydroxylase	I		2.73217	1	1	2	0	201	37	36	No EST	No EST
1270	CTTTTCCGTCC		up	up	57.m05768	AN2068.1	AO070341000217	Vigilin	I		2.73217	1	2	1	0	477	18	18	No EST	No EST
1270	CTTTTCCGTCC		up	up	54.m06684	AN2747.1	AO070338000224	RNA polymerase subunit K	K		4.88827	1	2	1	1	177	10	10	No EST	No EST
1270	CTTTTCCGTCC		up	up	70.m15462	AN0866.1	AO070320000017	Molecular chaperones HSP70/HSC70, HSP70 superfamily	O		3.58744	2	1	3	0	60	365	258	No EST	No EST
1270	CTTTTCCGTCC		up	up	59.m09263	AN2761.1	AO070327000023	Ubiquitin-protein ligase	O		3.58744	2	1	1	0	258	284	240	144	0
1270	CTTTTCCGTCC		up	up	72.m19699	AN2142.1	AO070343000188	Karyopherin (importin) alpha	U		0.292508	4	1	1	0	66	46	48	No EST	No EST
1270	CTTTTCCGTCC		up	down	59.m08643	AN3101.1	AO070334000142	Sensory transduction histidine kinase	T		3.42184	1	1	1	0	188	251	179			No EST	No EST
1270	CTTTTCCGTCC		up	down	59.m08561	AN3171.1	AO070256000019	Ras-related small GTPase, Rho type				1	1	1	1	142	140	161			No EST	No EST
1270	CTTTTCCGTCC		up	up	62.m03223	AN6627.1	AO070326000078	Signal recognition particle receptor, alpha subunit	U		0.292508	1	1	1	0	96	4	19	No EST	No EST
1270	CTTTTCCGTCC		up	up	71.m15957	AN8825.1	AO070271000056	Clathrin coat binding protein/Huntingtin interacting protein HIP1, involved in regulation of endocytosis	U		0.292508	2	1	1	0	237	232	243	No EST	No EST
1270	CTTTTCCGTCC		up	up	70.m15808	AN0926.1	AO070320000110	Nuclear transport receptor Karyopherin-beta2/Transportin (importin beta superfamily)	YU		2.25138065907798 0.292507935544752	1	1	1	0	115	296	105	No EST	No EST
1270	CTTTTCCGTCC		up	up	59.m09279	AN3425.1	AO070327000006	Interferon-related protein PC4 like	Z		1.11025	1	1	1	0	315	14	295	No EST	No EST
1270	CTTTTCCGTCC		up	up	71.m15259	AN6875.1	AO070314000048	Kinesin-like protein	Z		1.11025	1	1	1	0	96	213	361	No EST	No EST
1270	CTTTTCCGTCC		up	down	62.m03096	AN6510.1	AO070270000003	Translocase of outer mitochondrial membrane complex, subunit TOM40	U		0.292508	1	1	1	0	120	100	88			463	1
1270	CTTTTCCGTCC		up	up	70.m14839	AN1382.1	AO070243000014	hypothetical protein [Neurospora crassa]				1	1	1	0	191	14	135	No EST	No EST
1270	CTTTTCCGTCC		up	up	55.m03078	AN1562.1	AO070339000292	predicted protein [Neurospora crassa]				1	2	1	0	179	445	44	No EST	No EST
1270	CTTTTCCGTCC		up	up	58.m07667	AN1844.1	AO070292000063	palFp [Emericella nidulans]				1	1	2	0	51	256	52	No EST	No EST
1270	CTTTTCCGTCC		up	up	58.m07644	AN2056.1	AO070292000026	Uncharacterized conserved protein				1	1	1	0	47	336	279	No EST	No EST
1270	CTTTTCCGTCC		up	up	71.m15938	AN2290.1	AO070295000069	FOG: Zn-finger				1	1	1	0	530	21	317	No EST	No EST
1270	CTTTTCCGTCC		up	up	62.m03343	AN8723.1	AO070315000151	predicted protein [Neurospora crassa]				1	1	3	0	143	273	146	123	0
1270	CTTTTCCGTCC		up	down	62.m03402	AN9500.1	AO070205000004	Cyclin				2	1	2	1	156	189	174			No EST	No EST
1291	TGAGTCAG	yAP1 (STGACTMA) [yeast_motifs_all];	up	up	54.m06468	AN0275.1	AO070334000082	Cystine transporter Cystinosin	E		0.0217743	1	1	1	0	210	58	81	No EST	No EST
1291	TGAGTCAG	yAP1 (STGACTMA) [yeast_motifs_all];	up	up	69.m15311	AN0495.1	AO070226000029	Formyltetrahydrofolate hydrolase	F		1.59067	1	1	1	0	136	72	100	43	0
1291	TGAGTCAG	yAP1 (STGACTMA) [yeast_motifs_all];	up	up	69.m15260	AN0589.1	AO070280000011	RNA Helicase	A		0.252952	1	1	1	1	122	30	17	16	0
1291	TGAGTCAG	yAP1 (STGACTMA) [yeast_motifs_all];	up	up	70.m15350	AN0717.1	AO070343000449	Histidinol phosphate aminotransferase	E		0.0217743	1	1	1	0	113	30	123	No EST	No EST
1291	TGAGTCAG	yAP1 (STGACTMA) [yeast_motifs_all];	up	up	70.m15158	AN1084.1	AO070285000084	Mitochondrial translation elongation factor Tu	J		0.0154573	1	1	1	1	128	118	125	52	0
1291	TGAGTCAG	yAP1 (STGACTMA) [yeast_motifs_all];	up	up	70.m14959	AN1260.1	AO070214000005	mRNA splicing factor PRP31	A		0.252952	1	1	1	0	122	67	83	40	0
1291	TGAGTCAG	yAP1 (STGACTMA) [yeast_motifs_all];	up	up	58.m07569	AN1964.1	AO070301000045	40S ribosomal protein S6	J		0.0154573	1	2	1	0	129	288	336	58	0
1291	TGAGTCAG	yAP1 (STGACTMA) [yeast_motifs_all];	up	up	57.m05779	AN2080.1	AO070341000233	Polypeptide release factor 3	J		0.0154573	1	1	1	1	122	105	79	55	0
1291	TGAGTCAG	yAP1 (STGACTMA) [yeast_motifs_all];	up	up	71.m15904	AN2263.1	AO070295000026	Predicted GTP-binding protein MMR1				1	1	1	1	212	48	64	No EST	No EST
1291	TGAGTCAG	yAP1 (STGACTMA) [yeast_motifs_all];	up	up	58.m08964	AN3851.1	AO070305000089	Putative N2,N2-dimethylguanosine tRNA methyltransferase	A		0.252952	1	1	1	1	113	55	69	No EST	No EST
1291	TGAGTCAG	yAP1 (STGACTMA) [yeast_motifs_all];	up	up	58.m07895	AN4430.1	AO070273000027	Acetolactate synthase, small subunit	E		0.0217743	1	1	1	1	146	136	153	38	0
1291	TGAGTCAG	yAP1 (STGACTMA) [yeast_motifs_all];	up	up	57.m05643	AN4488.1	AO070311000040	predicted protein [Neurospora crassa]				1	1	1	0	519	60	13	No EST	No EST
1291	TGAGTCAG	yAP1 (STGACTMA) [yeast_motifs_all];	up	up	57.m05569	AN4557.1	AO070321000171	AAA+-type ATPase containing the peptidase M41 domain	O		2.82992	1	1	1	1	219	222	149	148	0
1291	TGAGTCAG	yAP1 (STGACTMA) [yeast_motifs_all];	up	down	59.m09189	AN4792.1	AO070329000054	Proteins containing the FAD binding domain	C		3.00218	1	1	1	1	254	126	213			No EST	No EST
1291	TGAGTCAG	yAP1 (STGACTMA) [yeast_motifs_all];	up	up	69.m15491	AN5443.1	AO070333000106	Predicted exosome subunit	J		0.0154573	1	2	2	0	186	81	88	No EST	No EST
1291	TGAGTCAG	yAP1 (STGACTMA) [yeast_motifs_all];	up	up	72.m19170	AN5954.1	AO070340000308	RNA polymerase I-associated factor - PAF67	JK		0.0154573118753153 2.95574128653908	1	1	1	1	208	293	353	No EST	No EST
1291	TGAGTCAG	yAP1 (STGACTMA) [yeast_motifs_all];	up	up	72.m19489	AN6371.1	AO070279000075	hypothetical protein [Neurospora crassa]				1	1	1	1	393	118	57	308	1
1291	TGAGTCAG	yAP1 (STGACTMA) [yeast_motifs_all];	up	up	69.m15238	AN6390.1	AO070343000155	Homogentisate 1,2-dioxygenase	E		0.0217743	1	2	2	1	116	88	95	No EST	No EST
1291	TGAGTCAG	yAP1 (STGACTMA) [yeast_motifs_all];	up	up	57.m05914	AN7430.1	AO070229000001	Glutamine amidotransferase/cyclase	E		0.0217743	1	1	1	1	212	96	45	45	0
1291	TGAGTCAG	yAP1 (STGACTMA) [yeast_motifs_all];	up	up	72.m19584	AN7565.1	AO070343000408					1	1	1	1	90	196	70	No EST	No EST
1291	TGAGTCAG	yAP1 (STGACTMA) [yeast_motifs_all];	up	up	71.m15766	AN7736.1	AO070325000157	Ankyrin repeat protein				2	2	1	0	180	312	221	No EST	No EST
1291	TGAGTCAG	yAP1 (STGACTMA) [yeast_motifs_all];	up	up	52.m04030	AN9403.1	AO070274000014	Pyruvate dehydrogenase E1, beta subunit	C		3.00218	1	1	1	1	198	185	89	101	0
1407	CCCGTGACT		up	up	54.m06978	AN0304.1	AO070334000034	Fe2+/Zn2+ regulated transporter	P		4.83841	1	1	1	0	377	94	49	116	1
1407	CCCGTGACT		up	up	70.m15484	AN0881.1	AO070320000049	Alkylated DNA repair protein	L		1.00359	1	2	1	0	18	107	41	No EST	No EST
1407	CCCGTGACT		up	up	70.m15630	AN0989.1	AO070318000148	SWI-SNF chromatin-remodeling complex protein	B		4.3239	1	2	1	1	311	16	17	No EST	No EST
1407	CCCGTGACT		up	down	70.m15172	AN1061.1	AO070218000005	Amino acid transporters	E		3.52266	1	1	1	0	160	119	258			No EST	No EST
1407	CCCGTGACT		up	up	70.m15021	AN1198.1	AO070331000203	Aminomethyl transferase	E		3.52266	1	1	1	1	103	242	216	No EST	No EST
1407	CCCGTGACT		up	up	70.m14989	AN1230.1	AO070331000242	Inner membrane protein required for assembly of the F0 sector of ATP synthase	O		0.405488	1	1	1	1	137	30	21	No EST	No EST
1407	CCCGTGACT		up	down	70.m14905	AN1326.1	AO070303000090	Protein kinase				1	1	1	0	222	267	207			130	0
1407	CCCGTGACT		up	up	55.m02913	AN1405.1	AO070242000008					1	1	1	0	130	423	408	No EST	No EST
1407	CCCGTGACT		up	up	55.m02950	AN1448.1	AO070302000005	Translation initiation factor 4F, ribosome/mRNA-bridging subunit (eIF-4G)	J	1	0.000699383	1	1	1	0	180	78	60	No EST	No EST
1407	CCCGTGACT		up	up	58.m07665	AN1846.1	AO070292000059					1	1	1	0	274	249	328	No EST	No EST
1407	CCCGTGACT		up	up	58.m08869	AN1933.1	AO070342000200	Predicted membrane protein				1	2	1	0	288	30	237	391	1
1407	CCCGTGACT		up	up	58.m08945	AN1981.1	AO070301000066	Protein geranylgeranyltransferase type II, alpha subunit	O		0.405488	1	1	1	0	134	48	85	No EST	No EST
1407	CCCGTGACT		up	up	58.m07590	AN1984.1	AO070301000069	Transcription initiation factor TFIID, subunit BDF1 and related bromodomain proteins	K		0.629803	1	2	1	0	347	152	188	No EST	No EST
1407	CCCGTGACT		up	up	71.m15940	AN2292.1	AO070295000071	Protein required for cell viability; Yil019wp [Saccharomyces cerevisiae]				1	1	1	0	51	28	30	No EST	No EST
1407	CCCGTGACT		up	up	54.m06686	AN2745.1	AO070338000226	Acetyltransferase, (GNAT) family				1	1	1	1	138	128	137	No EST	No EST
1407	CCCGTGACT		up	up	59.m08755	AN2904.1	AO070338000101	26S proteasome regulatory complex, ATPase RPT3	O		0.405488	1	1	1	0	201	317	400	95	0
1407	CCCGTGACT		up	up	59.m08756	AN2905.1	AO070338000100	DNA-binding proteins Bright/BRCAA1/RBP1 and related proteins containing BRIGHT domain	K		0.629803	1	1	1	0	468	26	34	No EST	No EST
1407	CCCGTGACT		up	up	59.m09022	AN2992.1	AO070337000126	Translation initiation factor 2, beta subunit (eIF-2beta)	J	1	0.000699383	1	1	1	0	171	18	25	83	1
1407	CCCGTGACT		up	up	67.m02926	AN3217.1	AO070330000062	putative transcriptional activator with fungal binuclear cluster domain [Schizosaccharomyces pombe]				1	1	1	0	97	82	109	70	0
1407	CCCGTGACT		up	up	58.m07438	AN3660.1	AO070342000025	Methyltransferase-like protein				1	1	1	1	214	132	178	No EST	No EST
1407	CCCGTGACT		up	up	54.m06715	AN4073.1	AO070342000062	40S ribosomal protein S12	J	1	0.000699383	1	2	1	0	178	29	57	No EST	No EST
1407	CCCGTGACT		up	up	58.m07362	AN4163.1	AO070342000193	G protein beta subunit-like protein	T		3.62316	1	2	1	1	190	12	173	77	1
1407	CCCGTGACT		up	up	58.m07955	AN4377.1	AO070261000012	predicted protein [Neurospora crassa]				1	2	1	0	185	49	105	No EST	No EST
1407	CCCGTGACT		up	up	57.m05585	AN4536.1	AO070321000153	Serine/threonine protein kinase	TKL		3.62315832294026 0.629803315005952 1.00359496612816	1	1	1	1	417	33	7	No EST	No EST
1407	CCCGTGACT		up	up	59.m09460	AN4788.1	AO070329000059	RNA splicing factor - Slu7p	A		1.53606	1	1	1	0	25	63	82	No EST	No EST
1407	CCCGTGACT		up	up	59.m08819	AN4916.1	AO070338000027	40S ribosomal protein S7	J	1	0.000699383	1	1	1	0	228	43	140	82	1
1407	CCCGTGACT		up	down	63.m00628	AN5049.1	AO070338000189	Mitochondrial Fe2+ transporter MMT1 and related transporters (cation diffusion facilitator superfamily)	P		4.83841	1	1	1	0	258	81	128			No EST	No EST
1407	CCCGTGACT		up	up	58.m07493	AN5569.1	AO070328000037	RNA polymerase II transcription initiation/nucleotide excision repair factor TFIIH, subunit TFB1	KL		0.629803315005952 1.00359496612816	1	1	1	0	205	109	182	No EST	No EST
1407	CCCGTGACT		up	up	65.m07407	AN5681.1	AO070309000096	Predicted E3 ubiquitin ligase, integral peroxisomal membrane protein	O		0.405488	2	1	1	1	43	83	89	52	0
1407	CCCGTGACT		up	up	54.m06834	AN5715.1	AO070324000138	40s ribosomal protein S26	J	1	0.000699383	1	1	1	1	173	189	60	No EST	No EST
1407	CCCGTGACT		up	up	54.m06840	AN5719.1	AO070324000131	60s acidic ribosomal protein P1	J	1	0.000699383	1	1	1	1	204	29	2	101	1
1407	CCCGTGACT		up	up	69.m14856	AN5741.1	AO070341000018	predicted protein [Neurospora crassa]				1	1	1	0	92	360	295	No EST	No EST
1407	CCCGTGACT		up	up	72.m19080	AN6089.1	AO070340000143	Mitochondrial chaperonin, Cpn60/Hsp60p	O		0.405488	1	1	1	0	241	77	77	140	1
1407	CCCGTGACT		up	up	72.m19412	AN6245.1	AO070304000099	predicted protein [Neurospora crassa]				1	1	1	0	134	107	310	No EST	No EST
1407	CCCGTGACT		up	up	62.m03227	AN6631.1	AO070326000083	Mitochondrial F1F0-ATP synthase, subunit d/ATP7	C		4.0651	1	1	1	0	106	103	127	35	0
1407	CCCGTGACT		up	up	71.m15298	AN6841.1	AO070314000098	Mitochondrial inner membrane protease, subunit IMP1	O		0.405488	1	1	1	0	96	17	26	No EST	No EST
1407	CCCGTGACT		up	up	57.m05838	AN7501.1	AO070287000012	LisH motif-containing protein	Z		4.7891	1	1	1	0	235	131	29	No EST	No EST
1407	CCCGTGACT		up	up	62.m03491	AN8704.1	AO070315000132	60s ribosomal protein L24	J	1	0.000699383	1	1	1	1	146	105	113	73	0
1407	CCCGTGACT		up	up	62.m03454	AN8722.1	AO070315000150	ATP-dependent RNA helicase	A		1.53606	1	1	1	1	281	173	197	186	1
1407	CCCGTGACT		up	up	71.m15986	AN8851.1	AO070271000025	Pseudouridine synthase	J	1	0.000699383	1	1	1	0	209	73	36	92	1
1407	CCCGTGACT		up	up	56.m02291	AN8880.1	AO070293000010	Sortilin and related receptors				1	1	1	0	287	49	83	No EST	No EST
1407	CCCGTGACT		up	up	52.m03843	AN9360.1	AO070315000040	Protein containing a U1-type Zn-finger and implicated in RNA splicing or processing	A		1.53606	1	1	1	0	199	31	218	No EST	No EST
1407	CCCGTGACT		up	up	72.m19967	AN9468.1	AO070340000317	40S ribosomal protein S16	J	1	0.000699383	1	1	1	0	42	44	58	73	1
1426	CCCGAGGT		up	up	71.m15403	AN0122.1	AO070311000090	ATP-dependent Lon protease, bacterial type	O		0.877363	1	1	1	1	218	92	61	78	0
1426	CCCGAGGT		up	up	54.m06650	AN0426.1	AO070338000276	Peroxisomal long-chain acyl-CoA transporter, ABC superfamily	I		0.0109072	1	1	1	1	325	95	166	No EST	No EST
1426	CCCGAGGT		up	down	70.m15270	AN0667.1	AO070343000553	Mannose-6-phosphate isomerase	G		2.40581	1	1	1	0	175	130	132			17	0
1426	CCCGAGGT		up	up	70.m15622	AN0981.1	AO070318000167	Long chain fatty acid elongase	I		0.0109072	1	1	1	0	432	34	29	No EST	No EST
1426	CCCGAGGT		up	up	71.m15534	AN2332.1	AO070323000014	Succinate dehydrogenase, Fe-S protein subunit	C	1	0.000910551	1	1	1	1	234	260	324	138	0
1426	CCCGAGGT		up	up	59.m09097	AN2916.1	AO070329000155	Succinate dehydrogenase, flavoprotein subunit	C	1	0.000910551	1	1	1	1	139	158	175	No EST	No EST
1426	CCCGAGGT		up	up	59.m09078	AN2925.1	AO070337000214	Peroxisome assembly factor 2 containing the AAA+-type ATPase domain	O		0.877363	1	1	2	1	284	170	147	No EST	No EST
1426	CCCGAGGT		up	up	59.m09056	AN2938.1	AO070337000168	Peroxisomal NUDIX hydrolase	L		1.36642	1	1	1	1	117	133	205	No EST	No EST
1426	CCCGAGGT		up	up	59.m08411	AN3191.1	AO070338000263	Esterase/lipase	I		0.0109072	1	1	1	0	178	174	44	No EST	No EST
1426	CCCGAGGT		up	up	54.m06786	AN4230.1	AO070234000016	Predicted L-carnitine dehydratase/alpha-methylacyl-CoA racemase	I		0.0109072	1	1	1	1	182	35	70	No EST	No EST
1426	CCCGAGGT		up	up	65.m07435	AN4261.1	AO070277000030					1	1	1	0	109	99	91	No EST	No EST
1426	CCCGAGGT		up	up	54.m07051	AN5113.1	AO070291000066	Peroxisomal biogenesis protein (peroxin 16)	U		1.7387	1	0	1	0	190	0	4	No EST	No EST
1426	CCCGAGGT		up	up	72.m18955	AN5828.1	AO070260000018	Cytochrome b5	C	1	0.000910551	1	1	1	0	195	63	62	No EST	No EST
1426	CCCGAGGT		up	up	72.m19901	AN6167.1	AO070343000365	NADH:flavin oxidoreductases, Old Yellow Enzyme family	C	1	0.000910551	1	1	1	0	136	242	165	No EST	No EST
1426	CCCGAGGT		up	up	56.m02337	AN9014.1	AO070321000049	Glycolate oxidase	C	1	0.000910551	0	1	1	0	177	15	89	No EST	No EST
1453	TTTGGTCTT		down	down	70.m14971	AN1256.1	AO070223000013	RNAse L inhibitor, ABC superfamily	A		0.529626	1	1	1	0	283	228	123			No EST	No EST
1453	TTTGGTCTT		down	down	58.m07718	AN1639.1	AO070299000037	Thioredoxin-like protein	O		3.3701	1	1	1	1	232	261	222			No EST	No EST
1453	TTTGGTCTT		down	up	58.m08938	AN1854.1	AO070292000029	hypothetical protein [Schizosaccharomyces pombe]				1	1	1	0	77	86	140	No EST	No EST
1453	TTTGGTCTT		down	down	54.m06676	AN2734.1	AO070338000217	60S acidic ribosomal protein P0	J		0.785536	1	1	1	1	277	255	270			151	0
1453	TTTGGTCTT		down	down	59.m09039	AN2973.1	AO070337000148	SNF2 family DNA-dependent ATPase	B		0.111004	1	1	1	0	57	25	39			No EST	No EST
1453	TTTGGTCTT		down	down	59.m09009	AN3005.1	AO070337000107	Protein involved in vacuole import and degradation	U		0.766372	1	2	2	0	173	10	83			241	1
1453	TTTGGTCTT		down	down	59.m08502	AN3188.1	AO070312000135	Phosphatidylserine decarboxylase	I		2.87104	1	1	2	1	403	392	229			182	0
1453	TTTGGTCTT		down	up	58.m07411	AN3624.1	AO070342000127	Cation transport ATPase	P		6.44884	1	1	1	0	165	60	353	No EST	No EST
1453	TTTGGTCTT		down	down	54.m06840	AN5719.1	AO070324000131	60s acidic ribosomal protein P1	J		0.785536	1	1	1	1	103	133	105			438	1
1453	TTTGGTCTT		down	down	72.m19026	AN6138.1	AO070340000064	DNA-binding cell division cycle control protein	D		1.95633	1	1	1	0	109	45	104			No EST	No EST
1453	TTTGGTCTT		down	up	62.m03226	AN6630.1	AO070326000082	Transcription factor containing NAC and TS-N domains	K		2.70266	1	1	1	1	236	101	174	276	1
1453	TTTGGTCTT		down	down	71.m15272	AN6859.1	AO070314000076	RNA polymerase II C-terminal domain-binding protein RA4, contains RPR and RRM domains	AK		0.529625643536033 2.70265763160642	1	1	1	0	175	123	168			No EST	No EST
1453	TTTGGTCTT		down	down	57.m05468	AN7687.1	AO070325000085	Translocase of outer mitochondrial membrane complex, subunit TOM70/TOM72	U		0.766372	1	1	1	0	353	155	296			No EST	No EST
1453	TTTGGTCTT		down	down	53.m04190	AN8042.1	AO070330000004	Histone deacetylase complex, catalytic component HDA1	B		0.111004	1	1	1	0	26	326	277			137	0
1453	TTTGGTCTT		down	up	62.m03394	AN8676.1	AO070315000096	Regulator of arginine metabolism and related MADS box-containing transcription factors	K		2.70266	1	1	1	1	131	355	423	157	0
1453	TTTGGTCTT		down	down	52.m03971	AN9297.1	AO070279000023	Myosin-crossreactive antigen				1	1	1	0	18	66	128			194	1
1475	TTTCCTTT		down	down	71.m15325	AN0056.1	AO070314000131	hypothetical protein [Neurospora crassa]				1	1	2	0	278	137	198			No EST	No EST
1475	TTTCCTTT		down	down	71.m16046	AN0077.1	AO070311000138	Iron/ascorbate family oxidoreductases	Q		5.8963	1	2	1	1	302	206	339			No EST	No EST
1475	TTTCCTTT		down	down	71.m15404	AN0123.1	AO070311000089	Predicted mitochondrial ribosomal protein L23	J		2.88265	1	1	1	0	23	55	22			No EST	No EST
1475	TTTCCTTT		down	up	71.m15450	AN0176.1	AO070321000065	GATA-4/5/6 transcription factors	K		2.06254	2	1	1	0	208	223	259	No EST	No EST
1475	TTTCCTTT		down	up	71.m16095	AN0226.1	AO070284000066	Ubiquitin-protein ligase	O		2.17463	1	1	3	0	141	405	37	119	0
1475	TTTCCTTT		down	up	54.m06965	AN0261.1	AO070334000097	Vesicle coat complex COPII, subunit SEC23	U		2.8058	1	2	1	0	319	32	25	No EST	No EST
1475	TTTCCTTT		down	down	54.m06503	AN0279.1	AO070334000092	Transcription factor, Myb superfamily	K		2.06254	2	1	2	0	36	112	146			No EST	No EST
1475	TTTCCTTT		down	down	54.m06398	AN0356.1	AO070318000032	predicted protein [Neurospora crassa]				1	1	1	0	196	189	242			75	0
1475	TTTCCTTT		down	down	54.m06391	AN0360.1	AO070318000038	RNA polymerase I transcription factor UAF	K		2.06254	1	1	2	0	91	142	103			393	1
1475	TTTCCTTT		down	down	69.m15281	AN0565.1	AO070272000043	Multifunctional pyrimidine synthesis protein CAD (includes carbamoyl-phophate synthetase, aspartate transcarbamylase, and glutamine amidotransferase)				4	3	5	1	319	362	191			No EST	No EST
1475	TTTCCTTT		down	down	69.m15273	AN0573.1	AO070272000052	Ypt/Rab GTPase activating protein	U		2.8058	2	1	2	0	107	18	27			No EST	No EST
1475	TTTCCTTT		down	down	70.m15259	AN0655.1	AO070343000571	hypothetical protein [Neurospora crassa]				2	2	2	0	165	113	77			No EST	No EST
1475	TTTCCTTT		down	down	70.m15280	AN0676.1	AO070343000539	Gamma tubulin	Z		0.0870047	1	2	1	1	46	18	404			98	1
1475	TTTCCTTT		down	down	70.m15319	AN0734.1	AO070343000495	Histone H4	B		7.99412	4	2	1	1	11	85	158			342	1
1475	TTTCCTTT		down	up	70.m15369	AN0766.1	AO070316000078	hypothetical protein [Novosphingobium aromaticivorans]				1	1	4	0	54	355	41	377	1
1475	TTTCCTTT		down	up	70.m15460	AN0867.1	AO070320000018	hypothetical protein [Neurospora crassa]				2	2	2	1	87	130	137	No EST	No EST
1475	TTTCCTTT		down	up	70.m15477	AN0874.1	AO070320000033	Poly(A) polymerase and related nucleotidyltransferases	A		6.2612	1	1	1	0	180	115	172	No EST	No EST
1475	TTTCCTTT		down	down	70.m15808	AN0926.1	AO070320000110	Nuclear transport receptor Karyopherin-beta2/Transportin (importin beta superfamily)	YU		6.25086400985864 2.80580375590618	1	2	2	0	49	99	103			No EST	No EST
1475	TTTCCTTT		down	up	70.m15143	AN1089.1	AO070285000061	Thioredoxin binding protein TBP-2/VDUP1				4	3	3	0	136	5	61	No EST	No EST
1475	TTTCCTTT		down	down	70.m15054	AN1166.1	AO070331000160	60s ribosomal protein L6	J		2.88265	2	1	1	0	263	274	261			No EST	No EST
1475	TTTCCTTT		down	up	70.m15031	AN1190.1	AO070331000190	Nuclear pore complex, rNup107 component (sc Nup84)	YU		6.25086400985864 2.80580375590618	1	1	2	0	300	197	196	No EST	No EST
1475	TTTCCTTT		down	down	70.m15003	AN1222.1	AO070331000222	S-adenosylmethionine synthetase	H		8.15253	2	1	1	1	60	129	57			360	1
1475	TTTCCTTT		down	up	70.m14985	AN1233.1	AO070331000247	Nucleolar GTPase/ATPase p130	Y		6.25086	2	1	2	0	312	164	99	No EST	No EST
1475	TTTCCTTT		down	down	55.m03042	AN1523.1	AO070334000241	F0F1-type ATP synthase, alpha subunit	C		2.50974	1	1	2	1	390	372	99			403	1
1475	TTTCCTTT		down	down	58.m07708	AN1613.1	AO070299000064					1	1	1	0	114	138	278			No EST	No EST
1475	TTTCCTTT		down	down	58.m07754	AN1677.1	AO070299000001	Dehydrogenases with different specificities (related to short-chain alcohol dehydrogenases)	IQ		5.0794773239054 5.89629512247155	1	1	1	0	43	125	23			240	1
1475	TTTCCTTT		down	down	69.m14936	AN1918.1	AO070341000122	Phosphoenolpyruvate carboxykinase (ATP)	C		2.50974	4	1	4	1	14	19	20			195	1
1475	TTTCCTTT		down	down	58.m07346	AN1950.1	AO070342000218	conserved hypothetical protein [Neurospora crassa]				2	2	1	0	104	216	203			496	1
1475	TTTCCTTT		down	down	58.m07606	AN1997.1	AO070301000092	FOG: Zn-finger				2	2	2	1	110	148	111			No EST	No EST
1475	TTTCCTTT		down	down	58.m07617	AN2008.1	AO070179000004	Predicted hydrolase (HAD superfamily)				2	1	2	1	68	142	185			No EST	No EST
1475	TTTCCTTT		down	up	57.m05760	AN2062.1	AO070341000205	Molecular chaperones GRP78/BiP/KAR2, HSP70 superfamily	O		2.17463	1	1	1	0	165	197	188	173	0
1475	TTTCCTTT		down	up	57.m05773	AN2070.1	AO070341000226	PHD finger protein AF10				2	1	1	0	156	129	168	No EST	No EST
1475	TTTCCTTT		down	up	69.m15160	AN2120.1	AO070332000051	Karyopherin (importin) beta 3	YU		6.25086400985864 2.80580375590618	1	1	3	0	193	252	187	No EST	No EST
1475	TTTCCTTT		down	down	72.m19712	AN2129.1	AO070278000034	COP9 signalosome, subunit CSN5	OT		2.17463453024612 0.696605565444995	1	2	1	0	266	288	285			No EST	No EST
1475	TTTCCTTT		down	down	71.m15519	AN2315.1	AO070323000037	F0F1-type ATP synthase, beta subunit	C		2.50974	3	2	3	1	26	10	24			307	1
1475	TTTCCTTT		down	up	59.m09396	AN2911.1	AO070338000094	Transcriptional activator FOSB/c-Fos and related bZIP transcription factors	K		2.06254	1	1	1	0	235	482	298	No EST	No EST
1475	TTTCCTTT		down	down	59.m09068	AN2927.1	AO070337000182	Dual specificity; serine/threonine and tyrosine kinase	D		2.03252	1	2	1	0	119	40	129			No EST	No EST
1475	TTTCCTTT		down	down	59.m08612	AN3124.1	AO070303000023	Kinesin-like protein	Z		0.0870047	1	1	2	0	38	4	69			146	1
1475	TTTCCTTT		down	down	59.m08573	AN3181.1	AO070256000007	Tyrosine kinase specific for activated (GTP-bound) p21cdc42Hs	T		0.696606	1	2	1	0	180	20	102			No EST	No EST
1475	TTTCCTTT		down	up	59.m09479	AN3445.1	AO070265000021	Extracellular protein SEL-1 and related proteins	MOT		10.7749188504509 2.17463453024612 0.696605565444995	1	2	2	0	29	233	262	No EST	No EST
1475	TTTCCTTT		down	up	69.m14984	AN3940.1	AO070341000052	Predicted alpha-helical protein, potentially involved in replication/repair	L		4.77078	2	1	1	1	131	228	232	No EST	No EST
1475	TTTCCTTT		down	down	69.m14975	AN3946.1	AO070341000066	Mitotic checkpoint serine/threonine protein kinase	D		2.03252	1	1	2	0	91	172	313			No EST	No EST
1475	TTTCCTTT		down	down	54.m06707	AN4064.1	AO070342000052	Mitochondrial ADP/ATP carrier proteins	C		2.50974	1	1	1	0	202	176	180			No EST	No EST
1475	TTTCCTTT		down	down	54.m06733	AN4088.1	AO070342000091	predicted protein [Neurospora crassa]				1	2	1	0	249	283	509			No EST	No EST
1475	TTTCCTTT		down	down	54.m06794	AN4223.1	AO070234000027	Cytoskeleton-associated protein and related proteins	Z		0.0870047	3	1	1	1	167	120	135			247	1
1475	TTTCCTTT		down	down	58.m07927	AN4394.1	AO070261000039					2	2	2	0	284	109	278			No EST	No EST
1475	TTTCCTTT		down	up	57.m05647	AN4484.1	AO070311000033	PHD finger protein				3	1	1	0	263	460	184	No EST	No EST
1475	TTTCCTTT		down	down	71.m15687	AN4699.1	AO070329000175	predicted protein [Neurospora crassa]				1	1	1	0	381	320	273			No EST	No EST
1475	TTTCCTTT		down	up	59.m09466	AN4859.1	AO070329000143	Plasma membrane H+-transporting ATPase	P		5.01867	4	1	1	1	253	164	166	103	0
1475	TTTCCTTT		down	down	59.m08868	AN4965.1	AO070288000030	Negative regulator of transcription	K		2.06254	2	1	2	0	177	273	324			No EST	No EST
1475	TTTCCTTT		down	down	59.m09404	AN4978.1	AO070288000045	Alternative splicing factor SRp55/B52/SRp75 (RRM superfamily)	A		6.2612	1	1	1	0	89	119	280			No EST	No EST
1475	TTTCCTTT		down	up	59.m08665	AN5014.1	AO070334000120	60S ribosomal protein L22	J		2.88265	1	1	1	0	332	88	84	70	0
1475	TTTCCTTT		down	down	69.m14876	AN5179.1	AO070247000010	Diphthamide biosynthesis protein	J		2.88265	1	1	1	0	181	207	76			170	0
1475	TTTCCTTT		down	up	69.m15483	AN5449.1	AO070239000028	Arylsulfatase A and related enzymes	P		5.01867	3	2	1	0	29	205	238	No EST	No EST
1475	TTTCCTTT		down	down	58.m07499	AN5573.1	AO070328000033	predicted protein [Neurospora crassa]				1	1	1	0	155	287	371			No EST	No EST
1475	TTTCCTTT		down	up	58.m07334	AN5642.1	AO070342000232	predicted protein [Neurospora crassa]				2	1	3	0	198	163	38	No EST	No EST
1475	TTTCCTTT		down	down	54.m06820	AN5705.1	AO070324000154	Golgi protein	U		2.8058	1	1	1	0	163	224	107			No EST	No EST
1475	TTTCCTTT		down	down	54.m06840	AN5719.1	AO070324000131	60s acidic ribosomal protein P1	J		2.88265	1	2	1	1	25	37	27			438	1
1475	TTTCCTTT		down	down	54.m06848	AN5728.1	AO070324000123	Ca2+/calmodulin-dependent protein kinase kinase beta and related serine/threonine protein kinases	T		0.696606	2	1	1	0	274	292	58			528	1
1475	TTTCCTTT		down	down	72.m19916	AN5836.1	AO070340000001	RNA polymerase II, large subunit	K		2.06254	1	1	2	0	164	20	46			No EST	No EST
1475	TTTCCTTT		down	down	72.m19954	AN5911.1	AO070248000037	Actin-related protein	Z		0.0870047	1	1	1	0	2	180	13			No EST	No EST
1475	TTTCCTTT		down	down	72.m19145	AN5995.1	AO070340000282	Carbonic anhydrase				2	1	1	0	39	6	18			No EST	No EST
1475	TTTCCTTT		down	down	72.m19290	AN6192.1	AO070308000109	Serine/threonine protein kinase	T		0.696606	1	1	1	0	31	186	273			No EST	No EST
1475	TTTCCTTT		down	down	72.m19409	AN6251.1	AO070304000036	Diadenosine and diphosphoinositol polyphosphate phosphohydrolase	T		0.696606	2	1	1	0	106	86	109			No EST	No EST
1475	TTTCCTTT		down	down	72.m19508	AN6347.1	AO070275000012	Serine/threonine protein kinase				1	1	1	0	47	47	127			No EST	No EST
1475	TTTCCTTT		down	down	62.m03201	AN6597.1	AO070326000046	Protein kinase PITSLRE and related kinases				1	2	1	0	113	51	36			No EST	No EST
1475	TTTCCTTT		down	up	62.m03196	AN6601.1	AO070326000052	Transmembrane protein				1	1	1	0	67	129	107	No EST	No EST
1475	TTTCCTTT		down	up	62.m03214	AN6618.1	AO070326000068	Ypt/Rab-specific GTPase-activating protein GYP7 and related proteins	T		0.696606	1	2	1	0	115	112	127	No EST	No EST
1475	TTTCCTTT		down	up	65.m07245	AN6725.1	AO070339000169	Protein involved in mRNA turnover and stability	A		6.2612	1	2	1	1	139	35	46	45	1
1475	TTTCCTTT		down	up	65.m07227	AN6740.1	AO070339000186					1	1	3	0	429	62	34	No EST	No EST
1475	TTTCCTTT		down	down	57.m05403	AN7626.1	AO070294000087	Adaptor protein Enigma and related PDZ-LIM proteins	TZ		0.696605565444995 0.0870047362491821	1	2	1	0	20	10	89			No EST	No EST
1475	TTTCCTTT		down	down	62.m03408	AN8666.1	AO070269000070	von Willebrand factor and related coagulation proteins	V		5.7232	2	1	2	0	60	424	116			No EST	No EST
1475	TTTCCTTT		down	down	62.m03339	AN8741.1	AO070250000041	FOG: Zn-finger				2	1	2	1	92	38	30			No EST	No EST
1475	TTTCCTTT		down	down	71.m15957	AN8825.1	AO070271000056	Clathrin coat binding protein/Huntingtin interacting protein HIP1, involved in regulation of endocytosis	U		2.8058	1	2	1	0	100	37	200			No EST	No EST
1475	TTTCCTTT		down	down	71.m15961	AN8830.1	AO070271000049	Checkpoint kinase and related serine/threonine protein kinases	D		2.03252	1	2	5	0	211	159	222			327	1
1475	TTTCCTTT		down	down	66.m04555	AN9096.1	AO070332000179					2	3	1	0	97	36	299			370	1
1475	TTTCCTTT		down	down	62.m03402	AN9500.1	AO070205000004	Cyclin				4	1	2	1	32	66	52			No EST	No EST
1581	TGCATATA		down	down	69.m15252	AN0595.1	AO070280000021	NADP/FAD dependent oxidoreductase	C		0.233637	1	1	1	1	100	68	66			No EST	No EST
1581	TGCATATA		down	down	70.m15234	AN1016.1	AO070312000002	G-protein alpha subunit (small G protein superfamily)	DT		0.955622978532695 0.307523087264298	1	1	1	0	415	448	454			No EST	No EST
1581	TGCATATA		down	down	69.m15037	AN1731.1	AO070324000062	Proline oxidase	E		1.67627	1	1	1	1	124	85	119			137	1
1581	TGCATATA		down	down	59.m08494	AN2496.1	AO070312000124	Putative transmembrane protein cmp44E				1	1	1	0	122	104	133			No EST	No EST
1581	TGCATATA		down	up	59.m08506	AN3145.1	AO070312000163	Splicing coactivator SRm160/300, subunit SRm300	A		4.4786	1	1	1	0	26	468	545	No EST	No EST
1581	TGCATATA		down	down	58.m07387	AN3587.1	AO070342000137	Ubiquitin-specific protease	O		0.487837	1	1	1	0	37	35	39			No EST	No EST
1581	TGCATATA		down	down	54.m07034	AN4238.1	AO070234000002	Ribosomal protein S6 kinase and related proteins	T		0.307523	1	1	1	0	63	38	38			151	1
1581	TGCATATA		down	down	58.m07904	AN4415.1	AO070273000036	Holocytochrome c synthase/heme-lyase	CO		0.233637461301134 0.487836716418576	1	1	1	0	50	131	25			No EST	No EST
1581	TGCATATA		down	down	72.m19781	AN7284.1	AO070297000024	Mitochondrial ribosomal protein L17	J		1.59069	1	1	1	1	152	105	144			No EST	No EST
1602	AGGCGGT		up	up	71.m15417	AN0133.1	AO070321000120	mRNA splicing factor ATP-dependent RNA helicase	A		0.330109	1	1	1	0	183	100	93	No EST	No EST
1602	AGGCGGT		up	up	54.m06468	AN0275.1	AO070334000082	Cystine transporter Cystinosin	E		3.54259	1	1	1	0	188	80	105	No EST	No EST
1602	AGGCGGT		up	up	69.m15266	AN0582.1	AO070280000004	Single-stranded DNA-binding replication protein A (RPA), medium (30 kD) subunit	L		4.86614	1	1	1	1	65	55	106	No EST	No EST
1602	AGGCGGT		up	up	70.m15629	AN0988.1	AO070318000150	LAMMER dual specificity kinases	T		0.803304	1	1	1	1	311	190	133	No EST	No EST
1602	AGGCGGT		up	up	70.m15237	AN1019.1	AO070343000596	Cullins	D		1.88376	1	1	1	1	494	44	2	69	1
1602	AGGCGGT		up	up	70.m15196	AN1038.1	AO070336000073	Putative transmembrane protein				1	1	1	0	156	129	166	No EST	No EST
[truncated: 974 more rows]

## Sheet: conpat_matrices.ace
# Motif 45 TTTCTTTTTCTTTTTTTT
Motif 45
TTTCTTTTTCTTTTTTTT
TTCCTTTTTTTTTTTTTT
TTTTTTTTTCTTTTCTTT
TTCCTTTTTCTTTTTTTC
TTTCTTTTTTTTTTTTTT
CTTTTCTTTCTTTCTTTT
CTTTTCTTTTTTTCTTTT
TTTTCTTTTCTTTCCTTT
CTTCTTTCTCTTTCTTCT
TTTCTTCGTCTTTCGTTT
TTTCTTCCTATTTCTCTT
TCTCTTCTTATTTCTTAT
TTTCCTCCTCTTCTTTCT
TTTTTCCGTTTATTTTTT
TTCCGTCTGCTCTTTTTC
******************
# Motif 233 TCTCCTTTCCTCyC
Motif 233
TCTCCTTTCCTCCC
TCTTCTTTCTTCCC
TCTCCGTCCCTCTC
TCTCCTTCCCTCCG
TCTCCTTCCATCTC
TCTTCTTTCCTATC
TCTCCATTCTTCTC
TTTTCTTTTTTCCC
TCTCCTTCCCACCG
TTTCCTTCCCCCCG
TCTACTTTCCTATC
GCTCCGTTTCTCTC
**************
# Motif 234 GTTTGTCnTGTTTG
Motif 234
GTTTGTCTTGTTTG
GTTTGTCTTGTTTG
GTTTGTCTTGTTTG
GTTTGTCCTGTTTG
GTTTGTCCTGTTTG
GTTTGTCCTGTTTG
GTTTGTTTTGTTTG
GTTTGTCTTGTTTG
GTTTGTCCTGTTTG
GTTTGTTCTGTTTG
GTTTGTCTTGTTTG
GTTTGTCTTGTTTG
XTTTGTTTTGTTTG
GTTTGTCTTGTTTG
GTTTGTTATGTTTG
GTTTGTTCTGTTTG
GTTTGTTCTGTTTG
GTTTGACCTGTTTG
GTTTGCTTTGTTTG
GTTTGCTTTGTTTG
GTTTGTCGTGTTTG
GTTTGTCTTGTTTX
GTTTGTCTTGTTTX
GTTTGTCTTGTTTX
GTTTGTTATGTTTG
GTTTGCGTTGTTTG
XTTTGCTTTGTTTG
GTTTGTCCTGTTTG
GTTTGCTCTGTTTG
GTTTGTTGTGTTTG
XTTTGCCATGTTTG
XTTTGTGCTGTTTG
XTTTGTGCTGTTTG
GTTTGCGCTGTTTG
XTTTGTTGTGTTTG
XTTTGTCTGGTTTG
GTTTGACATGTTTG
XTTTGGCTTGTTTG
TTTTGTCTTGTTTG
GTTTGCACTGTTTG
GTTTGCACTGTTTG
XTTTGCCCTATTTG
GTTTGCACCGTTTG
GTTTGCACGGTTTG
GTTTGAGTAGTTTG
CCTTGTTCTGTTCA
GTTTTTCTCGTTCT
CCTCGTCCTCTTTA
GATTGTCTTGGTCT
AGTTTTCACGTTTT
CCTCATCCTCTTTA
**************
# Motif 252 ACGCGTAAAGTGGTT
Motif 252
ACGCGTAAAGTGGTT
ACGCGTAAAGTGGTT
ACGCGTAAAGTGGTT
ACGCGTAAAGTGGTT
ACGCGTTAAGTGGTT
ACGCGTAAAGTGGTT
ACGCGTAAAGTGGTT
ACGCGTTAAGTGGTT
ACGCGTTAAGTGGTT
ACGCGTTAAGTGGTT
ACGTGTAAAGTGGTT
ACGCGTTAATTGATT
XXGCGTAAAGTGGXX
XXGCGTAAAGTGGXX
XXGCGTTAAGTGGXX
***************
# Motif 328 GCATAGCATGGCGT
Motif 328
GCATAGCATGGCGT
GCATAGCATGGCGT
GCATAGCGTGGCGT
GCATAGCGTGGAGT
GGTTAGCATGGCGT
GCATAGCAAGGCGT
GCATAGCGTGGCGT
GCATAGCGTGGCGT
GCATAGCGTGGCGT
GGTTAGCATGGCGC
GGTTAGCATGGCGC
GCATGGCACGGAGT
**************
# Motif 336 GGCGTTTGGG
Motif 336
GGCGTTTGGG
GGCGTTTGGX
GGCGTTTTGG
GGCGTTTGGX
GGCGTTTGGX
GGTGTTTGGG
GGCGTTCGGG
GGCGTTGGGG
GGCGATTTCG
GGTGTTTCGG
GGCGTCGGGG
GGCGAGTTGA
**********
# Motif 344 GGCAAAATdAAC
Motif 344
GTCAAAATGAAC
GGCAAAATGAAC
GGCAAAATGAAG
GGCGAAATGAAC
GTCAAAATAAAC
GTCAAAATAAAC
GTCAAAATAAAC
GGCAAAACGAAC
GGCGAAATAAAG
GGCAGAATAGAC
GGCAAAAATGAC
GTCAGAATGAGA
************
# Motif 347 wmAAAAGTTC
Motif 347
AAAAAAGTTC
AAAAAAGTTC
AAAAAAGTTC
AAAAAAGTTC
TCAAAAGTTC
TCAAAAGTTC
TCAAAAGTTC
TCAAAAGTTC
AAAAAAGTTG
AAAAAAGTTG
TCACAGTTTC
TCACACGTCC
**********
# Motif 418 CAAACAGTGCAAA
Motif 418
CAAACAGTGCAAA
CAAACAGTGCAAA
CAAACAGTGCAAA
XAAACAGTGCAAA
XAAACAGTGCAAA
CAAACATTGCAAA
CAAACAGTGCAAA
CAAACAGTGCAAA
CAAACTGTGCAAA
CAAACGGTGCAAA
CAAACGGTGCAAA
CAAACATTGCAAA
CAAACATTGCAAA
CAAACAGTACAAA
CAAATTGTGCAAA
CAAACAATGCAAA
XAAACAGTTCAAA
CAAATAGTACAAA
CAAACATTCCAAA
CAAACAATGCAAX
CAAACACTGCAAX
CAAACAAGTCAAA
TAAACTGTGCAAT
AAAACACTGCAAC
TAAGCAGAGCAAX
CATTGGGTGCAAA
CAAGATGTGTAAT
*************
# Motif 616 CGCGAAdTCACGTG
Motif 616
CGCGAAGTCACGTG
CGCCAAATCACGTG
CGCGAGGTCACGTG
CACGAAGTCACGTG
CACGAGGTCACGTG
CACGAGGTCACGTG
CACGAGATCACGTG
CGCGAAGTCACCTG
CGCCAAACCACGTG
CGCGCATTCACGTG
CACGAGATCACATG
ACCCAAATCACGTC
CGTCACTTCACGTG
AGCCAATTCACCTT
AGCCAAACCACCTC
**************
# Motif 652 CTCTCCTTCTCCCC
Motif 652
CTCTCCTTCTCCTT
CCCACCTTCTCCCC
CTCTCCTTCTCTTC
CTCTCCTTCTCTTC
CTCTCCTTCTCTTC
TCCTCCTTCTTCCC
CTCTCCTTCTTCCT
CCCCCCTTCTCCCC
TTCTCCTTCCCCTC
GCCACCTTCTCCCC
CTCTCCTCCCTCCT
CTCTCCTCCCTCCT
CCCTCCCTCTTCCT
TCCACCXTCCCCCC
CTCACCTCTTTCCC
**************
# Motif 698 CCCTCCATCTCCA
Motif 698
CCCTCCATCTCCA
CCCTCCATCTCCA
CCCTCCATCGCCA
CCCTTCATCTCCA
CCCTCCCCCTCCA
CCCTCCCCCTCCA
CACTCCATCTCCC
TCCTCTATCTCCT
CACTCCTTCCCCA
TCCTCCAGCTCTT
CACTCCTTTCCCA
TCTTCTATCTCTT
*************
# Motif 751 ACCGCCTTCC
Motif 751
ACCGCCTTCC
ACCGCCTTCC
ACCGCCTTCC
ACCGCCTTCC
ACCGCCTTCC
ACCGCCTTCC
ACCGCCTTCC
ACCGCCTGCC
ACCGCCTGCC
GCCGCCTTCC
GCCGCCTTCC
ACCGCCTTTC
ACCGCCTCCC
ACCGCCTGCT
GCCGCCATCC
AGCGCCTTAC
AGCGCCCTCC
ACCGCTTTGC
**********
# Motif 813 ACGTCAC
Motif 813
ACGTCAC
ACGTCAC
ACGTCAC
ACGTCAC
ACGTCAC
ACGTCAC
ACGTCAC
ACGTCAC
ACGTCAC
ACGTCAC
ACGTCAC
ACGTCAC
XCGTCAC
XCGTCAC
ACGTCAC
XCGTCAC
ACGTCAG
ACGTCAT
*******
# Motif 843 TGAGCCTCGG
Motif 843
TGAGCCTCGG
TGAGCCTCGG
TGAGCCTCGG
TTAGCCTCGG
TGTGCCTCGG
TGAGCCTCAG
CGAGCCTCGG
CGAGCCTCGG
TTTGCCTCGG
TGAGGCTCGG
CGAACCTCGG
AGAGCCTTGT
**********
# Motif 855 TTCCGCCCGC
Motif 855
TTCCGGCCGC
TTCCGCCCGC
TCCCGCCCGA
TTCCGCCCGC
TTCCGCCCGC
TCCCGCCCGC
TTCCGCCCGC
CTCCGGCCGA
TGCCGCCCGC
TCCCGGCCGA
TTCCGGCTGA
TCCCGGCCGA
TTCCAGCCGA
TTTCGCCTGC
TTCCGGCGTA
**********
# Motif 896 TGGTCCGTGC
Motif 896
TGGTCCGTGC
TGGTCCGTGC
TGGTCCGTGC
XGGTCCGTGC
XGGTCCGTGC
TGGTCCGTGC
TGGTCCGTGX
TGGTCCGTGX
TGGTCCGTGX
TGGTCCGTGX
TGGTCCGTGC
TGGTCCGTGC
TGGTCCGTGC
TGGTCCGTGC
TGGTCCGTGX
TGGTCCGTGX
TGGTCCGTGX
XGGTCCGTGC
XGGTCCGTGC
XGGTCCGTGC
TGGTCCGTGX
TGGTCCGTGX
TGGTCCGTGX
TGGTCCGTGC
XGGTCCGTGC
XGGTCCGTGC
XGGTCCGTGC
TGGCCCGTGC
TGGCCCGTGC
TGGCCCGTGC
TGGCCCGTGC
TGGCCCGTGC
TGGCCCGTGC
TGGTCTGTGC
TGGTCTGTGC
TGGCCCGTGX
TGGCCCGTGX
XGGTCTGTGC
XGGTCTGTGC
XGGCCCGTGC
XGGTCTGTGC
TGGTCTGTGX
TGGTCTGTGX
TGGTTCGTGC
TGGACCGTGX
**********
# Motif 973 CACCGCCT
Motif 973
CACCGCCT
CACCGCCT
CACCGCCT
CACCGCCT
CACCGCCT
CACCGCCT
CACCGCCT
CACCGCCT
CACCGCCT
CACCGCCT
CACCGCCT
CACCGCCT
CACCGCCT
CACCGCTT
CACCGCCT
GACCGCCT
GACCGCCT
CACCGCTT
CACCGCCT
CACCGCCC
CACCGCCT
CACCGCCT
CACCGCTT
TACCGCTT
********
# Motif 992 GCATAGCG
Motif 992
GCATAGCG
GCATAGCG
GCATAGCG
GCATAGCG
GCATAGCG
GCATAGCG
GCATAGCG
GCATAGCG
GCATAGCG
GCATAGCG
GCATAGCG
GCATAGCG
GCATAGCG
GCATAGCG
GCATAGCG
GCATAGCG
GCATAGCA
GCATAGCA
GCATAGCG
GCATAGCG
GCATAGCX
GCATAGCX
GCATAGCX
GCATAGCA
GCATGGCG
GCATCGCG
GCATCGCG
********
# Motif 1059 TCGGCCCG
Motif 1059
TCGGCCCG
TCGGCCCG
TCGGCCCG
TCGGCCCG
TCGGCCCG
TCGGCCCG
TCGGCCCG
TCGGCCCG
TCGGCCCG
TCGGCCCG
TCGGCCCG
TCGGGCCG
TCGGGCCG
TCGGGCCG
TCGGGCCG
********
# Motif 1093 CCCCTCCCCC
Motif 1093
CCCCTCCCCT
CCCCTCCCCC
CCCCTCCCCC
CCCCTCCCCC
CCCCTCCCCC
CCCCTCCCCC
CCCCTCCCCT
GCCCTCCTCC
CCCCTCCCTT
GCCCGCCCCC
XCCCTCCTTC
XCCCTCCTTC
CGCCTCCCTC
CCCCTTCACC
CCTCTCCTTC
**********
# Motif 1132 CCCCTCT
Motif 1132
CCCCTCT
CCCCTCT
CCCCTCT
CCCCTCT
CCCCTCT
CCCCTCT
CCCCTCT
CCCCTCT
CCCCTCT
CCCCTCT
CCCCTCT
CCCCTCT
CCCCTCT
TCCCTCT
TCCCTCT
TCCCTCT
CCCCTCT
CCCCTCT
CCCCTCT
CCCCTCT
CCCCTCT
CCCCTCT
GCCCTCT
CCCCGCT
CCCCGCT
CCCCTCT
CCCCTCT
CCCCTCT
TCCCTCT
TCCCCCT
GCCCGCT
CCGCTCT
GCACTCT
CCTCCCT
CCCGTCT
TTCTTCT
*******
# Motif 1144 TGTACTAT
Motif 1144
TGTACTAT
TGTACTAT
TGTACTAT
TGTACTAT
TGTACTAT
TGTACTAT
TGTACTAT
TGTACTAC
TGTACTAT
TGTACTAT
TGTACTAT
TGTACTAT
TGTACTAT
TGTACTAC
TGTACAAT
TGTACTAC
TGTACAAT
TGTACTAC
TGTACTAC
TGTACCAT
TGTACTAT
TGTGCTAT
TGTACAAT
TTTAATTT
********
# Motif 1183 AAACAAGGCA
Motif 1183
AAACAAGGCA
AAACAAGGCA
AAACAAAGCA
AAACAAGGCA
AAACAGGGCA
AAACACGGCA
AAACAAGACA
AAACAGAGCA
AAACGAAGCA
AAACGCGTCA
AAAGAATGCA
AAGCCAGGCA
**********
# Motif 1230 TTACCCCTC
Motif 1230
TTACCCCTC
TTACCCCTC
TTACCCCTC
TTACCCCTC
TTACCCCTC
TTACCCCTC
TTACCCCTC
TTACCCCGC
TTACCCCAC
CTACCCCAC
CTACCCCTT
CTACCCCTT
*********
# Motif 1270 CTTTTCCGTCC
Motif 1270
XTTTTCCGTCC
XTTTTCCGTCC
CTTTTCCGTCC
CTTTTCCGTCC
CTTCTCCGTCA
CTTTTCCCACC
CTTTTCCCACC
CCTGTCCGTCC
CCTTTCTGTCA
TTTCTCCGTCG
XTTTCCCGCCC
CCGTTTCGTCC
***********
# Motif 1291 TGAGTCAG
Motif 1291
TGAGTCAG
TGAGTCAG
TGAGTCAG
TGAGTCAG
TGAGTCAG
TGAGTCAG
TGAGTCAG
TGAGTCAG
TGAGTCAG
TGAGTCAG
TGAGTCAG
TGAGTCAG
TGAGTCAG
TGACTCAG
TGAGTCAG
TGAGTCAG
TGAGTCAG
TGACTCAG
TGACTCAG
TGAGTCAG
TGAGTCAG
TGAGTAAG
TGACTCAG
TGACTCAG
TTAGTCAG
TGAGTAAG
TTAGTCAG
********
# Motif 1407 CCCGTGACT
Motif 1407
CCCGTGACT
CCCGTGACT
CCCGTGACT
CCCGTGACT
CCCGTGACT
XCCGTGACC
XCCGTGACC
XCCGTGACT
CCCGTGACC
CCCGTGACC
CCCGTGATT
CATGTGACT
*********
# Motif 1426 CCCGAGGT
Motif 1426
CCCGAGGT
CCCGAGGT
CCCGAGGT
XCCGAGGT
CCCGAGGT
CCCGAGGT
GCCGAGGT
GCCGAGGT
CCCGAGGT
CCCGAGGT
CCCGAGGT
CCCGAGGT
CCCGAGGT
CCCGAGGT
GCCGAGAT
GCCGAGAT
CCCGACGT
CCCGAGAT
GCCGACGT
GCCGAAGT
CCCGAGAC
********
# Motif 1453 TTTGGTCTT
Motif 1453
ATTGGTCTT
ATTGGTCTT
ATTGGTCTT
TTTGGTCTT
TTTGGTCTT
TTTGATCTT
TTTGGTCAT
TTTTGTCTT
TTTTGTCTT
TTTGGTCTG
TTTGCTCTT
TTAGGTCTT
TTTGGTCGT
TTGGCTCTT
TTTTTTCGG
*********
# Motif 1475 TTTCCTTT
Motif 1475
TTTCCTTT
TTTCCTTT
TTTCCTTT
TTTCCTTT
TTTCCTTT
TTTCCTTT
TTTGCTTT
TTTTCTTT
TTTTCTTT
CTTCCTTT
CTTGCTTG
TTTGCTTC
********
# Motif 1581 TGCATATA
Motif 1581
TGCATATA
TGCATATA
TGCATATA
TGCATATA
TGCATATA
TGCATATX
TGCATATX
TGCATATX
TGCATATA
TGCATATA
TGCATATA
TGCXTATA
TGCACATA
TGCATTTA
TGCGCATA
********
# Motif 1602 AGGCGGT
Motif 1602
AGGCGGT
AGGCGGT
AGGCGGT
AGGCGGT
AGGCGGT
AGGCGGT
AGGCGGT
AGGCGGT
AGGCGGT
AGGCGGT
AGGCGGT
AGGCGGT
AGGCGGT
AGGCGGT
AGGCGGT
AGGCGGT
AGGCGGT
AGGCGGT
AGGCGGT
AGGCGGT
AGGCGGT
AGGCGGT
AGGCGGT
AGGCGGT
AGGCGGT
AGGCGGX
AGGCGGX
AGGCGGX
AGGCGGT
AGGCGGT
AGGCGGT
AGGCGGX
AGGCGGX
AGGCGGX
AGGCGGX
AGGCGGX
AGGCGGX
AGGCGGT
XGGCGGT
XGGCGGT
AAGCGGT
XGGCGGC
*******
# Motif 1622 ATCTTATC
Motif 1622
ATCTTATC
ATCTTATC
ATCTTATC
ATCTTATC
ATCTTATC
ATCTTATC
ATCTTATC
ATCTTATC
ATCTTATC
ATCTTATC
ATCTTATC
ATCTTATC
ATCTTATC
ATCTTATC
ATCTTATC
ATCTTATC
ATCTTATC
ATCTTATC
ATCTTATX
ATCTTATX
ATCTTATX
ATCTTATX
ATCTTATX
ATCTTATX
ATCTTATC
ATCTTATC
ATCTTATC
ATCTTATC
ATCTTATC
ATCTTATC
ATCTTATC
ATCTTATC
ATCTTATC
ATCTTATC
ATCTTATC
ATCTTATC
ATCTTATC
ATCTTATC
XTCTTATC
ATCTTATX
ATCTTATX
ATCTTATX
ATCTAATC
ATCTAATC
ATCTAATC
ATCTAATC
ATTTTATC
ATTTTATC
ACCTTATC
ATCGTATC
TTCTTATX
AGCTTATC
XTCTTAGC
XTCTTAGC
ACCTTATX
GTCTTATX
AGCTTGTC
********
# Motif 1635 CGACAACCC
Motif 1635
CGACAACCC
CGACAACCC
CGACAACCC
CGACAACCT
CGACAACCT
CGACAACCC
CGACAACCC
CGACAACCT
CGACAACCX
CGACAACCX
CGACAACCX
CGACAACCC
CGACAACCC
CGACAACCC
TGACAACCC
CGACACCCC
CGACAAACC
CAACAACCC
TGACAACCC
CGACCACCC
TGGCAACCC
TGGCAACCC
CGACGACCC
TGACAGCCC
*********
# Motif 1650 GAAATTT
Motif 1650
GAAATTT
GAAATTT
GAAATTT
GAAATTT
GAAAATT
GAAATTT
GAAATTT
GAAATTX
GAAATTX
GAAATTX
GAAATTT
GAAATTT
GAAAATT
GAAAATT
GAAAATT
GAATTTT
GAAATTT
CAAATTT
*******
# Motif 1710 TGTATATA
Motif 1710
TGTATATA
TGTATATA
TGTATATA
TGTATATA
TGTATATA
TGTATATA
TGTATATA
TGTATATA
TGTATATA
TGTATATA
TGTATATA
TGTATATA
TGTATATA
TGTATATA
TGTATATA
TGTATATA
TGTATATA
TGTATATA
TGTATATA
TGTATATA
TGTATATA
TGTATATA
TGTATATA
TGTATATA
TGTATATA
XGTATATA
XGTATATA
XGTATATA
TGTATATT
TGTATATT
GGTATATA
TGTATATT
TGTATATT
AGTATATA
TTTATATA
XXTATATA
AGTATATA
TGTACATA
TGTACATA
TGTACATA
TGTAAATA
TGTAAATA
TGTATAAT
TTTGTATA
GCTATATA
TGTATACT
AGTATATG
GTTGTATA
********
# Motif 1723 TCTCGTGA
Motif 1723
TCTCGTGA
TCTCGTGA
TCTCGTGA
TCTCGTGA
TCTCGTGA
TCTCGTGA
TCTCGTGA
TCTCGTGA
TCCCGTGA
TCCCGTGA
CCTCGTGA
CCTCGTGA
TCGCGTGA
TCTTGTGA
TCTCGTAA
********
# Motif 1739 GGGCTTAGGG
Motif 1739
GGGCTTAGGG
GGGCTTAGGG
GGGCATAGGG
GGGCTTAGGG
GGGCTTAGGG
GGGCTTAGGG
GGGCATAGGG
GGGCATAGGG
GGGCTTAGGX
GGGCATAGGG
GGGCTTAGGX
GGGCTAAGGG
XGGCTTAGGG
XGGCTTAGGG
XGGCTTAGGG
GGGCATAGGX
XGGCTTAGGG
XGGCTTAGGG
XGGCATAGGG
GGGCTAAGGX
GGGCTCAGGX
GGGTATAGGG
XGGCTCAGGG
XGGCTCAGGG
GGGGATAGGG
XGGTTTAGGG
GGGCTAGGGX
**********
# Motif 1821 TCACGTG
Motif 1821
TCACGTG
TCACGTG
TCACGTG
TCACGTG
TCACGTG
TCACGTG
TCACGTG
TCACGTG
TCACGTG
TCACGTG
TCACGTG
TCACGTG
TCACGTG
TCACGTG
TCACGTG
TCACGTG
TCACGTG
TCACGTG
TCACGTG
TCACGTG
TCACGTG
TCACGTG
TCACGTG
TCACGTG
TCACGTG
TCACGTG
TCACGTG
TCACGTG
TCACGTG
TCACGTG
TCACGTG
TCACGTG
TCACGTG
TCACGTG
TCACGTG
TCACGTG
TCACGTG
TCACGTG
TCACGTG
TCACGTG
TCACGTG
TCACGTG
TCACGTG
TCACGTG
TCACGTG
TCACGTG
TCACGTG
TCACGTG
TCACGTG
TCACGTG
TCACGTG
TCACGTG
TCACGTG
TCACGTG
TCACGTG
TCACGTG
TCACGTG
TCACGTG
TCACGTG
TCACGTG
TCACGTG
TCACGTG
TCACGTG
TCACGTG
TCACGTG
TCACGTG
TCACGTG
TCACGTG
TCACGTX
TCACGTX
TCACGTX
TCACGTG
TCACGTG
TCACGTG
TCACGTX
TCACGTX
TCACGTX
TCACGTX
TCACGTX
TCACGTX
TCACGTX
TCACGTX
TCACGTX
TCACGTG
TCACGTG
TCACGTG
TCACGTG
TCACGTG
TCACGTG
TCACGTG
TCACGTX
TCACGTX
TCACGTX
TCACGTX
TCACGTX
TCACGTX
TCACGTG
TCACGTG
TCACGTG
TCACGTG
TCACGTG
TCACGTG
TCACGTG
TCACGTG
TCACCTG
TCACATG
TCGCGTG
GCACGTG
*******
# Motif 1872 TATGATAC
Motif 1872
TATGATAC
TCTGATAC
TCTGATAC
TATGATAC
TATGGTAC
TATGGTAC
GATGATAC
TATGATAC
GATGATCC
GATGATCC
TATGATAX
TATGATAX
TATGATAX
TACGATAC
TATGTTCC
********
# Motif 1879 CTTATCGAT
Motif 1879
CTTATCGAT
CTTATCGAT
CTTATCGAT
CTTATCGAT
CTTATCGAT
CTTATCGAT
CTTATCGAT
CTTATCGAT
CTTATCGAT
XTTATCGAT
XTTATCGAT
XTTATCGAT
CTTATCGAT
CTTATCGAT
CTTATCGAT
CTTATCGAT
CTTATCGAT
CTTATCGAT
CTTATCGAT
CTTATCGAT
XTTATCGAT
XTTATCGAT
XTTATCGAT
CTTATCGAT
CTTATCGAT
XTTATCGAT
XTTATCGAT
XTTATCGAT
CTTATCGAT
CTTATCGAT
CTTATCGAT
CTTATCGAT
CTTATCGAT
CTTATCGAT
TTTATCGAT
TTTATCGAT
TTTATCGAT
CTTATCAAT
CTCATCGAT
*********
# Motif 1934 TCACATGA
Motif 1934
TCACATGA
TCACATGA
TCACATGA
TCACATGA
TCACATGA
TCACATGA
TCACATGA
TCACATGA
TCACATGA
TCACATGA
TCACATGA
TCACATGA
TCACATGA
TCACATGA
TCACATGA
TCACATGA
TCACATGA
TCACATGA
TCACATGA
TCACATGA
TCACATGA
TCACATGA
TCACATGA
TCACATGA
TCACATGA
TCACATGA
TCACATGA
TCACATGA
TCACATGX
TCACATGX
TCACATGX
TCACATGA
TCACATGA
XCACATGA
XCACATGA
XCACATGA
XCACATGA
XCACATGA
XCACATGA
TCACATGC
TCACATGC
TCACATGC
TCACATGC
TCACATGT
TCACATGT
TCACATGG
TCACATAA
TTACATGA
********
# Motif 1940 GTbGGCGTT
Motif 1940
GTTGGCGTT
GTCGGCGTT
GTCGGCGTT
GTTGGCGTX
GTCGGCGTX
GTCGGCGTX
GTTGGCGTT
GTTGGCGTT
TTTGGCGTT
TTCGGCGTT
TTCGGCGTT
TTCGGCGTT
TTCGGCGTT
TTTGGCGTT
TTTGGCGTT
GTTGGCATT
GTTGGCATT
TTGGGCGTT
TTGGGCGTT
ATTGGCGTT
GACGGCGTT
GTCGGTGCA
GTTTGCGCA
GTCAGTGCA
*********
# Motif 1971 CGCCGGCCG
Motif 1971
CGCCGGCCG
CGCCGGCCG
CGCCGGTCG
CGCCTGCCG
CGCCTGCCG
CACCGGCCG
CGCCTGCCG
CGCCGTCCG
CGCCGTCCG
CGCCGGTCG
CGCCGATCG
CGCTGGTCG
CGCAGGCCG
CGCCCGCCG
CACCAGCCG
*********
# Motif 1998 CCTCGGCA
Motif 1998
CCTCGGCA
CCTCGGCA
CCTCGGCA
CCTCGGCA
CCTCGGCA
CCTCGGCA
CCTCGGCA
CCTCGGTA
CCTCGGTA
CCTCGGTA
CCTCGGTA
CCTCGGTA
CCTCGGTA
XXTCGGCA
XXTCGGCA
XXTCGGCA
CCTCGGTA
CCTCGGCT
********
# Motif 2032 GAAGCTCTC
Motif 2032
GAAGCTCTC
GAAGCTCTC
GAAGCTCCC
AAAGCTCTC
AAAGCTCTC
AAAGCTCTC
GAAGCTTTC
GAAGCTCTC
GAAGCTCTC
GAAGCTCTC
AAAGCTCTC
GAAGCTCTX
GAAGCTCCX
GAAGCTCCX
GAGGTTTTC
*********
# Motif 2077 TGTACAAATA
Motif 2077
TGTACAAATA
TGTACAAATA
TGTACAAATA
TGTACAAATA
TGTACAAATA
TGTACAAATA
TGTACAAATX
TGTACAAATX
TATACAAATA
TATACAAATA
TATACAAATA
TGTATAAATA
TGTATAAATA
XATACAAATA
XATACAAATA
TGTACAAACA
TGTACCAATA
XXXACAAATA
TGTATAAAXX
TGTATAAAXX
TGTAAAAATX
XATACAAGTA
XXXACAGATA
XXXACAAGTA
TGTACAGAGC
TGTACAGAGC
TGTATAATXX
**********
# Motif 2093 CCCCGCAC
Motif 2093
CCCCGCAC
CCCCGCAC
CCCCGCAC
CCCCGCAC
CCCCGCAC
XCCCGCAC
XCCCGCAC
XCCCGCAC
CCCCGCAC
CCCCGCAC
XCCCGCAC
XCCCGCAC
CCCCGCAC
CCCCGCAT
CCCCGCAT
CCCCGCAT
CCCCGCAG
XCCCACAC
********
# Motif 2194 GGvGTTTGGAG
Motif 2194
GGAGTTTGGAG
GGAGTTTGGAG
GGAGTTTGGAG
GTCGTTTGGAG
GTGGTTTGGAG
GTGGTTTGGAG
GTCGTTTGGAG
GTCGTTCGGAG
GGCGTTTGGAT
GGAGTTTGGGX
GTGGCTTGGAG
GGCGTCTGGAG
GGAGTTCGGAT
GGAGTTTGGTX
GGAGTTTCGGX
***********
# Motif 2199 CCACGTGC
Motif 2199
CCACGTGC
CCACGTGC
CCACGTGC
CCACGTGX
CCACGTGX
CCACGTGX
XCACGTGC
XCACGTGC
XCACGTGC
CCACGTGC
CCACGTGC
CCACGTGC
CCACGTGC
CCACGTGC
CCACGTGC
CCACGTGC
CCACGTGC
CCACGTGC
XCACGTGC
XCACGTGC
XCACGTGC
********
# Motif 2215 ATTCCCC
Motif 2215
ATTCCCC
XTTCCCC
XTTCCCC
ATTCCCC
ATTCCCC
ATTCCCC
ATTCCCC
ATTCCCC
GTTCCCC
ATTTCCC
ATTCCCC
ATTCCCC
XTTCCCT
ATTCCCC
ATTCCCA
*******
# Motif 2223 GGCGTTG
Motif 2223
GGCGTTG
GGCGTTG
GGCGTTG
GGCGTTG
GGCGTTG
GGCGTTG
GGCGTTG
GGCGTTG
GGCGTTG
GGCGTTG
GGCGTTG
GGCGTTG
GGCGTTG
GGCGTTG
GGCGTTG
GGCGTTG
GGCGTTA
GGCGTTC
GGCGTTC
GGCGTTC
GGCGTTC
GGCGTTG
GGCGTTG
GGCGTTG
GGCGTTA
GGCGTTA
GGCGTTA
*******
# Motif 2236 GCAGAATC
Motif 2236
GCAGAATC
GCAGAATC
GCAGAATC
GCAGAATC
GCAGAATC
GCAGAAAC
GCAGAAAC
GCAGAATA
GCAGAATA
GCAGAATA
GCAGAAAT
ACAGAAAC
********
# Motif 2249 TTTTTTT
Motif 2249
TTTTTTT
TTTTTTT
TTTTTTT
TTTTTTT
TTTTTTT
TTTTTTT
TTTTTTT
TTTTTTT
TTTTTTT
TTTTTTT
TTTTTTT
TTTTTTT
TTTTTTT
TTTTTTT
ATTTTTT
*******
# Motif 2253 TTTGGTTT
Motif 2253
TTTGGTTT
TTTGGTTT
TTTGGTTT
TTTGGTTT
TTTGGTTT
TTTGGTTT
TTTGGTTT
TTTGGTTT
TTTGGTTT
TTTGGTTT
TTTGGATT
TCTGGATT
********
# Motif 2287 TTCTTCCTT
Motif 2287
TTCTTCCTT
XTCTTCCTT
TTCTTCCTT
TTCTTCCTC
TTCTTCCTC
TTCTTCCTC
CTCTTCCTT
TACTTCCTT
TACTTCCTT
TTCTTCCCT
XTATTCCTT
XTATTCCTT
*********
# Motif 2378 TGTACAGAA
Motif 2378
TGTACAGAA
TGTACAGAA
TGTACAGAA
TGTACAGAA
GGTACAGAA
TGTATAGAA
TGTATAGAA
TGTACAGXX
TGTACAGXX
TGTACAGXX
GGTACGGAA
GGTACGGTA
*********
# Motif 2451 GATATCC
Motif 2451
GATATCC
GATATCC
GATATCC
GATATCC
GATATCC
GATATCC
GATATCC
GATATCC
GATATCC
GATATCC
GATATCC
GATATCC
GATATCT
GATATCT
GATACCC
*******
# Motif 2483 TGAGTCA
Motif 2483
TGAGTCA
TGAGTCA
TGAGTCA
TGAGTCA
TGAGTCA
TGAGTCA
TGAGTCA
TGAGTCA
TGAGTCA
TGAGTCA
TGAGTCA
TGAGTCA
TGAGTCA
TGAGTCA
TGAGTCA
*******
# Motif 2488 TACCCCGC
Motif 2488
TACCCCGC
TACCCCGC
TACCCCGC
TACCCCGC
TACCCCGC
TACCCCGC
TACCCCGC
TACCCCGC
TACCCCGC
TACCCCGC
TACCCCGC
TACCCCGX
TACCCCGX
TACCCCGX
AACCCCGC
AACCCCGC
AACCCCGC
AACCCCGC
AACCCCGC
AACCCCGX
AACCCCGX
AACCCCGX
TGCCCCGC
TGCCCCGC
********
# Motif 2497 TGCATAG
Motif 2497
TGCATAG
TGCATAG
TGCATAG
TGCATAG
TGCATAG
TGCATAG
TGCATAG
TGCATAG
TGCACAG
TGCACAG
TGCACAG
TGCACAG
TGCACAG
XGCATAG
XGCATAG
TGCCCAG
TTCXTAG
XGCACGG
*******
# Motif 2525 GACGCGT
Motif 2525
GACGCGT
GACGCGT
GACGCGT
GACGCGT
GACGCGT
GACGCGT
GACGCGT
GACGCGT
GACGCGT
GACGCGT
GACGCGT
GACGCGT
GACGCGT
GACGCGT
XACGCGT
GACGCGT
XACGCGT
XACGCGT
*******
# Motif 2529 ACGTGAC
Motif 2529
ACGTGAC
ACGTGAC
ACGTGAC
ACGTGAC
ACGTGAC
ACGTGAC
ACGTGAC
ACGTGAC
ACGTGAC
ACGCGAC
ACCTGAC
TCGCGAC
*******
# Motif 2611 TGTACAT
Motif 2611
TGTACAT
TGTACAT
TGTACAT
TGTACAT
TGTACAT
TGTACAT
XGTACAT
XGTACAT
XGTACAT
TGTACAT
TGTACAT
TGTACAT
TGTACAT
TGTACAT
TGTACAT
XGTACAT
XGTACAT
XGTACAT
TGTACAT
TGTACAT
TGTACAT
CGTACAT
CGTACAT
CGTACAT
TGTACAT
TGTACAT
TTTACAT
*******
# Motif 2662 GAGATACC
Motif 2662
GAGATACC
GAGATACC
GAGATACC
GAGATACC
GAGATACC
GAGATACC
GAGATACC
GAGATACC
GAGATACC
GAGATACC
AAGATACC
AAGATACC
********
# Motif 2677 TCACCGC
Motif 2677
TCACCGC
TCACCGC
TCACCGC
TCACCGC
TCACCGC
TCACCGC
TCACCGC
TCACCGC
TCACCGC
TCACCGC
ACACCGC
ACACCGC
XCACCGC
XCACCGC
XCACCGC
*******
# Motif 2683 TCTCCGC
Motif 2683
TCTCCGC
TCTCCGC
TCTCCGC
TCTCCGC
TCTCCGC
TCTCCGC
TCTCCGC
TCTCCGC
TCTCCGC
TCTCCGC
TCTCCGC
TCTCCGC
TCTCCGC
TCTCCGC
TCTCCGC
TCTCCGX
TCTCCGX
TCTCCGX
TCTCCGX
TCTCCGX
TCTCCGX
TCTCCGX
TCTCCGX
XCTCCGC
XCTCCGC
XCTCCGC
TCTCCGC
TCTCCGC
ACTCCGC
TATCCGX
*******
# Motif 2919 TCCCCGC
Motif 2919
TCCCCGX
TCCCCGX
TCCCCGX
TCCCCGC
TCCCCGC
TCCCCGC
TCCCCGC
TCCCCGC
TCCCCGC
TCCCCGC
TCCCCGC
XCCCCGC
XCCCCGC
XCCCCGC
CCCCCGC
*******

## Sheet: factors
Known Aspergillus Factors		Known S. cerevisiae Factors		Known 3' Elements
abaA	CATTCC	ABF1	RTCRYnnnnnACG	efficiency_element1	TATATA
amdR	TCGGCGAA...AGCCAAT	ACE2	GCTGGT	efficiency_element2	TATGTA
AnCF	AGCCAAT	ADR1	GGAGA	efficiency_element3	TTTTTATA
areA	HGATAR	Bas1	TGACTC	efficiency_element4	TTTTTATA
areA_new	WGATAAGR	Cbf1	RTCACRTG	polyA_site	AATAAAA
brlA	TCCCTyy	Cin5	TTACTAA	positioning_element1	AAGAA
cpcA	ATGACTCA	DAL81	GATAAG	positioning_element2	AAAAAA
creA	SYGGGG	Dig1	RTGAAACA	positioning_element3	AATAAA
facB_1	TCC........BGA	FKH1	TTGTTTACST	positioning_element4	TTAAGAAC
facB_2	TCS..........GSA	FKH2	TTGTTTACST	transcription_termination	TATATATATATATA
facB_3	GCA.........SGC	Gal4	CGGnnnnnnnnnnnCCG
facB_4	TCS.........GGA	GCN4	ATGACTCAT
facB_5	GCC...........TGC	GCR1	GGAAG
facB_6	GCA..........TGC	GLN3	GATAAk
facB_7	GCA........GGC	HAP2	GCCAATCA
nirA	CTCCGHCC	HAP4	TnRTTGGT
nit2_1	TATCTA	HSF1b	TTCTAGAA
nit2_2	TAGTAGAGATA	INO2	CATGTGAAat
nit2_3	TATCGC........TATCGT	INO4	CATGTGAAat
nit2_4	GAGATA	Leu3	CCGGNNCCGG
pacC	GCCARG	MAC1	TTTGCTCA
penR1	CCAAT	MBP1	ACGCGTnA
prnA_1	CCGGnCCGG	MCM1a	TTWCCcnwwwrGGAAA
prnA_2	CCGGnnCCGG	MET31	AAACTGTGGC
prnA_3	CCGGnnnCCGG	MET4	TGGCAAATG
prnA_4	CCGGnnnnCCGG	MIG1	CCCCRSWWWW
prnA_5	CCGGnnnnnCCGG	MIG1b	GCGGGG
prnA_6	CCGGnnnnnnCCGG	MSN2	CCCCT
stuA	wCGCGw	MSN4	CCCCT
UAY	CGS......SCG	PDR1	CCGCGG
		PHO4	CACGTG
		PUF3	CHTGTAWATA
		PUF4	WHTGTAHAWTA
		PUF5	TGTAAYAWTA
		PUT3	CGGnnnnnnnnnnCCG
		RAP1	ACACCCATACATTT
		REB1	CCGGGTAA
		RLM1	CTAWWWWTAG
		RME1	GAACCTCAA
		SMP1	ACTACTAWWWWTAG
		STE12	RTGAAACA
		SWI4	CRCGAAAA
		SWI5	KGCTGR
		SWI6	ACGCGT
		YAP1	TTACTAA

## Sheet: AN_cats
A. nidulans locus	A. nidulans locus description	COG category	COG description	S. cerevisiae BBH	GO cellular location for yeast gene
AN0012.1	predicted protein [Neurospora crassa]
AN0013.1	Predicted transporter (major facilitator superfamily)	R
AN0034.1	Dihydroxyacetone kinase/glycerone kinase	G	Carbohydrate transport, metabolism	YFL053W
AN0038.1	Protein kinase ATM/Tel1, involved in telomere length regulation and DNA repair	TBLD
AN0039.1	Uncharacterized conserved protein	S		YNL011C
AN0040.1	Mitochondrial DNA polymerase gamma, catalytic subunit	L	Replication, recombination, repair	YOR330C	mitochondrion
AN0042.1	Mg2+ and Co2+ transporters	P	Inorganic ion transport, metabolism
AN0043.1	Phytoene/squalene synthetase	I	Lipid transport, metabolism
AN0044.1	Helicase-like transcription factor HLTF/DNA helicase RAD5, DEAD-box superfamily	KL		YLR032W	cytoplasm nucleus
AN0046.1	Histidyl-tRNA synthetase	J	Translation, ribosomal structure, biogenesis	YPR033C	cytoplasm
AN0047.1	GTP-binding protein GP-1	R
AN0048.1	predicted protein [Neurospora crassa]
AN0049.1	N-acetylglucosaminyl phosphatidylinositol de-N-acetylase	M		YMR281W	cytoplasm
AN0050.1	Predicted metal-dependent hydrolase of the TIM-barrel fold	R
AN0051.1	Isopenicillin N synthase and related dioxygenases	R
AN0052.1	Dehydrogenases with different specificities (related to short-chain alcohol dehydrogenases)	IQR
AN0054.1	Acyl-CoA synthetase	I	Lipid transport, metabolism
AN0055.1	TmpA [Emericella nidulans]
AN0056.1	hypothetical protein [Neurospora crassa]
AN0057.1	Tyrosyl-tRNA synthetase, cytoplasmic	J	Translation, ribosomal structure, biogenesis	YGR185C	cytoplasm
AN0058.1	Predicted acyl-CoA transferases/carnitine dehydratase	C	Energy production, conversion
AN0059.1	Molecular chaperone (DnaJ superfamily)	O	Posttranslational modification/turnover/chaperones
AN0060.1	Decapping enzyme complex, predicted pyrophosphatase DCP2	A	RNA processing, modification
AN0061.1	predicted protein [Neurospora crassa]			YLR326W
AN0062.1	Uncharacterized conserved protein	S
AN0064.1	predicted protein [Neurospora crassa]
AN0065.1	Histone H3 (Lys4) methyltransferase complex and RNA cleavage factor II complex, subunit SWD2	ABO		YKL018W
AN0066.1	Mitochondrial oxaloacetate carrier protein	C	Energy production, conversion	YKL120W	mitochondrion
AN0067.1	Ribonucleotide reductase, beta subunit	F	Nucleotide transport, metabolism	YJL026W	cytoplasm nucleus
AN0069.1	WD40 repeat-containing protein	S
AN0071.1	Splicing coactivator SRm160/300, subunit SRm300	A	RNA processing, modification
AN0072.1	Pseudouridine synthase	J	Translation, ribosomal structure, biogenesis	YNL292W	cytoplasm nucleus
AN0073.1	hypothetical protein ( (AL513463) hypothetical protein [Neurospora crassa] )
AN0074.1	Nucleolar protein-like/EBNA1-binding protein	A	RNA processing, modification	YKL172W
AN0075.1	Thioredoxin/protein disulfide isomerase	O	Posttranslational modification/turnover/chaperones
AN0076.1	5'-3' exonuclease	L	Replication, recombination, repair
AN0077.1	Iron/ascorbate family oxidoreductases	QR
AN0078.1	SamB protein [Emericella nidulans]
AN0081.1	G-protein beta subunit	R		YOR212W	cytoplasm
AN0082.1	Conserved phosducin-like protein	T	Signal transduction mechanisms
AN0083.1	Transcription initiation factor IIF, auxiliary subunit	K	Transcription	YPL129W	nucleus
AN0084.1	Ran-binding protein RANBP1 and related RanBD domain proteins	U	Intracellular trafficking/secretion/transport	YDR002W
AN0085.1
AN0086.1	Glycolipid 2-alpha-mannosyltransferase (alpha-1,2-mannosyltransferase)	G	Carbohydrate transport, metabolism	YIL085C
AN0087.1	Predicted Rho GTPase-activating protein	R
AN0088.1	Predicted membrane protein	S		YML018C	vacuolar membrane
AN0089.1	Ras-related GTPase	R		YML001W	cytoplasm nucleus
AN0090.1	WD40 repeat protein TipD	R
AN0091.1	Putative protein methyltransferase involved in meiosis and transcriptional silencing (Dot1)	DK		YDR440W	cytoplasm nucleus
AN0092.1	Putative SAM-dependent rRNA methyltransferase SPB1	AR
AN0093.1	Nucleolar GTPase/ATPase p130	Y	Nuclear structure
AN0094.1
AN0097.1	ATP-dependent DNA ligase IV	L	Replication, recombination, repair	YOR005C
AN0106.1	Serine/threonine protein kinase	T	Signal transduction mechanisms
AN0109.1	Spliceosomal protein snRNP-U1A/U2B	A	RNA processing, modification
AN0111.1	mRNA splicing factor	A	RNA processing, modification	YDR416W	nucleus
AN0112.1	Pattern-formation protein/guanine nucleotide exchange factor	U	Intracellular trafficking/secretion/transport
AN0114.1	Predicted ATPase of the PP-loop superfamily implicated in cell cycle control	D	Cell cycle/division, chrom. partitioning
AN0115.1	Conserved WD40 repeat-containing protein	S
AN0116.1	Mitochondrial/chloroplast ribosomal protein L11	J	Translation, ribosomal structure, biogenesis	YNL185C	mitochondrion
AN0117.1	Histone H4	B	Chromatin structure, dynamics	YLR225C	cytoplasm
AN0118.1	Dyneins, heavy chain	Z	Cytoskeleton	YKR054C	cytoplasm
AN0120.1	Protein phosphatase 2A-associated protein	T	Signal transduction mechanisms	YMR028W
AN0121.1	Porphobilinogen deaminase	H	Coenzyme transport, metabolism	YDL205C	cytoplasm nucleus
AN0122.1	ATP-dependent Lon protease, bacterial type	O	Posttranslational modification/turnover/chaperones
AN0123.1	Predicted mitochondrial ribosomal protein L23	J	Translation, ribosomal structure, biogenesis
AN0124.1	Serine/threonine protein kinase	TR		YNL207W	cytoplasm
AN0125.1	26S proteasome regulatory complex, subunit RPN1/PSMD2	O	Posttranslational modification/turnover/chaperones
AN0126.1	DNA mismatch repair protein - MLH1 family	L	Replication, recombination, repair	YMR167W	cytoplasm nucleus
AN0127.1	Uncharacterized conserved protein, contains WD40 repeats	S		YFR021W
AN0128.1	Carboxymethyl transferase	O	Posttranslational modification/turnover/chaperones	YOL141W	cytoplasm
AN0129.1	Dual specificity phosphatase	V	Defense mechanisms
AN0130.1	Putative methyltransferase	R		YML005W	cytoplasm
AN0131.1	hypothetical protein [Neurospora crassa]			YLR250W	Golgi early Golgi
AN0132.1
AN0133.1	mRNA splicing factor ATP-dependent RNA helicase	A	RNA processing, modification	YGL120C	nucleolus
AN0134.1	Protein kinase inhibitor	D	Cell cycle/division, chrom. partitioning	YBR133C	bud neck cytoplasm
AN0135.1	Myosin assembly protein/sexual cycle protein and related proteins	ODR
AN0137.1	Predicted starch-binding protein	R		YPL110C	cytoplasm
AN0138.1	RNA polymerase II transcription initiation/nucleotide excision repair factor TFIIH, subunit TFB4	KL		YPR056W	nucleus
AN0139.1	Asparaginase	E	Amino acid transport, metabolism
AN0140.1	Actin-related protein Arp2/3 complex, subunit Arp3	Z	Cytoskeleton	YJR065C
AN0141.1	tRNA uracil-5-methyltransferase and related tRNA-modifying enzymes	J	Translation, ribosomal structure, biogenesis	YKR056W
AN0142.1	Ribosomal protein S5	J	Translation, ribosomal structure, biogenesis	YBR251W	mitochondrion
AN0144.1	Putative serine/threonine protein kinase	R
AN0145.1	AFLJ [Aspergillus parasiticus]
AN0154.1	Transcription initiation factor TFIID, subunit TAF10 (also component of histone acetyltransferase SAGA)	K	Transcription
AN0156.1	Inositol polyphosphate multikinase, component of the ARGR transcription regulatory complex	KIT
AN0158.1	NADPH:quinone reductase and related Zn-dependent oxidoreductases	CR		YBR046C	cytoplasm nucleus
AN0159.1	Splicing coactivator SRm160/300, subunit SRm160 (contains PWI domain)	AR
AN0160.1	Predicted xylanase/chitin deacetylase	G	Carbohydrate transport, metabolism
AN0161.1	mRNA cleavage and polyadenylation factor IA/II complex, subunit CLP1	A	RNA processing, modification	YOR250C
AN0162.1	Nuclear localization sequence binding protein	K	Transcription
AN0163.1	Rho GDP-dissociation inhibitor	T	Signal transduction mechanisms	YDL135C	cytoplasm nucleus
AN0164.1	Serine/threonine specific protein phosphatase involved in glycogen accumulation, PP2A-related	GT		YNR032W	cytoplasm nucleus
AN0165.1	Vesicle coat complex AP-3, beta subunit	U	Intracellular trafficking/secretion/transport	YGR261C	Golgi early Golgi
AN0166.1	Centromere-associated protein NUF2	D	Cell cycle/division, chrom. partitioning	YOL069W	spindle pole
AN0167.1	Translation initiation factor 2B, alpha subunit (eIF-2Balpha/GCN3)	J	Translation, ribosomal structure, biogenesis	YKR026C	cytoplasm
AN0170.1	Thioredoxin	O	Posttranslational modification/turnover/chaperones	YGR209C	cytoplasm nucleus
AN0172.1	MHYT domain (predicted integral membrane sensor domain)	T	Signal transduction mechanisms
AN0173.1
AN0174.1	D-aspartate oxidase	E	Amino acid transport, metabolism
AN0176.1	GATA-4/5/6 transcription factors	K	Transcription
AN0179.1	Predicted dehydrogenase	Q		YMR226C	cytoplasm nucleus
AN0182.1	Ras-related GTPase	R		YGR152C	cytoplasm nucleus
AN0183.1	3'-phosphoadenosine 5'-phosphosulfate sulfotransferase (PAPS reductase)/FAD synthetase and related enzymes	EH		YMR178W	cytoplasm nucleus
AN0189.1	RNase MRP and P, subunit POP4/p29	A	RNA processing, modification
AN0190.1	tRNA splicing endonuclease	J	Translation, ribosomal structure, biogenesis	YAR008W
AN0191.1	RNA polymerase II elongator complex, subunit ELP4	BK		YPL101W
AN0193.1	Thiamine pyrophosphokinase	F	Nucleotide transport, metabolism	YJR142W
AN0201.1	Predicted transporter (major facilitator superfamily)	R
AN0202.1	ARCA protein [Emericella nidulans]
AN0204.1	ATP-dependent RNA helicase	A	RNA processing, modification	YKR024C	nucleolus nucleus
AN0205.1	Panthothenate synthetase	H	Coenzyme transport, metabolism	YIL145C	cytoplasm nucleus
AN0206.1	Glycerol-3-phosphate O-acyltransferase	I	Lipid transport, metabolism
AN0209.1	Ammonia permease	P	Inorganic ion transport, metabolism
AN0210.1	Nucleoside phosphatase	F	Nucleotide transport, metabolism	YER005W	Golgi early Golgi
AN0211.1	U2-associated snRNP A' protein	A	RNA processing, modification	YPL213W	nucleus
AN0212.1	predicted protein [Neurospora crassa]
AN0213.1
AN0219.1	Clathrin coat binding protein/Huntingtin interacting protein HIP1, involved in regulation of endocytosis	U	Intracellular trafficking/secretion/transport
AN0224.1	Renal dipeptidase	O	Posttranslational modification/turnover/chaperones
AN0226.1	Ubiquitin-protein ligase	O	Posttranslational modification/turnover/chaperones	YDR054C	cytoplasm nucleus
AN0227.1
AN0228.1	DNA replication licensing factor, MCM6 component	L	Replication, recombination, repair	YGL201C	cytoplasm nucleus
AN0229.1	Uncharacterized conserved protein	R		YMR266W	cell periphery
AN0232.1	Ni2+-binding GTPase involved in regulation of expression and maturation of urease and hydrogenase	OK
AN0233.1	Predicted transporter (major facilitator superfamily)	R
AN0235.1	Serine/threonine protein kinase and endoribonuclease ERN1/IRE1, sensor of the unfolded protein response pathway	T	Signal transduction mechanisms
AN0236.1	Polyadenylation factor I complex, subunit PFS2	A	RNA processing, modification
AN0237.1	Uncharacterized conserved protein	S
AN0238.1	Subtilisin-related protease/Vacuolar protease B	O	Posttranslational modification/turnover/chaperones
AN0239.1	Lysosomal trafficking regulator LYST and related BEACH and WD40 repeat proteins	TU
AN0240.1	Transaldolase	G	Carbohydrate transport, metabolism	YLR354C	nucleus
AN0241.1	Cu2+/Zn2+ superoxide dismutase SOD1	P	Inorganic ion transport, metabolism	YJR104C	cytoplasm nucleus
AN0242.1	Transcriptional coactivator p100	K	Transcription
AN0243.1	Phosphatidylinositol transfer protein SEC14 and related proteins	I	Lipid transport, metabolism
AN0244.1	Vacuolar assembly/sorting protein VPS8	U	Intracellular trafficking/secretion/transport	YAL002W	endosome
AN0245.1	putative glucanase precursor [Schizosaccharomyces pombe]
AN0246.1	Endoplasmic reticulum protein EP58, contains filamin rod domain and KDEL motif	R
AN0247.1	Predicted P-loop ATPase fused to an acetyltransferase	R		YNL132W	nucleolus
AN0248.1	Thioredoxin/protein disulfide isomerase	O	Posttranslational modification/turnover/chaperones
AN0249.1	predicted protein [Neurospora crassa]
AN0252.1	F0F1-type ATP synthase, gamma subunit	C	Energy production, conversion	YBR039W	mitochondrion
AN0253.1	DNA topoisomerase I	L	Replication, recombination, repair	YOL006C	nucleolus nucleus
AN0254.1	C-3 sterol dehydrogenase/3-beta-hydroxysteroid dehydrogenase and related dehydrogenases	IE
AN0255.1	Uncharacterized conserved protein	S
AN0256.1	Cytosolic Ca2+-dependent cysteine protease (calpain), large subunit (EF-Hand protein superfamily)	OT
AN0258.1	Micrococcal nuclease (thermonuclease) homologs	L	Replication, recombination, repair	YGL085W	mitochondrion
AN0259.1	Adenylate kinase	F	Nucleotide transport, metabolism	YER170W	mitochondrion
AN0260.1	Eukaryotic-type DNA primase, large subunit	L	Replication, recombination, repair	YKL045W
AN0261.1	Vesicle coat complex COPII, subunit SEC23	U	Intracellular trafficking/secretion/transport	YPR181C
AN0262.1	40S ribosomal protein S2	J	Translation, ribosomal structure, biogenesis	YEL054C	cytoplasm
AN0265.1	O-linked N-acetylglucosamine transferase OGT	GOT
AN0266.1	Splicing factor, arginine/serine-rich	A	RNA processing, modification
AN0267.1	Myosin regulatory light chain, EF-Hand protein superfamily	Z	Cytoskeleton
AN0268.1	MesA [Emericella nidulans]
AN0270.1	Pyridoxal/pyridoxine/pyridoxamine kinase	H	Coenzyme transport, metabolism	YEL029C	cytoplasm nucleus
AN0271.1	dUTPase	F	Nucleotide transport, metabolism	YBR252W	cytoplasm nucleus
AN0272.1	Predicted aminoglycoside phosphotransferase	R
AN0273.1	FOG: Zn-finger	R
AN0275.1	Cystine transporter Cystinosin	E	Amino acid transport, metabolism	YCR075C
AN0276.1	Unnamed protein	X
AN0279.1	Transcription factor, Myb superfamily	K	Transcription
AN0280.1	Alpha-glucosidases, family 31 of glycosyl hydrolases	G	Carbohydrate transport, metabolism
AN0281.1	Ypt/Rab GTPase activating protein	U	Intracellular trafficking/secretion/transport	YMR055C	spindle pole
AN0287.1	WD40 repeat protein	R
AN0290.1	F-actin capping protein, beta subunit	Z	Cytoskeleton	YIL034C	actin
AN0292.1	Transcription initiation factor TFIID, subunit TAF5 (also component of histone acetyltransferase SAGA)	K	Transcription	YBR198C	nucleus
AN0293.1	Predicted acetyltransferases and hydrolases with the alpha/beta hydrolase fold	R		YHR075C
AN0294.1	Predicted hydrolases or acyltransferases (alpha/beta hydrolase superfamily)	R
AN0295.1	Nuclear pore complex, rNpl4 component (sc Npl4)	YU		YBR170C	cytoplasm nucleus
AN0297.1	1,4-benzoquinone reductase-like; Trp repressor binding protein-like/protoplast-secreted protein	R		YDR032C
AN0298.1	Polyadenylation factor I complex, subunit, Yth1 (CPSF subunit)	A	RNA processing, modification	YPR107C	nucleus
AN0299.1	Chitinase	G	Carbohydrate transport, metabolism
AN0300.1	Asparaginase	E	Amino acid transport, metabolism	YLR160C
AN0301.1	predicted protein [Neurospora crassa]
AN0302.1	Nucleolar GTPase/ATPase p130	Y	Nuclear structure
AN0303.1	predicted protein [Neurospora crassa]
AN0304.1	Fe2+/Zn2+ regulated transporter	P	Inorganic ion transport, metabolism	YHR134W
AN0305.1	WD40-repeat-containing subunit of the 18S rRNA processing complex	A	RNA processing, modification	YLR129W	cytoplasm nucleus
AN0306.1	Actin-related protein Arp2/3 complex, subunit ARPC2	Z	Cytoskeleton	YNR035C	actin
AN0308.1	Uncharacterized proteins of PilT N-term./Vapc superfamily	R
AN0310.1	WD40 repeat-containing protein	S		YLR196W	nucleolus cytoplasm nucleus
AN0311.1	predicted protein [Neurospora crassa]
AN0312.1	RNA polymerase I transcription factor	K	Transcription	YKL125W	nucleolus nucleus
AN0313.1	Esterase/lipase	I	Lipid transport, metabolism
AN0314.1	Aspartyl-tRNA synthetase	J	Translation, ribosomal structure, biogenesis
AN0315.1	hypothetical protein [Neurospora crassa]
AN0316.1	Alpha tubulin	Z	Cytoskeleton	YML085C	spindle pole microtubule cytoplasm
AN0317.1	Synaptic vesicle protein EHS-1 and related EH domain proteins	TU
AN0318.1	Plasma membrane H+-transporting ATPase	P	Inorganic ion transport, metabolism	YPL036W
AN0320.1	Translational repressor MPT5/PUF4 and related RNA-binding proteins (Puf superfamily)	J	Translation, ribosomal structure, biogenesis
AN0321.1	RNA polymerase III, second largest subunit	K	Transcription	YOR207C	nucleus
AN0323.1	Uncharacterized conserved protein	S
AN0326.1	Myosin class II heavy chain	Z	Cytoskeleton
AN0328.1	Uncharacterized protein involved in protein-protein interaction, contains polyproline-binding GYF domain	R
AN0329.1	Ubiquitin fusion-degradation protein	O	Posttranslational modification/turnover/chaperones	YGR048W	cytoplasm nucleus
AN0330.1	NADH:flavin oxidoreductase/12-oxophytodienoate reductase	CR
AN0331.1	predicted protein [Neurospora crassa]
AN0332.1	Synaptic vesicle transporter SVOP and related transporters (major facilitator superfamily)	R
AN0333.1
AN0335.1	unknown [Emericella nidulans]
AN0337.1
AN0339.1	predicted protein [Neurospora crassa]
AN0345.1	RNA-binding protein required for biogenesis of the ribosomal 60S subunit	J	Translation, ribosomal structure, biogenesis
AN0347.1	GTPase Rab11/YPT3, small G protein superfamily	U	Intracellular trafficking/secretion/transport	YER031C	cytoplasm nucleus
AN0349.1	Putative ATP-dependent Clp-type protease (AAA+ ATPase superfamily)	O	Posttranslational modification/turnover/chaperones	YBR227C	mitochondrion
AN0351.1	Glycerol-3-phosphate dehydrogenase/dihydroxyacetone 3-phosphate reductase	C	Energy production, conversion	YDL022W	peroxisome
AN0352.1	Alpha amylase	G	Carbohydrate transport, metabolism	YPR184W	cytoplasm
AN0354.1	3-deoxy-D-arabino-heptulosonate 7-phosphate (DAHP) synthase	E	Amino acid transport, metabolism	YDR035W	cytoplasm nucleus
AN0356.1	predicted protein [Neurospora crassa]
AN0357.1	Cytochrome c1	C	Energy production, conversion	YOR065W	mitochondrion
AN0358.1	Exocyst subunit - Sec10p	U	Intracellular trafficking/secretion/transport
AN0359.1	Translation initiation factor 3, subunit b (eIF-3b)	J	Translation, ribosomal structure, biogenesis	YOR361C	cytoplasm
AN0360.1	RNA polymerase I transcription factor UAF	K	Transcription
AN0361.1	Notchless-like WD40 repeat-containing protein	S
AN0362.1	IgE-binding protein [Aspergillus fumigatus]
AN0363.1	predicted protein [Neurospora crassa]
AN0364.1	involved in sterol uptake; Upc2p [Saccharomyces cerevisiae]
AN0365.1	predicted protein [Neurospora crassa]
AN0369.1	Metallopeptidase	R
AN0370.1	Enoyl-CoA hydratase/carnithine racemase	I	Lipid transport, metabolism
AN0373.1
AN0375.1	Permease of the major facilitator superfamily	G	Carbohydrate transport, metabolism
AN0379.1	beta-1,6-N-acetylglucosaminyltransferase, contains WSC domain	GO
AN0380.1	Cyclophilin-related peptidyl-prolyl cis-trans isomerase	O	Posttranslational modification/turnover/chaperones
AN0381.1	Chaperonin complex component, TCP-1 beta subunit (CCT2)	O	Posttranslational modification/turnover/chaperones	YIL142W
AN0385.1	Branched-chain amino acid aminotransferase/4-amino-4-deoxychorismate lyase	EH
AN0387.1	Deoxyribodipyrimidine photolyase	L	Replication, recombination, repair	YOR386W	cytoplasm nucleus
AN0388.1	hypothetical protein [Neurospora crassa]
AN0391.1	hypothetical protein [Neurospora crassa]
AN0392.1	hypothetical protein [Neurospora crassa]
AN0394.1	Monodehydroascorbate/ferredoxin reductase	R		YNR074C
AN0400.1
AN0403.1	Monodehydroascorbate/ferredoxin reductase	R
AN0404.1	Multidrug/pheromone exporter, ABC superfamily	Q
AN0406.1	Predicted RNA-binding protein involved in translational regulation	JT
AN0407.1	RNA polymerase III transcription factor TFIIIC	K	Transcription	YGR047C	cytoplasm nucleus
AN0408.1	Predicted esterase of the alpha-beta hydrolase superfamily	R
AN0409.1	Nischarin, modulator of integrin alpha5 subunit action	TZ
AN0410.1	Serine/threonine specific protein phosphatase PP1, catalytic subunit	TR		YER133W	cytoplasm nucleus
AN0411.1	Vesicle coat complex COPII, GTPase subunit SAR1	U	Intracellular trafficking/secretion/transport	YPL218W
AN0412.1	FOG: Immunoglobin and related proteins	RP
AN0414.1	Microtubule-associated protein Asp	Z	Cytoskeleton
AN0416.1	hypothetical protein [Neurospora crassa]
AN0417.1	Sec61 protein translocation complex, beta subunit	O	Posttranslational modification/turnover/chaperones
AN0418.1	Urea transporter	E	Amino acid transport, metabolism	YHL016C
AN0421.1	RNA-binding protein (RRM superfamily)	R		YPR112C
AN0422.1	TEF-1 and related transcription factor, TEAD family	K	Transcription
AN0425.1	Protein phosphatase 1, regulatory subunit, and related proteins	T	Signal transduction mechanisms
AN0426.1	Peroxisomal long-chain acyl-CoA transporter, ABC superfamily	I	Lipid transport, metabolism
AN0428.1	Lysyl-tRNA synthetase (class II)	J	Translation, ribosomal structure, biogenesis
AN0430.1	hypothetical protein [Neurospora crassa]
AN0431.1	Urea amidohydrolase (urease) alpha subunit	E	Amino acid transport, metabolism
AN0432.1	NADH-cytochrome b-5 reductase	HC		YKL150W	mitochondrion
AN0433.1	60S ribosomal protein L18A	J	Translation, ribosomal structure, biogenesis	YOR312C	cytoplasm
AN0436.1	Predicted E3 ubiquitin ligase	O	Posttranslational modification/turnover/chaperones	YDR255C
AN0439.1	Nitrogen permease regulator NLRG/NPR2	P	Inorganic ion transport, metabolism
AN0440.1	Histone acetyltransferases PCAF/SAGA/ADA, subunit TADA3L/NGG1	B	Chromatin structure, dynamics	YDR176W	nucleus
AN0442.1	Predicted actin-bundling protein	Z	Cytoskeleton
AN0443.1	Threonine dehydrogenase and related Zn-dependent dehydrogenases	ER
AN0444.1	E3 ubiquitin protein ligase	O	Posttranslational modification/turnover/chaperones
AN0445.1	60s ribosomal protein L15	J	Translation, ribosomal structure, biogenesis	YMR121C	nucleolus nucleus
AN0446.1	Uncharacterized protein PSP1 (suppressor of DNA polymerase alpha mutations in yeast)	R
AN0448.1	predicted protein [Neurospora crassa]
AN0449.1	cAMP-regulated guanine nucleotide exchange factor	T	Signal transduction mechanisms
AN0450.1	Uncharacterized conserved protein with similarity to predicted ATPase of the PP-loop superfamily	R
AN0451.1	Sigma receptor and C-8 sterol isomerase	T	Signal transduction mechanisms	YMR202W
AN0452.1	endoglucanase [Emericella desertorum]
AN0454.1	Mu-crystallin	E	Amino acid transport, metabolism
AN0455.1	Acetyltransferases, including N-acetylases of ribosomal proteins	J	Translation, ribosomal structure, biogenesis
AN0458.1
AN0460.1	predicted protein [Neurospora crassa]
AN0462.1	Exocyst protein Sec3	U	Intracellular trafficking/secretion/transport
AN0463.1	Signaling protein DOCK180	T	Signal transduction mechanisms
AN0464.1	Phosphoesterases	R
AN0465.1	40S ribosomal protein S8	J	Translation, ribosomal structure, biogenesis	YER102W	cytoplasm
AN0469.1	Na+/dicarboxylate, Na+/tricarboxylate and phosphate transporters	P	Inorganic ion transport, metabolism	YNR013C	ER
AN0470.1	Ribosomal protein S7	J	Translation, ribosomal structure, biogenesis
AN0471.1	Ca2+/H+ antiporter VCX1 and related proteins	P	Inorganic ion transport, metabolism	YDL128W	ER
AN0472.1	Predicted endo-1,3-beta-glucanase	G	Carbohydrate transport, metabolism	YNR067C	vacuole
AN0475.1	Uncharacterized conserved protein	S		YML093W	nucleolus nucleus
AN0476.1	Mitochondrial ribosomal protein L27	J	Translation, ribosomal structure, biogenesis
AN0482.1	Predicted ubiquitin-conjugating enzyme	O	Posttranslational modification/turnover/chaperones
AN0484.1	predicted protein [Neurospora crassa]
AN0485.1	Phosphatidylinositol transfer protein PDR16 and related proteins	I	Lipid transport, metabolism
AN0486.1	FOG: Zn-finger	R
AN0489.1	Synaptic vesicle transporter SVOP and related transporters (major facilitator superfamily)	R
AN0490.1	CTP synthase (UTP-ammonia lyase)	F	Nucleotide transport, metabolism	YBL039C	cytoplasm
AN0494.1	1,4-beta-D-glucan-cellobiohydrolyase [Aspergillus nidulans]
AN0495.1	Formyltetrahydrofolate hydrolase	F	Nucleotide transport, metabolism
AN0502.1	Fe-S oxidoreductase	C	Energy production, conversion	YPL207W	ER
AN0503.1	2-polyprenyl-6-methoxyphenol hydroxylase and related FAD-dependent oxidoreductases	HC
AN0504.1	Serine/threonine specific protein phosphatase involved in cell cycle control, PP2A-related	DT
AN0505.1	Nonsense-mediated decay protein Upf3	A	RNA processing, modification
AN0507.1	hypothetical protein [Neurospora crassa]
AN0554.1	Aldehyde dehydrogenase	C	Energy production, conversion	YOR374W	mitochondrion
AN0555.1	hypothetical protein [Neurospora crassa]
AN0556.1	DNA repair exonuclease MRE11	L	Replication, recombination, repair	YMR224C	cytoplasm nucleus
AN0557.1	Cdc4 and related F-box and WD-40 proteins	R
AN0558.1	beta (1-3) glucanosyltransferase Gel2p [Aspergillus fumigatus]			YOL132W
AN0559.1	Translocase of outer mitochondrial membrane complex, subunit TOM20	U	Intracellular trafficking/secretion/transport	YGR082W	mitochondrion
AN0560.1	Exocyst complex subunit	U	Intracellular trafficking/secretion/transport	YBR102C	cell periphery bud neck bud
AN0561.1	Predicted transporter (ABC superfamily)	R		YDR061W	mitochondrion
AN0562.1	Acyl-CoA synthetase	I	Lipid transport, metabolism
AN0564.1	Multiple inositol polyphosphate phosphatase	R		YHR215W	vacuole
AN0565.1	Multifunctional pyrimidine synthesis protein CAD (includes carbamoyl-phophate synthetase, aspartate transcarbamylase, and glutamine amidotransferase)	R		YJL130C	cytoplasm
AN0568.1	predicted protein [Neurospora crassa]
AN0569.1	Histone acetyltransferase SAGA/ADA, catalytic subunit PCAF/GCN5 and related proteins	BK
AN0573.1	Ypt/Rab GTPase activating protein	U	Intracellular trafficking/secretion/transport
AN0574.1	Dehydrogenases with different specificities (related to short-chain alcohol dehydrogenases)	IQR
AN0575.1	Calmodulin-binding protein CRAG, contains DENN domain	T	Signal transduction mechanisms
AN0576.1	Protein kinase containing WD40 repeats	T	Signal transduction mechanisms
AN0577.1	hypothetical protein [Aspergillus fumigatus]
AN0578.1	FOG: Zn-finger	R
AN0579.1	Isopentenyl pyrophosphate:dimethylallyl pyrophosphate isomerase	Q		YPL117C	cytoplasm nucleus
AN0581.1	Uncharacterized membrane protein, predicted efflux pump	R		YDR338C
AN0582.1	Single-stranded DNA-binding replication protein A (RPA), medium (30 kD) subunit	L	Replication, recombination, repair
AN0583.1	ATP-dependent RNA helicase	A	RNA processing, modification	YDL031W
AN0585.1	Actin regulatory protein (Wiskott-Aldrich syndrome protein)	TZ
AN0589.1	RNA Helicase	A	RNA processing, modification	YJL033W	nucleolus
AN0590.1	Predicted molecular chaperone (DnaJ superfamily)	O	Posttranslational modification/turnover/chaperones
AN0591.1	3'-phosphoadenosine 5'-phosphosulfate sulfotransferase (PAPS reductase)/FAD synthetase and related enzymes	EH		YDL045C	cytoplasm
AN0593.1	Predicted dehydrogenase	R
AN0594.1	Fry-like conserved proteins	R		YIL129C
AN0595.1	NADP/FAD dependent oxidoreductase	C	Energy production, conversion	YHR042W	ER
AN0596.1	Damage-specific DNA binding complex, subunit DDB1	L	Replication, recombination, repair
AN0597.1	Molecular chaperone (DnaJ superfamily)	O	Posttranslational modification/turnover/chaperones
AN0600.1	hypothetical protein ( (AL513467) conserved hypothetical protein [Neurospora crassa] )
AN0604.1	UV damage repair endonuclease	L	Replication, recombination, repair
AN0605.1	Uncharacterized conserved protein	S
AN0606.1	Cytochrome P450 CYP2 subfamily	Q
AN0607.1	Non-ribosomal peptide synthetase/alpha-aminoadipate reductase and related enzymes	Q
AN0609.1	Acyl-CoA synthetases (AMP-forming)/AMP-acid ligases II	IQ
AN0623.1	Choline dehydrogenase and related flavoproteins	E	Amino acid transport, metabolism
AN0624.1	Hypothetical ORF; Ydr132cp [Saccharomyces cerevisiae]
AN0625.1	Proliferation-associated nucleolar protein (NOL1)	D	Cell cycle/division, chrom. partitioning	YNL022C	nucleolus cytoplasm nucleus
AN0627.1	FYVE finger containing protein	R
AN0628.1	Lactate dehydrogenase and related dehydrogenases	CHR
AN0629.1	Glutathione S-transferase	O	Posttranslational modification/turnover/chaperones	YIR038C
AN0631.1	Transcriptional co-repressor component	K	Transcription
AN0632.1	U5 snRNP-associated RNA splicing factor	A	RNA processing, modification
AN0633.1	cDNA sequence BC010311 [Mus musculus]
AN0634.1	GTP-binding ADP-ribosylation factor-like protein yARL3	U	Intracellular trafficking/secretion/transport
AN0635.1	predicted protein [Neurospora crassa]
AN0636.1	N-acetylglucosaminyltransferase complex, subunit PIG-A/SPT14, required for phosphatidylinositol biosynthesis/Sulfolipid synthase	MOI		YPL175W
AN0638.1	predicted protein [Neurospora crassa]
AN0640.1	Sphingolipid hydroxylase	I	Lipid transport, metabolism
AN0641.1	Microtubule-binding protein (translationally controlled tumor protein)	DZ		YKL056C	cytoplasm
AN0642.1	Signal recognition particle, subunit Srp19	U	Intracellular trafficking/secretion/transport
AN0644.1	putative zinc finger transcription factor [Aspergillus fumigatus]
AN0646.1	RNA helicase nonsense mRNA reducing factor (pNORF1)	A	RNA processing, modification	YMR080C	cytoplasm
AN0647.1	U3 small nucleolar ribonucleoprotein (snoRNP) component	A	RNA processing, modification	YNL075W
AN0649.1	Acyl-CoA synthetase	I	Lipid transport, metabolism
AN0651.1	G-protein alpha subunit (small G protein superfamily)	DT
AN0653.1	Predicted MutS-related protein involved in mismatch repair	L	Replication, recombination, repair	YPL199C	cytoplasm
AN0654.1	Geranylgeranyl pyrophosphate synthase/Polyprenyl synthetase	H	Coenzyme transport, metabolism	YPL069C	mitochondrion
AN0655.1	hypothetical protein [Neurospora crassa]
AN0657.1	Translocase of outer mitochondrial membrane complex, subunit TOM37/Metaxin 1	U	Intracellular trafficking/secretion/transport
AN0659.1	predicted protein [Neurospora crassa]
AN0660.1	Uridine permease/thiamine transporter/allantoin transport	FH
AN0661.1	unknown [Leptosphaeria maculans]
AN0662.1	Adenine deaminase/adenosine deaminase	F	Nucleotide transport, metabolism
AN0664.1	Phosphoinositide-specific phospholipase C	T	Signal transduction mechanisms
AN0665.1	Vesicle coat complex COPI, epsilon subunit	U	Intracellular trafficking/secretion/transport
AN0667.1	Mannose-6-phosphate isomerase	G	Carbohydrate transport, metabolism	YER003C	cytoplasm nucleus
AN0668.1	Histone acetyltransferase SAGA associated factor SGF29	R
AN0670.1	Bifunctional GTP cyclohydrolase II/3,4-dihydroxy-2butanone-4-phosphate synthase	H	Coenzyme transport, metabolism	YBL033C	cytoplasm nucleus
AN0671.1	predicted protein [Neurospora crassa]
AN0672.1	3-hydroxyisobutyrate dehydrogenase and related beta-hydroxyacid dehydrogenases	I	Lipid transport, metabolism
AN0673.1	Actin-related protein Arp2/3 complex, subunit Arp2	Z	Cytoskeleton	YDL029W
AN0675.1	Predicted oxidoreductases (related to aryl-alcohol dehydrogenases)	C	Energy production, conversion
AN0676.1	Gamma tubulin	Z	Cytoskeleton	YLR212C	spindle pole
AN0679.1	Phosphotyrosyl phosphatase activator	DT
AN0681.1	Cystathionine beta-lyases/cystathionine gamma-synthases	E	Amino acid transport, metabolism	YHR112C	cytoplasm
AN0682.1
AN0684.1	Nucleolar GTPase/ATPase p130	Y	Nuclear structure
AN0685.1	Hypothetical ORF; Ylr063wp [Saccharomyces cerevisiae]			YLR063W	cytoplasm
AN0686.1	Prohibitin	O	Posttranslational modification/turnover/chaperones	YGR132C	mitochondrion
AN0687.1	Spermidine synthase	E	Amino acid transport, metabolism	YPR069C	cytoplasm nucleus
AN0688.1	Transketolase	G	Carbohydrate transport, metabolism	YPR074C	cytoplasm nucleus
AN0689.1	acetate regulatory DNA binding protein FacB [Emericella nidulans]
AN0690.1	N-methyltransferase	R
AN0691.1
AN0693.1	hypothetical protein ( (AL513462) putative protein [Neurospora crassa] )
AN0694.1
AN0696.1	Mitotic checkpoint protein MAD1	D	Cell cycle/division, chrom. partitioning
AN0697.1	RhoA GTPase effector DIA/Diaphanous	TZ
AN0699.1	Protein kinase PCTAIRE and related kinases	R
AN0700.1	Predicted membrane protein	S		YGL114W
AN0703.1	RAVE (regulator of V-ATPase assembly) complex subunit RAV1/DMX protein, WD repeat superfamily	R		YJR033C
AN0704.1	Uncharacterized protein SFI1 involved in G(2)-M transition	D	Cell cycle/division, chrom. partitioning	YLL003W	spindle pole
AN0705.1	Isoleucyl-tRNA synthetase	J	Translation, ribosomal structure, biogenesis	YBL076C	cytoplasm
AN0706.1	ER-Golgi vesicle-tethering protein p115	U	Intracellular trafficking/secretion/transport
AN0707.1	5'-3' exonuclease HKE1/RAT1	LA		YOR048C	nucleus
AN0709.1	FOG: Zn-finger	R
AN0714.1	U1-like Zn-finger protein	R
AN0716.1	Uncharacterized conserved protein	S
AN0717.1	Histidinol phosphate aminotransferase	E	Amino acid transport, metabolism	YIL116W	cytoplasm
AN0719.1	Histone acetyltransferase PCAF/SAGA, subunit SUPT3H/SPT3	K	Transcription	YDR392W	nucleus
AN0720.1	Diphthine synthase	J	Translation, ribosomal structure, biogenesis	YLR172C	cytoplasm
AN0723.1	hypothetical protein [Neurospora crassa]
AN0724.1	Permease of the major facilitator superfamily	R
AN0725.1	Spindle pole body protein	Z	Cytoskeleton
AN0726.1	beta-1,6-N-acetylglucosaminyltransferase, contains WSC domain	GO		YMR244W
AN0727.1	Putative u4/u6 small nuclear ribonucleoprotein	A	RNA processing, modification
AN0728.1	Uncharacterized conserved protein	S
AN0729.1	Mannosyltransferase	MU
AN0730.1	Uncharacterized conserved protein	S
AN0731.1	Peroxisomal membrane protein MPV17 and related proteins	R
AN0732.1	Synaptic vesicle transporter SVOP and related transporters (major facilitator superfamily)	R
AN0733.1	Histones H3 and H4	B	Chromatin structure, dynamics	YNL031C
AN0734.1	Histone H4	B	Chromatin structure, dynamics
AN0746.1	Nucleoside-diphosphate-sugar epimerases	MG
AN0747.1	Mitochondrial processing peptidase, beta subunit, and related enzymes (insulinase superfamily)	O	Posttranslational modification/turnover/chaperones	YLR163C	mitochondrion
AN0751.1	predicted protein [Neurospora crassa]
AN0756.1	Beta-galactosidase	G	Carbohydrate transport, metabolism
AN0757.1	tRNA cytosine-5-methylases and related enzymes of the NOL1/NOP2/sun superfamily	J	Translation, ribosomal structure, biogenesis
AN0762.1	Transcription factor/CCAAT displacement protein CDP1	K	Transcription	YKL179C	lipid particle
AN0764.1	Protocatechuate 3,4-dioxygenase beta subunit	Q
AN0765.1	Flavonol reductase/cinnamoyl-CoA reductase	V	Defense mechanisms
AN0766.1	hypothetical protein [Novosphingobium aromaticivorans]
AN0768.1	Secreted and surface protein containing fasciclin-like repeats	M
AN0770.1	Predicted regulator of the ubiquitin pathway (contains UAS and UBX domains)	T	Signal transduction mechanisms
AN0771.1	Pleiotropic drug resistance proteins (PDR1-15), ABC superfamily	Q		YOR153W	cell periphery
AN0772.1	Dehydrogenases with different specificities (related to short-chain alcohol dehydrogenases)	IQR
AN0773.1	Ferric reductase, NADH/NADPH oxidase and related proteins	PQ		YLR214W
AN0774.1	Sorbitol dehydrogenase	Q
AN0775.1	Glyoxylate/hydroxypyruvate reductase (D-isomer-specific 2-hydroxy acid dehydrogenase superfamily)	C	Energy production, conversion
AN0776.1	60S ribosomal protein L22	J	Translation, ribosomal structure, biogenesis	YKL180W	cytoplasm
AN0778.1	beta-1,6-N-acetylglucosaminyltransferase, contains WSC domain	GO
AN0780.1	Aromatic amino acid aminotransferase and related proteins	E	Amino acid transport, metabolism	YER152C	cytoplasm nucleus
AN0781.1	Atu related protein [imported] - Neurospora crassa
AN0782.1	Ankyrin	M
AN0787.1	Mannosyl-oligosaccharide alpha-1,2-mannosidase and related glycosyl hydrolases	G	Carbohydrate transport, metabolism
AN0794.1	Transcription initiation factor TFIID, subunit TAF9 (also component of histone acetyltransferase SAGA)	K	Transcription
AN0796.1	Uncharacterized conserved protein	S
AN0797.1	Histidinol dehydrogenase	E	Amino acid transport, metabolism	YCL030C	cytoplasm
AN0802.1	Protein involved in plasmid maintenance/nuclear protein involved in lipid metabolism	NI
AN0803.1	Unnamed protein	X
AN0804.1	Uncharacterized conserved protein	S		YGR024C	cytoplasm nucleus
AN0806.1	WD40 repeat protein	R		YNL035C	nucleus
AN0807.1	predicted protein [Neurospora crassa]
AN0808.1	WD40 repeat protein	R		YAR003W	nucleus
AN0809.1	RNA polymerase II, large subunit	K	Transcription	YDL140C	nucleus
AN0810.1	Extracellular protein SEL-1 and related proteins	MOT
AN0811.1	Permease of the major facilitator superfamily	G	Carbohydrate transport, metabolism	YJR152W
AN0812.1	Beta-glucosidase, lactase phlorizinhydrolase, and related proteins	G	Carbohydrate transport, metabolism
AN0813.1	Kelch repeat-containing proteins	R
AN0814.1	Anaphase promoting complex, Cdc20, Cdh1, and Ama1 subunits	DO		YGL116W	cytoplasm nucleus
AN0815.1	Failed axon connections (fax) protein/glutathione S-transferase-like protein	T	Signal transduction mechanisms
AN0816.1	RNA polymerase II transcription initiation factor TFIIA, large chain	K	Transcription
AN0817.1	Putative transcriptional repressor regulating G2/M transition	KD
AN0818.1	Uncharacterized conserved protein	R		YLR401C	cytoplasm nucleus
AN0819.1	B-cell receptor-associated protein and related proteins	V	Defense mechanisms	YDL072C	ER
AN0821.1	hypothetical protein [Neurospora crassa]
AN0822.1	Serine/threonine protein kinase	T	Signal transduction mechanisms
AN0823.1	Uncharacterized conserved protein	S
AN0824.1	Short-chain acyl-CoA dehydrogenase	I	Lipid transport, metabolism
AN0827.1	Uncharacterized membrane protein	S		YJL091C	ER
AN0828.1	Amidases	J	Translation, ribosomal structure, biogenesis
AN0829.1	Low-affinity cAMP phosphodiesterase	T	Signal transduction mechanisms
AN0831.1	SPRY domain-containing proteins	R
AN0832.1	Putative metallopeptidase	R
AN0834.1	Molecular chaperone (DnaJ superfamily)	O	Posttranslational modification/turnover/chaperones	YOR254C	ER
AN0836.1	D-arabinono-1, 4-lactone oxidase	V	Defense mechanisms	YML086C	mitochondrion
AN0837.1	Splicing coactivator SRm160/300, subunit SRm300	A	RNA processing, modification
AN0838.1	ATP-dependent RNA helicase	A	RNA processing, modification
AN0840.1	Alpha-isopropylmalate synthase/homocitrate synthase	E	Amino acid transport, metabolism	YNL104C	mitochondrion cytoplasm
AN0842.1	Predicted AMP-binding protein	R		YOR093C
AN0843.1	Ribosomal protein S7	J	Translation, ribosomal structure, biogenesis	YJR123W
AN0846.1	predicted protein [Neurospora crassa]
AN0847.1	Molecular chaperones GRP170/SIL1, HSP70 superfamily	O	Posttranslational modification/turnover/chaperones
AN0848.1	hypothetical protein [Neurospora crassa]
AN0849.1	Dystonin, GAS (Growth-arrest-specific protein), and related proteins	Z	Cytoskeleton
AN0854.1	Splicing coactivator SRm160/300, subunit SRm300	A	RNA processing, modification
AN0855.1	DNA repair protein, SNF2 family	L	Replication, recombination, repair	YBR073W	nucleus
AN0856.1	Amino acid transporters	E	Amino acid transport, metabolism
AN0857.1	predicted protein [Neurospora crassa]
AN0858.1	Chaperone HSP104 and related ATP-dependent Clp proteases	O	Posttranslational modification/turnover/chaperones	YLL026W	cytoplasm
AN0860.1	predicted protein [Neurospora crassa]
AN0861.1	predicted protein [Neurospora crassa]
AN0862.1	Molecular chaperone Prefoldin, subunit 4	O	Posttranslational modification/turnover/chaperones	YNL153C	cytoplasm
AN0864.1	hypothetical protein ( (AL451014) hypothetical protein [Neurospora crassa] )
AN0865.1	Putative trehalase	G	Carbohydrate transport, metabolism	YNL092W
AN0866.1	Molecular chaperones HSP70/HSC70, HSP70 superfamily	O	Posttranslational modification/turnover/chaperones
AN0867.1	hypothetical protein [Neurospora crassa]
AN0868.1	Acyl-CoA thioesterase	I	Lipid transport, metabolism
AN0869.1
AN0870.1	Mitochondrial phosphate carrier protein	C	Energy production, conversion	YJR077C	mitochondrion
AN0871.1	Gpi-anchor transamidase	O	Posttranslational modification/turnover/chaperones	YDR331W	ER
AN0872.1	CDC45 (cell division cycle 45)-like protein	L	Replication, recombination, repair
AN0873.1	Predicted dehydrogenase	R
AN0874.1	Poly(A) polymerase and related nucleotidyltransferases	A	RNA processing, modification	YKR002W	nucleus
AN0876.1	Conserved protein/domain typically associated with flavoprotein oxygenases, DIM6/NTAB family	R
AN0877.1	hypothetical protein ( related to pathway-specific nitrogen regulator [imported] - Neurospora crassa )
AN0879.1	Uncharacterized conserved protein	S
AN0880.1	Peroxisomal targeting signal type 2 receptor	U	Intracellular trafficking/secretion/transport	YDR142C
AN0881.1	Alkylated DNA repair protein	L	Replication, recombination, repair
AN0885.1	Transcription factor MEIS1 and related HOX domain proteins	K	Transcription
AN0886.1	Uncharacterized proteins, homologs of lactam utilization protein B	R
AN0888.1	Uncharacterized conserved protein, contains JmjC domain	BT
AN0889.1	Predicted GTP-binding protein (ODN superfamily)	R		YHR168W
AN0891.1	Positive regulator of purine utilization
AN0892.1	Molecular chaperone (DnaJ superfamily)	O	Posttranslational modification/turnover/chaperones
AN0893.1	Adenylosuccinate synthase	F	Nucleotide transport, metabolism	YNL220W	cytoplasm
AN0894.1	ATP-dependent RNA helicase pitchoune	A	RNA processing, modification
AN0895.1	Predicted NAD-dependent oxidoreductase	R
AN0896.1	Succinate dehydrogenase membrane anchor subunit and related proteins	CU		YLR164W
AN0897.1	Predicted nucleic acid-binding protein ASMTL	D	Cell cycle/division, chrom. partitioning
AN0899.1	Nucleolar GTPase/ATPase p130	Y	Nuclear structure
AN0901.1	Multicopper oxidases	Q
AN0902.1	predicted protein [Neurospora crassa]
AN0903.1	hypothetical protein [Neurospora crassa]
AN0904.1	predicted protein [Neurospora crassa]
AN0905.1	Anaphase-promoting complex (APC), subunit 4	DO
AN0906.1	Karyopherin (importin) beta 1	YU		YLR347C	nuclear periphery cytoplasm
AN0907.1	40S ribosomal protein S15/S22	J	Translation, ribosomal structure, biogenesis	YJL190C	nucleolus nucleus
AN0909.1	hypothetical protein ( (AL451014) putative protein [Neurospora crassa] )
AN0910.1	Phosphatidylserine decarboxylase	I	Lipid transport, metabolism	YNL169C	mitochondrion
AN0912.1	3-isopropylmalate dehydrogenase	E	Amino acid transport, metabolism	YCL018W
AN0913.1	Phosphatidylinositol synthase	I	Lipid transport, metabolism	YPR113W	ER
AN0914.1	Serine/threonine protein phosphatase	T	Signal transduction mechanisms
AN0917.1	Transcriptional coactivator CAPER (RRM superfamily)	K	Transcription
AN0918.1	Sphingolipid fatty acid hydroxylase	I	Lipid transport, metabolism	YMR272C	ER
AN0919.1	Uridine 5'- monophosphate synthase/orotate phosphoribosyltransferase	F	Nucleotide transport, metabolism
AN0920.1	predicted protein [Neurospora crassa]
AN0922.1	Medium subunit of clathrin adaptor complex	U	Intracellular trafficking/secretion/transport
AN0923.1	AAA ATPase containing von Willebrand factor type A (vWA) domain	R
AN0924.1	Uncharacterized conserved protein	S
AN0925.1	Phosphoinositide phosphatase SAC1	I	Lipid transport, metabolism
AN0926.1	Nuclear transport receptor Karyopherin-beta2/Transportin (importin beta superfamily)	YU		YBR017C	cytoplasm nucleus
AN0927.1	Ubiquitin C-terminal hydrolase	O	Posttranslational modification/turnover/chaperones
AN0928.1	hypothetical protein ( (AL451014) putative protein [Neurospora crassa] )
AN0929.1	Choline kinase	M		YLR133W	cytoplasm
AN0930.1	Predicted membrane protein	S
AN0931.1	Mitogen-activated protein kinase kinase (MAP2K)	T	Signal transduction mechanisms
AN0932.1	Pyridine nucleotide-disulphide oxidoreductase	Q		YPL091W	mitochondrion cytoplasm nucleus
AN0934.1
AN0936.1	Threonyl-tRNA synthetase	J	Translation, ribosomal structure, biogenesis	YKL194C	mitochondrion
AN0937.1	NITROGEN ASSIMILATION TRANSCRIPTION FACTOR NIT-4 [Neurospora crassa]
AN0938.1	Predicted transporter (major facilitator superfamily)	R
AN0939.1	Predicted metal-dependent hydrolase of the TIM-barrel fold	R
AN0941.1	Maltase glucoamylase and related hydrolases, glycosyl hydrolase family 31	G	Carbohydrate transport, metabolism
AN0942.1	Sorbitol dehydrogenase	Q
AN0943.1	Mitochondrial F1F0-ATP synthase, subunit g/ATP20	C	Energy production, conversion	YPR020W	mitochondrion
AN0944.1	ATP-dependent RNA helicase	A	RNA processing, modification	YGL171W
AN0945.1	Vacuolar sorting protein VPS28	U	Intracellular trafficking/secretion/transport
AN0946.1	Predicted protein involved in nuclear export of pre-ribosomes	J	Translation, ribosomal structure, biogenesis	YOR206W	nucleolus nucleus
AN0947.1	Molybdenum cofactor biosynthesis pathway protein	H	Coenzyme transport, metabolism
AN0949.1	Sterol desaturase	I	Lipid transport, metabolism
AN0951.1	Predicted metal-dependent hydrolase (beta-lactamase superfamily)	R
AN0953.1	Predicted small GTPase involved in nuclear protein import	U	Intracellular trafficking/secretion/transport	YGR163W	vacuolar membrane
AN0954.1	Predicted heme/steroid binding protein	R
AN0955.1	40S ribosomal protein S25	J	Translation, ribosomal structure, biogenesis
AN0956.1	tRNA-dihydrouridine synthase	J	Translation, ribosomal structure, biogenesis
AN0957.1	predicted protein [Neurospora crassa]
AN0960.1	G4P04 [Emericella nidulans]
AN0966.1	Uncharacterized conserved protein BCNT	S
AN0973.1	FOG: Zn-finger	R
AN0977.1	predicted protein [Neurospora crassa]
AN0978.1	Translation initiation factor 2B, gamma subunit (eIF-2Bgamma/GCD1)	J	Translation, ribosomal structure, biogenesis
AN0979.1	Nucleolar GTPase/ATPase p130	Y	Nuclear structure
AN0980.1	Beta-galactosidase	G	Carbohydrate transport, metabolism
AN0981.1	Long chain fatty acid elongase	I	Lipid transport, metabolism
AN0982.1	WASP-interacting protein VRP1/WIP, contains WH2 domain	Z	Cytoskeleton
AN0984.1	Uncharacterized conserved protein	S		YOR243C	nucleus
AN0986.1	PHD Zn-finger proteins	R
AN0987.1	hypothetical protein [Neurospora crassa]
AN0988.1	LAMMER dual specificity kinases	T	Signal transduction mechanisms
AN0989.1	SWI-SNF chromatin-remodeling complex protein	B	Chromatin structure, dynamics
AN0990.1	mRNA cleavage and polyadenylation factor II complex, BRR5 (CPSF subunit)	A	RNA processing, modification	YLR277C	nucleus
AN0991.1	Adenosylmethionine-8-amino-7-oxononanoate aminotransferase	H	Coenzyme transport, metabolism
AN0993.1	Permease of the major facilitator superfamily	G	Carbohydrate transport, metabolism
AN0994.1	Dual specificity phosphatase	V	Defense mechanisms
AN0997.1	Ribonuclease III domain proteins	J	Translation, ribosomal structure, biogenesis	YMR024W	mitochondrion
AN0998.1	hypothetical protein [Neurospora crassa]			YCR019W
AN1001.1	Uncharacterized conserved protein	S
AN1002.1	Sec5 subunit of exocyst complex	U	Intracellular trafficking/secretion/transport	YDR166C	cell periphery bud neck bud
AN1003.1	Isocitrate dehydrogenase, alpha subunit	E	Amino acid transport, metabolism	YOR136W	mitochondrion
AN1005.1	Gamma-tubulin complex, DGRIP91/SPC98 component	Z	Cytoskeleton
AN1006.1	Sulfite oxidase, molybdopterin-binding component	C	Energy production, conversion
AN1007.1	NAD(P)H-nitrite reductase	C	Energy production, conversion
AN1008.1	Nitrate/nitrite transporter	P	Inorganic ion transport, metabolism
AN1009.1	Uncharacterized conserved protein	S
AN1010.1	hypothetical protein [Aspergillus fumigatus]
AN1012.1	Predicted hydrolase (HAD superfamily)	R
AN1013.1	60S ribosomal protein L5	J	Translation, ribosomal structure, biogenesis	YPL131W	cytoplasm
AN1014.1	Peroxisomal long-chain acyl-CoA transporter, ABC superfamily	I	Lipid transport, metabolism	YKL188C
AN1015.1	Glycogen phosphorylase	G	Carbohydrate transport, metabolism	YPR160W	cytoplasm
AN1016.1	G-protein alpha subunit (small G protein superfamily)	DT		YER020W	cell periphery
AN1017.1	Mitogen-activated protein kinase	T	Signal transduction mechanisms	YLR113W	cytoplasm
AN1018.1	Uncharacterized conserved protein	S
AN1019.1	Cullins	D	Cell cycle/division, chrom. partitioning	YDL132W	cytoplasm nucleus
AN1020.1	Uncharacterized protein containing double-stranded beta helix domain	S
AN1021.1	hypothetical protein [Aspergillus fumigatus]
AN1022.1	Uncharacterized conserved protein	S
AN1023.1	Synaptic vesicle protein EHS-1 and related EH domain proteins	TU		YNL084C
AN1024.1	Chromatin remodeling complex WSTF-ISWI, small subunit	K	Transcription	YFR038W
AN1025.1	Chimaerin and related Rho GTPase activating proteins	T	Signal transduction mechanisms
AN1026.1	hypothetical protein [Neurospora crassa]
AN1027.1
AN1028.1	predicted protein [Neurospora crassa]
AN1037.1	Fatty acid desaturase	I	Lipid transport, metabolism
AN1038.1	Putative transmembrane protein	R
AN1039.1	HLH transcription factor EBF/Olf-1 and related DNA binding proteins	K	Transcription
AN1041.1	Ca2+-modulated nonselective cation channel polycystin	PT
AN1045.1	FOG: RRM domain	R
AN1047.1	Molecular chaperones HSP105/HSP110/SSE1, HSP70 superfamily	O	Posttranslational modification/turnover/chaperones	YBR169C	cytoplasm
AN1048.1	hypothetical protein [Neurospora crassa]
AN1049.1	Protein involved in sister chromatid separation and/or segregation	D	Cell cycle/division, chrom. partitioning
AN1050.1	3-oxoacyl CoA thiolase	I	Lipid transport, metabolism
AN1051.1	DNA repair protein RHP57	L	Replication, recombination, repair
AN1052.1	von Willebrand factor and related coagulation proteins	WV
AN1053.1	Splicing coactivator SRm160/300, subunit SRm160 (contains PWI domain)	AR
AN1054.1	hypothetical protein [Aspergillus fumigatus]
AN1056.1	Predicted NTPase (NACHT family)	T	Signal transduction mechanisms
AN1057.1	Highly conserved protein containing a thioredoxin domain	R
AN1058.1	Defense-related protein containing SCP domain	S
AN1059.1	Carnitine O-acyltransferase CPT2/YAT1	I	Lipid transport, metabolism	YAR035W
AN1060.1	DNA damage-responsive repressor GIS1/RPH1, jumonji superfamily	L	Replication, recombination, repair
AN1061.1	Amino acid transporters	E	Amino acid transport, metabolism	YKL174C
AN1062.1	possible endozepine [Aspergillus fumigatus]
AN1063.1	NADH:ubiquinone oxidoreductase, NDUFA8/PGIV/19 kDa subunit	C	Energy production, conversion
AN1065.1	Uncharacterized conserved protein	S		YPR133C
AN1066.1	hypothetical protein [Aspergillus fumigatus]			YNR018W	mitochondrion
AN1068.1	predicted protein [Neurospora crassa]
AN1069.1	hypothetical protein [Neurospora crassa]			YHR142W	vacuole bud neck cytoplasm bud
AN1073.1	H+/oligopeptide symporter	E	Amino acid transport, metabolism
AN1074.1	Glycine cleavage system H protein (lipoate-binding)	E	Amino acid transport, metabolism	YAL044C	mitochondrion
AN1075.1	Predicted E3 ubiquitin ligase	O	Posttranslational modification/turnover/chaperones	YKL034W
AN1076.1	Putative Zn2+ transporter MSC2 (cation diffusion facilitator superfamily)	P	Inorganic ion transport, metabolism
AN1080.1	Predicted mRNA cap-binding protein related to eIF-4E	J	Translation, ribosomal structure, biogenesis
AN1082.1	Nucleoside phosphatase	F	Nucleotide transport, metabolism	YEL042W	Golgi
AN1083.1	Translation initiation factor 3 (IF-3)	J	Translation, ribosomal structure, biogenesis
AN1084.1	Mitochondrial translation elongation factor Tu	J	Translation, ribosomal structure, biogenesis	YOR187W	mitochondrion
AN1085.1	GTP-binding protein	R		YOR165W
AN1086.1	Predicted thioesterase	R
AN1087.1	Cytochrome P450	Q
AN1089.1	Thioredoxin binding protein TBP-2/VDUP1	R
AN1090.1	Transcription factor BarH and related HOX domain proteins	R
AN1091.1	FOG: RRM domain	R
AN1092.1	Glucosamine 6-phosphate synthetases, contain amidotransferase and phosphosugar isomerase domains	M		YNL191W	cytoplasm
AN1093.1	Vacuolar sorting protein VPS1, dynamin, and related proteins	UR		YOR211C
AN1094.1	NADH-dehydrogenase (ubiquinone)	C	Energy production, conversion	YMR145C	mitochondrion
AN1095.1	Mitochondrial/chloroplast ribosomal protein L15/L10	J	Translation, ribosomal structure, biogenesis
AN1096.1	von Willebrand factor and related coagulation proteins	WV
AN1097.1	Serine/threonine protein kinase	T	Signal transduction mechanisms
AN1099.1	FOG: Immunoglobin and related proteins	RP
AN1102.1	Serine palmitoyltransferase	O	Posttranslational modification/turnover/chaperones	YDR062W	ER
AN1103.1	Acyl-CoA synthetase	I	Lipid transport, metabolism
AN1104.1	Mitochondrial processing peptidase, alpha subunit	O	Posttranslational modification/turnover/chaperones
AN1105.1	Translocase of outer mitochondrial membrane complex, subunit TOM22	U	Intracellular trafficking/secretion/transport	YNL131W
AN1106.1	Heterochromatin-associated protein HP1 and related CHROMO domain proteins	B	Chromatin structure, dynamics
AN1109.1	Predicted transporter (major facilitator superfamily)	R
AN1110.1	Permease of the major facilitator superfamily	G	Carbohydrate transport, metabolism
AN1111.1	Flavin-containing monooxygenase	Q
AN1114.1	Predicted DNA-binding protein	K	Transcription
AN1115.1	Predicted inosine-uridine preferring nucleoside hydrolase	F	Nucleotide transport, metabolism
AN1116.1	Transcription regulator XNP/ATRX, DEAD-box superfamily	K	Transcription
AN1117.1	Putative cargo transport protein ERV29	U	Intracellular trafficking/secretion/transport	YGR284C	ER
AN1118.1	predicted protein [Neurospora crassa]
AN1121.1	predicted protein [Neurospora crassa]
AN1122.1	60S ribosomal protein L10A	J	Translation, ribosomal structure, biogenesis	YPL220W	cytoplasm
AN1126.1	GTP-binding ADP-ribosylation factor Arf1	U	Intracellular trafficking/secretion/transport	YDL137W	late Golgi early Golgi
AN1128.1	predicted protein [Neurospora crassa]
AN1129.1	Predicted flavoprotein involved in K+ transport	P	Inorganic ion transport, metabolism
AN1131.1	hypothetical protein ( related to cytosolic Cu/Zn superoxide dismutase [imported] - Neurospora crassa )
AN1132.1	Pentafunctional AROM protein	E	Amino acid transport, metabolism
AN1133.1	N-methyl-D-aspartate receptor glutamate-binding subunit	T	Signal transduction mechanisms	YNL305C	vacuole
AN1134.1	QUINIC ACID UTILIZATION ACTIVATOR
AN1135.1	3-dehydroquinate dehydratase II	E	Amino acid transport, metabolism
AN1136.1	Inositol monophosphatase	G	Carbohydrate transport, metabolism	YDR287W
AN1137.1	Shikimate 5-dehydrogenase	E	Amino acid transport, metabolism
AN1138.1	Predicted transporter (major facilitator superfamily)	R
AN1139.1	Predicted dehydrogenases and related proteins	R
AN1140.1	Sugar phosphate isomerases/epimerases	G	Carbohydrate transport, metabolism
AN1146.1	Mitochondrial Fe2+ transporter MMT1 and related transporters (cation diffusion facilitator superfamily)	P	Inorganic ion transport, metabolism
AN1148.1	Acid sphingomyelinase and PHM5 phosphate metabolism protein	I	Lipid transport, metabolism	YDR452W	vacuole
AN1150.1	Acetylornithine aminotransferase	E	Amino acid transport, metabolism	YOL140W	mitochondrion
AN1151.1	3-carboxymuconate cyclase	G	Carbohydrate transport, metabolism
AN1153.1	Spherulin 1A precursor
AN1155.1	Exo-beta-1,3-glucanase	G	Carbohydrate transport, metabolism	YGR282C	vacuole
AN1156.1	Myosin class II heavy chain	Z	Cytoskeleton
AN1157.1	Nuclear-export-signal (NES)-containing protein/polyadenylated-RNA export factor	A	RNA processing, modification
AN1158.1	Exosomal 3'-5' exoribonuclease complex, subunit Rrp44/Dis3	J	Translation, ribosomal structure, biogenesis	YDR293C	cytoplasm
AN1162.1	Elongation factor 1 beta/delta chain	K	Transcription	YAL003W
AN1163.1	Chaperone HSP104 and related ATP-dependent Clp proteases	O	Posttranslational modification/turnover/chaperones	YDR258C	mitochondrion
AN1164.1	Disrupter of silencing SAS10	B	Chromatin structure, dynamics
AN1165.1	Predicted 3-ketosphinganine reductase	Q		YBR265W	ER
AN1166.1	60s ribosomal protein L6	J	Translation, ribosomal structure, biogenesis	YLR448W	cytoplasm
AN1167.1	Cell membrane glycoprotein	R
AN1168.1	Voltage-gated Ca2+ channels, alpha1 subunits	PT		YGR217W	cytoplasm
AN1170.1	Proteins containing SET domain	R
AN1171.1	Serine/threonine protein kinase	T	Signal transduction mechanisms
AN1175.1	Nucleolar protein NOP52/RRP1	A	RNA processing, modification
AN1176.1	Sphingosine kinase, involved in sphingolipid metabolism	IT		YOR171C
AN1177.1	Vesicle coat complex COPI, beta subunit	U	Intracellular trafficking/secretion/transport	YDR238C	Golgi early Golgi
AN1179.1	Vacuolar import and degradation protein	U	Intracellular trafficking/secretion/transport	YBR105C	cytoplasm nucleus
AN1180.1	MAPKKK (MAP kinase kinase kinase) SSK2 and related serine/threonine protein kinases	T	Signal transduction mechanisms
AN1181.1	Ammonia permease	P	Inorganic ion transport, metabolism	YNL142W	cell periphery
AN1182.1	Beta tubulin	Z	Cytoskeleton	YFL037W
AN1186.1	Purine-cytosine permease and related proteins	F	Nucleotide transport, metabolism
AN1187.1	hypothetical protein ( (AL451019) conserved hypothetical protein [Neurospora crassa] )
AN1188.1	Transcription elongation factor TAT-SF1	K	Transcription
AN1189.1	Calcium transporting ATPase	P	Inorganic ion transport, metabolism	YGL006W	vacuolar membrane
AN1190.1	Nuclear pore complex, rNup107 component (sc Nup84)	YU
AN1191.1	Ubiquitin-like proteins	O	Posttranslational modification/turnover/chaperones	YDR510W	cytoplasm nucleus
AN1193.1	Succinyl-CoA synthetase, beta subunit	C	Energy production, conversion
AN1194.1	Adenosine 5'-phosphosulfate kinase	P	Inorganic ion transport, metabolism	YKL001C	cytoplasm
AN1195.1	Vacuolar H+-ATPase V1 sector, subunit C	C	Energy production, conversion	YKL080W	vacuolar membrane
AN1196.1	Uncharacterized conserved protein	S		YBL095W	mitochondrion
AN1198.1	Aminomethyl transferase	E	Amino acid transport, metabolism	YDR019C	mitochondrion
AN1199.1	Amino acid transporters	E	Amino acid transport, metabolism
AN1200.1	CAATT-binding transcription factor/60S ribosomal subunit biogenesis protein	JK		YDR060W	nucleolus
AN1201.1	Prolyl-tRNA synthetase	J	Translation, ribosomal structure, biogenesis	YER087W
AN1202.1	ADP-ribose pyrophosphatase	F	Nucleotide transport, metabolism
AN1205.1	Molecular chaperone Prefoldin, subunit 5	O	Posttranslational modification/turnover/chaperones	YML094W	cytoplasm
AN1207.1	Origin recognition complex, subunit 1, and related proteins	L	Replication, recombination, repair
AN1208.1	Pleiotropic regulator 1	A	RNA processing, modification	YPL151C	cytoplasm nucleus
AN1209.1	26S proteasome regulatory complex, subunit PSMD10	O	Posttranslational modification/turnover/chaperones	YGR232W	cytoplasm nucleus
AN1210.1	Transcription factor TMF, TATA element modulatory factor	K	Transcription	YJR134C	Golgi early Golgi
AN1211.1	Vacuolar H+-ATPase V1 sector, subunit H	C	Energy production, conversion
AN1212.1
AN1213.1	Dystonin, GAS (Growth-arrest-specific protein), and related proteins	Z	Cytoskeleton
AN1215.1	GTPase	R		YER006W	nucleolus nucleus
AN1216.1	Predicted haloacid-halidohydrolase and related hydrolases	R		YIL053W	cytoplasm nucleus
AN1218.1	Predicted phosphoglycerate mutase	G	Carbohydrate transport, metabolism
AN1219.1	Vesicle coat complex COPII, subunit SFB3	U	Intracellular trafficking/secretion/transport
AN1221.1	Serine/threonine protein kinase	T	Signal transduction mechanisms
AN1222.1	S-adenosylmethionine synthetase	H	Coenzyme transport, metabolism	YDR502C
AN1226.1	Sirtuin 5 and related class III sirtuins (SIR2 family)	BK
AN1229.1	SNARE protein GS28	U	Intracellular trafficking/secretion/transport	YHL031C
AN1230.1	Inner membrane protein required for assembly of the F0 sector of ATP synthase	O	Posttranslational modification/turnover/chaperones	YLR393W	mitochondrion
AN1231.1	DNA polymerase IV (family X)	L	Replication, recombination, repair
AN1232.1	predicted protein [Neurospora crassa]
AN1233.1	Nucleolar GTPase/ATPase p130	Y	Nuclear structure
AN1235.1	Puf family RNA-binding protein	J	Translation, ribosomal structure, biogenesis
AN1237.1	DNA repair protein RAD51/RHP55	L	Replication, recombination, repair	YER095W	cytoplasm nucleus
AN1238.1	hypothetical protein [Neurospora crassa]
AN1239.1	Uncharacterized conserved protein	S
AN1240.1	Multidrug resistance-associated protein/mitoxantrone resistance protein, ABC superfamily	Q
AN1243.1	Synaptic vesicle transporter SVOP and related transporters (major facilitator superfamily)	R
AN1244.1	Uncharacterized conserved protein	S		YKR018C	cytoplasm nucleus
AN1246.1	3-phosphoglycerate kinase	G	Carbohydrate transport, metabolism	YCR012W	cytoplasm nucleus
AN1247.1	Peroxisomal membrane protein MPV17 and related proteins	R		YOR292C	vacuole
AN1248.1	predicted protein [Neurospora crassa]
AN1249.1	Spliceosomal protein FBP11/Splicing factor PRP40	A	RNA processing, modification	YKL012W	nucleus
AN1251.1	FOG: Zn-finger	R
AN1254.1	FOG: Zn-finger	R
AN1255.1	Chromodomain-helicase DNA-binding protein	K	Transcription	YER164W	nucleus
AN1256.1	RNAse L inhibitor, ABC superfamily	A	RNA processing, modification	YDR091C	cytoplasm
AN1257.1	Glycosyl transferase, family 8 - glycogenin	G	Carbohydrate transport, metabolism
AN1258.1	predicted protein [Neurospora crassa]
AN1259.1	Cell cycle control protein (crooked neck)	D	Cell cycle/division, chrom. partitioning	YLR117C	nucleus
AN1260.1	mRNA splicing factor PRP31	A	RNA processing, modification
AN1261.1	hypothetical protein [Neurospora crassa]
AN1262.1
AN1263.1	S-adenosylhomocysteine hydrolase	H	Coenzyme transport, metabolism	YER043C	cytoplasm
AN1264.1	Dehydrogenases with different specificities (related to short-chain alcohol dehydrogenases)	IQR
AN1265.1	FOG: Zn-finger	R
AN1266.1	RNA helicase	A	RNA processing, modification	YBR237W	nucleus
AN1270.1	Translation initiation factor 3, subunit h (eIF-3h)	J	Translation, ribosomal structure, biogenesis
AN1272.1	Casein kinase II, beta subunit	TDK		YOR039W	cytoplasm nucleus
AN1275.1	Uncharacterized conserved protein	S
AN1276.1	Predicted transporter (major facilitator superfamily)	R
AN1280.1	Ribosomal protein S11	J	Translation, ribosomal structure, biogenesis
AN1281.1	Mitochondrial import inner membrane translocase, subunit TIM44	U	Intracellular trafficking/secretion/transport	YIL022W	mitochondrion
AN1282.1	TPR repeat-containing protein	R		YOR007C	cytoplasm
AN1283.1	WD40 repeat protein	R
AN1284.1	Predicted GTP-binding protein (ODN superfamily)	R		YBR025C	cytoplasm
AN1286.1	Histone transcription regulator HIRA, WD repeat superfamily	DK		YBL008W	cytoplasm nucleus
AN1287.1	Prohibitins and stomatins of the PID superfamily	C	Energy production, conversion
AN1288.1	RNA-binding protein LARP/SRO9 and related La domain proteins	OJ
AN1289.1	Uncharacterized conserved protein	S
AN1290.1	Predicted K+/H+-antiporter	P	Inorganic ion transport, metabolism	YJL094C
AN1292.1	Lipid phosphate phosphatase and related enzymes of the PAP2 family	I	Lipid transport, metabolism
AN1293.1	predicted protein [Neurospora crassa]
AN1296.1	hypothetical protein [Neurospora crassa]			YJL087C	cytoplasm
AN1297.1	Membrane protein involved in ER to Golgi transport	U	Intracellular trafficking/secretion/transport	YBL102W	early Golgi
AN1299.1	Mitochondrial oxodicarboxylate carrier protein	C	Energy production, conversion
AN1306.1	Actin regulatory proteins (gelsolin/villin family)	Z	Cytoskeleton
AN1309.1	Vacuolar sorting protein VPS1, dynamin, and related proteins	UR
AN1319.1	60S ribosomal protein 15.5kD/SNU13, NHP2/L7A family (includes ribonuclease P subunit p38), involved in splicing	AJ		YEL026W
AN1322.1	Vacuolar sorting protein VPS1, dynamin, and related proteins	UR
AN1324.1	Splicing coactivator SRm160/300, subunit SRm160 (contains PWI domain)	AR
AN1325.1	Protein interacting with poly(A)-binding protein	A	RNA processing, modification
AN1326.1	Protein kinase	R
AN1328.1	Subunit of the major N alpha-acetyltransferase	R		YHR013C	cytoplasm
AN1330.1	Defense-related protein containing SCP domain	S
AN1331.1	conserved hypothetical protein [Neurospora crassa]
AN1333.1	Dynein light chain	N
AN1334.1	Component of vacuolar transporter chaperone (Vtc) involved in vacuole fusion	UO		YER072W	ER
AN1335.1	G-protein beta subunit-like protein (contains WD40 repeats)	R		YNL006W
AN1336.1
AN1337.1	predicted protein [Neurospora crassa]
AN1339.1	Ubiquitin protein ligase RSP5/NEDD4	O	Posttranslational modification/turnover/chaperones	YER125W
AN1340.1	Splicing factor RNPS1, SR protein superfamily	A	RNA processing, modification
AN1341.1	Membrane coat complex Retromer, subunit VPS29/PEP11	U	Intracellular trafficking/secretion/transport
AN1342.1	Alanine-glyoxylate aminotransferase AGT1	R		YFL030W
AN1343.1	TFIIF-interacting CTD phosphatase, including NLI-interacting factor (involved in RNA polymerase II regulation)	K	Transcription
AN1344.1	Translation initiation factor 2B, beta subunit (eIF-2Bbeta/GCD7)	J	Translation, ribosomal structure, biogenesis	YLR291C	cytoplasm
AN1345.1	40S ribosomal protein S23	J	Translation, ribosomal structure, biogenesis	YPR132W	cytoplasm
AN1346.1	hypothetical protein [Neurospora crassa]
AN1348.1	Mitochondrial/chloroplast ribosomal protein L17	J	Translation, ribosomal structure, biogenesis	YJL063C	mitochondrion
AN1349.1	mRNA-binding protein Encore	A	RNA processing, modification
AN1350.1	Uncharacterized conserved protein	S
AN1352.1	Uncharacterized conserved protein	S		YNL024C-A
AN1354.1	Uncharacterized conserved protein	S		YIL091C	nucleolus nucleus
AN1355.1	Permease of the drug/metabolite transporter (DMT) superfamily	R		YMR253C	early Golgi
AN1356.1
AN1357.1	Phosphorylcholine transferase/cholinephosphate cytidylyltransferase	I	Lipid transport, metabolism
AN1358.1	Serine/threonine protein phosphatase	T	Signal transduction mechanisms	YBL056W	cytoplasm nucleus
AN1359.1	RTX toxins and related Ca2+-binding proteins	Q
AN1362.1	hypothetical protein [Neurospora crassa]
AN1363.1	DEAH-box RNA helicase	A	RNA processing, modification
AN1364.1	Thioredoxin-like protein	O	Posttranslational modification/turnover/chaperones
AN1366.1	Nuclear AAA ATPase (VCP subfamily)	O	Posttranslational modification/turnover/chaperones	YLL034C	nucleolus nucleus
AN1367.1	WD40 repeat nucleolar protein Bop1, involved in ribosome biogenesis	J	Translation, ribosomal structure, biogenesis	YMR049C	nucleolus nucleus
AN1369.1	Uncharacterized conserved protein	S
AN1370.1	Cell cycle-associated protein Mob1-1	D	Cell cycle/division, chrom. partitioning
AN1371.1	predicted protein [Neurospora crassa]
AN1372.1	Integral membrane protease of the rhomboid family involved in different forms of regulated intramembrane proteolysis	T	Signal transduction mechanisms
AN1374.1	Uncharacterized conserved protein	S
AN1375.1	predicted protein [Neurospora crassa]
AN1376.1	Phospholipid methyltransferase	I	Lipid transport, metabolism	YJR073C	vacuole ER
AN1378.1	predicted protein [Neurospora crassa]
AN1379.1	mRNA export protein (contains WD40 repeats)	A	RNA processing, modification	YER107C	nuclear periphery cytoplasm
AN1380.1	Methionyl-tRNA synthetase	J	Translation, ribosomal structure, biogenesis	YGR264C	cytoplasm
AN1381.1	Uncharacterized conserved protein	S
AN1382.1	hypothetical protein [Neurospora crassa]
AN1383.1	Regulator of ATP-sensitive K+ channels Alpha-endosulfine/ARPP-19 and related cAMP-regulated phosphoproteins	TU
AN1384.1	Serine carboxypeptidases (lysosomal cathepsin A)	OE
AN1385.1	WD40 repeat protein	R		YDR267C	cytoplasm
AN1386.1	SOK1 kinase belonging to the STE20/SPS1/GC kinase family	T	Signal transduction mechanisms
AN1387.1	FOG: WD40 repeat	R		YGL213C	cytoplasm
AN1390.1	Copper chaperone	P	Inorganic ion transport, metabolism	YNL259C	cytoplasm
AN1391.1	predicted protein [Neurospora crassa]
AN1394.1	Septin CDC10 and related P-loop GTPases	DTZ		YCR002C	cell periphery bud neck
AN1396.1	Glycerol-3-phosphate dehydrogenase	C	Energy production, conversion	YIL155C	mitochondrion
AN1397.1	Cytochrome P450 CYP2 subfamily	Q
AN1402.1	Acetyltransferase (isoleucine patch superfamily)	R
AN1403.1	Delta-aminolevulinic acid dehydratase	H	Coenzyme transport, metabolism	YGL040C	cytoplasm nucleus
AN1405.1
AN1407.1	Uncharacterized conserved protein	S		YHR122W	cytoplasm
AN1408.1	U5 snRNP-specific protein	J	Translation, ribosomal structure, biogenesis
AN1409.1	Acetyl-CoA acetyltransferase	I	Lipid transport, metabolism	YPL028W	nucleus
AN1413.1	mRNA cleavage and polyadenylation factor II complex, subunit CFT1 (CPSF subunit)	A	RNA processing, modification	YDR301W	nucleus
AN1416.1	Beta-glucosidase-related glycosidases	G	Carbohydrate transport, metabolism
AN1418.1	Glucosamine-6-phosphate isomerase	G	Carbohydrate transport, metabolism
AN1420.1	Putative Zn-finger protein	R
AN1421.1	Transcription regulator XNP/ATRX, DEAD-box superfamily	K	Transcription
AN1423.1	Permease of the major facilitator superfamily	R
AN1424.1	Dystonin, GAS (Growth-arrest-specific protein), and related proteins	Z	Cytoskeleton
AN1426.1	Serine carboxypeptidases (lysosomal cathepsin A)	OE
AN1427.1	Uncharacterized conserved protein	S
AN1428.1	N-acetyl-glucosamine-6-phosphate deacetylase	G	Carbohydrate transport, metabolism
AN1429.1	Choline dehydrogenase and related flavoproteins	E	Amino acid transport, metabolism
AN1430.1	NAD-dependent aldehyde dehydrogenases	C	Energy production, conversion
AN1432.1	Predicted RNA binding protein, contains G-patch and Zn-finger domains	A	RNA processing, modification
AN1433.1	Carboxylesterase and related proteins	R
AN1434.1	Nucleolar protein involved in 40S ribosome biogenesis	J	Translation, ribosomal structure, biogenesis
AN1436.1	predicted protein [Neurospora crassa]
AN1437.1	hypothetical protein [Neurospora crassa]
AN1438.1	hypothetical protein [Neurospora crassa]
AN1440.1	AAA+-type ATPase containing the bromodomain	O	Posttranslational modification/turnover/chaperones
AN1442.1	Preprotein translocase subunit Sec66	U	Intracellular trafficking/secretion/transport
AN1443.1	Predicted membrane protein, contains DoH and Cytochrome b-561/ferric reductase transmembrane domains	T	Signal transduction mechanisms
AN1444.1	hypothetical protein [Neurospora crassa]
AN1445.1	Predicted methyltransferase	R		YIL110W	cytoplasm nucleus
AN1446.1	Cystathionine beta-lyases/cystathionine gamma-synthases	E	Amino acid transport, metabolism	YAL012W	cytoplasm
AN1448.1	Translation initiation factor 4F, ribosome/mRNA-bridging subunit (eIF-4G)	J	Translation, ribosomal structure, biogenesis
AN1450.1	hypothetical protein [Dictyostelium discoideum]
AN1451.1
AN1452.1	FOG: RRM domain	R		YOL041C	nucleolus
AN1454.1	Cytoplasmic dynein intermediate chain	Z	Cytoskeleton
AN1455.1	Oligosaccharyltransferase, STT3 subunit	O	Posttranslational modification/turnover/chaperones	YGL022W	ER
AN1457.1	Permease of the major facilitator superfamily	G	Carbohydrate transport, metabolism
AN1458.1	predicted protein [Neurospora crassa]
AN1459.1	Dolichyl-phosphate-mannose:protein O-mannosyl transferase	O	Posttranslational modification/turnover/chaperones	YJR143C	ER
AN1460.1	Pirin-related protein	R
AN1461.1	Protein OS-9	R
AN1464.1	Uncharacterized conserved protein	S
AN1467.1	Serine/threonine protein phosphatase	T	Signal transduction mechanisms
AN1468.1	U4/U6 small nuclear ribonucleoprotein Prp4 (contains WD40 repeats)	A	RNA processing, modification	YPR178W	cytoplasm nucleus
AN1469.1	Mitochondrial J-type chaperone	O	Posttranslational modification/turnover/chaperones	YGL018C	mitochondrion
AN1472.1	Tellurite resistance protein and related permeases	P	Inorganic ion transport, metabolism
AN1474.1	RNA 3'-terminal phosphate cyclase	A	RNA processing, modification	YOL010W	nucleolus nucleus
AN1475.1	Cytoskeleton-associated protein and related proteins	ZR
AN1476.1	Synaptic vesicle transporter SVOP and related transporters (major facilitator superfamily)	R
AN1477.1	xylosidase [Penicillium herquei]
AN1478.1	RNA helicase BRR2, DEAD-box superfamily	A	RNA processing, modification	YER172C	cytoplasm nucleus
AN1480.1	hypothetical protein [Neurospora crassa]			YIR032C
AN1481.1	Predicted transporter (major facilitator superfamily)	R
AN1482.1	Acyl-CoA synthetase	I	Lipid transport, metabolism
AN1483.1	hypothetical protein [Neurospora crassa]
AN1484.1	Valyl-tRNA synthetase	J	Translation, ribosomal structure, biogenesis	YGR094W	cytoplasm
AN1485.1	Casein kinase II, alpha subunit	TDK		YOR061W	cytoplasm nucleus
AN1486.1	Protein subunit of nuclear ribonuclease P (RNase P)	J	Translation, ribosomal structure, biogenesis
AN1487.1	predicted protein [Neurospora crassa]
AN1488.1	E3 ubiquitin ligase	O	Posttranslational modification/turnover/chaperones
AN1489.1	predicted protein [Neurospora crassa]
AN1491.1	COP9 signalosome, subunit CSN1	OT
AN1493.1	predicted protein [Neurospora crassa]
AN1494.1	TATA binding protein associated factor	K	Transcription
AN1498.1	ATP adenylyltransferase (5',5'''-P-1,P-4-tetraphosphate phosphorylase II)	F	Nucleotide transport, metabolism	YDR530C	cytoplasm nucleus
AN1500.1	FOG: Zn-finger	R
AN1502.1	Beta-N-acetylhexosaminidase	G	Carbohydrate transport, metabolism
AN1503.1	Dihydrodipicolinate synthase/N-acetylneuraminate lyase	EM
AN1504.1	WASP-interacting protein VRP1/WIP, contains WH2 domain	Z	Cytoskeleton
AN1506.1	Fucose permease	G	Carbohydrate transport, metabolism
AN1507.1	predicted protein [Neurospora crassa]
AN1509.1	predicted protein [Neurospora crassa]
AN1510.1	Endoplasmic reticulum membrane-associated oxidoreductin involved in disulfide bond formation	OU		YML130C
AN1511.1	Peroxisomal biogenesis protein peroxin	U	Intracellular trafficking/secretion/transport
AN1512.1	Amidases	JIT
AN1513.1	Cysteine synthase	E	Amino acid transport, metabolism	YGR012W	mitochondrion
AN1516.1	Thiamine pyrophosphate-requiring enzyme	EH
AN1519.1	Translation initiation factor 2C (eIF-2C) and related proteins	J	Translation, ribosomal structure, biogenesis
AN1520.1	Nucleolar GTPase/ATPase p130	Y	Nuclear structure
AN1521.1	DNA-directed RNA polymerase subunit E'	K	Transcription	YDR404C	nucleus
AN1522.1	Predicted membrane protein	S		YGL010W	ER
AN1523.1	F0F1-type ATP synthase, alpha subunit	C	Energy production, conversion	YBL099W	mitochondrion
AN1524.1	Methylenetetrahydrofolate dehydrogenase/methylenetetrahydrofolate cyclohydrolase	H	Coenzyme transport, metabolism	YKR080W	cytoplasm nucleus
AN1525.1	predicted protein [Neurospora crassa]			YML055W	ER
AN1526.1	Uncharacterized conserved protein	S		YKL207W
AN1527.1	predicted protein [Neurospora crassa]
AN1528.1	DNA repair/transcription protein Mms19	LK
AN1532.1
AN1533.1	Predicted nucleolar protein involved in ribosome biogenesis	J	Translation, ribosomal structure, biogenesis	YPR144C	nucleus
AN1534.1	Mitochondrial F1F0-ATP synthase, subunit b/ATP4	C	Energy production, conversion	YPL078C	mitochondrion
AN1535.1	FOG: TPR repeat, SEL1 subfamily	R
AN1536.1	Chromosome segregation ATPases	D	Cell cycle/division, chrom. partitioning
AN1537.1	C3H1-type Zn-finger protein	R
AN1538.1	Transcription initiation factor IIF, small subunit (RAP30)	K	Transcription	YGR005C
AN1539.1	COP9 signalosome, subunit CSN4	OT
AN1540.1	predicted protein [Neurospora crassa]
AN1541.1	NAD-dependent aldehyde dehydrogenases	C	Energy production, conversion
AN1543.1	Fumarate reductase, flavoprotein subunit	C	Energy production, conversion	YJR051W	mitochondrion
[truncated: 3,994 more rows]

[truncated: 1 more sheets: top35]
