# Supplementary material for: Sequencing of Aspergillus nidulans and comparative analysis with A. fumigatus and A. oryzae
Source: Springer Nature journal article supplement (doi:10.1038/nature04341), 2005-12-01
Supplement: 41586_2005_BFnature04341_MOESM6_ESM.doc [file 41586_2005_BFnature04341_MOESM6_ESM.doc]

# Transposable Elements

A number of unusual features were also observed in *Aspergillus* TEs. First, in *A. fumigatus*, one subfamily of I-1_AF non-LTR retrotransposons has a unique target-site, and was found in long terminal repeats of the Afut2 *Gypsy*-like LTR retrotransposon. Second, the *Aspergillus* *Helitrons* have 5’-TT and CTTG-3’ termini, which differ from the canonical 5’-TC and CTRR-3’ termini70. Moreover, Aspergillus *Helitrons* do not contain 3’ palindromic structures, which are present in other eukaryotes70,71, indicating that 3’ palindromes are not essential for rolling-circle transpositions. Third, all three genomes possess unusual *Mariners*, 7-9 kb in length, that encode a conserved protein of unknown function in addition to a transposase. Finally, we identified families of SINE elements derived from the 5’-half of 5S rRNA containing an internal pol III promoter. They are the first examples of SINE elements present in fungi. Moreover, such 5s RNA derived SINE elements have been found previously in the zebrafish genome only.

Table §S5.1: Major superfamilies of transposable elements identified in the aspergillus genomes

| Species | Percentage of all TEs and repetitive elements in the assembly | Percentage of different classes among all transposable and repetitive elements | | | | | | |
| --- | --- | --- | --- | --- | --- | --- | --- | --- |
| Non-LTR retrotransposons | LTR retrotransposons | | DNA transposons | | | |
| I | Gypsy | Copia | *Mariner* | MuDR | hAT | Helitron |
| A. nidulans | 3.0 | 19 | 22 | 14 | 20 | 12† | 5† | 2 |
| A. fumigatus | 2.9 | 15 | 55 | 4 | 25 | - | - | - |
| A. oryzae | 1.4 | 20 | 31 | - | 49 | <<1 | - | - |

†Putative classification based on hallmarks of nonautonomous elements DNA9-1_AN, DNA9-2_AN, DNA9-3_AN, and DNA9-4_AN (MuDR superfamily) and hAT-N1_AN, and hAT-N2_AN (hAT superfamily). There are no MuDR and hAT transposases detectable in the aspergillus genomes.
