# Supplementary material for: Sequencing of Aspergillus nidulans and comparative analysis with A. fumigatus and A. oryzae
Source: Springer Nature journal article supplement (doi:10.1038/nature04341), 2005-12-01
Supplement: 41586_2005_BFnature04341_MOESM11_ESM.xls [file 41586_2005_BFnature04341_MOESM11_ESM.xls]

## Sheet: Sheet1
§S11 Genes Implicated In Sexual Reproduction in Fungi
Table §S11.1 provides a list of 215 genes that are implicated in sexual reproduction in fungi. In all cases, if a gene is present in A. nidulans, it is present in all three fungi.
Gene		Function	A.nidulans	A.fumigatus	A.oryzae
Mating Process
MAT1 (matB)		Mating-type (alpha-box domain transcriptional activator)	AN2755.2	-	20164.m00251*
MAT2 (matA)		Mating-type (HMG-box transcriptional activator)	AN4734.2	59.m09249	-
ppgA (MFa1, MFa2)		Pheromone precursor (alpha-factor like)	AN5791.2	69.m14805	20086.m00080*
ppgB (MFa1, MFa2)		Pheromone precursor (for a-factor like)	Ambiguous	Ambiguous	Ambiguous
(KEX1)		Carboxypeptidase alpha-factor processing	AN1384.2	70.m14837	20080.m00038*
KexB (KEX2)		Endoprotease for alpha-factor processing	AN3583.2	58.m07381	20179.m00626
(STE13)		Dipeptidyl aminopeptidase alpha-factor processing	AN2946.2	59.m09093	20174.m00466*
(STE23)		Dipeptidyl aminopeptidase for a-factor processing	AN8044.2*	53.m03900*	20129.m0021*
(RCE1)		CAAX prenyl protease a-factor C-terminal processing	AN6528.2	62.m03116	20107.m00091*
(STE24)		CAAX prenyl protease	Yes**	58.m07859	20142.m00264*
(RAM1/STE16)		CAAX-farnesyltransferase beta subunit; a-factor modification	AN2002.2	58.m07610	20138.m00208*
(RAM2)		CAAX-farnesyltransferase alpha subunit	AN3867.2	58.m07839	20142.m00239*
(STE14)		CAAX-prenyl cysteine carboxymethyltransferase	AN6162.2	72.m19009	20177.m00422*
atrD (STE6)		ATP-dependent efflux pump for a-factor like pheromone	AN2300.2	58.m08958	20136.m00137*
Mating Signalling
preB (STE 2)		Pheromone Receptor (for alpha-factor like pheromone)	AN2520.2	59.m08468	20123.m00180*
preA (STE 3)		Pheromone Receptor (for a-factor like pheromone)	AN7743.2	71.m15771	20162.m00356*
fadA (GPA1)		Alpha-subunit G protein	AN0651.2	70.m15256	20180.m01174
sfaD (STE 4)		Beta-subunit G protein	AN0081.2	71.m15359	20148.m002796*
(STE5)		Scaffold protein	-	-	-
(STE18)		Gamma-subunit G protein	AN2742.2 *	54.m06689	20175.m00541*
(STE20)		Serine/threonine protein kinase MKKKK	AN2067.2*	57.m05766	20178.m00629*
steC (STE11)		Serine/threonine protein kinase MKKK	AN2269.2	71.m15914	20132.m00123*
(STE7)		Serine/threonine protein kinase MKK	AN3422.2*	59.m09275	20164.m00222*
mpkB (FUS3)		Mitogen-activated protein kinase	AN3719.2	69.m15727	20178.m00764*
steA (Ste12)		Transcriptional Activator. Homeodomain DNA binding	AN2290.2	71.m15938*	20132.m00151*
(FAR1)		Cell cycle arrest in G1/various other roles	-	-	-
(STE50)		Pheromone adaptation feedback response	AN7252.2 *	72.m19797	20134.m00115*
(DIG1/RST1)		Transcription factor, interacts ste12 pheromone response	-	-	-
(DIG2/RST2)		Transcription factor, interacts ste12 pheromone response	-	-	-
Fruiting Body Development
veA		Velvet activator induces sexual reproduction A.nidulans	AN1052.2	70.m15191*	20173.m00346*
NsdD		GATA-transcription factor	AN3152.2	59.m08512*	20010.m00003*
CsnD		Signalosome subunit 4, regulation of sexual development	AN1539.2	55.m03058*	20171.m00527*
CsnE		Signalosome subunit 5, regulation of sexual development	AN2129.2	72.m19712*	20115.m00100*
rosA		Binuclear zinc transcription factor	AN5170.2	69.m14866	20084.m00028
mutA		Mutanase, cell wall turnover during sexual development	AN7349.2	57.m05694*	20150.m00367*
stuA		APSES-transcription factor	AN5836.2	72.m19916*	20177.m00377*
medA		Transcription factor	AN6230.2	72.m19977*	20141.m00193*
prot1††		Cys6-Zn2 transcriptional activator	AN1848.2*	58.m07662*	20129.m00151*
Nc mat A-2		mating type TF; conserved amphipathic helix	No	No	No
Nc mat A-3		mating type HMG box TF	No	No	No
Nc asd-1		ascus development; rhamnogalacuronase B	AN7135.2	89.m02015	20153.m00219
Nc asd-4		ascus development; GATA-Zn finger transcription factor	areB	72.m19434	20141.m00163
Nc mei-3 (Sc RAD52)		meiosis defective;	uvsC	uvsC	uvsC
Um rum1		repressor of b mating type regulated genes	AN8211.2	53.m03763	20147.m00252
Um umc1		MADS-box TF, modulator of pheromone-inducible gene expression	AN8676.2	62.m03394	20152.m00250
Pa cro1 (Sc SHE4)		regulator of myosin function;required for syncytial to cellular transition	AN0135.2	71.m15419	20158.m00313
Budding and Fisson Yeast Genes involved in Mating, Karyogamy and Meiosis
Sc BIM1		microtubule-binding protein	AN2862.2	59.m08708	20175.m00472
Sc BNI1		formin	AN6523.2	62.m03112	20107.m00085
Sc CDC31		spindle pole body component	AN5618.2*	58.m07543*	20138.m00126*
Sc CSM1		mediates accurate chromosome segregation during Meiosis I	No	No	No
Sc CSM3		mediates accurate chromosome segregation during meiosis	No	No	No
Sc DIT1		sporulation-specific enzyme required for spore wall maturation	AN2705.2	67.m02885	20137.m00125
Sc HO		endonuclease, mating type switching	No	No	No
Sc IDS2		modulator of Ime2 activity	No	No	No
Sc IME1		master transcriptional regulator of meiosis	No	No	No
Sc IME2		inducer of meiosis, S/T kinase	AN6243.2	72.m19414	20141.m00207
Sc IME4		mRNA N6-adenosine methyltransferase, IME1 regulation	No	No	No
Sc KAR1		required for karyogamy	No	No	No
Sc KAR3		kinesin-like motor required for karyogamy	AN6340.2	72.m19518	20135.m00123
Sc KAR4		TF required for mating and meiosis	No	No	No
Sc KAR5		nuclear membrane fusion during karyogamy	ambiguous	ambiguous	No
Sc KAR9		cytoplasmic microtubule orientation during karyogamy	No	No	No
Sc MUM2		essential for meiotic DNA replication	No	No	No
Sc MUS81		Holliday junction resolvase	AN3118.2	59.m08619	20140.m00135
Sc NAM8/MRE2		RNA binding protein required for meiotic recombination	AN9090.2	66.m04770	20169.m00407
Sc NDT80		meiosis-specific transcriptional activator	AN6015.2*	72.m19128*	20177.m00637*
Sc REC102		chromosome synapsis during meiotic recombination	No	No	No
Sc RIM4		RNA-binding protein, early and middle sporulation gene expression	No	No	No
Sc RME1		Zn finger transcriptonal repressor of IME1	No	No	No
Sc STE6		ABC transporter required fo a-factor transport	AN2300.2	58.m08958	20136.m00137
Sc SPO1		meiosis-specific phospholipase B	No	No	No
Sc SPO11		required for synaptonemal complex formation	AN8259.2	53.m03702	20147.m00194
Sc SPO13		meiosis specific protein required for Meiosis I and II	No	No	No
Sc SST2		RGS protein, regulates desensitization to alpha-factor	flbA	72.m19237	20082.m00044
Sc SPO22		meiosis-specific phospholipase A2	No	No	No
Sc SUM1		transcriptional repressor of middle sporulation-specific genes	No	No	No
Sc UME3/SSN8		C-type cyclin	AN2172.2	72.m19668	20180.m00841
Sc UME6		C6 Zn finger regulator of early meiotic genes	No	No	No
Sp atf21		bZip TF, involved in regulation of meiosis	AN6849.2*	59.m09396*	20175.m00406*
Sp bgs1		1,3-beta-glucan synthase subunit, Sp Mei4 target gene	AN3729.2	69.m15386	20179.m00743
Sp byr1		homologue of Sc STE7
Sp byr2		homolouge of Sc STE11
Sp dhc1		dynein heavy chain, homologue of Sc DYN1	nudA	71.m15397	10004.m0006
Sp fus1		homologue of Sc BNI1
Sp gpa1		GTP binding (alpha-1 subunit) involved in conjugation	AN3090.2	59.m08656	20171.m00394
Sp hsk1		homologue of Sc CDC7, Dbf4-dependent kinase	AN3450.2	59.m09313	20102.m00075
Sp isp5		amino acid permease involved in sexual differentiation	AN5678.2	65.m07404	20146.m00246
Sp isp6		serine protease involved in sexual differentiation	AN0238.2	71.m15644	20121.m00147
Sp lid2		homologue of Um rum1, Sc ECM5
Sp ume3		homologue of Sc UME3
Sp mam1		abc transporter for m-factor pheromone, homologue of Sc STE6
Sp mam2		pheromone p-factor receptor, homologue of Sc STE2
Sp mam4		M-factor farnesyl cysteine carboxyl methyltransferase	AN6162.2	72.m19009	20177.m00422
Sp map1		MADS-box domain TF, pheromone receptor activator	AN8676.2*	62.m03394*	20152.m00250*
Sp map2		P-factor pheromone	No	No	No
Sp map3		pheromone M-factor receptor, homologue of Sc STE3
Sp mat1-Mc		mating-type M-specific polypeptide Mc, HMG-box TF	AN1962.2*	58.m09001*	20138.m00150*
Sp mat1-Mi		mating-type M-specific polypeptide Mi	No	No	No
Sp mat1-Pc		mating-type P-specific polypeptide Pc, HMG-box TF	No	No	No
Sp mat1-Pi		mating-type P-specific polypeptide Pi, homeodomain TF	No	No	No
Sp mde3		homologue of Sc IME2, Sp Mei4 target gene	AN6243.2	72.m19414	20141.m00207
Sp mde5		kelch repeat protein, Sp Mei4 target gene	No	No	No
Sp mde6		ketch repeat protein, Sp Mei4 target gene	No	No	No
Sp mde7		RNA-binding protein involved in meiosis, Sp Mei4 target	AN7700.2	71.m15729	20162.m00295
Sp mfm1,mfm2,mfm3		M-factor pheromone precursor	No	No	No
Sp mei2		RNA-binding protein involved in meiosis	AN6494.2*	62.m03081*	20059.m00031*
Sp mei3		meiosis inducing protein, inactivates Sp Ran1	No	No	No
Sp mei4		fork head domain TF, meiotic regulator	AN8858.2*	71.m15996*	20108.m00079*
Sp mes1		meiosis II protein, Sp Mei4 target gene	No	No	No
Sp meu1		Sp Mei4 target gene	apsB	62.m03168	20174.m00436
Sp meu14		involved in Meiosis II nuclear division, Sp Mei4 target gene	AN3931.2	69.m14916	20174.m00532
Sp mus81		homologue of Sc MUS81
Sp pkl1		homologue of Sc KAR3
Sp rad22		DNA repair protein	radC	58.m08972	20110.m00135
Sp ran1/pat1		serine/threonine protein kinase, negative regulator of meiosis	AN4935.2	59.m08839	20175.m00321
Sp rec6		meiotic recombination protein	No	No	No
Sp rec8		cohesin complex (meiotic), homologue of Sc REC8	No	No	No
Sp rec10		sister chromatid cohesion	No	No	No
Sp rec11		sister chromatid cohesion	No	No	No
Sp rec12		homologue of Sc SPO11
Sp rec15		meiotic recombination protein	No	No	No
Sp rem1		meiotic B-type cyclin	AN2137.2	72.m19703	20180.m00780
Sp rep1		regulator of pre-meiotic DNA replication	No	No	No
Sp rgs1		homologue of Sc SST2
Sp rhp51		homologue of Sc RAD51//52, Nc mei-3	uvsC	uvsC	uvsC
Sp spk1		homologue of Sc FUS3	mpkB	69.m15727	20178.m00764
Sp spo6		homologue of Sc DBF4, required for orign of replication firing	nimO	69.m15647	20161.m00192
Sp ssm4		dynactin complex, homologue of Sc NIP100	AN6323.2	72.m19441	20141.m00154
Sp ste4		SAM domain, similar to Sc STE50	AN7252.2	72.m19797	20134.m00115
Sp ste6		GEF involved in conjugation; related to Sc CDC25	AN2130.2	72.m19711	20115.m00099
Sp ste7		meiotic suppressor protein	No	No	No
Sp ste11		HMG-box TF, target of pheromone signaling	AN3667.2*	58.m07428*	20179.m00464*
Sp spn5		septin, Sp Mei4 target gene	sepB	65.m07502	20176.m00407
Sp spn7		septin, Sp Mei4 target gene	AN4667.2	71.m15708	20176.m00407
Sp sxa2		serine carboxypeptidase, degrades extracellular P-factor	AN2555.2	57.m05650	20156.m00343
Sp tht1		homologue of Sc KAR5
Core Meiotic Transcriptome Conserved in S. cerevisiae and S. pombe
Anaphase-promoting complex
Sc CDC27/ Sp nuc2		APC component	bimA	72.m19026	20177.m00440
Sc APC4/ Sp cut20		APC component	AN0905.2	70.m15514	ambiguous
Sc CDC16/ Sp cut9		APC component	AN8002.2	53.m03844	20159.m00191
Sc APC1/ Sp cut4		APC component	AN2772.2	59.m09271	20164.m00226
Sc APC5/ Sp apc5		APC component	AN4735.2	59.m09246	20164.m00254
Sc CDC23/ Sp cut23		APC component	AN8013.2	53.m03861	20159.m00208
Sc CDC26/ Sp hcn1		APC component	No	No	No
Sc HCT1/ Sp ste9		APC regulator	AN2965.2	59.m09050	20174.m00432
Sc CDC20/ Sp mfr1		APC regulator	AN2965.2	59.m09050	20174.m00432
Sc AMA1/ Sp slp1		APC regulator	AN0814.2	70.m15414	20125.m00181
Septins
Sc CDC10/ Sp spn2		septin	AN1394.2	70.m14828	20070.m00026
Sc CDC3/ Sp spn5		septin	sepB	65.m07502	20176.m00407
Sc SPR3/ Sp spn6		sporulation regulated septin	AN8182.2	53.m03797	20147.m00293
Sc SPR28/ Sp spn7		sporulation regulated septin	AN4667.2	71.m15708	20148.m00144
Cell cycle regulators
Sc CDC14/ Sp clp1		protein phosphatase	AN5057.2	59.m08669	20175.m00513
Sc CDC5/ Sp plo1		polo kinase	AN1560.2	55.m03076	20176.m00605
Sc CLB1/ Sp cig2		B-type cyclin	nimE	58.m07451	20165.m00281
Sc CLB3/ Sp cdc13		B-type cyclin	AN2137.2	72.m19703	20180.m00780
Sc CLB4/ Sp cig1		B-type cyclin
Sc CLB5		B-type cyclin
Sc CLB6		B-type cyclin
Recombination/chromosome cohesion
Sc REC114/ Sp rec7		meiotic recombination protein	No	No	No
Sc DMC1/ Sp dmc1		DNA-binding helix-hairpin-helix protein, DNA strand exchange	AN9092.2	66.m04768	20169.m00401
Sc MND1/ Sp mcp7		recombinatino and meioic nuclear division, interacts with Hop2	AN1843.2	58.m07668	20129.m00169
Sc HOP2/ Sp meu13		prevents synapsis between nonhomologous chromosomes	No	No	No
Sc SMC3/ Sp smc3		cohesin	AN6364.2	72.m19496	20116.m00127
Sc REC8/ Sp rec8		cohesin complex (meiotic)	No	No	No
Chromosome segregation
Sc STU1/ Sp dis1		spindle pole body component	AN5521.2	69.m15719	20178.m00784
Sc TID3/ Sp ncd10		chromosome segregation, kinetochore-associated Ndc80 complex	AN4969.2	59.m08873	20125.m00127
Sc UBC11/ Sp ubc11		ubiquitin-conjugating enzyme, chromosome segregation in Sp	AN5495.2	69.m15458	20178.m00805
DNA repair
Sc RAD23/ Sp rhp23		DNA excision-repair, NEF2 subunit	AN2304.2	71.m15953	20108.m00125
Sc EXO1/ Sp exo1		DNA repair, recombination	AN3035.2	59.m08982	20174.m00347
Sc HRR25/ Sp hhp1		casein kinase involved in DNA repair and chromsome segregation	AN4563.2	57.m05554	20158.m00387
Other genes in the conserved meiotic core program
Sc HUL4/ SPBP87.27		hect domain E3 ubiquitin-protein ligase	AN0444.2	54.m06635	20175.m00618
Sc LEE1/ Sp scp3		Zn finger transcription factor, unknown function	AN3447.2	59.m09478	20102.m00073
Sc ENA2/ Sp cta3		P-type ATPase sodium pump	AN6642.2,	62.m03239,	20132.m00104,
			AN1628.2	58.m07687	20136.m00211
Sc PMC1/ SPBC839.06		vacuolar ATPase Ca2+ pump	AN1189.2	70.m15033	20168.m00440
Sc CMK2/ Sp cmk1		calmodulin-dependent protein kinase	AN3065.2,	59.m08933,	20174.m00277,
			AN2412.2	72.m19463	20073.m00030
Sc CHS1/ Sp chs1		chitin synthase, pheromone inducible	AN4566.2	57.m05488	20153.m00320
Sc ISA1/ SPCC645.03C		mitochondrial matrix protein, iron metabolism	AN1974.2	58.m07579	20138.m00166
Sc HTZ1/ Sp pht1		histone H2AZ varient	AN8039.2	53.m03907	20167.m00250
Sc AUT7/ SPBP8B7.24C		required for autophagic vesicle delivery to vacuole in Sc	AN5131.2	54.m06897	20128.m00130
Sc BAG7/ SPBC557.01		Rho-GAP	AN7650.2	57.m05408	20105.m00070
Sc ROM2/ SPAC1006.06		Rho-GEF	AN4719.2	71.m15707	10080.m00170
Sc RAS2/ Sp ras1		Ras	AN0182.2	71.m16065	20158.m00254
Sc GNA1/ Sp gna1		glucosamine acetyl transferase involved in cell cycle progression	AN8706.2	62.m03363	20152.m00287
Sc SGA1/ Sp meu17		sporulation-specific glucosamylase, Sp Mei4 target gene	AN8904.2	57.m05372	20130.m00115,
					20178.m00683
Sc CLG1/ SPBC1D7.03		cyclin-like protein interacts with Sc Pho85	AN4984.2	59.m08886	20125.m00144
Sc CYB2/ SPAB1A11.03		cytochrome-c oxidoreductase	AN3901.2	89.m01949|	20115.m00086
Sc ECM4/ SPCC1281.07C		glutathione-S-transferase domain, unknown function	AN5831.2	72.m19666	20097.m00066
Sc TOS7/ SPCC1739.10		unknown function in yeasts, putative membrane component of	palI	59.m09122	20164.m00305
		signal transduction pathways for pH regulation in A. nidulans
Sc ARN2/ SPCC61.01C		ARN family of transporters for siderophore-iron chelates	AN5378.2	65.m07225	20176.m00502
Sc GTT1/ SPAC688.04C		ER associated glutathione S-transferase	AN0629.2	70.m15652	20155.m00295
Sc RIB5/ SPCC1450.13C		riboflavin synthase, alpha subunit	AN4231.2	54.m06785	20071.m00045
Sc CHO1/ SPCC1442.12		phosphatidylserine synthase	AN5661.2	58.m08891	20179.m00714
Sc XKS1/ SPCPJ732.02C		xyulose kinase	AN8790.2	71.m15584	20113.m00155
Sc PCT1/ SPCC1827.02C		CTP:phosphocholine cytidylyltransferase	AN1357.2	70.m14873	20074.m00033
Sc ELC1/ SPBC1861.07		transcription elongation factor	No	69.m15210	20101.m00073
Sc SYF2/ SPBC3E7.13C		splicesome component	AN1861.2	58.m07654	20129.m00143
Sc PGM2/ SPBC32F12.10		phosphoglucomutase	AN2867.2	59.m08711	20175.m00469
Sc RKI1/ Sp ppi		ribose-5-phosphate isomerase	AN2440.2	69.m15218	20101.m00084
Sc SUR4/ SPAC1B2.03C		long chain fatty acid elongation enzyme	AN8117.2	53.m03827	20159.m00172
Sc PIB1/ SPBC36B7.05C		RING-type ubiquitin ligase, FYVE finger domain	AN0627.2*	70.m15658*	20174.m00539*,
					20093.m00096*
Sc PIN3/ Sp csh3		SH3-domain protein	AN2995.2	59.m09437	20174.m00392
Sc SSO2/ Sp sso1		syntaxin	AN3416.2	66.m04618	20041.m00017
Sc FBP1/ Sp fbp1		fructose-1,6-biphosphatase	AN5604.2	58.m07528	20138.m00109
Sc GLG1/ SPBC4C3.08		self-glucosylating initiator of glycogen synthesis	AN4082.2	54.m06723	No
Sc ARE2/ SPAC13G7.05		acyl-CoA:sterol acyltransferase	AN4208.2	54.m06767	20068.m00041
Sc GDI1/ Sp gdi1		secretory pathway regulator	AN5895.2	72.m19235	20082.m00039
Sc PDC1/ SPAC3H8.01		pyruvate decarboxylase	AN4888.2	59.m08784	20175.m00382
Sc OXR1/ SPAC8C9.16C		unknown function	AN3004.2	59.m09010	20174.m00378
Sc KGD1// SPBC3H7.03C		mitochondrial alpha-ketoglutarate dehydrogenase complex	AN5571.2	58.m07497	20165.m00219
Sc DAP1/ SPAC26H5.15		Sc damage response, related to mammalian membrane progesterone receptors	AN4939.2	59.m08843	20175.m00316
* homology limited to functional domain
**present but missing in official annotation
Sc=Saccharomycese cerevisiae; Sp=Schizosaccharomyces pombe; Nc=Neurospora crassa; Um=Ustilago maydis; Pa=Podospora anserina
